# Supplementary material for: Versatile, tunable method for NaNO2/HX (Cl or Br)–mediated radical dihalogenation or nitration of olefins
Source: Research Square preprint supplement (doi:10.21203/rs.3.rs-5535688/v1), 2024-12-05
Supplement: Supplementary file 1 [file 5649102968e9e2e884a2f41f.pdf]

# Supporting Information

## Versatile, tunable method for NaNO<sub>2</sub>/HX (Cl or Br)–mediated radical dihalogenation or nitration of olefins

Jinglian Nong<sup>1</sup>, Zehui Cao<sup>1</sup>, Qin He<sup>1</sup>, Yangyang Zhang<sup>1</sup>, Jichao Chen<sup>1\*</sup>, and Yaxin Wang<sup>1\*</sup>

<sup>1</sup>College of Pharmacy, Nanjing University of Chinese Medicine, Nanjing 210023, China.

E-mail: 300500@njucm.edu.cn

### Content

|                                                                                  |      |
|----------------------------------------------------------------------------------|------|
| 1. Reagents.....                                                                 | S2   |
| 2. Instruments .....                                                             | S2   |
| 3. Synthesis of substrates .....                                                 | S2   |
| 4. Reaction optimization for dichlorination and nitration of olefin 1.....       | S15  |
| 5. General procedures and substrate scope of dichlorination reactions.....       | S18  |
| 6. General procedures and substrate scope of dibromination reactions .....       | S42  |
| 7. General procedures and substrate scope of nitration reactions.....            | S60  |
| 8. Synthetic applications .....                                                  | S80  |
| 9. Mechanistic studies.....                                                      | S86  |
| 10. References .....                                                             | S98  |
| 11. <sup>1</sup> H NMR, <sup>13</sup> C NMR and <sup>19</sup> F NMR spectra..... | S101 |

## 1. Reagents

All commercial materials were used as received unless otherwise noted. Superdry solvents and deuterated solvents were purchased from *J&K* Chemical. Starting materials were synthesized according to reported procedures. Aqueous HCl (37% in water, GENERAL-REAGENT Titan), aqueous HBr (40% in water, GENERAL-REAGENT Titan), and NaNO<sub>2</sub> (99.99%, Adamas-beta) were used in the chloridation, dibromination and nitration of olefins. TLC were performed on silica gel Huanghai HSGF254 plates and visualization of the developed chromatogram was performed by fluorescence quenching ( $\lambda_{\text{max}} = 254 \text{ nm}$ ). Flash chromatography was performed using silica gel (200-300 mesh) purchased from Qingdao Haiyang Chemical Co., China.

## 2. Instruments

NMR spectra were recorded on Bruker AVANCE AV 500 instruments and all NMR experiments were reported in units, parts per million (ppm), using residual solvent peaks as internal reference. Multiplicities are recorded as: s = singlet, d = doublet, t = triplet, dd = doublet of doublets, td = triplet of doublets, br = broad singlet, m = multiplet. High resolution ESI mass experiments were operated on a Waters LCT Premier instrument. All reactions were carried out in a 4 mL glass vial (Thermo SCIENTIFIC National B7999-2, made from superior quality 33 expansion borosilicate clear glass), sealed with a PTEF cap on bench top if necessary.

Lights: PHILIPS TORNADO 24W CFL, Cnlight 220V/24W UV (254nm), Cnlight 220V/24W UV (365nm), Cnlight LED lights 24 W (red LED, yellow LED, green LED, blue LED, purple LED, white LED) were used in the screening conditions of dichlorination and dibromination of olefins. Cnlight blue LED 24 W was used in the dichlorination and dibromination of olefins.

## 3. Synthesis of substrates

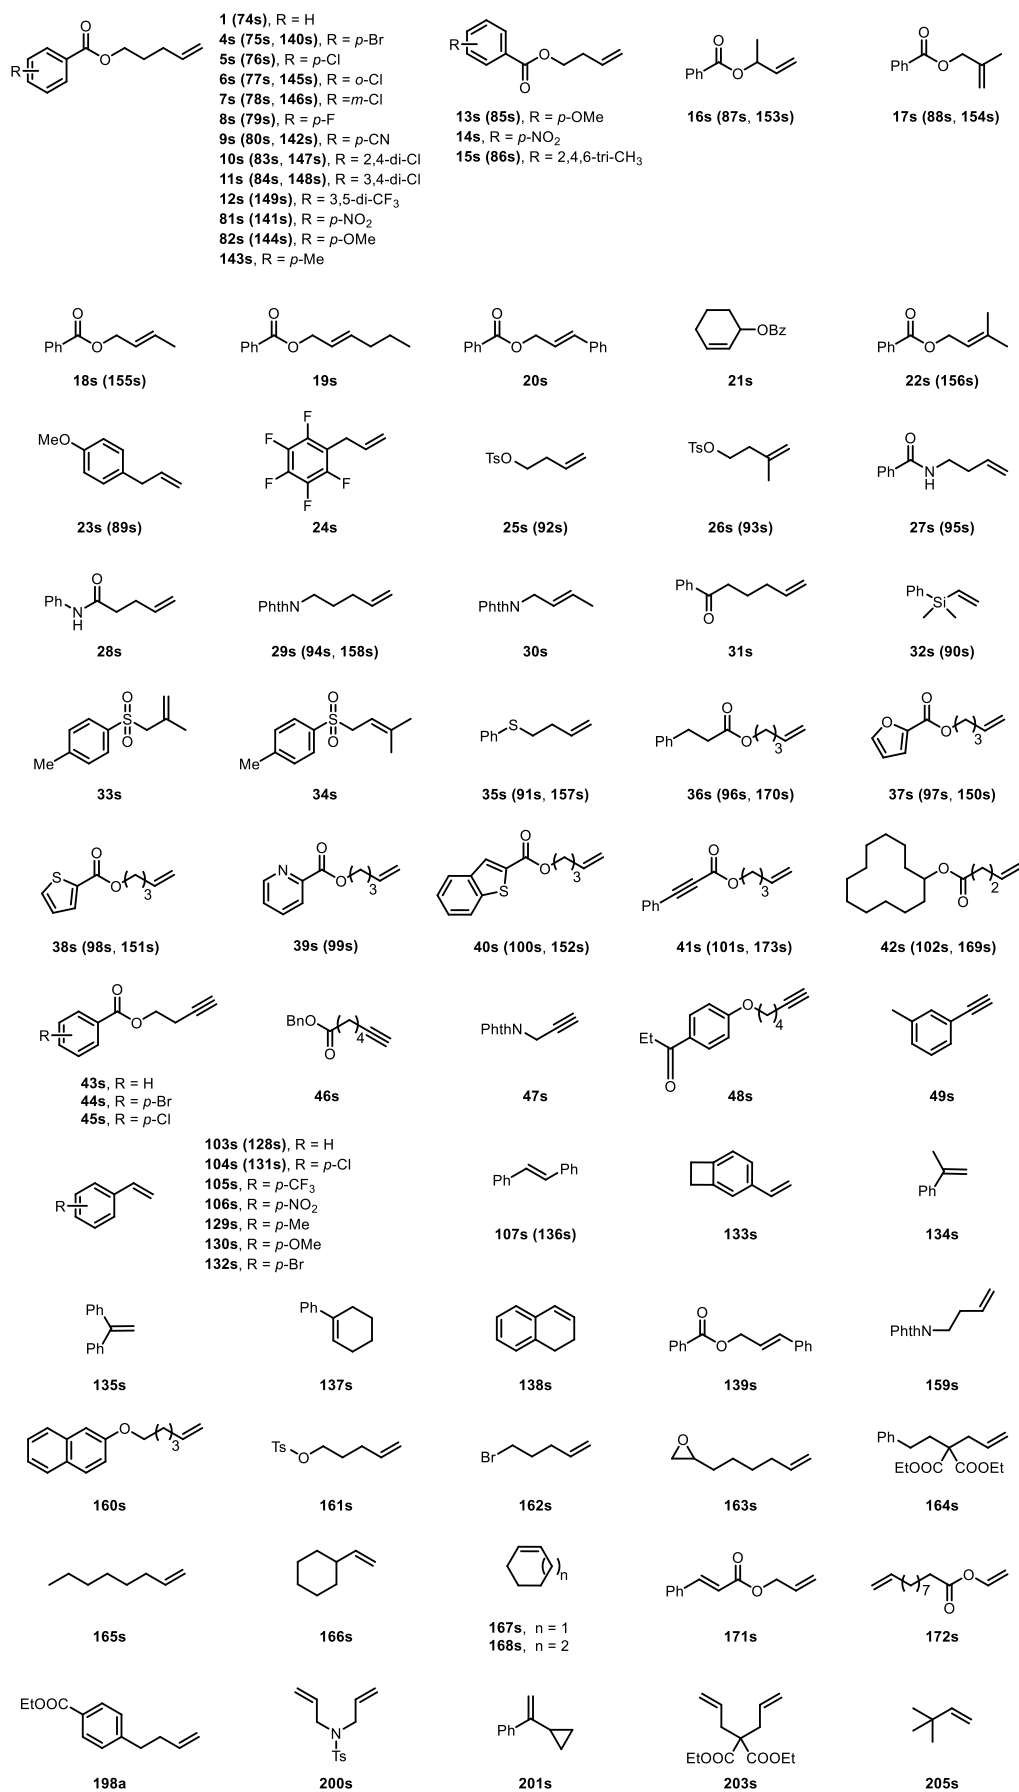

Scheme S1. Alkenes and alkynes substrates used in this study

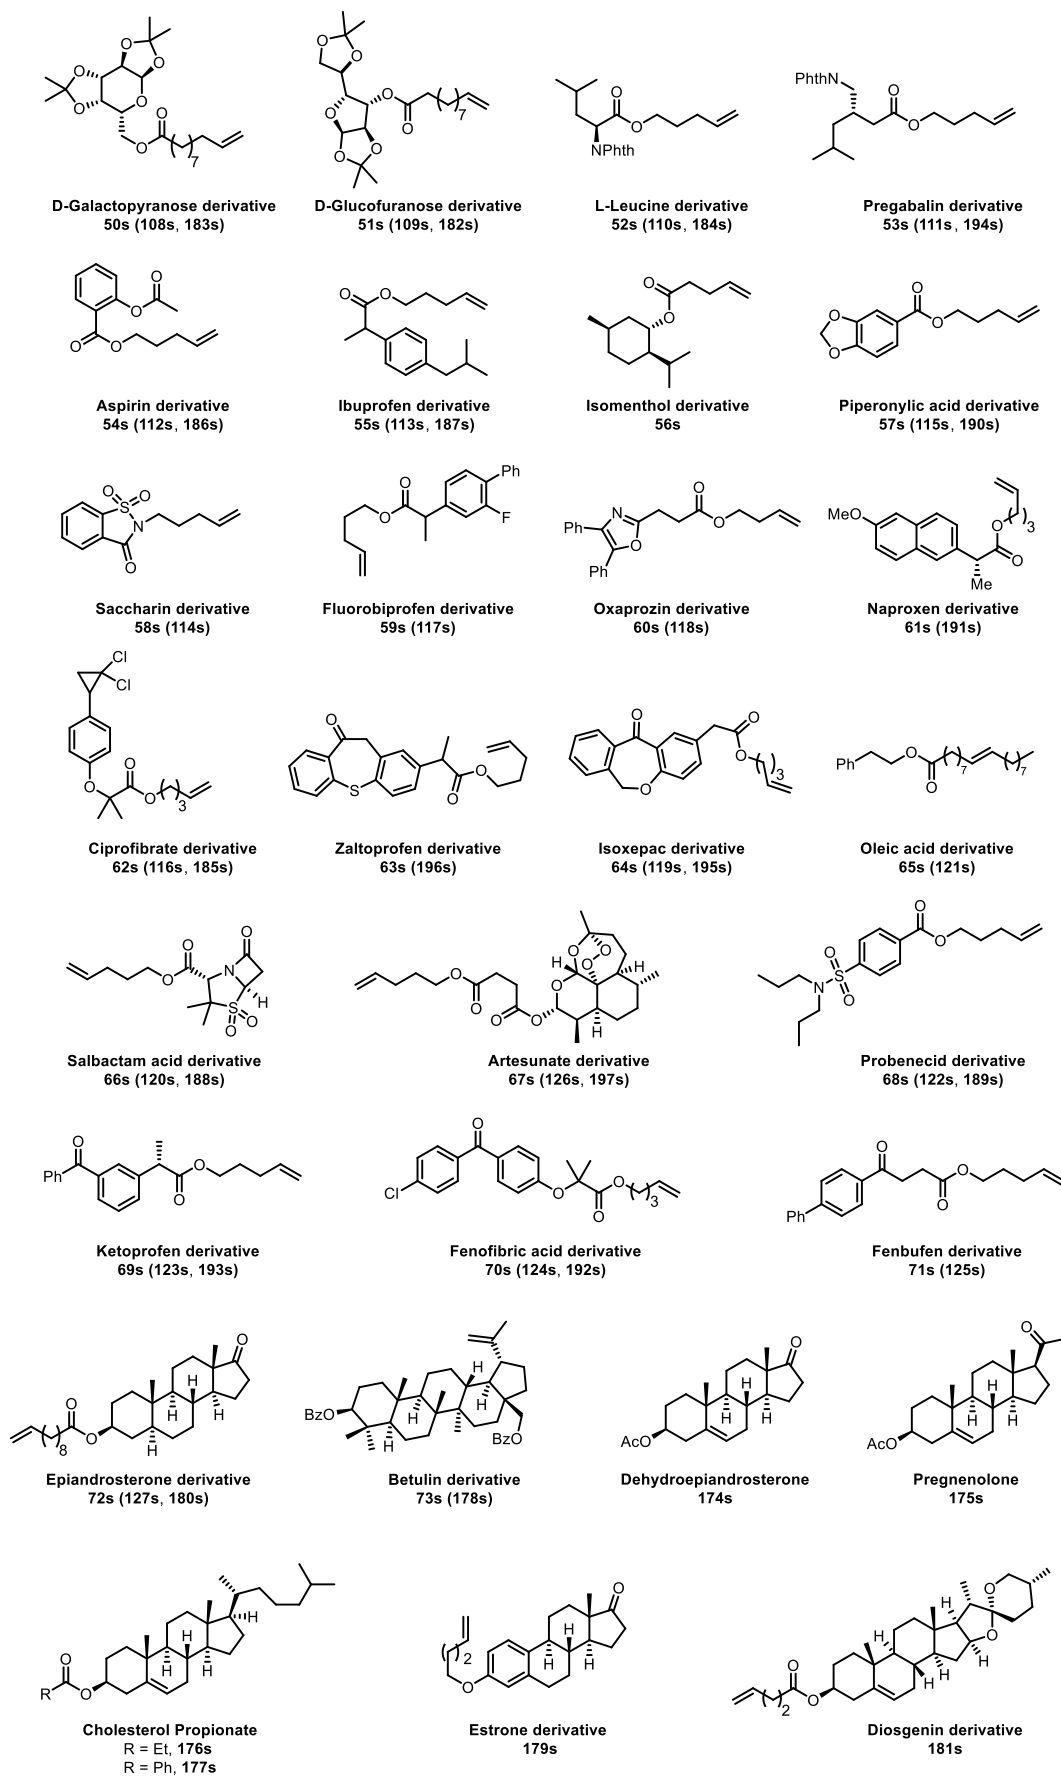

**Scheme S2.** Natural products and drug derivatives substrates used in this study



Compounds **23s**, **24s**, **32s**, **49s**, **103s** to **107s**, **129s**, **130s**, **132s** to **135s**, **137s**, **138s**, **162s**, **163s**, **165s** to **168s**, **171s**, **172s**, **198a**, **203s**, **205s** were commercial available and used as received. Other compounds for this study were known compounds and were synthesized following the reported procedures.

### 3.1 Synthesis of compounds **1**, **4s** to **15s**, **36s** to **46s**, **50s**, **51s**, **54s** to **57s**, **59s** to **72s**, **81s**, **82s**, **143s**, **174s** to **177s**, **181s**

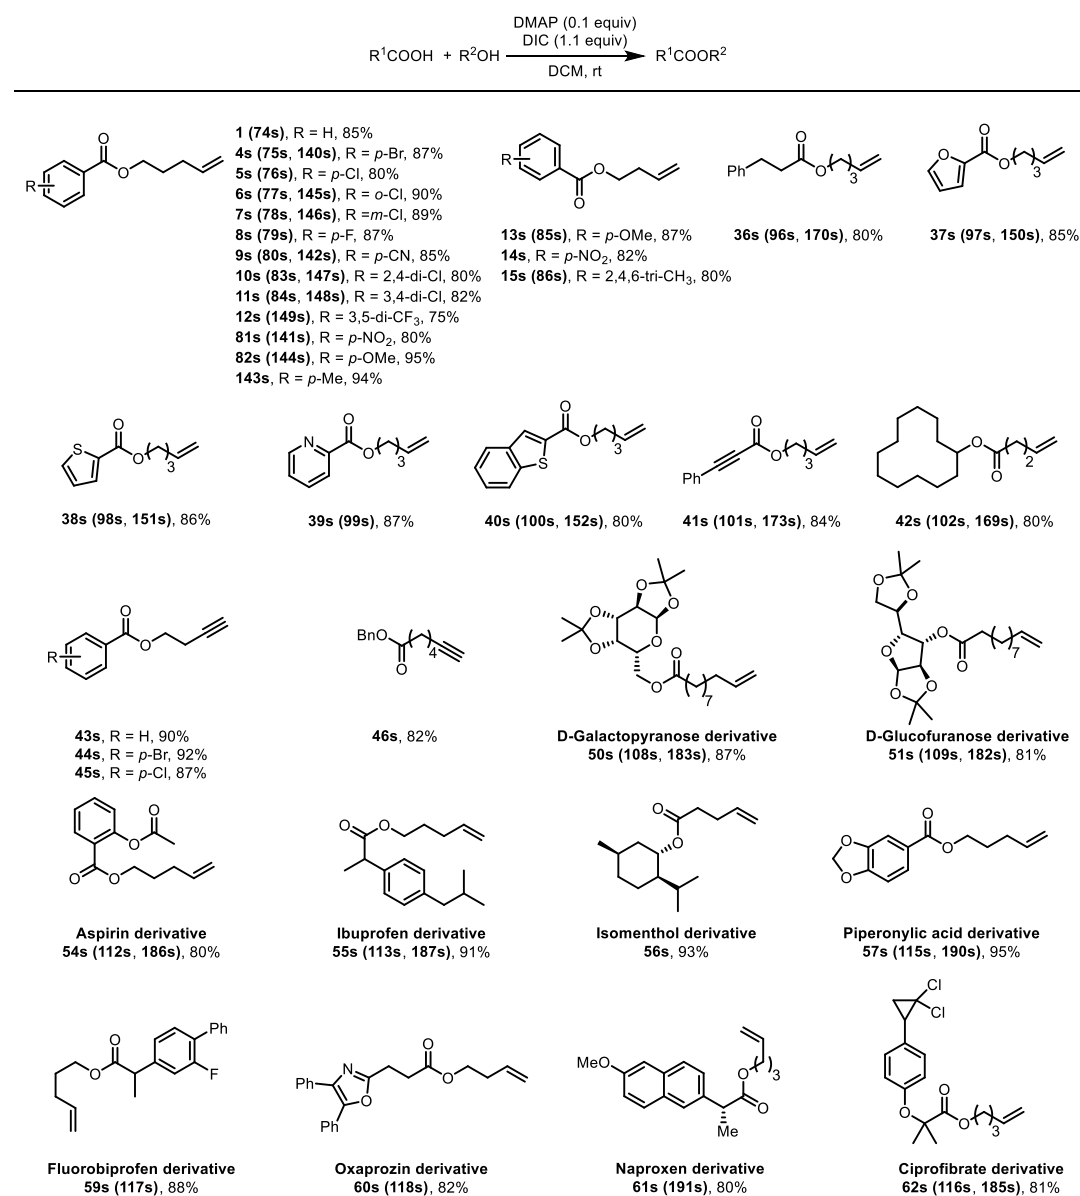

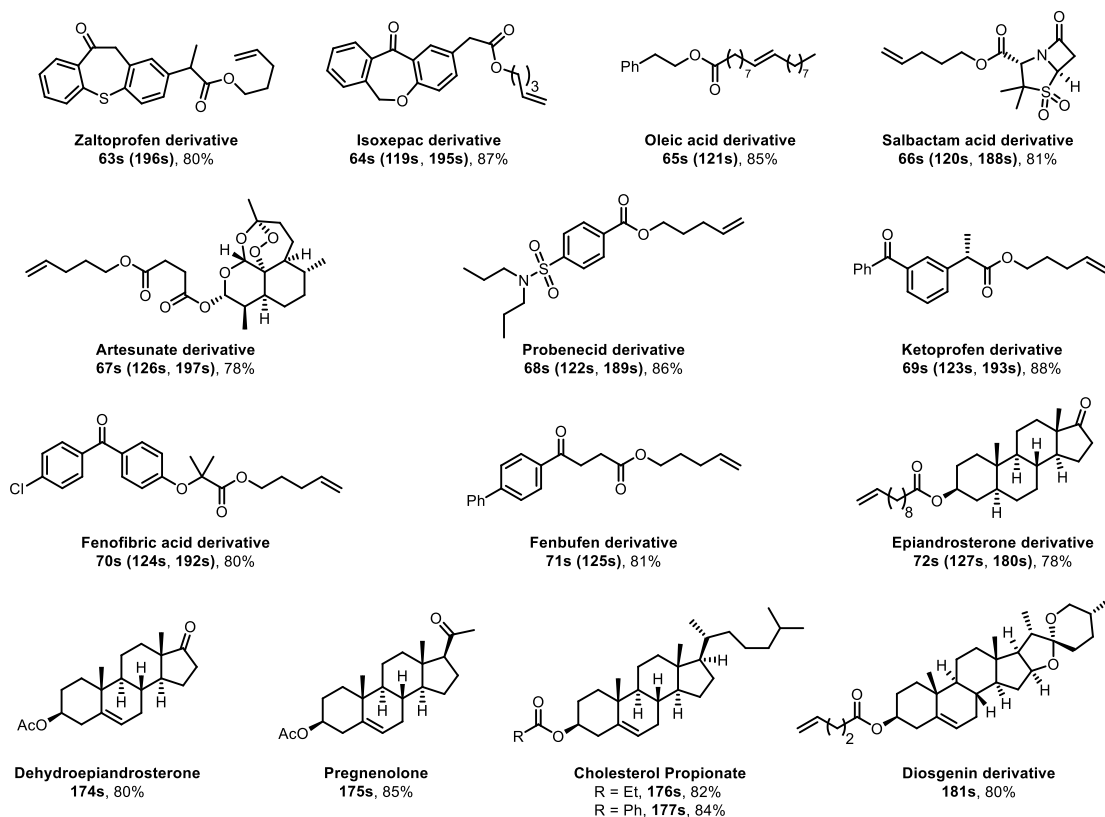

**Scheme S3.** Synthesis of compounds **1**, **4s** to **15s**, **36s** to **46s**, **50s**, **51s**, **54s** to **57s**, **59s** to **72s**, **81s**, **82s**, **143s**, **174s** to **177s**, **181s**

To a solution of acid (10.0 mmol, 1.0 equiv) in DCM (50.0 mL) was added *N, N'*-diisopropylcarbodiimide (DIC) (11.0 mmol, 1.1 equiv), 4-dimethylaminopyridine (DMAP) (1.0 mmol, 0.1 equiv) and alcohol (10.0 mmol, 1.0 equiv). Stir the reaction mixture for 24 h. The reaction mixture was poured into H<sub>2</sub>O (75.0 mL) and extracted with CH<sub>2</sub>Cl<sub>2</sub> (3 x 50 mL). The combined organic phase was washed with 100.0 mL of aq. KOH (0.2 M) and water. The organic phase was dried over anhydrous Na<sub>2</sub>SO<sub>4</sub>, filtered and concentrated in vacuo. The resulting residue was purified by silica gel column chromatography to afford compounds **1**, **4s** to **15s**, **36s** to **46s**, **50s**, **51s**, **54s** to **57s**, **59s** to **72s**, **81s**, **82s**, **143s**, **174s** to **177s**, **181s**.<sup>1</sup>

### 3.2 Synthesis of compounds **16s** to **22s**, **73s**, **139s**

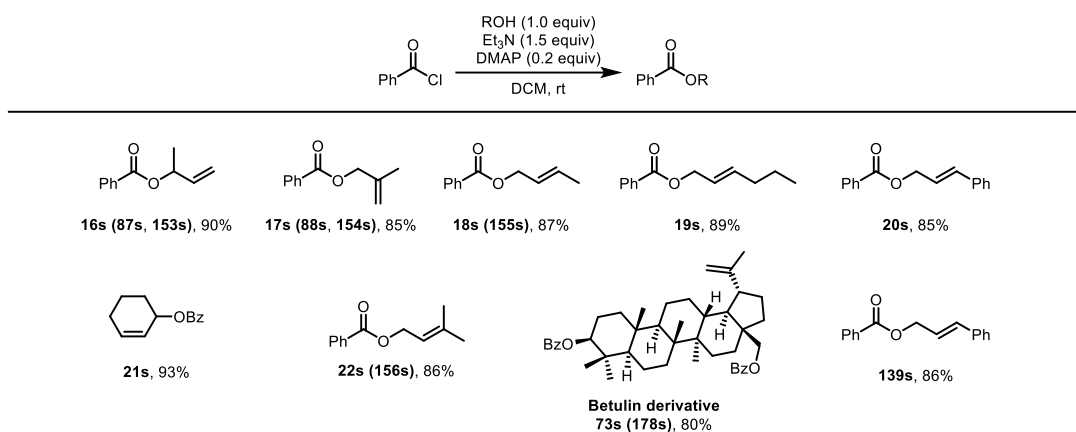

**Scheme S4.** Synthesis of compounds 16s to 22s, 73s, 139s

To a solution of alcohol (10.0 mmol, 1.0 equiv), 4-dimethylaminopyridine (DMAP) (2.0 mmol, 0.2 equiv) and Et<sub>3</sub>N (15.0 mmol, 1.5 equiv) in DCM (50.0 mL) was added benzoyl chloride (12.0 mmol, 1.2 equiv) at 0 °C. Stir the reaction mixture for 6 h. The reaction mixture was poured into H<sub>2</sub>O (75.0 mL) and extracted with CH<sub>2</sub>Cl<sub>2</sub> (3 x 50 mL). The organic phase was dried over anhydrous Na<sub>2</sub>SO<sub>4</sub>, filtered and concentrated in vacuo. The resulting residue was purified by silica gel column chromatography (eluted with Petroleum ether/EtOAc (v/v 100:1)) to afford compounds **16s to 22s, 73s, 139s**.<sup>2,3</sup>

### 3.3 Synthesis of compounds 25s, 26s, 161s

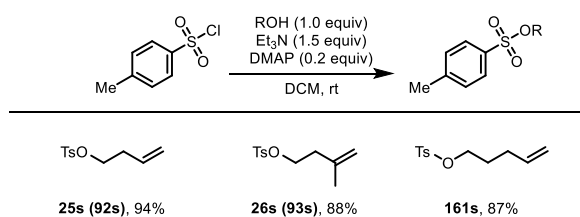

**Scheme S5.** Synthesis of compounds 25s, 26s, 161s

To a solution of alcohol (10.0 mmol, 1.0 equiv), 4-dimethylaminopyridine (DMAP) (2.0 mmol, 0.2 equiv) and Et<sub>3</sub>N (15.0 mmol, 1.5 equiv) in DCM (50.0 mL) was added *p*-toluenesulfonyl chloride (12.0 mmol, 1.2 equiv) at 0 °C. Stir the reaction mixture for 6 h. The reaction mixture was poured into H<sub>2</sub>O (75.0 mL) and extracted with CH<sub>2</sub>Cl<sub>2</sub>

(3 x 50 mL). The organic phase was dried over anhydrous Na<sub>2</sub>SO<sub>4</sub>, filtered and concentrated in vacuo. The resulting residue was purified by silica gel column chromatography (eluted with Petroleum ether/EtOAc (v/v 20:1)) to afford compounds **25s**, **26s**, **161s**.<sup>4</sup>

### 3.4 Synthesis of compound **27s**

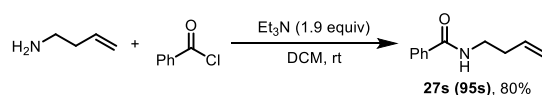

**Scheme S6.** Synthesis of compound **27s**

To a solution of but-3-en-1-amine (0.9 mmol, 0.9 equiv) and Et<sub>3</sub>N (1.9 mmol, 1.9 equiv) in DCM (5.0 mL) was added benzoyl chloride (1.0 mmol, 1.0 equiv) at 0 °C. Stir the reaction mixture for 24 h. The reaction mixture was poured into H<sub>2</sub>O (10.0 mL) and extracted with CH<sub>2</sub>Cl<sub>2</sub> (3 x 10 mL). The combined organic phase was washed with 10.0 mL of aq. KOH (0.2 M) and water. The organic phase was dried over anhydrous Na<sub>2</sub>SO<sub>4</sub>, filtered and concentrated in vacuo. The resulting residue was purified by silica gel column chromatography (eluted with hexane/acetone (v/v 5:1)) to afford compound **27s** in 80% yield (0.126 g).<sup>5</sup>

### 3.5 Synthesis of compound **28s**

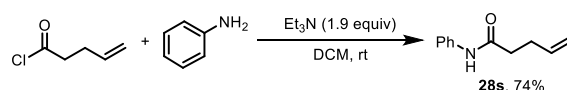

**Scheme S7.** Synthesis of compound **28s**

To a solution of aniline (0.9 mmol, 0.9 equiv) and Et<sub>3</sub>N (1.9 mmol, 1.9 equiv) in DCM (5.0 mL) was added 4-pentenoyl chloride (1.0 mmol, 1.0 equiv) at 0 °C. Stir the reaction mixture for 24 h. The reaction mixture was poured into H<sub>2</sub>O (10.0 mL) and extracted

with CH<sub>2</sub>Cl<sub>2</sub> (3 x 10 mL). The combined organic phase was washed with 10.0 mL of aq. KOH (0.2 M) and water. The organic phase was dried over anhydrous Na<sub>2</sub>SO<sub>4</sub>, filtered and concentrated in vacuo. The resulting residue was purified by silica gel column chromatography (eluted with hexane/acetone (v/v 5:1)) to afford compound **28s** in 74% yield (0.116 g).<sup>5</sup>

### 3.6 Synthesis of compounds **29s**, **30s**, **47s**, **159s**

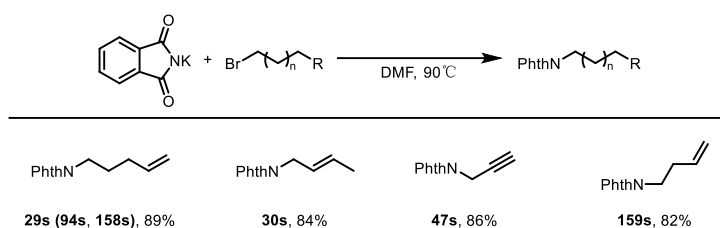

**Scheme S8.** Synthesis of compounds **29s**, **30s**, **47s**, **159s**

To a solution of alkyl bromide (19.6 mmol, 1.0 equiv) in DMF (23.0 mL) was added potassium phthalimide (21.6 mmol, 1.1 equiv). The reaction mixture was heated to 90 °C for 16 h. After been cooled to room temperature, the reaction mixture was poured into H<sub>2</sub>O (100.0 mL) and extracted with CH<sub>2</sub>Cl<sub>2</sub> (3 x 50 mL). The organic phase was dried over anhydrous Na<sub>2</sub>SO<sub>4</sub>, filtered and concentrated in vacuo. The resulting residue was purified by silica gel column chromatography (eluted with Petroleum ether/EtOAc (v/v 5:1)) to afford compounds **29s**, **30s**, **47s**, **159s**.<sup>6</sup>

### 3.7 Synthesis of compound **31s**

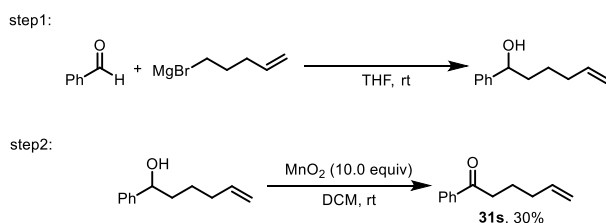

**Scheme S9.** Synthesis of compound **31s**

To a solution of benzaldehyde (10.0 mmol, 1.0 equiv) in THF (30.0 mL) was added at 0 °C pent-4-en-1-ylmagnesium bromide (0.5 M in THF, 15.0 mmol, 1.5 equiv). Stir the reaction mixture for 2 h, saturated ammonium chloride (25.0 mL) was added at 0 °C and the reaction was extracted with EtOAc (3 x 25 mL). The organic phase was washed with brine (1 x 40 mL), dried over anhydrous Na<sub>2</sub>SO<sub>4</sub>, filtered and concentrated in vacuo. The resulting residue was purified by silica gel column chromatography (eluted with Petroleum ether/EtOAc (v/v 50:1)) to afford  $\alpha$ -4-penten-1-yl Benzenemethanol in 55% yield (0.98 g).

To a solution of  $\alpha$ -4-penten-1-yl Benzenemethanol (5.6 mmol, 1.0 equiv) in DCM (120.0 mL) was added MnO<sub>2</sub> (56.0 mmol, 10.0 equiv). The reaction was allowed to stir overnight at room temperature. The resulting slurry was filtered through celite, and the celite was washed with Et<sub>2</sub>O. Solvent was removed in vacuo to afford compound **31s** in 30% yield (0.29 g).<sup>7</sup>

### 3.8 Synthesis of compounds **33s** and **34s**

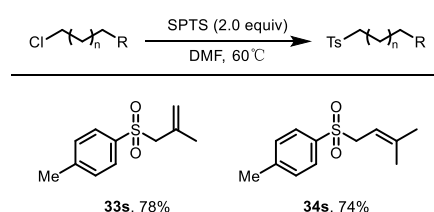

**Scheme S10.** Synthesis of compounds **33s** and **34s**

To a solution of chlorinated hydrocarbons (28.0 mmol, 1.0 equiv) in DMF (40.0 mL) was added sodium *p*-toluene sulfinate (SPTS) (56.0 mmol, 2.0 equiv). The reaction mixture was heated to 60 °C for 3 h. After been cooled to room temperature, the reaction mixture was poured into H<sub>2</sub>O (75.0 mL) and extracted with CH<sub>2</sub>Cl<sub>2</sub> (3 x 50 mL). The combined organic phase was washed with 100.0 mL of aq. KOH (0.2 M) and water. The organic phase was dried over anhydrous Na<sub>2</sub>SO<sub>4</sub>, filtered and concentrated in vacuo.

The resulting residue was purified by silica gel column chromatography (eluted with Petroleum ether/EtOAc (v/v 20:1)) to afford compounds **33s** and **34s**.<sup>8</sup>

### 3.9 Synthesis of compound 35s

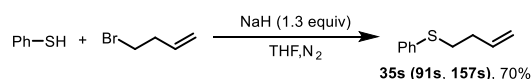

**Scheme S11.** Synthesis of compound 35s

To a solution of benzenethiol (15.0 mmol, 1.0 equiv) in THF (70.0 mL), NaH (19.5 mmol, 1.3 equiv) was added portionwise at 0 °C under N<sub>2</sub>. The resulting mixture was stirred for 15 minutes at 0 °C, followed by addition of 4-bromo-1-butene (18.0 mmol, 1.2 equiv). Stir the reaction mixture for 24 h at room temperature. The reaction was quenched by slow addition of MeOH (25.0 mL) and then H<sub>2</sub>O (25.0 mL). The reaction was extracted with EtOAc (3 x 25 mL). The organic phase was washed with brine (1 x 40 mL), dried over anhydrous Na<sub>2</sub>SO<sub>4</sub>, filtered and concentrated in vacuo. The resulting residue was purified by silica gel column chromatography (eluted with Petroleum ether/EtOAc (v/v 50:1)) to afford compound **35s** in 70% yield (1.72 g).<sup>9</sup>

### 3.10 Synthesis of compounds 48s, 160s, 179s

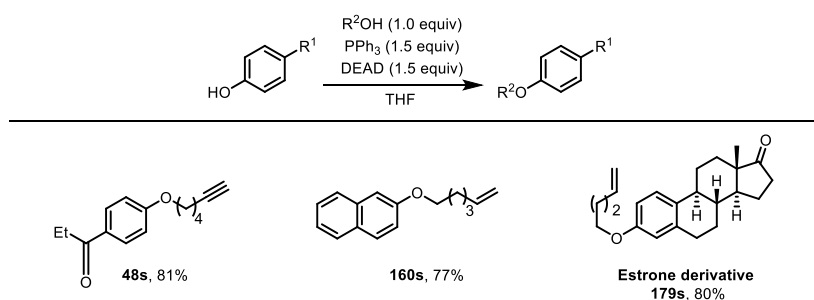

**Scheme S12.** Synthesis of compounds 48s, 160s, 179s

To a solution of phenols (28.6 mmol, 1.2 equiv), alcohol (23.8 mmol, 1.0 equiv) in THF(100.0 mL) was added PPh<sub>3</sub>(35.7 mmol, 1.5 equiv) at room temperature. Then

diethyl azodicarboxylate (DEAD) (35.7 mmol, 1.5 equiv) was added slowly at 0 °C. Stir the reaction mixture for 24 h at room temperature. The reaction mixture was poured into H<sub>2</sub>O (100.0 mL) and extracted with EtOAc (3 x 50 mL). The organic phase was dried over anhydrous Na<sub>2</sub>SO<sub>4</sub>, filtered and concentrated in vacuo. The resulting residue was purified by silica gel column chromatography (eluted with Petroleum ether/EtOAc (v/v 100:1)) to afford compounds **48s**, **160s**, **179s**.<sup>10</sup>

### 3.11 Synthesis of compounds **52s** and **53s**

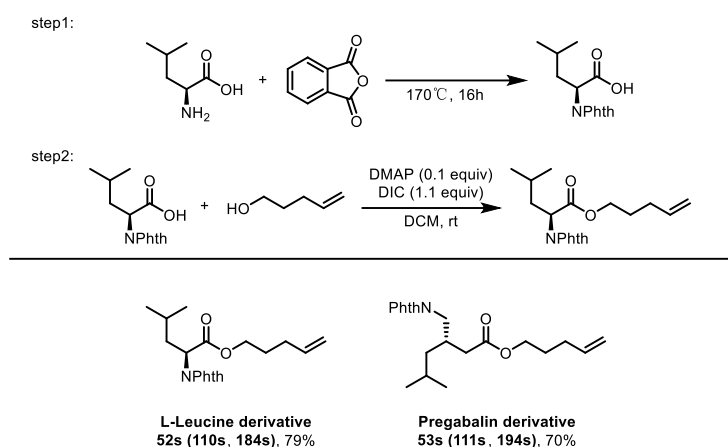

**Scheme S13.** Synthesis of compounds **52s** and **53s**

L-Leucine (27.0 mmol, 1.0 equiv) was added to phthalic anhydride (27.0 mmol, 1.0 equiv) at room temperature. The mixture was heated to 170 °C for 6 h. After been cooled to room temperature, the reaction mixture was poured into H<sub>2</sub>O (50.0 mL) and extracted with CH<sub>2</sub>Cl<sub>2</sub> (3 x 50 mL). The organic phase was dried over anhydrous Na<sub>2</sub>SO<sub>4</sub>, filtered and concentrated in vacuo to afford corresponding acid. To a solution of acid (10.0 mmol, 1.0 equiv) in DCM (50.0 mL) was added *N*, *N'*-diisopropylcarbodiimide (DIC) (11.0 mmol, 1.1 equiv), 4-dimethylaminopyridine (DMAP) (1.0 mmol, 0.1 equiv) and 4-penten-1-ol (10.0 mmol, 1.0 equiv). Stir the reaction mixture for 24 h. The reaction mixture was poured into H<sub>2</sub>O (100.0 mL) and extracted with CH<sub>2</sub>Cl<sub>2</sub> (3 x 50 mL). The combined organic phase was washed with 100.0 mL of aq. KOH (0.2 M) and water. The organic phase was dried over anhydrous



Na<sub>2</sub>SO<sub>4</sub>, filtered and concentrated in vacuo. The resulting residue was purified by silica gel column chromatography (eluted with Petroleum ether/EtOAc (v/v 10:1)) to afford compound **52s** in 79% yield (2.6 g). According to the same method above can be obtained **53s** in 70% yield (2.50g).<sup>1, 11</sup>

### 3.12 Synthesis of compound 58s

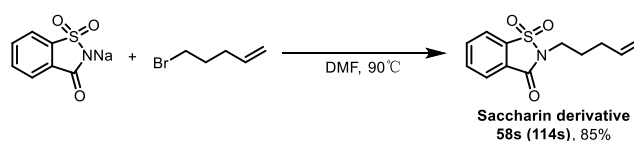

**Scheme S14.** Synthesis of compound 58s

To a solution of 5-bromopentene (19.6 mmol, 1.0 equiv) in DMF (23.0 mL) was added sodium saccharine (21.6 mmol, 1.1 equiv). The reaction mixture was heated to 90 °C for 16 h. After been cooled to room temperature, the reaction mixture was poured into H<sub>2</sub>O (100.0 mL) and extracted with CH<sub>2</sub>Cl<sub>2</sub> (3 x 50 mL). The organic phase was dried over anhydrous Na<sub>2</sub>SO<sub>4</sub>, filtered and concentrated in vacuo. The resulting residue was purified by silica gel column chromatography (eluted with Petroleum ether/EtOAc (v/v 5:1)) to afford compound **58s** in 85% yield (4.20 g).<sup>6</sup>

### 3.13 Synthesis of compound 164s

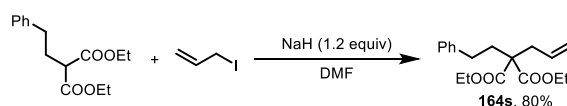

**Scheme S15.** Synthesis of compound 164s

To a solution of 1,3-diethyl 2-(2 phenylethyl)propanedioate (5.0 mmol, 1.0 equiv) in DMF (5.0 mL), NaH (6.0 mmol, 1.2 equiv) was added portionwise at 0 °C. The resulting mixture was stirred for 30 minutes at 0 °C, followed by addition of 3-iodo-1-propene (7.5mmol, 1.5 equiv). The mixture was warmed to 22 °C and allowed to stir at

that temperature for 3 h. The reaction was quenched with saturated aq.  $\text{NH}_4\text{Cl}$  (40.0 mL) and extracted with EtOAc ( $3 \times 40$  mL). The organic phase was washed with brine ( $1 \times 40$  mL), dried over anhydrous  $\text{Na}_2\text{SO}_4$ , filtered and concentrated in vacuo. The resulting residue was purified by silica gel column chromatography (eluted with hexane /EtOAc (v/v 20:1)) to afford compound **164s** in 80% yield (1.21g).<sup>12</sup>

### 3.14 Synthesis of compound 200s

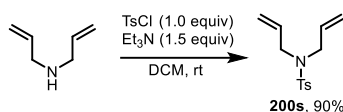

**Scheme S16.** Synthesis of compound 200s

To a solution of diallylamine (10.0 mmol, 1.0 equiv) and Et<sub>3</sub>N (15.0 mmol, 1.5 equiv) in DCM (50.0 mL) was added *p*-toluenesulfonyl chloride (10.0 mmol, 1.0 equiv) at 0 °C. Stir the reaction mixture for 6 h. The reaction mixture was poured into H<sub>2</sub>O (100.0 mL) and extracted with CH<sub>2</sub>Cl<sub>2</sub> ( $3 \times 50$  mL). The organic phase was dried over anhydrous  $\text{Na}_2\text{SO}_4$ , filtered and concentrated in vacuo. The resulting residue was purified by silica gel column chromatography (eluted with Petroleum ether/EtOAc (v/v 5:1)) to afford compound **200s** in 90% yield (0.90g).<sup>13</sup>

### 3.15 Synthesis of compound 201s

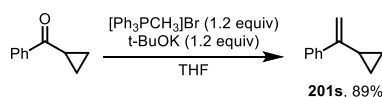

**Scheme S17.** Synthesis of compound 201s

To a solution of methyltriphenylphosphonium bromide (6.0 mmol, 1.2 equiv) in THF (13.0 mL), *t*-BuOK (6.0 mmol, 1.2 equiv) was added dropwise at 0 °C under N<sub>2</sub>. The resulting mixture was stirred for 1 h at 0 °C, followed by addition of cyclopropyl phenyl

ketone (5.0 mmol, 1.0 equiv). Stir the reaction mixture for 3 h at room temperature. The reaction mixture was poured into H<sub>2</sub>O (100.0 mL) and extracted with EtOAc (3 x 50 mL). The organic phase was dried over anhydrous Na<sub>2</sub>SO<sub>4</sub>, filtered and concentrated in vacuo. The resulting residue was purified by silica gel column chromatography (eluted with Petroleum ether/EtOAc (v/v 100:1)) to afford compound **201s** in 89% yield (0.64 g).<sup>14</sup>

#### 4. Reaction optimization for dichlorination and nitration of olefin **1**

All screening reactions were carried out at a 0.1 mmol scale in a 4 mL glass vial (Thermo Scientific, National B7999-2) sealed with PTEF cap and stirred on bench top. A 24 W LED light was positioned 5 cm aside from the reaction vials if necessary.

Olefin **1** (0.1 mmol, 1.0 equiv) and NaNO<sub>2</sub> were first dispersed in specific solvent and stirred for 1 min at room temperature. Specified acid was then added and the resulting mixture was vigorously stirred at room temperature (30 °C) with or without light irradiation for several hours. After removal of the solvent *in vacuo*, the resulting residue was dissolved in 1 mL of CDCl<sub>3</sub> along with Cl<sub>2</sub>CHCHCl<sub>2</sub> (20 μL) as an internal standard for <sup>1</sup>H-NMR analysis. The composition of reaction mixture was analyzed based on the olefins hydrogen peak at 7.03 ppm (d, *J* = 13.4 Hz, 1H) for compound **2**, and chlorinated hydrocarbon α-hydrogen peak 3.67 ppm (dd, *J* = 11.3, 7.8 Hz, 1H) for compound **3**.

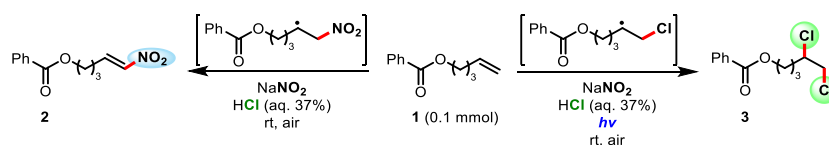

| Entry | reagents (equiv), light, time (h)                        | solvent (mL) | <b>2</b> % | <b>3</b> % |
|-------|----------------------------------------------------------|--------------|------------|------------|
| 1     | NaNO <sub>2</sub> (2.5), HCOOH (3.0), 2 h                | DCM (1.0)    | 31         | 0          |
| 2     | NaNO <sub>2</sub> (2.5), CH <sub>3</sub> COOH (3.0), 2 h | DCM (1.0)    | <5         | 0          |

|    |                                                                     |                          |                          |                          |
|----|---------------------------------------------------------------------|--------------------------|--------------------------|--------------------------|
| 3  | NaNO <sub>2</sub> (2.5), CF <sub>3</sub> COOH (3.0), 2 h            | DCM (1.0)                | 10                       | 0                        |
| 4  | NaNO <sub>2</sub> (2.5), H <sub>2</sub> SO <sub>4</sub> (3.0), 2 h  | DCM (1.0)                | <5                       | 0                        |
| 5  | NaNO <sub>2</sub> (2.5), HCl (25 $\mu$ L), 2 h                      | DCM (1.0)                | 96<br>(89 <sup>b</sup> ) | <5                       |
| 6  | NaNO <sub>2</sub> (2.5), HCl (25 $\mu$ L), 2 h                      | No solvent               | 97<br>(89 <sup>b</sup> ) | <5                       |
| 7  | NaNO <sub>2</sub> (1.0), HCl (25 $\mu$ L), 2 h                      | DCM (1.0)                | 82                       | <5                       |
| 8  | NaNO <sub>2</sub> (1.0), HCl (40 $\mu$ L), 2 h                      | DCM (1.0)                | 43                       | 7                        |
| 9  | NaNO <sub>2</sub> (1.0), HCl (50 $\mu$ L), 2 h                      | DCM (1.0)                | 32                       | 18                       |
| 10 | NaNO <sub>2</sub> (1.0), HCl (50 $\mu$ L), 2 h,<br>in darkness      | DCM (1.0)                | 40                       | 10                       |
| 11 | NaNO <sub>2</sub> (1.0), HCl (50 $\mu$ L),<br>Blue LEDs (24 W), 6 h | DCM (1.0)                | 11<br>(5 <sup>b</sup> )  | 88<br>(69 <sup>b</sup> ) |
| 12 | NaNO <sub>2</sub> (1.0), HCl (50 $\mu$ L),<br>Blue LEDs (24 W), 6 h | DCM (0.5)                | 23                       | 55                       |
| 13 | NaNO <sub>2</sub> (1.0), HCl (50 $\mu$ L),<br>Blue LEDs (24 W), 6 h | DCM (1.5)                | 10                       | 74                       |
| 14 | NaNO <sub>2</sub> (1.0), HCl (50 $\mu$ L),<br>Blue LEDs (24 W), 6 h | DCM (2.0)                | 10                       | 72                       |
| 15 | NaNO <sub>2</sub> (1.0), HCl (50 $\mu$ L),<br>Blue LEDs (24 W), 6 h | CHCl <sub>3</sub> (1.0)  | 8                        | 50                       |
| 16 | NaNO <sub>2</sub> (1.0), HCl (50 $\mu$ L),<br>Blue LEDs (24 W), 6 h | DCE (1.0)                | 7                        | 45                       |
| 17 | NaNO <sub>2</sub> (1.0), HCl (50 $\mu$ L),<br>Blue LEDs (24 W), 6 h | TCE (1.0)                | 13                       | 63                       |
| 18 | NaNO <sub>2</sub> (1.0), HCl (50 $\mu$ L),<br>Blue LEDs (24 W), 6 h | CH <sub>3</sub> CN (1.0) | <5                       | 10                       |
| 19 | NaNO <sub>2</sub> (1.0), HCl (50 $\mu$ L),<br>Blue LEDs (24 W), 6 h | Ph-Cl (1.0)              | <5                       | 65                       |

|    |                                                                       |                                       |    |    |
|----|-----------------------------------------------------------------------|---------------------------------------|----|----|
| 20 | NaNO <sub>2</sub> (1.0), HCl (50 $\mu$ L),<br>Blue LEDs (24 W), 6 h   | CH <sub>2</sub> Br <sub>2</sub> (1.0) | 8  | 43 |
| 21 | NaNO <sub>2</sub> (1.0), HCl (50 $\mu$ L),<br>Blue LEDs (24 W), 6 h   | H <sub>2</sub> O (1.0)                | <5 | <5 |
| 22 | NaNO <sub>2</sub> (1.0), HCl (25 $\mu$ L),<br>Blue LEDs (24 W), 6 h   | DCM (1.0)                             | 14 | 36 |
| 23 | NaNO <sub>2</sub> (1.0), HCl (40 $\mu$ L),<br>Blue LEDs (24 W), 6 h   | DCM (1.0)                             | 10 | 71 |
| 24 | NaNO <sub>2</sub> (0.3), HCl (50 $\mu$ L),<br>Blue LEDs (24 W), 6 h   | DCM (1.0)                             | <5 | <5 |
| 25 | NaNO <sub>2</sub> (0.5), HCl (50 $\mu$ L),<br>Blue LEDs (24 W), 6 h   | DCM (1.0)                             | <5 | 12 |
| 26 | NaNO <sub>2</sub> (0.8), HCl (50 $\mu$ L),<br>Blue LEDs (24 W), 6 h   | DCM (1.0)                             | 10 | 72 |
| 27 | NaNO <sub>2</sub> (1.0), HCl (50 $\mu$ L),<br>White CFL (24 W), 6 h   | DCM (1.0)                             | 7  | 54 |
| 28 | NaNO <sub>2</sub> (1.0), HCl (50 $\mu$ L),<br>UV (365 nm) (24 W), 6 h | DCM (1.0)                             | 8  | 57 |
| 29 | NaNO <sub>2</sub> (1.0), HCl (50 $\mu$ L),<br>UV (254 nm) (24 W), 6 h | DCM (1.0)                             | 6  | 50 |
| 30 | NaNO <sub>2</sub> (1.0), HCl (50 $\mu$ L),<br>Green LEDs (24 W), 6 h  | DCM (1.0)                             | 8  | 58 |
| 31 | NaNO <sub>2</sub> (1.0), HCl (50 $\mu$ L),<br>Red LEDs (24 W), 6 h    | DCM (1.0)                             | <5 | 23 |
| 32 | HCl (50 $\mu$ L), Blue LEDs (24 W), 6 h                               | DCM (1.0)                             | 0  | 0  |

a) All screening reactions were carried out on a 0.1 mmol scale at 30 °C and yields are based on <sup>1</sup>H-NMR analysis. HCl (aq. 37% in water). b) Isolated yield.

**Table S1.** Reaction optimization for the dichlorination and nitration of olefin **1**

## 5. General procedures and substrate scope of dichlorination reactions

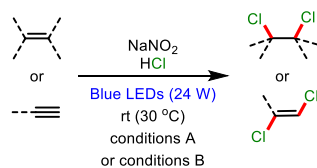

**Scheme S18.** General procedures and substrate scope of dichlorination reactions

**General conditions A:** Substrate alkenes or alkynes (0.2 mmol, 1.0 equiv), NaNO<sub>2</sub> (0.2 mmol, 1.0 equiv) and HCl (100  $\mu$ L, aq. 37% in water) were dispersed in CH<sub>2</sub>Cl<sub>2</sub> (2.0 mL) in a 4 mL glass vial at room temperature. The reaction vial was sealed with a PTEF cap and the reaction mixture vigorously stirred at 30 °C under the 24 W blue LEDs irradiation for 12 h (It is worth noting that 24 W blue LEDs was positioned 5 cm aside from the reaction vials.). Then, the reaction mixture was extracted with CH<sub>2</sub>Cl<sub>2</sub> (3  $\times$  2 mL). The combined organic layer was dried over anhydrous Na<sub>2</sub>SO<sub>4</sub>, filtered and concentrated. The residue was purified by chromatography on silica gel to afford the desired dichlorination products.

**General conditions B:** Substrate alkenes or alkynes (0.2 mmol, 1.0 equiv), NaNO<sub>2</sub> (0.2 mmol, 1.0 equiv) and HCl (100  $\mu$ L, aq. 37% in water) were dispersed in PhCl (2.0 mL) in a 4 mL glass vial at room temperature. The reaction vial was sealed with a PTEF cap and the reaction mixture vigorously stirred at 30 °C under the 24 W blue LEDs irradiation for 12 h (It is worth noting that 24 W blue LEDs was positioned 5 cm aside from the reaction vials.). Then, the reaction mixture was extracted with CH<sub>2</sub>Cl<sub>2</sub> (3  $\times$  2 mL). The combined organic layer was dried over anhydrous Na<sub>2</sub>SO<sub>4</sub>, filtered and concentrated. The residue was purified by chromatography on silica gel to afford the desired dichlorination products.

### 5.1 Visible-light-induced vicinal dichlorination of alkenes

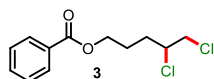

Compound **3** was isolated in 69% yield following the general conditions A (crude  $^1\text{H}$  NMR yield: 88%).  $^1\text{H}$  NMR (500 MHz,  $\text{CDCl}_3$ )  $\delta$  8.04 (d,  $J = 7.3$  Hz, 2H), 7.57 (t,  $J = 7.4$  Hz, 1H), 7.45 (t,  $J = 7.7$  Hz, 2H), 4.38 (td,  $J = 6.3, 2.9$  Hz, 2H), 4.15 – 4.06 (m, 1H), 3.81 (dd,  $J = 11.3, 5.0$  Hz, 1H), 3.67 (dd,  $J = 11.3, 7.8$  Hz, 1H), 2.24 – 2.17 (m, 1H), 2.12 – 2.04 (m, 1H), 1.97 – 1.83 (m, 2H).<sup>15</sup>

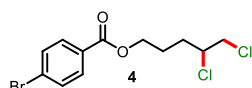

Compound **4** was isolated in 70% yield following the general conditions A.  $^1\text{H}$  NMR (500 MHz,  $\text{CDCl}_3$ )  $\delta$  7.90 (d,  $J = 8.5$  Hz, 2H), 7.59 (d,  $J = 8.5$  Hz, 2H), 4.37 (td,  $J = 6.3, 2.4$  Hz, 2H), 4.14 – 4.07 (m, 1H), 3.81 (dd,  $J = 11.3, 4.9$  Hz, 1H), 3.66 (dd,  $J = 11.3, 7.9$  Hz, 1H), 2.23 – 2.17 (m, 1H), 2.12 – 2.03 (m, 1H), 1.97 – 1.82 (m, 2H).<sup>15</sup>

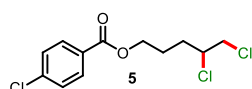

Compound **5** was isolated in 70% yield following the general conditions A.  $^1\text{H}$  NMR (500 MHz,  $\text{CDCl}_3$ )  $\delta$  7.97 (d,  $J = 8.3$  Hz, 2H), 7.42 (d,  $J = 8.3$  Hz, 2H), 4.37 (td,  $J = 5.9, 2.0$  Hz, 2H), 4.15 – 4.07 (m, 1H), 3.80 (dd,  $J = 11.3, 4.7$  Hz, 1H), 3.66 (dd,  $J = 11.0, 8.1$  Hz, 1H), 2.24 – 2.16 (m, 1H), 2.12 – 2.01 (m, 1H), 1.98 – 1.82 (m, 2H).  $^{13}\text{C}$  NMR (126 MHz,  $\text{CDCl}_3$ )  $\delta$  165.78, 139.61, 131.09, 128.90, 128.70, 64.41, 60.47, 48.02, 31.81, 25.36. HRMS Calcd for  $\text{C}_{12}\text{H}_{13}\text{Cl}_3\text{NaO}_2$  [ $\text{M}+\text{Na}^+$ ]: 316.9873; Found: 316.9874.

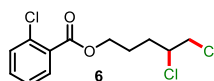

Compound **6** was isolated in 71% yield following the general conditions A.  $^1\text{H}$  NMR (500 MHz,  $\text{CDCl}_3$ )  $\delta$  7.82 (d,  $J = 7.7$  Hz, 1H), 7.47 – 7.40 (m, 2H), 7.32 (t,  $J = 7.4$  Hz, 1H), 4.43 – 4.35 (m, 2H), 4.14 – 4.07 (m, 1H), 3.80 (dd,  $J = 11.3, 5.0$  Hz, 1H), 3.66 (dd,  $J = 11.3, 7.8$  Hz, 1H), 2.26 – 2.20 (m, 1H), 2.12 – 2.04 (m, 1H), 1.97 – 1.84 (m, 2H).  $^{13}\text{C}$  NMR (126 MHz,  $\text{CDCl}_3$ )  $\delta$  165.90, 133.75, 132.71, 131.52, 131.21, 130.31, 126.75, 64.75, 60.55, 48.09, 31.91, 25.35. HRMS Calcd for  $\text{C}_{12}\text{H}_{14}\text{Cl}_3\text{O}_2$  [ $\text{M}+\text{H}^+$ ]: 295.0054; Found: 295.0054.

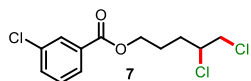

Compound **7** was isolated in 72% yield following the general conditions A. **<sup>1</sup>H NMR** (500 MHz, CDCl<sub>3</sub>) δ 8.01 (s, 1H), 7.92 (d, *J* = 7.8 Hz, 1H), 7.53 (d, *J* = 8.0 Hz, 1H), 7.39 (t, *J* = 7.9 Hz, 1H), 4.43 – 4.34 (m, 2H), 4.13 – 4.08 (m, 1H), 3.81 (dd, *J* = 11.3, 4.9 Hz, 1H), 3.67 (dd, *J* = 11.3, 7.9 Hz, 1H), 2.24 – 2.17 (m, 1H), 2.11 – 2.04 (m, 1H), 1.97 – 1.82 (m, 2H). **<sup>13</sup>C NMR** (126 MHz, CDCl<sub>3</sub>) δ 165.43, 134.70, 133.18, 132.00, 129.87, 129.78, 127.82, 64.57, 60.46, 48.02, 31.78, 25.36. **HRMS** Calcd for C<sub>12</sub>H<sub>13</sub>Cl<sub>3</sub>NaO<sub>2</sub> [M+Na<sup>+</sup>]: 316.9873; Found: 316.9874.

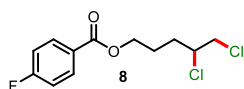

Compound **8** was isolated in 73% yield following the general conditions A. **<sup>1</sup>H NMR** (500 MHz, CDCl<sub>3</sub>) δ 8.05 (dd, *J* = 8.4, 5.6 Hz, 2H), 7.11 (t, *J* = 8.5 Hz, 2H), 4.40 – 4.32 (m, 2H), 4.14 – 4.05 (m, 1H), 3.81 (dd, *J* = 11.3, 4.9 Hz, 1H), 3.66 (dd, *J* = 11.3, 7.9 Hz, 1H), 2.24 – 2.16 (m, 1H), 2.12 – 2.04 (m, 1H), 1.96 – 1.83 (m, 2H). **<sup>13</sup>C NMR** (126 MHz, CDCl<sub>3</sub>) δ 165.94 (d, *J* = 254.0 Hz), 165.69 (s), 132.25 (d, *J* = 9.3 Hz), 126.52 (d, *J* = 3.0 Hz), 115.71 (d, *J* = 22.0 Hz), 64.31, 60.50, 48.04, 31.85, 25.40. **<sup>19</sup>F NMR** (471 MHz, CDCl<sub>3</sub>) δ -105.54 - -105.62 (m, 1F). **HRMS** Calcd for C<sub>12</sub>H<sub>13</sub>Cl<sub>2</sub>FNao<sub>2</sub> [M+Na<sup>+</sup>]: 301.0169; Found: 301.0169.

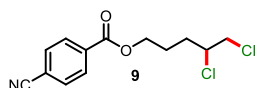

Compound **9** was isolated in 70% yield following the general conditions A. **<sup>1</sup>H NMR** (500 MHz, CDCl<sub>3</sub>) δ 8.13 (d, *J* = 8.4 Hz, 2H), 7.75 (d, *J* = 8.4 Hz, 2H), 4.45 - 4.38 (m, 2H), 4.13 - 4.07 (m, 1H), 3.81 (dd, *J* = 11.3, 4.9 Hz, 1H), 3.66 (dd, *J* = 11.3, 8.1 Hz, 1H), 2.24 - 2.17 (m, 1H), 2.13 - 2.05 (m, 1H), 1.98 - 1.83 (m, 2H). **<sup>13</sup>C NMR** (126 MHz, CDCl<sub>3</sub>) δ 164.99, 134.05, 132.39, 130.20, 118.05, 116.62, 64.99, 60.33, 47.94, 31.73, 25.28. **HRMS** Calcd for C<sub>13</sub>H<sub>13</sub>Cl<sub>2</sub>NNao<sub>2</sub> [M+Na<sup>+</sup>]: 308.0216; Found: 308.0209.

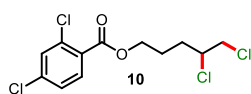

Compound **10** was isolated in 71% yield following the general conditions A. **<sup>1</sup>H NMR** (500 MHz, CDCl<sub>3</sub>) δ 7.80 (d, *J* = 8.4 Hz, 1H), 7.47 (s, 1H), 7.31 (d, *J* = 8.3 Hz, 1H),



4.42 – 4.34 (m, 2H), 4.12 – 4.06 (m, 1H), 3.80 (dd,  $J = 11.3, 4.9$  Hz, 1H), 3.65 (dd,  $J = 11.2, 8.0$  Hz, 1H), 2.25 – 2.18 (m, 1H), 2.11 – 2.03 (m, 1H), 1.96 – 1.82 (m, 2H).  $^{13}\text{C}$  NMR (126 MHz,  $\text{CDCl}_3$ )  $\delta$  164.96, 138.53, 134.97, 132.66, 131.17, 128.46, 127.20, 64.96, 60.45, 48.01, 31.85, 25.28. HRMS Calcd for  $\text{C}_{12}\text{H}_{12}\text{Cl}_4\text{NaO}_2$  [ $\text{M}+\text{Na}^+$ ]: 350.9484; Found: 350.9483.

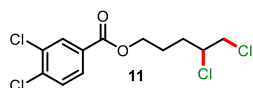

Compound **11** was isolated in 72% yield following the general conditions A.  $^1\text{H}$  NMR (500 MHz,  $\text{CDCl}_3$ )  $\delta$  8.10 (s, 1H), 7.85 (d,  $J = 8.4$  Hz, 1H), 7.52 (d,  $J = 8.3$  Hz, 1H), 4.38 (t,  $J = 6.2$  Hz, 2H), 4.13 – 4.08 (m, 1H), 3.81 (dd,  $J = 11.3, 4.9$  Hz, 1H), 3.66 (dd,  $J = 11.3, 8.0$  Hz, 1H), 2.23 – 2.15 (m, 1H), 2.11 – 2.04 (m, 1H), 1.96 – 1.82 (m, 2H).  $^{13}\text{C}$  NMR (126 MHz,  $\text{CDCl}_3$ )  $\delta$  164.75, 137.80, 133.11, 131.63, 130.70, 130.08, 128.75, 64.76, 60.38, 47.96, 31.72, 25.31. HRMS Calcd for  $\text{C}_{12}\text{H}_{12}\text{Cl}_4\text{NaO}_2$  [ $\text{M}+\text{Na}^+$ ]: 350.9484; Found: 350.9475.

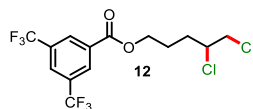

Compound **12** was isolated in 70% yield following the general conditions A.  $^1\text{H}$  NMR (500 MHz,  $\text{CDCl}_3$ )  $\delta$  8.48 (s, 2H), 8.07 (s, 1H), 4.46 (t,  $J = 6.5$  Hz, 2H), 4.15 – 4.08 (m, 1H), 3.82 (dd,  $J = 11.3, 4.8$  Hz, 1H), 3.67 (dd,  $J = 11.3, 8.2$  Hz, 1H), 2.27 – 2.19 (m, 1H), 2.17 – 2.09 (m, 1H), 2.01 – 1.93 (m, 1H), 1.91 – 1.83 (m, 1H).  $^{13}\text{C}$  NMR (126 MHz,  $\text{CDCl}_3$ )  $\delta$  163.99, 132.42, 132.39 (q,  $J = 34.1$  Hz), 129.87 (d,  $J = 3.3$  Hz), 126.69 – 126.45 (m), 124.07, 121.90, 65.37, 60.23, 47.85, 31.59, 25.25.  $^{19}\text{F}$  NMR (471 MHz,  $\text{CDCl}_3$ )  $\delta$  -63.01 (s, 6F). HRMS Calcd for  $\text{C}_{14}\text{H}_{12}\text{Cl}_2\text{F}_6\text{NaO}_2$  [ $\text{M}+\text{Na}^+$ ]: 419.0011; Found: 419.0001.

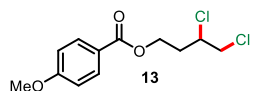

Compound **13** was isolated in 60% yield following the general conditions A.  $^1\text{H}$  NMR (500 MHz,  $\text{CDCl}_3$ )  $\delta$  7.99 (d,  $J = 8.9$  Hz, 2H), 6.93 (d,  $J = 8.9$  Hz, 2H), 4.57 – 4.52 (m, 1H), 4.49 – 4.43 (m, 1H), 4.29 – 4.24 (m, 1H), 3.88 – 3.83 (m, 4H), 3.74 (dd,  $J = 11.4, 7.5$  Hz, 1H), 2.55 – 2.47 (m, 1H), 2.17 – 2.09 (m, 1H).<sup>16</sup>

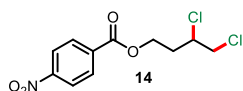

Compound **14** was isolated in 67% yield following the general conditions A. **<sup>1</sup>H NMR** (500 MHz, CDCl<sub>3</sub>) δ 8.30 (d, *J* = 8.9 Hz, 2H), 8.21 (d, *J* = 8.9 Hz, 2H), 4.67 – 4.60 (m, 1H), 4.60 – 4.53 (m, 1H), 4.29 – 4.21 (m, 1H), 3.87 (dd, *J* = 11.4, 4.8 Hz, 1H), 3.73 (dd, *J* = 11.4, 8.0 Hz, 1H), 2.62 – 2.53 (m, 1H), 2.22 – 2.13 (m, 1H).<sup>16</sup>

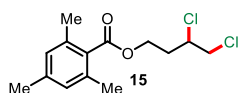

Compound **15** was isolated in 38% yield following the general conditions A. **<sup>1</sup>H NMR** (500 MHz, CDCl<sub>3</sub>) δ 6.86 (s, 2H), 4.59 – 4.54 (m, 1H), 4.51 – 4.45 (m, 1H), 4.26 – 4.20 (m, 1H), 3.82 (dd, *J* = 11.4, 4.2 Hz, 1H), 3.69 (dd, *J* = 11.1, 8.0 Hz, 1H), 2.55 – 2.48 (m, 1H), 2.30 (s, 3H), 2.29 (s, 6H), 2.09 – 2.02 (m, 1H). **<sup>13</sup>C NMR** (126 MHz, CDCl<sub>3</sub>) δ 170.03, 139.66, 135.27, 130.77, 128.60, 61.29, 57.48, 48.30, 34.45, 21.27, 19.97. **HRMS** Calcd for C<sub>14</sub>H<sub>18</sub>Cl<sub>2</sub>NaO<sub>2</sub> [M+Na<sup>+</sup>]: 311.0576; Found: 311.0576.

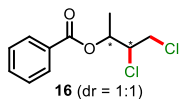

Compound **16** was isolated in 58% yield following the general conditions A (the recovery of starting material is 30%). **<sup>1</sup>H NMR** (500 MHz, CDCl<sub>3</sub>) δ 8.06 (t, *J* = 7.5 Hz, 2H), 7.67 – 7.56 (m, 1H), 7.55 – 7.38 (m, 2H), 5.73 – 5.59 (m, 0.46H), 5.58 – 5.45 (m, 0.40H), 4.36 (dd, *J* = 11.6, 6.0 Hz, 0.42H), 4.18 (dd, *J* = 9.7, 4.0 Hz, 0.43H), 3.97 – 3.66 (m, 2H), 1.51 (d, *J* = 6.3 Hz, 1.49H), 1.48 (d, *J* = 6.3 Hz, 1.49H). **<sup>13</sup>C NMR** (126 MHz, CDCl<sub>3</sub>) δ 165.50, 165.47, 133.49, 133.47, 129.89, 129.86, 128.64, 128.62, 70.50, 68.92, 63.38, 62.72, 44.98, 44.62, 17.52, 15.40. **HRMS** Calcd for C<sub>11</sub>H<sub>12</sub>Cl<sub>2</sub>NaO<sub>2</sub> [M+Na<sup>+</sup>]: 269.0107; Found: 269.0107.

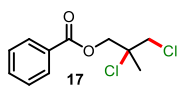

Compound **17** was isolated in 41% yield following the general conditions A (the recovery of starting material is 47%). **<sup>1</sup>H NMR** (500 MHz, CDCl<sub>3</sub>) δ 8.07 (d, *J* = 7.1 Hz, 2H), 7.60 (t, *J* = 7.4 Hz, 1H), 7.47 (t, *J* = 7.8 Hz, 2H), 4.55 (d, *J* = 1.9 Hz, 2H), 3.97

(d,  $J = 11.4$  Hz, 1H), 3.79 (d,  $J = 11.4$  Hz, 1H), 1.75 (s, 3H).  $^{13}\text{C}$  NMR (126 MHz,  $\text{CDCl}_3$ )  $\delta$  165.80, 133.55, 129.87, 129.61, 128.68, 68.32, 67.65, 50.00, 25.25. HRMS Calcd for  $\text{C}_{11}\text{H}_{12}\text{Cl}_2\text{NaO}_2$  [ $\text{M}+\text{Na}^+$ ]: 269.0107; Found: 269.0107.

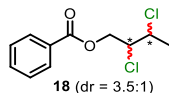

Compound **18** was isolated in 60% yield following the general conditions B (the recovery of starting material is 30%).  $^1\text{H}$  NMR (500 MHz,  $\text{CDCl}_3$ )  $\delta$  8.07 (d,  $J = 7.7$  Hz, 2H), 7.59 (t,  $J = 7.4$  Hz, 1H), 7.47 (t,  $J = 7.6$  Hz, 2H), 4.79 – 4.71 (m, 1H), 4.68 – 4.62 (m, 1H), 4.48 – 4.21 (m, 2H), 1.72 (d,  $J = 6.3$  Hz, 2H), 1.67 (d,  $J = 6.7$  Hz, 1H).  $^{13}\text{C}$  NMR (126 MHz,  $\text{CDCl}_3$ )  $\delta$  165.98, 133.49, 129.85, 129.56, 128.61, 65.70, 65.47, 63.09, 62.06, 56.84, 56.68, 22.24, 21.83. HRMS Calcd for  $\text{C}_{11}\text{H}_{12}\text{Cl}_2\text{NaO}_2$  [ $\text{M}+\text{Na}^+$ ]: 269.0107; Found: 269.0107.

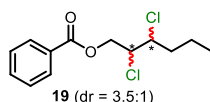

Compound **19** was isolated in 51% yield following the general conditions B (the recovery of starting material is 38%).  $^1\text{H}$  NMR (500 MHz,  $\text{CDCl}_3$ )  $\delta$  8.07 (d,  $J = 7.6$  Hz, 2H), 7.59 (t,  $J = 7.4$  Hz, 1H), 7.47 (t,  $J = 7.8$  Hz, 2H), 4.82 – 4.75 (m, 1H), 4.69 – 4.62 (m, 1H), 4.46 – 4.37 (m, 0.22H), 4.34 – 4.29 (m, 0.77H), 4.28 – 4.22 (m, 0.23H), 4.21 – 4.16 (m, 0.78H), 2.11 – 2.03 (m, 1H), 1.92 – 1.82 (m, 1H), 1.75 – 1.63 (m, 1H), 1.54 – 1.42 (m, 1H), 0.98 (t,  $J = 7.4$  Hz, 3H).  $^{13}\text{C}$  NMR (126 MHz,  $\text{CDCl}_3$ )  $\delta$  166.09, 133.54, 133.48, 129.88, 129.73, 129.66, 129.55, 128.63, 128.44, 65.86, 65.73, 62.20, 61.81, 61.74, 61.16, 37.24, 36.91, 19.96, 19.25, 13.79, 13.57. HRMS Calcd for  $\text{C}_{13}\text{H}_{16}\text{Cl}_2\text{NaO}_2$  [ $\text{M}+\text{Na}^+$ ]: 297.0420; Found: 297.0421.

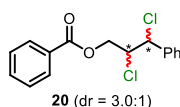

Compound **20** was isolated in 35% yield following the general conditions B (the recovery of starting material is 43%).  $^1\text{H}$  NMR (500 MHz,  $\text{CDCl}_3$ )  $\delta$  8.08 (d,  $J = 7.5$  Hz, 1.48H), 8.04 (d,  $J = 7.5$  Hz, 0.50H), 7.61 (t,  $J = 7.4$  Hz, 1H), 7.48 (dd,  $J = 13.9, 7.2$  Hz, 4H), 7.43 – 7.35 (m, 3H), 5.29 (d,  $J = 4.9$  Hz, 0.27H), 5.16 (d,  $J = 8.5$  Hz, 0.77H), 4.85 – 4.75 (m, 1.59H), 4.68 – 4.55 (m, 1.36H), 4.39 (d,  $J = 26.3$  Hz, 0.33H).<sup>17</sup>

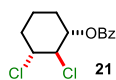

Compound **21** was isolated in 52% yield following the general conditions B (the recovery of starting material is 37%).  $^1\text{H NMR}$  (500 MHz,  $\text{CDCl}_3$ )  $\delta$  8.07 (d,  $J = 7.5$  Hz, 2H), 7.58 (t,  $J = 7.4$  Hz, 1H), 7.46 (t,  $J = 7.7$  Hz, 2H), 5.15 – 5.07 (m, 1H), 4.08 – 3.94 (m, 2H), 2.43 – 2.34 (m, 1H), 2.31 – 2.19 (m, 1H), 1.97 – 1.86 (m, 1H), 1.86 – 1.73 (m, 1H), 1.60 – 1.47 (m, 2H).  $^{13}\text{C NMR}$  (126 MHz,  $\text{CDCl}_3$ )  $\delta$  165.65, 133.38, 129.93, 128.57, 75.53, 66.65, 62.07, 35.77, 30.67, 21.28. **HRMS** Calcd for  $\text{C}_{13}\text{H}_{14}\text{Cl}_2\text{NaO}_2$  [ $\text{M}+\text{Na}^+$ ]: 295.0263; Found: 295.0256.

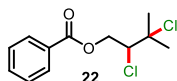

Compound **22** was isolated in 46% yield following the general conditions B (the recovery of starting material is 30%).  $^1\text{H NMR}$  (500 MHz,  $\text{CDCl}_3$ )  $\delta$  8.08 (d,  $J = 7.1$  Hz, 2H), 7.59 (t,  $J = 7.4$  Hz, 1H), 7.46 (t,  $J = 7.8$  Hz, 2H), 5.00 (dd,  $J = 11.9, 3.1$  Hz, 1H), 4.57 (dd,  $J = 11.9, 8.4$  Hz, 1H), 4.35 (dd,  $J = 8.4, 3.1$  Hz, 1H), 1.81 (s, 3H), 1.73 (s, 3H).<sup>17</sup>

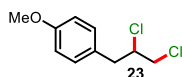

Compound **23** was isolated in 57% yield following the general conditions A.  $^1\text{H NMR}$  (500 MHz,  $\text{CDCl}_3$ )  $\delta$  7.19 (d,  $J = 8.6$  Hz, 2H), 6.87 (d,  $J = 8.6$  Hz, 2H), 4.25 - 4.19 (m, 1H), 3.80 (s, 3H), 3.71 (dd,  $J = 11.4, 4.8$  Hz, 1H), 3.64 (dd,  $J = 11.4, 6.9$  Hz, 1H), 3.23 (dd,  $J = 14.4, 5.8$  Hz, 1H), 3.02 (dd,  $J = 14.4, 7.1$  Hz, 1H).<sup>18</sup>

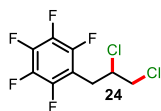

Compound **24** was isolated in 36% yield following the general conditions A.  $^1\text{H NMR}$  (500 MHz,  $\text{CDCl}_3$ )  $\delta$  4.30 – 4.23 (m, 1H), 3.86 (dd,  $J = 11.5, 4.7$  Hz, 1H), 3.73 (dd,  $J = 11.5, 7.7$  Hz, 1H), 3.43 (d,  $J = 14.4$  Hz, 1H), 3.13 (dd,  $J = 14.4, 9.8$  Hz, 1H).<sup>16</sup>

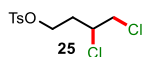

Compound **25** was isolated in 76% yield following the general conditions A. **<sup>1</sup>H NMR** (500 MHz, CDCl<sub>3</sub>) δ 7.80 (d, *J* = 8.3 Hz, 2H), 7.36 (d, *J* = 8.1 Hz, 2H), 4.27 – 4.19 (m, 2H), 4.18 – 4.12 (m, 1H), 3.75 (dd, *J* = 11.6, 4.8 Hz, 1H), 3.64 (dd, *J* = 11.6, 7.1 Hz, 1H), 2.45 (s, 3H), 2.44 – 2.36 (m, 1H), 1.98 – 1.90 (m, 1H). **<sup>13</sup>C NMR** (126 MHz, CDCl<sub>3</sub>) δ 145.23, 132.70, 130.09, 128.05, 66.65, 56.58, 48.15, 34.68, 21.78. **HRMS** Calcd for C<sub>11</sub>H<sub>14</sub>Cl<sub>2</sub>NaO<sub>3</sub>S [M+Na<sup>+</sup>]: 318.9933; Found: 318.9927.

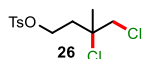

Compound **26** was isolated in 55% yield following the general conditions A (the recovery of starting material is 28%). **<sup>1</sup>H NMR** (500 MHz, CDCl<sub>3</sub>) δ 7.80 (d, *J* = 8.5 Hz, 2H), 7.36 (d, *J* = 7.8 Hz, 2H), 4.26 (t, *J* = 6.6 Hz, 2H), 3.71 – 3.59 (m, 2H), 2.45 (s, 3H), 2.34 – 2.15 (m, 2H), 1.62 (s, 3H). **<sup>13</sup>C NMR** (126 MHz, CDCl<sub>3</sub>) δ 145.18, 132.93, 130.08, 128.05, 68.77, 66.61, 52.94, 39.29, 28.39, 21.78. **HRMS** Calcd for C<sub>12</sub>H<sub>16</sub>Cl<sub>2</sub>NaO<sub>3</sub>S [M+Na<sup>+</sup>]: 333.0089; Found: 333.0092.

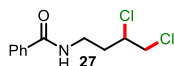

Compound **27** was isolated in 60% yield following the general conditions A. **<sup>1</sup>H NMR** (500 MHz, CDCl<sub>3</sub>) δ 7.77 (d, *J* = 7.2 Hz, 2H), 7.51 (t, *J* = 7.4 Hz, 1H), 7.44 (t, *J* = 7.5 Hz, 2H), 6.44 (br, 1H), 4.19 – 4.12 (m, 1H), 3.83 (dd, *J* = 11.5, 5.1 Hz, 1H), 3.76 – 3.68 (m, 2H), 3.66 – 3.58 (m, 1H), 2.50 – 2.41 (m, 1H), 2.02 – 1.93 (m, 1H). **<sup>13</sup>C NMR** (126 MHz, CDCl<sub>3</sub>) δ 167.88, 134.35, 131.80, 128.79, 127.00, 59.07, 48.37, 37.39, 35.03. **HRMS** Calcd for C<sub>11</sub>H<sub>13</sub>Cl<sub>2</sub>NNaO [M+Na<sup>+</sup>]: 268.0266; Found: 268.0268.

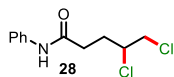

Compound **28** was isolated in 58% yield following the general conditions A. **<sup>1</sup>H NMR** (500 MHz, CDCl<sub>3</sub>) δ 7.50 (d, *J* = 7.9 Hz, 2H), 7.33 (t, *J* = 7.9 Hz, 2H), 7.23 (br, 1H), 7.12 (t, *J* = 7.4 Hz, 1H), 4.25 – 4.17 (m, 1H), 3.81 (dd, *J* = 11.5, 5.1 Hz, 1H), 3.71 (dd, *J* = 11.5, 7.0 Hz, 1H), 2.68 – 2.50 (m, 3H), 2.08 – 1.99 (m, 1H). **<sup>13</sup>C NMR** (126 MHz, CDCl<sub>3</sub>) δ 169.72, 137.73, 129.20, 124.64, 119.99, 60.59, 48.44, 33.74, 30.87. **HRMS** Calcd for C<sub>11</sub>H<sub>13</sub>Cl<sub>2</sub>NNaO [M+Na<sup>+</sup>]: 268.0266; Found: 268.0267.

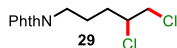

Compound **29** was isolated in 75% yield following the general conditions A. **<sup>1</sup>H NMR** (500 MHz, CDCl<sub>3</sub>) δ 7.86 – 7.82 (m, 2H), 7.74 – 7.69 (m, 2H), 4.12 – 4.06 (m, 1H), 3.77 – 3.70 (m, 3H), 3.65 – 3.60 (m, 1H), 2.09 – 1.95 (m, 2H), 1.88 – 1.73 (m, 2H).<sup>19</sup>

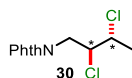

Compound **30** was isolated in 44% yield following the general conditions A (the recovery of starting material is 49%). **<sup>1</sup>H NMR** (500 MHz, CDCl<sub>3</sub>) δ 7.91 – 7.86 (m, 2H), 7.78 – 7.73 (m, 2H), 4.50 – 4.45 (m, 1H), 4.22 – 4.07 (m, 3H), 1.72 (d, *J* = 6.6 Hz, 3H). **<sup>13</sup>C NMR** (126 MHz, CDCl<sub>3</sub>) δ 171.30, 168.02, 134.43, 131.90, 123.74, 62.94, 60.54, 58.07, 41.97. **HRMS** Calcd for C<sub>12</sub>H<sub>11</sub>Cl<sub>2</sub>NNaO<sub>2</sub> [M+Na<sup>+</sup>]: 294.0059; Found: 294.0060.

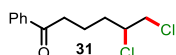

Compound **31** was isolated in 57% yield following the general conditions A (the recovery of starting material is 30%). **<sup>1</sup>H NMR** (500 MHz, CDCl<sub>3</sub>) δ 7.96 (d, *J* = 6.9 Hz, 2H), 7.57 (t, *J* = 7.2 Hz, 1H), 7.47 (t, *J* = 7.8 Hz, 2H), 4.13 – 4.06 (m, 1H), 3.79 (dd, *J* = 11.4, 5.1 Hz, 1H), 3.68 (dd, *J* = 11.4, 7.4 Hz, 1H), 3.11 – 2.98 (m, 2H), 2.16 – 2.08 (m, 1H), 2.08 – 1.99 (m, 1H), 1.95 – 1.86 (m, 1H), 1.86 – 1.77 (m, 1H). **<sup>13</sup>C NMR** (126 MHz, CDCl<sub>3</sub>) δ 199.50, 136.99, 133.27, 128.79, 128.15, 60.99, 48.26, 37.77, 34.70, 20.67. **HRMS** Calcd for C<sub>12</sub>H<sub>14</sub> <sup>37</sup>Cl<sup>35</sup>ClNaO [M+Na<sup>+</sup>]: 269.0284; Found: 269.0274.

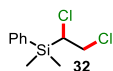

Compound **32** was isolated in 67% yield following the general conditions B. **<sup>1</sup>H NMR** (500 MHz, CDCl<sub>3</sub>) δ 7.55 (d, *J* = 7.0 Hz, 2H), 7.46 – 7.38 (m, 3H), 3.86 (d, *J* = 11.5 Hz, 1H), 3.70 – 3.60 (m, 2H), 0.50 (s, 6H). **<sup>13</sup>C NMR** (126 MHz, CDCl<sub>3</sub>) δ 134.35, 134.16, 130.29, 128.32, 51.22, 48.65, -4.13, -5.30. **HRMS** Calcd for C<sub>10</sub>H<sub>14</sub>Cl<sub>2</sub>KSi [M+K<sup>+</sup>]: 270.9873; Found: 270.9872.

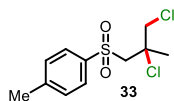

Compound **33** was isolated in 35% yield following the general conditions B (the recovery of starting material is 40%). **<sup>1</sup>H NMR** (500 MHz, CDCl<sub>3</sub>) δ 7.82 (d, *J* = 7.8 Hz, 2H), 7.37 (d, *J* = 8.0 Hz, 2H), 4.11 – 4.00 (m, 2H), 3.81 (d, *J* = 14.5 Hz, 1H), 3.60 (d, *J* = 14.6 Hz, 1H), 2.45 (s, 3H), 1.93 (s, 3H). **<sup>13</sup>C NMR** (126 MHz, CDCl<sub>3</sub>) δ 145.41, 137.66, 130.18, 128.08, 66.43, 63.59, 52.86, 28.59, 21.81. **HRMS** Calcd for C<sub>11</sub>H<sub>14</sub>Cl<sub>2</sub>NaO<sub>2</sub>S [M+Na<sup>+</sup>]: 302.9984; Found: 302.9982.

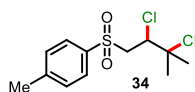

Compound **34** was isolated in 33% yield following the general conditions B (the recovery of starting material is 43%). **<sup>1</sup>H NMR** (500 MHz, CDCl<sub>3</sub>) δ 7.82 (d, *J* = 7.9 Hz, 2H), 7.37 (d, *J* = 8.0 Hz, 2H), 4.35 (d, *J* = 9.5 Hz, 1H), 3.99 (d, *J* = 15.1 Hz, 1H), 3.52 (dd, *J* = 15.1, 9.6 Hz, 1H), 2.45 (s, 3H), 1.70 (s, 3H), 1.55 (s, 3H). **<sup>13</sup>C NMR** (126 MHz, CDCl<sub>3</sub>) δ 145.35, 136.39, 130.09, 128.55, 70.44, 61.81, 60.87, 31.16, 26.88, 21.84. **HRMS** Calcd for C<sub>12</sub>H<sub>16</sub>Cl<sub>2</sub>NaO<sub>2</sub>S [M+Na<sup>+</sup>]: 317.0140; Found: 317.0147.

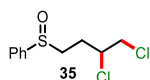

Compound **35** was isolated in 60% yield following the general conditions A. **<sup>1</sup>H NMR** (500 MHz, CDCl<sub>3</sub>) δ 7.37 (d, *J* = 7.8 Hz, 2H), 7.30 (t, *J* = 7.7 Hz, 2H), 7.21 (t, *J* = 7.3 Hz, 1H), 4.30 – 4.23 (m, 1H), 3.78 (dd, *J* = 11.4, 4.9 Hz, 1H), 3.65 (dd, *J* = 11.4, 7.5 Hz, 1H), 3.23 – 3.16 (m, 1H), 3.05 – 2.99 (m, 1H), 2.32 – 2.24 (m, 1H), 2.07 – 1.99 (m, 1H). **<sup>13</sup>C NMR** (126 MHz, CDCl<sub>3</sub>) δ 135.42, 129.98, 129.21, 126.65, 59.47, 48.11, 34.72, 30.51. **HRMS** Calcd for C<sub>10</sub>H<sub>13</sub>Cl<sub>2</sub>OS [M+H<sup>+</sup>]: 251.0059; Found: 251.0059.

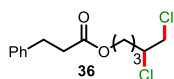

Compound **36** was isolated in 77% yield following the general conditions A. **<sup>1</sup>H NMR** (500 MHz, CDCl<sub>3</sub>) δ 7.29 (t, *J* = 7.5 Hz, 2H), 7.20 (d, *J* = 7.7 Hz, 3H), 4.16 – 4.07 (m, 2H), 4.05 – 3.99 (m, 1H), 3.75 (dd, *J* = 11.3, 5.0 Hz, 1H), 3.62 (dd, *J* = 11.3, 7.7 Hz, 1H), 2.96 (t, *J* = 7.7 Hz, 2H), 2.65 (t, *J* = 7.7 Hz, 2H), 2.06 – 1.98 (m, 1H), 1.93 – 1.83 (m, 1H), 1.78 – 1.66 (m, 2H). **<sup>13</sup>C NMR** (126 MHz, CDCl<sub>3</sub>) δ 172.98, 140.54, 128.64,

128.41, 126.43, 63.64, 60.59, 48.12, 35.95, 31.75, 31.09, 25.32. **HRMS** Calcd for  $C_{14}H_{18}Cl_2NaO_2$  [ $M+Na^+$ ]: 311.0576; Found: 311.0575.

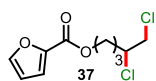

Compound **37** was isolated in 65% yield following the general conditions A.  **$^1H$  NMR** (500 MHz,  $CDCl_3$ )  $\delta$  7.58 (d,  $J = 0.9$  Hz, 1H), 7.18 (d,  $J = 3.5$  Hz, 1H), 6.51 (dd,  $J = 3.5, 1.7$  Hz, 1H), 4.39 – 4.32 (m, 2H), 4.13 – 4.07 (m, 1H), 3.79 (dd,  $J = 11.4, 5.0$  Hz, 1H), 3.66 (dd,  $J = 11.4, 7.7$  Hz, 1H), 2.21 – 2.14 (m, 1H), 2.09 – 2.02 (m, 1H), 1.94 – 1.79 (m, 2H).  **$^{13}C$  NMR** (126 MHz,  $CDCl_3$ )  $\delta$  158.76, 146.53, 144.67, 118.16, 111.99, 64.10, 60.53, 48.11, 31.78, 25.42. **HRMS** Calcd for  $C_{10}H_{12}Cl_2NaO_3$  [ $M+Na^+$ ]: 273.0056; Found: 273.0057.

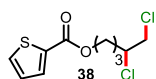

Compound **38** was isolated in 67% yield following the general conditions A.  **$^1H$  NMR** (500 MHz,  $CDCl_3$ )  $\delta$  7.81 (d,  $J = 3.6$  Hz, 1H), 7.56 (d,  $J = 4.9$  Hz, 1H), 7.11 (t, 1H), 4.39 – 4.32 (m, 2H), 4.14 – 4.09 (m, 1H), 3.80 (dd,  $J = 11.3, 5.0$  Hz, 1H), 3.66 (dd, 1H), 2.23 – 2.15 (m, 1H), 2.09 – 2.02 (m, 1H), 1.95 – 1.81 (m, 2H).  **$^{13}C$  NMR** (126 MHz,  $CDCl_3$ )  $\delta$  162.29, 133.79, 133.63, 132.60, 127.93, 64.31, 60.55, 48.11, 31.85, 25.42. **HRMS** Calcd for  $C_{10}H_{12}Cl_2NaO_2S$  [ $M+Na^+$ ]: 288.9827; Found: 288.9829.

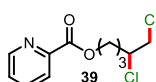

Compound **39** was isolated in 66% yield following the general conditions A.  **$^1H$  NMR** (500 MHz,  $CDCl_3$ )  $\delta$  8.77 (d,  $J = 4.6$  Hz, 1H), 8.13 (d,  $J = 7.8$  Hz, 1H), 7.85 (t,  $J = 7.7$  Hz, 1H), 7.49 (dd,  $J = 6.8, 4.8$  Hz, 1H), 4.52 – 4.43 (m, 2H), 4.16 – 4.09 (m, 1H), 3.79 (dd,  $J = 11.4, 5.0$  Hz, 1H), 3.67 (dd,  $J = 11.4, 7.6$  Hz, 1H), 2.25 – 2.08 (m, 2H), 2.03 – 1.93 (m, 1H), 1.91 – 1.82 (m, 1H).  **$^{13}C$  NMR** (126 MHz,  $CDCl_3$ )  $\delta$  165.29, 150.09, 148.12, 137.19, 127.11, 125.31, 65.12, 60.59, 48.16, 31.81, 25.47. **HRMS** Calcd for  $C_{11}H_{13}Cl_2NNaO_2$  [ $M+Na^+$ ]: 284.0216; Found: 284.0213.

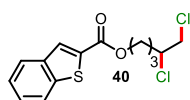



Compound **40** was isolated in 76% yield following the general conditions A. **<sup>1</sup>H NMR** (500 MHz, CDCl<sub>3</sub>) δ 8.59 (d, *J* = 8.2 Hz, 1H), 8.39 (s, 1H), 7.88 (d, *J* = 8.1 Hz, 1H), 7.49 (t, *J* = 7.5 Hz, 1H), 7.42 (t, *J* = 7.5 Hz, 1H), 4.48 - 4.38 (m, 2H), 4.18 - 4.10 (m, 1H), 3.82 (dd, *J* = 11.3, 4.9 Hz, 1H), 3.68 (dd, *J* = 11.3, 7.9 Hz, 1H), 2.29 - 2.20 (m, 1H), 2.16 - 2.06 (m, 1H), 2.02 - 1.86 (m, 2H). **<sup>13</sup>C NMR** (126 MHz, CDCl<sub>3</sub>) δ 162.81, 140.18, 136.85, 136.79, 127.18, 125.60, 125.20, 124.82, 122.67, 63.85, 60.53, 48.05, 31.93, 25.45. **HRMS** Calcd for C<sub>14</sub>H<sub>14</sub>Cl<sub>2</sub>NaO<sub>2</sub>S [M+Na<sup>+</sup>]: 338.9984; Found: 338.9983.

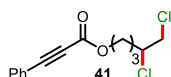

Compound **41** was isolated in 70% yield following the general conditions A. **<sup>1</sup>H NMR** (500 MHz, CDCl<sub>3</sub>) δ 7.60 (d, *J* = 7.6 Hz, 2H), 7.46 (t, *J* = 7.4 Hz, 1H), 7.38 (t, *J* = 7.6 Hz, 2H), 4.33 - 4.25 (m, 2H), 4.12 - 4.06 (m, 1H), 3.80 (dd, *J* = 11.3, 5.0 Hz, 1H), 3.67 (dd, *J* = 11.3, 7.7 Hz, 1H), 2.21 - 2.14 (m, 1H), 2.08 - 2.00 (m, 1H), 1.91 - 1.79 (m, 2H). **<sup>13</sup>C NMR** (126 MHz, CDCl<sub>3</sub>) δ 154.16, 133.16, 130.86, 128.73, 119.67, 86.76, 80.60, 65.25, 60.55, 48.13, 31.77, 25.30. **HRMS** Calcd for C<sub>14</sub>H<sub>14</sub>Cl<sub>2</sub>NaO<sub>2</sub> [M+Na<sup>+</sup>]: 307.0263; Found: 307.0263.

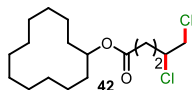

Compound **42** was isolated in 71% yield following the general conditions B. **<sup>1</sup>H NMR** (500 MHz, CDCl<sub>3</sub>) δ 5.09 - 4.99 (m, 1H), 4.18 - 4.10 (m, 1H), 3.78 (dd, *J* = 11.4, 5.0 Hz, 1H), 3.65 (dd, *J* = 11.4, 7.5 Hz, 1H), 2.60 - 2.45 (m, 2H), 2.41 - 2.34 (m, 1H), 2.00 - 1.91 (m, 1H), 1.75 - 1.66 (m, 2H), 1.53 - 1.46 (m, 2H), 1.42 - 1.29 (m, 18H). **<sup>13</sup>C NMR** (126 MHz, CDCl<sub>3</sub>) δ 172.26, 72.81, 60.22, 48.21, 31.05, 30.56, 29.23, 24.19, 23.96, 23.50, 23.33, 21.06. **HRMS** Calcd for C<sub>17</sub>H<sub>30</sub>Cl<sub>2</sub>NaO<sub>2</sub> [M+Na<sup>+</sup>]: 359.1515; Found: 359.1515.

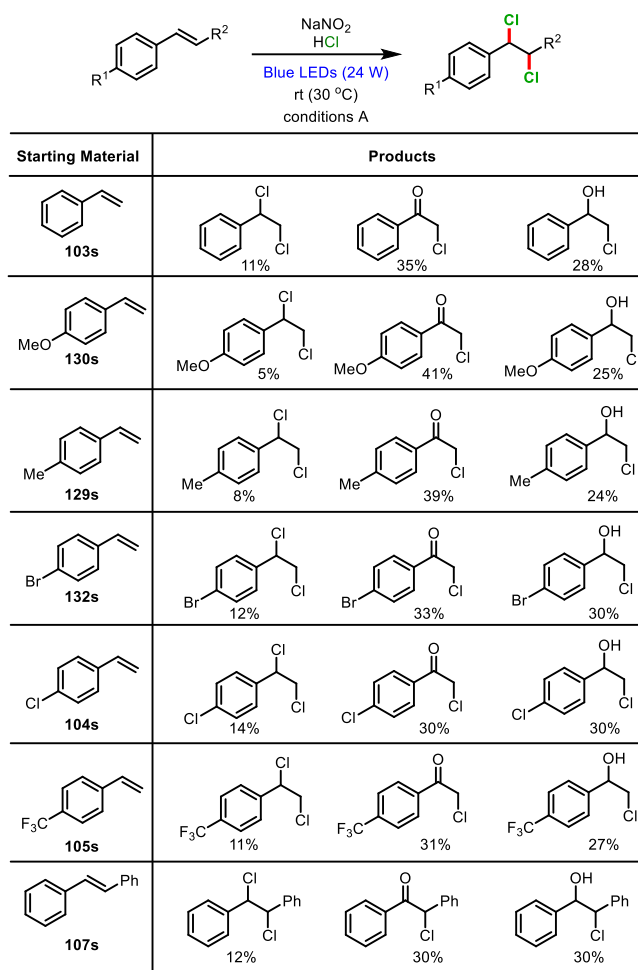

Scheme S19. Visible-light-induced vicinal dichlorination of active alkenes

## 5.2 Visible-light-induced vicinal dichlorination of alkynes

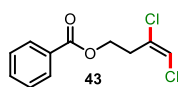

Compound **43** was isolated in 40% yield following the general conditions A (the recovery of starting material is 42%). <sup>1</sup>H NMR (500 MHz, CDCl<sub>3</sub>) δ 8.05 (d, *J* = 7.1 Hz, 2H), 7.56 (t, *J* = 7.4 Hz, 1H), 7.44 (t, *J* = 7.8 Hz, 2H), 6.31 (s, 1H), 4.54 (t, *J* = 6.2 Hz, 2H), 3.01 (t, *J* = 6.2 Hz, 2H). <sup>13</sup>C NMR (126 MHz, CDCl<sub>3</sub>) δ 166.51, 133.20, 132.25, 130.05, 129.82, 128.51, 116.53, 61.08, 33.22. HRMS Calcd for C<sub>11</sub>H<sub>11</sub>Cl<sub>2</sub>O<sub>2</sub> [M+H<sup>+</sup>]: 245.0131; Found: 245.0131.

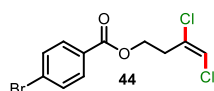

Compound **44** was isolated in 46% yield following the general conditions A (the recovery of starting material is 37%). **<sup>1</sup>H NMR** (500 MHz, CDCl<sub>3</sub>) δ 7.90 (d, *J* = 8.5 Hz, 2H), 7.58 (d, *J* = 8.5 Hz, 2H), 6.30 (s, 1H), 4.53 (t, *J* = 6.2 Hz, 2H), 3.00 (t, *J* = 6.2 Hz, 2H). **<sup>13</sup>C NMR** (126 MHz, CDCl<sub>3</sub>) δ 165.77, 132.14, 131.90, 131.34, 128.94, 128.38, 116.61, 61.31, 33.20. **HRMS** Calcd for C<sub>11</sub>H<sub>9</sub>BrCl<sub>2</sub>NaO<sub>2</sub> [M+Na<sup>+</sup>]: 344.9055; Found: 344.9049.

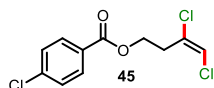

Compound **45** was isolated in 43% yield following the general conditions A (the recovery of starting material is 42%). **<sup>1</sup>H NMR** (500 MHz, CDCl<sub>3</sub>) δ 7.97 (d, *J* = 8.6 Hz, 2H), 7.41 (d, *J* = 8.6 Hz, 2H), 6.31 (s, 1H), 4.53 (t, *J* = 6.2 Hz, 2H), 3.00 (t, *J* = 6.2 Hz, 2H). **<sup>13</sup>C NMR** (126 MHz, CDCl<sub>3</sub>) δ 165.64, 139.70, 132.15, 131.21, 128.90, 128.49, 116.60, 61.29, 33.20. **HRMS** Calcd for C<sub>11</sub>H<sub>9</sub>Cl<sub>3</sub>NaO<sub>2</sub> [M+Na<sup>+</sup>]: 300.9560; Found: 300.9553.

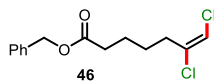

Compound **46** was isolated in 48% yield following the general conditions B (the recovery of starting material is 34%). **<sup>1</sup>H NMR** (500 MHz, CDCl<sub>3</sub>) δ 7.39 – 7.30 (m, 5H), 6.15 (s, 1H), 5.12 (s, 2H), 2.53 (t, *J* = 7.1 Hz, 2H), 2.40 (t, *J* = 7.3 Hz, 2H), 1.74 – 1.66 (m, 2H), 1.65 – 1.60 (m, 2H). **<sup>13</sup>C NMR** (126 MHz, CDCl<sub>3</sub>) δ 173.28, 136.13, 135.93, 128.70, 128.35, 128.33, 114.21, 66.35, 34.06, 32.90, 25.91, 23.89. **HRMS** Calcd for C<sub>14</sub>H<sub>16</sub>Cl<sub>2</sub>NaO<sub>2</sub> [M+Na<sup>+</sup>]: 309.0420; Found: 309.0418.

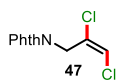

Compound **47** was isolated in 41% yield following the general conditions B (the recovery of starting material is 34%). **<sup>1</sup>H NMR** (500 MHz, CDCl<sub>3</sub>) δ 7.90 – 7.86 (m, 2H), 7.77 – 7.72 (m, 2H), 6.38 (s, 1H), 4.71 (s, 2H). **<sup>13</sup>C NMR** (126 MHz, CDCl<sub>3</sub>) δ 167.46, 134.39, 131.94, 129.72, 123.73, 117.74, 38.41. **HRMS** Calcd for C<sub>11</sub>H<sub>7</sub>Cl<sub>2</sub>NNaO<sub>2</sub> [M+Na<sup>+</sup>]: 277.9746; Found: 277.9739.

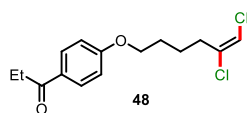

Compound **48** was isolated in 41% yield following the general conditions B (the recovery of starting material is 42%).  $^1\text{H NMR}$  (500 MHz,  $\text{CDCl}_3$ )  $\delta$  7.94 (d,  $J = 8.8$  Hz, 2H), 6.92 (d,  $J = 8.8$  Hz, 2H), 6.18 (s, 1H), 4.04 (t,  $J = 6.0$  Hz, 2H), 2.95 (q,  $J = 7.3$  Hz, 2H), 2.61 (t,  $J = 7.0$  Hz, 2H), 1.88 – 1.75 (m, 4H), 1.21 (t,  $J = 7.3$  Hz, 3H).  $^{13}\text{C NMR}$  (126 MHz,  $\text{CDCl}_3$ )  $\delta$  199.64, 162.87, 135.97, 130.36, 130.10, 114.35, 114.26, 67.74, 32.84, 31.55, 28.02, 23.03, 8.61. **HRMS** Calcd for  $\text{C}_{15}\text{H}_{18}\text{Cl}_2\text{NaO}_2$  [ $\text{M}+\text{Na}^+$ ]: 323.0576; Found: 323.0583.

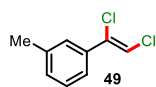

Compound **49** was isolated in 14% yield following the general conditions A.  $^1\text{H NMR}$  (500 MHz,  $\text{CDCl}_3$ )  $\delta$  7.33 (d,  $J = 11.7$  Hz, 2H), 7.28 (s, 1H), 7.18 (d,  $J = 7.5$  Hz, 1H), 6.67 (s, 1H), 2.37 (s, 3H).<sup>20</sup>

### 5.3 Visible-light-induced vicinal dichlorination of natural products and drug derivatives

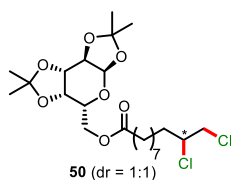

Alkene (**50s**) (0.2 mmol, 1.0 equiv),  $\text{NaNO}_2$  (0.2 mmol, 1.0 equiv) and  $\text{HCl}$  (100  $\mu\text{L}$ , aq. 37% in water) were dispersed in  $\text{PhCl}$  (2.0 mL) in a 4 mL glass vial at room temperature. The reaction vial was sealed with a PTEF cap and the reaction mixture vigorously stirred at 30 °C under the 24 W blue LEDs irradiation for 0.5 h (It is worth noting that 24 W blue LEDs was positioned 5 cm aside from the reaction vials.). Then, the reaction mixture was extracted with  $\text{CH}_2\text{Cl}_2$  ( $3 \times 2$  mL). The combined organic layer was dried over anhydrous  $\text{Na}_2\text{SO}_4$ , filtered and concentrated. The residue was purified by chromatography on silica gel to afford the desired dichlorination products. Compound **50** was isolated in 55% yield.  $^1\text{H NMR}$  (500 MHz,  $\text{CDCl}_3$ )  $\delta$  5.54 (d,  $J =$

5.0 Hz, 1H), 4.61 (dd,  $J = 7.9, 2.3$  Hz, 1H), 4.31 (dd,  $J = 11.7, 4.6$  Hz, 2H), 4.23 (dd,  $J = 7.9, 1.2$  Hz, 1H), 4.16 (dd,  $J = 11.5, 7.8$  Hz, 1H), 4.06 – 3.99 (m, 2H), 3.76 (dd,  $J = 11.3, 5.2$  Hz, 1H), 3.65 (dd,  $J = 11.3, 7.4$  Hz, 1H), 2.33 (t,  $J = 7.5$  Hz, 2H), 2.02 – 1.93 (m, 1H), 1.75 – 1.65 (m, 1H), 1.65 – 1.52 (m, 5H), 1.50 (s, 3H), 1.45 (s, 3H), 1.43 – 1.37 (m, 1H), 1.33 (d,  $J = 3.8$  Hz, 6H), 1.31 – 1.26 (m, 6H).  $^{13}\text{C}$  NMR (126 MHz,  $\text{CDCl}_3$ )  $\delta$  173.88, 109.78, 108.89, 96.46, 71.24, 70.85, 70.61, 66.19, 63.39, 61.36, 48.40, 35.17, 34.33, 29.32, 29.28, 29.16, 29.05, 26.17, 26.10, 25.92, 25.12, 25.07, 24.64. **HRMS** Calcd for  $\text{C}_{23}\text{H}_{38}\text{Cl}_2\text{NaO}_7$  [ $\text{M}+\text{Na}^+$ ]: 519.1887; Found: 519.1888.

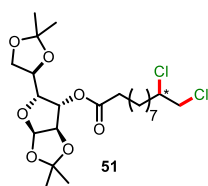

Alkene (**51s**) (0.2 mmol, 1.0 equiv),  $\text{NaNO}_2$  (0.2 mmol, 1.0 equiv) and  $\text{HCl}$  (100  $\mu\text{L}$ , aq. 37% in water) were dispersed in  $\text{PhCl}$  (2.0 mL) in a 4 mL glass vial at room temperature. The reaction vial was sealed with a PTEF cap and the reaction mixture vigorously stirred at 30 °C under the 24 W blue LEDs irradiation for 0.5 h (It is worth noting that 24 W blue LEDs was positioned 5 cm aside from the reaction vials.). Then, the reaction mixture was extracted with  $\text{CH}_2\text{Cl}_2$  (3  $\times$  2 mL). The combined organic layer was dried over anhydrous  $\text{Na}_2\text{SO}_4$ , filtered and concentrated. The residue was purified by chromatography on silica gel to afford the desired dichlorination products. Compound **51** was isolated in 60% yield.  $^1\text{H}$  NMR (500 MHz,  $\text{CDCl}_3$ )  $\delta$  5.87 (d,  $J = 3.6$  Hz, 1H), 5.27 (s, 1H), 4.47 (d,  $J = 3.6$  Hz, 1H), 4.21 (t,  $J = 3.4$  Hz, 2H), 4.12 – 4.07 (m, 1H), 4.06 – 3.98 (m, 2H), 3.76 (dd,  $J = 11.3, 5.1$  Hz, 1H), 3.65 (dd,  $J = 11.3, 7.5$  Hz, 1H), 2.34 (td,  $J = 7.5, 3.0$  Hz, 2H), 2.02 – 1.94 (m, 1H), 1.75 – 1.68 (m, 1H), 1.67 – 1.60 (m, 2H), 1.52 (s, 3H), 1.41 (m, 4H), 1.38 – 1.26 (m, 15H).  $^{13}\text{C}$  NMR (126 MHz,  $\text{CDCl}_3$ )  $\delta$  172.47, 112.45, 109.47, 105.22, 83.56, 80.04, 76.01, 72.60, 67.45, 61.32, 48.37, 35.15, 34.39, 29.33, 29.25, 29.13, 29.05, 26.98, 26.90, 26.37, 25.90, 25.44, 24.99. **HRMS** Calcd for  $\text{C}_{23}\text{H}_{38}\text{Cl}_2\text{NaO}_7$  [ $\text{M}+\text{Na}^+$ ]: 519.1887; Found: 519.1885.

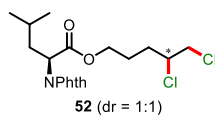

Compound **52** was isolated in 68% yield following the general conditions A. **<sup>1</sup>H NMR** (500 MHz, CDCl<sub>3</sub>) δ 7.89 – 7.84 (m, 2H), 7.77 – 7.72 (m, 2H), 4.94 (dd, *J* = 11.5, 4.3 Hz, 1H), 4.25 – 4.11 (m, 2H), 4.01 – 3.93 (m, 1H), 3.72 – 3.66 (m, 1H), 3.55 (dd, *J* = 11.2, 7.8 Hz, 1H), 2.36 – 2.28 (m, 1H), 2.02 – 1.93 (m, 2H), 1.91 – 1.84 (m, 1H), 1.77 – 1.65 (m, 2H), 1.54 – 1.45 (m, 1H), 0.95 (d, *J* = 6.5 Hz, 3H), 0.92 (d, *J* = 6.7 Hz, 3H). **<sup>13</sup>C NMR** (126 MHz, CDCl<sub>3</sub>) δ 169.87, 167.88, 134.35, 131.92, 123.68, 64.86, 60.36, 50.80, 48.03, 47.99, 37.44, 31.54, 25.21, 25.09, 25.06, 23.29, 21.18. **HRMS** Calcd for C<sub>19</sub>H<sub>23</sub>Cl<sub>2</sub>NNaO<sub>4</sub> [M+Na<sup>+</sup>]: 422.0896; Found: 422.0895.

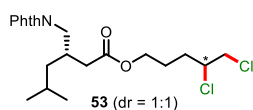

Compound **53** was isolated in 48% yield following the general conditions B. **<sup>1</sup>H NMR** (500 MHz, CDCl<sub>3</sub>) δ 7.86 – 7.81 (m, 2H), 7.74 – 7.68 (m, 2H), 4.12 – 3.89 (m, 3H), 3.77 (dd, *J* = 11.3, 5.0 Hz, 1H), 3.73 – 3.57 (m, 3H), 2.50 – 2.40 (m, 1H), 2.35 – 2.24 (m, 2H), 2.10 – 2.01 (m, 1H), 1.90 – 1.81 (m, 1H), 1.77 – 1.65 (m, 3H), 1.25 – 1.17 (m, 2H), 0.95 (d, *J* = 6.5 Hz, 3H), 0.89 (d, *J* = 6.5 Hz, 3H). **<sup>13</sup>C NMR** (126 MHz, CDCl<sub>3</sub>) δ 172.54, 168.70, 134.09, 132.14, 123.36, 63.57, 63.56, 60.67, 48.20, 42.06, 41.91, 37.73, 32.83, 31.81, 25.43, 25.28, 22.80, 22.71, 18.56. **HRMS** Calcd for C<sub>21</sub>H<sub>27</sub>Cl<sub>2</sub>NNaO<sub>4</sub> [M+Na<sup>+</sup>]: 450.1209; Found: 450.1208.

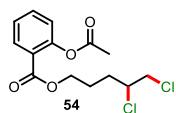

Compound **54** was isolated in 64% yield following the general conditions A. **<sup>1</sup>H NMR** (500 MHz, CDCl<sub>3</sub>) δ 8.00 (d, *J* = 7.8 Hz, 1H), 7.56 (t, *J* = 7.7 Hz, 1H), 7.31 (t, *J* = 7.6 Hz, 1H), 7.10 (d, *J* = 8.1 Hz, 1H), 4.37 – 4.27 (m, 2H), 4.14 – 4.09 (m, 1H), 3.79 (dd, *J* = 11.3, 5.0 Hz, 1H), 3.66 (dd, *J* = 11.3, 7.7 Hz, 1H), 2.35 (s, 3H), 2.19 – 2.12 (m, 1H), 2.05 – 2.03 (m, 1H), 1.93 – 1.80 (m, 2H). **<sup>13</sup>C NMR** (126 MHz, CDCl<sub>3</sub>) δ 169.77, 164.45, 150.84, 134.05, 131.73, 126.15, 123.94, 123.29, 64.26, 60.57, 48.11, 31.77, 25.39, 21.18. **HRMS** Calcd for C<sub>14</sub>H<sub>16</sub>Cl<sub>2</sub>NaO<sub>4</sub> [M+Na<sup>+</sup>]: 341.0318; Found: 341.0318.

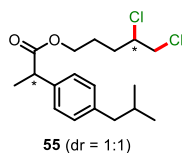

Compound **55** was isolated in 53% yield following the general conditions A. **<sup>1</sup>H NMR** (500 MHz, CDCl<sub>3</sub>) δ 7.20 (d, *J* = 7.8 Hz, 2H), 7.09 (d, *J* = 7.8 Hz, 2H), 4.17 – 4.06 (m, 2H), 3.98 – 3.92 (m, 1H), 3.69 (dd, 2H), 3.54 (dd, *J* = 11.2, 7.6 Hz, 1H), 2.44 (d, *J* = 7.2 Hz, 2H), 1.98 – 1.81 (m, 3H), 1.75 – 1.62 (m, 2H), 1.49 (d, *J* = 7.1 Hz, 3H), 0.90 (d, *J* = 6.6 Hz, 6H). **<sup>13</sup>C NMR** (126 MHz, CDCl<sub>3</sub>) δ 174.81, 140.75, 137.82, 129.49, 127.28, 63.81, 63.71, 60.55, 60.53, 48.12, 45.30, 45.16, 31.72, 31.63, 30.33, 25.24, 25.23, 22.53, 18.45, 18.43. **HRMS** Calcd for C<sub>18</sub>H<sub>26</sub>Cl<sub>2</sub>NaO<sub>2</sub> [M+Na<sup>+</sup>]: 367.1202; Found: 367.1201.

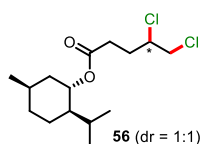

Compound **56** was isolated in 61% yield following the general conditions B. **<sup>1</sup>H NMR** (500 MHz, CDCl<sub>3</sub>) δ 5.09 – 5.02 (m, 1H), 4.20 – 4.09 (m, 1H), 3.79 (dd, *J* = 11.4, 5.0 Hz, 1H), 3.66 (dd, *J* = 11.4, 7.5 Hz, 1H), 2.62 – 2.47 (m, 2H), 2.43 – 2.33 (m, 1H), 2.01 – 1.92 (m, 1H), 1.91 – 1.82 (m, 1H), 1.77 – 1.68 (m, 1H), 1.63 – 1.53 (m, 2H), 1.52 – 1.42 (m, 3H), 1.36 – 1.27 (m, 1H), 1.26 – 1.16 (m, 1H), 0.93 (t, *J* = 6.4 Hz, 6H), 0.84 (d, *J* = 6.7 Hz, 3H). **<sup>13</sup>C NMR** (126 MHz, CDCl<sub>3</sub>) δ 171.96, 72.30, 60.24, 60.22, 48.18, 45.84, 45.79, 35.91, 31.12, 30.56, 30.54, 30.04, 30.03, 27.69, 27.67, 26.44, 26.41, 21.01, 21.00, 20.94, 20.63, 20.60, 19.17, 19.15. **HRMS** Calcd for C<sub>15</sub>H<sub>26</sub>Cl<sub>2</sub>NaO<sub>2</sub> [M+Na<sup>+</sup>]: 331.1202; Found: 331.1203.

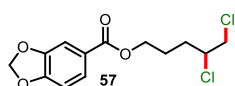

Compound **57** was isolated in 53% yield following the general conditions B. **<sup>1</sup>H NMR** (500 MHz, CDCl<sub>3</sub>) δ 7.65 (d, *J* = 8.1 Hz, 1H), 7.46 (s, 1H), 6.84 (d, *J* = 8.2 Hz, 1H), 6.04 (s, 2H), 4.38 – 4.30 (m, 2H), 4.16 – 4.07 (m, 1H), 3.80 (dd, *J* = 11.3, 4.9 Hz, 1H), 3.67 (dd, *J* = 11.3, 7.8 Hz, 1H), 2.24 – 2.15 (m, 1H), 2.10 – 2.02 (m, 1H), 1.95 – 1.82 (m, 2H). **<sup>13</sup>C NMR** (126 MHz, CDCl<sub>3</sub>) δ 166.00, 151.81, 147.89, 125.49, 124.29, 109.62, 108.15, 101.95, 64.10, 60.58, 48.10, 31.91, 25.46. **HRMS** Calcd for C<sub>13</sub>H<sub>14</sub>Cl<sub>2</sub>NaO<sub>4</sub> [M+Na<sup>+</sup>]: 327.0161; Found: 327.0162.

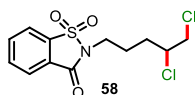

Compound **58** was isolated in 65% yield following the general conditions A. **<sup>1</sup>H NMR** (500 MHz, CDCl<sub>3</sub>) δ 8.06 (d, *J* = 7.3 Hz, 1H), 7.93 (d, *J* = 7.5 Hz, 1H), 7.91 – 7.82 (m, 2H), 4.14 – 4.08 (m, 1H), 3.84 (t, *J* = 6.6 Hz, 2H), 3.77 (dd, *J* = 11.4, 5.1 Hz, 1H), 3.66 (dd, *J* = 11.3, 7.5 Hz, 1H), 2.20 – 2.11 (m, 2H), 2.04 – 1.95 (m, 1H), 1.90 – 1.81 (m, 1H). **<sup>13</sup>C NMR** (126 MHz, CDCl<sub>3</sub>) δ 159.18, 137.78, 134.98, 134.54, 127.41, 125.38, 121.12, 60.28, 48.17, 38.66, 32.31, 25.14. **HRMS** Calcd for C<sub>12</sub>H<sub>13</sub>Cl<sub>2</sub>NNaO<sub>3</sub>S [M+Na<sup>+</sup>]: 343.9885; Found: 343.9885.

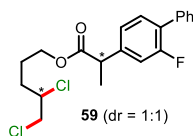

Compound **59** was isolated in 60% yield following the general conditions B. **<sup>1</sup>H NMR** (500 MHz, CDCl<sub>3</sub>) δ 7.55 (d, *J* = 6.8 Hz, 2H), 7.45 (t, *J* = 7.6 Hz, 2H), 7.43 – 7.35 (m, 2H), 7.15 (dd, *J* = 14.3, 9.8 Hz, 2H), 4.24 – 4.09 (m, 2H), 4.04 – 3.95 (m, 1H), 3.82 – 3.69 (m, 2H), 3.57 (dd, *J* = 11.4, 7.8 Hz, 1H), 2.07 – 1.97 (m, 1H), 1.96 – 1.87 (m, 1H), 1.82 – 1.73 (m, 1H), 1.73 – 1.64 (m, 1H), 1.55 (d, *J* = 7.1 Hz, 3H). **<sup>13</sup>C NMR** (126 MHz, CDCl<sub>3</sub>) δ 173.99, 160.79, 158.81, 141.88, 141.82, 135.55, 130.98, 130.95, 129.07, 129.04, 128.58, 127.81, 123.68, 123.65, 115.45, 115.26, 64.14, 64.07, 60.40, 60.38, 47.99, 45.15, 31.68, 31.60, 25.18, 18.31. **HRMS** Calcd for C<sub>20</sub>H<sub>21</sub>Cl<sub>2</sub>FNaO<sub>2</sub> [M+Na<sup>+</sup>]: 405.0795; Found: 405.0796.

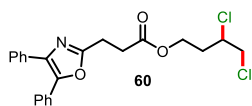

Compound **60** was isolated in 60% yield following the general conditions B. **<sup>1</sup>H NMR** (500 MHz, CDCl<sub>3</sub>) δ 7.63 (d, *J* = 7.3 Hz, 2H), 7.57 (d, *J* = 7.3 Hz, 2H), 7.40 – 7.30 (m, 6H), 4.42 – 4.36 (m, 1H), 4.34 – 4.26 (m, 1H), 4.19 – 4.12 (m, 1H), 3.71 (dd, *J* = 11.4, 4.8 Hz, 1H), 3.59 (dd, *J* = 11.4, 7.3 Hz, 1H), 3.19 (t, *J* = 7.3 Hz, 2H), 2.94 (t, *J* = 7.3 Hz, 2H), 2.41 – 2.31 (m, 1H), 2.07 – 1.96 (m, 1H). **<sup>13</sup>C NMR** (126 MHz, CDCl<sub>3</sub>) δ 171.90, 161.73, 145.63, 135.28, 132.55, 129.08, 128.80, 128.70, 128.64, 128.23, 128.03, 126.63, 61.29, 57.44, 48.28, 34.31, 31.17, 23.63. **HRMS** Calcd for C<sub>22</sub>H<sub>21</sub>Cl<sub>2</sub>NNaO<sub>3</sub> [M+Na<sup>+</sup>]: 440.0791; Found: 440.0787.



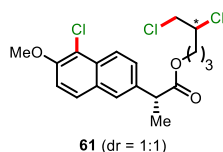

Compound **61** was isolated in 61% yield following the general conditions B.  $^1\text{H NMR}$  (500 MHz,  $\text{CDCl}_3$ )  $\delta$  8.18 (d,  $J = 8.8$  Hz, 1H), 7.75 (d,  $J = 9.0$  Hz, 1H), 7.70 (s, 1H), 7.52 (d,  $J = 8.8$  Hz, 1H), 7.30 (d,  $J = 9.0$  Hz, 1H), 4.19 – 4.07 (m, 2H), 4.03 (s, 3H), 3.94 – 3.84 (m, 2H), 3.61 (dd,  $J = 10.9, 4.5$  Hz, 1H), 3.49 – 3.42 (m, 1H), 1.95 – 1.81 (m, 2H), 1.76 – 1.65 (m, 1H), 1.63 – 1.55 (m, 4H).  $^{13}\text{C NMR}$  (126 MHz,  $\text{CDCl}_3$ )  $\delta$  174.43, 152.71, 136.56, 131.23, 129.64, 127.96, 127.95, 127.57, 127.55, 126.33, 126.30, 124.21, 124.20, 117.00, 114.19, 64.07, 63.97, 60.46, 57.15, 48.00, 45.47, 31.69, 31.60, 25.25, 25.23, 18.32. **HRMS** Calcd for  $\text{C}_{19}\text{H}_{21}\text{Cl}_3\text{NaO}_3$  [ $\text{M}+\text{Na}^+$ ]: 425.0448; Found: 425.0448.

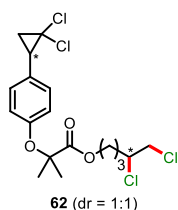

Compound **62** was isolated in 57% yield following the general conditions A.  $^1\text{H NMR}$  (500 MHz,  $\text{CDCl}_3$ )  $\delta$  7.11 (d,  $J = 8.7$  Hz, 2H), 6.79 (d,  $J = 8.6$  Hz, 2H), 4.24 – 4.15 (m, 2H), 3.98 – 3.91 (m, 1H), 3.67 (dd,  $J = 11.3, 5.1$  Hz, 1H), 3.52 (dd,  $J = 11.3, 7.6$  Hz, 1H), 2.82 (dd,  $J = 10.5, 8.5$  Hz, 1H), 1.97 – 1.84 (m, 3H), 1.79 – 1.63 (m, 3H), 1.61 (s, 6H).  $^{13}\text{C NMR}$  (126 MHz,  $\text{CDCl}_3$ )  $\delta$  174.33, 155.11, 129.82, 128.20, 118.36, 79.22, 64.63, 61.01, 60.47, 48.08, 34.93, 31.61, 25.99, 25.59, 25.57, 25.17. **HRMS** Calcd for  $\text{C}_{18}\text{H}_{22}\text{Cl}_4\text{NaO}_3$  [ $\text{M}+\text{Na}^+$ ]: 449.0215; Found: 449.0216.

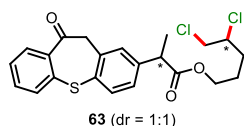

Compound **63** was isolated in 56% yield following the general conditions B.  $^1\text{H NMR}$  (500 MHz,  $\text{CDCl}_3$ )  $\delta$  8.19 (d,  $J = 8.0$  Hz, 1H), 7.60 (d,  $J = 8.0$  Hz, 2H), 7.42 (t,  $J = 7.6$  Hz, 1H), 7.38 (s, 1H), 7.31 (t,  $J = 7.6$  Hz, 1H), 7.14 (d,  $J = 8.0$  Hz, 1H), 4.36 (s, 2H), 4.15 – 4.05 (m, 2H), 3.95 – 3.89 (m, 1H), 3.74 – 3.70 (m, 1H), 3.65 (dd,  $J = 11.3, 5.0$  Hz, 1H), 3.51 (dd,  $J = 11.2, 7.8$  Hz, 1H), 1.95 – 1.80 (m, 2H), 1.73 – 1.65 (m, 1H), 1.64 – 1.58 (m, 1H), 1.48 (d,  $J = 7.1$  Hz, 3H).  $^{13}\text{C NMR}$  (126 MHz,  $\text{CDCl}_3$ )  $\delta$  191.44, 173.92,

142.77, 140.32, 138.12, 136.27, 133.45, 132.67, 131.66, 130.99, 128.75, 127.00, 126.46, 64.15, 64.08, 60.44, 51.19, 48.02, 45.34, 31.67, 31.60, 25.18, 18.37. **HRMS** Calcd for C<sub>22</sub>H<sub>22</sub>Cl<sub>2</sub>NaO<sub>3</sub>S [M+Na<sup>+</sup>]: 459.0559; Found: 459.0560.

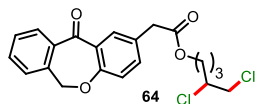

Compound **64** was isolated in 50% yield following the general conditions A. **<sup>1</sup>H NMR** (500 MHz, CDCl<sub>3</sub>) δ 8.12 (s, 1H), 7.89 (d, *J* = 7.7 Hz, 1H), 7.56 (t, *J* = 7.4 Hz, 1H), 7.47 (t, *J* = 7.6 Hz, 1H), 7.42 (dd, *J* = 8.4, 2.3 Hz, 1H), 7.36 (d, *J* = 7.4 Hz, 1H), 7.03 (d, *J* = 8.4 Hz, 1H), 5.18 (s, 2H), 4.21 – 4.11 (m, 2H), 4.04 – 3.99 (m, 1H), 3.74 (dd, *J* = 11.3, 5.0 Hz, 1H), 3.66 – 3.59 (m, 3H), 2.08 – 2.01 (m, 1H), 1.97 – 1.89 (m, 1H), 1.81 – 1.69 (m, 2H). **<sup>13</sup>C NMR** (126 MHz, CDCl<sub>3</sub>) δ 190.91, 171.42, 160.60, 140.51, 136.41, 135.65, 132.91, 132.52, 129.59, 129.38, 127.93, 127.85, 125.27, 121.22, 73.74, 64.15, 60.54, 48.11, 40.40, 31.73, 25.24. **HRMS** Calcd for C<sub>21</sub>H<sub>20</sub>Cl<sub>2</sub>NaO<sub>4</sub> [M+Na<sup>+</sup>]: 429.0631; Found: 429.0630.

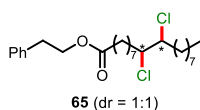

Compound **65** was isolated in 41% yield following the general conditions B. **<sup>1</sup>H NMR** (500 MHz, CDCl<sub>3</sub>) δ 7.33 – 7.28 (m, 2H), 7.26 – 7.20 (m, 3H), 4.29 (t, *J* = 7.0 Hz, 2H), 4.00 (dd, *J* = 30.5, 6.9 Hz, 2H), 2.94 (t, *J* = 7.0 Hz, 2H), 2.28 (t, *J* = 7.5 Hz, 2H), 1.99 – 1.87 (m, 2H), 1.84 – 1.73 (m, 2H), 1.65 – 1.50 (m, 4H), 1.29 (s, 18H), 0.89 (t, *J* = 6.8 Hz, 3H). **<sup>13</sup>C NMR** (126 MHz, CDCl<sub>3</sub>) δ 173.85, 138.00, 129.03, 128.60, 126.66, 66.27, 66.21, 65.74, 65.69, 64.85, 35.28, 34.89, 34.80, 34.55, 34.52, 34.41, 31.98, 29.54, 29.53, 29.35, 29.19, 29.17, 29.10, 28.95, 26.86, 26.79, 26.23, 26.15, 24.99, 22.80, 14.25. **HRMS** Calcd for C<sub>26</sub>H<sub>43</sub>Cl<sub>2</sub>O<sub>2</sub> [M+H<sup>+</sup>]: 457.2635; Found: 457.2634.

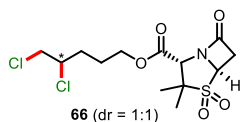

Compound **66** was isolated in 66% yield following the general conditions B. **<sup>1</sup>H NMR** (500 MHz, CDCl<sub>3</sub>) δ 4.62 (t, 1H), 4.40 (s, 1H), 4.27 (t, *J* = 5.4 Hz, 2H), 4.10 – 4.03 (m, 1H), 3.81 (dd, *J* = 11.3, 4.5 Hz, 1H), 3.64 (dd, *J* = 11.3, 8.3 Hz, 1H), 3.48 (dd, *J* = 8.4,

3.0 Hz, 2H), 2.18 – 2.10 (m, 1H), 2.05 – 1.96 (m, 1H), 1.89 – 1.75 (m, 2H), 1.62 (s, 3H), 1.43 (s, 3H).  $^{13}\text{C NMR}$  (126 MHz,  $\text{CDCl}_3$ )  $\delta$  170.83, 167.08, 65.69, 63.43, 62.84, 61.26, 60.15, 60.02, 47.83, 47.76, 38.51, 31.63, 31.53, 25.15, 25.08, 20.57, 20.55, 18.81. **HRMS** Calcd for  $\text{C}_{13}\text{H}_{19}\text{Cl}_2\text{NNaO}_5\text{S}$  [ $\text{M}+\text{Na}^+$ ]: 394.0253; Found: 394.0253.

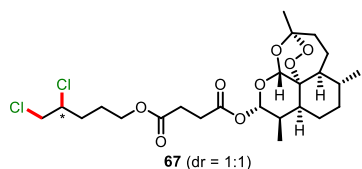

Alkene (**67s**) (0.2 mmol, 1.0 equiv),  $\text{NaNO}_2$  (0.2 mmol, 1.0 equiv) and  $\text{HCl}$  (100  $\mu\text{L}$ , aq. 37% in water) were dispersed in  $\text{PhCl}$  (2.0 mL) in a 4 mL glass vial at room temperature. The reaction vial was sealed with a PTEF cap and the reaction mixture vigorously stirred at 30 °C under the 24 W blue LEDs irradiation for 0.5 h (It is worth noting that 24 W blue LEDs was positioned 5 cm aside from the reaction vials.). Then, the reaction mixture was extracted with  $\text{CH}_2\text{Cl}_2$  ( $3 \times 2$  mL). The combined organic layer was dried over anhydrous  $\text{Na}_2\text{SO}_4$ , filtered and concentrated. The residue was purified by chromatography on silica gel to afford the desired dichlorination products. Compound **67** was isolated in 51% yield.  $^1\text{H NMR}$  (500 MHz,  $\text{CDCl}_3$ )  $\delta$  5.79 (d,  $J = 9.8$  Hz, 1H), 5.43 (s, 1H), 4.21 – 4.10 (m, 2H), 4.10 – 4.02 (m, 1H), 3.78 (dd,  $J = 11.3$ , 3.7 Hz, 1H), 3.66 (dd,  $J = 11.3$ , 7.6 Hz, 1H), 2.76 – 2.70 (m, 2H), 2.70 – 2.52 (m, 3H), 2.37 (td,  $J = 14.0$ , 3.9 Hz, 1H), 2.11 – 2.01 (m, 2H), 1.96 – 1.86 (m, 2H), 1.82 – 1.69 (m, 4H), 1.43 (s, 3H), 1.37 – 1.25 (m, 5H), 1.05 – 0.98 (m, 1H), 0.96 (d,  $J = 6.0$  Hz, 3H), 0.85 (d,  $J = 7.1$  Hz, 3H).  $^{13}\text{C NMR}$  (126 MHz,  $\text{CDCl}_3$ )  $\delta$  172.22, 172.20, 171.30, 171.28, 104.62, 92.35, 91.66, 80.26, 63.96, 63.90, 60.68, 60.54, 58.63, 51.71, 48.24, 45.38, 37.42, 36.36, 34.23, 31.95, 31.78, 31.74, 29.35, 29.02, 26.10, 25.31, 24.73, 22.15, 21.20, 20.35, 18.58, 14.35, 12.20. **HRMS** Calcd for  $\text{C}_{24}\text{H}_{36}\text{Cl}_2\text{NaO}_8$  [ $\text{M}+\text{Na}^+$ ]: 545.1679; Found: 545.1685.

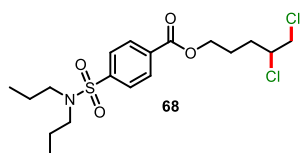

Compound **68** was isolated in 43% yield following the general conditions A.  $^1\text{H NMR}$  (500 MHz,  $\text{CDCl}_3$ )  $\delta$  8.15 (d,  $J = 8.3$  Hz, 2H), 7.88 (d,  $J = 8.3$  Hz, 2H), 4.41 (t,  $J = 5.8$  Hz, 2H), 4.16 – 4.08 (m, 1H), 3.82 (dd,  $J = 11.3$ , 4.8 Hz, 1H), 3.67 (dd,  $J = 11.2$ , 8.1

Hz, 1H), 3.10 (t, 4H), 2.25 – 2.18 (m, 1H), 2.14 – 2.06 (m, 1H), 1.97 – 1.85 (m, 2H), 1.57 – 1.51 (m, 4H), 0.87 (t,  $J = 7.4$  Hz, 6H).<sup>15</sup>

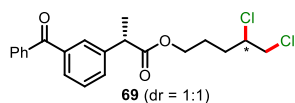

Compound **69** was isolated in 52% yield following the general conditions A. **<sup>1</sup>H NMR** (500 MHz, CDCl<sub>3</sub>)  $\delta$  7.80 (d,  $J = 7.3$  Hz, 2H), 7.76 (s, 1H), 7.67 (d,  $J = 7.6$  Hz, 1H), 7.60 (t,  $J = 7.4$  Hz, 1H), 7.54 (d,  $J = 7.7$  Hz, 1H), 7.49 (t,  $J = 7.6$  Hz, 2H), 7.44 (t,  $J = 7.7$  Hz, 1H), 4.17 – 4.09 (m, 2H), 3.99 – 3.93 (m, 1H), 3.83 – 3.77 (m, 1H), 3.71 (dd,  $J = 11.3, 4.9$  Hz, 1H), 3.57 (dd,  $J = 11.3, 7.7$  Hz, 1H), 2.01 – 1.94 (m, 1H), 1.92 – 1.84 (m, 1H), 1.77 – 1.64 (m, 2H), 1.54 (d,  $J = 7.2$  Hz, 3H). **<sup>13</sup>C NMR** (126 MHz, CDCl<sub>3</sub>)  $\delta$  196.58, 196.57, 174.09, 140.93, 138.07, 138.06, 137.61, 137.59, 132.66, 132.65, 131.61, 130.18, 129.28, 129.22, 128.69, 128.45, 128.44, 64.12, 64.07, 60.47, 60.46, 48.05, 45.55, 31.67, 31.62, 25.22, 18.45. **HRMS** Calcd for C<sub>21</sub>H<sub>23</sub>Cl<sub>2</sub>O<sub>3</sub> [M+H<sup>+</sup>]: 393.1019; Found: 393.1020.

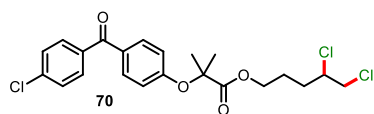

Compound **70** was isolated in 54% yield following the general conditions A. **<sup>1</sup>H NMR** (500 MHz, CDCl<sub>3</sub>)  $\delta$  7.74 (d,  $J = 8.7$  Hz, 2H), 7.70 (d,  $J = 8.4$  Hz, 2H), 7.44 (d,  $J = 8.3$  Hz, 2H), 6.85 (d,  $J = 8.7$  Hz, 2H), 4.21 (t,  $J = 5.5$  Hz, 2H), 3.96 – 3.90 (m, 1H), 3.68 (dd,  $J = 11.3, 4.9$  Hz, 1H), 3.51 (dd,  $J = 11.3, 7.9$  Hz, 1H), 1.96 – 1.83 (m, 2H), 1.77 – 1.70 (m, 1H), 1.68 (s, 6H), 1.63 – 1.57 (m, 1H). **<sup>13</sup>C NMR** (126 MHz, CDCl<sub>3</sub>)  $\delta$  194.25, 173.78, 159.76, 138.52, 136.44, 132.20, 131.28, 130.52, 128.68, 117.19, 79.51, 64.90, 60.29, 47.95, 31.55, 25.59, 25.16. **HRMS** Calcd for C<sub>22</sub>H<sub>23</sub>Cl<sub>3</sub>NaO<sub>4</sub> [M+Na<sup>+</sup>]: 479.0554; Found: 479.0555.

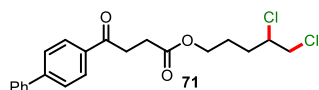

Compound **71** was isolated in 70% yield following the general conditions B. **<sup>1</sup>H NMR** (500 MHz, CDCl<sub>3</sub>)  $\delta$  8.06 (d,  $J = 8.0$  Hz, 2H), 7.70 (d,  $J = 8.0$  Hz, 2H), 7.63 (d,  $J = 7.6$  Hz, 2H), 7.48 (t,  $J = 7.5$  Hz, 2H), 7.41 (t,  $J = 7.3$  Hz, 1H), 4.23 – 4.12 (m, 2H), 4.11 – 4.01 (m, 1H), 3.77 (dd,  $J = 11.4, 5.1$  Hz, 1H), 3.65 (dd,  $J = 11.4, 7.5$  Hz, 1H), 3.36 (t,  $J$

= 6.5 Hz, 2H), 2.80 (t,  $J = 6.5$  Hz, 2H), 2.16 – 2.05 (m, 1H), 2.03 – 1.90 (m, 1H), 1.85 – 1.73 (m, 2H).  $^{13}\text{C NMR}$  (126 MHz,  $\text{CDCl}_3$ )  $\delta$  197.77, 172.99, 146.09, 139.96, 135.34, 129.10, 128.77, 128.40, 127.42, 127.41, 63.85, 60.67, 48.22, 33.52, 31.78, 28.41, 25.34. **HRMS** Calcd for  $\text{C}_{21}\text{H}_{23}\text{Cl}_2\text{O}_3$  [ $\text{M}+\text{H}^+$ ]: 393.1019; Found: 393.1020.

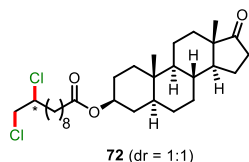

Compound **72** was isolated in 55% yield following the general conditions B.  $^1\text{H NMR}$  (500 MHz,  $\text{CDCl}_3$ )  $\delta$  4.73 – 4.65 (m, 1H), 4.06 – 3.99 (m, 1H), 3.75 (dd,  $J = 11.3, 5.2$  Hz, 1H), 3.64 (dd,  $J = 11.3, 7.4$  Hz, 1H), 2.43 (dd,  $J = 19.3, 8.8$  Hz, 1H), 2.25 (t,  $J = 7.5$  Hz, 2H), 2.07 (dd,  $J = 19.0, 9.4$  Hz, 1H), 2.01 – 1.89 (m, 2H), 1.84 – 1.68 (m, 5H), 1.64 – 1.56 (m, 5H), 1.55 – 1.47 (m, 3H), 1.39 – 1.21 (m, 16H), 1.07 – 0.94 (m, 2H), 0.85 (d,  $J = 2.5$  Hz, 6H), 0.71 (td,  $J = 11.4, 3.8$  Hz, 1H).  $^{13}\text{C NMR}$  (126 MHz,  $\text{CDCl}_3$ )  $\delta$  221.38, 173.54, 73.37, 61.36, 54.48, 51.53, 48.39, 47.93, 44.82, 36.87, 36.00, 35.82, 35.20, 35.17, 34.86, 34.15, 31.68, 30.97, 29.32, 29.25, 29.18, 29.03, 28.44, 27.61, 25.91, 25.17, 21.93, 20.62, 13.97, 12.37. **HRMS** Calcd for  $\text{C}_{30}\text{H}_{48}\text{Cl}_2\text{NaO}_3$  [ $\text{M}+\text{Na}^+$ ]: 549.2873; Found: 549.2875.

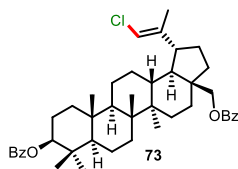

Compound **73** was isolated in 30% yield following the general conditions B.  $^1\text{H NMR}$  (500 MHz,  $\text{CDCl}_3$ )  $\delta$  8.09 – 8.02 (m, 4H), 7.59 – 7.52 (m, 2H), 7.48 – 7.42 (m, 4H), 5.84 (s, 0.5H), 5.67 (s, 0.4H), 4.76 – 4.69 (m, 1H), 4.58 (d,  $J = 11.1$  Hz, 0.4H), 4.51 (d,  $J = 11.1$  Hz, 0.6H), 4.18 – 4.05 (m, 1H), 3.39 – 3.21 (m, 0.4H), 2.66 – 2.56 (m, 0.6H), 2.04 – 1.92 (m, 3H), 1.86 – 1.67 (m, 10H), 1.55 (m, 1H), 1.51 – 1.39 (m, 5H), 1.34 (t,  $J = 13.6$  Hz, 3H), 1.23 – 1.17 (m, 1H), 1.09 (d,  $J = 10.8$  Hz, 6H), 1.00 (s, 6H), 0.94 – 0.85 (m, 7H).  $^{13}\text{C NMR}$  (126 MHz,  $\text{CDCl}_3$ )  $\delta$  167.04, 166.41, 142.86, 142.22, 133.10, 133.04, 132.84, 131.10, 130.55, 130.48, 129.71, 129.68, 129.65, 128.54, 128.51, 128.44, 111.95, 110.90, 81.69, 81.65, 63.52, 63.27, 55.60, 55.56, 50.44, 50.29, 49.01, 48.94, 47.15, 46.96, 46.70, 42.93, 41.05, 40.22, 38.54, 38.34, 37.62, 37.51, 37.28, 37.25, 35.26, 34.83, 34.26, 34.22, 30.29, 30.09, 28.83, 28.25, 27.52, 27.25, 27.17, 25.05, 24.87,

23.89, 21.03, 20.94, 18.32, 17.46, 16.93, 16.31, 16.29, 16.25, 16.19, 14.88, 14.85, 13.44.

**HRMS** Calcd for C<sub>44</sub>H<sub>57</sub>ClNaO<sub>4</sub> [M+Na<sup>+</sup>]: 707.3838; Found: 707.3840.

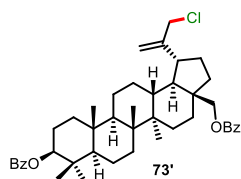

Compound **73'** was isolated in 24% yield following the general conditions B. **<sup>1</sup>H NMR** (500 MHz, CDCl<sub>3</sub>) δ 8.05 (t, *J* = 8.4 Hz, 4H), 7.61 – 7.51 (m, 2H), 7.49 – 7.38 (m, 4H), 5.13 (s, 1H), 5.06 (s, 1H), 4.76 – 4.67 (m, 1H), 4.61 – 4.48 (m, 1H), 4.21 – 4.03 (m, 3H), 2.68 – 2.45 (m, 1H), 2.34 – 2.19 (m, 1H), 2.04 – 1.92 (m, 2H), 1.87 – 1.68 (m, 6H), 1.58 – 1.52 (m, 1H), 1.52 – 1.37 (m, 6H), 1.36 – 1.23 (m, 6H), 1.20 – 1.12 (m, 2H), 1.09 (s, 3H), 1.04 (s, 3H), 1.00 (s, 3H), 0.92 (s, 3H), 0.91 (s, 3H). **<sup>13</sup>C NMR** (126 MHz, CDCl<sub>3</sub>) δ 167.05, 166.43, 150.51, 133.07, 132.84, 131.11, 130.52, 129.70, 129.66, 128.54, 128.45, 112.76, 81.68, 63.20, 60.53, 55.58, 50.40, 50.23, 48.58, 46.91, 42.90, 41.13, 38.55, 38.35, 37.71, 37.27, 34.62, 34.31, 32.26, 30.19, 28.26, 27.26, 27.16, 23.89, 21.12, 18.33, 16.94, 16.33, 16.26, 14.95. **HRMS** Calcd for C<sub>44</sub>H<sub>57</sub>ClNaO<sub>4</sub> [M+Na<sup>+</sup>]: 707.3838; Found: 707.3822.

## 6. General procedures and substrate scope of dibromination reactions

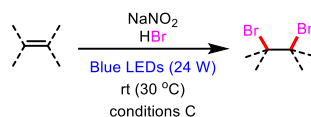

**Scheme S20.** General procedures and substrate scope of dibromination reactions

**General conditions C:** Substrate alkenes (0.2 mmol, 1.0 equiv), NaNO<sub>2</sub> (0.2 mmol, 1.0 equiv) and HBr (100  $\mu$ L, aq. 40% in water) were dispersed in CH<sub>2</sub>Cl<sub>2</sub> (2.0 mL) in a 4 mL glass vial at room temperature. The reaction vial was sealed with a PTEF cap and the reaction mixture vigorously stirred at 30 °C under the 24 W blue LEDs irradiation for 12 h (It is worth noting that 24 W blue LEDs was positioned 5 cm aside from the reaction vials.). Then, the reaction mixture was extracted with CH<sub>2</sub>Cl<sub>2</sub> (3  $\times$  2 mL). The combined organic layer was dried over anhydrous Na<sub>2</sub>SO<sub>4</sub>, filtered and concentrated.

The residue was purified by chromatography on silica gel to afford the desired dibromination products.

### 6.1 Visible-light-induced vicinal dibromination of alkenes

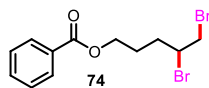

Compound **74** was isolated in 79% yield following the general conditions C.  $^1\text{H NMR}$  (500 MHz,  $\text{CDCl}_3$ )  $\delta$  8.05 (d,  $J = 6.9$  Hz, 2H), 7.56 (t,  $J = 7.5$  Hz, 1H), 7.45 (t,  $J = 7.8$  Hz, 2H), 4.38 (t,  $J = 6.1$  Hz, 2H), 4.27 – 4.20 (m, 1H), 3.88 (dd,  $J = 10.3, 4.3$  Hz, 1H), 3.65 (t,  $J = 10.1$  Hz, 1H), 2.42 – 2.34 (m, 1H), 2.15 – 2.05 (m, 1H), 2.00 – 1.89 (m, 2H).<sup>21</sup>

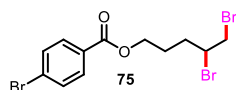

Compound **75** was isolated in 77% yield following the general conditions C.  $^1\text{H NMR}$  (500 MHz,  $\text{CDCl}_3$ )  $\delta$  7.90 (d,  $J = 8.3$  Hz, 2H), 7.59 (d,  $J = 8.3$  Hz, 2H), 4.37 (t,  $J = 6.0$  Hz, 2H), 4.26 – 4.19 (m, 1H), 3.88 (dd,  $J = 10.3, 4.2$  Hz, 1H), 3.64 (t,  $J = 10.2$  Hz, 1H), 2.41 – 2.31 (m, 1H), 2.14 – 2.05 (m, 1H), 1.99 – 1.87 (m, 2H).<sup>22</sup>

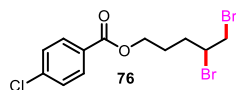

Compound **76** was isolated in 70% yield following the general conditions C.  $^1\text{H NMR}$  (500 MHz,  $\text{CDCl}_3$ )  $\delta$  7.98 (d,  $J = 8.5$  Hz, 2H), 7.42 (d,  $J = 8.4$  Hz, 2H), 4.37 (t,  $J = 6.0$  Hz, 2H), 4.26 – 4.20 (m, 1H), 3.88 (dd,  $J = 10.3, 4.3$  Hz, 1H), 3.64 (t,  $J = 10.2$  Hz, 1H), 2.40 – 2.31 (m, 1H), 2.17 – 2.04 (m, 1H), 1.99 – 1.85 (m, 2H).<sup>22</sup>

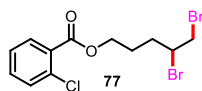

Compound **77** was isolated in 61% yield following the general conditions C.  $^1\text{H NMR}$  (500 MHz,  $\text{CDCl}_3$ )  $\delta$  7.83 (d,  $J = 7.7$  Hz, 1H), 7.50 – 7.39 (m, 2H), 7.32 (t,  $J = 7.4$  Hz, 1H), 4.39 (t,  $J = 5.8$  Hz, 2H), 4.25 – 4.19 (m, 1H), 3.87 (dd,  $J = 10.3, 4.3$  Hz, 1H), 3.63 (t,  $J = 10.1$  Hz, 1H), 2.42 – 2.36 (m, 1H), 2.13 – 2.04 (m, 1H), 1.99 – 1.85 (m, 2H).  $^{13}\text{C}$

**NMR** (126 MHz, CDCl<sub>3</sub>)  $\delta$  165.87, 133.77, 132.71, 131.56, 131.21, 130.24, 126.73, 64.61, 52.08, 36.04, 32.96, 26.33. **HRMS** Calcd for C<sub>12</sub>H<sub>13</sub>Br<sub>2</sub>ClNaO<sub>2</sub> [M+Na<sup>+</sup>]: 404.8863; Found: 404.8864.

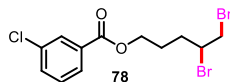

Compound **78** was isolated in 62% yield following the general conditions C. **<sup>1</sup>H NMR** (500 MHz, CDCl<sub>3</sub>)  $\delta$  8.01 (s, 1H), 7.92 (d, *J* = 7.8 Hz, 1H), 7.53 (d, *J* = 7.0 Hz, 1H), 7.38 (t, *J* = 7.9 Hz, 1H), 4.38 (t, *J* = 6.2 Hz, 2H), 4.25 – 4.19 (m, 1H), 3.88 (dd, *J* = 10.3, 4.3 Hz, 1H), 3.64 (t, *J* = 10.2 Hz, 1H), 2.40 – 2.31 (m, 1H), 2.13 – 2.04 (m, 1H), 1.98 – 1.88 (m, 2H). **<sup>13</sup>C NMR** (126 MHz, CDCl<sub>3</sub>)  $\delta$  165.43, 134.73, 133.17, 132.05, 129.87, 129.82, 127.84, 64.40, 51.91, 35.96, 32.83, 26.32. **HRMS** Calcd for C<sub>12</sub>H<sub>13</sub>Br<sub>2</sub><sup>37</sup>ClNaO<sub>2</sub> [M+Na<sup>+</sup>]: 406.8833; Found: 406.8836.

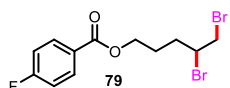

Compound **79** was isolated in 63% yield following the general conditions C. **<sup>1</sup>H NMR** (500 MHz, CDCl<sub>3</sub>)  $\delta$  8.06 (dd, *J* = 8.7, 5.6 Hz, 2H), 7.11 (t, *J* = 8.6 Hz, 2H), 4.37 (t, *J* = 6.1 Hz, 2H), 4.26 – 4.20 (m, 1H), 3.88 (dd, *J* = 10.3, 4.3 Hz, 1H), 3.64 (t, *J* = 10.2 Hz, 1H), 2.41 – 2.31 (m, 1H), 2.12 – 2.05 (m, 1H), 1.99 – 1.88 (m, 2H). **<sup>13</sup>C NMR** (126 MHz, CDCl<sub>3</sub>)  $\delta$  166.94, 165.68, 164.92, 132.30, 132.22, 126.53, 126.51, 115.78, 115.61, 64.13, 51.98, 36.00, 32.87, 26.35. **<sup>19</sup>F NMR** (471 MHz, CDCl<sub>3</sub>)  $\delta$  -105.57 – -105.61. (m, 1F) **HRMS** Calcd for C<sub>12</sub>H<sub>13</sub>Br<sub>2</sub>FNaO<sub>2</sub> [M+Na<sup>+</sup>]: 388.9159; Found: 388.9142.

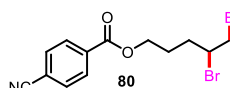

Compound **80** was isolated in 66% yield following the general conditions C. **<sup>1</sup>H NMR** (500 MHz, CDCl<sub>3</sub>)  $\delta$  8.14 (d, *J* = 8.1 Hz, 2H), 7.75 (d, *J* = 8.1 Hz, 2H), 4.41 (t, *J* = 6.0 Hz, 2H), 4.26 – 4.18 (m, 1H), 3.88 (dd, *J* = 10.3, 4.3 Hz, 1H), 3.63 (t, *J* = 10.2 Hz, 1H), 2.42 – 2.31 (m, 1H), 2.16 – 2.07 (m, 1H), 2.01 – 1.86 (m, 2H). **<sup>13</sup>C NMR** (126 MHz, CDCl<sub>3</sub>)  $\delta$  164.96, 134.03, 132.39, 130.21, 118.06, 116.59, 64.79, 51.75, 35.89, 32.72, 26.19. **HRMS** Calcd for C<sub>13</sub>H<sub>13</sub>Br<sub>2</sub>NNaO<sub>2</sub> [M+Na<sup>+</sup>]: 395.9205; Found: 395.9207.



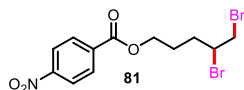

Compound **81** was isolated in 76% yield following the general conditions C.  $^1\text{H NMR}$  (500 MHz,  $\text{CDCl}_3$ )  $\delta$  8.29 (d,  $J = 8.8$  Hz, 2H), 8.21 (d,  $J = 8.8$  Hz, 2H), 4.43 (t,  $J = 6.1$  Hz, 2H), 4.26 – 4.19 (m, 1H), 3.89 (dd,  $J = 10.3, 4.3$  Hz, 1H), 3.64 (t,  $J = 10.3$  Hz, 1H), 2.41 – 2.32 (m, 1H), 2.18 – 2.06 (m, 1H), 2.02 – 1.89 (m, 2H).  $^{13}\text{C NMR}$  (126 MHz,  $\text{CDCl}_3$ )  $\delta$  164.72, 150.71, 135.61, 130.84, 123.72, 64.94, 51.73, 35.88, 32.73, 26.20. **HRMS** Calcd for  $\text{C}_{12}\text{H}_{13}\text{Br}_2\text{NNaO}_4$  [ $\text{M}+\text{Na}^+$ ]: 415.9104; Found: 415.9115.

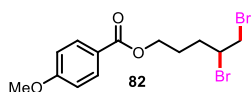

Compound **82** was isolated in 70% yield following the general conditions C.  $^1\text{H NMR}$  (500 MHz,  $\text{CDCl}_3$ )  $\delta$  8.00 (d,  $J = 8.9$  Hz, 2H), 6.92 (d,  $J = 8.8$  Hz, 2H), 4.34 (t,  $J = 6.0$  Hz, 2H), 4.27 – 4.18 (m, 1H), 3.88 (dd,  $J = 10.4, 4.4$  Hz, 1H), 3.86 (s, 3H), 3.64 (t,  $J = 10.1$  Hz, 1H), 2.42 – 2.29 (m, 1H), 2.17 – 2.02 (m, 1H), 1.99 – 1.83 (m, 2H).  $^{13}\text{C NMR}$  (126 MHz,  $\text{CDCl}_3$ )  $\delta$  166.37, 163.51, 131.72, 122.67, 113.76, 63.66, 55.55, 52.15, 36.08, 32.92, 26.39. **HRMS** Calcd for  $\text{C}_{13}\text{H}_{16}^{81}\text{Br}^{79}\text{BrNaO}_3$  [ $\text{M}+\text{Na}^+$ ]: 402.9338; Found: 402.9337.

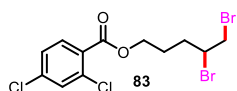

Compound **83** was isolated in 70% yield following the general conditions C.  $^1\text{H NMR}$  (500 MHz,  $\text{CDCl}_3$ )  $\delta$  7.81 (d,  $J = 8.4$  Hz, 1H), 7.47 (s, 1H), 7.31 (d,  $J = 8.4$  Hz, 1H), 4.39 (t,  $J = 5.7$  Hz, 2H), 4.24 – 4.18 (m, 1H), 3.88 (dd,  $J = 10.3, 4.3$  Hz, 1H), 3.63 (t,  $J = 10.2$  Hz, 1H), 2.42 – 2.32 (m, 1H), 2.12 – 2.03 (m, 1H), 1.99 – 1.87 (m, 2H).  $^{13}\text{C NMR}$  (126 MHz,  $\text{CDCl}_3$ )  $\delta$  164.94, 138.53, 135.01, 132.71, 131.17, 128.42, 127.19, 64.81, 51.95, 35.97, 32.91, 26.27. **HRMS** Calcd for  $\text{C}_{12}\text{H}_{12}\text{Br}_2\text{Cl}_2\text{NaO}_2$  [ $\text{M}+\text{Na}^+$ ]: 438.8473; Found: 438.8454.

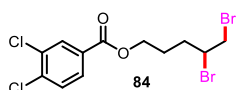

Compound **84** was isolated in 70% yield following the general conditions C.  $^1\text{H NMR}$  (500 MHz,  $\text{CDCl}_3$ )  $\delta$  8.11 (s, 1H), 7.86 (d,  $J = 8.3$  Hz, 1H), 7.52 (d,  $J = 8.4$  Hz, 1H), 4.38 (t,  $J = 6.2$  Hz, 2H), 4.25 – 4.19 (m, 1H), 3.88 (dd,  $J = 10.3, 4.3$  Hz, 1H), 3.64 (t,  $J$

= 10.2 Hz, 1H), 2.39 – 2.32 (m, 1H), 2.13 – 2.05 (m, 1H), 1.98 – 1.88 (m, 2H).  $^{13}\text{C}$  NMR (126 MHz,  $\text{CDCl}_3$ )  $\delta$  164.77, 137.81, 133.11, 131.66, 130.71, 130.08, 128.77, 64.59, 51.81, 35.91, 32.73, 26.24. HRMS Calcd for  $\text{C}_{12}\text{H}_{13}\text{Br}_2\text{Cl}_2\text{O}_2$  [ $\text{M}+\text{H}^+$ ]: 416.8654; Found: 416.8656.

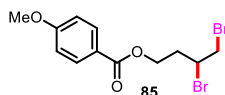

Compound **85** was isolated in 57% yield following the general conditions C.  $^1\text{H}$  NMR (500 MHz,  $\text{CDCl}_3$ )  $\delta$  8.00 (d,  $J = 8.8$  Hz, 2H), 6.93 (d,  $J = 8.8$  Hz, 2H), 4.60 – 4.53 (m, 1H), 4.48 – 4.42 (m, 1H), 4.39 – 4.30 (m, 1H), 3.92 (dd,  $J = 10.4, 4.3$  Hz, 1H), 3.86 (s, 3H), 3.71 (t,  $J = 10.0$  Hz, 1H), 2.72 – 2.65 (m, 1H), 2.23 – 2.15 (m, 1H).  $^{13}\text{C}$  NMR (126 MHz,  $\text{CDCl}_3$ )  $\delta$  166.20, 163.65, 131.80, 122.43, 113.84, 62.19, 55.59, 48.80, 36.30, 35.54. HRMS Calcd for  $\text{C}_{12}\text{H}_{14}\text{Br}_2\text{NaO}_3$  [ $\text{M}+\text{Na}^+$ ]: 386.9202; Found: 386.9196.

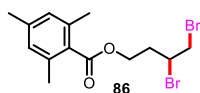

Compound **86** was isolated in 35% yield following the general conditions C.  $^1\text{H}$  NMR (500 MHz,  $\text{CDCl}_3$ )  $\delta$  6.87 (s, 2H), 4.65 – 4.57 (m, 1H), 4.51 – 4.42 (m, 1H), 4.38 – 4.27 (m, 1H), 3.90 (dd,  $J = 10.4, 4.3$  Hz, 1H), 3.66 (t,  $J = 10.1$  Hz, 1H), 2.76 – 2.65 (m, 1H), 2.30 (s, 6H), 2.29 (s, 3H), 2.12 – 2.03 (m, 1H).  $^{13}\text{C}$  NMR (126 MHz,  $\text{CDCl}_3$ )  $\delta$  169.99, 139.66, 135.32, 130.72, 128.59, 62.37, 48.72, 36.24, 35.51, 21.27, 20.05. HRMS Calcd for  $\text{C}_{14}\text{H}_{18}\text{Br}_2\text{NaO}_2$  [ $\text{M}+\text{Na}^+$ ]: 398.9566; Found: 398.9567.

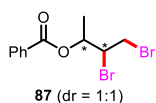

Compound **87** was isolated in 45% yield following the general conditions C (the recovery of starting material is 31%).  $^1\text{H}$  NMR (500 MHz,  $\text{CDCl}_3$ )  $\delta$  8.07 (t,  $J = 8.1$  Hz, 2H), 7.63 – 7.55 (m, 1H), 7.51 – 7.43 (m, 2H), 5.61 – 5.56 (m, 0.52H), 5.55 – 5.50 (m, 0.44H), 4.62 – 4.45 (m, 0.41H), 4.41 – 4.20 (m, 0.49H), 3.86 – 3.64 (m, 2H), 1.52 (d,  $J = 6.2$  Hz, 1.51H), 1.47 (d,  $J = 6.3$  Hz, 1.51H).  $^{13}\text{C}$  NMR (126 MHz,  $\text{CDCl}_3$ )  $\delta$  165.43, 165.38, 133.49, 133.45, 129.93, 129.91, 129.84, 129.75, 128.65, 128.61, 70.42, 68.72, 55.38, 54.58, 32.20, 31.91, 19.24, 15.49. HRMS Calcd for  $\text{C}_{11}\text{H}_{13}\text{Br}_2\text{O}_2$  [ $\text{M}+\text{H}^+$ ]: 334.9277; Found: 334.9277.

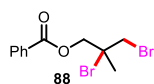

Compound **88** was isolated in 30% yield following the general conditions C (the recovery of starting material is 50%).  $^1\text{H NMR}$  (500 MHz,  $\text{CDCl}_3$ )  $\delta$  8.08 (d,  $J = 6.9$  Hz, 2H), 7.60 (t,  $J = 7.5$  Hz, 1H), 7.48 (t,  $J = 7.9$  Hz, 2H), 4.65 – 4.54 (m, 2H), 4.09 (d,  $J = 10.5$  Hz, 1H), 3.86 (d,  $J = 10.4$  Hz, 1H), 1.95 (s, 3H).  $^{13}\text{C NMR}$  (126 MHz,  $\text{CDCl}_3$ )  $\delta$  165.72, 133.54, 129.91, 128.69, 69.65, 61.57, 39.37, 27.21. **HRMS** Calcd for  $\text{C}_{11}\text{H}_{13}^{81}\text{Br}^{79}\text{BrO}_2$  [ $\text{M}+\text{H}^+$ ]: 336.9257; Found: 336.9271.

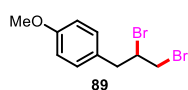

Compound **89** was isolated in 17% yield following the general conditions C.  $^1\text{H NMR}$  (500 MHz,  $\text{CDCl}_3$ )  $\delta$  7.21 (d,  $J = 8.2$  Hz, 2H), 6.88 (d,  $J = 8.2$  Hz, 2H), 4.39 – 4.28 (m, 1H), 3.84 – 3.78 (m, 4H), 3.61 (t,  $J = 9.7$  Hz, 1H), 3.42 (dd,  $J = 14.7, 4.9$  Hz, 1H), 3.11 (dd,  $J = 14.7, 7.5$  Hz, 1H).<sup>23</sup>

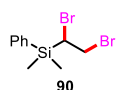

Compound **90** was isolated in 67% yield following the general conditions C.  $^1\text{H NMR}$  (500 MHz,  $\text{CDCl}_3$ )  $\delta$  7.57 (d,  $J = 7.4$  Hz, 2H), 7.47 – 7.38 (m, 3H), 3.93 – 3.84 (m, 1H), 3.66 – 3.58 (m, 2H), 0.53 (d,  $J = 3.6$  Hz, 6H).  $^{13}\text{C NMR}$  (126 MHz,  $\text{CDCl}_3$ )  $\delta$  134.50, 134.17, 130.26, 128.30, 42.57, 36.98, -3.23, -4.65. **HRMS** Calcd for  $\text{C}_{10}\text{H}_{15}\text{Br}_2\text{Si}$  [ $\text{M}+\text{H}^+$ ]: 320.9304; Found: 320.9313.

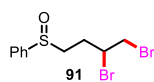

Compound **91** was isolated in 62% yield following the general conditions C.  $^1\text{H NMR}$  (500 MHz,  $\text{CDCl}_3$ )  $\delta$  7.38 (d,  $J = 7.7$  Hz, 2H), 7.31 (t,  $J = 7.6$  Hz, 2H), 7.22 (t,  $J = 7.3$  Hz, 1H), 4.42 – 4.34 (m, 1H), 3.86 (dd,  $J = 10.4, 4.3$  Hz, 1H), 3.62 (t,  $J = 10.1$  Hz, 1H), 3.26 – 3.18 (m, 1H), 3.06 – 2.97 (m, 1H), 2.49 – 2.40 (m, 1H), 2.12 – 2.03 (m, 1H).  $^{13}\text{C NMR}$  (126 MHz,  $\text{CDCl}_3$ )  $\delta$  135.34, 130.05, 129.18, 126.64, 51.04, 35.98, 35.72, 31.58. **HRMS** Calcd for  $\text{C}_{10}\text{H}_{13}^{81}\text{Br}^{79}\text{BrOS}$  [ $\text{M}+\text{H}^+$ ]: 340.9028; Found: 340.9028.

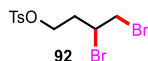

Compound **92** was isolated in 50% yield following the general conditions C.  $^1\text{H NMR}$  (500 MHz,  $\text{CDCl}_3$ )  $\delta$  7.80 (d,  $J = 8.2$  Hz, 2H), 7.36 (d,  $J = 8.0$  Hz, 2H), 4.29 – 4.24 (m, 1H), 4.23 – 4.17 (m, 2H), 3.82 (dd,  $J = 10.5, 4.3$  Hz, 1H), 3.58 (t, 1H), 2.61 – 2.53 (m, 1H), 2.45 (s, 3H), 2.01 – 1.93 (m, 1H).  $^{13}\text{C NMR}$  (126 MHz,  $\text{CDCl}_3$ )  $\delta$  145.22, 132.75, 130.10, 128.11, 67.70, 47.65, 36.05, 35.80, 21.80. **HRMS** Calcd for  $\text{C}_{11}\text{H}_{14}\text{Br}_2\text{NaO}_3\text{S}$  [ $\text{M}+\text{Na}^+$ ]: 406.8923; Found: 406.8924.

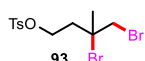

Compound **93** was isolated in 43% yield following the general conditions C.  $^1\text{H NMR}$  (500 MHz,  $\text{CDCl}_3$ )  $\delta$  7.82 (d,  $J = 7.9$  Hz, 2H), 7.36 (d,  $J = 8.0$  Hz, 2H), 4.29 (t,  $J = 6.8$  Hz, 2H), 3.77 (s, 2H), 2.46 (s, 3H), 2.30 (t,  $J = 6.7$  Hz, 2H), 1.83 (s, 3H).  $^{13}\text{C NMR}$  (126 MHz,  $\text{CDCl}_3$ )  $\delta$  145.18, 132.97, 130.09, 128.11, 67.91, 63.51, 42.57, 40.78, 30.80, 21.81. **HRMS** Calcd for  $\text{C}_{12}\text{H}_{16}^{81}\text{Br}^{79}\text{BrNaO}_3\text{S}$  [ $\text{M}+\text{Na}^+$ ]: 422.9059; Found: 422.9057.

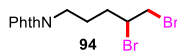

Compound **94** was isolated in 66% yield following the general conditions C.  $^1\text{H NMR}$  (500 MHz,  $\text{CDCl}_3$ )  $\delta$  7.90 – 7.81 (m, 2H), 7.79 – 7.69 (m, 2H), 4.28 – 4.16 (m, 1H), 3.85 – 3.79 (m, 1H), 3.73 (t, 2H), 3.59 (t,  $J = 10.0$  Hz, 1H), 2.28 – 2.17 (m, 1H), 2.06 – 1.97 (m, 1H), 1.90 – 1.78 (m, 2H).<sup>24</sup>

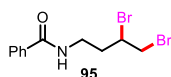

Compound **95** was isolated in 60% yield following the general conditions C.  $^1\text{H NMR}$  (500 MHz,  $\text{CDCl}_3$ )  $\delta$  7.77 (d,  $J = 7.6$  Hz, 2H), 7.50 (t,  $J = 7.4$  Hz, 1H), 7.43 (t,  $J = 7.5$  Hz, 2H), 6.50 (br, 1H), 4.28 – 4.19 (m, 1H), 3.88 (dd,  $J = 10.5, 4.5$  Hz, 1H), 3.78 – 3.70 (m, 1H), 3.67 (t,  $J = 9.9$  Hz, 1H), 3.64 – 3.56 (m, 1H), 2.65 – 2.56 (m, 1H), 2.10 – 2.00 (m, 1H).  $^{13}\text{C NMR}$  (126 MHz,  $\text{CDCl}_3$ )  $\delta$  167.87, 134.38, 131.76, 128.76, 127.03, 50.17, 38.35, 36.38, 36.19. **HRMS** Calcd for  $\text{C}_{11}\text{H}_{14}\text{Br}_2\text{NO}$  [ $\text{M}+\text{H}^+$ ]: 333.9437; Found: 333.9442.

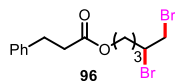

Compound **96** was isolated in 55% yield following the general conditions C.  $^1\text{H NMR}$  (500 MHz,  $\text{CDCl}_3$ )  $\delta$  7.29 (t,  $J = 7.5$  Hz, 2H), 7.23 – 7.19 (m, 3H), 4.17 – 4.09 (m, 3H), 3.84 (dd,  $J = 10.3, 4.4$  Hz, 1H), 3.60 (t,  $J = 10.1$  Hz, 1H), 2.96 (t,  $J = 7.8$  Hz, 2H), 2.65 (t,  $J = 7.8$  Hz, 2H), 2.25 – 2.16 (m, 1H), 1.95 – 1.87 (m, 1H), 1.83 – 1.70 (m, 2H).  $^{13}\text{C NMR}$  (126 MHz,  $\text{CDCl}_3$ )  $\delta$  172.96, 140.55, 128.64, 128.40, 126.42, 63.49, 52.13, 36.09, 35.96, 32.79, 31.09, 26.29. **HRMS** Calcd for  $\text{C}_{14}\text{H}_{18}\text{Br}_2\text{NaO}_2$  [ $\text{M}+\text{Na}^+$ ]: 398.9566; Found: 398.9566.

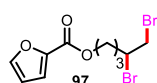

Compound **97** was isolated in 69% yield following the general conditions C.  $^1\text{H NMR}$  (500 MHz,  $\text{CDCl}_3$ )  $\delta$  7.58 (d,  $J = 1.6$  Hz, 1H), 7.18 (d,  $J = 3.5$  Hz, 1H), 6.53 – 6.50 (m, 1H), 4.35 (t,  $J = 6.0$  Hz, 2H), 4.25 – 4.18 (m, 1H), 3.87 (dd,  $J = 10.3, 4.3$  Hz, 1H), 3.63 (t,  $J = 10.1$  Hz, 1H), 2.37 – 2.30 (m, 1H), 2.10 – 2.03 (m, 1H), 1.94 – 1.87 (m, 2H).  $^{13}\text{C NMR}$  (126 MHz,  $\text{CDCl}_3$ )  $\delta$  158.74, 146.52, 144.66, 118.14, 111.97, 63.94, 52.03, 36.06, 32.81, 26.37. **HRMS** Calcd for  $\text{C}_{10}\text{H}_{12}\text{Br}_2\text{NaO}_3$  [ $\text{M}+\text{Na}^+$ ]: 360.9045; Found: 360.9050.

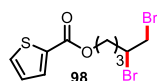

Compound **98** was isolated in 67% yield following the general conditions C.  $^1\text{H NMR}$  (500 MHz,  $\text{CDCl}_3$ )  $\delta$  7.81 (dd,  $J = 3.8, 1.3$  Hz, 1H), 7.56 (dd,  $J = 4.9, 1.3$  Hz, 1H), 7.10 (dd,  $J = 5.0, 3.7$  Hz, 1H), 4.37 – 4.33 (m, 2H), 4.26 – 4.20 (m, 1H), 3.87 (dd,  $J = 10.3, 4.4$  Hz, 1H), 3.64 (t,  $J = 10.1$  Hz, 1H), 2.39 – 2.31 (m, 1H), 2.09 – 2.03 (m, 1H), 1.97 – 1.88 (m, 2H).  $^{13}\text{C NMR}$  (126 MHz,  $\text{CDCl}_3$ )  $\delta$  162.26, 133.76, 133.62, 132.60, 127.91, 64.14, 52.05, 36.05, 32.85, 26.35. **HRMS** Calcd for  $\text{C}_{10}\text{H}_{12}\text{Br}_2\text{NaO}_2\text{S}$  [ $\text{M}+\text{Na}^+$ ]: 376.8817; Found: 376.8816.

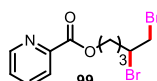

Compound **99** was isolated in 80% yield following the general conditions C.  $^1\text{H NMR}$  (500 MHz,  $\text{CDCl}_3$ )  $\delta$  8.74 (d,  $J = 4.7$  Hz, 1H), 8.10 (d,  $J = 7.9$  Hz, 1H), 7.83 (t,  $J = 7.7$  Hz, 1H), 7.46 (dd,  $J = 7.6, 4.7$  Hz, 1H), 4.45 (t,  $J = 6.3$  Hz, 2H), 4.25 – 4.17 (m, 1H),

3.84 (dd,  $J = 10.3, 4.3$  Hz, 1H), 3.61 (t,  $J = 10.0$  Hz, 1H), 2.38 – 2.27 (m, 1H), 2.17 – 2.04 (m, 1H), 1.98 – 1.87 (m, 2H).  $^{13}\text{C}$  NMR (126 MHz,  $\text{CDCl}_3$ )  $\delta$  165.15, 150.00, 148.00, 137.11, 127.03, 125.24, 64.87, 52.02, 36.08, 32.74, 26.34. HRMS Calcd for  $\text{C}_{11}\text{H}_{14}\text{Br}_2\text{NO}_2$  [ $\text{M}+\text{H}^+$ ]: 349.9386; Found: 349.9394.

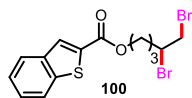

Compound **100** was isolated in 76% yield following the general conditions C.  $^1\text{H}$  NMR (500 MHz,  $\text{CDCl}_3$ )  $\delta$  8.59 (d,  $J = 8.1$  Hz, 1H), 8.40 (s, 1H), 7.88 (d,  $J = 8.1$  Hz, 1H), 7.49 (t,  $J = 7.6$  Hz, 1H), 7.41 (t,  $J = 7.5$  Hz, 1H), 4.43 (t,  $J = 5.8$  Hz, 2H), 4.29 – 4.23 (m, 1H), 3.90 (dd,  $J = 10.3, 4.3$  Hz, 1H), 3.66 (t,  $J = 10.2$  Hz, 1H), 2.46 – 2.36 (m, 1H), 2.16 – 2.09 (m, 1H), 2.03 – 1.92 (m, 2H).  $^{13}\text{C}$  NMR (126 MHz,  $\text{CDCl}_3$ )  $\delta$  162.80, 140.17, 136.87, 136.78, 127.19, 125.60, 125.17, 124.84, 122.65, 63.69, 52.03, 36.00, 32.97, 26.38. HRMS Calcd for  $\text{C}_{14}\text{H}_{14}\text{Br}_2\text{NaO}_2\text{S}$  [ $\text{M}+\text{Na}^+$ ]: 426.8973; Found: 426.8975.

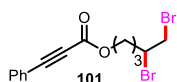

Compound **101** was isolated in 50% yield following the general conditions C.  $^1\text{H}$  NMR (500 MHz,  $\text{CDCl}_3$ )  $\delta$  7.60 (d,  $J = 6.8$  Hz, 2H), 7.46 (t,  $J = 7.5$  Hz, 1H), 7.38 (t,  $J = 7.6$  Hz, 2H), 4.29 (t,  $J = 5.9$  Hz, 2H), 4.24 – 4.17 (m, 1H), 3.88 (dd,  $J = 10.4, 4.4$  Hz, 1H), 3.64 (t,  $J = 10.1$  Hz, 1H), 2.36 – 2.28 (m, 1H), 2.10 – 1.99 (m, 1H), 1.96 – 1.82 (m, 2H).  $^{13}\text{C}$  NMR (126 MHz,  $\text{CDCl}_3$ )  $\delta$  154.16, 133.17, 130.85, 128.73, 119.69, 86.76, 80.61, 65.12, 52.02, 36.06, 32.82, 26.29. HRMS Calcd for  $\text{C}_{14}\text{H}_{14}\text{Br}_2\text{NaO}_2$  [ $\text{M}+\text{Na}^+$ ]: 394.9253; Found: 394.9249.

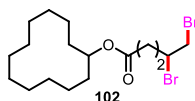

Compound **102** was isolated in 39% yield following the general conditions C (the recovery of starting material is 42%).  $^1\text{H}$  NMR (500 MHz,  $\text{CDCl}_3$ )  $\delta$  5.07 – 4.99 (m, 1H), 4.28 – 4.21 (m, 1H), 3.87 (dd,  $J = 10.5, 4.3$  Hz, 1H), 3.62 (t,  $J = 10.0$  Hz, 1H), 2.61 – 2.44 (m, 3H), 2.07 – 1.95 (m, 1H), 1.75 – 1.67 (m, 2H), 1.53 – 1.46 (m, 2H), 1.41 – 1.29 (m, 18H).  $^{13}\text{C}$  NMR (126 MHz,  $\text{CDCl}_3$ )  $\delta$  172.13, 72.88, 51.84, 36.11, 32.26, 31.72, 29.25, 24.23, 24.00, 23.52, 23.51, 23.35, 21.08. HRMS Calcd for

C<sub>17</sub>H<sub>30</sub>Br<sub>2</sub>NaO<sub>2</sub> [M+Na<sup>+</sup>]: 447.0505; Found: 447.0501.

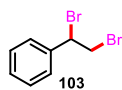

Compound **103** was isolated in 49% yield following the general conditions C. <sup>1</sup>H NMR (500 MHz, CDCl<sub>3</sub>) δ 7.44 – 7.33 (m, 5H), 5.15 (dd, *J* = 10.7, 5.4 Hz, 1H), 4.12 – 4.01 (m, 2H).<sup>25</sup>

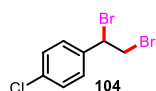

Compound **104** was isolated in 57% yield following the general conditions C. <sup>1</sup>H NMR (500 MHz, CDCl<sub>3</sub>) δ 7.40 – 7.32 (m, 4H), 5.11 (dd, *J* = 11.1, 5.0 Hz, 1H), 4.07 (dd, *J* = 10.3, 5.1 Hz, 1H), 3.97 (t, *J* = 10.7 Hz, 1H).<sup>25</sup>

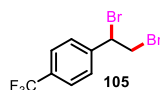

Compound **105** was isolated in 57% yield following the general conditions C. <sup>1</sup>H NMR (500 MHz, CDCl<sub>3</sub>) δ 7.66 (d, *J* = 8.1 Hz, 2H), 7.53 (d, *J* = 8.0 Hz, 2H), 5.15 (dd, *J* = 11.1, 5.0 Hz, 1H), 4.09 (dd, *J* = 10.4, 5.0 Hz, 1H), 4.00 (t, *J* = 10.8 Hz, 1H).<sup>26</sup>

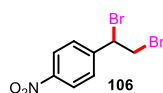

Compound **106** was isolated in 67% yield following the general conditions C. <sup>1</sup>H NMR (500 MHz, CDCl<sub>3</sub>) δ 8.24 (d, *J* = 8.8 Hz, 2H), 7.58 (d, *J* = 8.8 Hz, 2H), 5.17 (dd, *J* = 11.3, 4.9 Hz, 1H), 4.09 (dd, *J* = 10.5, 4.9 Hz, 1H), 3.98 (t, *J* = 10.9 Hz, 1H).<sup>27</sup>

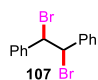

Compound **107** was isolated in 27% yield following the general conditions C. <sup>1</sup>H NMR (500 MHz, CDCl<sub>3</sub>) δ 7.18 (m, 10H), 5.48 (s, 2H).<sup>28</sup>

## 6.2 Visible-light-induced vicinal dibromination of natural products and drug derivatives

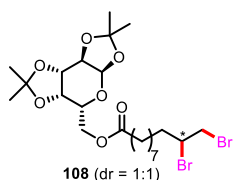

Alkene (**50s**) (0.2 mmol, 1.0 equiv), NaNO<sub>2</sub> (0.2 mmol, 1.0 equiv) and HBr (100  $\mu$ L, aq. 40% in water) were dispersed in CH<sub>2</sub>Cl<sub>2</sub> (2.0 mL) in a 4 mL glass vial at room temperature. The reaction vial was sealed with a PTEF cap and the reaction mixture vigorously stirred at 30 °C under the 24 W blue LEDs irradiation for 0.5 h (It is worth noting that 24 W blue LEDs was positioned 5 cm aside from the reaction vials.). Then, the reaction mixture was extracted with CH<sub>2</sub>Cl<sub>2</sub> (3  $\times$  2 mL). The combined organic layer was dried over anhydrous Na<sub>2</sub>SO<sub>4</sub>, filtered and concentrated. The residue was purified by chromatography on silica gel to afford the desired dibromination products. Compound **108** was isolated in 67% yield. **<sup>1</sup>H NMR** (500 MHz, CDCl<sub>3</sub>)  $\delta$  5.51 (d, J = 5.0 Hz, 1H), 4.59 (d, J = 5.4 Hz, 1H), 4.29 (dd, J = 11.5, 3.8 Hz, 2H), 4.21 (d, J = 6.1 Hz, 1H), 4.18 – 4.11 (m, 2H), 4.02 – 3.97 (m, 1H), 3.82 (dd, J = 10.2, 4.4 Hz, 1H), 3.60 (t, J = 10.0 Hz, 1H), 2.31 (t, J = 7.5 Hz, 2H), 2.15 – 2.06 (m, 1H), 1.81 – 1.71 (m, 1H), 1.62 – 1.57 (m, 2H), 1.56 – 1.51 (m, 1H), 1.48 (s, 3H), 1.43 (s, 3H), 1.41 – 1.36 (m, 1H), 1.31 (d, J = 3.8 Hz, 6H), 1.30 – 1.19 (m, 8H). **<sup>13</sup>C NMR** (126 MHz, CDCl<sub>3</sub>)  $\delta$  173.81, 109.71, 108.83, 96.40, 71.18, 70.79, 70.54, 66.12, 63.33, 53.20, 36.45, 36.09, 34.27, 29.25, 29.24, 29.11, 28.83, 26.81, 26.13, 26.06, 25.09, 25.03, 24.59. **HRMS** Calcd for C<sub>23</sub>H<sub>39</sub>Br<sub>2</sub>O<sub>7</sub> [M+H<sup>+</sup>]: 585.1057; Found: 585.1059.

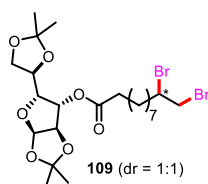

Alkene (**51s**) (0.2 mmol, 1.0 equiv), NaNO<sub>2</sub> (0.2 mmol, 1.0 equiv) and HBr (100  $\mu$ L, aq. 40% in water) were dispersed in CH<sub>2</sub>Cl<sub>2</sub> (2.0 mL) in a 4 mL glass vial at room temperature. The reaction vial was sealed with a PTEF cap and the reaction mixture vigorously stirred at 30 °C under the 24 W blue LEDs irradiation for 0.5 h (It is worth noting that 24 W blue LEDs was positioned 5 cm aside from the reaction vials.). Then, the reaction mixture was extracted with CH<sub>2</sub>Cl<sub>2</sub> (3  $\times$  2 mL). The combined organic layer was dried over anhydrous Na<sub>2</sub>SO<sub>4</sub>, filtered and concentrated. The residue was purified by chromatography on silica gel to afford the desired dibromination products.



Compound **109** was isolated in 70% yield. **<sup>1</sup>H NMR** (500 MHz, CDCl<sub>3</sub>) δ 5.86 (d, *J* = 3.7 Hz, 1H), 5.25 (s, 1H), 4.46 (d, *J* = 3.7 Hz, 1H), 4.23 – 4.18 (m, 2H), 4.18 – 4.11 (m, 1H), 4.10 – 4.05 (m, 1H), 4.03 – 3.98 (m, 1H), 3.84 (dd, *J* = 10.2, 4.4 Hz, 1H), 3.61 (t, *J* = 10.0 Hz, 1H), 2.33 (td, *J* = 7.4, 3.1 Hz, 2H), 2.16 – 2.07 (m, 1H), 1.81 – 1.72 (m, 1H), 1.65 – 1.58 (m, 2H), 1.58 – 1.53 (m, 1H), 1.51 (s, 3H), 1.43 – 1.37 (m, 4H), 1.35 – 1.25 (m, 14H). **<sup>13</sup>C NMR** (126 MHz, CDCl<sub>3</sub>) δ 172.46, 112.41, 109.44, 105.19, 83.53, 80.00, 75.97, 72.57, 67.42, 53.18, 36.44, 36.09, 34.36, 29.28, 29.23, 29.10, 28.85, 26.96, 26.87, 26.82, 26.35, 25.42, 24.96. **HRMS** Calcd for C<sub>23</sub>H<sub>38</sub>Br<sub>2</sub>NaO<sub>7</sub> [M+Na<sup>+</sup>]: 607.0876; Found: 607.0886.

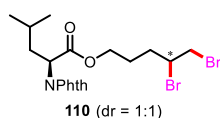

Compound **110** was isolated in 60% yield following the general conditions C. **<sup>1</sup>H NMR** (500 MHz, CDCl<sub>3</sub>) δ 7.86 (dd, *J* = 5.4, 3.1 Hz, 2H), 7.73 (dd, *J* = 5.5, 3.1 Hz, 2H), 4.94 (dd, *J* = 11.5, 4.4 Hz, 1H), 4.24 – 4.12 (m, 2H), 4.12 – 4.03 (m, 1H), 3.79 – 3.74 (m, 1H), 3.51 (t, *J* = 9.1 Hz, 1H), 2.36 – 2.28 (m, 1H), 2.19 – 2.10 (m, 1H), 2.00 – 1.93 (m, 1H), 1.91 – 1.83 (m, 1H), 1.79 – 1.67 (m, 2H), 1.55 – 1.43 (m, 1H), 0.94 (d, *J* = 6.6 Hz, 3H), 0.92 (d, *J* = 6.7 Hz, 3H). **<sup>13</sup>C NMR** (126 MHz, CDCl<sub>3</sub>) δ 169.82, 167.82, 134.31, 131.89, 123.67, 64.72, 51.88, 51.84, 50.75, 37.40, 35.94, 35.91, 32.59, 25.98, 25.16, 23.28, 21.15. **HRMS** Calcd for C<sub>19</sub>H<sub>24</sub>Br<sub>2</sub>NO<sub>4</sub> [M+H<sup>+</sup>]: 488.0067; Found: 488.0071.

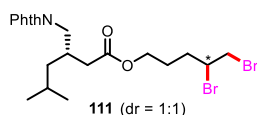

Compound **111** was isolated in 63% yield following the general conditions C. **<sup>1</sup>H NMR** (500 MHz, CDCl<sub>3</sub>) δ 7.83 (dd, *J* = 5.5, 3.1 Hz, 2H), 7.71 (dd, *J* = 5.5, 3.1 Hz, 2H), 4.19 – 4.07 (m, 1H), 4.04 – 3.89 (m, 2H), 3.84 (dd, *J* = 10.3, 4.4 Hz, 1H), 3.69 (dd, *J* = 13.9, 5.6 Hz, 1H), 3.64 – 3.57 (m, 2H), 2.50 – 2.41 (m, 1H), 2.35 – 2.26 (m, 2H), 2.25 – 2.16 (m, 1H), 1.91 – 1.65 (m, 4H), 1.24 – 1.18 (m, 2H), 0.94 (d, *J* = 6.5 Hz, 3H), 0.88 (d, *J* = 6.5 Hz, 3H). **<sup>13</sup>C NMR** (126 MHz, CDCl<sub>3</sub>) δ 172.54, 168.68, 134.08, 132.09, 123.36, 63.42, 63.39, 58.52, 52.22, 52.22, 42.01, 41.86, 37.70, 36.18, 32.81, 32.80, 26.22, 25.39, 22.81, 22.69. **HRMS** Calcd for C<sub>21</sub>H<sub>28</sub>Br<sub>2</sub>NO<sub>4</sub> [M+H<sup>+</sup>]: 516.0380; Found: 516.0382.

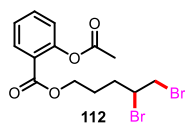

Compound **112** was isolated in 61% yield following the general conditions C.  $^1\text{H NMR}$  (500 MHz,  $\text{CDCl}_3$ )  $\delta$  8.02 (d,  $J = 7.9$  Hz, 1H), 7.56 (t,  $J = 6.9$  Hz, 1H), 7.32 (t,  $J = 7.5$  Hz, 1H), 7.11 (d,  $J = 8.0$  Hz, 1H), 4.32 (t,  $J = 5.3$  Hz, 2H), 4.26 – 4.17 (m, 1H), 3.87 (dd,  $J = 10.4, 4.4$  Hz, 1H), 3.64 (t,  $J = 10.1$  Hz, 1H), 2.36 (s, 3H), 2.35 – 2.27 (m, 1H), 2.12 – 2.01 (m, 1H), 1.97 – 1.83 (m, 2H).  $^{13}\text{C NMR}$  (126 MHz,  $\text{CDCl}_3$ )  $\delta$  169.80, 164.45, 150.90, 134.09, 131.79, 126.19, 123.98, 123.30, 64.15, 52.11, 36.11, 32.85, 26.39, 21.24. **HRMS** Calcd for  $\text{C}_{14}\text{H}_{16}\text{Br}_2\text{NaO}_4$  [ $\text{M}+\text{Na}^+$ ]: 428.9308; Found: 428.9308.

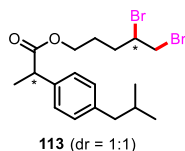

Compound **113** was isolated in 43% yield following the general conditions C.  $^1\text{H NMR}$  (500 MHz,  $\text{CDCl}_3$ )  $\delta$  7.20 (d,  $J = 7.7$  Hz, 2H), 7.10 (d,  $J = 7.8$  Hz, 2H), 4.17 – 4.05 (m, 3H), 3.78 (dd,  $J = 10.3, 4.4$  Hz, 1H), 3.74 – 3.66 (m, 1H), 3.53 (t,  $J = 10.0$  Hz, 1H), 2.45 (d,  $J = 7.2$  Hz, 2H), 2.16 – 2.08 (m, 1H), 1.93 – 1.79 (m, 2H), 1.77 – 1.66 (m, 2H), 1.50 (d,  $J = 7.1$  Hz, 3H), 0.90 (d,  $J = 6.6$  Hz, 6H).  $^{13}\text{C NMR}$  (126 MHz,  $\text{CDCl}_3$ )  $\delta$  174.80, 174.79, 140.71, 140.71, 137.80, 129.50, 129.50, 127.30, 63.69, 63.61, 52.16, 52.14, 45.30, 45.17, 36.11, 32.80, 32.72, 30.32, 26.23, 26.22, 22.54, 18.47. **HRMS** Calcd for  $\text{C}_{18}\text{H}_{26}\text{Br}_2\text{NaO}_2$  [ $\text{M}+\text{Na}^+$ ]: 455.0192; Found: 455.0194.

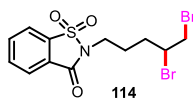

Compound **114** was isolated in 63% yield following the general conditions C.  $^1\text{H NMR}$  (500 MHz,  $\text{CDCl}_3$ )  $\delta$  8.06 (d,  $J = 7.4$  Hz, 1H), 7.93 (d,  $J = 7.5$  Hz, 1H), 7.87 (t,  $J = 7.3$  Hz, 1H), 7.84 (t,  $J = 7.4$  Hz, 1H), 4.24 – 4.18 (m, 1H), 3.89 – 3.80 (m, 3H), 3.62 (t,  $J = 10.0$  Hz, 1H), 2.34 – 2.26 (m, 1H), 2.22 – 2.13 (m, 1H), 2.04 – 1.87 (m, 2H).  $^{13}\text{C NMR}$  (126 MHz,  $\text{CDCl}_3$ )  $\delta$  159.13, 137.74, 134.95, 134.52, 127.39, 125.35, 121.11, 51.68, 38.51, 36.12, 33.36, 26.13. **HRMS** Calcd for  $\text{C}_{12}\text{H}_{13}\text{Br}_2\text{NNaO}_3\text{S}$  [ $\text{M}+\text{Na}^+$ ]: 431.8875; Found: 431.8875.

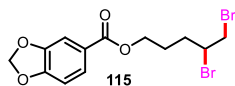

Compound **115** was isolated in 63% yield following the general conditions C.  $^1\text{H NMR}$  (500 MHz,  $\text{CDCl}_3$ )  $\delta$  7.64 (d,  $J = 8.2$  Hz, 1H), 7.46 (s, 1H), 6.83 (d,  $J = 8.1$  Hz, 1H), 6.03 (s, 2H), 4.33 (t,  $J = 6.1$  Hz, 2H), 4.25 – 4.19 (m, 1H), 3.87 (dd,  $J = 10.3, 4.3$  Hz, 1H), 3.64 (t,  $J = 10.2$  Hz, 1H), 2.39 – 2.28 (m, 1H), 2.11 – 1.99 (m, 1H), 1.96 – 1.85 (m, 2H).  $^{13}\text{C NMR}$  (126 MHz,  $\text{CDCl}_3$ )  $\delta$  165.98, 151.79, 147.87, 125.49, 124.27, 109.62, 108.13, 101.95, 63.92, 52.10, 36.06, 32.90, 26.38. **HRMS** Calcd for  $\text{C}_{13}\text{H}_{14}\text{Br}_2\text{NaO}_4$  [ $\text{M}+\text{Na}^+$ ]: 414.9151; Found: 414.9153.

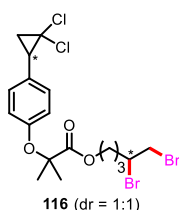

Compound **116** was isolated in 68% yield following the general conditions C.  $^1\text{H NMR}$  (500 MHz,  $\text{CDCl}_3$ )  $\delta$  7.10 (d,  $J = 8.1$  Hz, 2H), 6.79 (d,  $J = 8.2$  Hz, 2H), 4.18 (t,  $J = 6.0$  Hz, 2H), 4.13 – 4.03 (m, 1H), 3.76 (dd,  $J = 10.3, 4.4$  Hz, 1H), 3.50 (t,  $J = 10.0$  Hz, 1H), 2.85 – 2.79 (m, 1H), 2.11 – 2.03 (m, 1H), 1.96 – 1.84 (m, 2H), 1.79 – 1.66 (m, 3H), 1.60 (s, 6H).  $^{13}\text{C NMR}$  (126 MHz,  $\text{CDCl}_3$ )  $\delta$  174.18, 155.01, 129.75, 128.10, 118.38, 79.14, 64.40, 60.96, 51.99, 36.04, 34.85, 32.61, 26.11, 25.90, 25.52. **HRMS** Calcd for  $\text{C}_{18}\text{H}_{22}^{81}\text{Br}^{79}\text{BrCl}_2\text{NaO}_3$  [ $\text{M}+\text{Na}^+$ ]: 538.9185; Found: 538.9185.

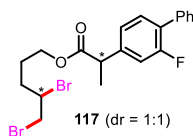

Compound **117** was isolated in 74% yield following the general conditions C.  $^1\text{H NMR}$  (500 MHz,  $\text{CDCl}_3$ )  $\delta$  7.55 (d,  $J = 7.6$  Hz, 2H), 7.45 (t,  $J = 7.6$  Hz, 2H), 7.43 – 7.34 (m, 2H), 7.16 (dd,  $J = 14.4, 9.8$  Hz, 2H), 4.23 – 4.14 (m, 2H), 4.14 – 4.07 (m, 1H), 3.81 (dd,  $J = 10.2, 4.3$  Hz, 1H), 3.77 (t,  $J = 7.2$  Hz, 1H), 3.55 (t,  $J = 10.2$  Hz, 1H), 2.18 (t,  $J = 9.9$  Hz, 1H), 1.98 – 1.87 (m, 1H), 1.82 – 1.72 (m, 2H), 1.56 (d,  $J = 7.2$  Hz, 3H).  $^{13}\text{C NMR}$  (126 MHz,  $\text{CDCl}_3$ )  $\delta$  173.99, 160.80, 158.82, 141.86, 141.80, 135.57, 130.99, 130.96, 129.08, 129.06, 128.58, 127.80, 123.70, 123.68, 115.48, 115.29, 64.03, 63.95, 51.98, 51.95, 45.17, 35.98, 35.96, 32.78, 32.69, 26.18, 18.34.  $^{19}\text{F NMR}$  (471 MHz,  $\text{CDCl}_3$ )  $\delta$  -117.48(q,  $J = 9.4$  Hz). **HRMS** Calcd for  $\text{C}_{20}\text{H}_{21}^{81}\text{Br}^{79}\text{BrFNaO}_2$  [ $\text{M}+\text{Na}^+$ ]: 494.9765;

Found: 494.9766.

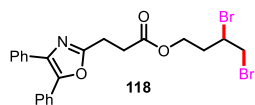

Compound **118** was isolated in 68% yield following the general conditions C.  $^1\text{H NMR}$  (500 MHz,  $\text{CDCl}_3$ )  $\delta$  7.64 (d,  $J = 7.5$  Hz, 2H), 7.58 (d,  $J = 7.5$  Hz, 2H), 7.39 – 7.29 (m, 6H), 4.43 – 4.36 (m, 1H), 4.35 – 4.27 (m, 1H), 4.27 – 4.21 (m, 1H), 3.77 (dd,  $J = 10.5$ , 4.3 Hz, 1H), 3.57 (t,  $J = 10.0$  Hz, 1H), 3.20 (t,  $J = 7.4$  Hz, 2H), 2.94 (t,  $J = 7.4$  Hz, 2H), 2.58 – 2.49 (m, 1H), 2.08 – 2.00 (m, 1H).  $^{13}\text{C NMR}$  (126 MHz,  $\text{CDCl}_3$ )  $\delta$  171.77, 161.65, 145.51, 135.17, 132.46, 128.98, 128.71, 128.61, 128.54, 128.13, 127.94, 126.54, 62.21, 48.55, 36.27, 35.25, 31.05, 23.52. **HRMS** Calcd for  $\text{C}_{22}\text{H}_{22}^{81}\text{Br}^{79}\text{BrNO}_3$  [ $\text{M}+\text{H}^+$ ]: 507.9941; Found: 507.9949.

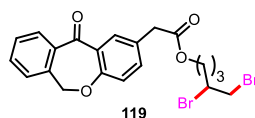

Compound **119** was isolated in 67% yield following the general conditions C.  $^1\text{H NMR}$  (500 MHz,  $\text{CDCl}_3$ )  $\delta$  8.11 (s, 1H), 7.87 (d,  $J = 7.7$  Hz, 1H), 7.54 (t,  $J = 7.4$  Hz, 1H), 7.46 (d,  $J = 7.6$  Hz, 1H), 7.44 – 7.40 (m, 1H), 7.34 (d,  $J = 7.4$  Hz, 1H), 7.02 (d,  $J = 8.3$  Hz, 1H), 5.16 (s, 2H), 4.21 – 4.08 (m, 3H), 3.81 (dd,  $J = 10.3$ , 4.3 Hz, 1H), 3.64 (s, 2H), 3.57 (t,  $J = 10.0$  Hz, 1H), 2.26 – 2.13 (m, 1H), 1.96 – 1.87 (m, 1H), 1.85 – 1.71 (m, 2H).  $^{13}\text{C NMR}$  (126 MHz,  $\text{CDCl}_3$ )  $\delta$  190.83, 171.34, 160.53, 140.47, 136.38, 135.59, 132.84, 132.50, 129.55, 129.31, 127.88, 127.80, 125.22, 121.17, 73.67, 63.96, 52.08, 40.35, 36.09, 32.74, 26.16. **HRMS** Calcd for  $\text{C}_{21}\text{H}_{21}\text{Br}_2\text{O}_4$  [ $\text{M}+\text{H}^+$ ]: 494.9801; Found: 494.9806.

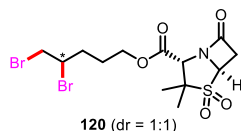

Alkene (**66s**) (0.2 mmol, 1.0 equiv),  $\text{NaNO}_2$  (0.2 mmol, 1.0 equiv) and  $\text{HBr}$  (100  $\mu\text{L}$ , aq. 40% in water) were dispersed in  $\text{PhCl}$  (2.0 mL) in a 4 mL glass vial at room temperature. The reaction vial was sealed with a PTEF cap and the reaction mixture vigorously stirred at 30  $^\circ\text{C}$  under the 24 W blue LEDs irradiation for 0.5 h (It is worth noting that 24 W blue LEDs was positioned 5 cm aside from the reaction vials.). Then,

the reaction mixture was extracted with  $\text{CH}_2\text{Cl}_2$  ( $3 \times 2$  mL). The combined organic layer was dried over anhydrous  $\text{Na}_2\text{SO}_4$ , filtered and concentrated. The residue was purified by chromatography on silica gel to afford the desired dibromination products. Compound **120** was isolated in 26% yield (the recovery of starting material is 60%).  $^1\text{H NMR}$  (500 MHz,  $\text{CDCl}_3$ )  $\delta$  4.64 – 4.61 (m, 1H), 4.40 (s, 1H), 4.28 (t,  $J = 6.0$  Hz, 2H), 4.21 – 4.14 (m, 1H), 3.89 (dd,  $J = 10.3, 4.2$  Hz, 1H), 3.62 (t,  $J = 10.4$  Hz, 1H), 3.48 (dd,  $J = 8.2, 3.2$  Hz, 2H), 2.35 – 2.27 (m, 1H), 2.04 – 1.97 (m, 1H), 1.92 – 1.82 (m, 2H), 1.63 (s, 3H), 1.44 (s, 3H).  $^{13}\text{C NMR}$  (126 MHz,  $\text{CDCl}_3$ )  $\delta$  170.81, 167.08, 65.56, 65.54, 63.43, 62.84, 62.83, 61.26, 51.50, 51.37, 38.51, 35.77, 35.72, 32.72, 32.61, 26.14, 26.06, 20.60, 20.59, 18.84. **HRMS** Calcd for  $\text{C}_{13}\text{H}_{19}^{81}\text{Br}^{79}\text{Br NNaO}_5\text{S}$  [ $\text{M}+\text{Na}^+$ ]: 483.9223; Found: 483.9224.

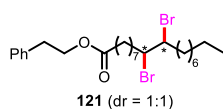

Compound **121** was isolated in 61% yield following the general conditions C.  $^1\text{H NMR}$  (500 MHz,  $\text{CDCl}_3$ )  $\delta$  7.31 (t,  $J = 7.4$  Hz, 2H), 7.27 – 7.20 (m, 3H), 4.29 (t,  $J = 7.1$  Hz, 2H), 4.25 – 4.19 (m, 2H), 2.94 (t,  $J = 7.0$  Hz, 2H), 2.29 (t,  $J = 7.5$  Hz, 2H), 2.12 – 2.00 (m, 2H), 1.90 – 1.78 (m, 2H), 1.64 – 1.53 (m, 4H), 1.42 – 1.26 (m, 18H), 0.89 (t,  $J = 6.7$  Hz, 3H).  $^{13}\text{C NMR}$  (126 MHz,  $\text{CDCl}_3$ )  $\delta$  173.77, 137.96, 128.98, 128.56, 126.62, 64.79, 59.87, 59.80, 35.25, 34.97, 34.94, 34.36, 31.93, 29.47, 29.31, 29.11, 29.06, 28.93, 28.71, 27.92, 27.84, 24.95, 22.76, 14.22. **HRMS** Calcd for  $\text{C}_{26}\text{H}_{42}\text{Br}_2\text{NaO}_2$  [ $\text{M}+\text{Na}^+$ ]: 567.1444; Found: 567.1445.

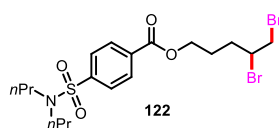

Compound **122** was isolated in 60% yield following the general conditions C.  $^1\text{H NMR}$  (500 MHz,  $\text{CDCl}_3$ )  $\delta$  8.15 (d,  $J = 8.5$  Hz, 2H), 7.87 (d,  $J = 8.5$  Hz, 2H), 4.41 (t,  $J = 6.1$  Hz, 2H), 4.28 – 4.18 (m, 1H), 3.88 (dd,  $J = 10.3, 4.3$  Hz, 1H), 3.64 (t,  $J = 10.2$  Hz, 1H), 3.12 – 3.07 (m, 4H), 2.40 – 2.33 (m, 1H), 2.15 – 2.04 (m, 1H), 1.99 – 1.89 (m, 2H), 1.58 – 1.50 (m, 4H), 0.86 (t,  $J = 7.4$  Hz, 6H).  $^{13}\text{C NMR}$  (126 MHz,  $\text{CDCl}_3$ )  $\delta$  165.26, 144.44, 133.49, 130.32, 127.13, 64.62, 51.83, 50.02, 35.94, 32.77, 26.23, 22.03, 11.26. **HRMS** Calcd for  $\text{C}_{18}\text{H}_{28}\text{Br}_2\text{NO}_4\text{S}$  [ $\text{M}+\text{H}^+$ ]: 512.0100; Found: 512.0108.

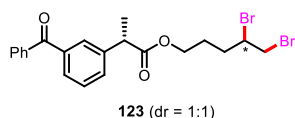

Compound **123** was isolated in 64% yield following the general conditions C.  $^1\text{H NMR}$  (500 MHz,  $\text{CDCl}_3$ )  $\delta$  7.80 (d,  $J = 7.7$  Hz, 2H), 7.76 (s, 1H), 7.67 (d,  $J = 7.7$  Hz, 1H), 7.59 (t,  $J = 7.4$  Hz, 1H), 7.55 (d,  $J = 7.7$  Hz, 1H), 7.48 (t,  $J = 7.6$  Hz, 2H), 7.44 (t,  $J = 7.7$  Hz, 1H), 4.15 – 4.06 (m, 3H), 3.87 – 3.75 (m, 2H), 3.54 (t,  $J = 10.1$  Hz, 1H), 2.24 – 2.06 (m, 1H), 1.97 – 1.82 (m, 1H), 1.80 – 1.65 (m, 2H), 1.54 (d,  $J = 7.2$  Hz, 3H).  $^{13}\text{C NMR}$  (126 MHz,  $\text{CDCl}_3$ )  $\delta$  196.50, 174.03, 140.88, 138.02, 137.57, 132.60, 131.61, 130.16, 129.27, 129.18, 128.68, 128.41, 63.94, 63.89, 52.00, 45.51, 36.04, 32.71, 32.65, 26.16, 18.44. **HRMS** Calcd for  $\text{C}_{21}\text{H}_{23}\text{Br}_2\text{O}_3$  [ $\text{M}+\text{H}^+$ ]: 481.0008; Found: 481.0011.

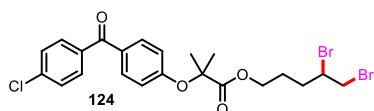

Compound **124** was isolated in 67% yield following the general conditions C.  $^1\text{H NMR}$  (500 MHz,  $\text{CDCl}_3$ )  $\delta$  7.73 (d,  $J = 8.8$  Hz, 2H), 7.69 (d,  $J = 8.5$  Hz, 2H), 7.43 (d,  $J = 8.5$  Hz, 2H), 6.85 (d,  $J = 8.8$  Hz, 2H), 4.20 (t,  $J = 6.1$  Hz, 2H), 4.09 – 4.01 (m, 1H), 3.77 (dd,  $J = 10.4, 4.3$  Hz, 1H), 3.49 (t,  $J = 10.2$  Hz, 1H), 2.16 – 2.02 (m, 1H), 1.96 – 1.85 (m, 1H), 1.79 – 1.70 (m, 1H), 1.68 (s, 6H), 1.67 – 1.58 (m, 1H).  $^{13}\text{C NMR}$  (126 MHz,  $\text{CDCl}_3$ )  $\delta$  194.17, 173.70, 159.71, 138.44, 136.40, 132.17, 131.25, 130.46, 128.63, 117.21, 79.46, 64.72, 51.79, 35.94, 32.61, 26.13, 25.56. **HRMS** Calcd for  $\text{C}_{22}\text{H}_{24}\text{Br}_2\text{ClO}_4$  [ $\text{M}+\text{H}^+$ ]: 544.9724; Found: 544.9734.

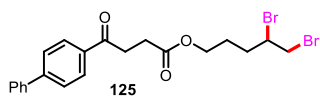

Compound **125** was isolated in 62% yield following the general conditions C.  $^1\text{H NMR}$  (500 MHz,  $\text{CDCl}_3$ )  $\delta$  8.06 (d,  $J = 6.8$  Hz, 2H), 7.69 (d,  $J = 7.9$  Hz, 2H), 7.63 (d,  $J = 7.5$  Hz, 2H), 7.47 (t,  $J = 7.5$  Hz, 2H), 7.40 (t,  $J = 7.3$  Hz, 1H), 4.22 – 4.10 (m, 3H), 3.85 (dd,  $J = 10.6, 4.4$  Hz, 1H), 3.61 (t,  $J = 10.0$  Hz, 1H), 3.35 (t,  $J = 6.5$  Hz, 2H), 2.80 (t,  $J = 6.5$  Hz, 2H), 2.32 – 2.21 (m, 1H), 2.01 – 1.91 (m, 1H), 1.90 – 1.72 (m, 2H).  $^{13}\text{C NMR}$  (126 MHz,  $\text{CDCl}_3$ )  $\delta$  197.72, 172.95, 146.04, 139.93, 135.32, 129.08, 128.76, 128.38, 127.39, 63.70, 52.23, 36.19, 33.51, 32.83, 28.41, 26.29. **HRMS** Calcd for  $\text{C}_{21}\text{H}_{23}\text{Br}_2\text{O}_3$  [ $\text{M}+\text{H}^+$ ]: 481.0008; Found: 481.0013.

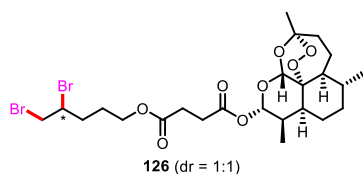

Alkene (**67s**) (0.2 mmol, 1.0 equiv), NaNO<sub>2</sub> (0.2 mmol, 1.0 equiv) and HBr (100  $\mu$ L, aq. 40% in water) were dispersed in PhCl (2.0 mL) in a 4 mL glass vial at room temperature. The reaction vial was sealed with a PTEF cap and the reaction mixture vigorously stirred at 30 °C under the 24 W blue LEDs irradiation for 0.5 h (It is worth noting that 24 W blue LEDs was positioned 5 cm aside from the reaction vials.). Then, the reaction mixture was extracted with CH<sub>2</sub>Cl<sub>2</sub> (3  $\times$  2 mL). The combined organic layer was dried over anhydrous Na<sub>2</sub>SO<sub>4</sub>, filtered and concentrated. The residue was purified by chromatography on silica gel to afford the desired dibromination products. Compound **126** was isolated in 61% yield. <sup>1</sup>H NMR (500 MHz, CDCl<sub>3</sub>)  $\delta$  5.79 (d, *J* = 9.8 Hz, 1H), 5.43 (s, 1H), 4.23 – 4.08 (m, 3H), 3.86 (dd, *J* = 10.4, 4.5 Hz, 1H), 3.63 (t, *J* = 10.0 Hz, 1H), 2.75 – 2.71 (m, 2H), 2.70 – 2.66 (m, 1H), 2.65 – 2.59 (m, 1H), 2.59 – 2.52 (m, 1H), 2.37 (td, *J* = 14.0, 4.0 Hz, 1H), 2.28 – 2.21 (m, 1H), 2.05 – 2.00 (m, 1H), 1.98 – 1.84 (m, 3H), 1.81 – 1.75 (m, 2H), 1.73 – 1.69 (m, 1H), 1.63 – 1.58 (m, 1H), 1.50 – 1.44 (m, 1H), 1.43 (s, 3H), 1.39 – 1.35 (m, 1H), 1.34 – 1.28 (m, 2H), 1.05 – 0.98 (m, 1H), 0.96 (d, *J* = 6.1 Hz, 3H), 0.85 (d, *J* = 7.1 Hz, 3H). <sup>13</sup>C NMR (126 MHz, CDCl<sub>3</sub>)  $\delta$  172.19, 172.18, 171.25, 104.60, 92.33, 91.64, 80.25, 63.80, 63.77, 52.23, 51.70, 45.37, 37.40, 36.35, 36.21, 36.20, 34.22, 32.83, 32.79, 31.94, 29.34, 29.02, 26.29, 26.27, 26.09, 24.71, 22.14, 20.34, 12.20. HRMS Calcd for C<sub>24</sub>H<sub>36</sub>Br<sub>2</sub>NaO<sub>8</sub> [M+Na<sup>+</sup>]: 633.0669; Found: 633.0674.

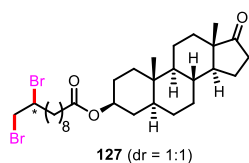

Compound **127** was isolated in 70% yield following the general conditions C. <sup>1</sup>H NMR (500 MHz, CDCl<sub>3</sub>)  $\delta$  4.71 – 4.64 (m, 1H), 4.18 – 4.10 (m, 1H), 3.82 (dd, *J* = 10.2, 4.4 Hz, 1H), 3.60 (t, *J* = 10.0 Hz, 1H), 2.40 (dd, *J* = 19.3, 8.9 Hz, 1H), 2.23 (t, *J* = 7.5 Hz, 2H), 2.13 – 2.05 (m, 1H), 2.05 – 1.97 (m, 1H), 1.94 – 1.87 (m, 1H), 1.82 – 1.69 (m, 5H), 1.68 – 1.54 (m, 5H), 1.53 – 1.45 (m, 3H), 1.35 – 1.20 (m, 16H), 1.05 – 0.94 (m, 2H), 0.83 (s, 6H), 0.73 – 0.66 (m, 1H). <sup>13</sup>C NMR (126 MHz, CDCl<sub>3</sub>)  $\delta$  221.30, 173.51, 73.35, 54.47, 53.22, 51.52, 47.91, 44.82, 36.87, 36.47, 36.15, 35.97, 35.80, 35.19, 34.84,

34.14, 31.68, 30.95, 29.28, 29.23, 29.16, 28.84, 28.43, 27.60, 26.83, 25.16, 21.91, 20.60, 13.95, 12.36. **HRMS** Calcd for C<sub>30</sub>H<sub>48</sub>Br<sub>2</sub>NaO<sub>3</sub> [M+Na<sup>+</sup>]: 637.1862; Found: 637.1869.

## 7. General procedures and substrate scope of nitration reactions

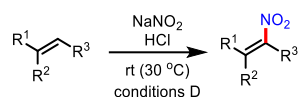

**Scheme S21.** General procedures and substrate scope of nitration reactions

**General conditions D:** Substrate alkenes (0.2 mmol, 1.0 equiv), NaNO<sub>2</sub> (0.5 mmol, 2.5 equiv) and HCl (50  $\mu$ L, aq. 37% in water) were dispersed in CH<sub>2</sub>Cl<sub>2</sub> (2.0 mL) in a 4 mL glass vial at room temperature. The reaction vial was sealed with a PTEF cap and the reaction mixture vigorously stirred at 30 °C for 2 h. Then, the reaction mixture was extracted with CH<sub>2</sub>Cl<sub>2</sub> (3  $\times$  2 mL). The combined organic layer was dried over anhydrous Na<sub>2</sub>SO<sub>4</sub>, filtered and concentrated. The residue was purified by chromatography on silica gel to afford the desired nitration products.

### 7.1 Nitration of alkenes

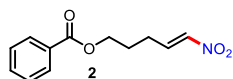

Compound **2** was isolated in 89% yield following the general conditions D (crude <sup>1</sup>H NMR yield: 96%). **<sup>1</sup>H NMR** (500 MHz, CDCl<sub>3</sub>)  $\delta$  8.03 (d,  $J$  = 7.3 Hz, 2H), 7.58 (t,  $J$  = 7.4 Hz, 1H), 7.45 (t,  $J$  = 7.7 Hz, 2H), 7.39 – 7.28 (m, 1H), 7.03 (d,  $J$  = 13.4 Hz, 1H), 4.39 (t,  $J$  = 6.2 Hz, 2H), 2.47 (q,  $J$  = 7.4 Hz, 2H), 2.08 – 1.92 (m, 2H). **<sup>13</sup>C NMR** (126 MHz, CDCl<sub>3</sub>)  $\delta$  166.55, 141.37, 140.19, 133.32, 129.99, 129.68, 128.60, 63.76, 27.22, 25.52. **HRMS** Calcd for C<sub>12</sub>H<sub>14</sub>NO<sub>4</sub> [M+H<sup>+</sup>]: 236.0917; Found: 236.0911.

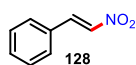



Compound **128** was isolated in 77% yield following the general conditions D.  $^1\text{H NMR}$  (500 MHz,  $\text{CDCl}_3$ )  $\delta$  8.01 (d,  $J = 13.7$  Hz, 1H), 7.59 (d,  $J = 13.7$  Hz, 1H), 7.57 – 7.54 (m, 2H), 7.53 – 7.48 (m, 1H), 7.48 – 7.43 (m, 2H).<sup>29</sup>

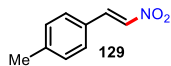

Compound **129** was isolated in 75% yield following the general conditions D.  $^1\text{H NMR}$  (500 MHz,  $\text{CDCl}_3$ )  $\delta$  7.98 (d,  $J = 13.6$  Hz, 1H), 7.56 (d,  $J = 13.6$  Hz, 1H), 7.44 (d,  $J = 8.1$  Hz, 2H), 7.26 (t,  $J = 3.9$  Hz, 2H), 2.41 (s, 3H).  $^{13}\text{C NMR}$  (126 MHz,  $\text{CDCl}_3$ )  $\delta$  143.22, 139.26, 136.48, 130.29, 129.32, 127.47, 21.79.<sup>29</sup>

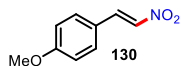

Compound **130** was isolated in 73% yield following the general conditions D.  $^1\text{H NMR}$  (500 MHz,  $\text{CDCl}_3$ )  $\delta$  7.98 (d,  $J = 13.6$  Hz, 1H), 7.55 – 7.48 (m, 3H), 6.96 (d,  $J = 8.6$  Hz, 2H), 3.87 (s, 3H).  $^{13}\text{C NMR}$  (126 MHz,  $\text{CDCl}_3$ )  $\delta$  163.09, 139.16, 135.20, 131.30, 122.71, 115.08, 55.68.<sup>29</sup>

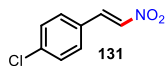

Compound **131** was isolated in 80% yield following the general conditions D.  $^1\text{H NMR}$  (500 MHz,  $\text{CDCl}_3$ )  $\delta$  7.96 (d,  $J = 13.7$  Hz, 1H), 7.56 (d,  $J = 13.7$  Hz, 1H), 7.49 (d,  $J = 8.5$  Hz, 2H), 7.43 (d,  $J = 8.5$  Hz, 2H).  $^{13}\text{C NMR}$  (126 MHz,  $\text{CDCl}_3$ )  $\delta$  138.43, 137.77, 137.56, 130.37, 129.87, 128.67.<sup>29</sup>

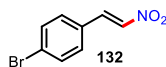

Compound **132** was isolated in 81% yield following the general conditions D.  $^1\text{H NMR}$  (500 MHz,  $\text{CDCl}_3$ )  $\delta$  7.95 (d,  $J = 13.7$  Hz, 1H), 7.62 – 7.55 (m, 3H), 7.43 – 7.40 (m, 2H).<sup>29</sup>

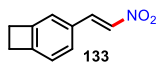

Compound **133** was isolated in 88% yield following the general conditions D.  $^1\text{H NMR}$  (500 MHz,  $\text{CDCl}_3$ )  $\delta$  8.00 (d,  $J = 13.6$  Hz, 1H), 7.55 (d,  $J = 13.6$  Hz, 1H), 7.38 (d,  $J = 7.5$  Hz, 1H), 7.24 (s, 1H), 7.13 (d,  $J = 7.6$  Hz, 1H), 3.23 (s, 4H).  $^{13}\text{C NMR}$  (126 MHz,

CDCl<sub>3</sub>)  $\delta$  151.48, 147.22, 140.61, 136.09, 129.42, 128.91, 123.69, 122.44, 30.13, 29.52.<sup>29</sup>

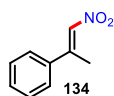

Compound **134** was isolated in 75% yield following the general conditions D. <sup>1</sup>H NMR (500 MHz, CDCl<sub>3</sub>)  $\delta$  7.48 – 7.41 (m, 5H), 7.31 (d,  $J$  = 1.3 Hz, 1H), 2.65 (s, 3H). <sup>13</sup>C NMR (126 MHz, CDCl<sub>3</sub>)  $\delta$  150.05, 138.47, 136.51, 130.50, 129.18, 126.98, 18.73.<sup>30</sup>

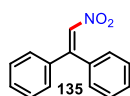

Compound **135** was isolated in 75% yield following the general conditions D. <sup>1</sup>H NMR (500 MHz, CDCl<sub>3</sub>)  $\delta$  7.47 – 7.43 (m, 5H), 7.39 (t,  $J$  = 7.7 Hz, 2H), 7.29 (d,  $J$  = 7.9 Hz, 2H), 7.23 (dd,  $J$  = 7.0, 1.5 Hz, 2H). <sup>13</sup>C NMR (126 MHz, CDCl<sub>3</sub>)  $\delta$  150.61, 137.22, 135.66, 134.52, 131.03, 129.45, 129.04, 129.01, 128.93, 128.63.<sup>29</sup>

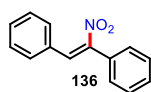

Compound **136** was isolated in 70% yield following the general conditions D. <sup>1</sup>H NMR (500 MHz, CDCl<sub>3</sub>)  $\delta$  8.24 (s, 1H), 7.53 – 7.46 (m, 3H), 7.37 – 7.30 (m, 3H), 7.23 (t,  $J$  = 7.7 Hz, 2H), 7.10 (d,  $J$  = 7.7 Hz, 2H). <sup>13</sup>C NMR (126 MHz, CDCl<sub>3</sub>)  $\delta$  149.86, 134.89, 131.39, 131.24, 130.87, 130.72, 130.19, 129.35, 128.85.<sup>31</sup>

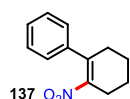

Compound **137** was isolated in 75% yield following the general conditions D. <sup>1</sup>H NMR (500 MHz, CDCl<sub>3</sub>)  $\delta$  7.36 – 7.31 (m, 3H), 7.19 – 7.12 (m, 2H), 2.75 – 2.67 (m, 2H), 2.52 – 2.46 (m, 2H), 1.91 – 1.84 (m, 2H), 1.81 – 1.76 (m, 2H).<sup>32</sup>

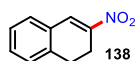

Compound **138** was isolated in 78% yield following the general conditions D. <sup>1</sup>H NMR (500 MHz, CDCl<sub>3</sub>)  $\delta$  7.85 (s, 1H), 7.38 – 7.30 (m, 2H), 7.28 (d,  $J$  = 7.4 Hz, 1H), 7.23 (d,  $J$  = 7.3 Hz, 1H), 3.06 (t,  $J$  = 8.0 Hz, 2H), 2.99 (t, 2H).<sup>33</sup>

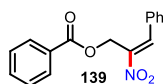

Compound **139** was isolated in 77% yield following the general conditions D. **<sup>1</sup>H NMR** (500 MHz, CDCl<sub>3</sub>) δ 8.45 (s, 1H), 8.10 – 8.03 (m, 2H), 7.60 (t, *J* = 7.4 Hz, 1H), 7.54 – 7.51 (m, 2H), 7.50 – 7.46 (m, 5H), 5.47 (s, 2H). **<sup>13</sup>C NMR** (126 MHz, CDCl<sub>3</sub>) δ 166.02, 145.42, 140.30, 133.58, 131.45, 131.10, 130.21, 129.95, 129.45, 129.38, 128.64, 58.47. **HRMS** Calcd for C<sub>16</sub>H<sub>13</sub>NNaO<sub>4</sub> [M+Na<sup>+</sup>]: 306.0737; Found: 306.0733.<sup>34</sup>

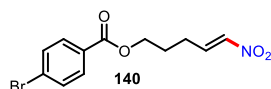

Compound **140** was isolated in 89% yield following the general conditions D. **<sup>1</sup>H NMR** (500 MHz, CDCl<sub>3</sub>) δ 7.90 – 7.85 (m, 2H), 7.61 – 7.55 (m, 2H), 7.37 – 7.27 (m, 1H), 7.03 (d, *J* = 13.4 Hz, 1H), 4.37 (t, *J* = 6.2 Hz, 2H), 2.49 – 2.40 (m, 2H), 2.05 – 1.97 (m, 2H). **<sup>13</sup>C NMR** (126 MHz, CDCl<sub>3</sub>) δ 165.81, 141.21, 140.21, 131.95, 131.18, 128.87, 128.46, 64.05, 27.15, 25.47. **HRMS** Calcd for C<sub>12</sub>H<sub>12</sub>BrNNaO<sub>4</sub> [M+Na<sup>+</sup>]: 335.9842; Found: 335.9830.

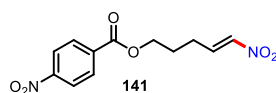

Compound **141** was isolated in 85% yield following the general conditions D. **<sup>1</sup>H NMR** (500 MHz, CDCl<sub>3</sub>) δ 8.30 – 8.26 (m, 2H), 8.21 – 8.17 (m, 2H), 7.36 – 7.27 (m, 1H), 7.04 (d, *J* = 13.4 Hz, 1H), 4.43 (t, *J* = 6.2 Hz, 2H), 2.47 (q, *J* = 7.0 Hz, 2H), 2.07 – 2.02 (m, 2H). **<sup>13</sup>C NMR** (126 MHz, CDCl<sub>3</sub>) δ 164.61, 150.78, 140.96, 140.27, 135.33, 130.79, 123.71, 64.74, 27.08, 25.39. **HRMS** Calcd for C<sub>12</sub>H<sub>12</sub>N<sub>2</sub>NaO<sub>6</sub> [M+Na<sup>+</sup>]: 303.0588; Found: 303.0580.

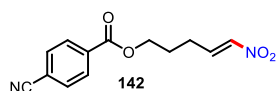

Compound **142** was isolated in 80% yield following the general conditions D. **<sup>1</sup>H NMR** (500 MHz, CDCl<sub>3</sub>) δ 8.11 (d, *J* = 8.5 Hz, 2H), 7.74 (d, *J* = 8.5 Hz, 2H), 7.37 – 7.27 (m, 1H), 7.03 (dt, *J* = 13.4, 1.4 Hz, 1H), 4.41 (t, *J* = 6.2 Hz, 2H), 2.46 (m, *J* = 7.5, 1.4 Hz, 2H), 2.09 – 1.95 (m, 2H). **<sup>13</sup>C NMR** (126 MHz, CDCl<sub>3</sub>) δ 164.86, 141.04, 140.22,

133.73, 132.40, 130.15, 117.95, 116.70, 64.59, 27.04, 25.38. **HRMS** Calcd for  $C_{13}H_{12}N_2NaO_4$  [ $M+Na^+$ ]: 283.0689; Found: 283.0693.

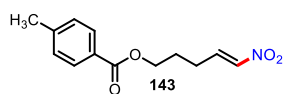

Compound **143** was isolated in 75% yield following the general conditions D.  **$^1H$  NMR** (500 MHz,  $CDCl_3$ )  $\delta$  7.91 (d,  $J = 8.0$  Hz, 2H), 7.39 – 7.28 (m, 1H), 7.24 (d,  $J = 7.9$  Hz, 2H), 7.03 (d,  $J = 13.4$  Hz, 1H), 4.36 (t,  $J = 6.1$  Hz, 2H), 2.45 (q,  $J = 7.4$  Hz, 2H), 2.41 (s, 3H), 2.08 – 1.95 (m, 2H).  **$^{13}C$  NMR** (126 MHz,  $CDCl_3$ )  $\delta$  166.60, 144.02, 141.44, 140.14, 129.68, 129.29, 127.24, 63.57, 27.22, 25.52, 21.78. **HRMS** Calcd for  $C_{13}H_{15}NNaO_4$  [ $M+Na^+$ ]: 272.0893; Found: 272.0894.

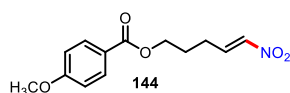

Compound **144** was isolated in 75% yield following the general conditions D.  **$^1H$  NMR** (500 MHz,  $CDCl_3$ )  $\delta$  7.96 (d,  $J = 8.8$  Hz, 2H), 7.37 – 7.25 (m, 1H), 7.01 (d,  $J = 13.4$  Hz, 1H), 6.91 (d,  $J = 8.8$  Hz, 2H), 4.33 (t,  $J = 6.2$  Hz, 2H), 3.84 (s, 3H), 2.43 (q,  $J = 7.1$  Hz, 2H), 2.01 – 1.94 (m, 2H).  **$^{13}C$  NMR** (126 MHz,  $CDCl_3$ )  $\delta$  166.19, 163.58, 141.50, 140.05, 131.63, 122.32, 113.76, 63.42, 55.51, 27.18, 25.48. **HRMS** Calcd for  $C_{13}H_{15}NNaO_5$  [ $M+Na^+$ ]: 288.0842; Found: 288.0844.

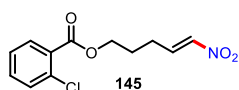

Compound **145** was isolated in 90% yield following the general conditions D.  **$^1H$  NMR** (500 MHz,  $CDCl_3$ )  $\delta$  7.81 – 7.77 (m, 1H), 7.46 – 7.40 (m, 2H), 7.34 – 7.26 (m, 2H), 7.02 (d,  $J = 13.4$  Hz, 1H), 4.39 (t,  $J = 6.1$  Hz, 2H), 2.47 (q,  $J = 7.4$  Hz, 2H), 2.06 – 1.96 (m, 2H).  **$^{13}C$  NMR** (126 MHz,  $CDCl_3$ )  $\delta$  165.79, 141.17, 140.26, 133.69, 132.86, 131.49, 131.26, 130.07, 126.82, 64.29, 27.07, 25.44. **HRMS** Calcd for  $C_{12}H_{12}ClNNaO_4$  [ $M+Na^+$ ]: 292.0347; Found: 292.0348.

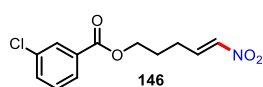

Compound **146** was isolated in 90% yield following the general conditions D.  **$^1H$  NMR** (500 MHz,  $CDCl_3$ )  $\delta$  7.99 (s, 1H), 7.90 (d,  $J = 7.8$  Hz, 1H), 7.54 (d,  $J = 8.0$  Hz, 1H),

7.39 (t,  $J = 7.9$  Hz, 1H), 7.35 – 7.27 (m, 1H), 7.03 (d,  $J = 13.4$  Hz, 1H), 4.38 (t,  $J = 6.2$  Hz, 2H), 2.46 (q,  $J = 7.4$  Hz, 2H), 2.12 – 1.93 (m, 2H).  $^{13}\text{C NMR}$  (126 MHz,  $\text{CDCl}_3$ )  $\delta$  165.32, 141.13, 140.24, 134.76, 133.33, 131.73, 129.93, 129.73, 127.81, 64.16, 27.14, 25.42. **HRMS** Calcd for  $\text{C}_{12}\text{H}_{12}\text{ClNNaO}_4$  [ $\text{M}+\text{Na}^+$ ]: 292.0347; Found: 292.0348.

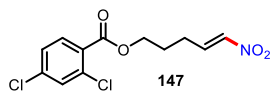

Compound **147** was isolated in 89% yield following the general conditions D.  $^1\text{H NMR}$  (500 MHz,  $\text{CDCl}_3$ )  $\delta$  7.79 (d,  $J = 8.4$  Hz, 1H), 7.48 (d,  $J = 1.9$  Hz, 1H), 7.33 – 7.27 (m, 2H), 7.03 (d,  $J = 13.4$  Hz, 1H), 4.39 (t,  $J = 6.2$  Hz, 2H), 2.46 (q,  $J = 7.5$  Hz, 2H), 2.04 – 1.98 (m, 2H).  $^{13}\text{C NMR}$  (126 MHz,  $\text{CDCl}_3$ )  $\delta$  164.86, 141.06, 140.29, 138.74, 134.94, 132.65, 131.24, 128.21, 127.28, 64.51, 27.05, 25.44. **HRMS** Calcd for  $\text{C}_{12}\text{H}_{11}\text{Cl}_2\text{NNaO}_4$  [ $\text{M}+\text{Na}^+$ ]: 325.9957; Found: 325.9958.

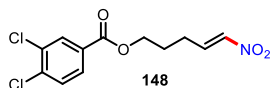

Compound **148** was isolated in 89% yield following the general conditions D.  $^1\text{H NMR}$  (500 MHz,  $\text{CDCl}_3$ )  $\delta$  8.09 (d,  $J = 1.9$  Hz, 1H), 7.84 (dd,  $J = 8.4, 1.9$  Hz, 1H), 7.54 (d,  $J = 8.4$  Hz, 1H), 7.36 – 7.28 (m, 1H), 7.03 (d,  $J = 13.4$  Hz, 1H), 4.39 (t,  $J = 6.2$  Hz, 2H), 2.45 (qd,  $J = 7.5, 1.3$  Hz, 2H), 2.08 – 1.97 (m, 2H).  $^{13}\text{C NMR}$  (126 MHz,  $\text{CDCl}_3$ )  $\delta$  164.71, 141.01, 140.29, 138.05, 133.24, 131.62, 130.80, 129.81, 128.75, 64.40, 27.14, 25.43. **HRMS** Calcd for  $\text{C}_{12}\text{H}_{11}\text{Cl}_2\text{NNaO}_4$  [ $\text{M}+\text{Na}^+$ ]: 325.9957; Found: 325.9948.

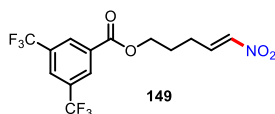

Compound **149** was isolated in 88% yield following the general conditions D.  $^1\text{H NMR}$  (500 MHz,  $\text{CDCl}_3$ )  $\delta$  8.46 (s, 2H), 8.08 (s, 1H), 7.38 – 7.27 (m, 1H), 7.04 (d,  $J = 13.4$  Hz, 1H), 4.47 (t,  $J = 6.4$  Hz, 2H), 2.47 (qd,  $J = 7.6, 1.4$  Hz, 2H), 2.12 – 2.02 (m, 2H).  $^{13}\text{C NMR}$  (126 MHz,  $\text{CDCl}_3$ )  $\delta$  163.93, 140.74, 140.35, 132.44 (q,  $J = 34.1$  Hz), 132.17, 129.82 (d,  $J = 3.1$  Hz), 126.82 – 126.59 (m), 124.02, 121.85, 64.96, 27.05, 25.27.  $^{19}\text{F NMR}$  (471 MHz,  $\text{CDCl}_3$ )  $\delta$  -63.01 (s, 6F). **HRMS** Calcd for  $\text{C}_{14}\text{H}_{11}\text{F}_6\text{NNaO}_4$  [ $\text{M}+\text{Na}^+$ ]: 394.0484; Found: 394.0486.

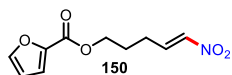

Compound **150** was isolated in 80% yield following the general conditions D.  $^1\text{H NMR}$  (500 MHz,  $\text{CDCl}_3$ )  $\delta$  7.54 (d,  $J = 0.7$  Hz, 1H), 7.31 – 7.21 (m, 1H), 7.13 (d,  $J = 3.5$  Hz, 1H), 6.98 (d,  $J = 13.4$  Hz, 1H), 6.52 – 6.44 (m, 1H), 4.30 (t,  $J = 6.2$  Hz, 2H), 2.43 – 2.34 (m, 2H), 1.99 – 1.87 (m, 2H).  $^{13}\text{C NMR}$  (126 MHz,  $\text{CDCl}_3$ )  $\delta$  158.46, 146.55, 144.31, 141.36, 140.01, 118.20, 111.96, 63.61, 26.95, 25.28.<sup>33</sup>

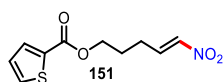

Compound **151** was isolated in 79% yield following the general conditions D.  $^1\text{H NMR}$  (500 MHz,  $\text{CDCl}_3$ )  $\delta$  7.80 (dd,  $J = 3.7, 1.1$  Hz, 1H), 7.57 (dd,  $J = 5.0, 1.1$  Hz, 1H), 7.38 – 7.27 (m, 1H), 7.14 – 7.08 (m, 1H), 7.03 (d,  $J = 13.4$  Hz, 1H), 4.35 (t,  $J = 6.2$  Hz, 2H), 2.44 (qd,  $J = 7.5, 1.3$  Hz, 2H), 2.05 – 1.93 (m, 2H).  $^{13}\text{C NMR}$  (126 MHz,  $\text{CDCl}_3$ )  $\delta$  162.14, 141.30, 140.20, 133.77, 133.41, 132.79, 128.00, 63.87, 27.15, 25.44. **HRMS** Calcd for  $\text{C}_{10}\text{H}_{11}\text{NNaO}_5$  [ $\text{M}+\text{Na}^+$ ]: 264.0301; Found: 264.0299.

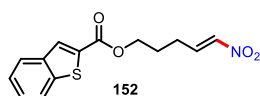

Compound **152** was isolated in 76% yield following the general conditions D.  $^1\text{H NMR}$  (500 MHz,  $\text{CDCl}_3$ )  $\delta$  8.57 (d,  $J = 8.1$  Hz, 1H), 8.38 (s, 1H), 7.88 (d,  $J = 8.1$  Hz, 1H), 7.50 (t,  $J = 7.6$  Hz, 1H), 7.42 (t,  $J = 7.5$  Hz, 1H), 7.37 – 7.29 (m, 1H), 7.04 (d,  $J = 13.4$  Hz, 1H), 4.42 (t,  $J = 6.2$  Hz, 2H), 2.47 (q,  $J = 7.4$  Hz, 2H), 2.12 – 1.93 (m, 2H).  $^{13}\text{C NMR}$  (126 MHz,  $\text{CDCl}_3$ )  $\delta$  162.60, 141.29, 140.18, 140.13, 136.92, 136.71, 126.83, 125.62, 125.24, 124.65, 122.68, 63.40, 27.23, 25.48. **HRMS** Calcd for  $\text{C}_{14}\text{H}_{13}\text{NNaO}_4\text{S}$  [ $\text{M}+\text{Na}^+$ ]: 314.0457; Found: 314.0456.

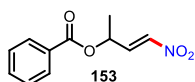

Compound **153** was isolated in 73% yield following the general conditions D.  $^1\text{H NMR}$  (500 MHz,  $\text{CDCl}_3$ )  $\delta$  8.10 – 8.03 (m, 2H), 7.66 – 7.58 (m, 1H), 7.48 (t,  $J = 7.8$  Hz, 2H), 7.31 (dd,  $J = 13.4, 4.7$  Hz, 1H), 7.17 (dd,  $J = 13.4, 1.6$  Hz, 1H), 5.91 – 5.83 (m, 1H), 1.58 (d,  $J = 1.0$  Hz, 3H).  $^{13}\text{C NMR}$  (126 MHz,  $\text{CDCl}_3$ )  $\delta$  165.31, 140.40, 139.84, 133.78,

129.84, 129.38, 128.75, 66.83, 19.86. **HRMS** Calcd for C<sub>11</sub>H<sub>11</sub>NNaO<sub>4</sub> [M+Na<sup>+</sup>]: 244.0580; Found: 244.0581.

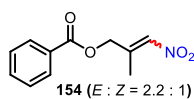

Compound **154** was isolated in 70% yield following the general conditions D. **<sup>1</sup>H NMR** (500 MHz, CDCl<sub>3</sub>) δ 8.11 (dd, *J* = 8.4, 1.1 Hz, 1.35H), 8.07 (dd, *J* = 8.3, 1.1 Hz, 0.73H), 7.66 – 7.61 (m, 1H), 7.60 (s, 1H), 7.52 – 7.45 (m, 2H), 5.19 (s, 0.62H), 4.93 (s, 1.38H), 1.98 (d, *J* = 1.2 Hz, 1.98H), 1.91 (d, *J* = 1.3 Hz, 0.92H). **<sup>13</sup>C NMR** (126 MHz, CDCl<sub>3</sub>) δ 163.01, 162.76, 138.35, 136.65, 134.16, 130.18, 130.16, 128.87, 128.83, 112.46, 111.13, 79.63, 74.53, 16.71, 13.12. **HRMS** Calcd for C<sub>11</sub>H<sub>11</sub>NNaO<sub>4</sub> [M+Na<sup>+</sup>]: 244.0580; Found: 244.0581.

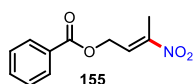

Compound **155** was isolated in 70% yield following the general conditions D. **<sup>1</sup>H NMR** (500 MHz, CDCl<sub>3</sub>) δ 8.05 (d, *J* = 7.9 Hz, 2H), 7.60 (t, *J* = 7.4 Hz, 1H), 7.46 (t, *J* = 7.6 Hz, 2H), 7.24 (t, *J* = 13.7, 7.2 Hz, 1H), 5.03 (d, *J* = 6.5 Hz, 2H), 2.30 (s, 3H). **<sup>13</sup>C NMR** (126 MHz, CDCl<sub>3</sub>) δ 166.16, 149.82, 133.65, 129.85, 129.27, 129.13, 128.67, 60.15, 13.23. **HRMS** Calcd for C<sub>11</sub>H<sub>11</sub>NNaO<sub>4</sub> [M+Na<sup>+</sup>]: 244.0580; Found: 244.0580.

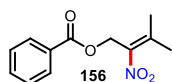

Compound **156** was isolated in 60% yield following the general conditions D. **<sup>1</sup>H NMR** (500 MHz, CDCl<sub>3</sub>) δ 8.03 – 7.98 (m, 2H), 7.56 (t, *J* = 7.5 Hz, 1H), 7.43 (t, *J* = 7.8 Hz, 2H), 5.31 (s, 2H), 2.10 (s, 3H), 2.09 (s, 3H). **<sup>13</sup>C NMR** (126 MHz, CDCl<sub>3</sub>) δ 166.17, 144.11, 143.82, 133.51, 129.91, 129.43, 128.58, 60.01, 22.26, 21.94. **HRMS** Calcd for C<sub>12</sub>H<sub>13</sub>NNaO<sub>4</sub> [M+Na<sup>+</sup>]: 258.0737; Found: 258.0737.

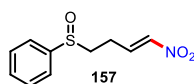

Compound **157** was isolated in 76% yield following the general conditions D. **<sup>1</sup>H NMR** (500 MHz, CDCl<sub>3</sub>) δ 7.40 – 7.34 (m, 2H), 7.32 (t, *J* = 7.6 Hz, 2H), 7.29 – 7.22 (m, 2H), 6.99 (d, *J* = 13.4 Hz, 1H), 3.07 (t, *J* = 7.0 Hz, 2H), 2.57 (qd, *J* = 7.2, 1.4 Hz, 2H). **<sup>13</sup>C NMR**

**NMR** (126 MHz, CDCl<sub>3</sub>)  $\delta$  140.68, 139.80, 134.76, 130.63, 129.36, 127.17, 32.32, 28.32. **HRMS** Calcd for C<sub>10</sub>H<sub>11</sub>NNaO<sub>3</sub>S [M+Na<sup>+</sup>]: 248.0352; Found: 248.0342.

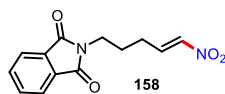

Compound **158** was isolated in 83% yield following the general conditions D. **<sup>1</sup>H NMR** (500 MHz, CDCl<sub>3</sub>)  $\delta$  7.87 – 7.82 (m, 2H), 7.75 – 7.69 (m, 2H), 7.28 – 7.20 (m, 1H), 7.03 (d, *J* = 13.4 Hz, 1H), 3.74 (t, *J* = 6.8 Hz, 2H), 2.34 (q, *J* = 7.4 Hz, 2H), 1.98 – 1.87 (m, 2H). **<sup>13</sup>C NMR** (126 MHz, CDCl<sub>3</sub>)  $\delta$  168.43, 140.92, 140.29, 134.28, 132.01, 123.47, 37.09, 26.85, 25.92.<sup>35</sup>

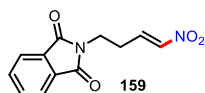

Compound **159** was isolated in 85% yield following the general conditions D. **<sup>1</sup>H NMR** (500 MHz, CDCl<sub>3</sub>)  $\delta$  7.87 – 7.81 (m, 2H), 7.76 – 7.70 (m, 2H), 7.22 (dd, *J* = 14.1, 6.8 Hz, 1H), 7.02 (d, *J* = 13.5 Hz, 1H), 3.89 (t, *J* = 6.9 Hz, 2H), 2.69 (q, *J* = 7.0 Hz, 2H). **<sup>13</sup>C NMR** (126 MHz, CDCl<sub>3</sub>)  $\delta$  168.09, 141.11, 138.02, 134.39, 131.89, 123.62, 35.92, 27.81.<sup>33</sup>

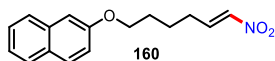

Compound **160** was isolated in 80% yield following the general conditions D. **<sup>1</sup>H NMR** (500 MHz, CDCl<sub>3</sub>)  $\delta$  7.83 – 7.72 (m, 3H), 7.51 – 7.44 (m, 1H), 7.41 – 7.34 (m, 1H), 7.33 – 7.23 (m, 1H), 7.21 – 7.11 (m, 2H), 7.01 (d, *J* = 13.4 Hz, 1H), 4.08 (t, *J* = 6.1 Hz, 2H), 2.39 – 2.27 (m, 2H), 1.93 – 1.82 (m, 2H), 1.79 – 1.66 (m, 2H). **<sup>13</sup>C NMR** (126 MHz, CDCl<sub>3</sub>)  $\delta$  156.88, 142.18, 139.87, 134.64, 129.51, 129.06, 127.73, 126.77, 126.48, 123.72, 118.89, 106.68, 67.25, 28.69, 28.17, 24.55.<sup>29</sup>

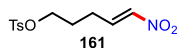

Compound **161** was isolated in 75% yield following the general conditions D. **<sup>1</sup>H NMR** (500 MHz, CDCl<sub>3</sub>)  $\delta$  7.75 (d, *J* = 8.1 Hz, 2H), 7.34 (d, *J* = 8.1 Hz, 2H), 7.13 – 7.05 (m, 1H), 6.84 (d, *J* = 13.4 Hz, 1H), 4.03 (t, *J* = 5.9 Hz, 2H), 2.43 (s, 3H), 2.32 (q, *J* = 7.3 Hz, 2H), 1.91 – 1.79 (m, 2H). **<sup>13</sup>C NMR** (126 MHz, CDCl<sub>3</sub>)  $\delta$  145.27, 140.39, 140.28, 132.68, 130.02, 127.81, 68.79, 26.96, 24.40, 21.60.<sup>29</sup>



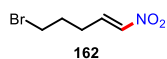

Compound **162** was isolated in 80% yield following the general conditions D.  $^1\text{H NMR}$  (500 MHz,  $\text{CDCl}_3$ )  $\delta$  7.29 – 7.19 (m, 1H), 7.03 (dt,  $J = 13.4, 1.4$  Hz, 1H), 3.43 (t,  $J = 6.3$  Hz, 2H), 2.51 – 2.44 (m, 2H), 2.12 – 2.02 (m, 2H).<sup>36</sup>

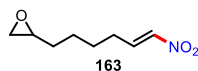

Compound **163** was isolated in 65% yield following the general conditions D.  $^1\text{H NMR}$  (500 MHz,  $\text{CDCl}_3$ )  $\delta$  7.25 – 7.20 (m, 1H), 7.00 – 6.92 (m, 1H), 2.93 – 2.82 (m, 1H), 2.77 – 2.67 (m, 1H), 2.47 – 2.39 (m, 1H), 2.32 – 2.21 (m, 2H), 1.67 – 1.53 (m, 4H), 1.51 – 1.45 (m, 2H).  $^{13}\text{C NMR}$  (126 MHz,  $\text{CDCl}_3$ )  $\delta$  142.27, 139.87, 52.04, 47.00, 32.16, 28.41, 27.62, 25.69.<sup>33</sup>

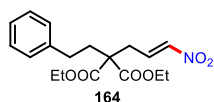

Compound **164** was isolated in 83% yield following the general conditions D.  $^1\text{H NMR}$  (500 MHz,  $\text{CDCl}_3$ )  $\delta$  7.29 (t,  $J = 7.5$  Hz, 2H), 7.24 – 7.19 (m, 2H), 7.16 (d,  $J = 7.1$  Hz, 2H), 6.97 (d,  $J = 13.4$  Hz, 1H), 4.23 (q,  $J = 7.1$  Hz, 4H), 2.86 (dd,  $J = 8.1, 1.2$  Hz, 2H), 2.61 – 2.52 (m, 2H), 2.25 – 2.16 (m, 2H), 1.27 (t,  $J = 4.9$  Hz, 6H).  $^{13}\text{C NMR}$  (126 MHz,  $\text{CDCl}_3$ )  $\delta$  170.15, 141.62, 140.65, 137.24, 128.74, 128.46, 126.54, 62.08, 57.28, 35.57, 32.33, 30.82, 30.34, 29.84, 14.23. **HRMS** Calcd for  $\text{C}_{18}\text{H}_{23}\text{NNaO}_6$  [ $\text{M}+\text{Na}^+$ ]: 372.1418; Found: 372.1403.

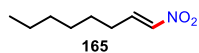

Compound **165** was isolated in 80% yield following the general conditions D.  $^1\text{H NMR}$  (500 MHz,  $\text{CDCl}_3$ )  $\delta$  7.31 – 7.23 (m, 1H), 6.98 (d,  $J = 13.4$  Hz, 1H), 2.27 (qd,  $J = 7.5, 1.3$  Hz, 2H), 1.55 – 1.47 (m, 2H), 1.39 – 1.28 (m, 6H), 0.89 (t,  $J = 6.8$  Hz, 3H).<sup>37</sup>

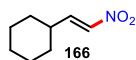

Compound **166** was isolated in 77% yield following the general conditions D.  $^1\text{H NMR}$  (500 MHz,  $\text{CDCl}_3$ )  $\delta$  7.22 (dd,  $J = 13.5, 7.2$  Hz, 1H), 6.93 (dd,  $J = 13.5, 1.3$  Hz, 1H),

2.31 – 2.20 (m, 1H), 1.83 – 1.76 (m, 4H), 1.73 – 1.67 (m, 1H), 1.37 – 1.30 (m, 2H), 1.23 – 1.16 (m, 3H).<sup>38</sup>

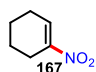

Compound **167** was isolated in 75% yield following the general conditions D. <sup>1</sup>H NMR (500 MHz, CDCl<sub>3</sub>) δ 7.32 (m, 1H), 2.58 (m, 2H), 2.38 – 2.29 (m, 2H), 1.83 – 1.73 (m, 2H), 1.67 – 1.59 (m, 2H).<sup>29</sup>

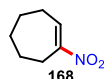

Compound **168** was isolated in 78% yield following the general conditions D. <sup>1</sup>H NMR (500 MHz, CDCl<sub>3</sub>) δ 7.44 (t, *J* = 6.7 Hz, 1H), 2.89 – 2.84 (m, 2H), 2.38 – 2.34 (m, 2H), 1.81 – 1.77 (m, 2H), 1.69 – 1.64 (m, 4H).<sup>39</sup>

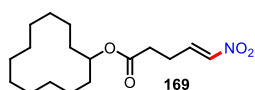

Compound **169** was isolated in 82% yield following the general conditions D. <sup>1</sup>H NMR (500 MHz, CDCl<sub>3</sub>) δ 7.30 – 7.21 (m, 1H), 7.01 (d, *J* = 13.4 Hz, 1H), 5.07 – 4.99 (m, 1H), 2.61 – 2.56 (m, 2H), 2.50 (t, *J* = 7.0 Hz, 2H), 1.74 – 1.66 (m, 2H), 1.51 – 1.45 (m, 2H), 1.42 – 1.28 (m, 18H). <sup>13</sup>C NMR (126 MHz, CDCl<sub>3</sub>) δ 171.31, 140.57, 140.42, 73.26, 32.46, 29.24, 24.13, 23.91, 23.48, 23.31, 21.05. HRMS Calcd for C<sub>17</sub>H<sub>29</sub>NNaO<sub>4</sub> [M+Na<sup>+</sup>]: 334.1989; Found: 334.1989.

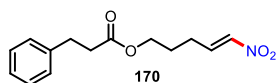

Compound **170** was isolated in 89% yield following the general conditions D. <sup>1</sup>H NMR (500 MHz, CDCl<sub>3</sub>) δ 7.29 (t, *J* = 7.5 Hz, 2H), 7.25 – 7.16 (m, 4H), 6.95 (d, *J* = 13.4 Hz, 1H), 4.11 (t, *J* = 6.2 Hz, 2H), 2.95 (t, *J* = 7.7 Hz, 2H), 2.65 (t, *J* = 7.7 Hz, 2H), 2.24 (qd, *J* = 7.5, 1.4 Hz, 2H), 1.88 – 1.75 (m, 2H). <sup>13</sup>C NMR (126 MHz, CDCl<sub>3</sub>) δ 172.86, 141.31, 140.40, 140.10, 128.66, 128.41, 126.49, 63.16, 35.86, 31.07, 27.02, 25.23. HRMS Calcd for C<sub>14</sub>H<sub>16</sub>NO<sub>4</sub> [M-H<sup>+</sup>]: 262.1085; Found: 262.1093.

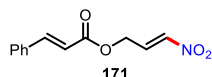

Compound **171** was isolated in 76% yield following the general conditions D.  $^1\text{H NMR}$  (500 MHz,  $\text{CDCl}_3$ )  $\delta$  7.77 (d,  $J = 16.0$  Hz, 1H), 7.56 (dd,  $J = 6.6, 2.7$  Hz, 2H), 7.46 – 7.38 (m, 3H), 7.34 (dt,  $J = 13.4, 4.3$  Hz, 1H), 7.20 (dt,  $J = 13.4, 1.8$  Hz, 1H), 6.48 (d,  $J = 16.0$  Hz, 1H), 4.99 (dd,  $J = 4.2, 2.0$  Hz, 2H).  $^{13}\text{C NMR}$  (126 MHz,  $\text{CDCl}_3$ )  $\delta$  165.89, 146.79, 140.28, 135.81, 134.00, 130.98, 129.14, 128.40, 116.45, 59.57.<sup>33</sup>

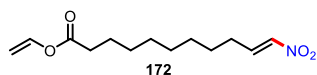

Compound **172** was isolated in 78% yield following the general conditions D.  $^1\text{H NMR}$  (500 MHz,  $\text{CDCl}_3$ )  $\delta$  7.29 – 7.21 (m, 2H), 6.96 (d,  $J = 13.4$  Hz, 1H), 4.85 (dd,  $J = 14.0, 1.4$  Hz, 1H), 4.54 (dd,  $J = 6.3, 1.4$  Hz, 1H), 2.36 (t,  $J = 7.5$  Hz, 2H), 2.24 (q,  $J = 7.4$  Hz, 2H), 1.65 – 1.60 (m, 2H), 1.52 – 1.46 (m, 2H), 1.32 – 1.28 (m, 8H).  $^{13}\text{C NMR}$  (126 MHz,  $\text{CDCl}_3$ )  $\delta$  170.85, 142.78, 141.23, 139.65, 97.53, 33.91, 29.05, 29.03, 28.96, 28.46, 27.73, 24.56. **HRMS** Calcd for  $\text{C}_{13}\text{H}_{21}\text{NNaO}_4$  [ $\text{M}+\text{Na}^+$ ]: 278.1363; Found: 278.1364.

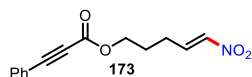

Compound **173** was isolated in 79% yield following the general conditions D.  $^1\text{H NMR}$  (500 MHz,  $\text{CDCl}_3$ )  $\delta$  7.59 (d,  $J = 7.2$  Hz, 2H), 7.46 (t,  $J = 7.5$  Hz, 1H), 7.38 (t,  $J = 7.6$  Hz, 2H), 7.33 – 7.25 (m, 1H), 7.03 (d,  $J = 13.4$  Hz, 1H), 4.28 (t,  $J = 6.2$  Hz, 2H), 2.49 – 2.37 (m, 2H), 2.05 – 1.88 (m, 2H).  $^{13}\text{C NMR}$  (126 MHz,  $\text{CDCl}_3$ )  $\delta$  153.96, 141.02, 140.27, 133.14, 130.94, 128.74, 119.47, 87.05, 80.35, 64.67, 26.85, 25.23. **HRMS** Calcd for  $\text{C}_{14}\text{H}_{13}\text{NNaO}_4$  [ $\text{M}+\text{Na}^+$ ]: 282.0737; Found: 282.0740.

## 7.2 Nitration of natural products and drug derivatives

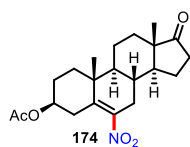

Compound **174** was isolated in 68% yield following the general conditions D.  $^1\text{H NMR}$  (500 MHz,  $\text{CDCl}_3$ )  $\delta$  4.73 – 4.57 (m, 1H), 2.82 (dd,  $J = 14.2, 4.4$  Hz, 1H), 2.67 – 2.59

(m, 1H), 2.49 (dd,  $J = 19.4, 8.9$  Hz, 1H), 2.34 – 2.20 (m, 2H), 2.16 – 2.09 (m, 1H), 2.03 (s, 3H), 2.01 – 1.96 (m, 2H), 1.92 – 1.80 (m, 2H), 1.77 – 1.70 (m, 1H), 1.66 – 1.55 (m, 3H), 1.54 – 1.46 (m, 1H), 1.42 – 1.28 (m, 3H), 1.17 (s, 3H), 1.11 (td,  $J = 11.7, 4.5$  Hz, 1H), 0.89 (s, 3H).  $^{13}\text{C NMR}$  (126 MHz,  $\text{CDCl}_3$ )  $\delta$  219.76, 170.21, 146.07, 138.03, 71.86, 51.30, 49.20, 47.50, 38.13, 36.28, 35.81, 32.44, 31.37, 31.29, 31.24, 27.07, 21.91, 21.35, 20.45, 19.93, 13.66.<sup>40</sup>

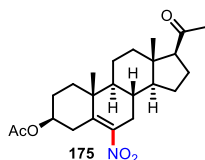

Compound **175** was isolated in 69% yield following the general conditions D.  $^1\text{H NMR}$  (500 MHz,  $\text{CDCl}_3$ )  $\delta$  4.74 – 4.54 (m, 1H), 2.78 (dd,  $J = 14.0, 3.1$  Hz, 1H), 2.61 – 2.45 (m, 2H), 2.29 – 2.15 (m, 3H), 2.13 (s, 3H), 2.03 (s, 3H), 1.77 – 1.56 (m, 8H), 1.47 (d,  $J = 8.9$  Hz, 2H), 1.36 – 1.25 (m, 3H), 1.14 (s, 3H), 1.05 – 0.98 (m, 1H), 0.64 (s, 3H).  $^{13}\text{C NMR}$  (126 MHz,  $\text{CDCl}_3$ )  $\delta$  209.12, 170.25, 146.47, 137.65, 71.97, 63.39, 56.25, 48.94, 43.90, 38.47, 37.98, 36.33, 33.28, 31.64, 31.26, 29.84, 27.10, 24.46, 23.03, 21.36, 21.08, 19.88, 13.31. **HRMS** Calcd for  $\text{C}_{23}\text{H}_{33}\text{NNaO}_5$  [ $\text{M}+\text{Na}^+$ ]: 426.2251; Found: 426.2243.

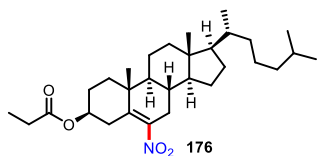

Compound **176** was isolated in 65% yield following the general conditions D.  $^1\text{H NMR}$  (500 MHz,  $\text{CDCl}_3$ )  $\delta$  4.71 – 4.57 (m, 1H), 2.76 (dd,  $J = 14.2, 3.4$  Hz, 1H), 2.51 – 2.42 (m, 1H), 2.29 (q,  $J = 7.5$  Hz, 2H), 2.24 – 2.19 (m, 1H), 2.18 – 2.12 (m, 1H), 2.04 (t,  $J = 6.4$  Hz, 1H), 2.00 – 1.92 (m, 2H), 1.91 – 1.82 (m, 1H), 1.65 – 1.43 (m, 7H), 1.38 – 1.18 (m, 8H), 1.13 – 1.09 (m, 9H), 1.04 – 0.97 (m, 2H), 0.91 (d,  $J = 6.5$  Hz, 3H), 0.86 (dd,  $J = 6.6, 2.1$  Hz, 6H), 0.68 (s, 3H).  $^{13}\text{C NMR}$  (126 MHz,  $\text{CDCl}_3$ )  $\delta$  173.63, 146.80, 137.53, 71.87, 56.17, 56.09, 49.04, 42.43, 39.60, 39.43, 37.94, 36.28, 36.23, 35.85, 33.44, 31.72, 31.28, 28.22, 28.13, 27.87, 27.14, 24.25, 23.95, 22.94, 22.68, 21.08, 19.86, 18.81, 11.93, 9.18. **HRMS** Calcd for  $\text{C}_{30}\text{H}_{49}\text{NNaO}_4$  [ $\text{M}+\text{Na}^+$ ]: 510.3554; Found: 510.3557.

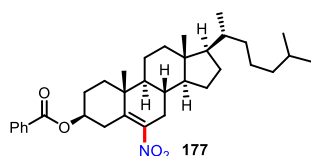

Compound **177** was isolated in 66% yield following the general conditions D. **<sup>1</sup>H NMR** (500 MHz, CDCl<sub>3</sub>) δ 8.02 (d, *J* = 7.9 Hz, 2H), 7.55 (t, *J* = 7.3 Hz, 1H), 7.43 (t, *J* = 7.7 Hz, 2H), 4.95 – 4.83 (m, 1H), 2.92 (dd, *J* = 14.2, 3.2 Hz, 1H), 2.54 – 2.44 (m, 1H), 2.44 – 2.34 (m, 1H), 2.25 – 2.16 (m, 1H), 2.11 (d, *J* = 12.5 Hz, 1H), 2.07 – 1.98 (m, 2H), 1.91 – 1.82 (m, 1H), 1.74 (d, *J* = 14.3 Hz, 1H), 1.68 – 1.55 (m, 3H), 1.54 – 1.44 (m, 2H), 1.39 – 1.23 (m, 6H), 1.18 (s, 3H), 1.16 – 1.05 (m, 7H), 1.02 – 0.97 (m, 1H), 0.92 (d, *J* = 6.5 Hz, 3H), 0.87 (dd, *J* = 6.6, 2.2 Hz, 6H), 0.69 (d, *J* = 3.6 Hz, 3H). **<sup>13</sup>C NMR** (126 MHz, CDCl<sub>3</sub>) δ 165.74, 146.95, 137.45, 133.08, 130.42, 129.71, 128.44, 72.71, 56.17, 56.10, 49.06, 42.45, 39.60, 39.43, 38.01, 36.32, 36.24, 35.85, 33.47, 31.74, 31.36, 28.23, 28.13, 27.23, 24.26, 23.95, 22.95, 22.69, 21.10, 19.92, 18.82, 11.94. **HRMS** Calcd for C<sub>34</sub>H<sub>49</sub>NNaO<sub>4</sub> [M+Na<sup>+</sup>]: 558.3554; Found: 558.3556.

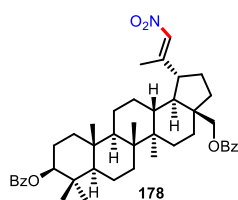

Compound **178** was isolated in 70% yield following the general conditions D. **<sup>1</sup>H NMR** (500 MHz, CDCl<sub>3</sub>) δ 8.04 (t, *J* = 6.8 Hz, 4H), 7.57 – 7.52 (m, 2H), 7.46 – 7.41 (m, 4H), 7.03 (s, 1H), 4.71 (dd, *J* = 11.1, 4.6 Hz, 1H), 4.55 – 4.47 (m, 1H), 4.12 – 4.08 (m, 1H), 2.65 – 2.49 (m, 1H), 2.22 (s, 3H), 2.15 – 2.04 (m, 2H), 1.81 – 1.68 (m, 7H), 1.49 – 1.31 (m, 11H), 1.27 – 1.22 (m, 4H), 1.06 (s, 3H), 1.00 (s, 3H), 0.99 (s, 3H), 0.91 (s, 3H), 0.89 (s, 3H). **<sup>13</sup>C NMR** (126 MHz, CDCl<sub>3</sub>) δ 170.92, 166.63, 166.08, 157.64, 135.14, 133.03, 132.66, 130.88, 130.10, 129.48, 128.41, 128.26, 81.29, 62.71, 60.26, 55.31, 53.48, 49.98, 47.29, 47.02, 42.76, 40.81, 38.29, 38.11, 37.02, 35.05, 33.99, 29.86, 28.05, 26.87, 25.75, 23.67, 20.95, 20.65, 18.10, 16.74, 16.06, 15.93, 14.60, 14.16. **HRMS** Calcd for C<sub>44</sub>H<sub>57</sub>NNaO<sub>6</sub> [M+Na<sup>+</sup>]: 718.4078; Found: 718.4079.

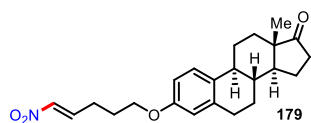

Compound **179** was isolated in 75% yield following the general conditions D.  $^1\text{H NMR}$  (500 MHz,  $\text{CDCl}_3$ )  $\delta$  7.38 – 7.29 (m, 1H), 7.20 (d,  $J = 8.6$  Hz, 1H), 7.01 (d,  $J = 13.4$  Hz, 1H), 6.69 (dd,  $J = 8.5, 2.5$  Hz, 1H), 6.63 (s, 1H), 3.99 (t,  $J = 5.8$  Hz, 2H), 2.94 – 2.86 (m, 2H), 2.54 – 2.46 (m, 3H), 2.42 – 2.37 (m, 1H), 2.28 – 2.22 (m, 1H), 2.18 – 2.10 (m, 1H), 2.02 – 1.96 (m, 3H), 1.66 – 1.41 (m, 8H), 0.91 (s, 3H).  $^{13}\text{C NMR}$  (126 MHz,  $\text{CDCl}_3$ )  $\delta$  221.03, 156.71, 141.95, 140.04, 138.03, 132.59, 126.56, 114.66, 112.17, 66.49, 50.55, 48.14, 44.12, 38.49, 36.01, 31.72, 29.79, 27.72, 26.66, 26.06, 25.52, 21.72, 13.99. **HRMS** Calcd for  $\text{C}_{23}\text{H}_{29}\text{NNaO}_4$  [ $\text{M}+\text{Na}^+$ ]: 406.1989; Found: 406.1983.

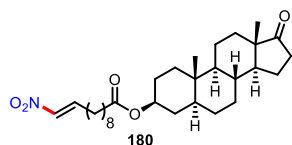

Compound **180** was isolated in 76% yield following the general conditions D.  $^1\text{H NMR}$  (500 MHz,  $\text{CDCl}_3$ )  $\delta$  7.29 – 7.23 (m, 1H), 6.97 (d,  $J = 13.4$  Hz, 1H), 4.72 – 4.64 (m, 1H), 2.46 – 2.38 (m, 1H), 2.25 (t,  $J = 7.3$  Hz, 4H), 2.10 – 2.01 (m, 1H), 1.95 – 1.88 (m, 1H), 1.85 – 1.70 (m, 5H), 1.68 – 1.56 (m, 6H), 1.53 – 1.45 (m, 5H), 1.33 – 1.28 (m, 11H), 1.10 – 0.92 (m, 3H), 0.85 (s, 3H), 0.84 (s, 3H), 0.71 (td,  $J = 11.4, 3.8$  Hz, 1H).  $^{13}\text{C NMR}$  (126 MHz,  $\text{CDCl}_3$ )  $\delta$  221.36, 173.43, 142.85, 139.66, 73.32, 54.38, 51.43, 47.87, 44.73, 36.79, 35.94, 35.74, 35.11, 34.74, 34.08, 31.60, 30.89, 29.13, 29.09, 29.08, 28.52, 28.37, 27.77, 27.54, 25.06, 21.86, 20.55, 13.91, 12.31. **HRMS** Calcd for  $\text{C}_{30}\text{H}_{47}\text{NNaO}_5$  [ $\text{M}+\text{Na}^+$ ]: 524.3346; Found: 524.3350.

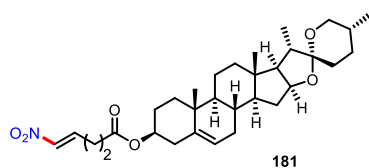

Compound **181** was isolated in 62% yield following the general conditions D.  $^1\text{H NMR}$  (500 MHz,  $\text{CDCl}_3$ )  $\delta$  7.27 – 7.21 (m, 1H), 7.00 (d,  $J = 13.5$  Hz, 1H), 5.36 (d,  $J = 4.3$  Hz, 1H), 4.64 – 4.57 (m, 1H), 4.41 – 4.36 (m, 1H), 3.47 – 3.42 (m, 1H), 3.35 (t,  $J = 10.9$  Hz, 1H), 2.61 – 2.53 (m, 2H), 2.49 (t,  $J = 7.0$  Hz, 2H), 2.29 (d,  $J = 7.7$  Hz, 2H), 2.00 – 1.93 (m, 2H), 1.86 – 1.81 (m, 3H), 1.77 – 1.70 (m, 2H), 1.66 – 1.49 (m, 6H), 1.46 – 1.38 (m, 2H), 1.30 – 1.21 (m, 3H), 1.20 – 1.04 (m, 4H), 1.01 (s, 3H), 0.95 (d,  $J = 7.0$  Hz, 3H), 0.78 – 0.75 (m, 6H).  $^{13}\text{C NMR}$  (126 MHz,  $\text{CDCl}_3$ )  $\delta$  170.94, 140.45, 140.40, 139.45, 122.71, 109.32, 80.85, 74.70, 66.90, 62.17, 56.50, 49.99, 41.68, 40.33,

39.78, 38.13, 36.97, 36.79, 32.37, 32.11, 31.91, 31.47, 30.37, 29.78, 28.89, 27.81, 23.78, 20.89, 19.39, 17.23, 16.36, 14.61. **HRMS** Calcd for  $C_{32}H_{47}NNaO_6$  [ $M+Na^+$ ]: 564.3296; Found: 564.3294.

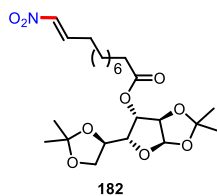

Compound **182** was isolated in 61% yield following the general conditions D.  **$^1H$  NMR** (500 MHz,  $CDCl_3$ )  $\delta$  7.30 – 7.23 (m, 1H), 6.97 (d,  $J = 13.4$  Hz, 1H), 5.86 (d,  $J = 3.6$  Hz, 1H), 5.28 – 5.25 (m, 1H), 4.47 (d,  $J = 3.7$  Hz, 1H), 4.20 (t,  $J = 3.4$  Hz, 2H), 4.09 – 4.06 (m, 1H), 4.03 – 3.99 (m, 1H), 2.34 (td,  $J = 7.5, 3.3$  Hz, 2H), 2.29 – 2.22 (m, 2H), 1.66 – 1.58 (m, 4H), 1.51 (s, 3H), 1.51 – 1.47 (m, 2H), 1.40 (s, 3H), 1.31 – 1.29 (m, 12H).  **$^{13}C$  NMR** (126 MHz,  $CDCl_3$ )  $\delta$  172.42, 142.78, 139.74, 112.44, 109.44, 105.19, 83.53, 80.00, 76.01, 72.58, 67.42, 34.33, 29.19, 29.16, 29.09, 28.55, 27.83, 26.95, 26.88, 26.35, 25.43, 24.93. **HRMS** Calcd for  $C_{23}H_{37}NNaO_9$  [ $M+Na^+$ ]: 494.2361; Found: 494.2367.

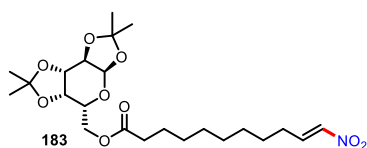

Compound **183** was isolated in 64% yield following the general conditions D.  **$^1H$  NMR** (500 MHz,  $CDCl_3$ )  $\delta$  7.27 – 7.19 (m, 1H), 6.95 (d,  $J = 13.4$  Hz, 1H), 5.50 (d,  $J = 4.9$  Hz, 1H), 4.58 (dd,  $J = 7.9, 2.1$  Hz, 1H), 4.32 – 4.24 (m, 2H), 4.20 (d,  $J = 7.9$  Hz, 1H), 4.16 – 4.09 (m, 1H), 4.01 – 3.95 (m, 1H), 2.30 (t,  $J = 7.5$  Hz, 2H), 2.23 (q,  $J = 7.3$  Hz, 2H), 1.63 – 1.53 (m, 2H), 1.52 – 1.43 (m, 5H), 1.41 (s, 3H), 1.33 – 1.21 (m, 14H).  **$^{13}C$  NMR** (126 MHz,  $CDCl_3$ )  $\delta$  173.70, 142.78, 139.63, 109.65, 108.76, 96.34, 71.13, 70.73, 70.49, 66.07, 63.31, 34.17, 29.10, 29.06, 29.00, 28.46, 27.74, 26.05, 26.00, 25.01, 24.92, 24.52. **HRMS** Calcd for  $C_{23}H_{37}NNaO_9$  [ $M+Na^+$ ]: 494.2361; Found: 494.2357.

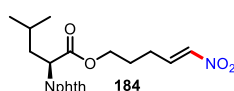

Compound **184** was isolated in 80% yield following the general conditions D.  **$^1H$  NMR** (500 MHz,  $CDCl_3$ )  $\delta$  7.84 – 7.81 (m, 2H), 7.73 – 7.71 (m, 2H), 7.21 – 7.09 (m, 1H),

6.90 (d,  $J = 13.4$  Hz, 1H), 4.90 (dd,  $J = 11.5, 4.2$  Hz, 1H), 4.22 – 4.16 (m, 1H), 4.14 – 4.08 (m, 1H), 2.31 – 2.21 (m, 3H), 1.94 – 1.87 (m, 1H), 1.82 – 1.75 (m, 2H), 1.48 – 1.42 (m, 1H), 0.91 (d,  $J = 6.5$  Hz, 3H), 0.88 (d,  $J = 6.6$  Hz, 3H).  $^{13}\text{C}$  NMR (126 MHz,  $\text{CDCl}_3$ )  $\delta$  169.71, 167.76, 140.98, 140.17, 134.41, 131.74, 123.58, 64.32, 50.66, 37.34, 26.83, 25.06, 24.92, 23.20, 21.03. **HRMS** Calcd for  $\text{C}_{19}\text{H}_{22}\text{N}_2\text{NaO}_6$  [ $\text{M}+\text{Na}^+$ ]: 397.1370; Found: 397.1373.

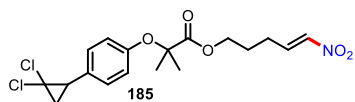

Compound **185** was isolated in 90% yield following the general conditions D.  $^1\text{H}$  NMR (500 MHz,  $\text{CDCl}_3$ )  $\delta$  7.16 – 7.07 (m, 3H), 6.82 (d,  $J = 13.4$  Hz, 1H), 6.78 (d,  $J = 8.7$  Hz, 2H), 4.17 (t,  $J = 6.1$  Hz, 2H), 2.82 (dd,  $J = 10.6, 8.5$  Hz, 1H), 2.16 – 2.06 (m, 2H), 1.99 – 1.89 (m, 1H), 1.83 – 1.74 (m, 3H), 1.62 (s, 6H).  $^{13}\text{C}$  NMR (126 MHz,  $\text{CDCl}_3$ )  $\delta$  174.26, 155.15, 140.98, 140.16, 129.85, 128.22, 117.99, 79.14, 64.06, 61.01, 34.86, 26.76, 25.92, 25.57, 25.53, 24.95. **HRMS** Calcd for  $\text{C}_{18}\text{H}_{21}\text{Cl}_2\text{NNaO}_5$  [ $\text{M}+\text{Na}^+$ ]: 424.0689; Found: 424.0689.

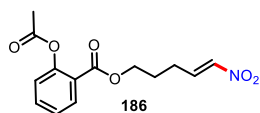

Compound **186** was isolated in 90% yield following the general conditions D.  $^1\text{H}$  NMR (500 MHz,  $\text{CDCl}_3$ )  $\delta$  7.96 (d,  $J = 7.8$  Hz, 1H), 7.56 (t,  $J = 7.7$  Hz, 1H), 7.34 – 7.22 (m, 2H), 7.10 (d,  $J = 8.0$  Hz, 1H), 7.01 (d,  $J = 13.4$  Hz, 1H), 4.30 (t,  $J = 6.2$  Hz, 2H), 2.39 (q,  $J = 7.3$  Hz, 2H), 2.33 (s, 3H), 1.99 – 1.88 (m, 2H).  $^{13}\text{C}$  NMR (126 MHz,  $\text{CDCl}_3$ )  $\delta$  169.65, 164.23, 150.75, 141.17, 140.15, 134.11, 131.49, 126.08, 123.86, 123.01, 63.70, 26.95, 25.13, 21.03. **HRMS** Calcd for  $\text{C}_{14}\text{H}_{15}\text{NNaO}_6$  [ $\text{M}+\text{Na}^+$ ]: 316.0792; Found: 316.0789.

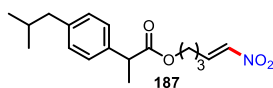

Compound **187** was isolated in 88% yield following the general conditions D.  $^1\text{H}$  NMR (500 MHz,  $\text{CDCl}_3$ )  $\delta$  7.19 (d,  $J = 8.0$  Hz, 2H), 7.17 – 7.12 (m, 1H), 7.10 (d,  $J = 7.9$  Hz, 2H), 6.81 (d,  $J = 13.4$  Hz, 1H), 4.17 – 4.09 (m, 1H), 4.09 – 4.02 (m, 1H), 3.69 (q,  $J = 7.1$  Hz, 1H), 2.45 (d,  $J = 7.2$  Hz, 2H), 2.15 (q,  $J = 7.4$  Hz, 2H), 1.90 – 1.72 (m, 3H),



1.48 (d,  $J = 7.2$  Hz, 3H), 0.88 (d,  $J = 6.6$  Hz, 6H).  $^{13}\text{C}$  NMR (126 MHz,  $\text{CDCl}_3$ )  $\delta$  174.63, 141.19, 140.82, 140.07, 137.75, 129.48, 127.18, 63.13, 45.20, 45.06, 30.26, 26.88, 24.94, 22.42, 18.24. **HRMS** Calcd for  $\text{C}_{18}\text{H}_{25}\text{NNaO}_4$  [ $\text{M}+\text{Na}^+$ ]: 342.1676; Found: 342.1674.

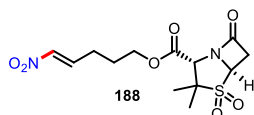

Compound **188** was isolated in 74% yield following the general conditions D.  $^1\text{H}$  NMR (500 MHz,  $\text{CDCl}_3$ )  $\delta$  7.29 – 7.18 (m, 1H), 7.00 (d,  $J = 13.4$  Hz, 1H), 4.61 (d,  $J = 2.6$  Hz, 1H), 4.35 (s, 1H), 4.30 – 4.13 (m, 2H), 3.49 (dd,  $J = 16.3, 4.0$  Hz, 1H), 3.40 (d,  $J = 16.3$  Hz, 1H), 2.36 (q,  $J = 7.1$  Hz, 2H), 1.97 – 1.85 (m, 2H), 1.56 (s, 3H), 1.37 (s, 3H).  $^{13}\text{C}$  NMR (126 MHz,  $\text{CDCl}_3$ )  $\delta$  171.03, 166.92, 140.73, 140.27, 65.22, 63.20, 62.71, 61.16, 38.36, 26.69, 25.08, 20.28, 18.57. **HRMS** Calcd for  $\text{C}_{13}\text{H}_{18}\text{N}_2\text{NaO}_7\text{S}$  [ $\text{M}+\text{Na}^+$ ]: 369.0727; Found: 369.0726.

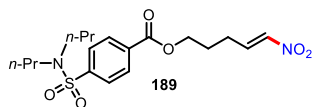

Compound **189** was isolated in 70% yield following the general conditions D.  $^1\text{H}$  NMR (500 MHz,  $\text{CDCl}_3$ )  $\delta$  8.13 (d,  $J = 8.4$  Hz, 2H), 7.87 (d,  $J = 8.3$  Hz, 2H), 7.35 – 7.27 (m, 1H), 7.03 (d,  $J = 13.4$  Hz, 1H), 4.41 (t,  $J = 6.2$  Hz, 2H), 3.17 – 3.00 (m, 4H), 2.54 – 2.38 (m, 2H), 2.11 – 1.96 (m, 2H), 1.58 – 1.49 (m, 4H), 0.86 (t,  $J = 7.4$  Hz, 6H).  $^{13}\text{C}$  NMR (126 MHz,  $\text{CDCl}_3$ )  $\delta$  165.19, 144.62, 141.10, 140.23, 133.22, 130.30, 127.19, 64.42, 50.05, 27.11, 25.44, 22.04, 11.26. **HRMS** Calcd for  $\text{C}_{18}\text{H}_{26}\text{KN}_2\text{O}_6\text{S}$  [ $\text{M}+\text{K}^+$ ]: 437.1143; Found: 437.1134.

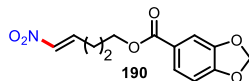

Compound **190** was isolated in 70% yield following the general conditions D.  $^1\text{H}$  NMR (500 MHz,  $\text{CDCl}_3$ )  $\delta$  7.60 (d,  $J = 8.2$  Hz, 1H), 7.40 (s, 1H), 7.35 – 7.24 (m, 1H), 7.01 (dd,  $J = 13.4, 0.9$  Hz, 1H), 6.81 (dd,  $J = 8.2, 1.4$  Hz, 1H), 6.01 (s, 2H), 4.31 (t,  $J = 6.0$  Hz, 2H), 2.42 (q,  $J = 7.4$  Hz, 2H), 2.09 – 1.86 (m, 2H).  $^{13}\text{C}$  NMR (126 MHz,  $\text{CDCl}_3$ )  $\delta$  165.70, 151.76, 147.77, 141.43, 139.99, 125.31, 123.80, 109.33, 107.99, 101.90, 63.59, 27.03, 25.36. **HRMS** Calcd for  $\text{C}_{13}\text{H}_{13}\text{NNaO}_6$  [ $\text{M}+\text{Na}^+$ ]: 302.0635; Found: 302.0629.

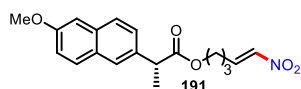

Compound **191** was isolated in 71% yield following the general conditions D.  $^1\text{H NMR}$  (500 MHz,  $\text{CDCl}_3$ )  $\delta$  7.71 (dd,  $J = 8.6, 3.9$  Hz, 2H), 7.66 (s, 1H), 7.39 (d,  $J = 8.5$  Hz, 1H), 7.18 – 7.06 (m, 3H), 6.70 (d,  $J = 13.4$  Hz, 1H), 4.15 – 4.10 (m, 1H), 4.09 – 4.04 (m, 1H), 3.91 (s, 3H), 3.85 (q,  $J = 7.1$  Hz, 1H), 2.12 – 2.04 (m, 2H), 1.79 – 1.68 (m, 2H), 1.58 (d,  $J = 7.2$  Hz, 3H).  $^{13}\text{C NMR}$  (126 MHz,  $\text{CDCl}_3$ )  $\delta$  174.50, 157.74, 141.20, 139.86, 135.56, 133.72, 129.22, 128.87, 127.25, 126.07, 125.95, 119.20, 105.56, 63.26, 55.31, 45.42, 26.78, 24.91, 18.23. **HRMS** Calcd for  $\text{C}_{19}\text{H}_{21}\text{NNaO}_5$  [ $\text{M}+\text{Na}^+$ ]: 366.1312; Found: 366.1311.

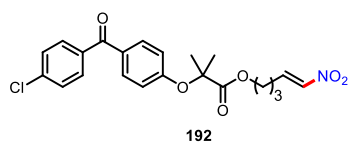

Compound **192** was isolated in 82% yield following the general conditions D.  $^1\text{H NMR}$  (500 MHz,  $\text{CDCl}_3$ )  $\delta$  7.73 (d,  $J = 8.7$  Hz, 2H), 7.68 (d,  $J = 8.4$  Hz, 2H), 7.43 (d,  $J = 8.4$  Hz, 2H), 7.17 – 7.07 (m, 1H), 6.86 – 6.82 (m, 3H), 4.18 (t,  $J = 6.1$  Hz, 2H), 2.15 (q,  $J = 7.4$  Hz, 2H), 1.83 – 1.77 (m, 2H), 1.67 (s, 6H).  $^{13}\text{C NMR}$  (126 MHz,  $\text{CDCl}_3$ )  $\delta$  194.13, 173.68, 159.67, 140.81, 140.12, 138.51, 136.30, 132.15, 131.21, 130.52, 128.64, 117.05, 79.43, 64.35, 26.71, 25.50, 24.96. **HRMS** Calcd for  $\text{C}_{22}\text{H}_{22}\text{ClNNaO}_6$  [ $\text{M}+\text{Na}^+$ ]: 454.1028; Found: 454.1028.

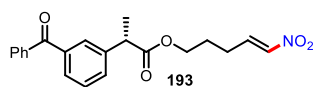

Compound **193** was isolated in 72% yield following the general conditions D.  $^1\text{H NMR}$  (500 MHz,  $\text{CDCl}_3$ )  $\delta$  7.81 – 7.73 (m, 3H), 7.65 (d,  $J = 7.6$  Hz, 1H), 7.58 (t,  $J = 7.4$  Hz, 1H), 7.52 (d,  $J = 7.5$  Hz, 1H), 7.50 – 7.40 (m, 3H), 7.21 – 7.11 (m, 1H), 6.88 (d,  $J = 13.4$  Hz, 1H), 4.10 (t,  $J = 5.8$  Hz, 2H), 3.80 (q,  $J = 7.1$  Hz, 1H), 2.22 (q,  $J = 7.4$  Hz, 2H), 1.89 – 1.70 (m, 2H), 1.53 (d,  $J = 7.2$  Hz, 3H).  $^{13}\text{C NMR}$  (126 MHz,  $\text{CDCl}_3$ )  $\delta$  196.43, 173.90, 141.10, 140.84, 140.07, 138.02, 137.43, 132.64, 131.47, 130.07, 129.19, 129.07, 128.62, 128.39, 63.55, 45.41, 26.83, 25.02, 18.33. **HRMS** Calcd for  $\text{C}_{21}\text{H}_{21}\text{NNaO}_5$  [ $\text{M}+\text{Na}^+$ ]: 390.1312; Found: 390.1311.

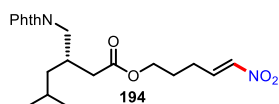

Compound **194** was isolated in 48% yield following the general conditions D.  $^1\text{H NMR}$  (500 MHz,  $\text{CDCl}_3$ )  $\delta$  7.85 – 7.79 (m, 2H), 7.73 – 7.68 (m, 2H), 7.28 – 7.19 (m, 1H), 7.02 (d,  $J = 13.4$  Hz, 1H), 4.00 (t,  $J = 6.0$  Hz, 2H), 3.69 (dd,  $J = 13.7, 4.9$  Hz, 1H), 3.61 (dd,  $J = 13.7, 8.1$  Hz, 1H), 2.47 – 2.41 (m, 1H), 2.37 – 2.28 (m, 3H), 1.85 – 1.76 (m, 2H), 1.72 (dd,  $J = 13.2, 6.6$  Hz, 1H), 1.27 – 1.14 (m, 3H), 0.94 (d,  $J = 6.5$  Hz, 3H), 0.88 (d,  $J = 6.5$  Hz, 3H).  $^{13}\text{C NMR}$  (126 MHz,  $\text{CDCl}_3$ )  $\delta$  172.42, 168.70, 141.36, 140.16, 134.11, 132.05, 123.31, 63.07, 41.96, 41.83, 37.54, 32.73, 26.95, 25.36, 25.22, 22.70, 22.67. **HRMS** Calcd for  $\text{C}_{21}\text{H}_{26}\text{N}_2\text{NaO}_6$  [ $\text{M}+\text{Na}^+$ ]: 425.1683; Found: 425.1684.

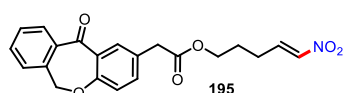

Compound **195** was isolated in 69% yield following the general conditions D.  $^1\text{H NMR}$  (500 MHz,  $\text{CDCl}_3$ )  $\delta$  8.13 (d,  $J = 2.3$  Hz, 1H), 7.90 – 7.82 (m, 1H), 7.56 (td,  $J = 7.4, 1.3$  Hz, 1H), 7.47 (td,  $J = 7.6, 1.2$  Hz, 1H), 7.43 – 7.39 (m, 1H), 7.36 (d,  $J = 7.4$  Hz, 1H), 7.27 – 7.19 (m, 1H), 7.03 (d,  $J = 8.4$  Hz, 1H), 6.97 (d,  $J = 13.4$  Hz, 1H), 5.19 (s, 2H), 4.15 (t,  $J = 6.2$  Hz, 2H), 3.64 (s, 2H), 2.33 (qd,  $J = 7.5, 1.5$  Hz, 2H), 1.96 – 1.79 (m, 2H).  $^{13}\text{C NMR}$  (126 MHz,  $\text{CDCl}_3$ )  $\delta$  190.94, 171.39, 140.56, 137.47, 136.41, 135.71, 132.97, 132.56, 132.30, 129.64, 129.44, 127.99, 127.82, 125.36, 121.29, 118.06, 73.82, 63.62, 40.40, 27.17, 26.50. **HRMS** Calcd for  $\text{C}_{21}\text{H}_{19}\text{NNaO}_6$  [ $\text{M}+\text{Na}^+$ ]: 404.1105; Found: 404.1105.

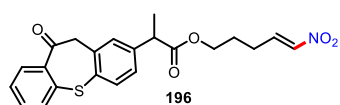

Compound **196** was isolated in 76% yield following the general conditions D.  $^1\text{H NMR}$  (500 MHz,  $\text{CDCl}_3$ )  $\delta$  8.17 (d,  $J = 7.9$  Hz, 1H), 7.60 (t,  $J = 8.5$  Hz, 2H), 7.42 (t,  $J = 7.5$  Hz, 1H), 7.37 (s, 1H), 7.31 (t,  $J = 7.5$  Hz, 1H), 7.18 – 7.08 (m, 2H), 6.82 (d,  $J = 13.4$  Hz, 1H), 4.35 (s, 2H), 4.15 – 4.01 (m, 2H), 3.71 (q,  $J = 7.1$  Hz, 1H), 2.13 (q,  $J = 7.5$  Hz, 2H), 1.81 – 1.71 (m, 2H), 1.48 (d,  $J = 7.2$  Hz, 3H).  $^{13}\text{C NMR}$  (126 MHz,  $\text{CDCl}_3$ )  $\delta$  191.36, 173.79, 142.62, 141.19, 140.19, 139.98, 138.11, 136.05, 133.49, 132.71, 131.68, 131.54, 130.94, 128.61, 126.99, 126.30, 63.62, 51.04, 45.21, 26.78, 25.05, 18.27. **HRMS** Calcd for  $\text{C}_{22}\text{H}_{21}\text{NNaO}_5\text{S}$  [ $\text{M}+\text{Na}^+$ ]: 434.1033; Found: 434.1033.

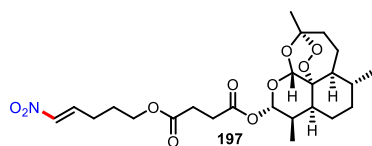

Compound **197** was isolated in 64% yield following the general conditions D. **<sup>1</sup>H NMR** (500 MHz, CDCl<sub>3</sub>) δ 7.31 – 7.21 (m, 1H), 7.03 (d, *J* = 13.4 Hz, 1H), 5.77 (d, *J* = 9.8 Hz, 1H), 5.43 (s, 1H), 4.21 – 4.14 (m, 1H), 4.14 – 4.07 (m, 1H), 2.72 (t, *J* = 6.6 Hz, 2H), 2.67 – 2.56 (m, 2H), 2.40 – 2.31 (m, 2H), 2.03 (m, 2H), 1.92 – 1.81 (m, 3H), 1.80 – 1.65 (m, 3H), 1.61 (dt, *J* = 13.7, 4.2 Hz, 1H), 1.52 – 1.44 (m, 1H), 1.41 (s, 3H), 1.37 – 1.22 (m, 4H), 0.95 (d, *J* = 6.0 Hz, 3H), 0.84 (d, *J* = 7.1 Hz, 3H). **<sup>13</sup>C NMR** (126 MHz, CDCl<sub>3</sub>) δ 172.11, 171.28, 141.32, 140.29, 104.58, 92.37, 91.62, 80.24, 63.39, 51.68, 45.34, 37.37, 36.32, 34.19, 31.91, 29.29, 28.98, 27.00, 26.04, 25.17, 24.68, 22.09, 20.33, 12.16. **HRMS** Calcd for C<sub>24</sub>H<sub>35</sub>NNaO<sub>10</sub> [M+Na<sup>+</sup>]: 520.2153; Found: 520.2156.

## 8. Synthetic applications

### 8.1 Gram-scale continuous flow dichlorination reaction of epiandrosterone

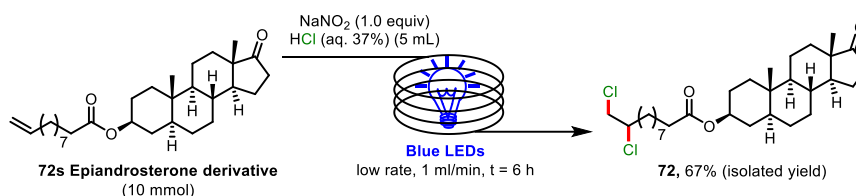

**Scheme S22.** Gram-scale continuous flow dichlorination reaction of epiandrosterone

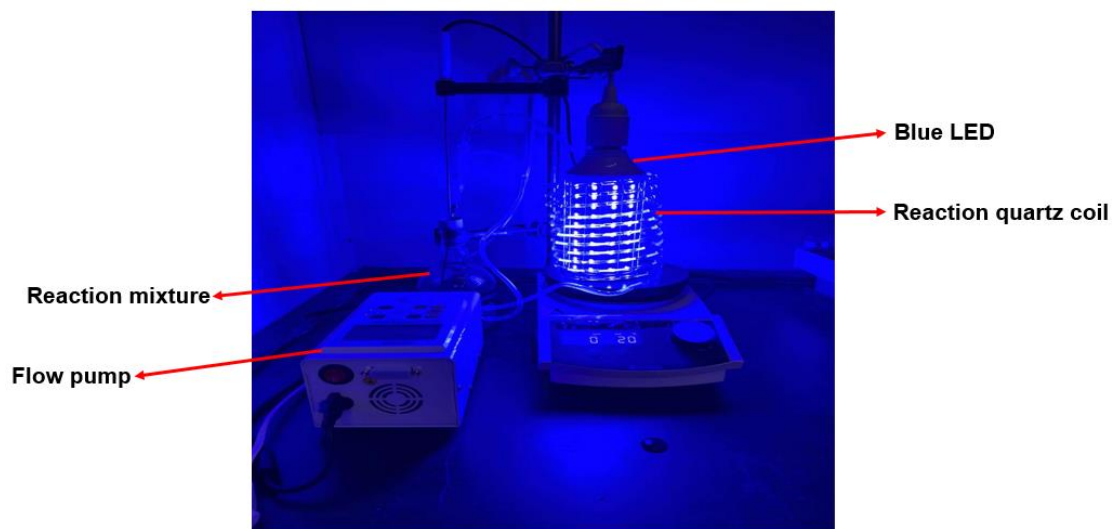

**Figure S1.** Gram-scale continuous flow dichlorination reaction of epiandrosterone

Substrate Epiandrosterone derivative **72s** (10.0 mmol, 1.0 equiv) and  $\text{NaNO}_2$  (10.0 mmol, 1.0 equiv) were dispersed in  $\text{CH}_2\text{Cl}_2$  (100.0 mL) in a 250 mL round bottom flask. Then HCl (5 mL, aq. 37% in water) was added at 0 °C. As shown in Figure S1, a flow pump was employed to pump the reaction mixture, and then attached to the flow apparatus was placed into a platform equipped with a 24 W blue LEDs and quartz reaction coil (The reaction coil is made of quartz, O.D. = 2 mm, I.D. = 1 mm). The flow apparatus itself was set up with flow rate = 1 mL/min. The flow reaction mixture irradiated with blue LEDs at room temperature (30 °C) for 6 h until the reaction was complete (monitored by TLC). The reaction mixture was concentrated under reduced pressure, and then the resulting crude product was purified by column chromatography (eluent: *n*-hexane/AcOEt) to provide the dichlorination product **72** in 67% isolated yield (3.50 g).

## 8.2 Gram-scale continuous flow dibromination reaction of epiandrosterone

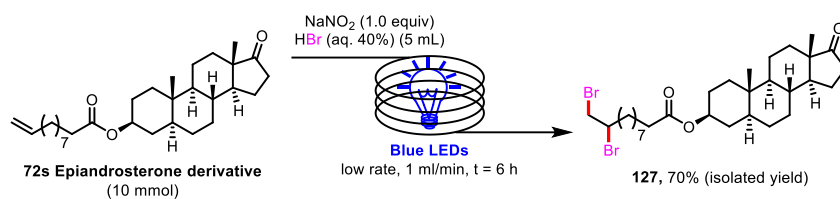

**Scheme S23.** Gram-scale continuous flow dibromination reaction of epiandrosterone

Substrate Epiandrosterone derivative **72s** (10.0 mmol, 1.0 equiv) and NaNO<sub>2</sub> (10.0 mmol, 1.0 equiv) were dispersed in CH<sub>2</sub>Cl<sub>2</sub> (100.0 mL) in a 250 mL round bottom flask. Then HBr (5 mL, aq. 40% in water) was added at 0 °C. As shown in Figure S1, a flow pump was employed to pump the reaction mixture, and then attached to the flow apparatus was placed into a platform equipped with a 24 W blue LEDs and quartz reaction coil (The reaction coil is made of quartz, O.D. = 2 mm, I.D. = 1 mm). The flow apparatus itself was set up with flow rate = 1 mL/min. The flow reaction mixture irradiated with blue LEDs at room temperature (30 °C) for 6 h until the reaction was complete (monitored by TLC). The reaction mixture was concentrated under reduced pressure, and then the resulting crude product was purified by column chromatography (eluent: *n*-hexane/AcOEt) to provide the dibromination product **127** in 70% isolated yield (4.27 g).

### 8.3 Gram-scale nitration of pregnenolone

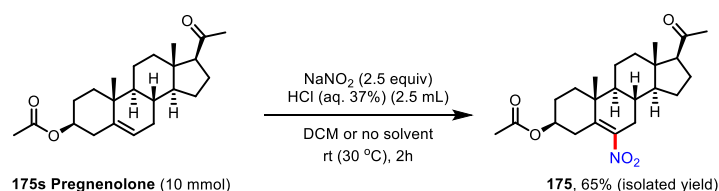

**Scheme S24.** Gram-scale nitration of pregnenolone

Substrate pregnenolone **175s** (10 mmol, 1.0 equiv) and NaNO<sub>2</sub> (25 mmol, 2.5 equiv) were dispersed in CH<sub>2</sub>Cl<sub>2</sub> (100.0 mL) in a 250 mL round bottom flask. Then HCl (2.5

mL, aq. 37% in water) was added at 0 °C. The reaction mixture vigorously stirred at room temperature (30 °C) for 2 h. Then, the reaction mixture was extracted with CH<sub>2</sub>Cl<sub>2</sub> (3 × 100 mL). The combined organic layer was dried over anhydrous Na<sub>2</sub>SO<sub>4</sub>, filtered and concentrated. The residue was purified by chromatography on silica gel to afford the desired nitration product in 65% isolated yield (2.62 g).

Note: The gram-scale nitration reaction of pregnenolone **175s** can be carried out without solvent DCM to give the desired nitration product in 63% isolated yield (2.54 g).

#### 8.4 Synthetic applications of olefin nitration reaction in the synthesis of anti-cancer agent Alimta

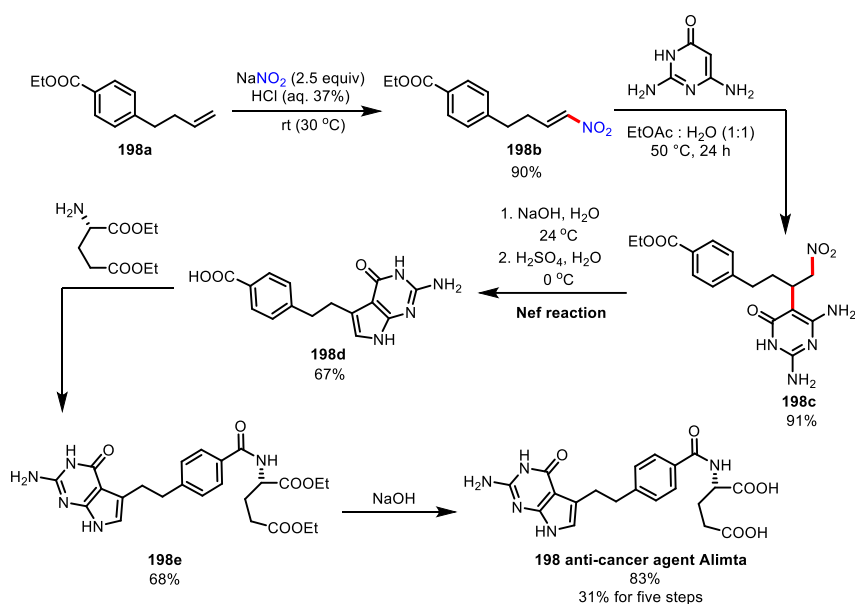

**Scheme S25.** Synthetic applications of olefin nitration reaction in the synthesis of anti-cancer agent Alimta

4-(Nitrobut-3-enyl)benzene (**198b**): Substrate alkene **198a** (1.0 mmol, 1.0 equiv), NaNO<sub>2</sub> (2.5 mmol, 2.5 equiv) and HCl (250  $\mu$ L, aq. 37% in water) were dispersed in CH<sub>2</sub>Cl<sub>2</sub> (20.0 mL) in a 100 mL round bottom flask. The reaction mixture vigorously stirred at 30 °C for 2 h. Then, the reaction mixture was extracted with CH<sub>2</sub>Cl<sub>2</sub> (3 × 20

mL). The combined organic layer was dried over anhydrous Na<sub>2</sub>SO<sub>4</sub>, filtered and concentrated. The residue was purified by chromatography on silica gel to afford the desired nitration product **198b** 224.2 mg (90%).

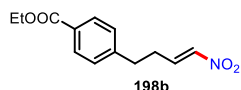

<sup>1</sup>H NMR (500 MHz, CDCl<sub>3</sub>) δ 7.99 (d, *J* = 7.9 Hz, 2H), 7.32 – 7.14 (m, 3H), 6.95 (d, *J* = 13.4 Hz, 1H), 4.37 (q, *J* = 7.0 Hz, 2H), 2.89 (t, *J* = 7.5 Hz, 2H), 2.61 (q, *J* = 7.4 Hz, 2H), 1.39 (t, *J* = 7.1 Hz, 3H).<sup>41, 42</sup>

4-[3-(2,4-Diamino-6-oxo-1,6-dihydropyrimidin-5-yl)-4-nitrobutyl]benzoic acid ethyl ester (**198c**): The mixture of (0.57 mmol, 1.0 equiv) of **198b** and (0.57 mmol, 1.0 equiv) of 2,6-diamino-3*H*-pyrimidin-4-one in 2 mL of water and 2 mL of ethyl acetate was stirred at 50 °C for 24 h. The solid slowly disappeared. The reaction mixture was poured into 10 mL of ethyl acetate, washed with water (2 × 4 mL), dried with Na<sub>2</sub>SO<sub>4</sub>, and then concentrated. The residue was purified by column chromatography (silica gel/ethyl acetate:methanol ) 8:1) to afford product **198c** 195 mg (91%).

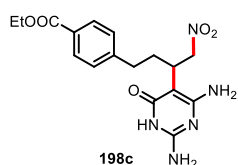

<sup>1</sup>H NMR (500 MHz, DMSO) δ 10.59 (br, 1H), 7.82 (d, *J* = 7.6 Hz, 2H), 7.25 (d, *J* = 7.8 Hz, 2H), 6.50 (br, 2H), 5.87 (br, 2H), 5.06 – 4.92 (m, 1H), 4.76 (dd, *J* = 11.7, 6.2 Hz, 1H), 4.27 (q, *J* = 6.9 Hz, 2H), 3.39 (m, 1H), 2.70 – 2.58 (m, 1H), 2.57 – 2.50 (m, 1H), 2.23 – 2.06 (m, 1H), 1.73 – 1.64 (m, 1H), 1.28 (t, *J* = 7.0 Hz, 3H).<sup>41, 42</sup>

4-[2-(2-Amino-4-oxo-4,7-dihydro-3*H*-pyrrolo[2,3-*d*]pyrimidin-5-yl)ethyl]benzoic acid (**198d**): To a mixture of (6.0 mmol, 6.0 equiv) of NaOH in 3.0 mL of water was added (1.0 mmol, 1.0 equiv) of **198c** at room temperature. The mixture was stirred at room temperature for 2 h and then was slowly added to (10.0 mmol, 10.0 equiv) of



H<sub>2</sub>SO<sub>4</sub> in 4.0 mL of water at 0 °C. After 3 h, aqueous sodium hydroxide (2.0 N) was added to adjust the pH to 7. The mixture was stirred at room temperature for another 1 h. Acetic acid (0.5 mL) was added and the precipitated solid was collected by filtration, washed with water followed by ethyl acetate, and dried under vacuum to give 0.20 g (67%) of product as a light green solid that is used without further purification for the next reaction.

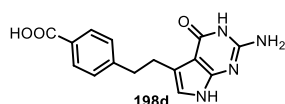

<sup>1</sup>H NMR (500 MHz, DMSO) δ 10.61 (s, 1H), 10.16 (s, 1H), 7.82 (d, *J* = 7.5 Hz, 2H), 7.30 (d, *J* = 7.8 Hz, 2H), 6.30 (s, 1H), 6.01 (s, 2H), 3.00 – 2.93 (m, 2H), 2.87 – 2.80 (m, 2H).<sup>41, 42</sup>

***N*-{4-(2-Amino-4-oxo-4,7-dihydro-3*H*-pyrrolo[2,3-*d*]pyrimidin-5-**

**yl)ethyl]benzoyl}-L-glutamic acid diethyl ester (198e):** To a suspension of 185 mg (0.5 mmol, 1.0 equiv) of **198d** in 15 mL of dry DMF were added (0.6 mmol, 1.2 equiv) of 4-methylmorpholine and 130 mg (0.6 mmol, 1.2 equiv) of 2-chloro-4,6-dimethoxy-1,3,5-triazine. The resulting mixture was stirred at room temperature for 2 h, and 0.08 mL of 4-methylmorpholine and 221 mg (0.75 mmol, 1.5 equiv) of diethyl L-glutamate hydrochloride were added. The reaction mixture was stirred for another 4 h at room temperature. Solvent was evaporated under vacuum and the residue was purified by column chromatography (silica gel/ CH<sub>2</sub>Cl<sub>2</sub>:MeOH ) 9:1) to give 164 mg (68%) of product as an off-white solid.

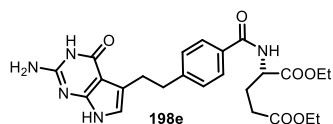

<sup>1</sup>H NMR (500 MHz, DMSO) δ 10.98 (s, 1H), 10.56 (s, 1H), 8.64 (d, *J* = 7.0 Hz, 1H), 7.76 (d, *J* = 7.4 Hz, 2H), 7.28 (d, *J* = 7.8 Hz, 2H), 6.38 (s, 1H), 6.27 (s, 2H), 5.31 (s, 1H), 4.41 (s, 1H), 4.09 (q, *J* = 6.3 Hz, 2H), 4.03 (q, *J* = 6.8 Hz, 2H), 2.96 (t, *J* = 7.7 Hz,

2H), 2.83 (t,  $J = 7.4$  Hz, 2H), 2.42 (t,  $J = 6.6$  Hz, 2H), 2.11 – 2.05 (m, 1H), 1.99 – 1.96 (m, 1H), 1.20 – 1.11 (m, 6H).<sup>41, 42</sup>

***N*-{4-[2-(2-Amino-4-oxo-4,7-dihydro-3*H*-pyrrolo[2,3-*d*]pyrimidin-5-yl)ethyl]benzoyl}-L-glutamic acid (**Alimta**,**198**):** To a solution of 100 mg of **198e** in 3.0 mL of THF was added 1.0 mL of 1 N aqueous NaOH at room temperature. The resulting mixture was stirred for 4 h. Solvent was evaporated under reduced pressure and the mixture was acidified by addition of acetic acid. The precipitate was collected, washed with water ( $3 \times 10$  mL) and EtOAc ( $3 \times 10$  mL), and dried under vacuum to afford 73 mg (83%) of **198** as an off-white solid.

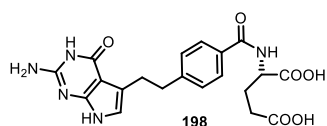

**<sup>1</sup>H NMR** (500 MHz, D<sub>2</sub>O)  $\delta$  8.45 (s, 1H), 7.69 (d,  $J = 8.0$  Hz, 2H), 7.30 (d,  $J = 7.9$  Hz, 2H), 6.35 (s, 1H), 4.36 – 4.27 (m, 1H), 3.00 (m, 4H), 2.31 (t,  $J = 7.8$  Hz, 2H), 2.21 – 2.13 (m, 1H), 2.06 – 1.98 (m, 1H). **<sup>13</sup>C NMR** (126 MHz, D<sub>2</sub>O)  $\delta$  182.33, 179.03, 171.09, 170.24, 168.30, 152.17, 147.15, 130.88, 128.88, 127.12, 116.99, 114.65, 99.93, 55.99, 35.74, 34.30, 28.44, 27.28.<sup>41, 42</sup>

## 9. Mechanistic studies

### 9.1 Mechanistic studies of dichlorination of olefins

**Radical scavenger experiment:** Compound **135s** was examined for the dichlorination reaction in order to prove that chlorine radical was produced under our dichlorination standard conditions.

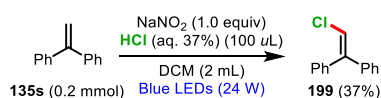

**Scheme S26.** Radical scavenger experiment

Radical scavenger 1,1-Diphenylethylene (0.2 mmol, 1.0 equiv), NaNO<sub>2</sub> (0.2 mmol, 1.0 equiv) and HCl (100  $\mu$ L, aq. 37% in water) were dispersed in CH<sub>2</sub>Cl<sub>2</sub> (2.0 mL) in a 4 mL glass vial at room temperature. The reaction vial was sealed with a PTEF cap and the reaction mixture vigorously stirred at 30 °C under the 24 W blue LEDs irradiation for 6 h. Then, the reaction mixture was extracted with CH<sub>2</sub>Cl<sub>2</sub> (3  $\times$  2 mL). The combined organic layer was dried over anhydrous Na<sub>2</sub>SO<sub>4</sub>, filtered and concentrated. The residue was purified by chromatography on silica gel to afford the 2-chloro-1,1-diphenylethylene 16 mg (37%).

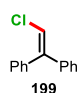

<sup>1</sup>H NMR (500 MHz, CDCl<sub>3</sub>)  $\delta$  7.44 – 7.39 (m, 2H), 7.37 – 7.30 (m, 6H), 7.24 – 7.20 (m, 2H), 6.60 (s, 1H).<sup>43</sup>

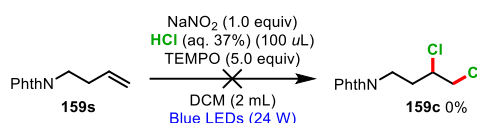

**Scheme S27.** Radical scavenger experiment

Alkene **159s** (0.2 mmol, 1.0 equiv), radical scavenger TEMPO (1.0 mmol, 5.0 equiv), NaNO<sub>2</sub> (0.2 mmol, 1.0 equiv) and HCl (100  $\mu$ L, aq. 37% in water) were dispersed in CH<sub>2</sub>Cl<sub>2</sub> (2.0 mL) in a 4 mL glass vial at room temperature. The reaction vial was sealed with a PTEF cap and the reaction mixture vigorously stirred at 30 °C under the 24 W blue LEDs irradiation for 6 h. Then, the reaction mixture was extracted with CH<sub>2</sub>Cl<sub>2</sub> (3  $\times$  2 mL). The combined organic layer was dried over anhydrous Na<sub>2</sub>SO<sub>4</sub>, filtered and concentrated. The dichlorination product **159c** was completely inhibited.

**Radical clock experiment:** Compounds **200s** and **201s** were examined for the dichlorination reaction in order to prove that chlorine radical was produced under our

dichlorination standard conditions and carbon radical intermediate was involved in this dichlorination process.

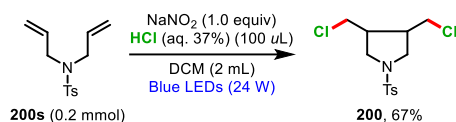

**Scheme S28.** Radical clock experiment of *N*-tosyldiallylamine

*N*-tosyldiallylamine (0.2 mmol, 1.0 equiv),  $\text{NaNO}_2$  (0.2 mmol, 1.0 equiv) and  $\text{HCl}$  (100  $\mu\text{L}$ , aq. 37% in water) were dispersed in  $\text{CH}_2\text{Cl}_2$  (2.0 mL) in a 4 mL glass vial at room temperature. The reaction vial was sealed with a PTEF cap and the reaction mixture vigorously stirred at 30 °C under the 24 W blue LEDs irradiation for 12 h. Then, the reaction mixture was extracted with  $\text{CH}_2\text{Cl}_2$  (3  $\times$  2 mL). The combined organic layer was dried over anhydrous  $\text{Na}_2\text{SO}_4$ , filtered and concentrated. The residue was purified by chromatography on silica gel to afford the cyclization-derived pyrrolidine 43 mg (67%).

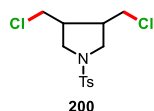

$^1\text{H NMR}$  (500 MHz,  $\text{CDCl}_3$ )  $\delta$  7.71 (t,  $J = 8.8$  Hz, 2H), 7.34 (d,  $J = 8.2$  Hz, 2H), 3.54 – 3.37 (m, 5H), 3.31 – 3.24 (m, 2H), 3.12 (dd,  $J = 10.3, 6.1$  Hz, 1H), 2.66 – 2.58 (m, 1H), 2.44 (s, 3H), 2.42 – 2.34 (m, 1H).<sup>17</sup>

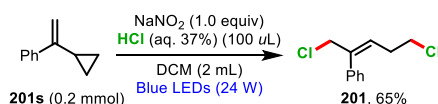

**Scheme S29.** Radical clock experiment of (1-cyclopropylvinyl)benzene

Cyclopropane-containing alkene (1-cyclopropylvinyl)benzene (0.2 mmol, 1.0 equiv),  $\text{NaNO}_2$  (0.2 mmol, 1.0 equiv) and  $\text{HCl}$  (100  $\mu\text{L}$ , aq. 37% in water) were dispersed in

CH<sub>2</sub>Cl<sub>2</sub> (2.0 mL) in a 4 mL glass vial at room temperature. The reaction vial was sealed with a PTEF cap and the reaction mixture vigorously stirred at 30 °C under the 24 W blue LEDs irradiation for 12 h. Then, the reaction mixture was extracted with CH<sub>2</sub>Cl<sub>2</sub> (3 × 2 mL). The combined organic layer was dried over anhydrous Na<sub>2</sub>SO<sub>4</sub>, filtered and concentrated. The residue was purified by chromatography on silica gel to afford the ring-opening product 28 mg (65%).

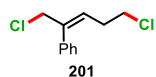

<sup>1</sup>H NMR (500 MHz, CDCl<sub>3</sub>) δ 7.46 (d, *J* = 7.6 Hz, 2H), 7.37 (t, *J* = 7.4 Hz, 2H), 7.34 – 7.28 (m, 1H), 6.01 (t, *J* = 7.4 Hz, 1H), 4.48 (s, 2H), 3.68 (t, *J* = 6.7 Hz, 2H), 2.81 (q, *J* = 6.9 Hz, 2H).<sup>44</sup>

#### Light/dark experiment of dichlorination of olefin **1**:

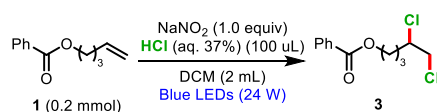

**Scheme S30.** Light/dark experiment of dichlorination of **1**

Six vials were equipped with a stir bar and charged with **1** (0.2 mmol, 1.0 equiv), NaNO<sub>2</sub> (0.2 mmol, 1.0 equiv) and HCl (100 μL, aq. 37% in water) were dispersed in CH<sub>2</sub>Cl<sub>2</sub> (2.0 mL) in a 4 mL glass vial at room temperature. The reaction vial was sealed with a PTEF cap and the reactions was alternatively irradiated with a Blue LEDs (24 W) and kept in the dark in 1 h intervals. After each interval, one vial was take out, the solvent was removed under reduced pressure, and the yield was determined by <sup>1</sup>H NMR based on a Cl<sub>2</sub>CHCHCl<sub>2</sub> as an internal standard. These results indicated that continuous irradiation with light was essential for promoting the reaction.

| Vial | Time (h)/condition |  |  |  |  |  | Yield (%) <sup>a</sup> |
|------|--------------------|--|--|--|--|--|------------------------|
| 1    | 0-1/hv             |  |  |  |  |  | 17                     |

|   |        |          |        |          |        |        |    |
|---|--------|----------|--------|----------|--------|--------|----|
| 2 | 0-1/hv | 1-2/dark |        |          |        |        | 21 |
| 3 | 0-1/hv | 1-2/dark | 2-3/hv |          |        |        | 30 |
| 4 | 0-1/hv | 1-2/dark | 2-3/hv | 3-4/dark |        |        | 40 |
| 5 | 0-1/hv | 1-2/dark | 2-3/hv | 3-4/dark | 4-5/hv |        | 44 |
| 6 | 0-1/hv | 1-2/dark | 2-3/hv | 3-4/dark | 4-5/hv | 5-6/hv | 56 |

a) NMR yield, average of three experiments.

**Table S2.** Yields of Light/Dark experiment.

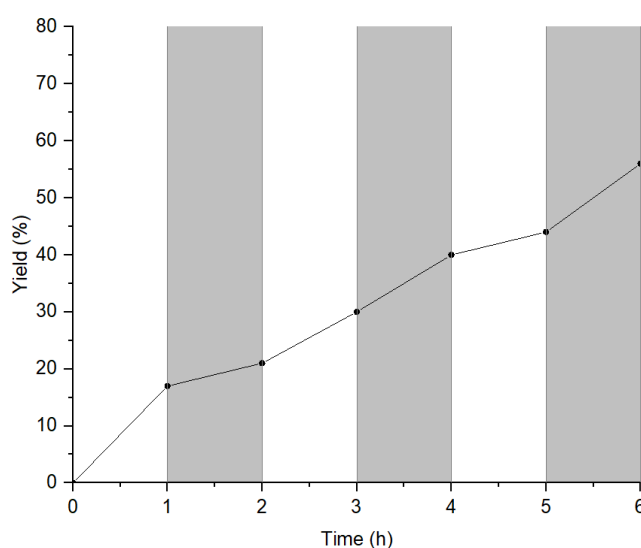

**Figure S2.** Light/dark experiment of dichlorination of **1**

**UV-vis experiment:** Ultraviolet–visible absorption experiments were performed using a Unicosh UV-4800 UV-visible spectrophotometer. Six samples were prepared, H<sub>2</sub>O (2.0 mL); H<sub>2</sub>O (2.0 mL) and mixtures of HCl (aq. 37% in water, 5 μL); H<sub>2</sub>O (2.0 mL) and mixtures of NaNO<sub>2</sub> (0.1 mmol); H<sub>2</sub>O (2.0 mL) and mixtures of NaNO<sub>2</sub> (0.1 mmol), HCl (aq. 37% in water, 5 μL); H<sub>2</sub>O (2.0 mL) and mixtures of NaNO<sub>2</sub> (0.1 mmol), HCl (aq. 37% in water, 10 μL) and H<sub>2</sub>O (2.0 mL) and mixtures of NaNO<sub>2</sub> (0.1 mmol), HCl (aq. 37% in water, 60 μL), a series of aliquots was transferred into the 2.0 mL quartz tube under an air atmosphere and measured directly.

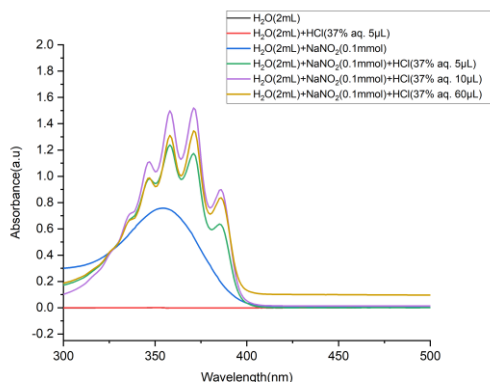

**Figure S3.** Ultraviolet–visible absorption spectrum

## 9.2 Mechanistic studies of dibromination of olefins

**Radical scavenger experiment:** Compound **135s** was examined for the dibromination reaction in order to prove that bromine radical was produced under our dibromination standard conditions.

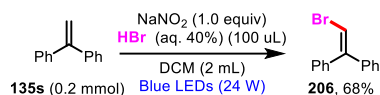

**Scheme S31.** Radical scavenger experiment

Radical scavenger 1,1-Diphenylethylene (0.2 mmol, 1.0 equiv), NaNO<sub>2</sub> (0.2 mmol, 1.0 equiv) and HBr (100  $\mu$ L, aq. 40% in water) were dispersed in CH<sub>2</sub>Cl<sub>2</sub> (2.0 mL) in a 4 mL glass vial at room temperature. The reaction vial was sealed with a PTEF cap and the reaction mixture vigorously stirred at 30 °C under the 24 W blue LEDs irradiation for 6 h. Then, the reaction mixture was extracted with CH<sub>2</sub>Cl<sub>2</sub> (3  $\times$  2 mL). The combined organic layer was dried over anhydrous Na<sub>2</sub>SO<sub>4</sub>, filtered and concentrated. The residue was purified by chromatography on silica gel to afford the 2-Bromo-1,1-diphenylethylene 35 mg (68%).

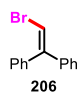

$^1\text{H NMR}$  (500 MHz,  $\text{CDCl}_3$ )  $\delta$  7.45 – 7.38 (m, 3H), 7.35 – 7.30 (m, 5H), 7.25 – 7.22 (m, 2H), 6.80 (s, 1H).<sup>45</sup>

**Radical clock experiment:** Compound **201s** was examined for the dibromination reaction in order to prove that bromine radical was produced under our dibromination standard conditions and carbon radical intermediate was involved in this dibromination process.

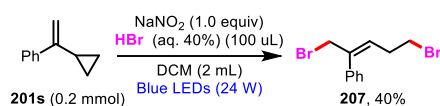

**Scheme S32.** Radical clock experiment of (1-cyclopropylvinyl)benzene

Cyclopropane-containing alkene (1-cyclopropylvinyl)benzene (0.2 mmol, 1.0 equiv),  $\text{NaNO}_2$  (0.2 mmol, 1.0 equiv) and  $\text{HBr}$  (100  $\mu\text{L}$ , aq. 40% in water) were dispersed in  $\text{CH}_2\text{Cl}_2$  (2.0 mL) in a 4 mL glass vial at room temperature. The reaction vial was sealed with a PTEF cap and the reaction mixture vigorously stirred at 30  $^\circ\text{C}$  under the 24 W blue LEDs irradiation for 12 h. Then, the reaction mixture was extracted with  $\text{CH}_2\text{Cl}_2$  ( $3 \times 2$  mL). The combined organic layer was dried over anhydrous  $\text{Na}_2\text{SO}_4$ , filtered and concentrated. The residue was purified by chromatography on silica gel to afford the ring-opening product 24 mg (40%).

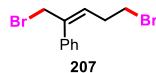

$^1\text{H NMR}$  (500 MHz,  $\text{CDCl}_3$ )  $\delta$  7.47 (d,  $J = 7.6$  Hz, 2H), 7.37 (t,  $J = 7.4$  Hz, 2H), 7.34 – 7.29 (m, 1H), 5.97 (t,  $J = 7.3$  Hz, 1H), 4.36 (s, 2H), 3.54 (t,  $J = 6.9$  Hz, 2H), 2.90 (q,  $J = 7.0$  Hz, 2H).  $^{13}\text{C NMR}$  (126 MHz,  $\text{CDCl}_3$ )  $\delta$  140.05, 138.91, 130.76, 128.70, 128.02,



126.20, 32.11, 31.32, 28.78. **HRMS** Calcd for C<sub>11</sub>H<sub>12</sub>Br<sub>2</sub>K [M+K<sup>+</sup>]: 340.8937; Found: 340.8947.

### Light/dark experiment of dibromination of olefin **1**:

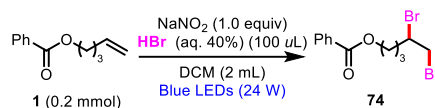

**Scheme S33.** Light/dark experiment of dibromination of **1**

Five vials were equipped with a stir bar and charged with **1** (0.2 mmol, 1.0 equiv), NaNO<sub>2</sub> (0.2 mmol, 1.0 equiv) and HBr (100  $\mu$ L, aq. 40% in water) were dispersed in CH<sub>2</sub>Cl<sub>2</sub> (2.0 mL) in a 4 mL glass vial at room temperature. The reaction vial was sealed with a PTEF cap and the reactions was alternatively irradiated with a Blue LEDs (24 W) and kept in the dark in 1 h intervals. After each interval, one vial was take out, the solvent was removed under reduced pressure, and the yield was determined by <sup>1</sup>H NMR based on a Cl<sub>2</sub>CHCHCl<sub>2</sub> as an internal standard. These results indicated that continuous irradiation with light was essential for promoting the reaction.

| Vial | Time (h)/condition |          |        |          |        | Yield (%) <sup>a</sup> |
|------|--------------------|----------|--------|----------|--------|------------------------|
| 1    | 0-1/hv             |          |        |          |        | 37                     |
| 2    | 0-1/hv             | 1-2/dark |        |          |        | 39                     |
| 3    | 0-1/hv             | 1-2/dark | 2-3/hv |          |        | 50                     |
| 4    | 0-1/hv             | 1-2/dark | 2-3/hv | 3-4/dark |        | 55                     |
| 5    | 0-1/hv             | 1-2/dark | 2-3/hv | 3-4/dark | 4-5/hv | 67                     |

a) NMR yield, average of three experiments.

**Table S3.** Yields of Light/Dark experiment.

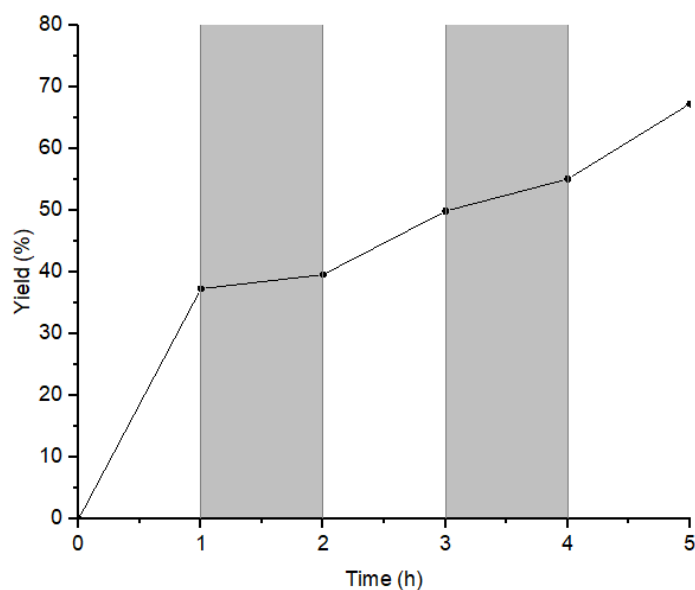

Figure S4. Light/dark experiment of dibromination of 1

### 9.3 Mechanistic studies of nitration of olefins

**Radical scavenger experiment:** Compound **135s** was examined for the nitration reaction in order to prove that nitrogen dioxide radical was produced under our nitration standard conditions.

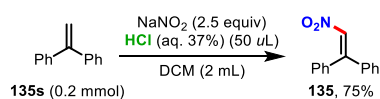

Scheme S34. Radical scavenger experiment

Radical scavenger 1,1-Diphenylethylene (0.2 mmol, 1.0 equiv),  $\text{NaNO}_2$  (0.5 mmol, 2.5 equiv) and HCl (50  $\mu\text{L}$ , aq. 37% in water) were dispersed in  $\text{CH}_2\text{Cl}_2$  (2.0 mL) in a 4 mL glass vial at room temperature. The reaction vial was sealed with a PTEF cap and the reaction mixture vigorously stirred at 30  $^\circ\text{C}$  for 2 h. Then, the reaction mixture was extracted with  $\text{CH}_2\text{Cl}_2$  (3  $\times$  2 mL). The combined organic layer was dried over

anhydrous Na<sub>2</sub>SO<sub>4</sub>, filtered and concentrated. The residue was purified by chromatography on silica gel to afford the nitration product 34 mg (75%).

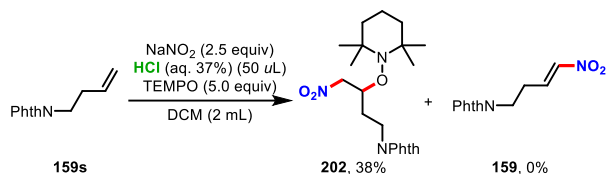

**Scheme S35.** Radical scavenger experiment

Alkene **159s** (0.2 mmol, 1.0 equiv), radical scavenger TEMPO (1.0 mmol, 5.0 equiv), NaNO<sub>2</sub> (0.5 mmol, 2.5 equiv) and HCl (50 uL, aq. 37% in water) were dispersed in CH<sub>2</sub>Cl<sub>2</sub> (2.0 mL) in a 4 mL glass vial at room temperature. The reaction vial was sealed with a PTEF cap and the reaction mixture vigorously stirred at 30 °C for 2 h. Then, the reaction mixture was extracted with CH<sub>2</sub>Cl<sub>2</sub> (3 × 2 mL). The combined organic layer was dried over anhydrous Na<sub>2</sub>SO<sub>4</sub>, filtered and concentrated. The residue was purified by chromatography on silica gel to afford the corresponding product of radical trapping the product 31 mg (38%) and formation of nitration product **159** was completely inhibited.

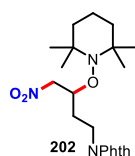

<sup>1</sup>H NMR (500 MHz, CDCl<sub>3</sub>) δ 7.87 – 7.81 (m, 2H), 7.74 – 7.68 (m, 2H), 4.26 – 3.84 (m, 3H), 2.81 (m, 2H), 1.64 (t, *J* = 12.0 Hz, 4H), 1.55 – 1.47 (m, 2H), 1.44 – 1.33 (m, 2H), 1.12 (s, 6H), 1.03 (s, 6H). <sup>13</sup>C NMR (126 MHz, CDCl<sub>3</sub>) δ 167.96, 134.04, 132.04, 123.33, 60.07, 39.00, 33.76, 31.96, 31.02, 29.71, 20.50, 16.92.<sup>33</sup>

**Radical clock experiment:** Compounds **203s** and **201s** were examined for the nitration reaction in order to prove that nitrogen dioxide radical was produced under our nitration

standard conditions and carbon radical intermediate was involved in this nitration process.

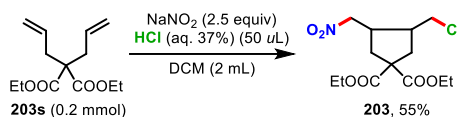

**Scheme S36.** Radical clock experiment of Diethyl 2,2-diallylmalonate

Diethyl 2,2-diallylmalonate (0.2 mmol, 1.0 equiv),  $\text{NaNO}_2$  (0.5 mmol, 2.5 equiv) and  $\text{HCl}$  (50  $\mu\text{L}$ , aq. 37% in water) were dispersed in  $\text{CH}_2\text{Cl}_2$  (2.0 mL) in a 4 mL glass vial at room temperature. The reaction vial was sealed with a PTEF cap and the reaction mixture vigorously stirred at 30  $^\circ\text{C}$  for 2 h. Then, the reaction mixture was extracted with  $\text{CH}_2\text{Cl}_2$  (3  $\times$  2 mL). The combined organic layer was dried over anhydrous  $\text{Na}_2\text{SO}_4$ , filtered and concentrated. The residue was purified by chromatography on silica gel to afford the cyclization product 35 mg (55%).

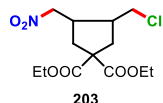

$^1\text{H NMR}$  (500 MHz,  $\text{CDCl}_3$ )  $\delta$  4.53 (dd,  $J = 13.0, 6.4$  Hz, 1H), 4.33 (dd,  $J = 12.9, 9.3$  Hz, 1H), 4.14 – 4.08 (m, 4H), 3.55 – 3.33 (m, 2H), 3.00 – 2.85 (m, 1H), 2.63 – 2.55 (m, 1H), 2.51 – 2.36 (m, 2H), 2.18 – 2.07 (m, 2H), 1.16 (t,  $J = 7.1$  Hz, 6H).  $^{13}\text{C NMR}$  (126 MHz,  $\text{CDCl}_3$ )  $\delta$  171.62, 171.44, 77.42, 77.16, 76.91, 75.12, 61.88, 61.82, 58.23, 43.79, 42.94, 39.49, 36.99, 36.78, 13.84. **HRMS** Calcd for  $\text{C}_{13}\text{H}_{20}\text{ClNNaO}_6$  [ $\text{M}+\text{Na}^+$ ]: 344.0871; Found: 344.0871.

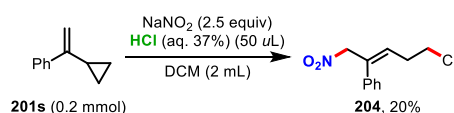

**Scheme S37.** Radical clock experiment of (1-cyclopropylvinyl)benzene

Cyclopropane-containing alkene (1-cyclopropylvinyl)benzene (0.2 mmol, 1.0 equiv), NaNO<sub>2</sub> (0.5 mmol, 2.5 equiv) and HCl (50  $\mu$ L, aq. 37% in water) were dispersed in CH<sub>2</sub>Cl<sub>2</sub> (2.0 mL) in a 4 mL glass vial at room temperature. The reaction vial was sealed with a PTEF cap and the reaction mixture vigorously stirred at 30 °C for 2 h. Then, the reaction mixture was extracted with CH<sub>2</sub>Cl<sub>2</sub> (3  $\times$  2 mL). The combined organic layer was dried over anhydrous Na<sub>2</sub>SO<sub>4</sub>, filtered and concentrated. The residue was purified by chromatography on silica gel to afford the ring-opening product 9 mg (20%).

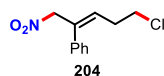

<sup>1</sup>H NMR (500 MHz, CDCl<sub>3</sub>)  $\delta$  7.41 – 7.31 (m, 5H), 6.26 (t,  $J$  = 7.4 Hz, 1H), 5.42 (s, 2H), 3.69 (t,  $J$  = 6.5 Hz, 2H), 2.83 (q,  $J$  = 6.8 Hz, 2H). <sup>13</sup>C NMR (126 MHz, CDCl<sub>3</sub>)  $\delta$  139.29, 134.22, 132.59, 128.95, 128.41, 126.27, 74.74, 43.40, 32.32. HRMS Calcd for C<sub>11</sub>H<sub>12</sub>ClNNaO<sub>2</sub> [M+Na<sup>+</sup>]: 248.0449; Found: 248.0445.

**Carbonradical vs carbocation experiment:** Compound **205s** was examined for the nitration reaction in order to prove that carbocation intermediate was not involved in this nitration process.

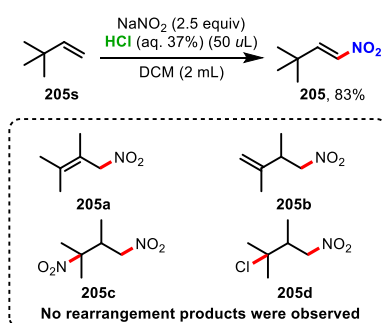

**Scheme S38.** Carbonradical vs carbocation experiment

Alkene 3,3-dimethylbut-1-ene (0.2 mmol, 1.0 equiv), NaNO<sub>2</sub> (0.5 mmol, 2.5 equiv) and HCl (50  $\mu$ L, aq. 37% in water) were dispersed in CH<sub>2</sub>Cl<sub>2</sub> (2.0 mL) in a 4 mL glass vial at room temperature. The reaction vial was sealed with a PTEF cap and the reaction

mixture vigorously stirred at 30 °C for 2 h. Then, the reaction mixture was extracted with CH<sub>2</sub>Cl<sub>2</sub> (3 × 2 mL). The combined organic layer was dried over anhydrous Na<sub>2</sub>SO<sub>4</sub>, filtered and concentrated. The residue was purified by chromatography on silica gel to afford nitration product 21.4 mg (83%). There is no rearrangement products.

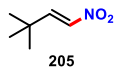

<sup>1</sup>H NMR (500 MHz, CDCl<sub>3</sub>) δ 7.25 (d, J = 13.5 Hz, 1H), 6.88 (d, J = 13.6 Hz, 1H), 1.15 (s, 9H). <sup>13</sup>C NMR (126 MHz, CDCl<sub>3</sub>) δ 152.10, 137.27, 32.81, 28.55.<sup>46</sup>

## 10. References

- [1] F. Liu, Q. Bian, J. Mao, Z. Gao, D. Liu, S. Liu, X. Wang, Y. Wang, M. Wang, J. Zhong, *Tetrahedron Asymmetry*. **2016**, *27*, 663-669.
- [2] S. Guo, X. Zhang, P. Tang, *Angew. Chem. Int. Ed.* **2015**, *54*, 4065-4069.
- [3] N. Iranpoor, H. Firouzabadi, D. Khalili, S. Motevalli, *J. Org. Chem.* **2008**, *73*, 4882-4887.
- [4] S. Hou, Y. Zhang, P. Jiang, *Polym. Degrad. Stab.* **2018**, *153*, 155-164.
- [5] J. Huang, F. Sun, W. Liu, *J. Catal.* **2023**, *423*, 19-25.
- [6] M. Rani, N. Borduas, V. Colquhoun, R. Hanley, H. Johnson, S. Larger, P. D. Lickiss, V. Llopis-Mestre, S. Luu, M. Mogstad, P. Oczipka, J. R. Sherwood, T. Welton, J. Y. Xing, *Green Chem.* **2014**, *16*, 1282-1296.
- [7] M. Harris, M. Konev, E. Jarvo, *J. Am. Chem. Soc.* **2014**, *136*, 7825-7828.
- [8] M. Larraufie, R. Pellet, L. Fensterbank, J. Goddard, E. Lacôte, M. Malacria, C. Ollivier, *Angew. Chem. Int. Ed.* **2011**, *50*, 4463-4466.
- [9] Ł. Woźniak, A. Rajkiewicz, L. Monsigny, A. Kajetanowicz, K. Grela, *Org. Lett.* **2020**, *22*, 4970-4973.
- [10] J. Bodkin, G. Bacskey, M. McLeod, *Org. Biomol. Chem.* **2008**, *6*, 2544-2553.
- [11] J. Adamek, R. Mazurkiewicz, A. Węgrzyk, K. Erfurt, *Beilstein J. Org. Chem.* **2017**, *13*, 1446-1455.
- [12] S. Zhou, Z. Zhang, J. Yu, *Nature*, **2024**, *629*, 363-369.

- [13] Y. Terada, M. Arisawa, A. Nishida, *Angew. Chem. Int. Ed.* **2004**, *43*, 4063-4067.
- [14] J. Cao, D. Lv, F. Yu, M. Chiou, Y. Li, H. Bao, *Org. Lett.* **2021**, *23*, 3184-3189.
- [15] K. Bian, D. Nemoto, X. Chen, S. Kao, J. Hoosona, J. West, *Chem. Sci.* **2024**, *15*, 124-133.
- [16] P. Lian, W. Long, J. Li, Y. Zheng, X. Wan, *Angew. Chem. Int. Ed.* **2020**, *59*, 23603-23608.
- [17] N. Fu, G. Sauer, S. Lin, *J. Am. Chem. Soc.* **2017**, *139*, 15548-15553.
- [18] M. Li, M. Qiu, Y. Ren, H. Li, W. An, *ChemistrySelect*, **2024**, *9*, e202304488.
- [19] X. Li, J. Jin, P. Chen, G. Liu, *Nat Chem.* **2022**, *14*, 425-432.
- [20] X. Zeng, Y. Tu, Z. Zhang, C. You, J. Wu, Z. Ye, J. Zhao, *J. Org. Chem.* **2019**, *84*, 4458-4466.
- [21] L. Wang, L. Zhai, J. Chen, Y. Gong, P. Wang, H. Li, X. She, *J. Org. Chem.* **2022**, *87*, 3177-3183.
- [22] Y. Wang, J. Wang, Y. Xiong, Z. Liu, *Tetrahedron letters.* **2014**, *55*, 2734-2737.
- [23] M. Karki, J. Magolan, *J. Org. Chem.* **2015**, *80*, 3701-3707.
- [24] J. Seitz, T. Wirth, *Org. Biomol. Chem.* **2021**, *19*, 6892-6896.
- [25] S. Song, X. Li, X. Sun, Y. Yuan, N. Jiao, *Green Chem.* **2015**, *17*, 3285-3289.
- [26] N. Loy, S. Kim, C. Park, *Org. Lett.* **2015**, *17*, 395-397.
- [27] M. Wang, T. Niu, C. Xu, *Eur. J. Org. Chem.* **2024**, *27*, e202400055.
- [28] D. Braddock, D. Roy, D. Lenoir, E. Moore, H. Rzepa, J. Wu, P. Schleyer, *Chem. Commun.* **2012**, *48*, 8943-8945.
- [29] L. Niu, H. Guo, F. Jia, J. Shen, Y. Wang, X. Hu, *Chem. Commun.* **2024**, *60*, 3202-3204.
- [30] S. Li, K. Huang, B. Cao, J. Zhang, W. Wu, X. Zhang, *Angew. Chem. Int. Ed.* **2012**, *51*, 8573 - 8576.
- [31] S. Patra, I. Mosiagin, R. Giri, T. Nauser, D. Katayev, *Angew. Chem. Int. Ed.* **2023**, *62*, e202300533.
- [32] G. Creech, O. Kwon, *Chem. Sci.* **2013**, *4*, 2670-2674.

- [33] X. Huang, H. You, F. Fang, F. Wang, Z. Liu, *Chem. Commun.* **2023**, 59, 13352-13354.
- [34] J. Li, Q. Hu, X. Chen, K. Hou, A. Chan, X. Xiong, *Chin. Chem. Lett.* **2020**, 31, 697-700.
- [35] M. Buendia, S. Kegnæs, S. Kramer, *Adv. Synth. Catal.* **2020**, 362, 5506-5512.
- [36] D. Enders, C. Wang, J. Bats, *Angew. Chem. Int. Ed.* **2008**, 47, 7539-7542.
- [37] S. Maity, T. Naveen, U. Sharma, D. Maiti, *Org. Lett.* **2013**, 15, 3384-3387.
- [38] L. Zhou, R. Huang, S. Lu, B. Liu, M. Gao, B. Xu, *Org. Lett.* **2023**, 25, 1415-1419.
- [39] E. Corey, H. Estreicher, *Tetrahedron Lett.* **1980**, 21, 1113-1116.
- [40] M. Bazin, L. Kihel, M. Boulouard, V. Bouët, S. Rault, *Steroids.* **2009**, 74, 931-937.
- [41] E. Taylor, B. Liu, *J. Org. Chem.* **2003**, 68, 9938-9947.
- [42] E. Taylor, B. Liu, *Tetrahedron Lett.* **1990**, 40, 4027-4030.
- [43] S. Zhang, A. Ullah, Y. Yamamoto, A. Almansour, N. Arumugam, R. Kumar, M. Bao, *ChemistrySelect.* **2017**, 2, 3414-3418.
- [44] Y. Tan, Y. Zhao, D. Yang, J. Lv, Z. Guan, Y. He, *J. Org. Chem.* **2023**, 88, 5161-5171.
- [45] D. Chen, J. Li, P. Cui, Y. Shan, Y. Zhao, G. Qiu, *Eur. J. Org. Chem.* **2020**, 2, 169-175.
- [46] S. Greszler, G. Zhao, M. Buchman, X. Searle, B. Liu, E. Voight, *J. Org. Chem.* **2020**, 85, 7620-7632.



## 11. $^1\text{H}$ NMR, $^{13}\text{C}$ NMR and $^{19}\text{F}$ NMR spectra

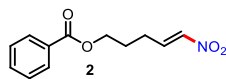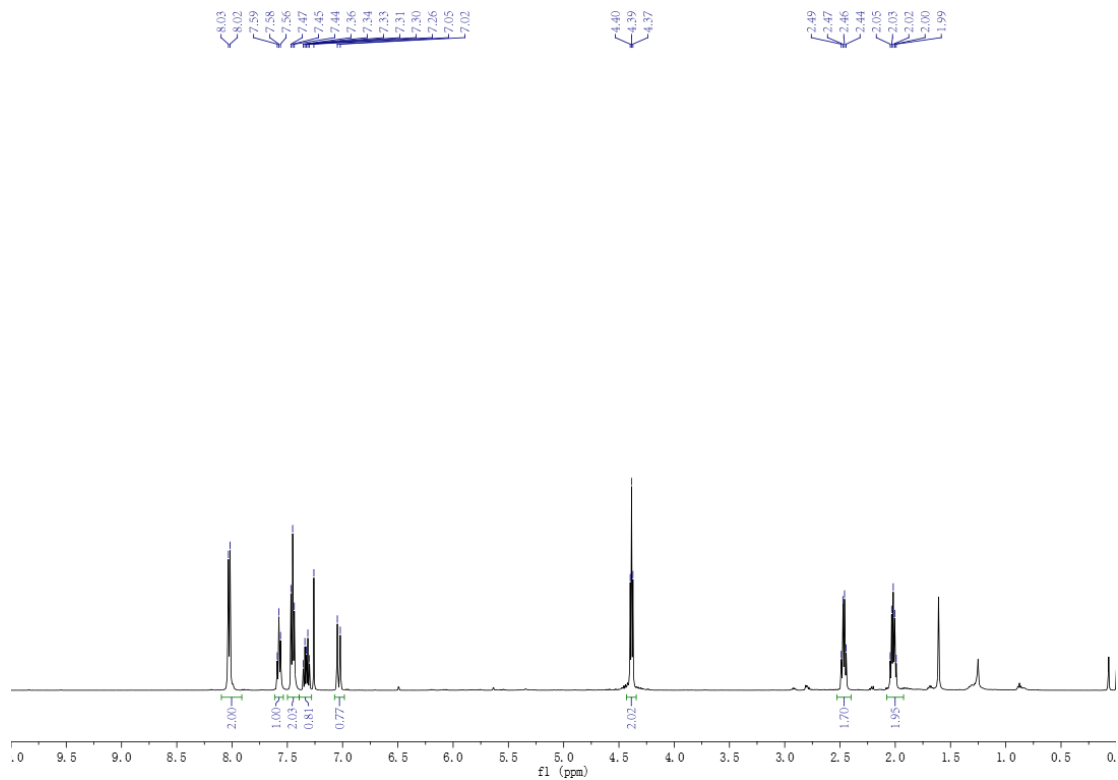

$^1\text{H}$  NMR of compound **2** (500 MHz,  $\text{CDCl}_3$ )

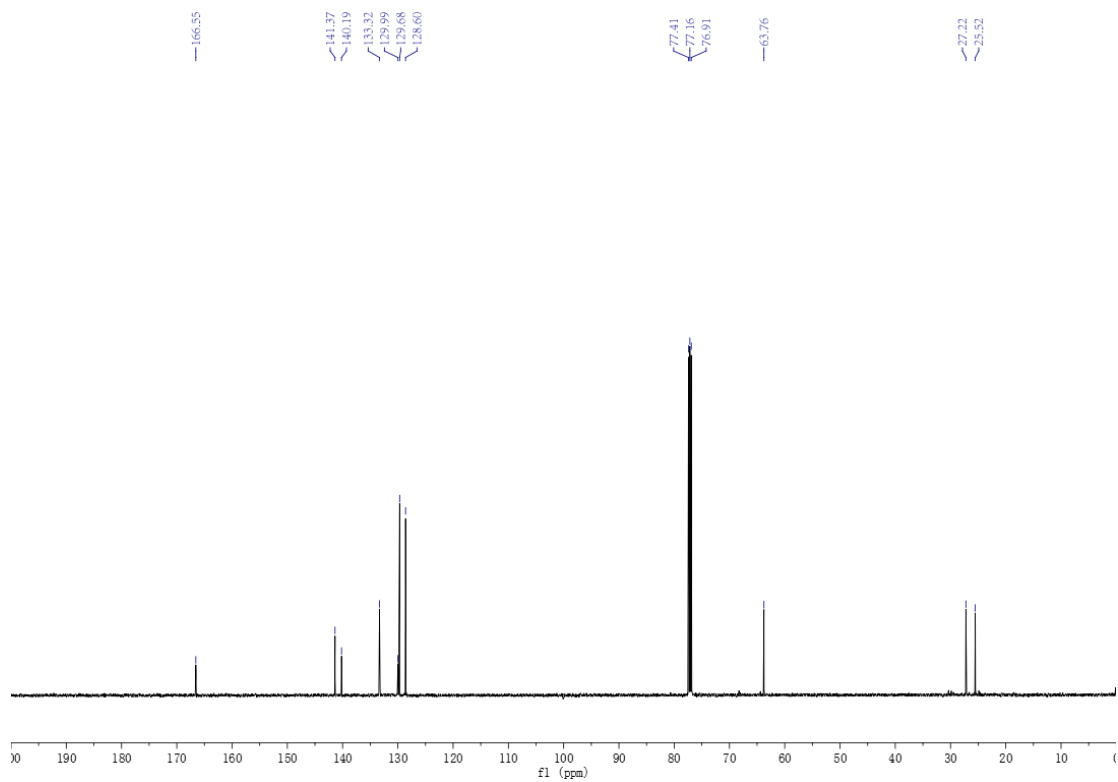

$^{13}\text{C}$  NMR of compound **2** (126 MHz,  $\text{CDCl}_3$ )

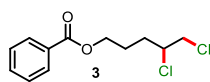

8.05  
8.04  
7.58  
7.57  
7.55  
7.45  
7.43  
7.28

4.39  
4.38  
4.37  
4.36  
4.14  
4.13  
4.12  
4.11  
4.10  
4.09  
3.82  
3.81  
3.80  
3.79  
3.69  
3.68  
3.67  
3.65  
2.21  
2.20  
2.19  
2.18  
2.07  
2.06  
1.94  
1.91  
1.89  
1.87

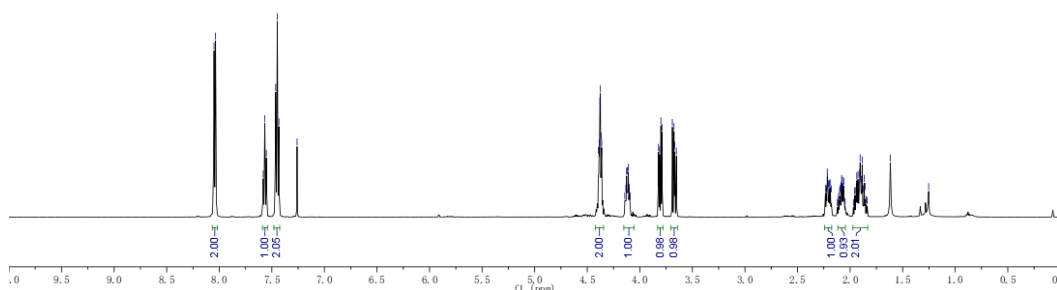

<sup>1</sup>H NMR of compound 3 (500 MHz, CDCl<sub>3</sub>)

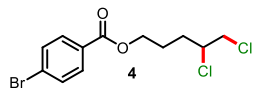

7.90  
7.88  
7.88  
7.28

4.39  
4.38  
4.37  
4.36  
4.11  
3.82  
3.81  
3.80  
3.79  
3.69  
3.68  
3.67  
3.65  
3.04  
2.21  
2.20  
2.19  
2.07  
2.06  
1.93  
1.90  
1.89  
1.88  
1.87  
1.28

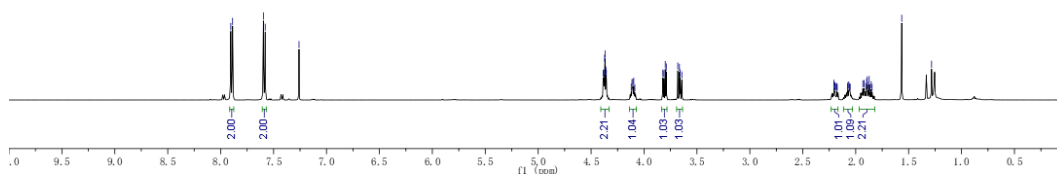

<sup>1</sup>H NMR of compound 4 (500 MHz, CDCl<sub>3</sub>)

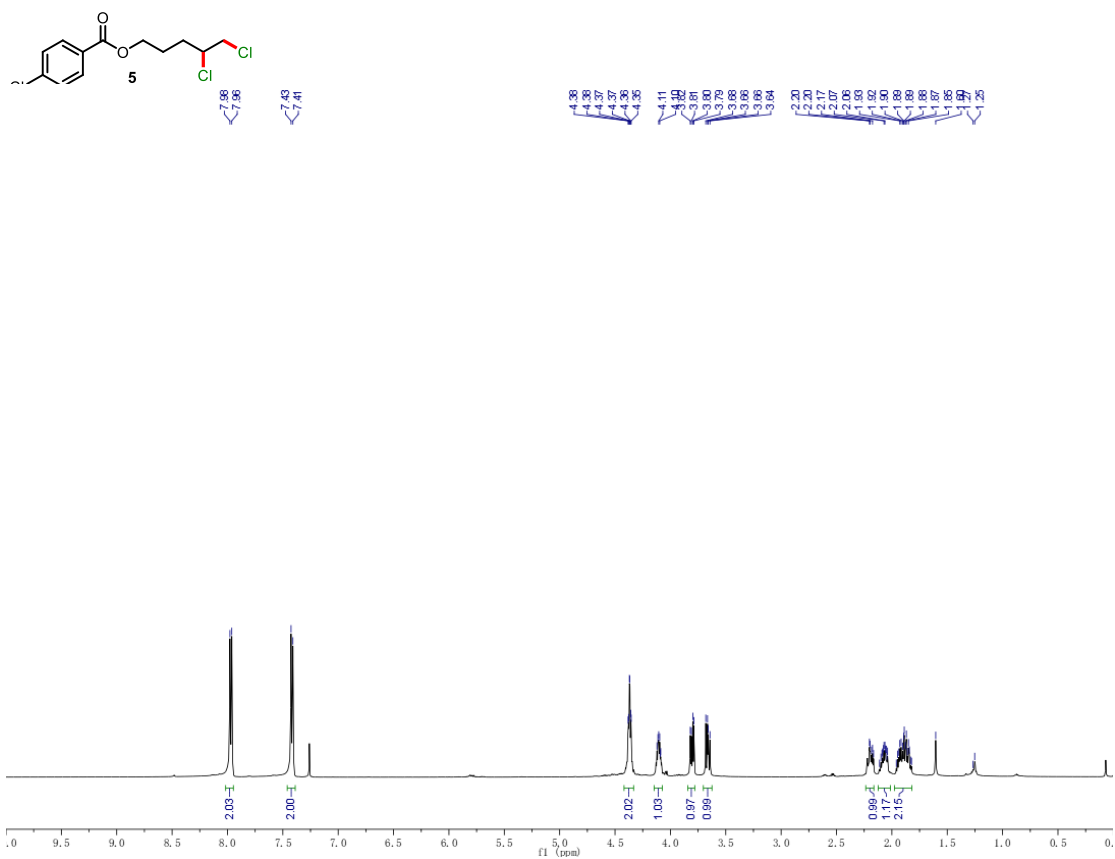

<sup>1</sup>H NMR of compound 5 (500 MHz, CDCl<sub>3</sub>)

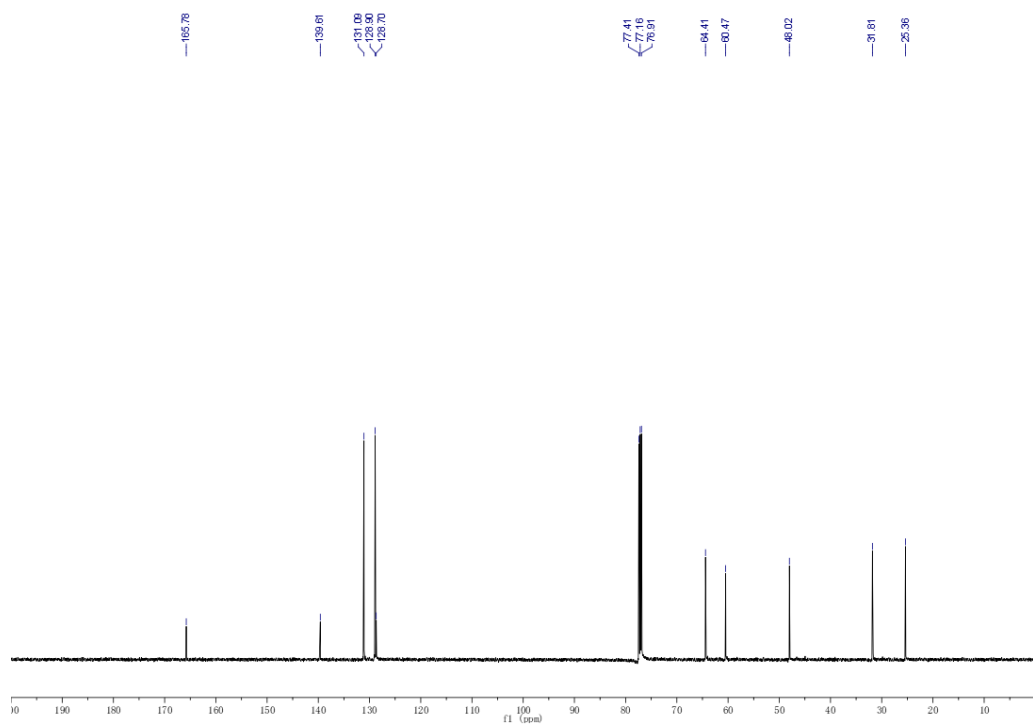

<sup>13</sup>C NMR of compound 5 (126 MHz, CDCl<sub>3</sub>)

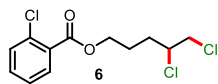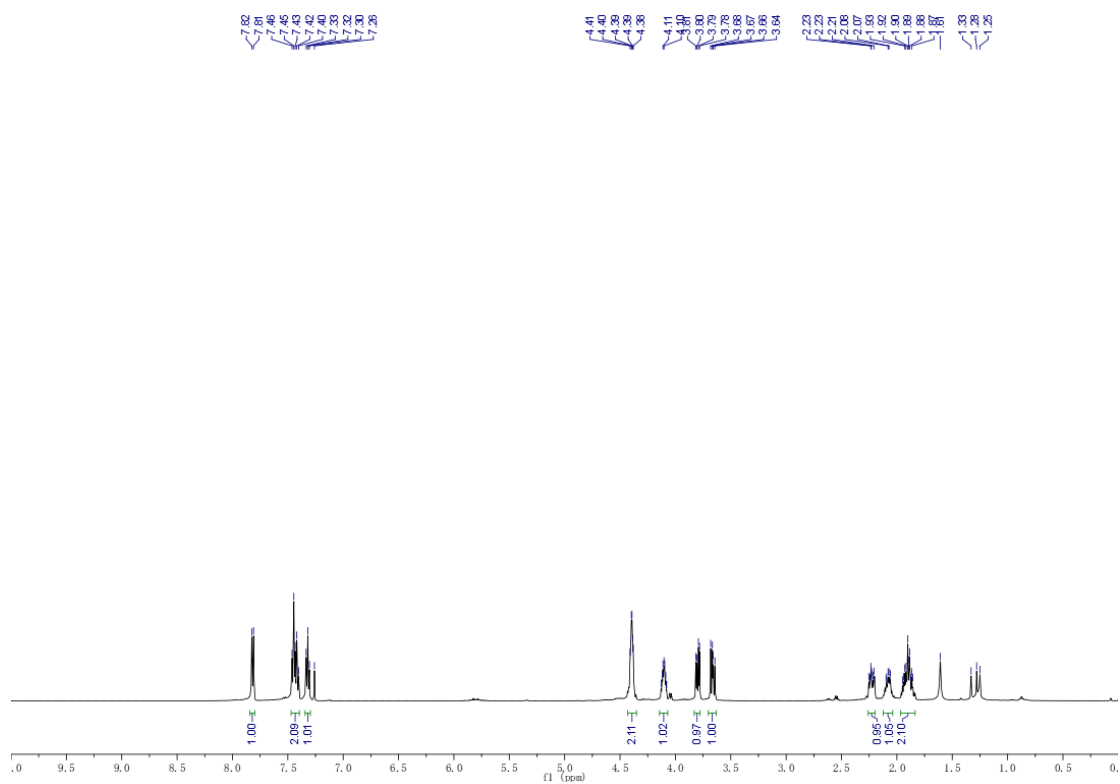

$^1\text{H}$  NMR of compound **6** (500 MHz,  $\text{CDCl}_3$ )

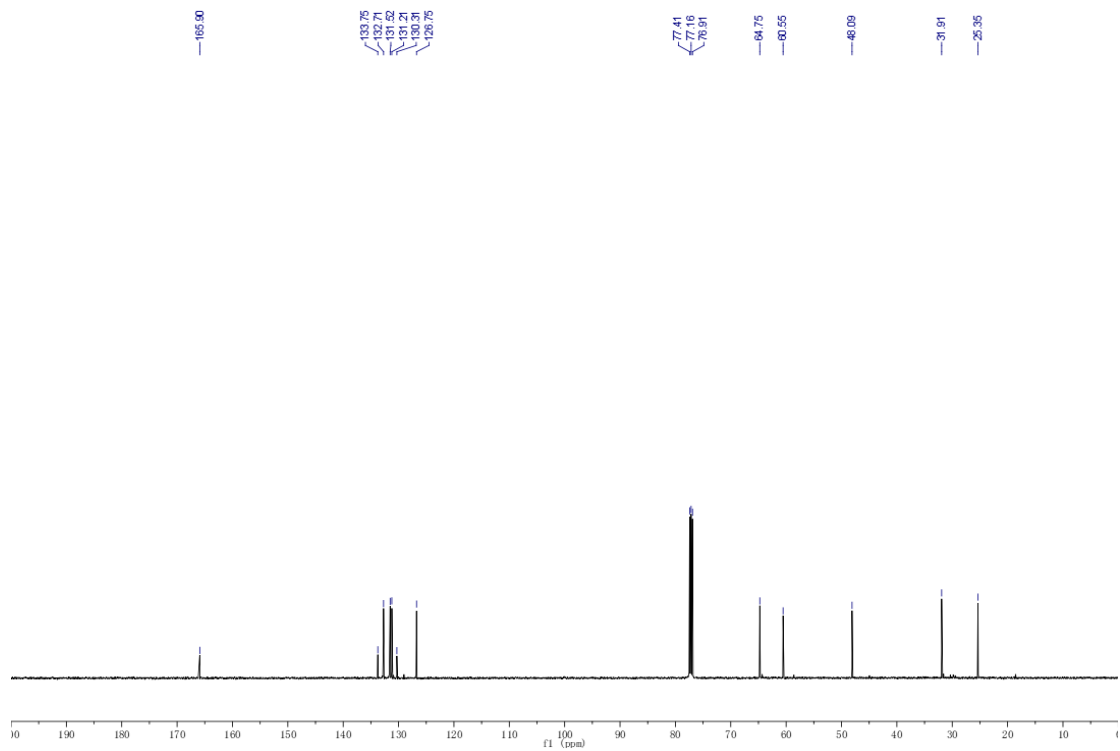

$^{13}\text{C}$  NMR of compound **6** (126 MHz,  $\text{CDCl}_3$ )

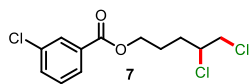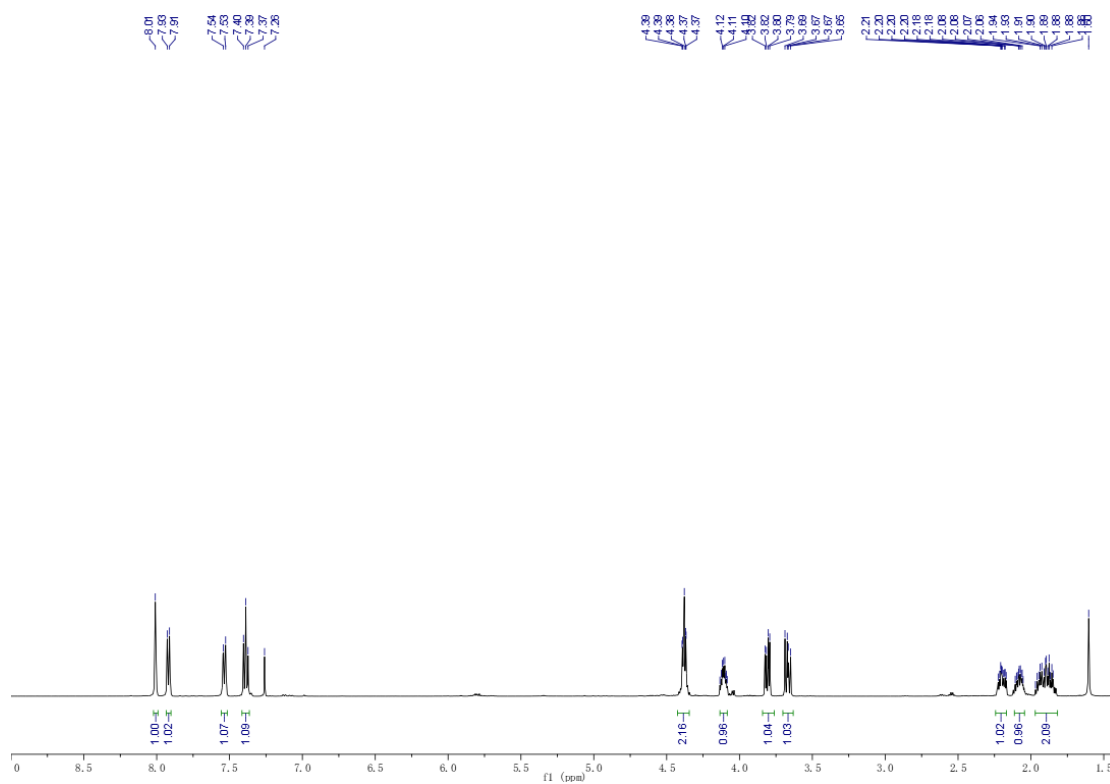

$^1\text{H}$  NMR of compound 7 (500 MHz,  $\text{CDCl}_3$ )

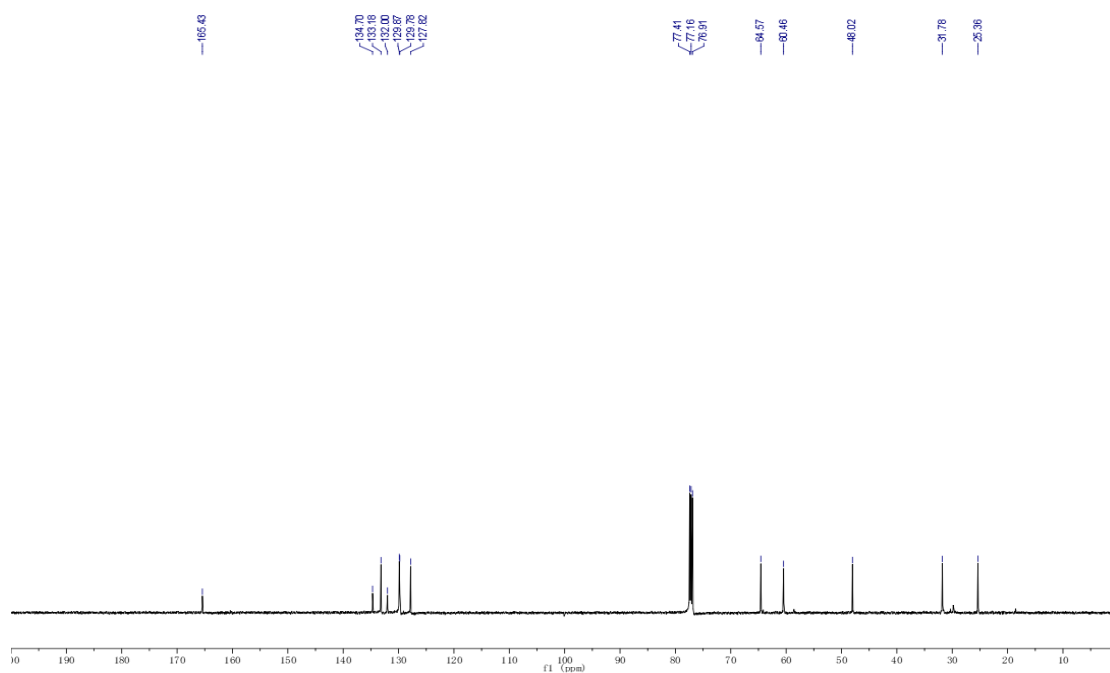

$^{13}\text{C}$  NMR of compound 7 (126 MHz,  $\text{CDCl}_3$ )

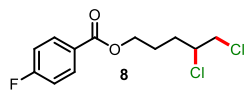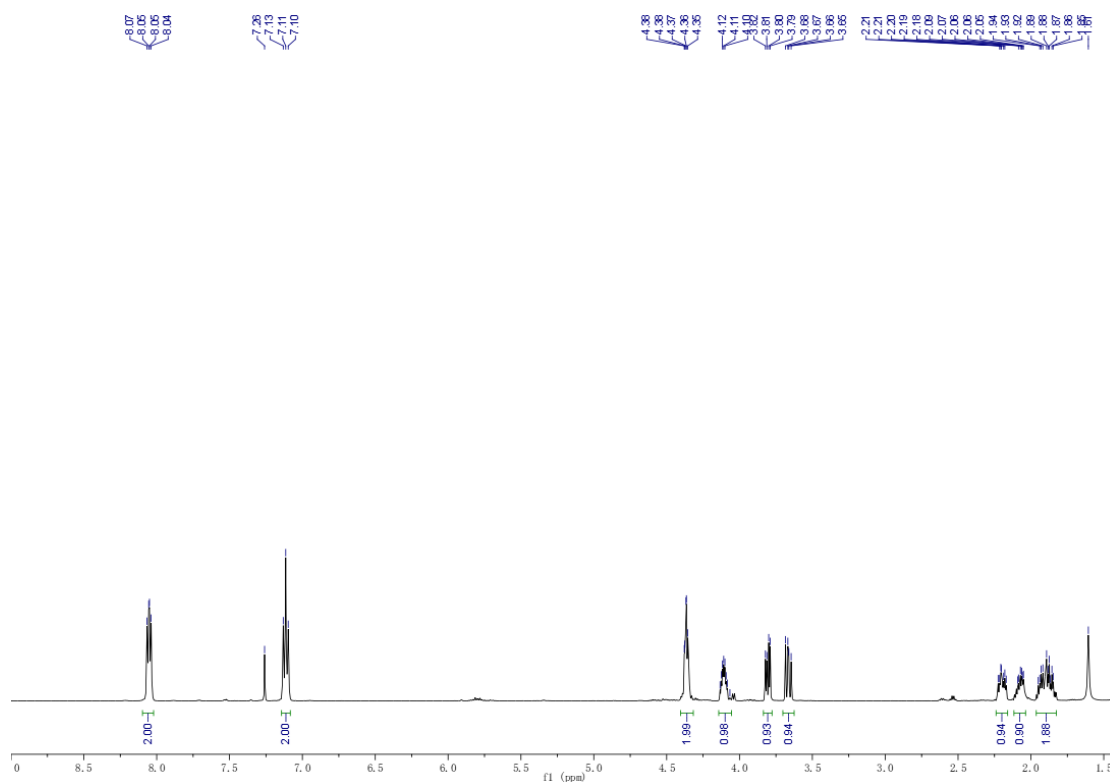

<sup>1</sup>H NMR of compound **8** (500 MHz, CDCl<sub>3</sub>)

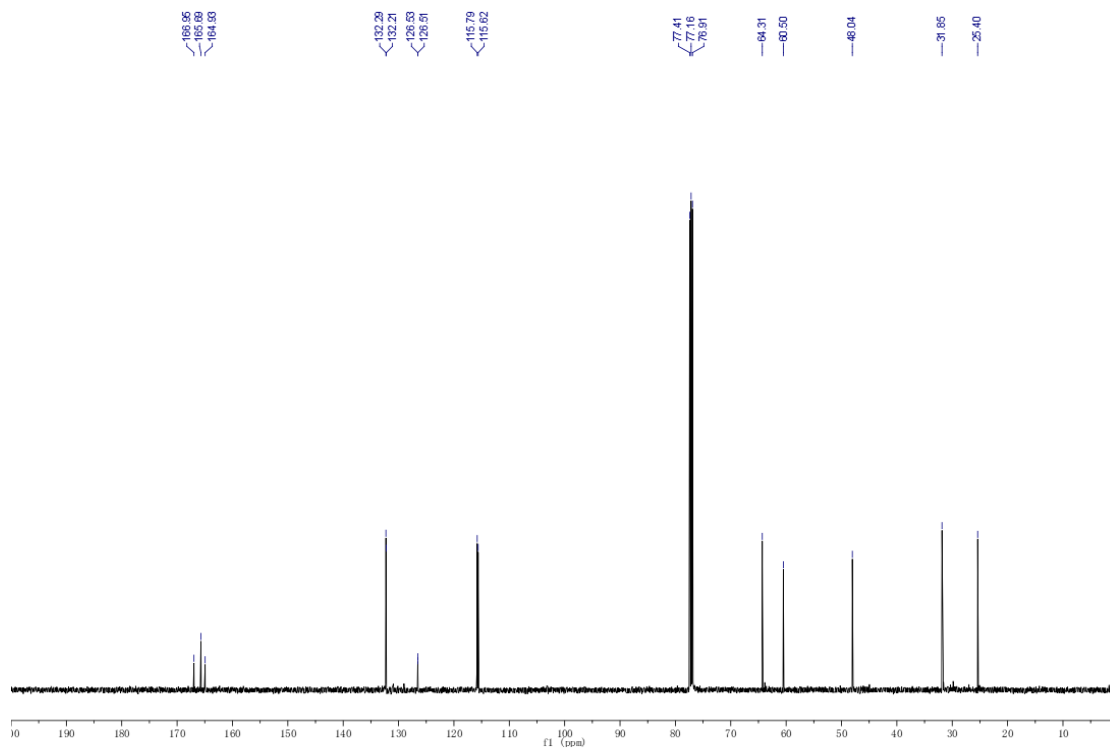

<sup>13</sup>C NMR of compound **8** (126 MHz, CDCl<sub>3</sub>)

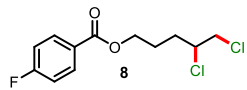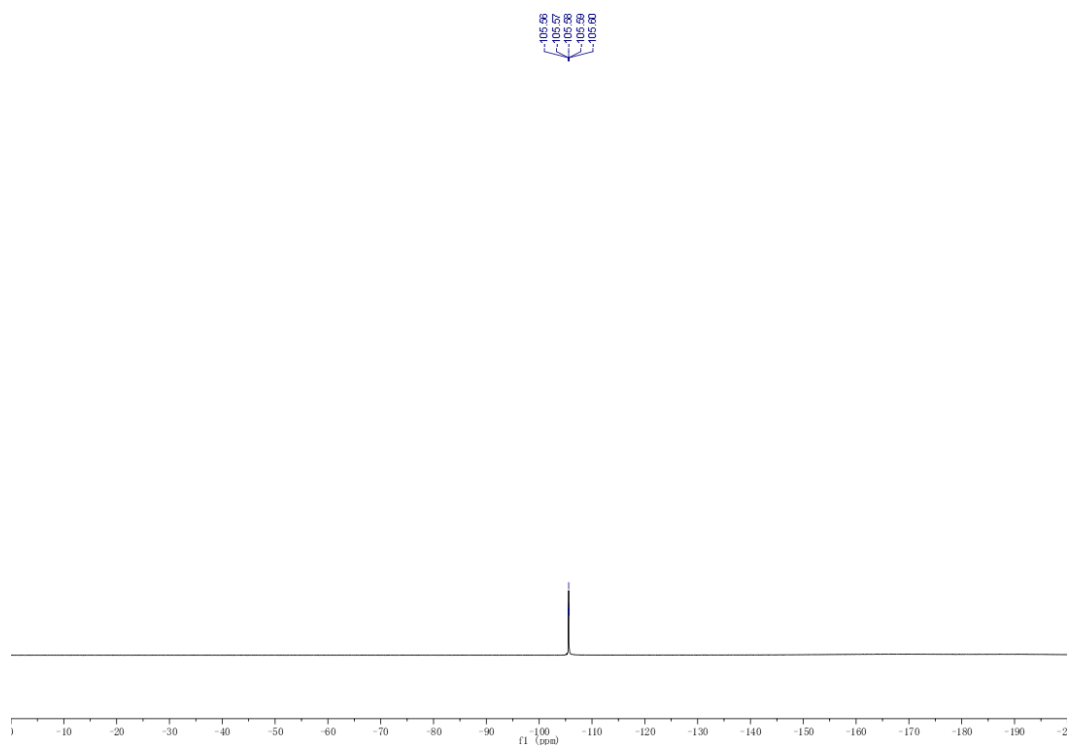

$^{19}\text{F}$  NMR of compound **8** (471 MHz,  $\text{CDCl}_3$ )

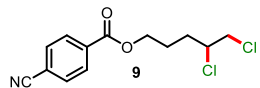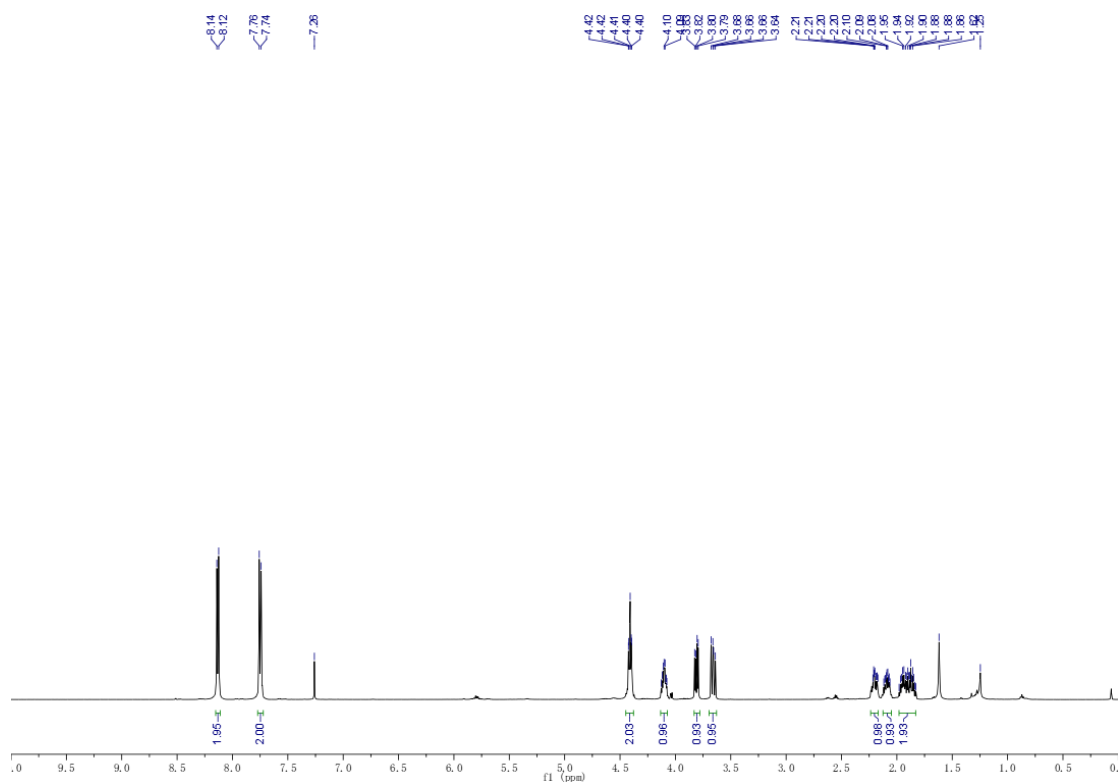

<sup>1</sup>H NMR of compound **9** (500 MHz, CDCl<sub>3</sub>)

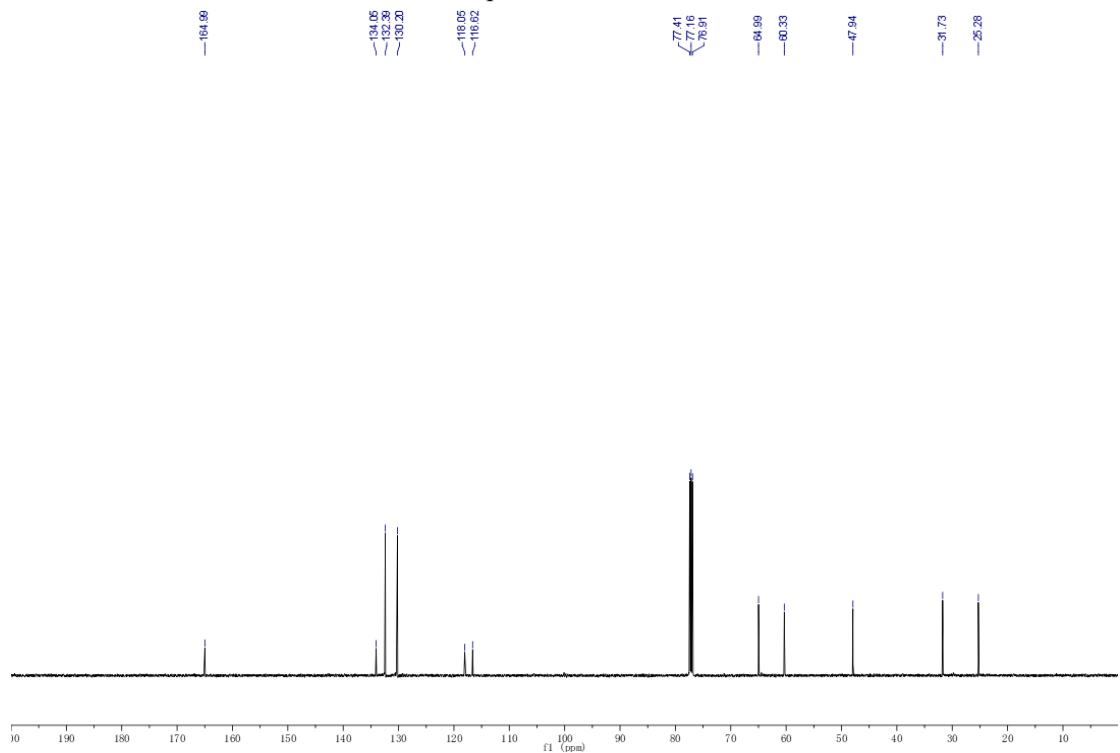

<sup>13</sup>C NMR of compound **9** (126 MHz, CDCl<sub>3</sub>)



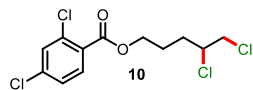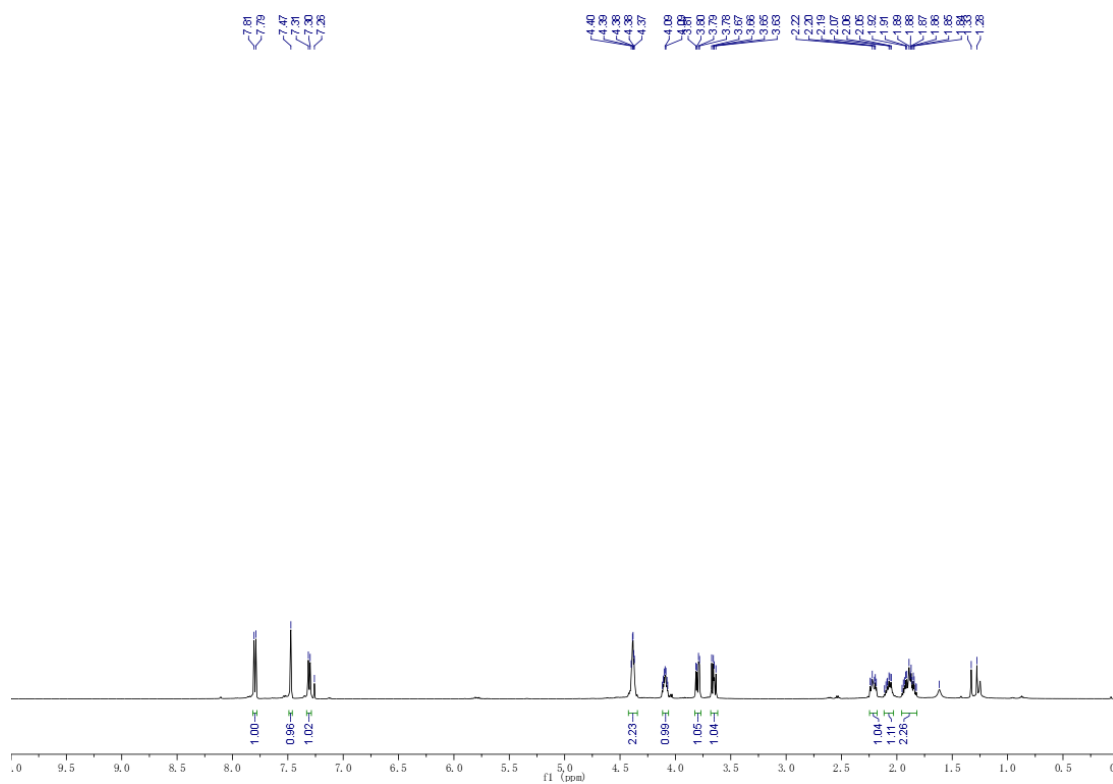

<sup>1</sup>H NMR of compound **10** (500 MHz, CDCl<sub>3</sub>)

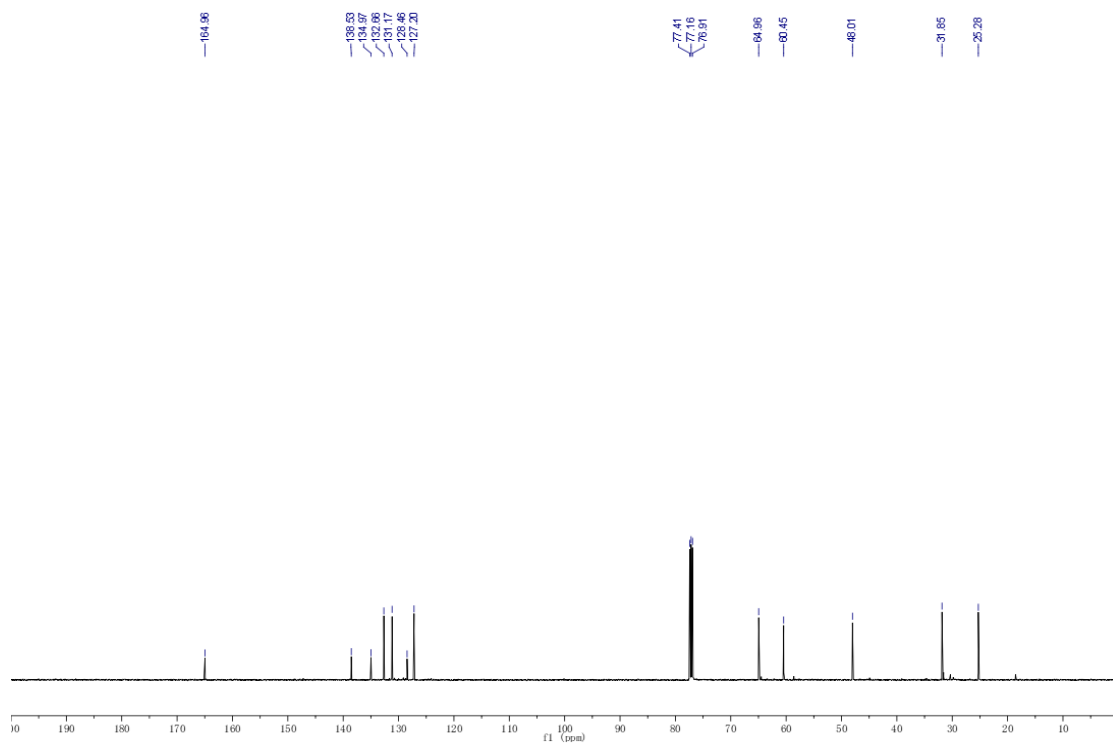

<sup>13</sup>C NMR of compound **10** (126 MHz, CDCl<sub>3</sub>)

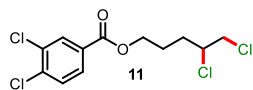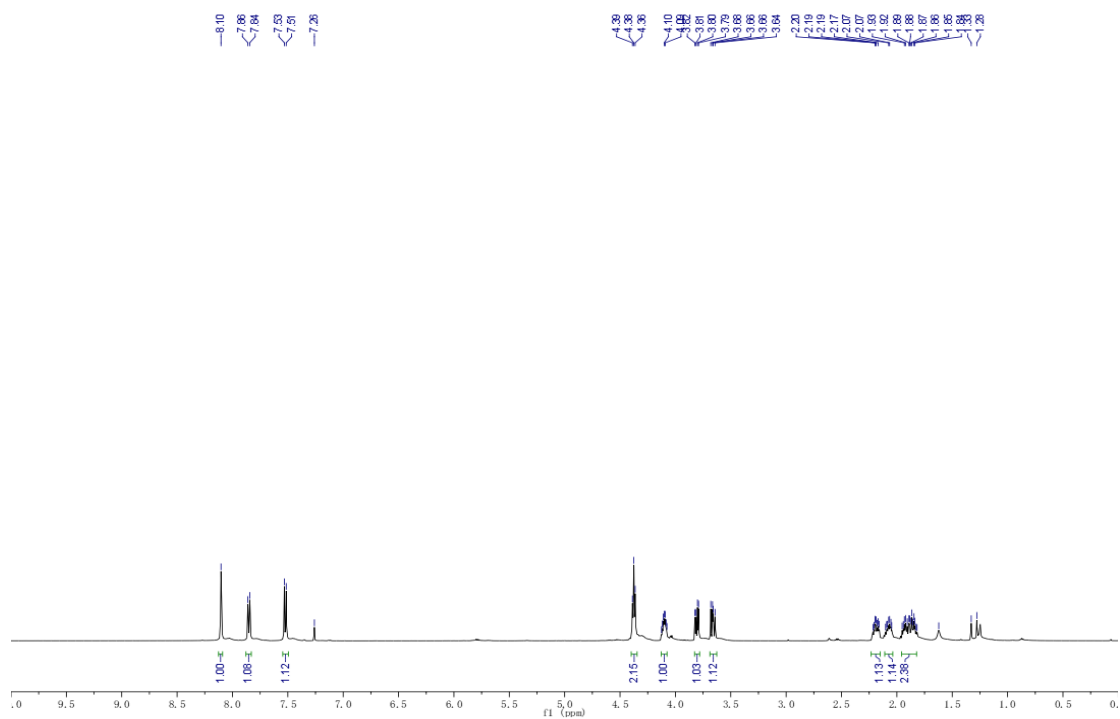

<sup>1</sup>H NMR of compound **11** (500 MHz, CDCl<sub>3</sub>)

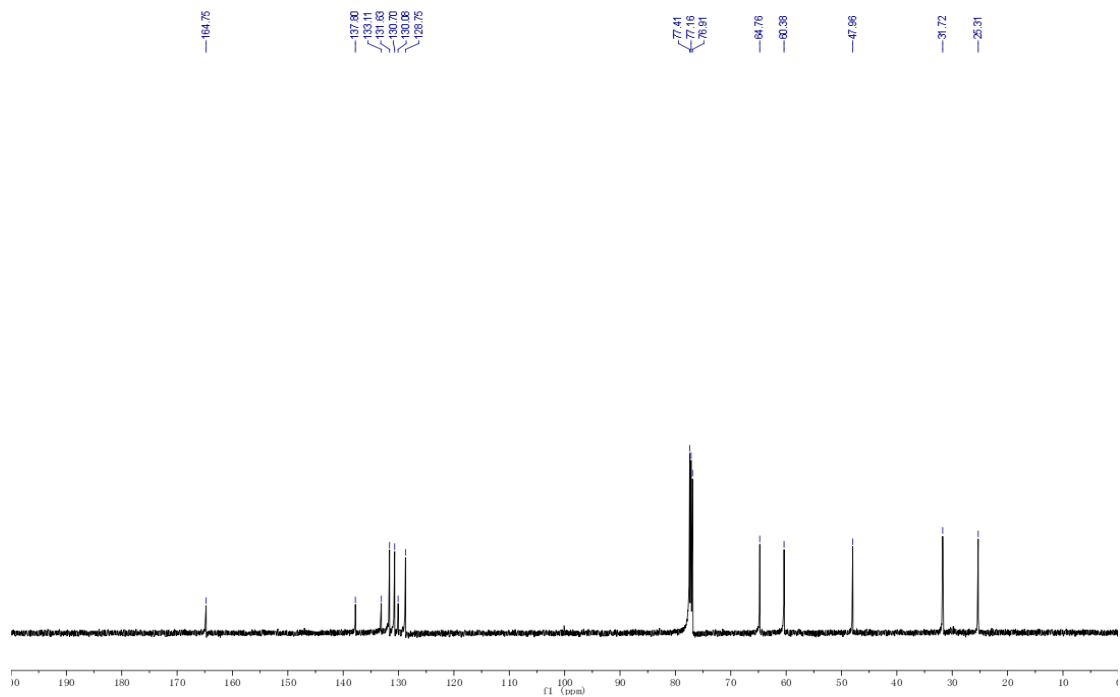

<sup>13</sup>C NMR of compound **11** (126 MHz, CDCl<sub>3</sub>)

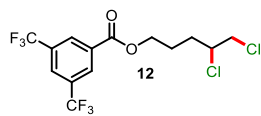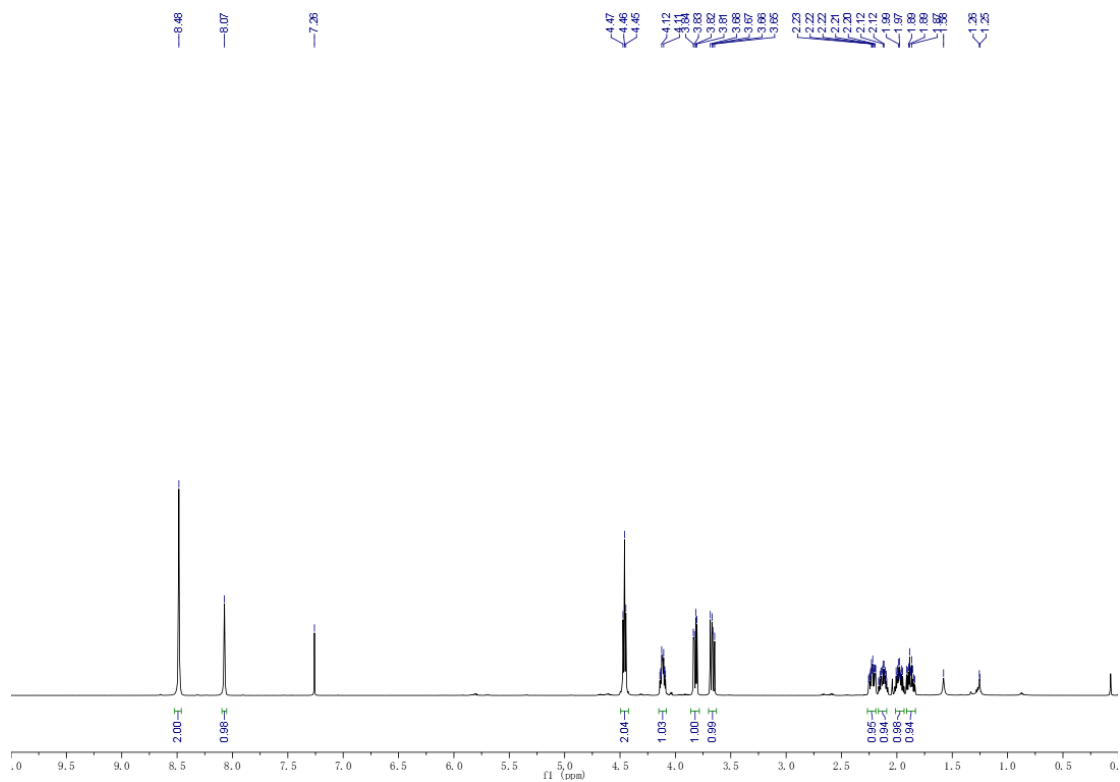

$^1\text{H}$  NMR of compound **12** (500 MHz,  $\text{CDCl}_3$ )

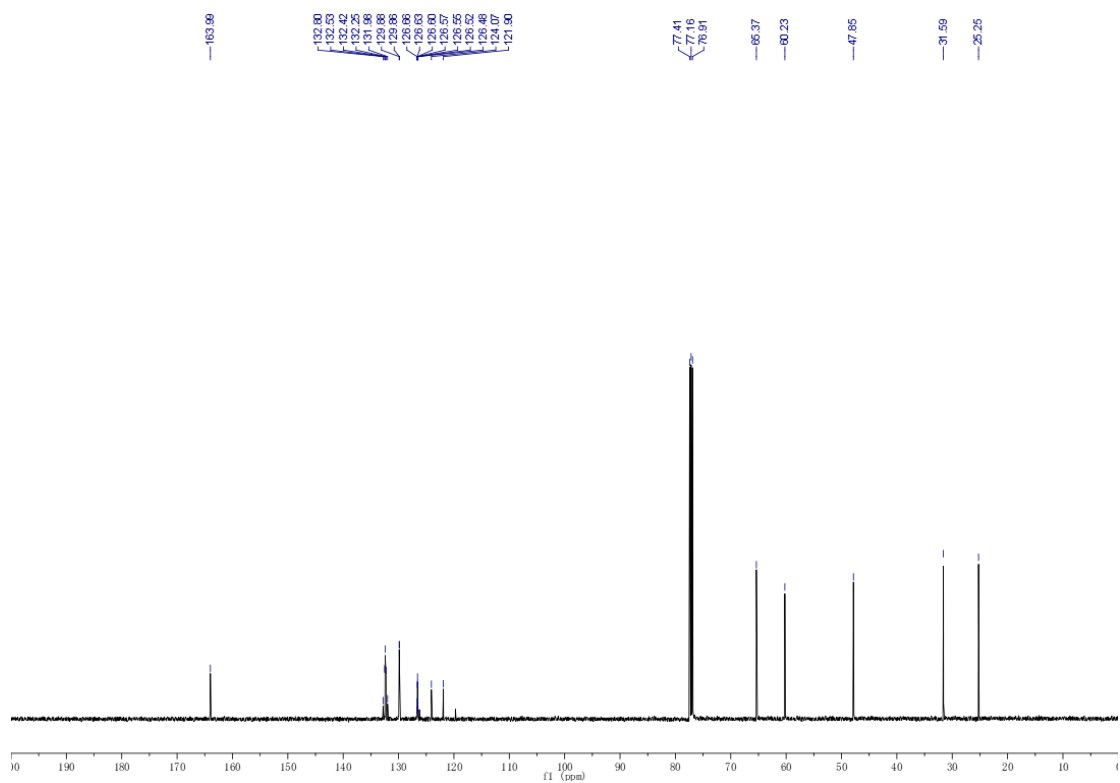

$^{13}\text{C}$  NMR of compound **12** (126 MHz,  $\text{CDCl}_3$ )

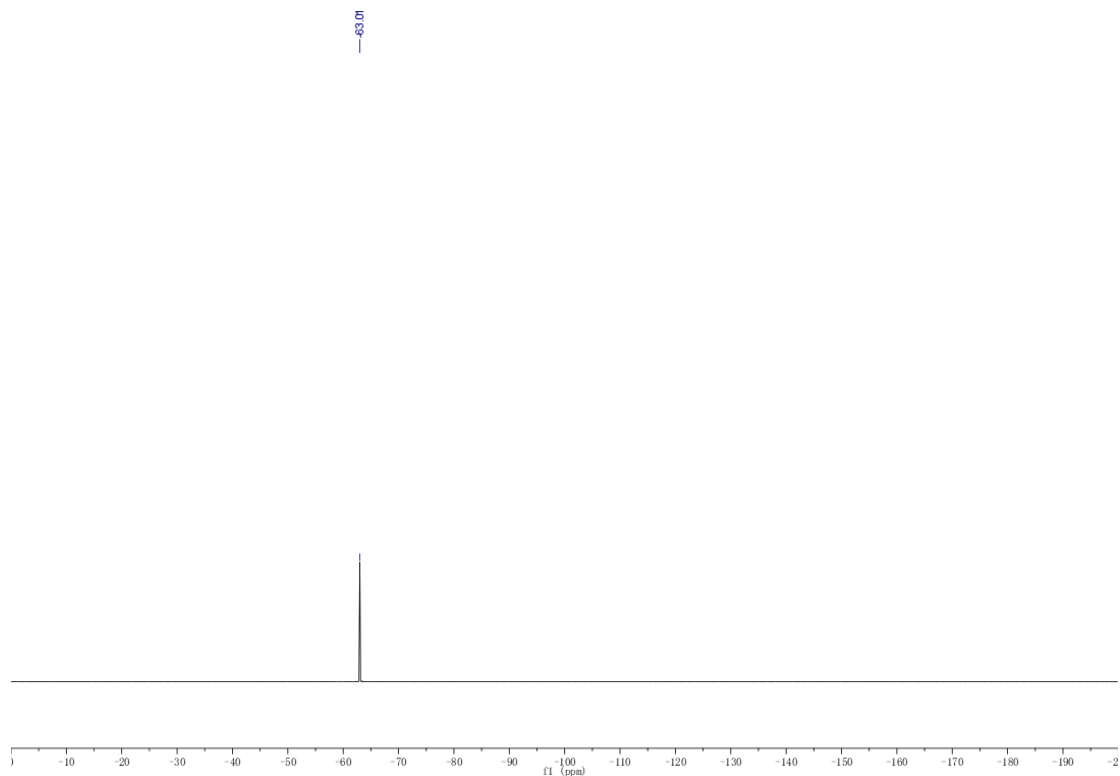

<sup>19</sup>F NMR of compound **12** (471 MHz, CDCl<sub>3</sub>)

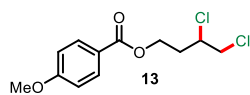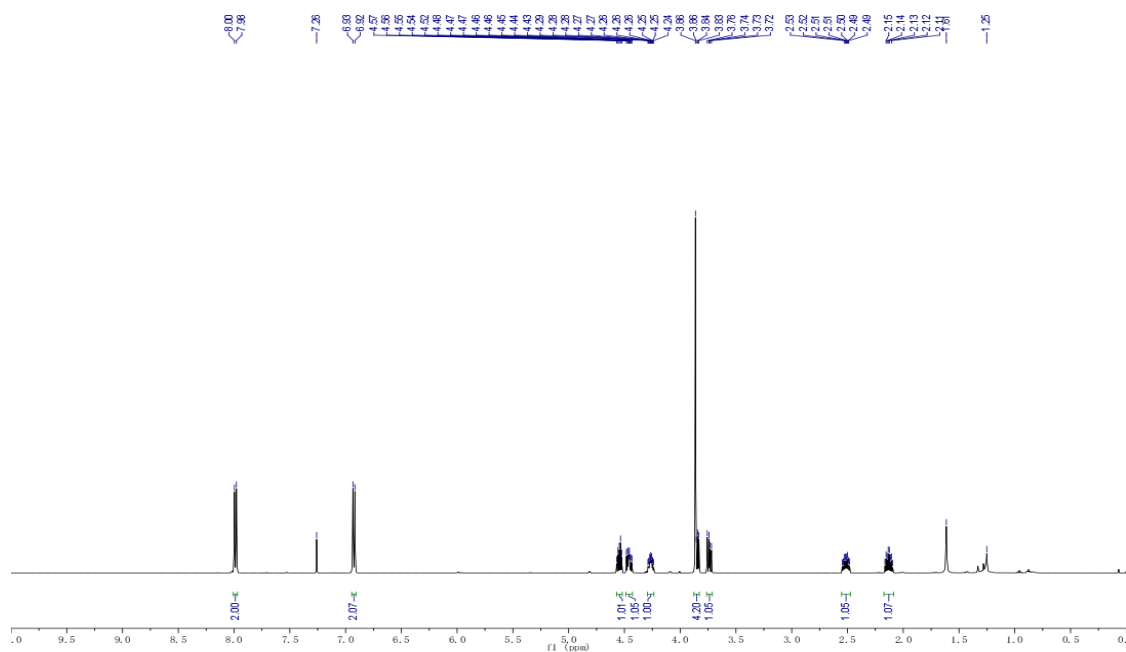

<sup>1</sup>H NMR of compound **13** (500 MHz, CDCl<sub>3</sub>)

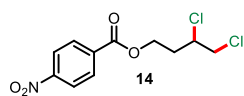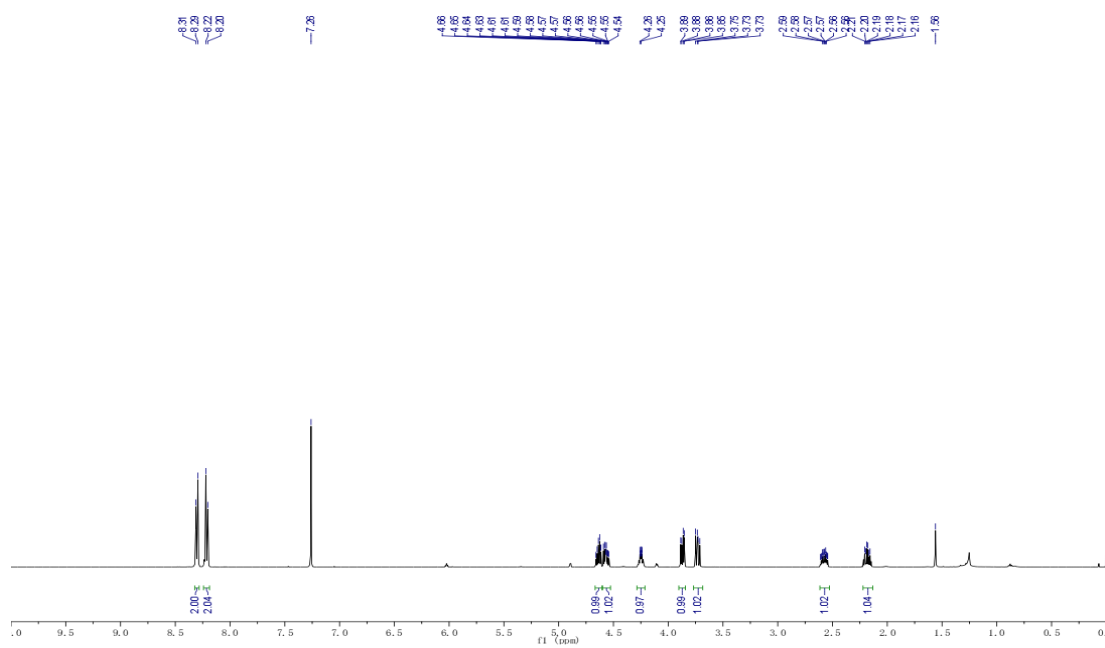

<sup>1</sup>H NMR of compound **14** (500 MHz, CDCl<sub>3</sub>)

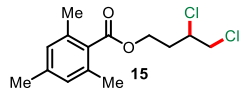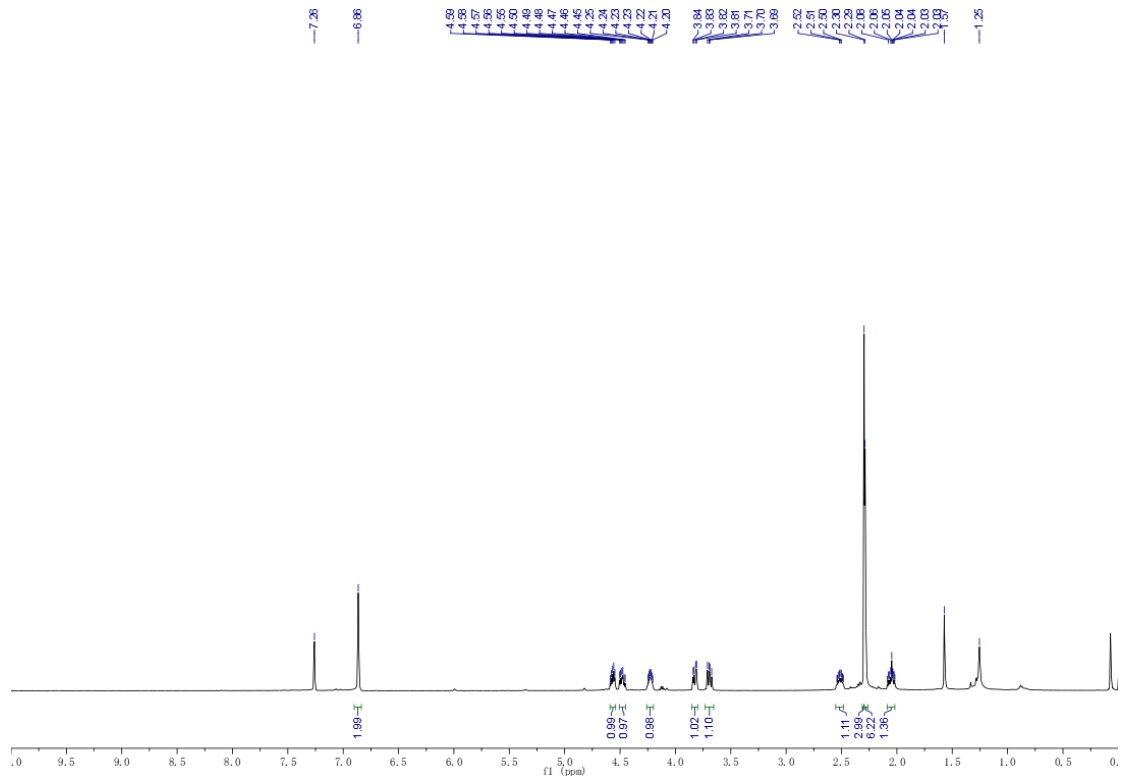

$^1\text{H}$  NMR of compound **15** (500 MHz,  $\text{CDCl}_3$ )

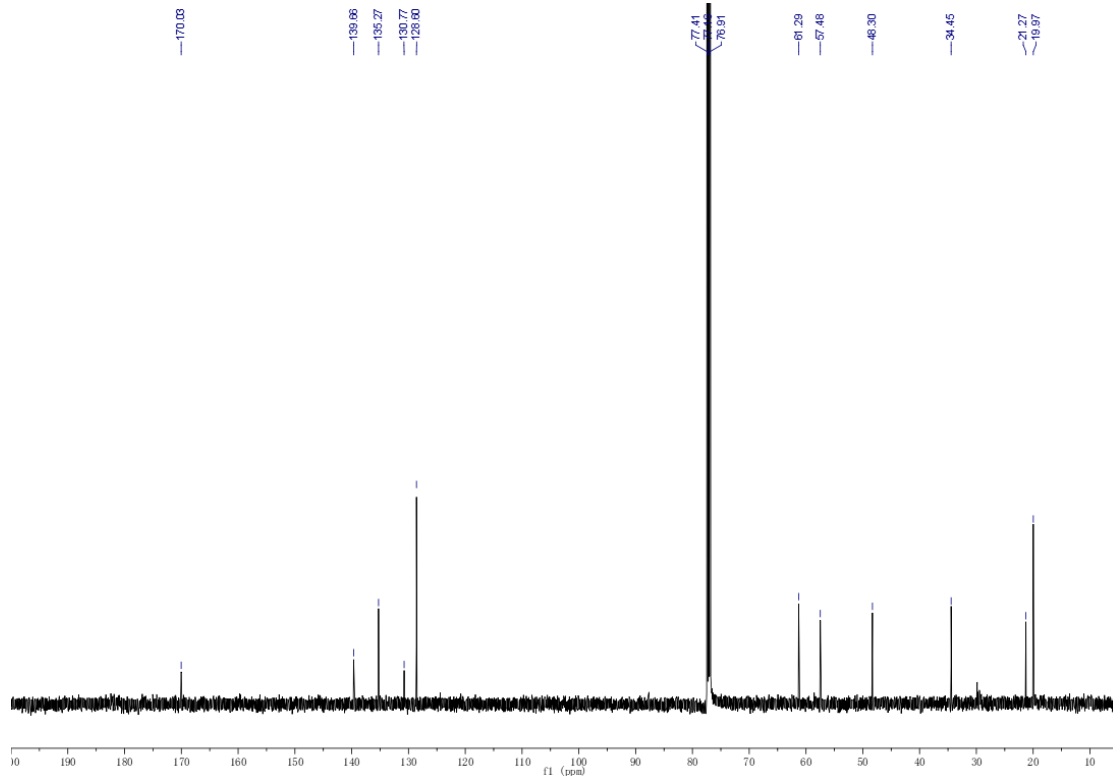

$^{13}\text{C}$  NMR of compound **15** (126 MHz,  $\text{CDCl}_3$ )

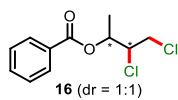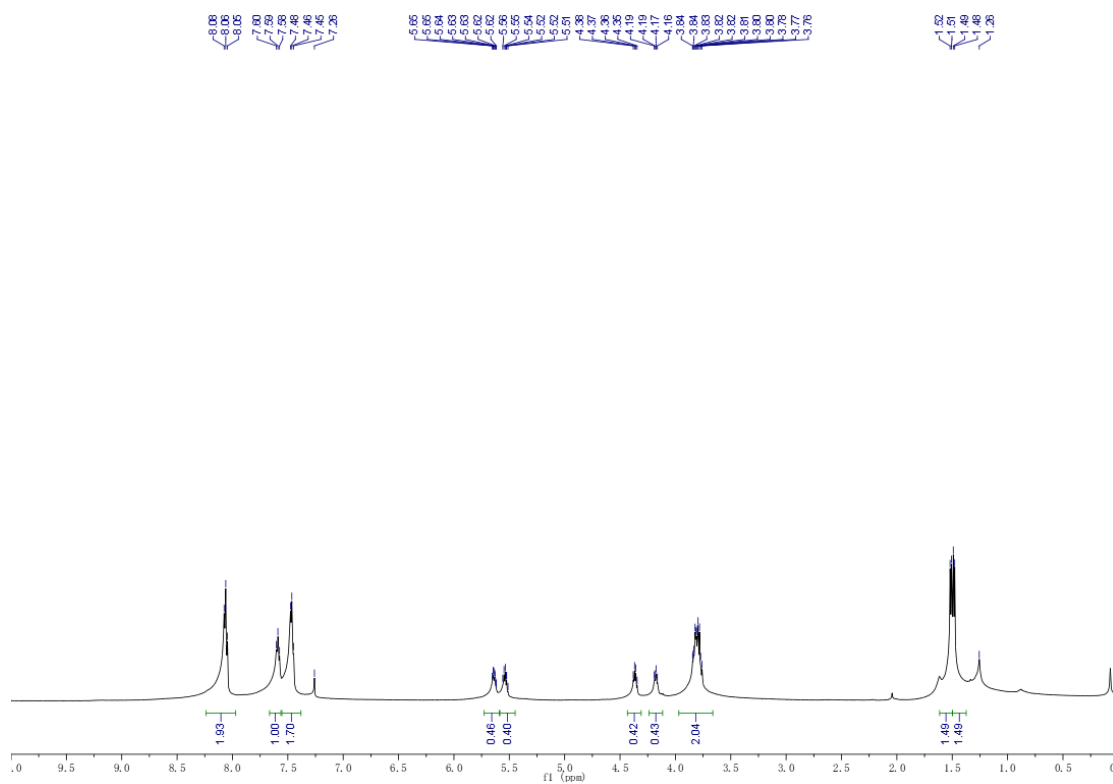

<sup>1</sup>H NMR of compound **16** (500 MHz, CDCl<sub>3</sub>)

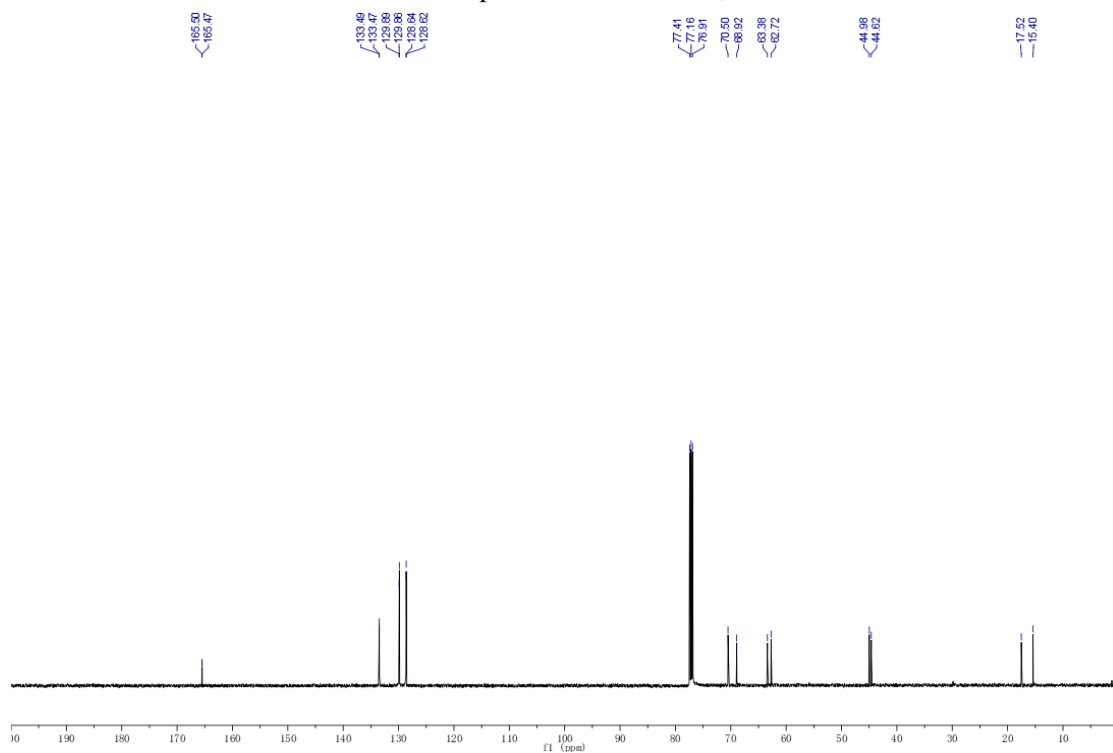

<sup>13</sup>C NMR of compound **16** (126 MHz, CDCl<sub>3</sub>)

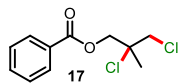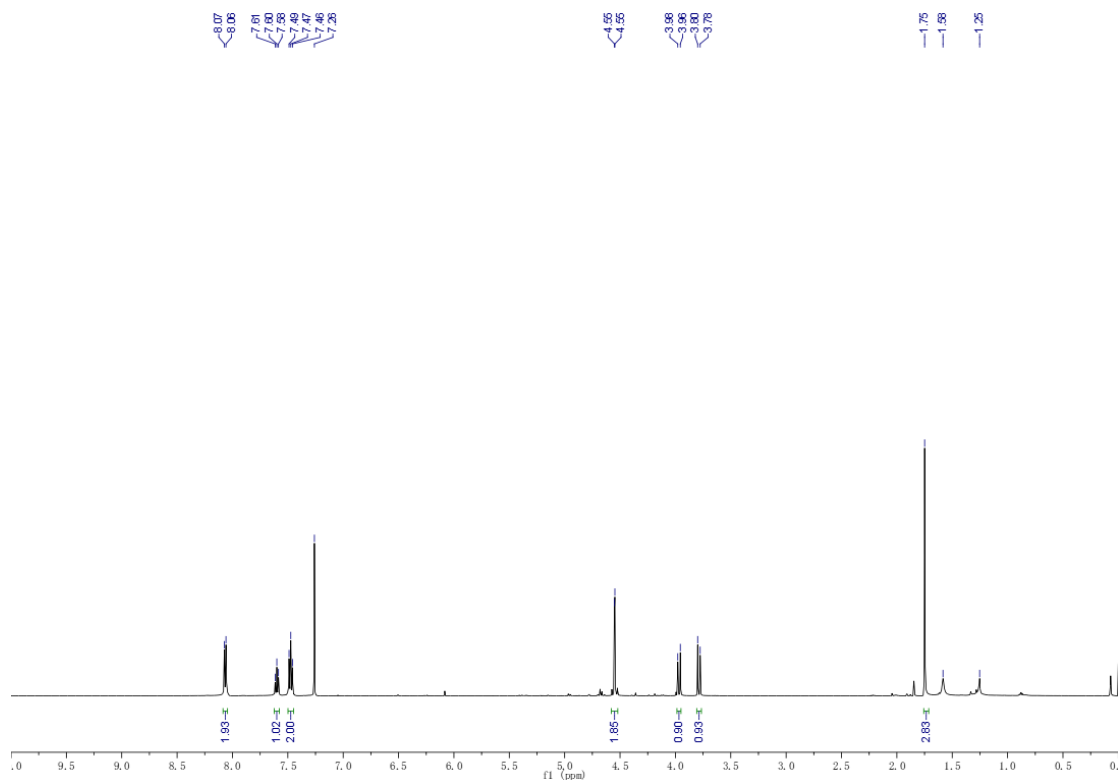

$^1\text{H}$  NMR of compound **17** (500 MHz,  $\text{CDCl}_3$ )

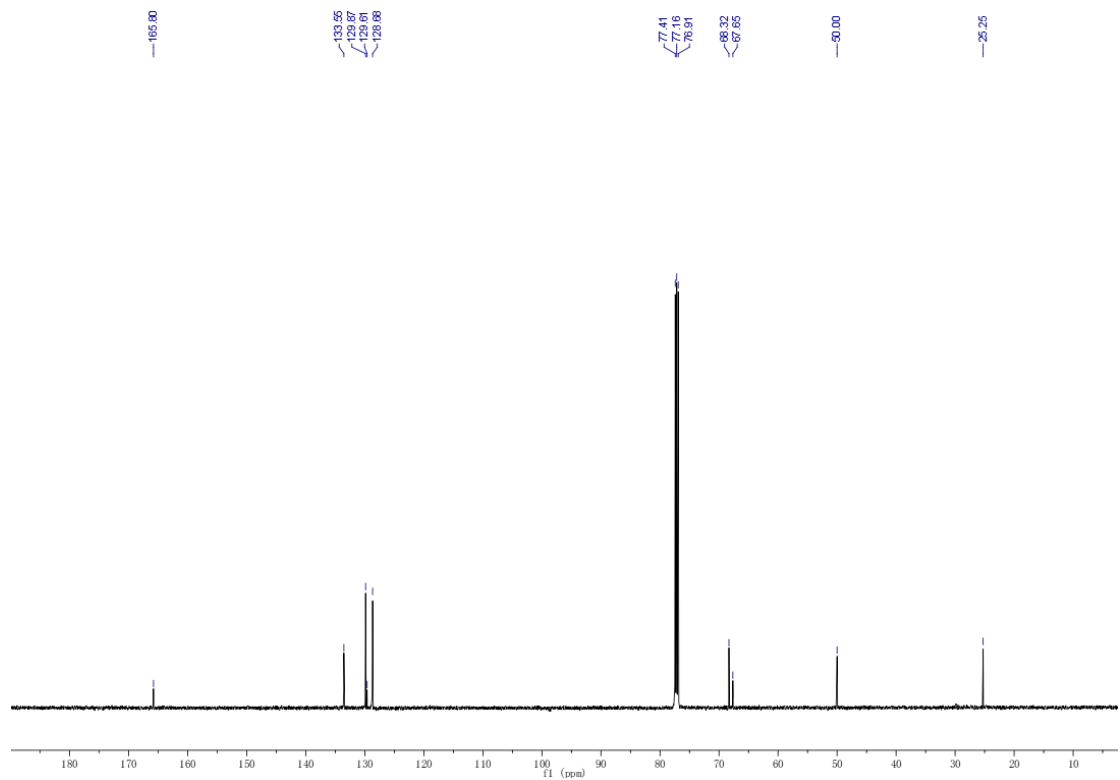

$^{13}\text{C}$  NMR of compound **17** (126 MHz,  $\text{CDCl}_3$ )



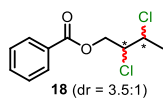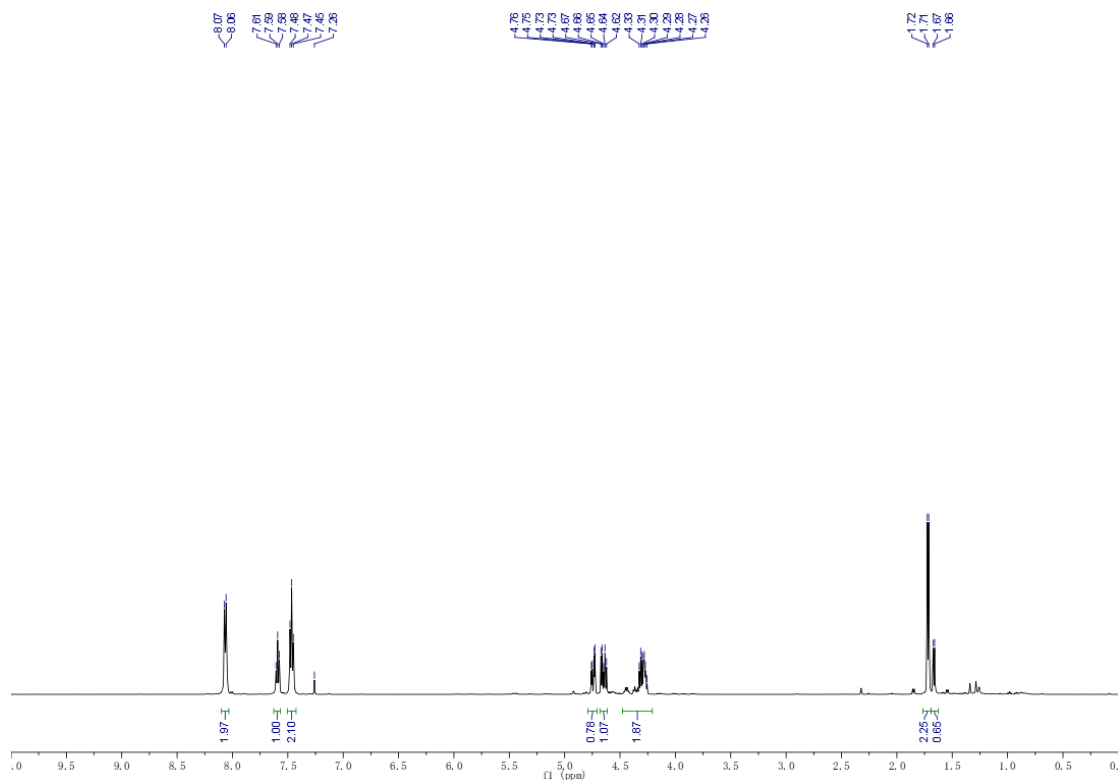

<sup>1</sup>H NMR of compound **18** (500 MHz, CDCl<sub>3</sub>)

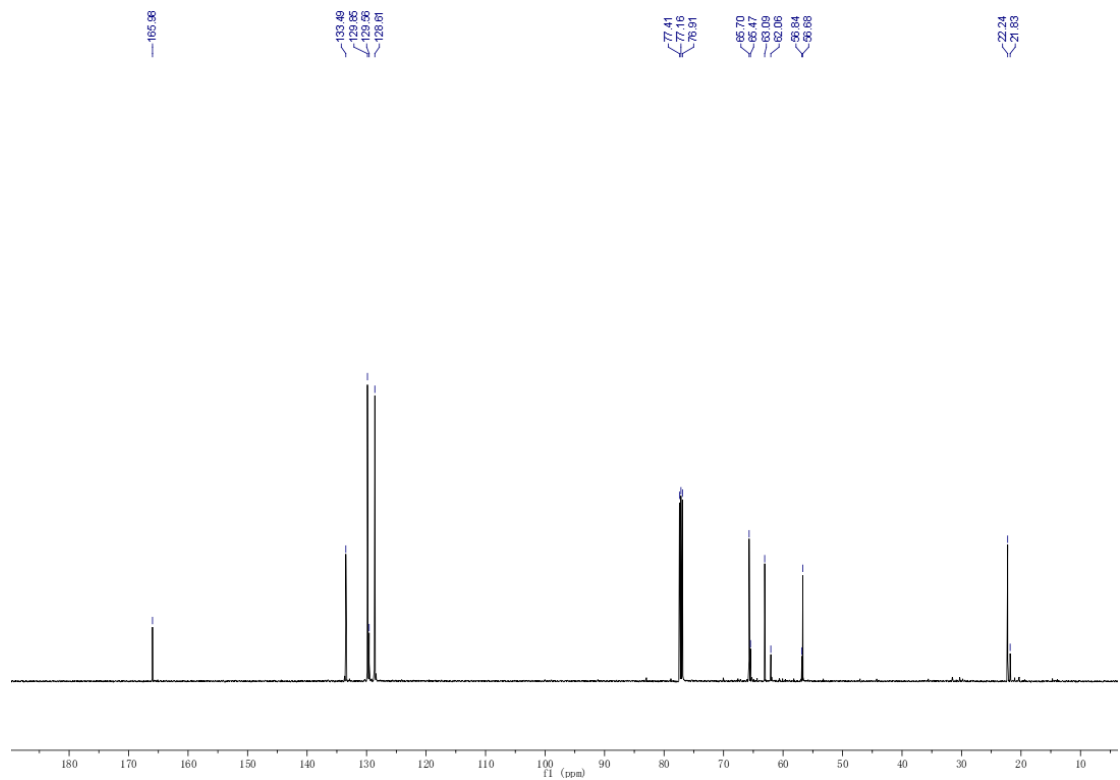

<sup>13</sup>C NMR of compound **18** (126 MHz, CDCl<sub>3</sub>)

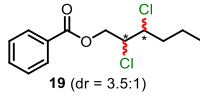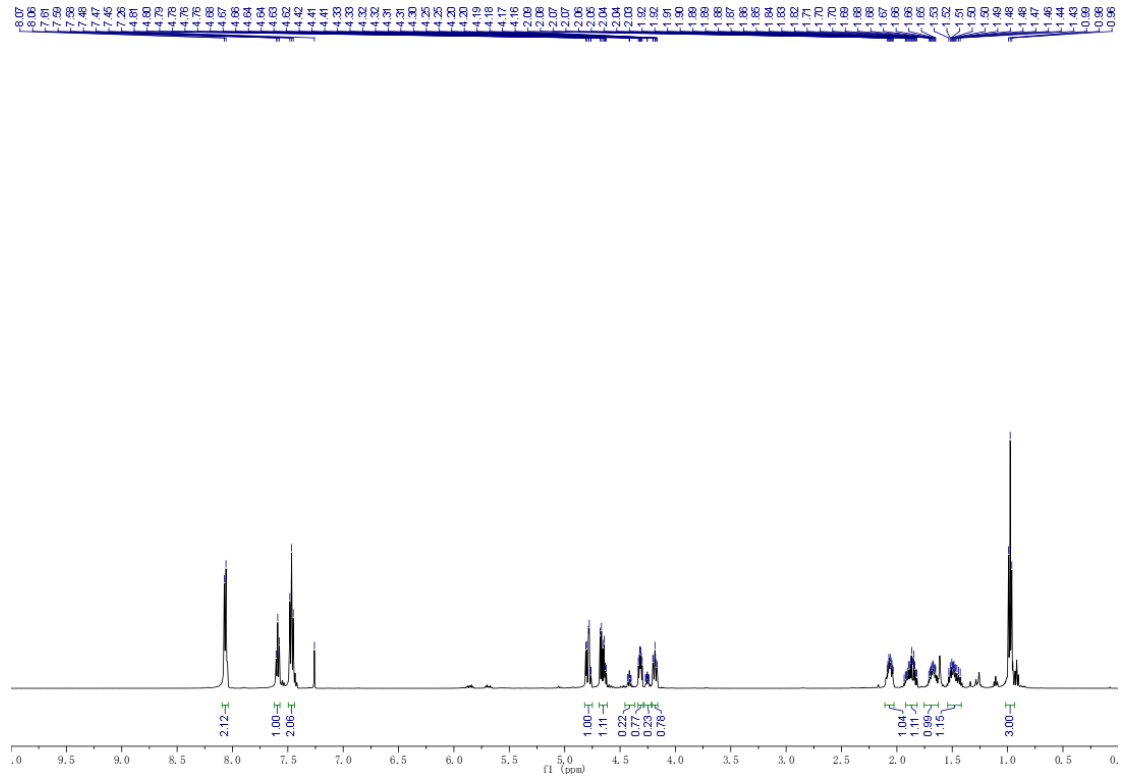

<sup>1</sup>H NMR of compound **19** (500 MHz, CDCl<sub>3</sub>)

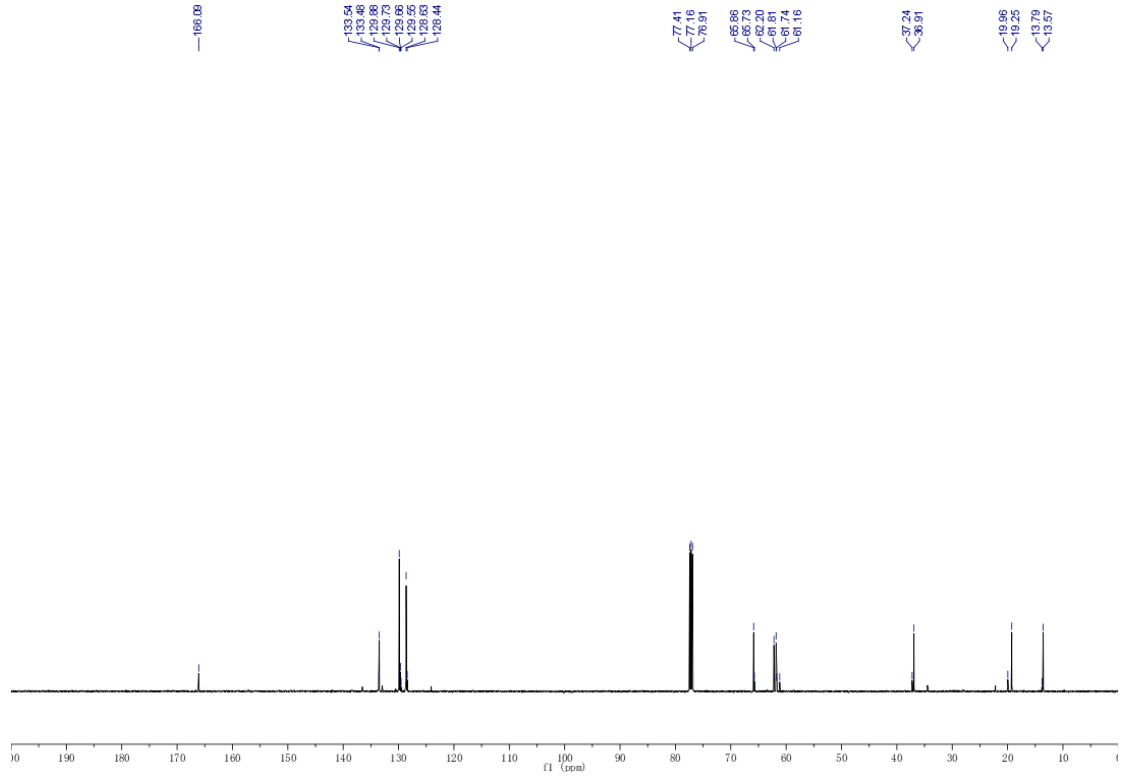

<sup>13</sup>C NMR of compound **19** (126 MHz, CDCl<sub>3</sub>)

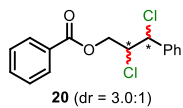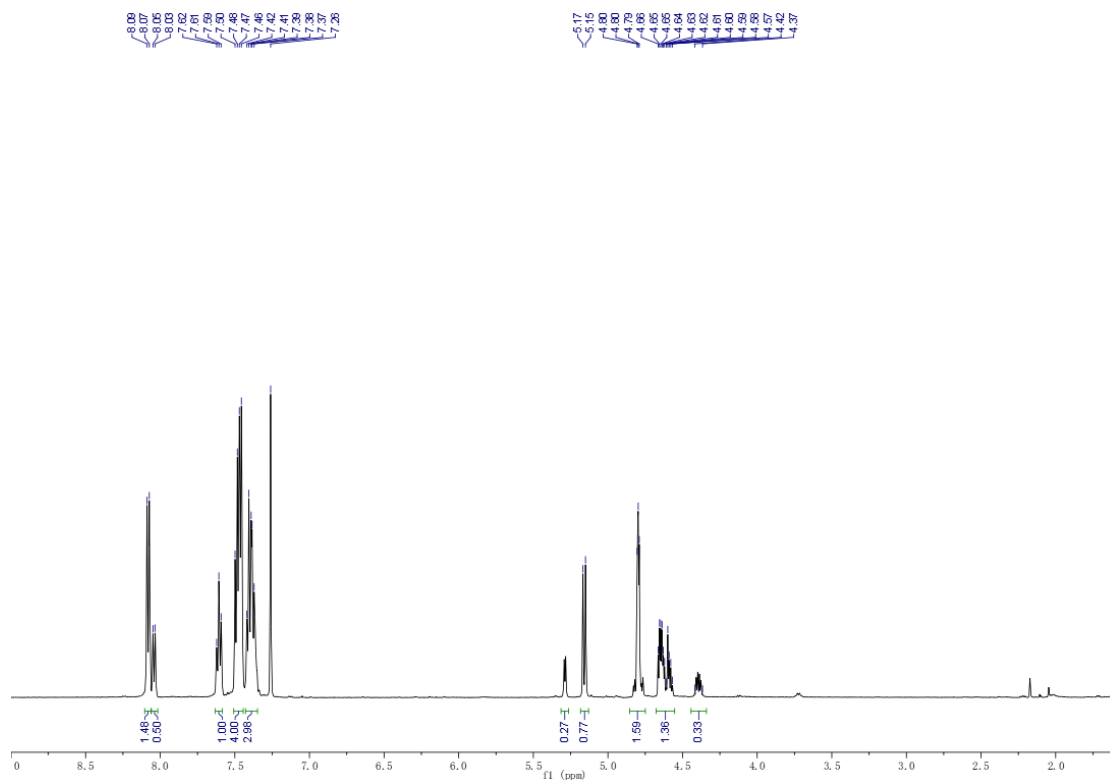

$^1\text{H}$  NMR of compound **20** (500 MHz,  $\text{CDCl}_3$ )

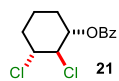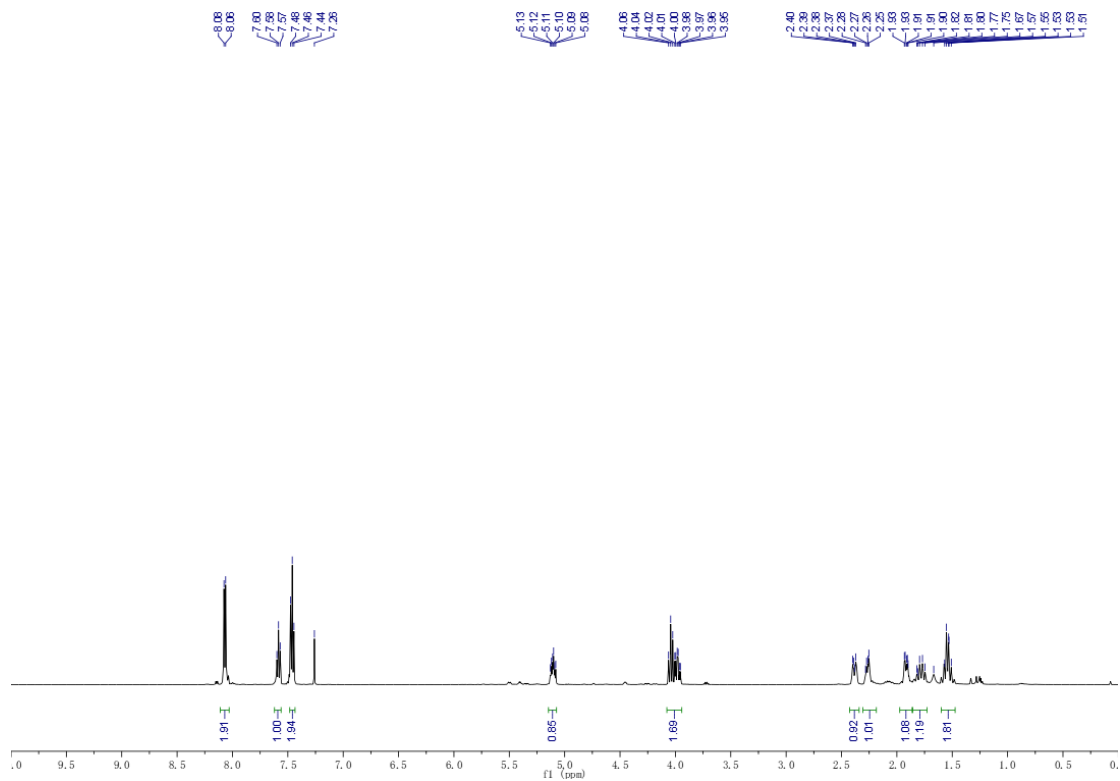

<sup>1</sup>H NMR of compound **21** (500 MHz, CDCl<sub>3</sub>)

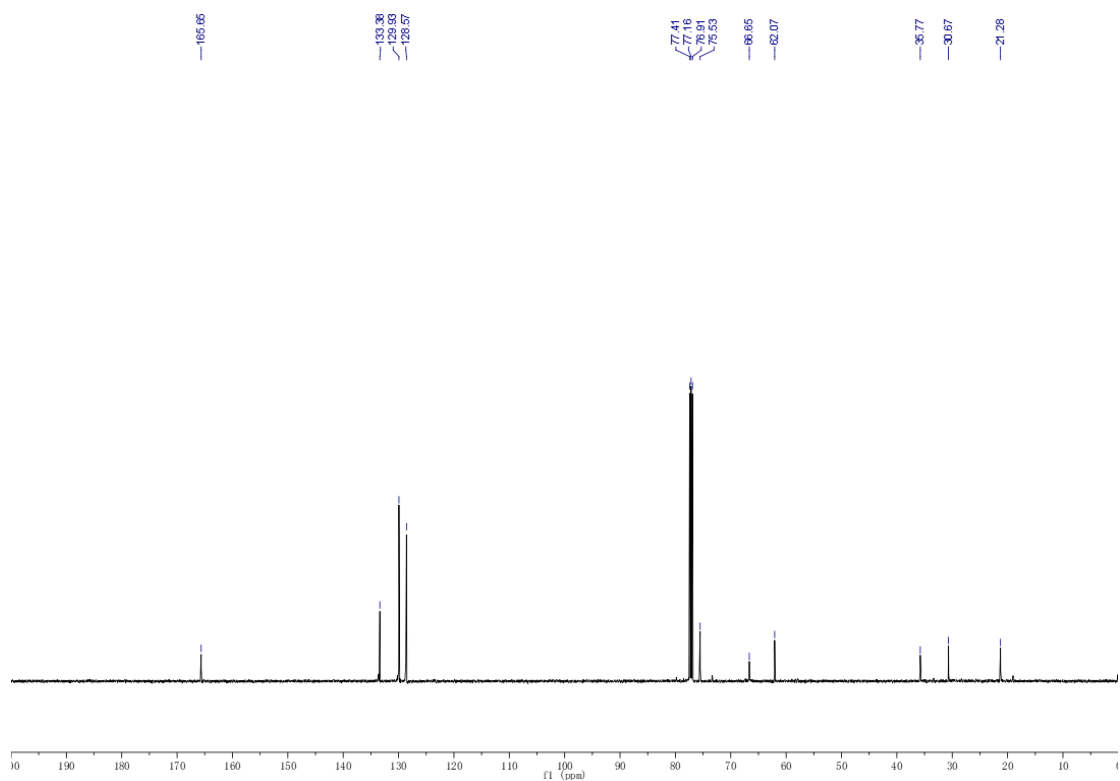

<sup>13</sup>C NMR of compound **21** (126 MHz, CDCl<sub>3</sub>)

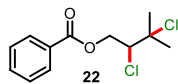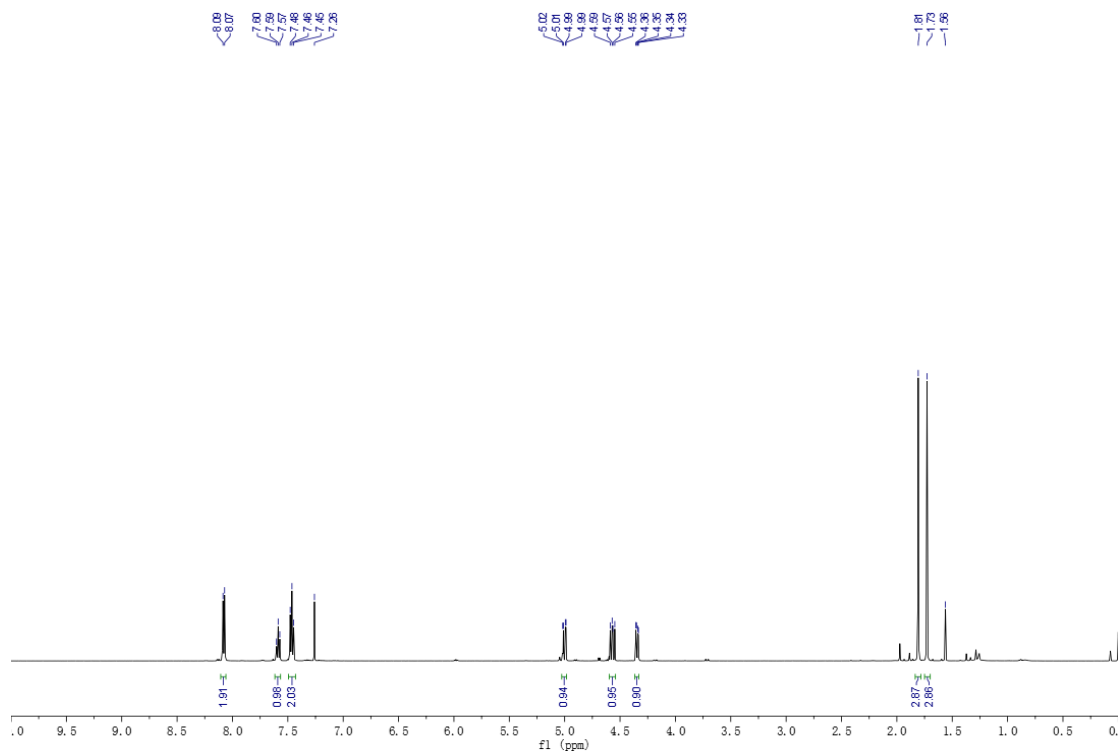

<sup>1</sup>H NMR of compound **22** (500 MHz, CDCl<sub>3</sub>)

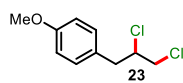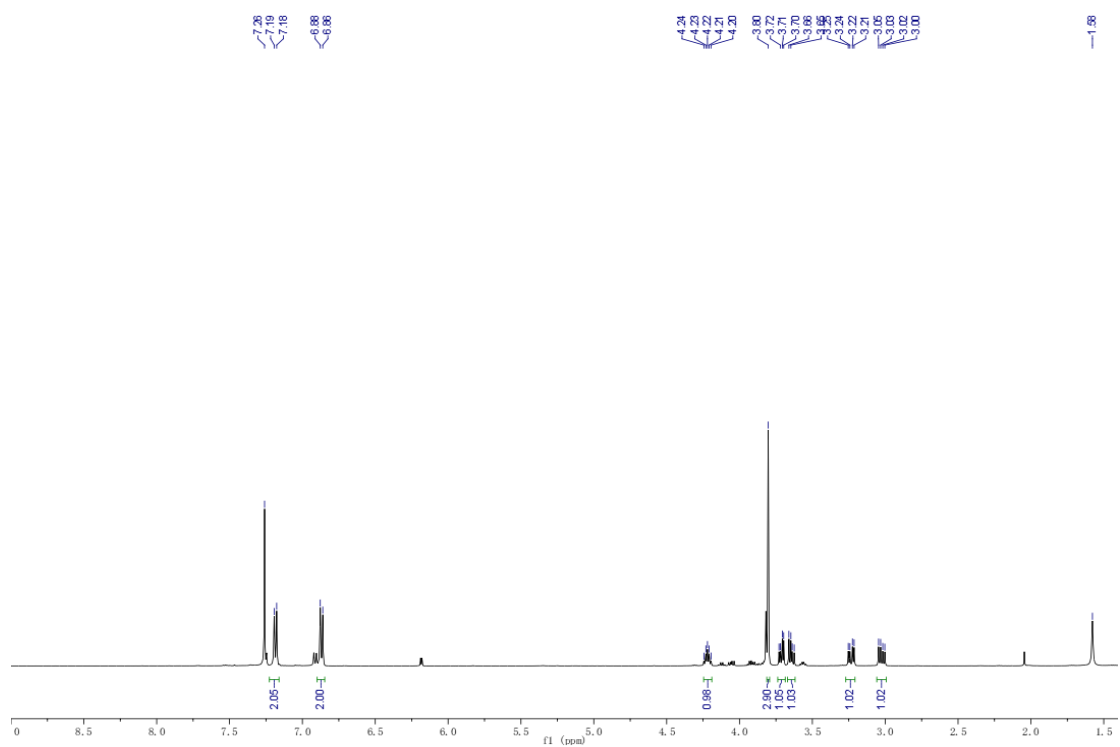

<sup>1</sup>H NMR of compound **23** (500 MHz, CDCl<sub>3</sub>)

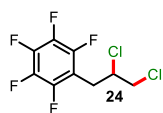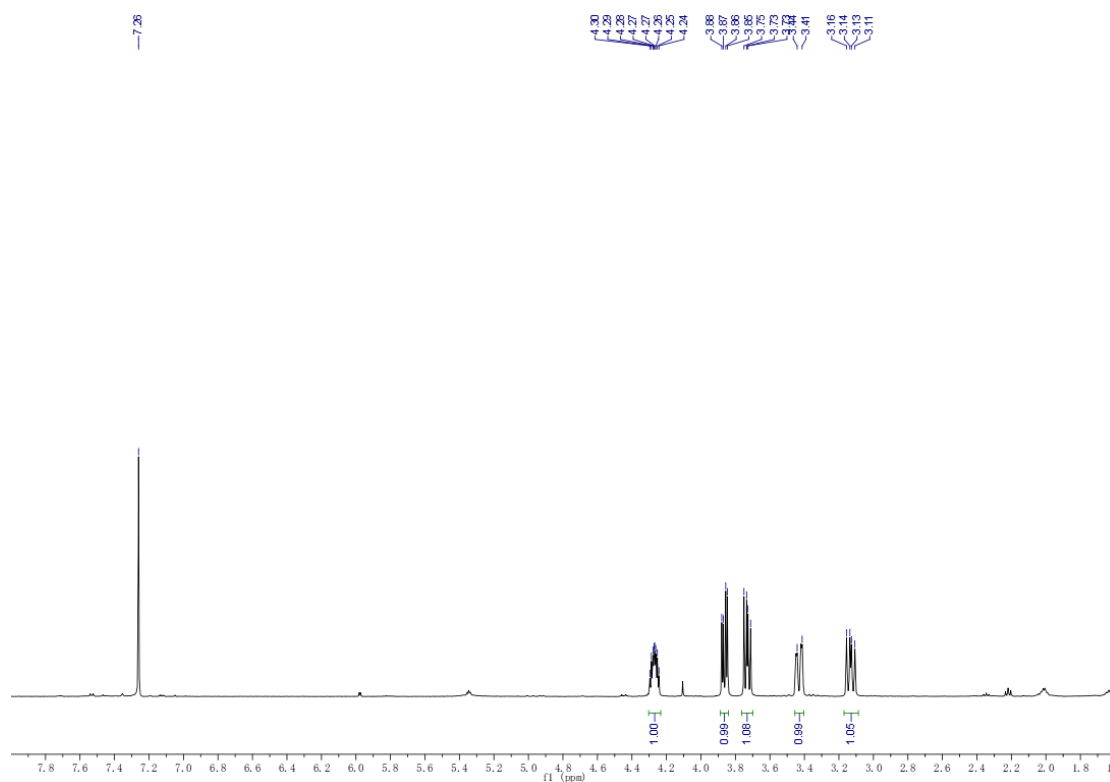

$^1\text{H}$  NMR of compound **24** (500 MHz,  $\text{CDCl}_3$ )

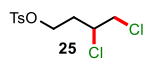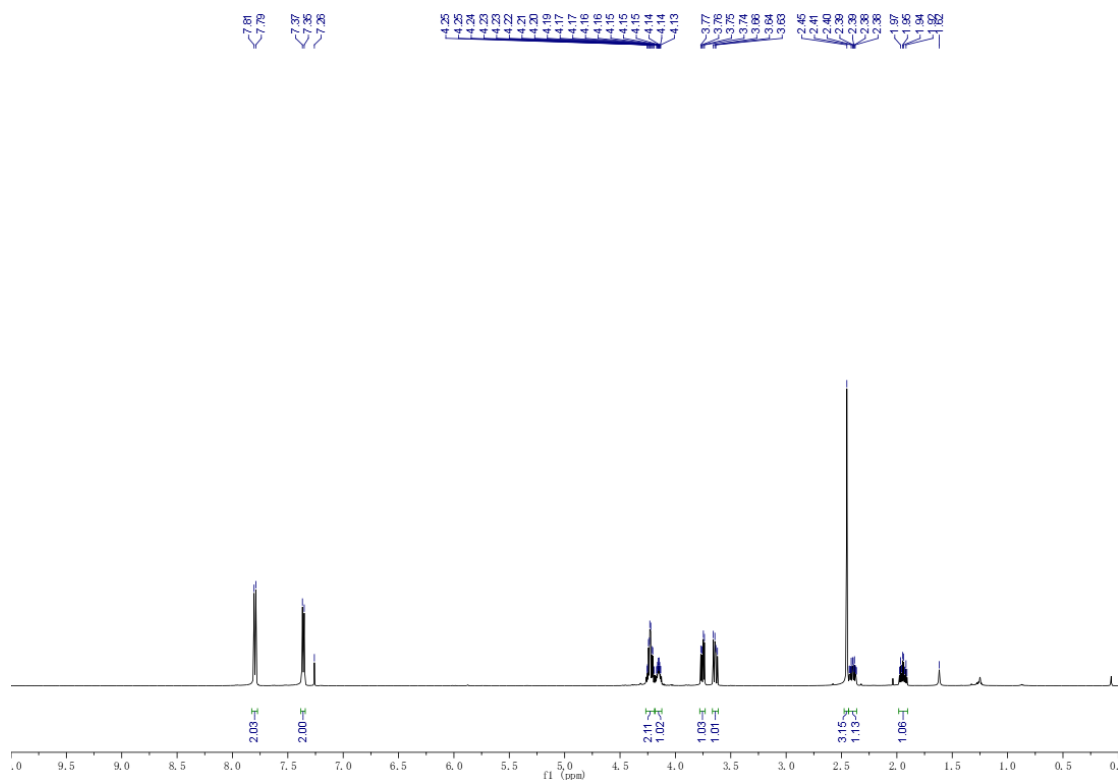

<sup>1</sup>H NMR of compound **25** (500 MHz, CDCl<sub>3</sub>)

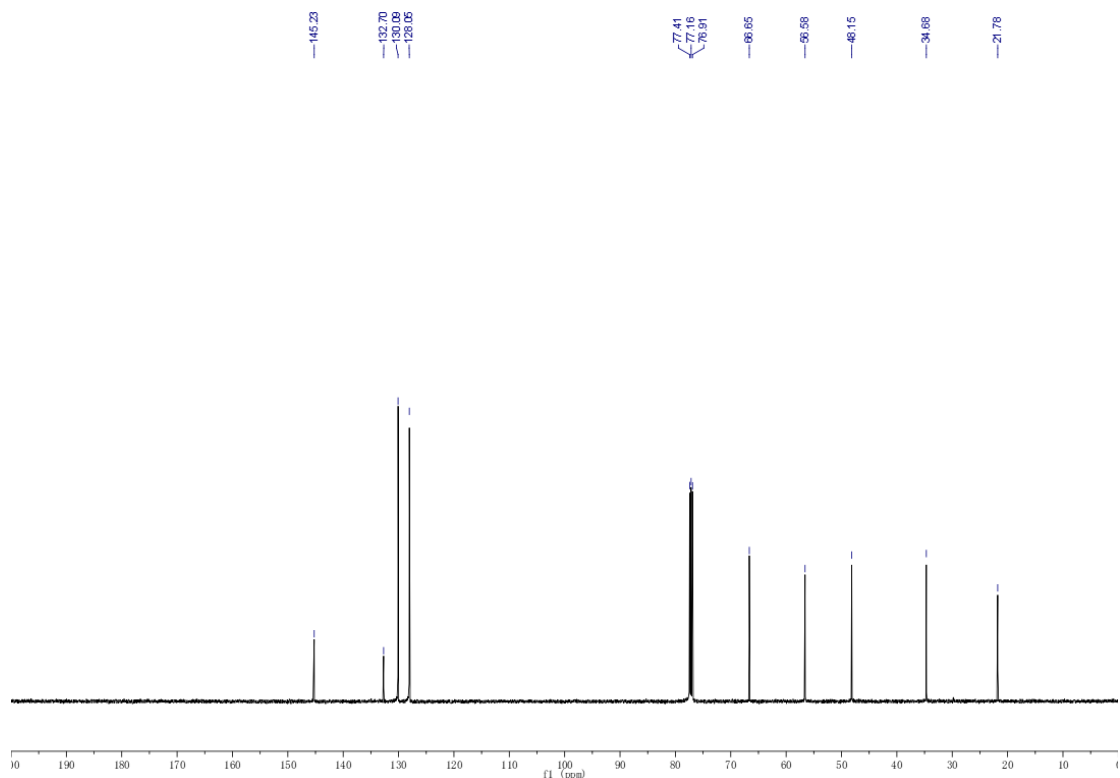

<sup>13</sup>C NMR of compound **25** (126 MHz, CDCl<sub>3</sub>)

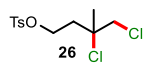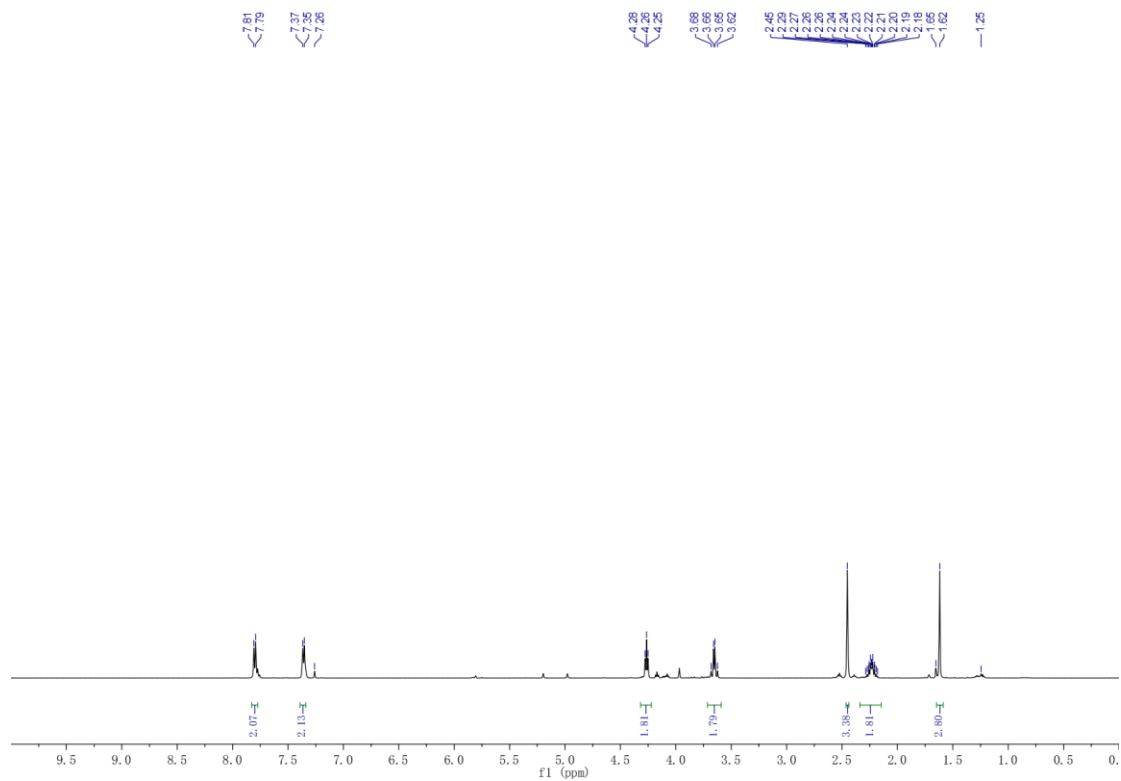

<sup>1</sup>H NMR of compound **26** (500 MHz, CDCl<sub>3</sub>)

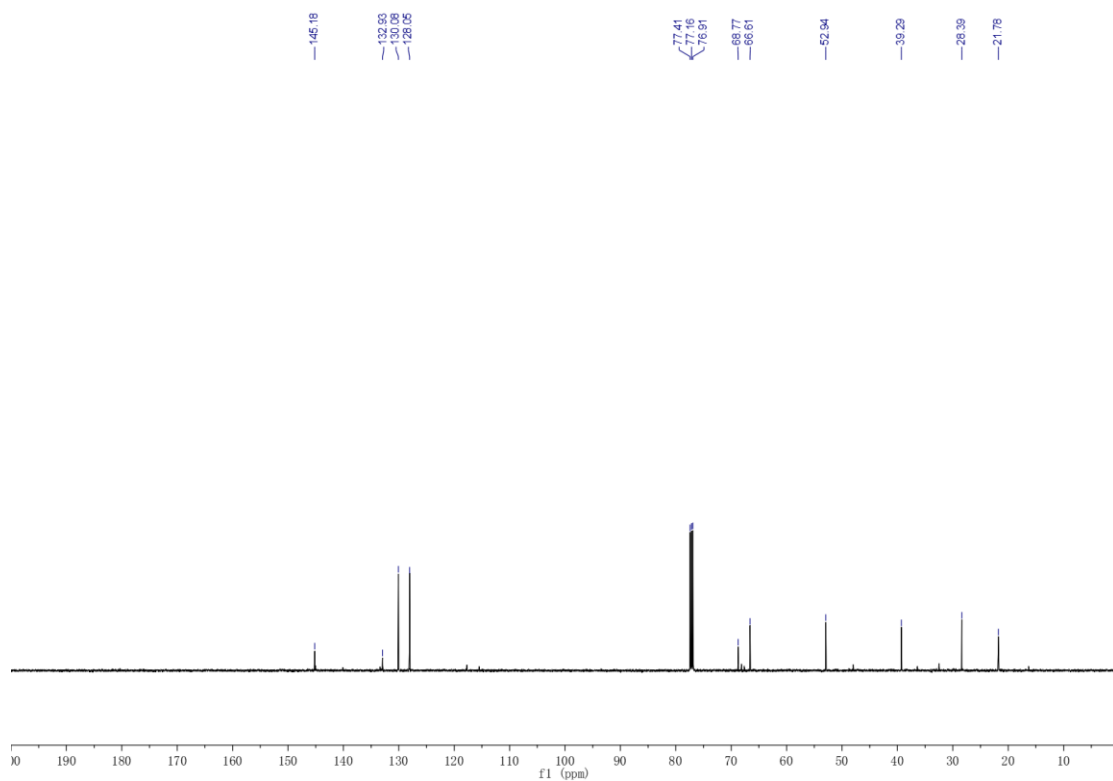

<sup>13</sup>C NMR of compound **26** (126 MHz, CDCl<sub>3</sub>)



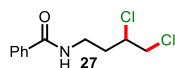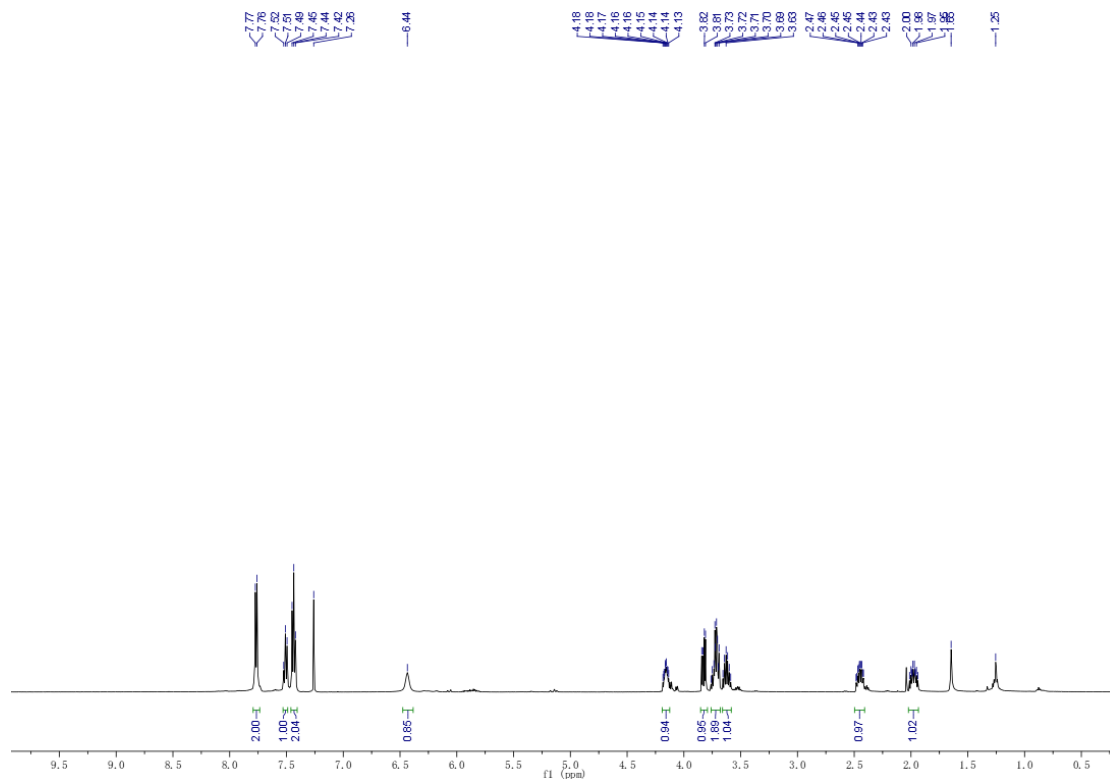

<sup>1</sup>H NMR of compound 27 (500 MHz, CDCl<sub>3</sub>)

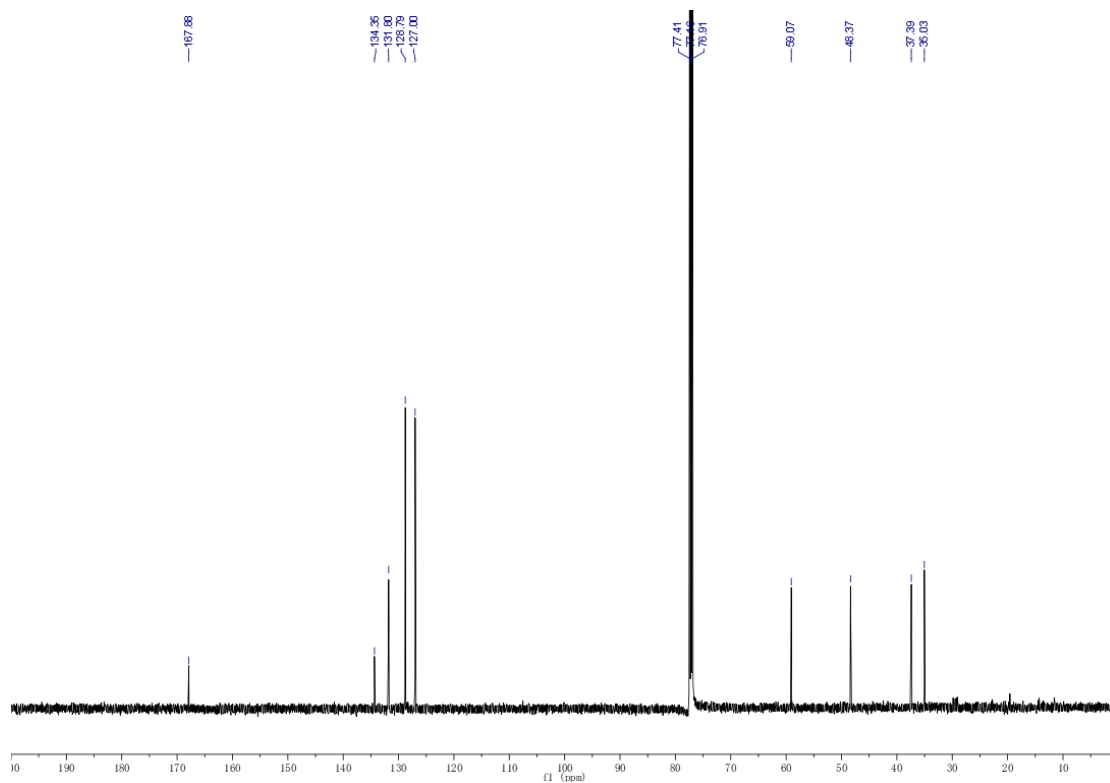

<sup>13</sup>C NMR of compound 27 (126 MHz, CDCl<sub>3</sub>)

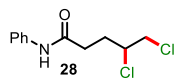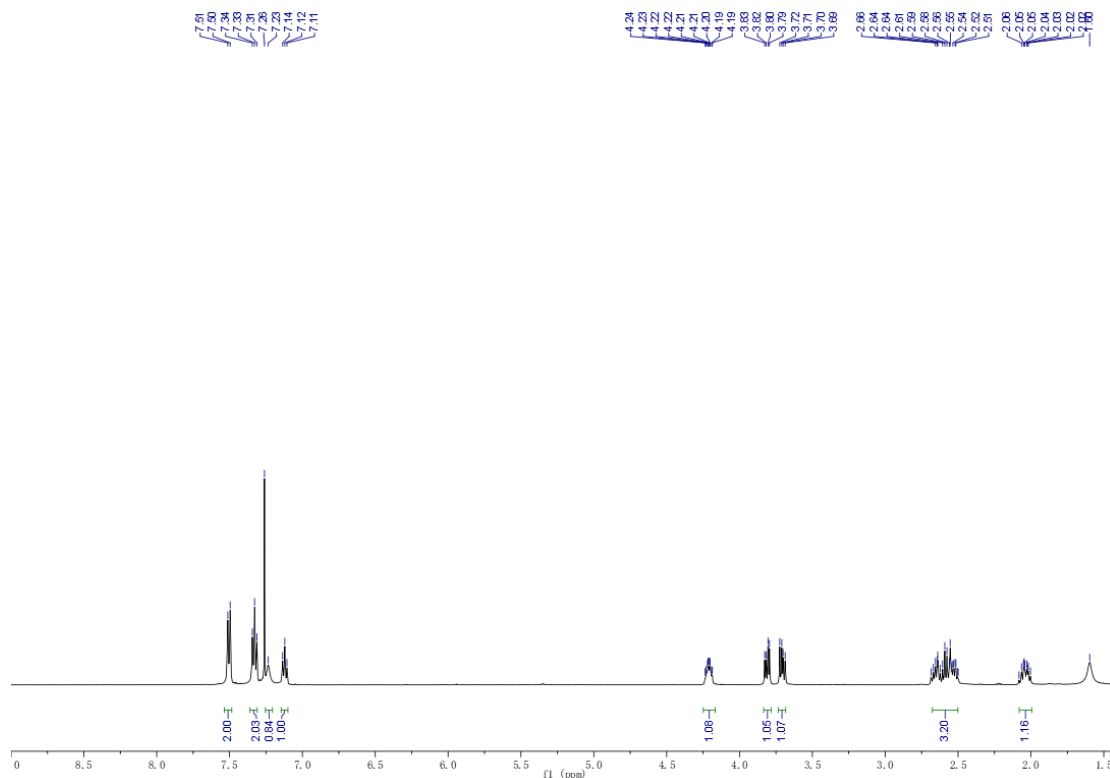

<sup>1</sup>H NMR of compound **28** (500 MHz, CDCl<sub>3</sub>)

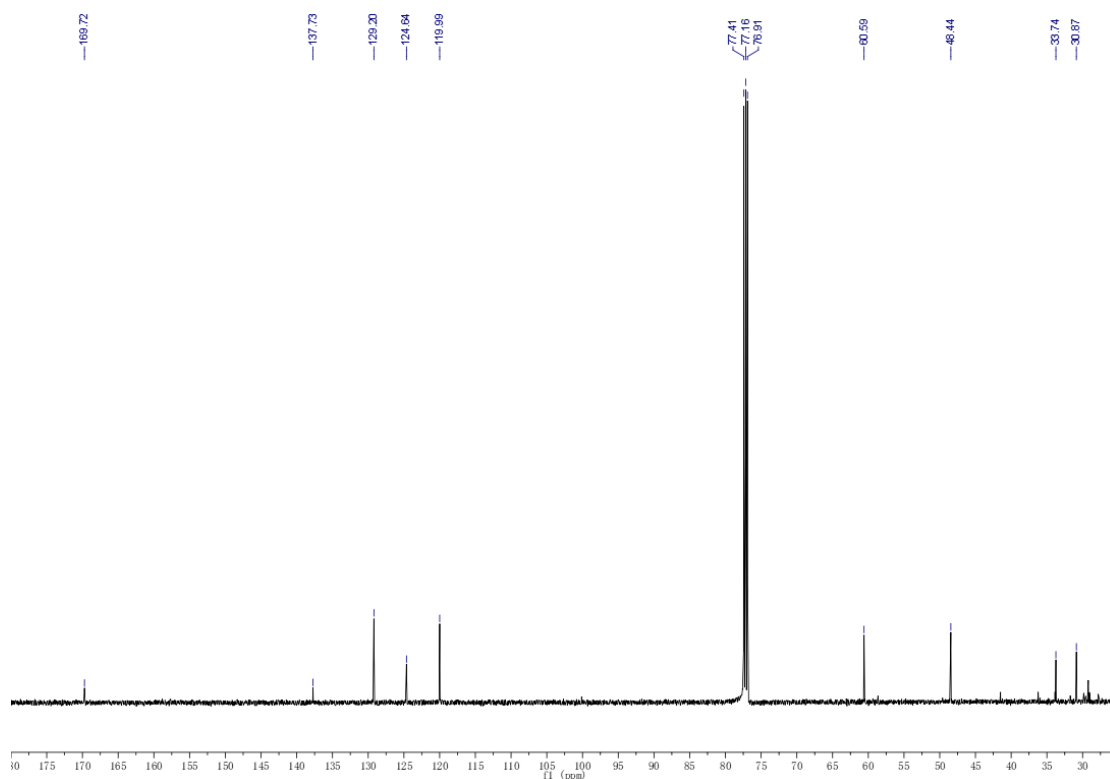

<sup>13</sup>C NMR of compound **28** (126 MHz, CDCl<sub>3</sub>)

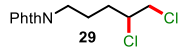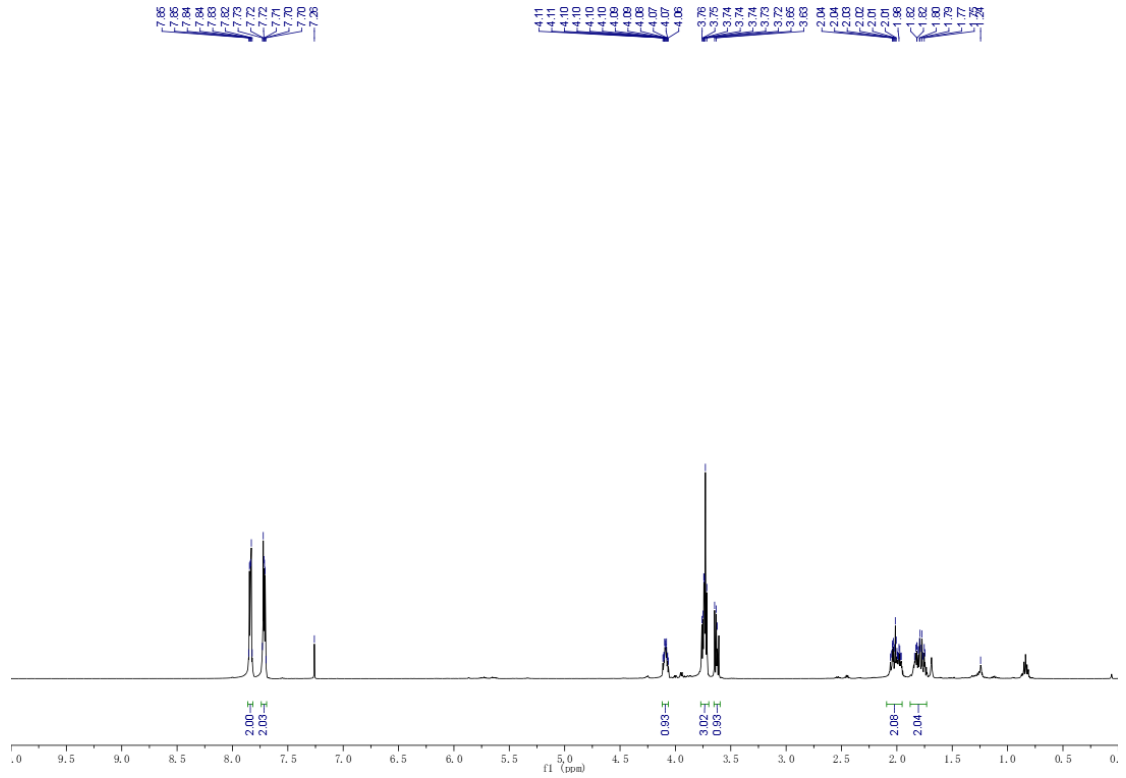

<sup>1</sup>H NMR of compound **29** (500 MHz, CDCl<sub>3</sub>)

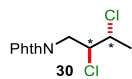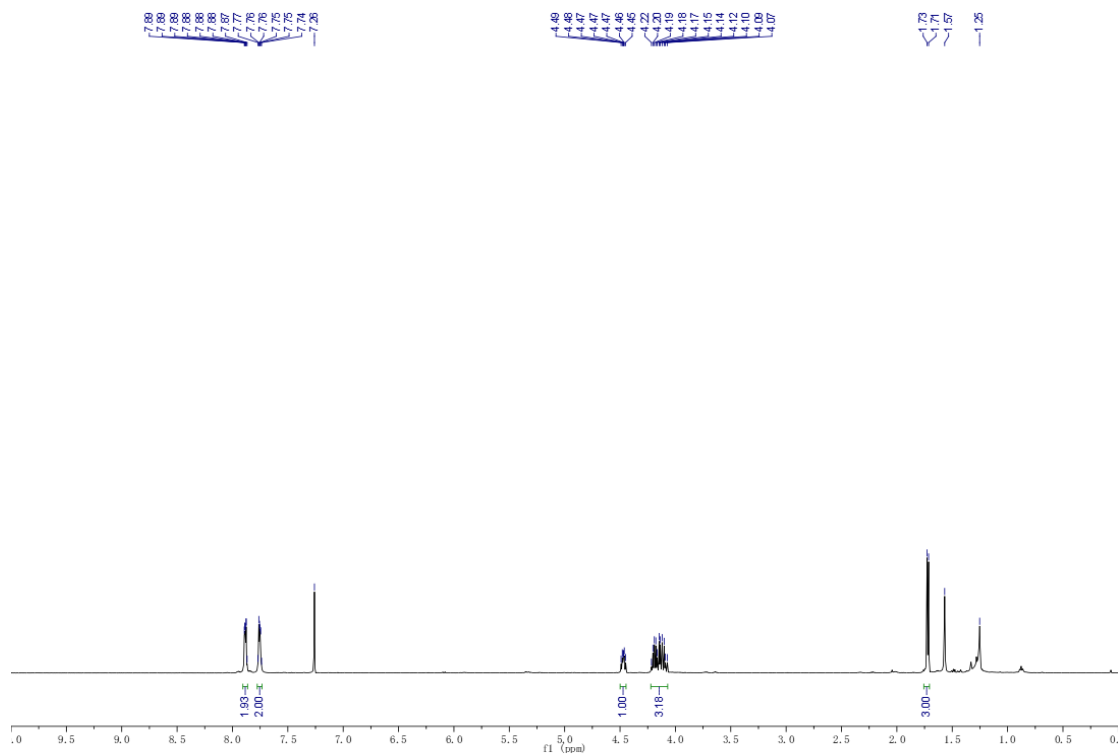

$^1\text{H}$  NMR of compound **30** (500 MHz,  $\text{CDCl}_3$ )

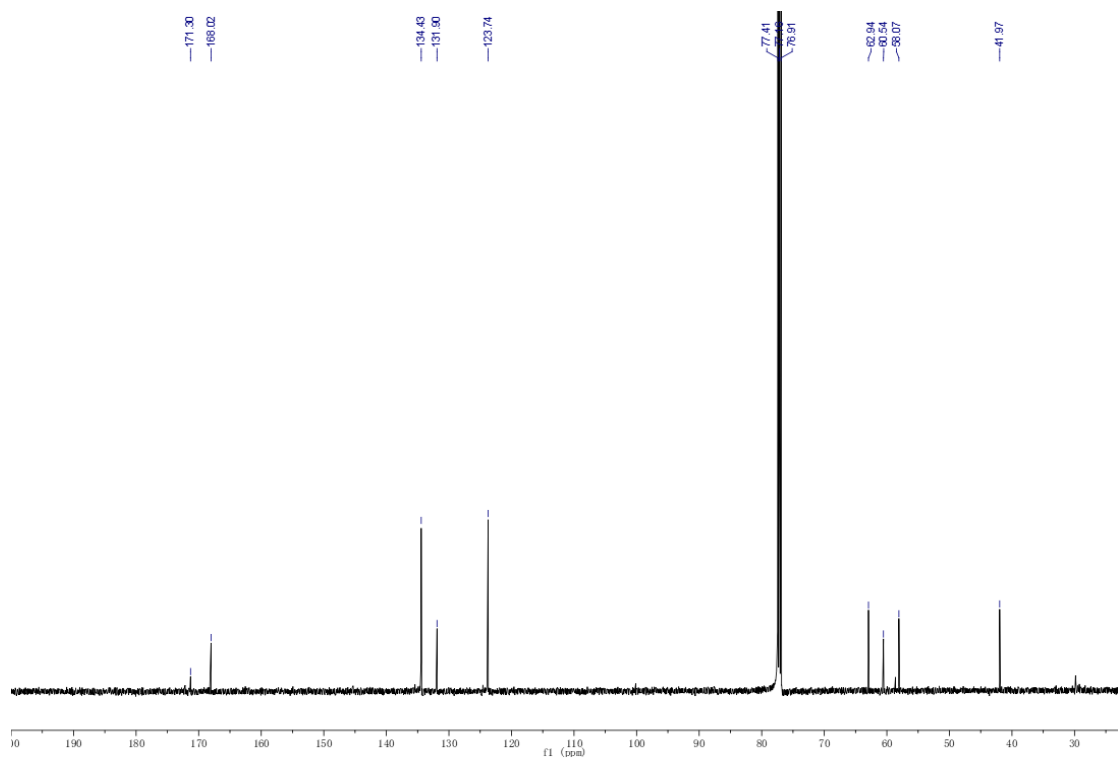

$^{13}\text{C}$  NMR of compound **30** (126 MHz,  $\text{CDCl}_3$ )

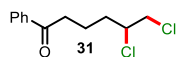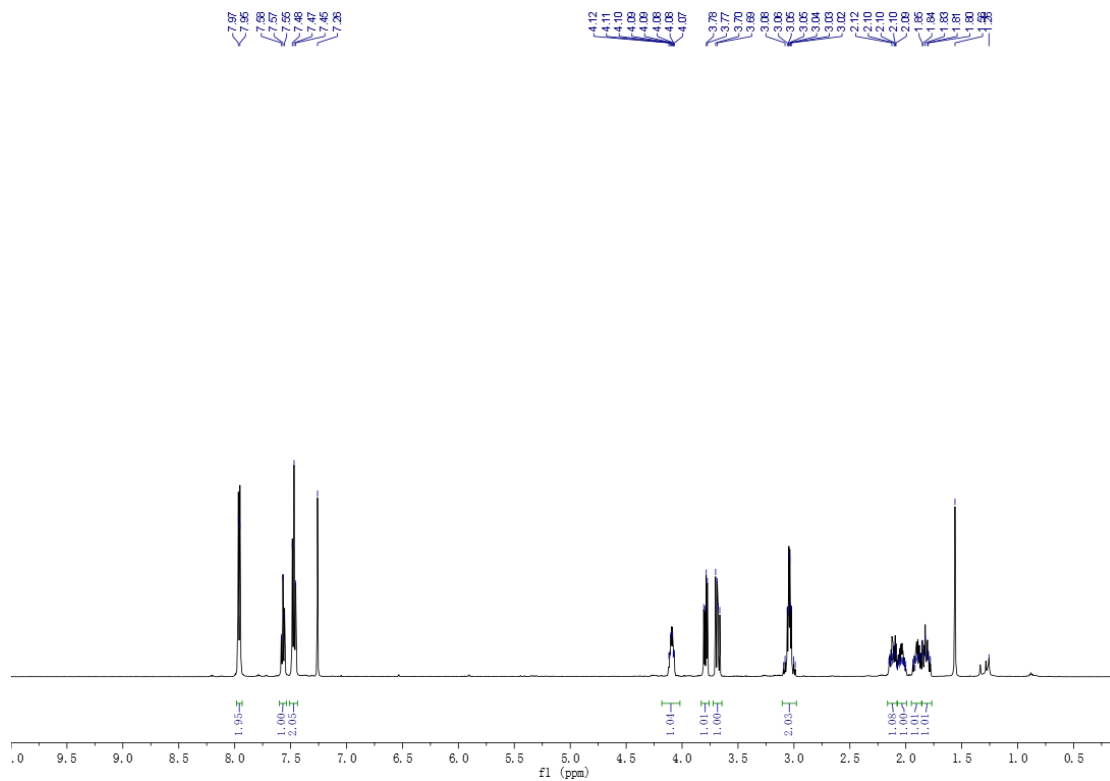

<sup>1</sup>H NMR of compound **31** (500 MHz, CDCl<sub>3</sub>)

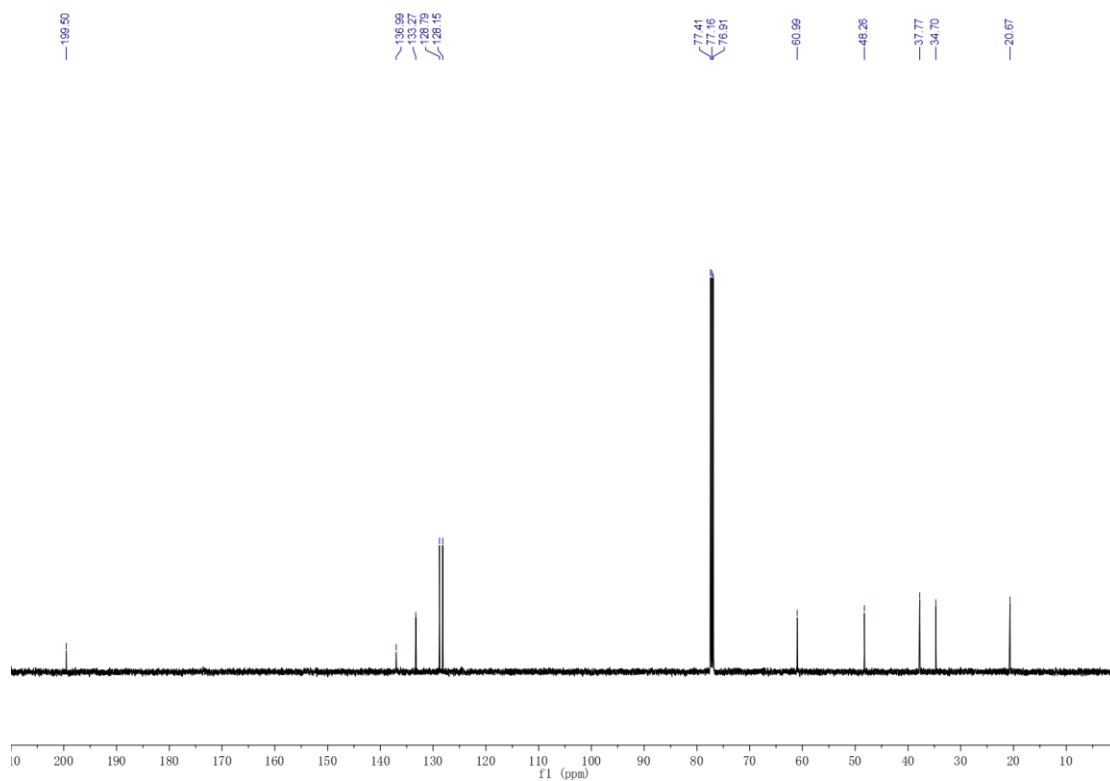

<sup>13</sup>C NMR of compound **31** (126 MHz, CDCl<sub>3</sub>)

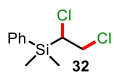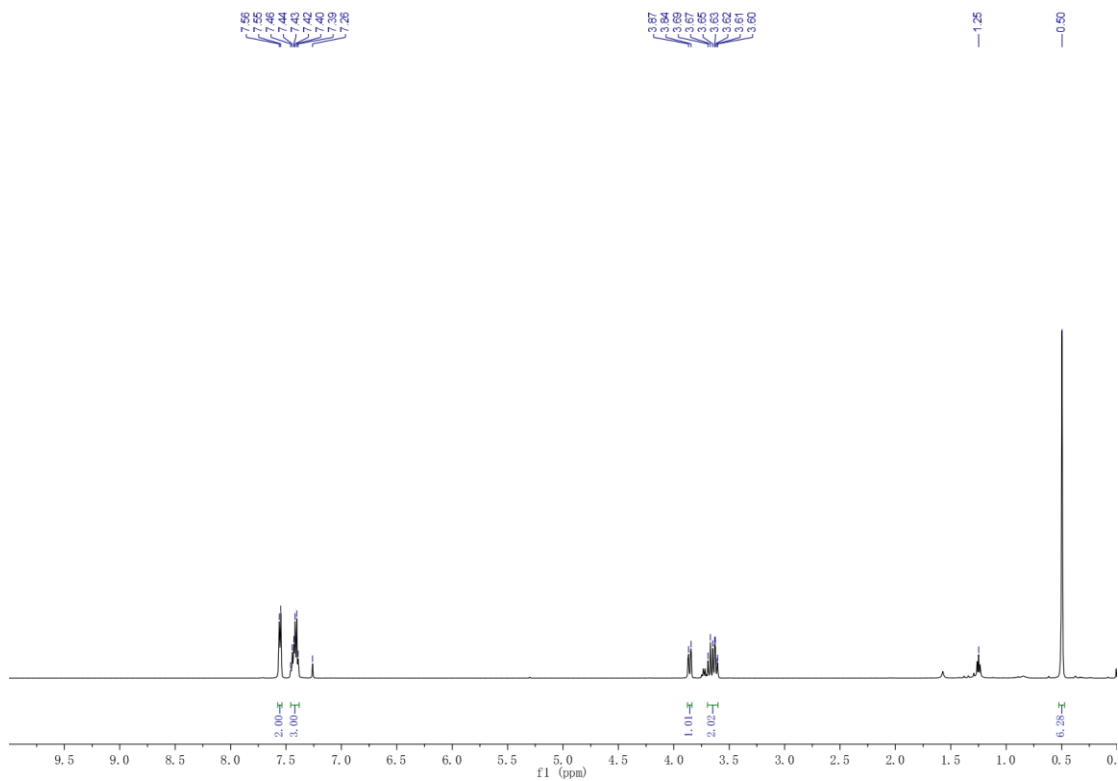

<sup>1</sup>H NMR of compound **32** (500 MHz, CDCl<sub>3</sub>)

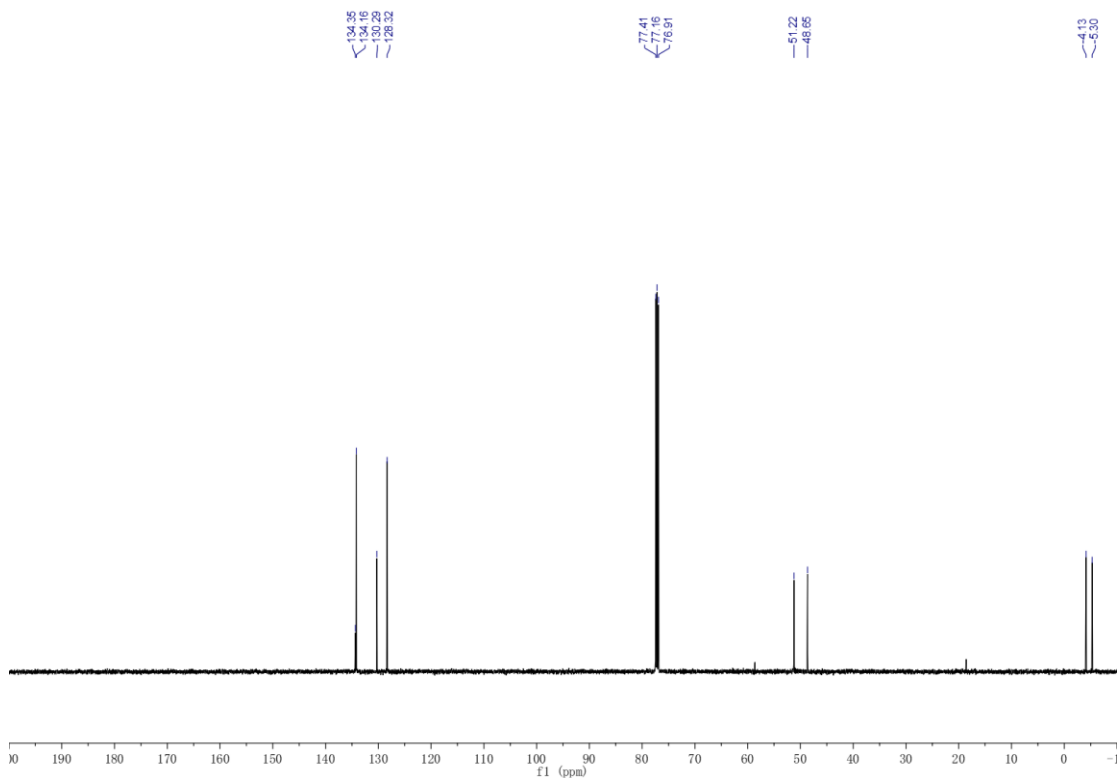

<sup>13</sup>C NMR of compound **32** (126 MHz, CDCl<sub>3</sub>)

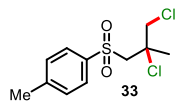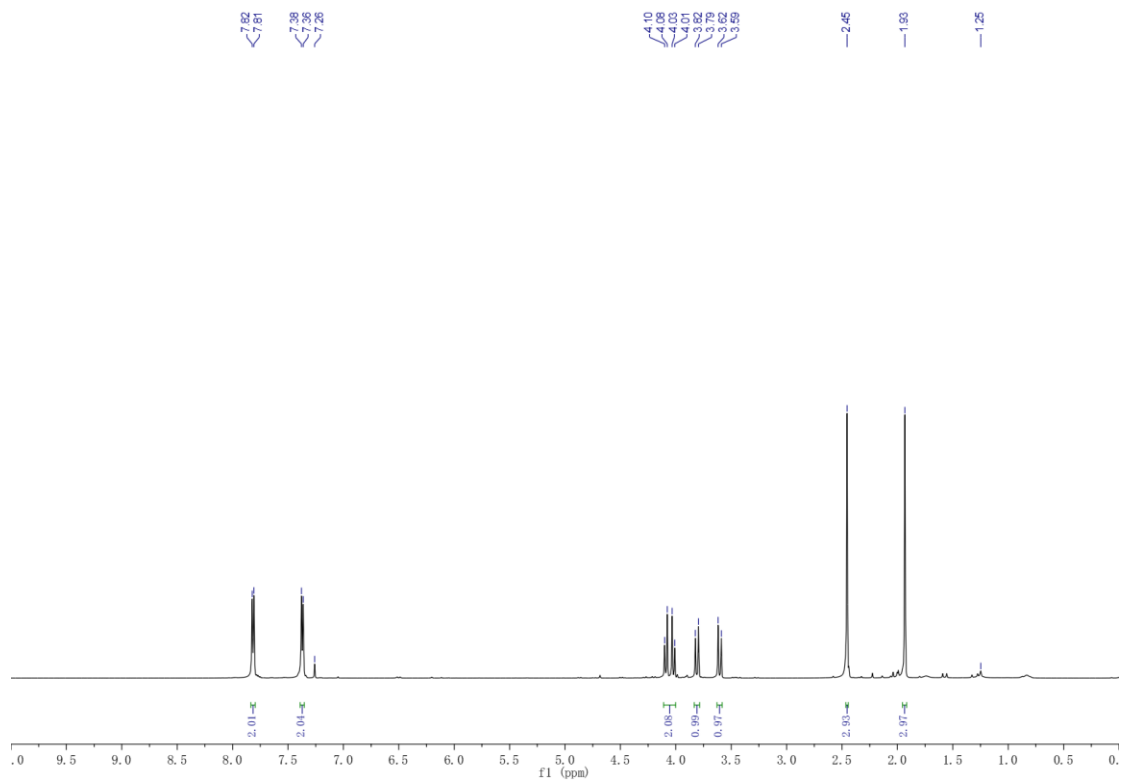

<sup>1</sup>H NMR of compound **33** (500 MHz, CDCl<sub>3</sub>)

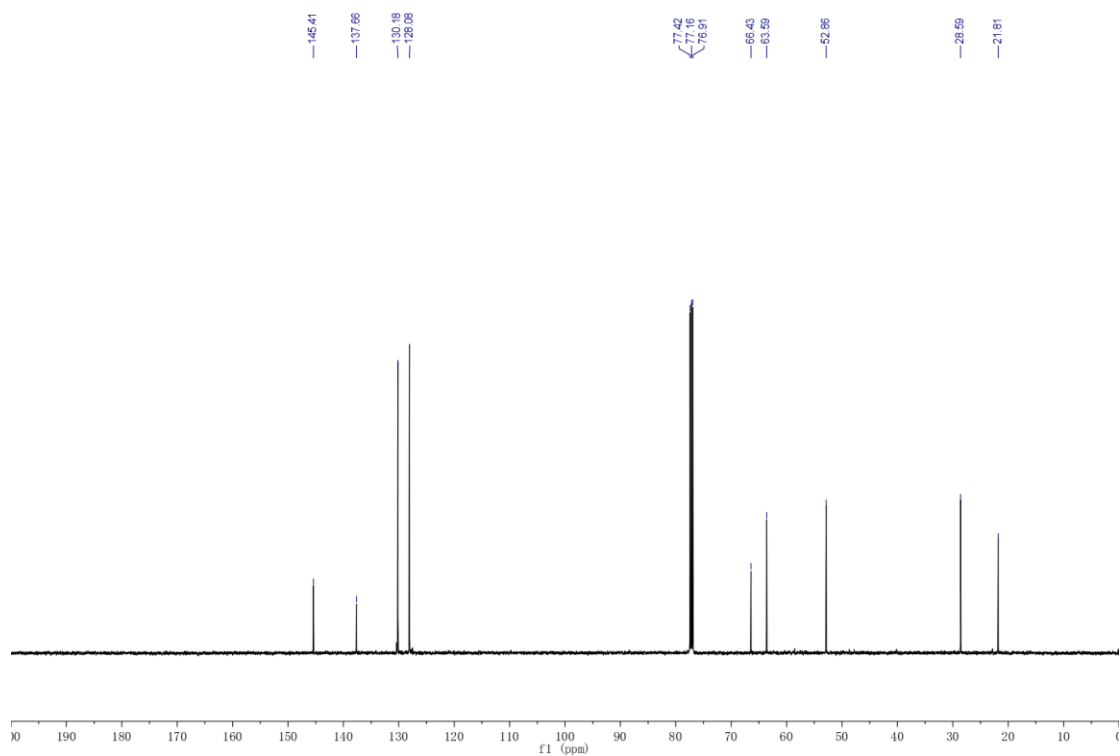

<sup>13</sup>C NMR of compound **33** (126 MHz, CDCl<sub>3</sub>)

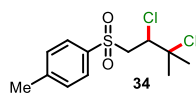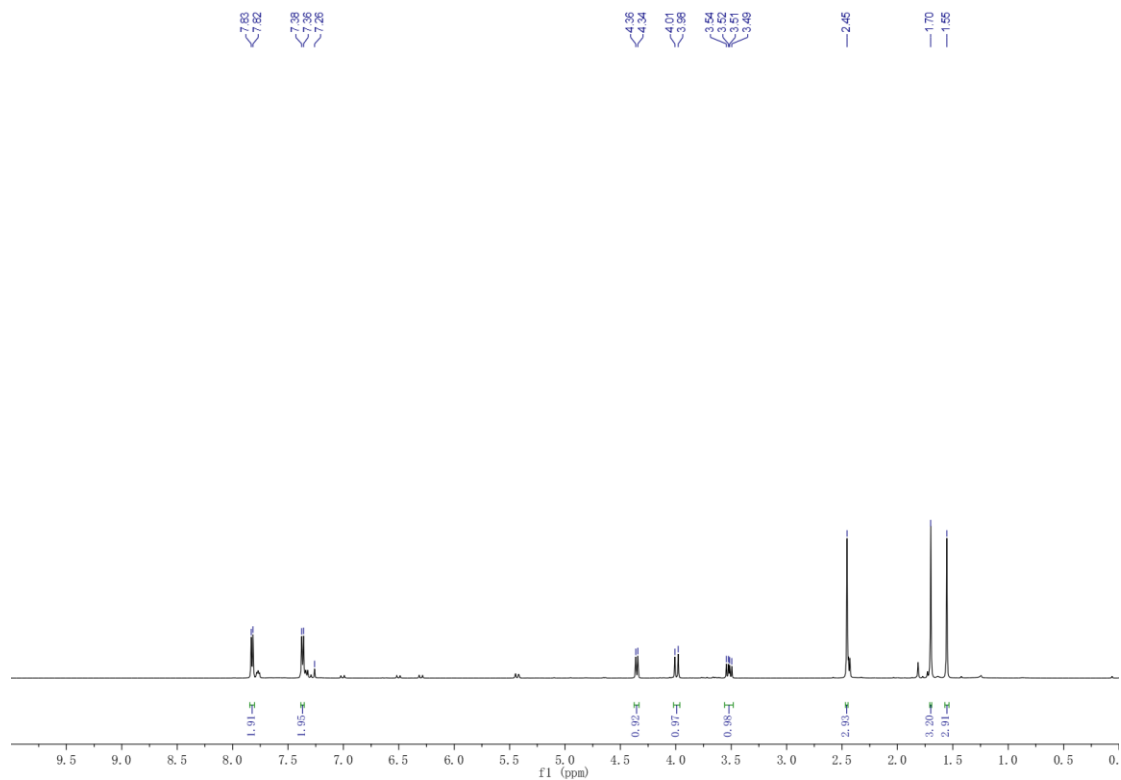

$^1\text{H}$  NMR of compound **34** (500 MHz,  $\text{CDCl}_3$ )

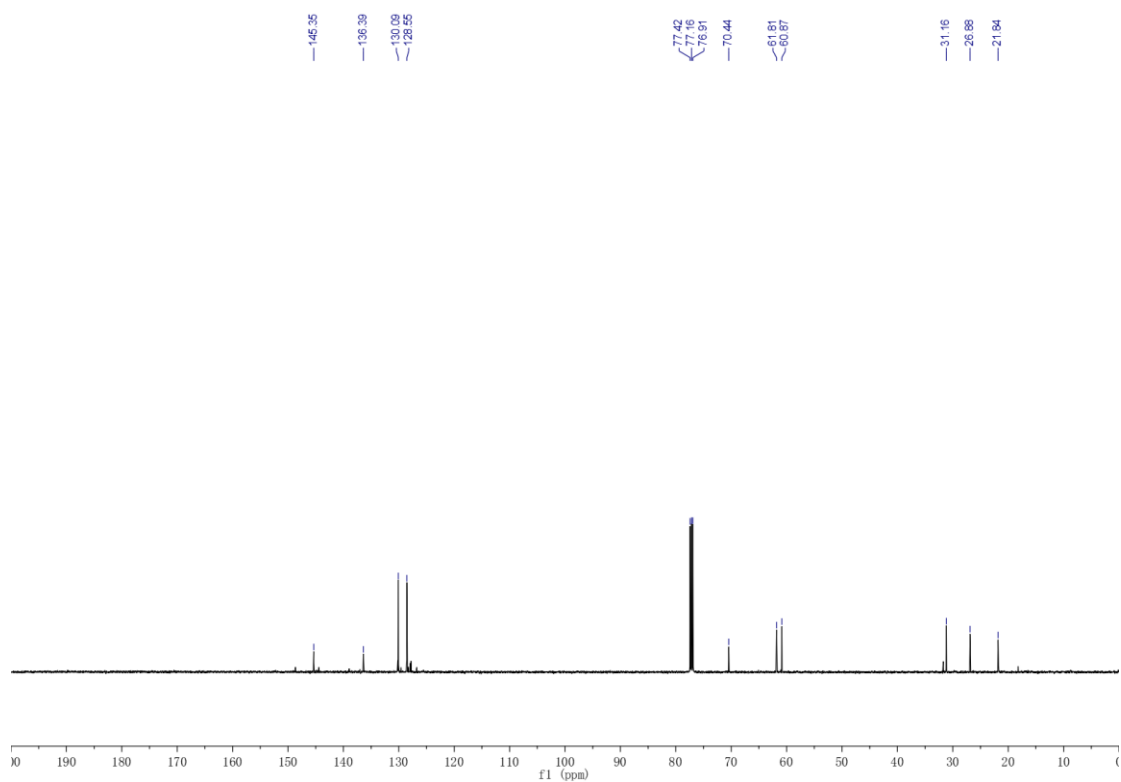

$^{13}\text{C}$  NMR of compound **34** (126 MHz,  $\text{CDCl}_3$ )



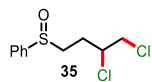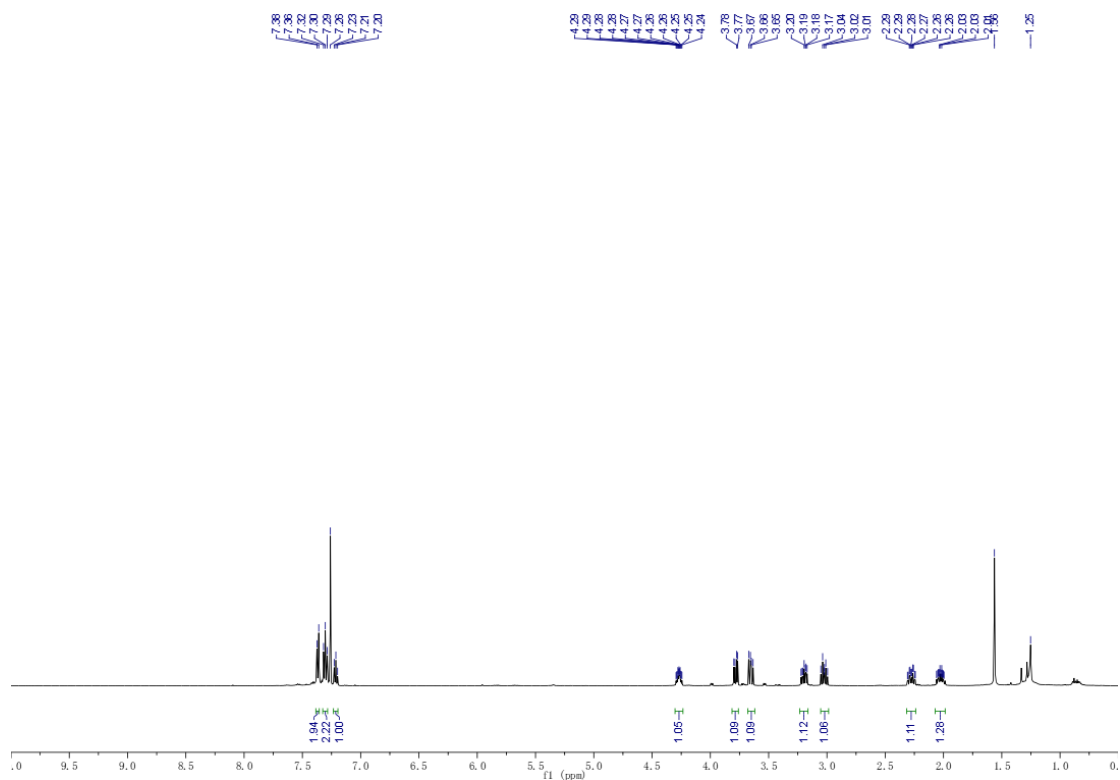

<sup>1</sup>H NMR of compound **35** (500 MHz, CDCl<sub>3</sub>)

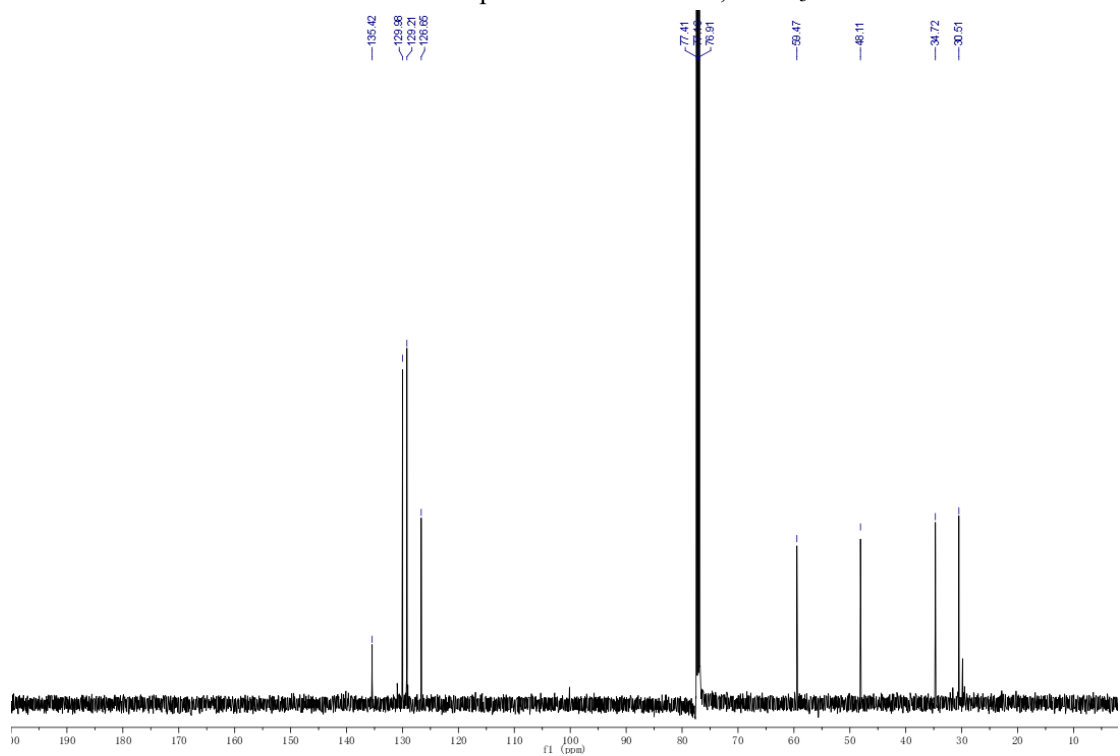

<sup>13</sup>C NMR of compound **35** (126 MHz, CDCl<sub>3</sub>)

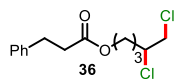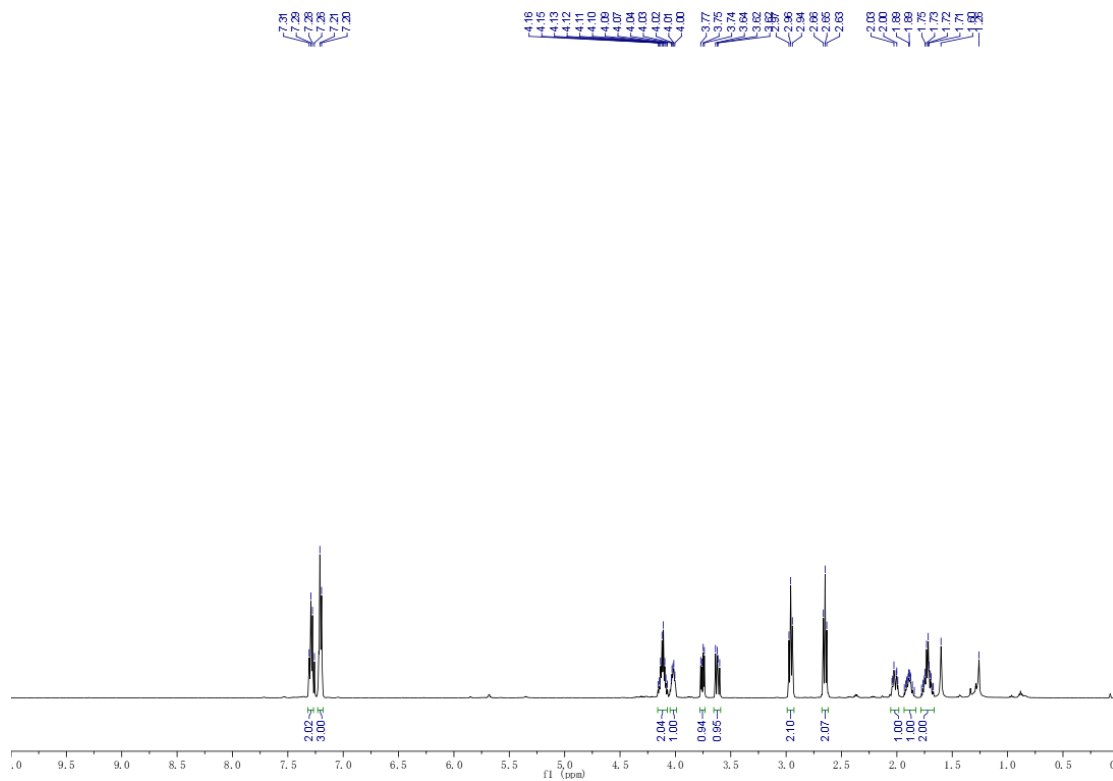

<sup>1</sup>H NMR of compound **36** (500 MHz, CDCl<sub>3</sub>)

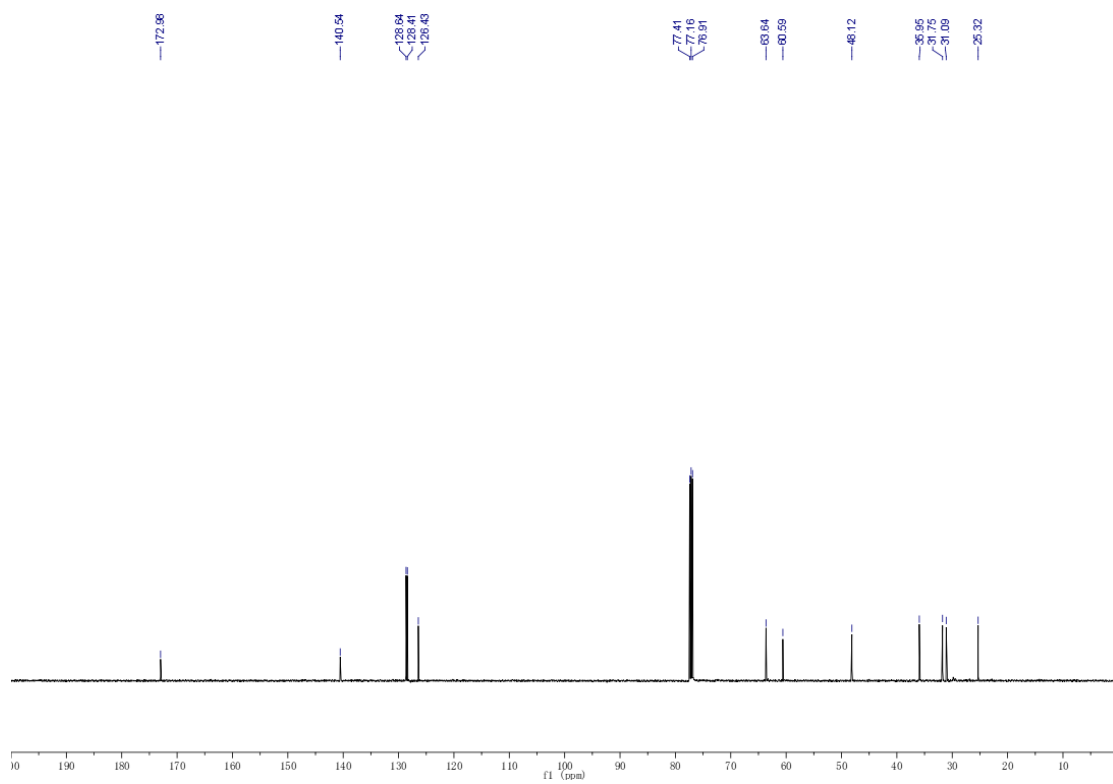

<sup>13</sup>C NMR of compound **36** (126 MHz, CDCl<sub>3</sub>)

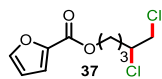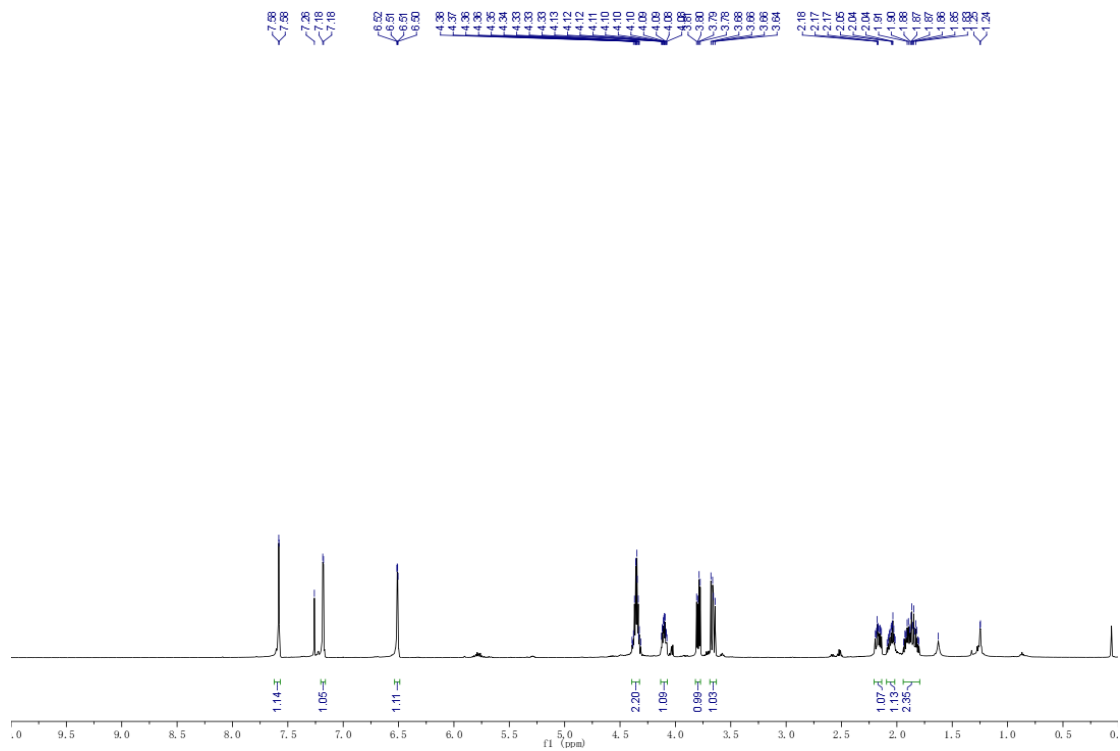

<sup>1</sup>H NMR of compound **37** (500 MHz, CDCl<sub>3</sub>)

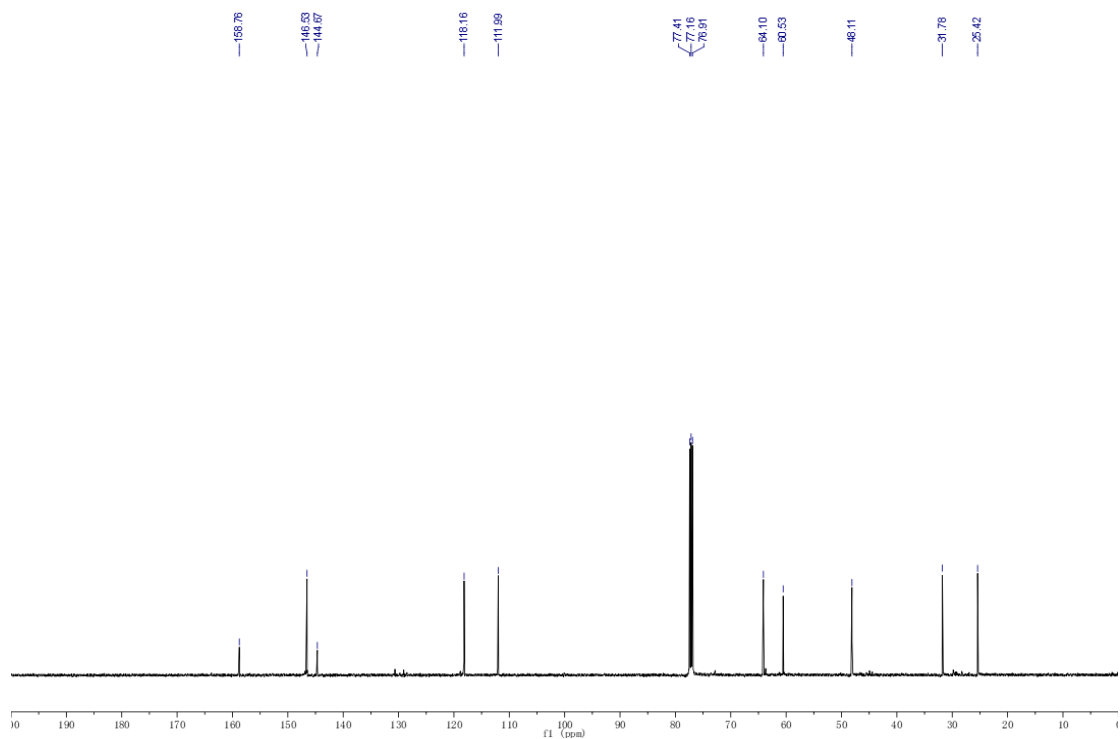

<sup>13</sup>C NMR of compound **37** (126 MHz, CDCl<sub>3</sub>)

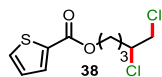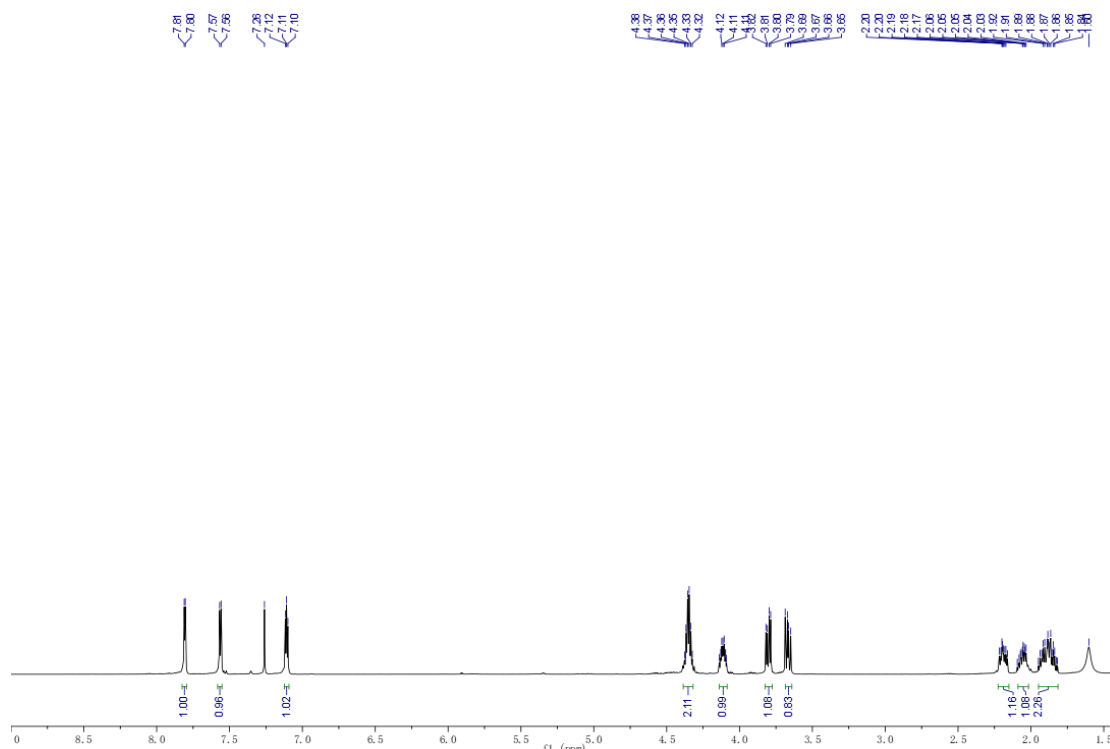

$^1\text{H}$  NMR of compound **38** (500 MHz,  $\text{CDCl}_3$ )

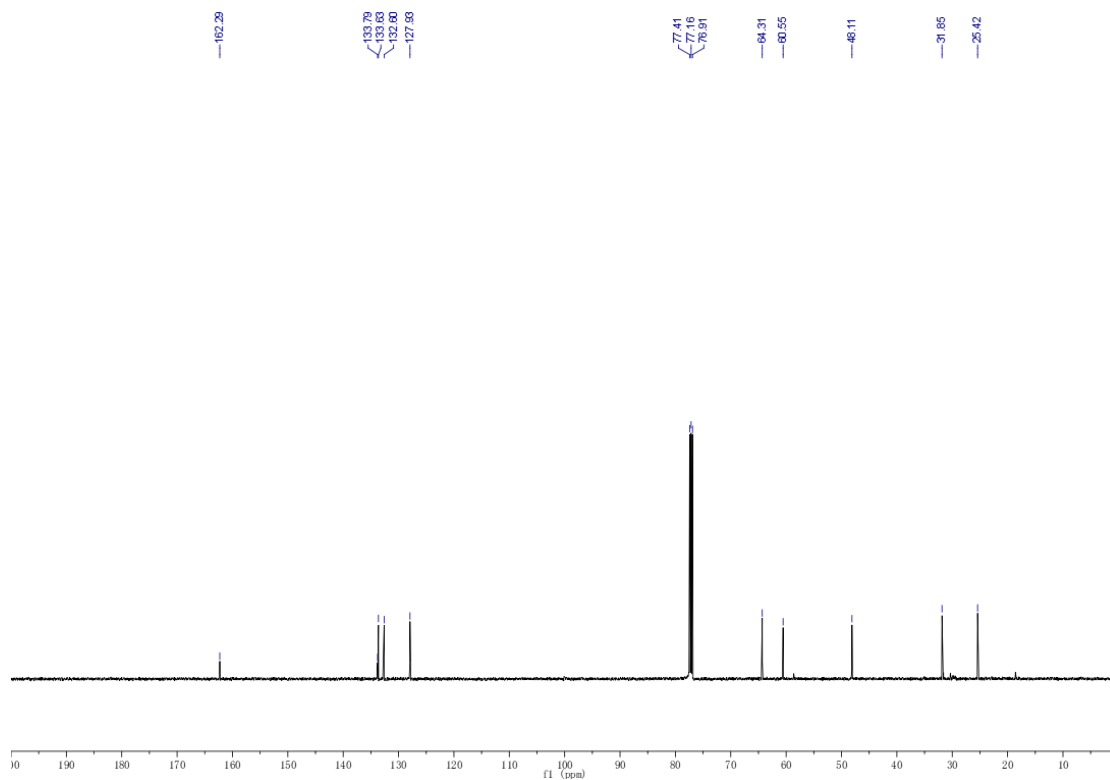

$^{13}\text{C}$  NMR of compound **38** (126 MHz,  $\text{CDCl}_3$ )

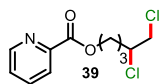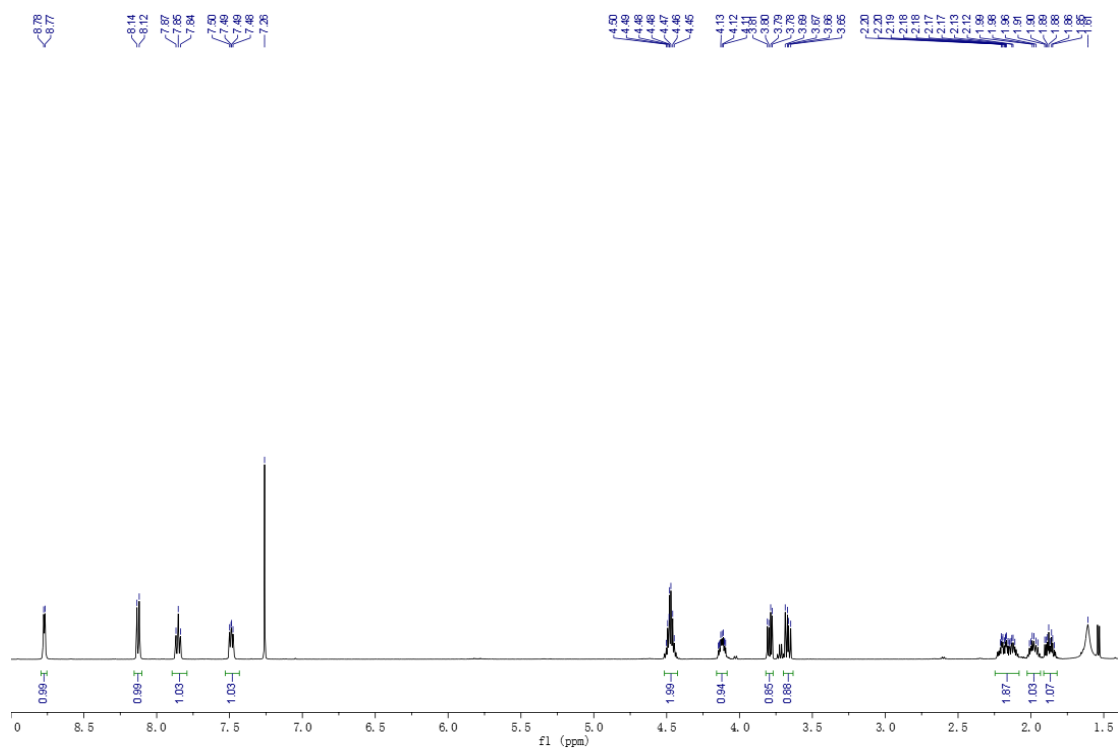

<sup>1</sup>H NMR of compound **39** (500 MHz, CDCl<sub>3</sub>)

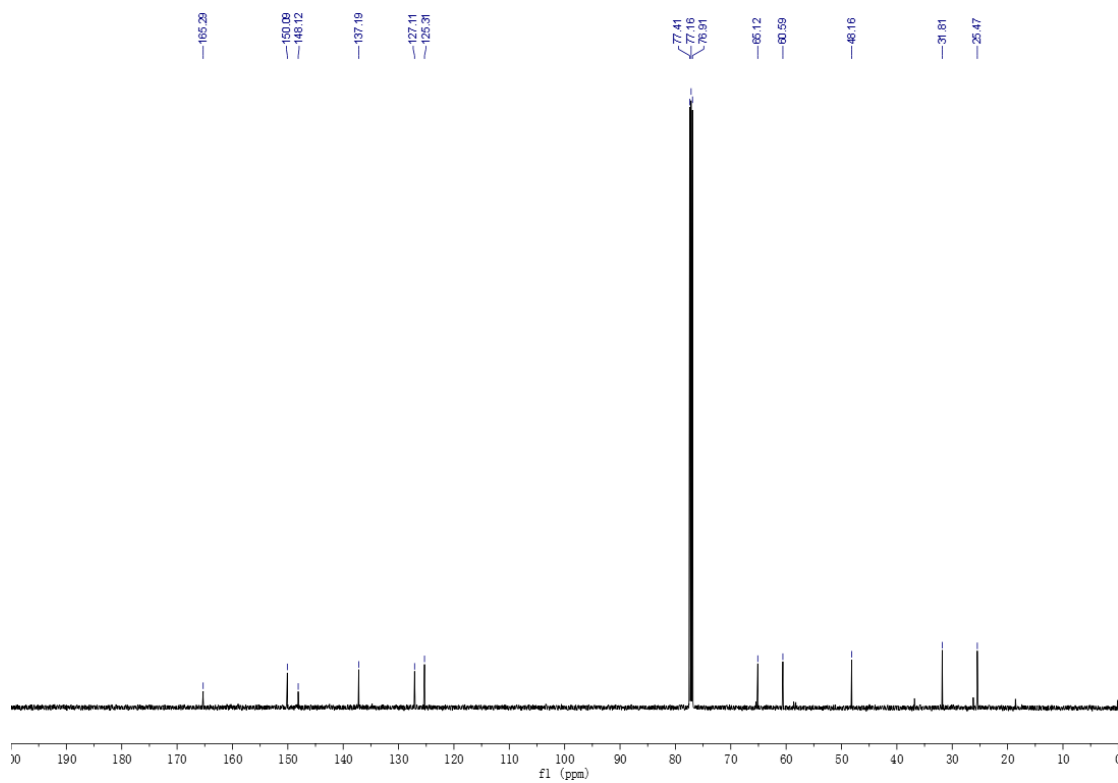

<sup>13</sup>C NMR of compound **39** (126 MHz, CDCl<sub>3</sub>)

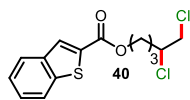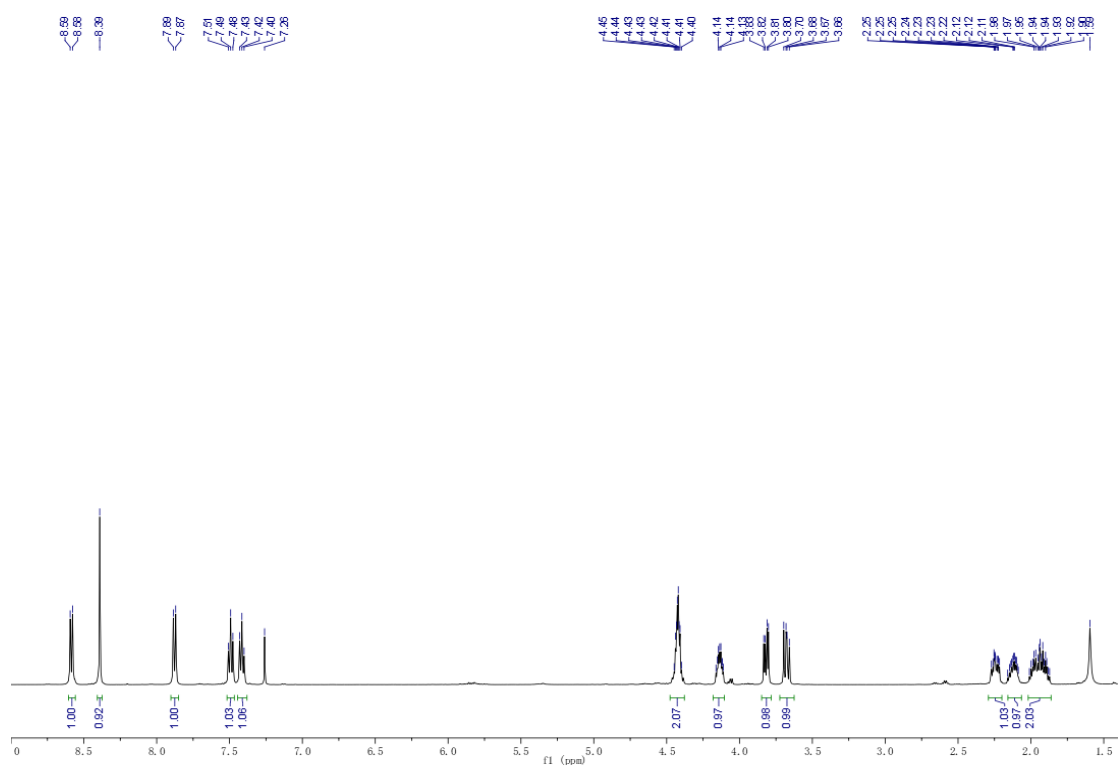

$^1\text{H}$  NMR of compound **40** (500 MHz,  $\text{CDCl}_3$ )

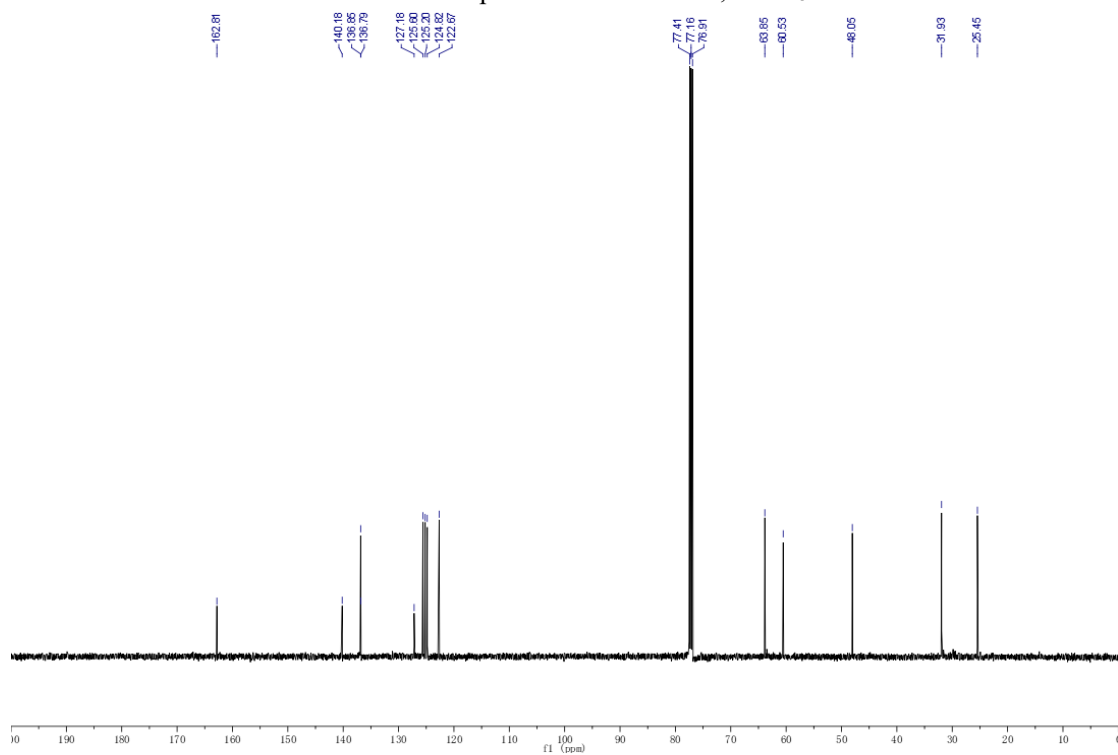

$^{13}\text{C}$  NMR of compound **40** (126 MHz,  $\text{CDCl}_3$ )

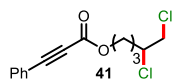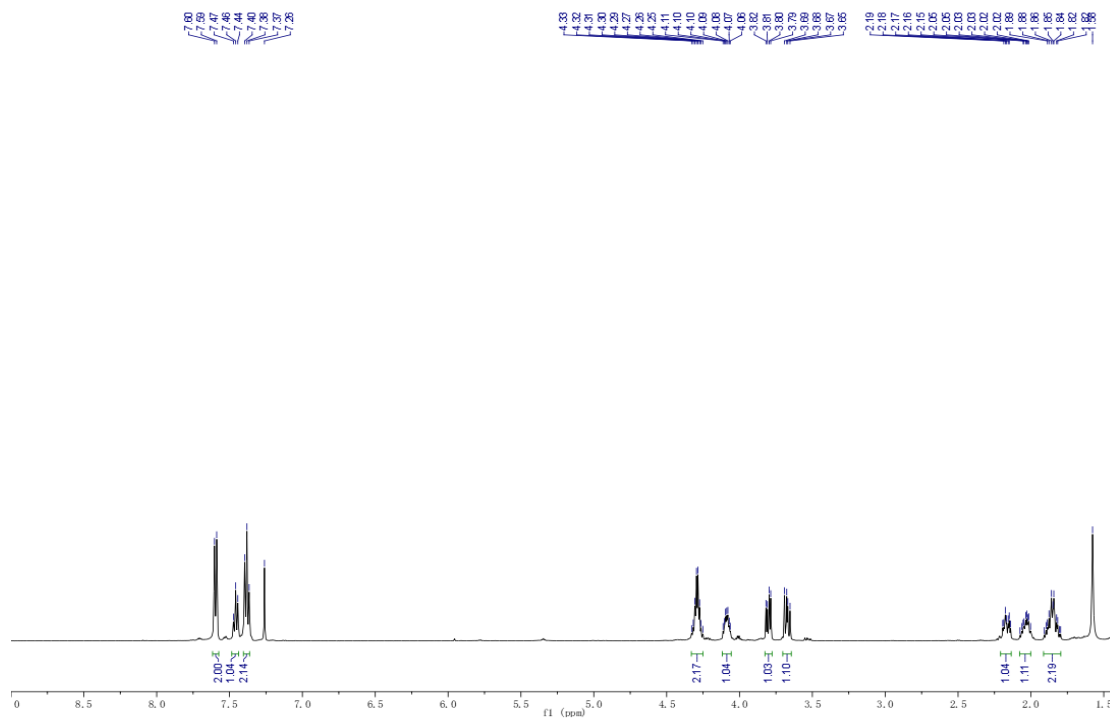

$^1\text{H}$  NMR of compound **41** (500 MHz,  $\text{CDCl}_3$ )

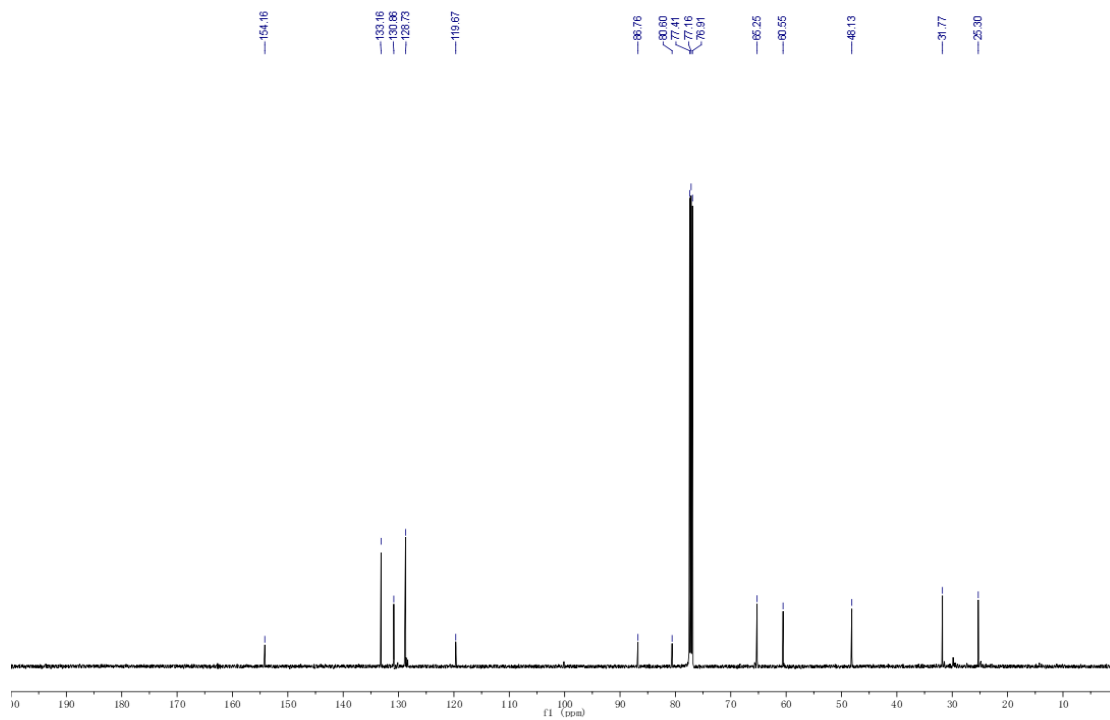

$^{13}\text{C}$  NMR of compound **41** (126 MHz,  $\text{CDCl}_3$ )

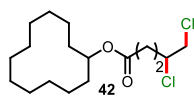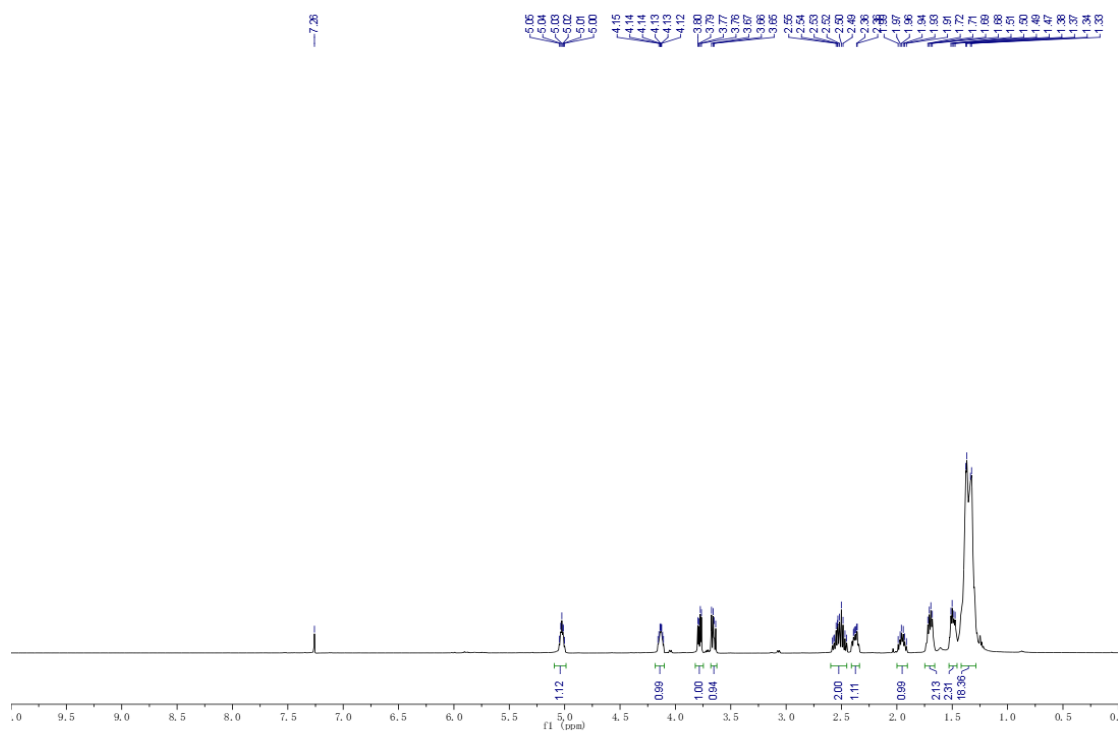

$^1\text{H}$  NMR of compound **42** (500 MHz,  $\text{CDCl}_3$ )

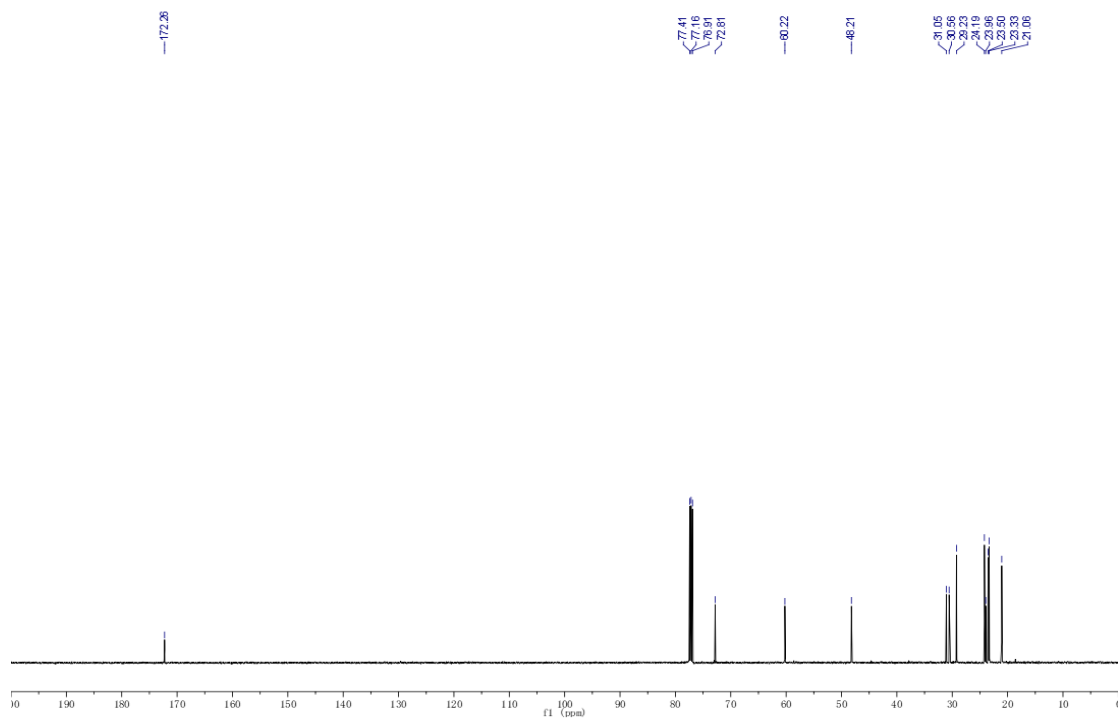

$^{13}\text{C}$  NMR of compound **42** (126 MHz,  $\text{CDCl}_3$ )

S140



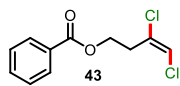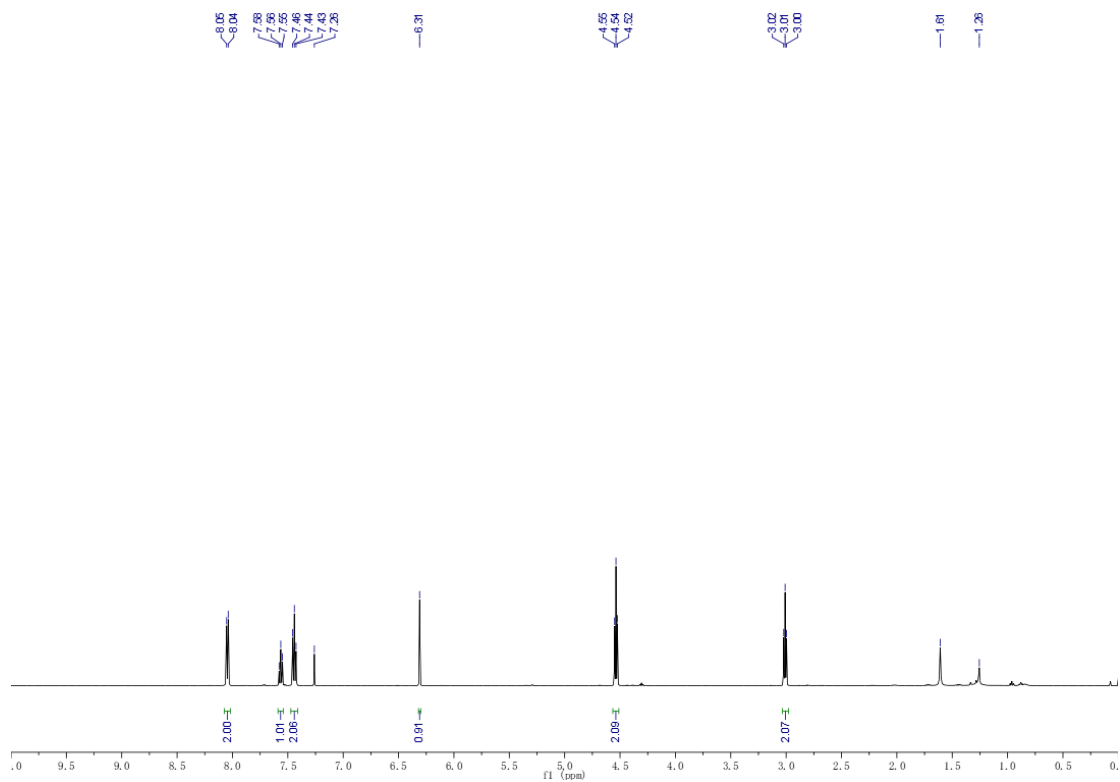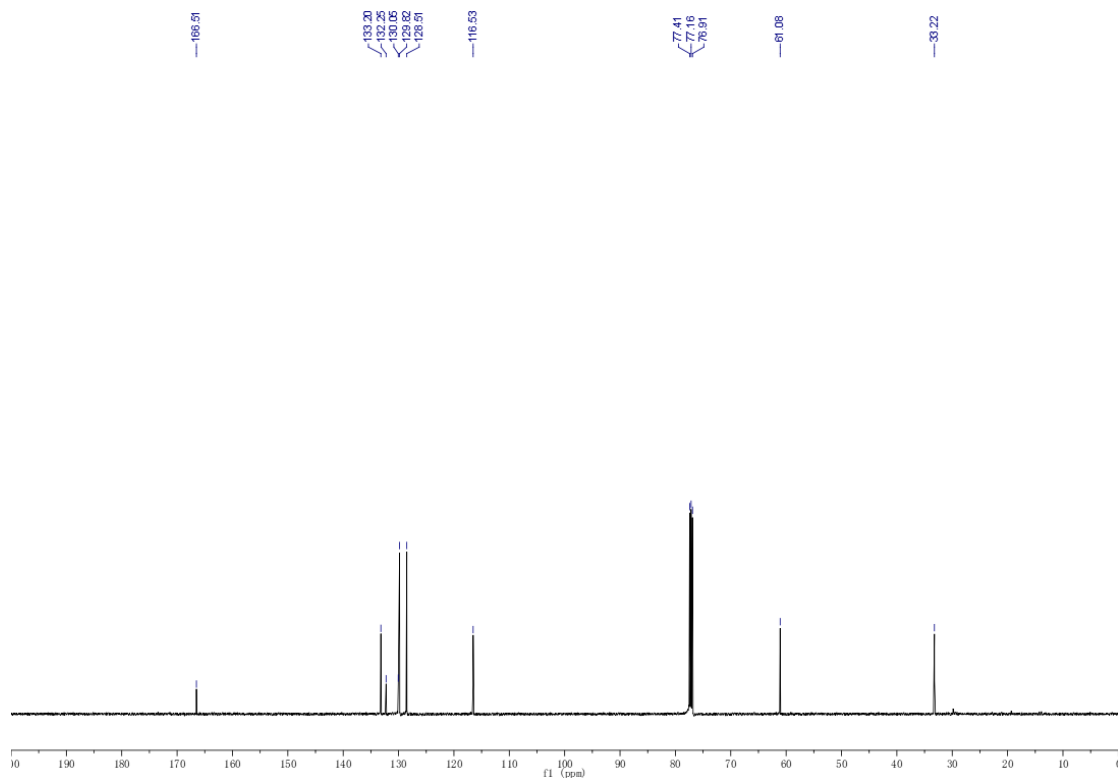

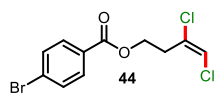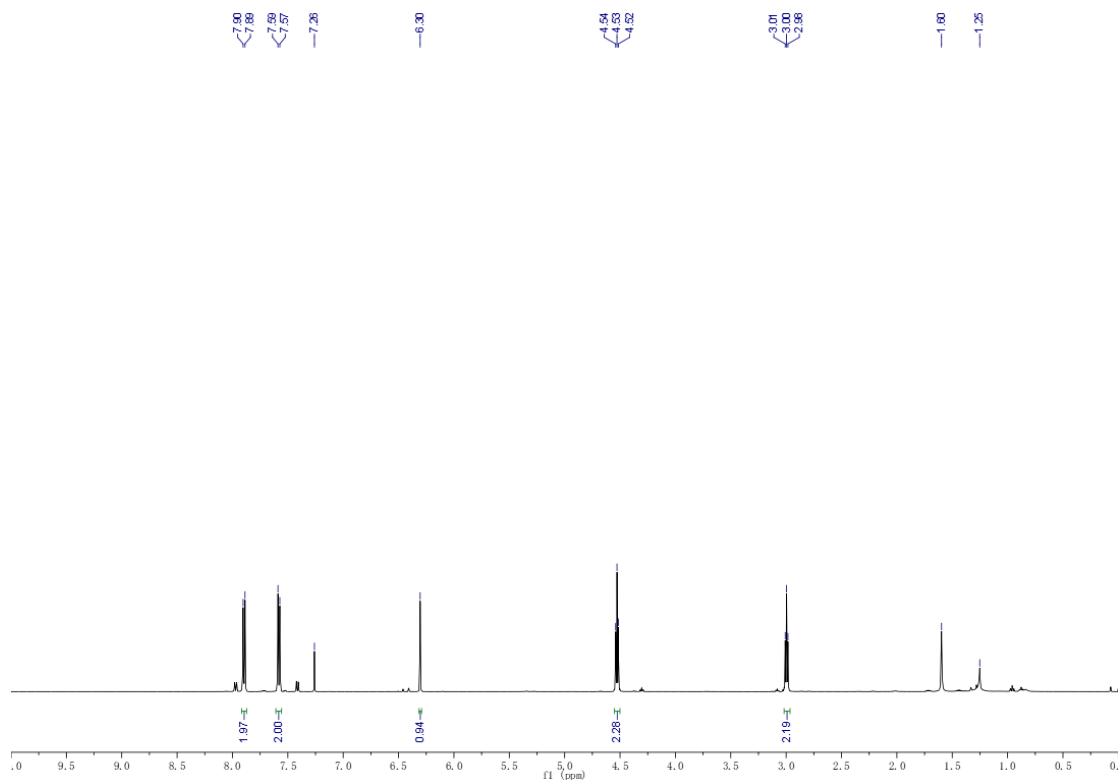

$^1\text{H}$  NMR of compound **44** (500 MHz,  $\text{CDCl}_3$ )

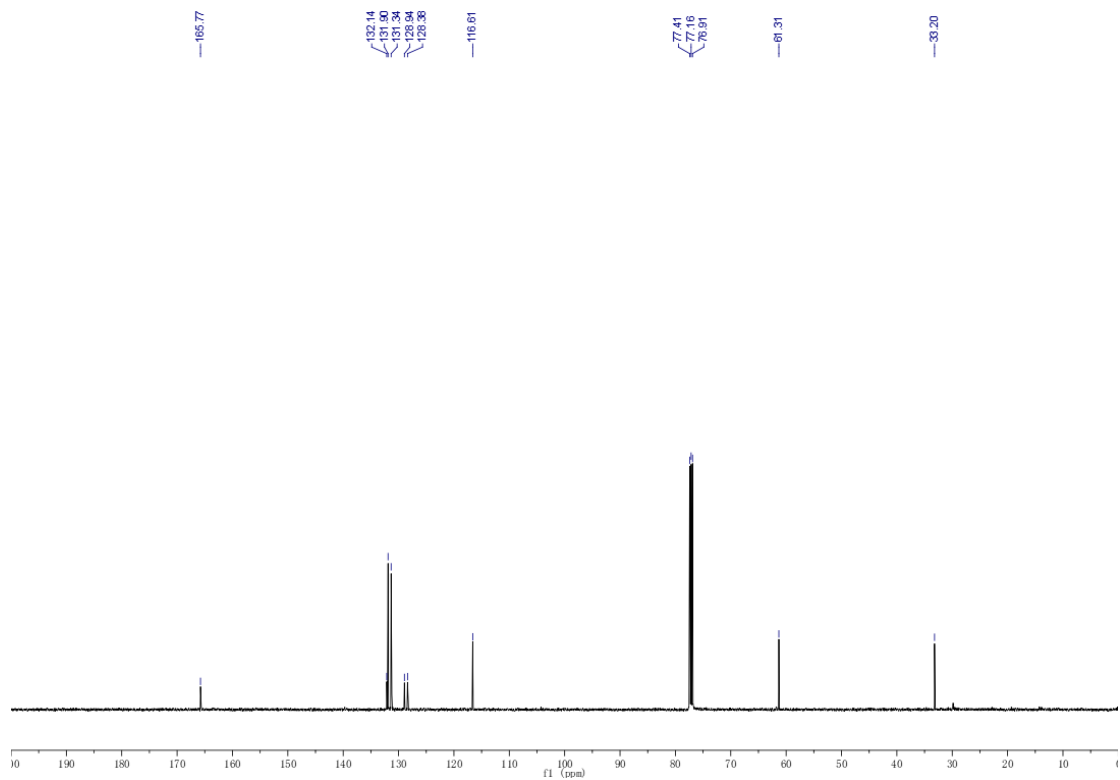

$^{13}\text{C}$  NMR of compound **44** (126 MHz,  $\text{CDCl}_3$ )

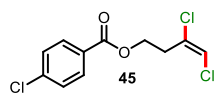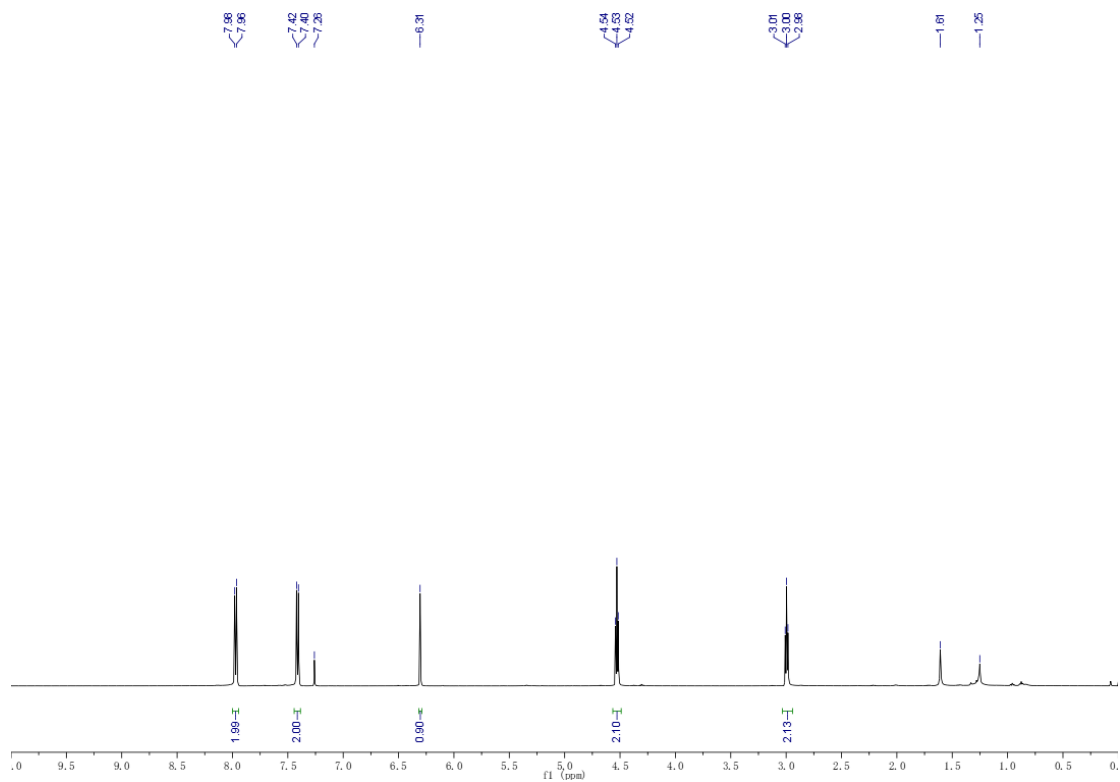

$^1\text{H}$  NMR of compound **45** (500 MHz,  $\text{CDCl}_3$ )

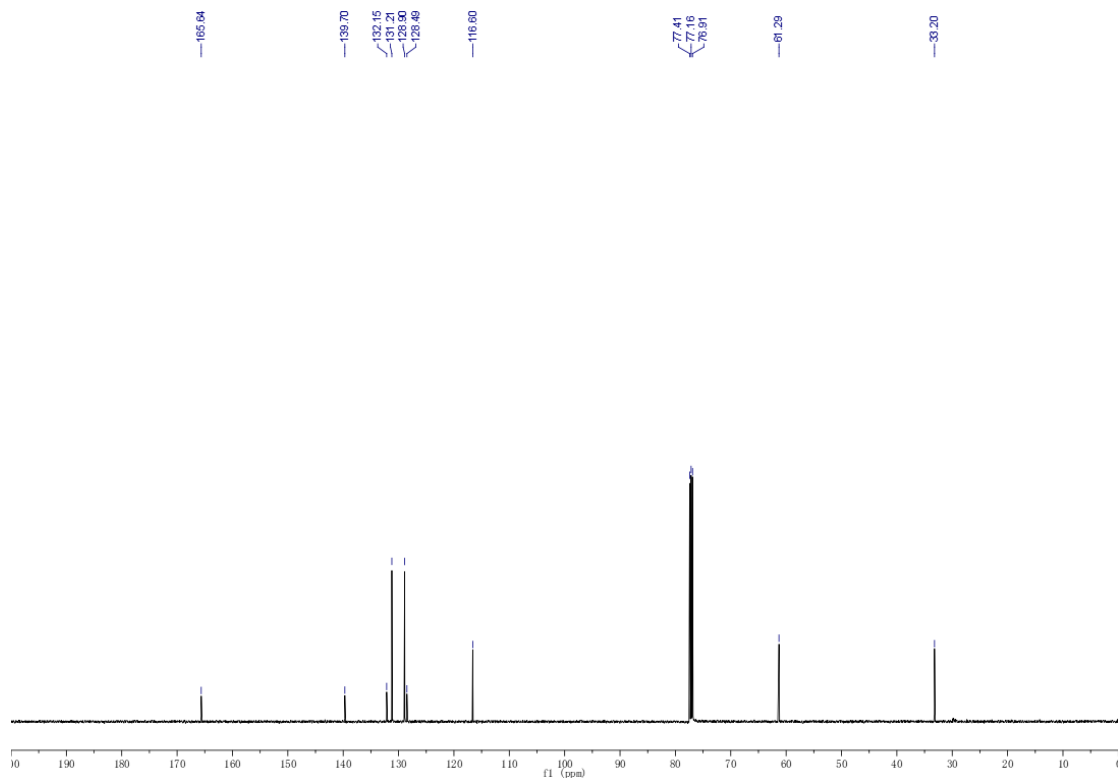

$^{13}\text{C}$  NMR of compound **45** (126 MHz,  $\text{CDCl}_3$ )

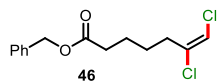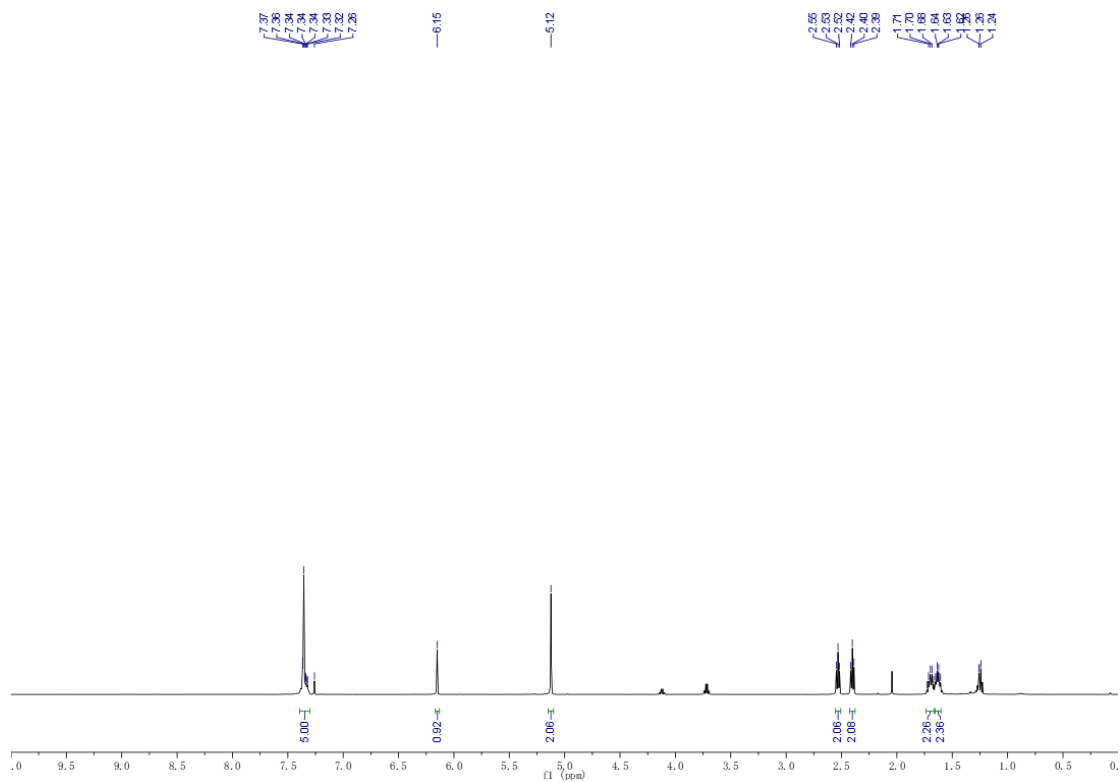

$^1\text{H}$  NMR of compound **46** (500 MHz,  $\text{CDCl}_3$ )

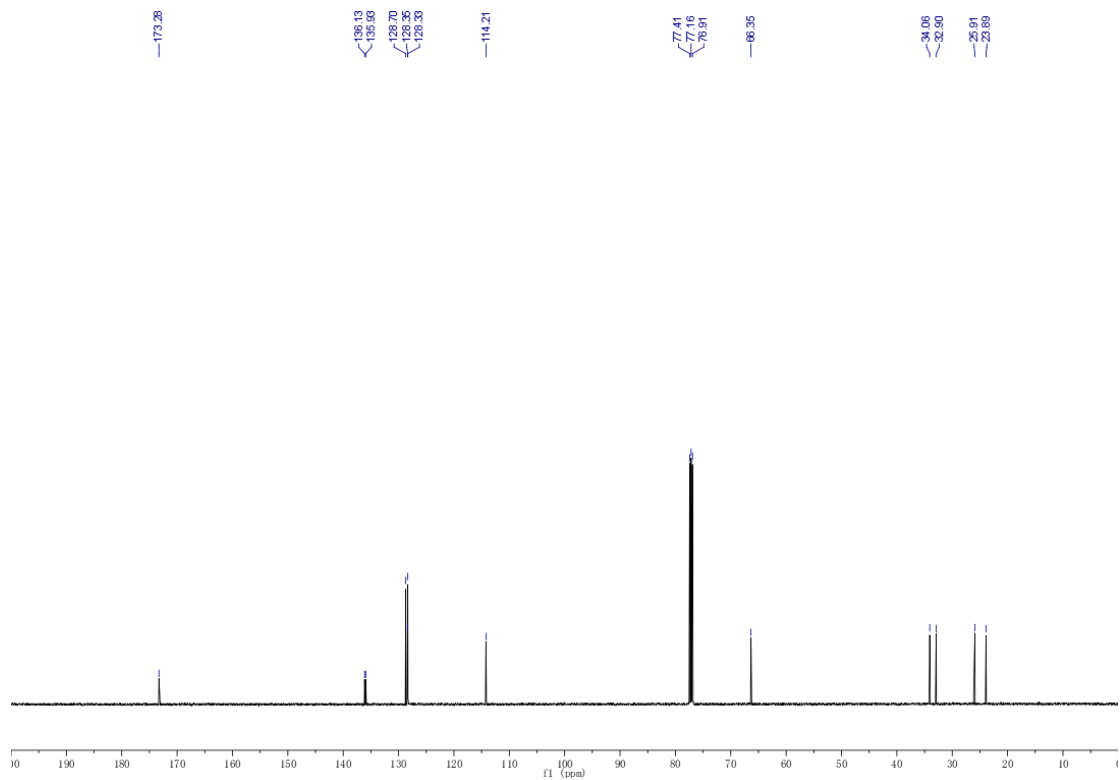

$^{13}\text{C}$  NMR of compound **46** (126 MHz,  $\text{CDCl}_3$ )

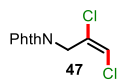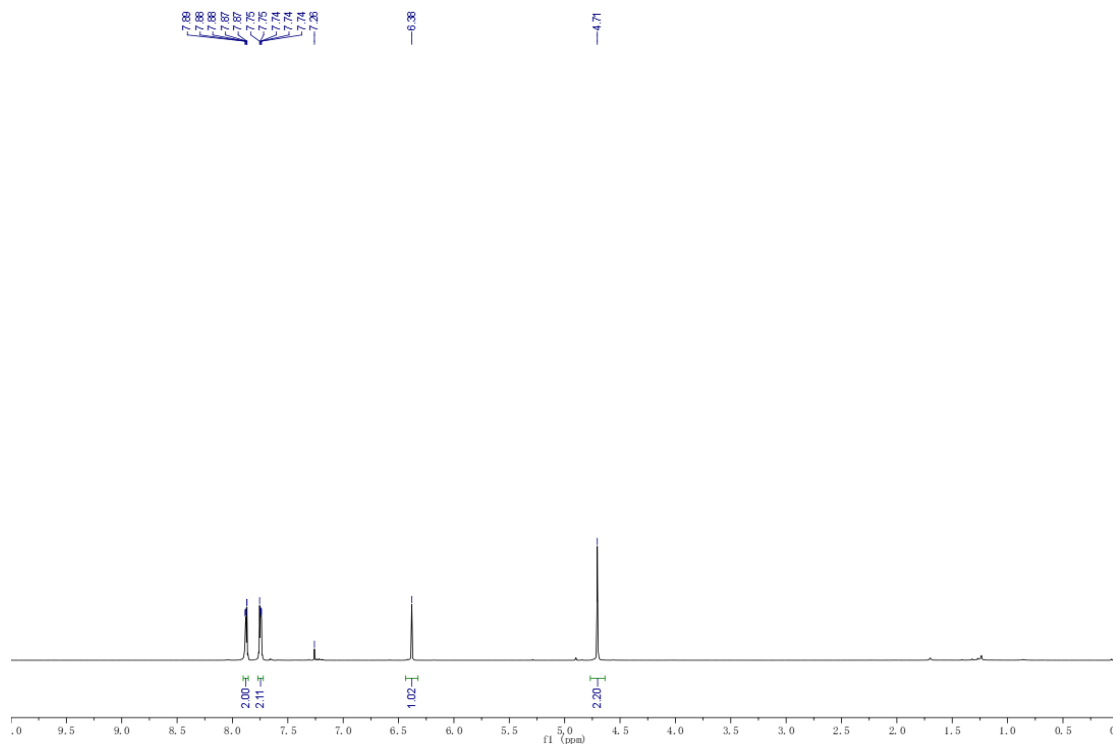

<sup>1</sup>H NMR of compound **47** (500 MHz, CDCl<sub>3</sub>)

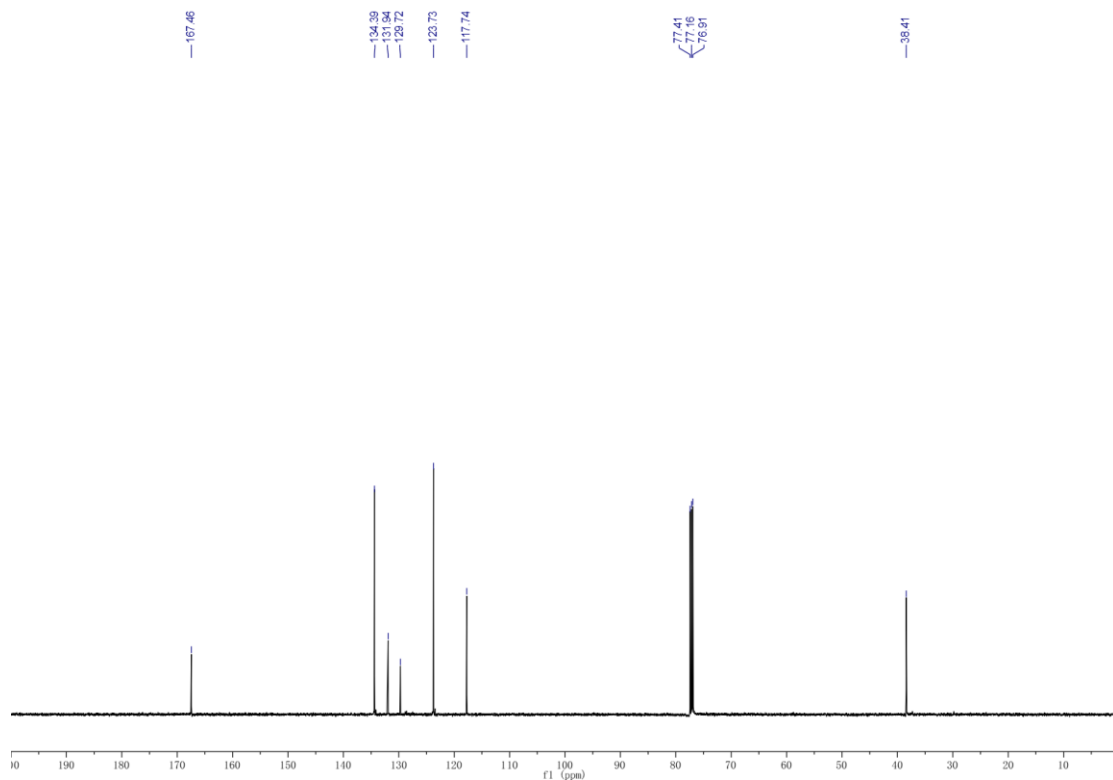

<sup>13</sup>C NMR of compound **47** (126 MHz, CDCl<sub>3</sub>)

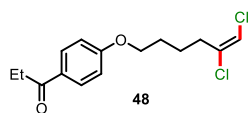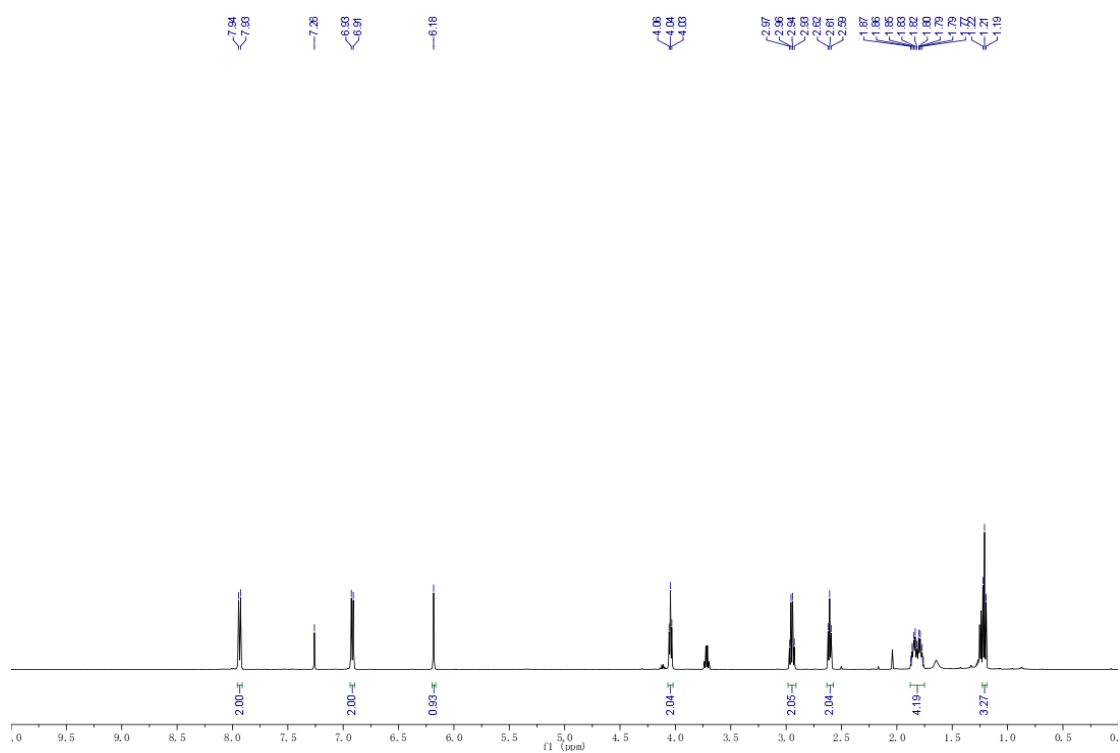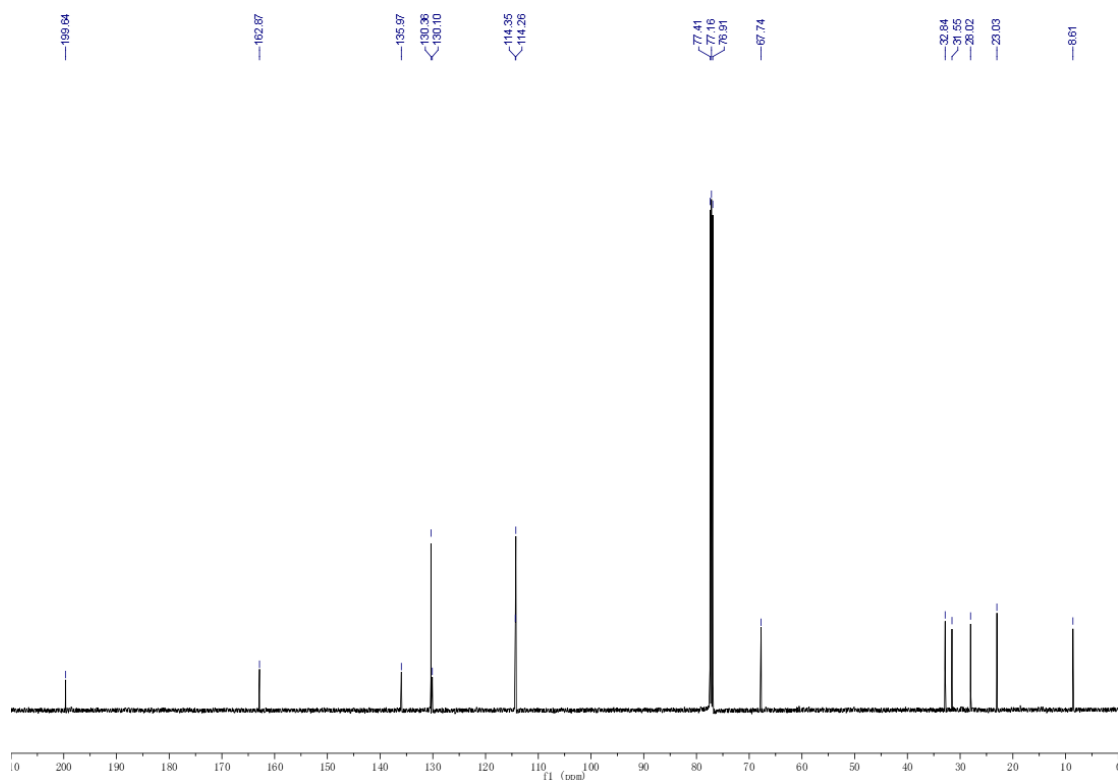

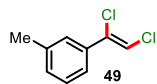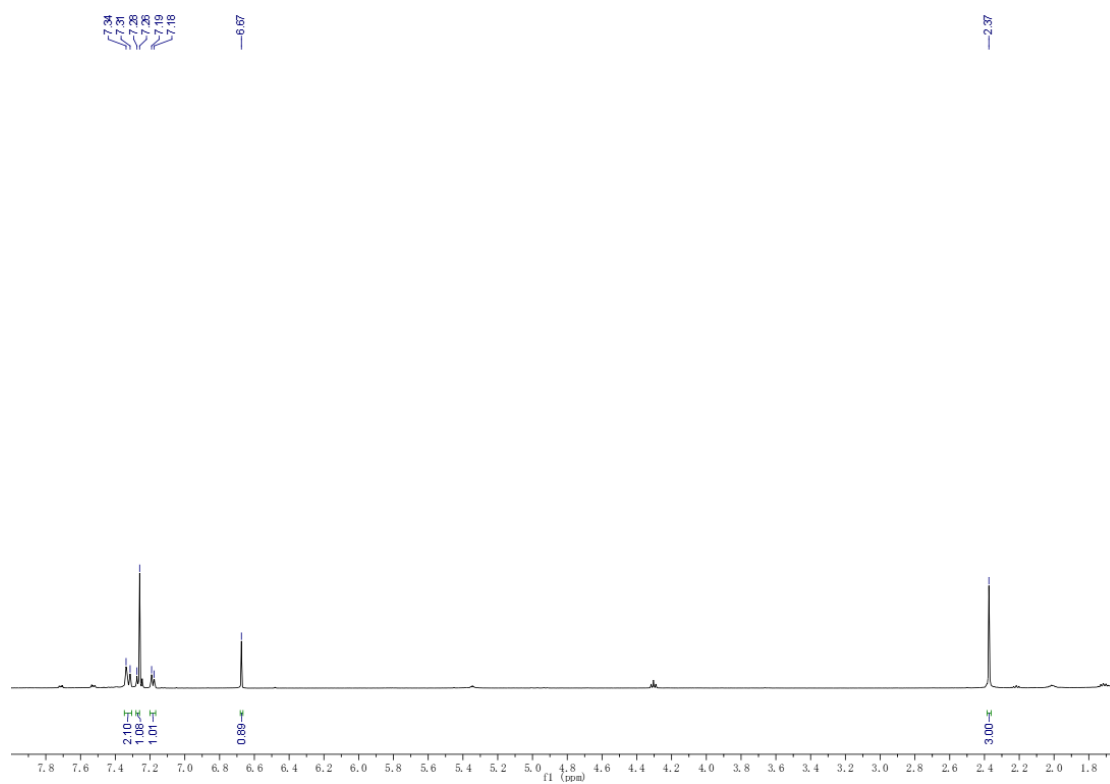

<sup>1</sup>H NMR of compound **49** (500 MHz, CDCl<sub>3</sub>)

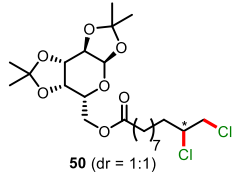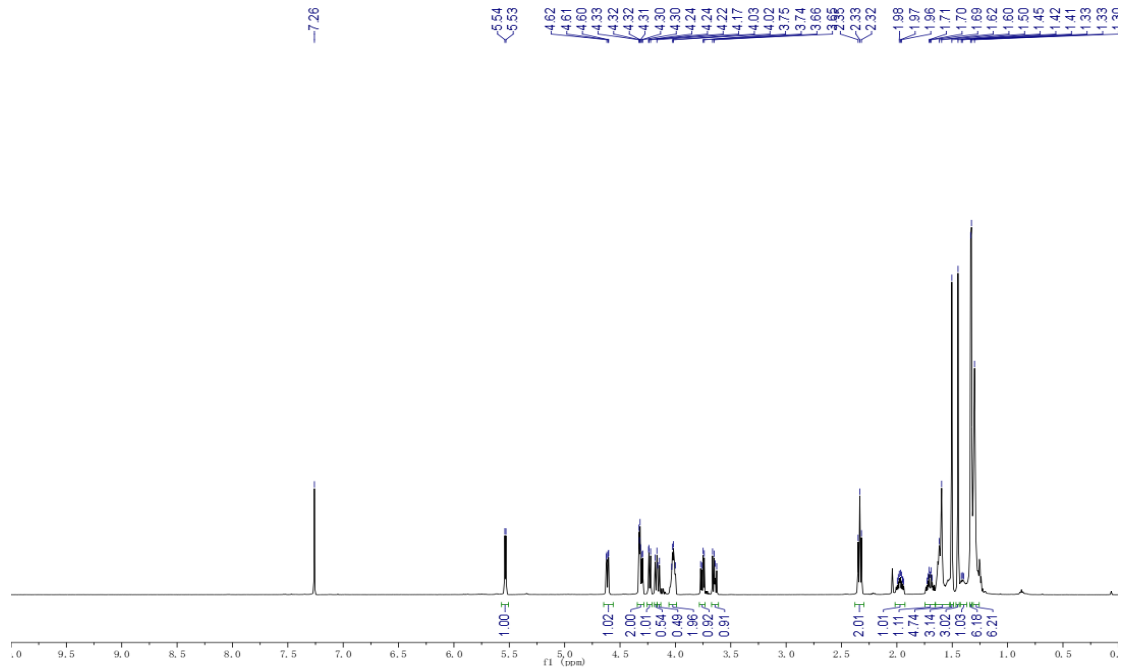

$^1\text{H}$  NMR of compound **50** (500 MHz,  $\text{CDCl}_3$ )

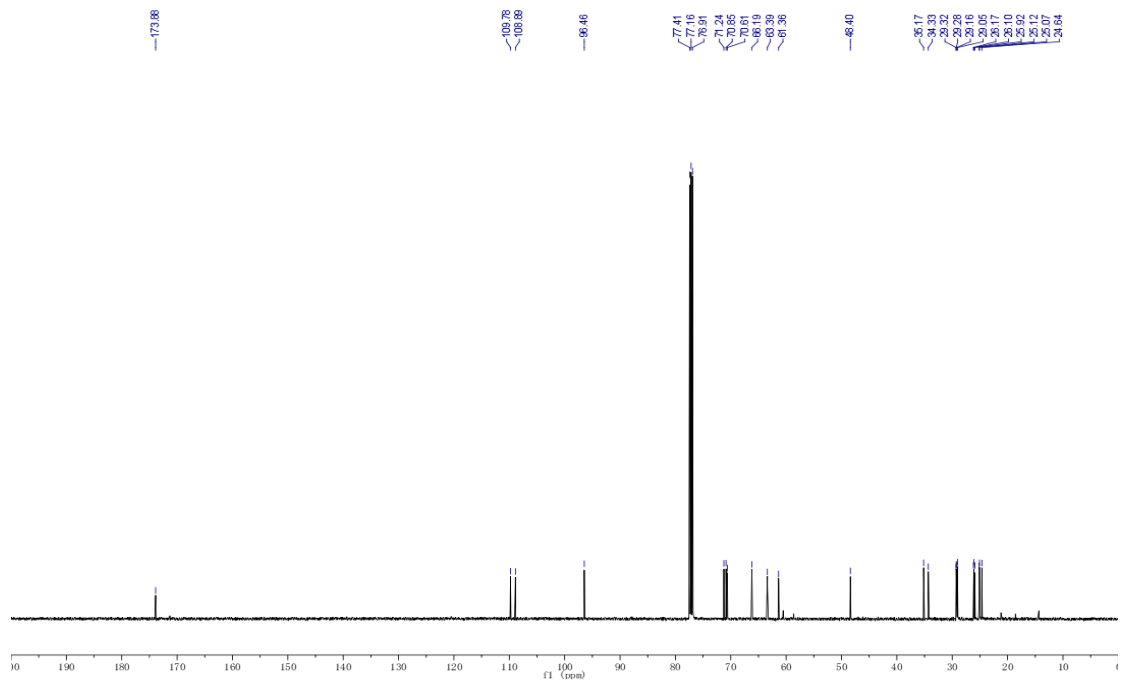

$^{13}\text{C}$  NMR of compound **50** (126 MHz,  $\text{CDCl}_3$ )



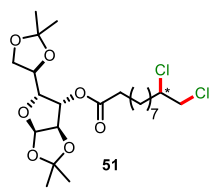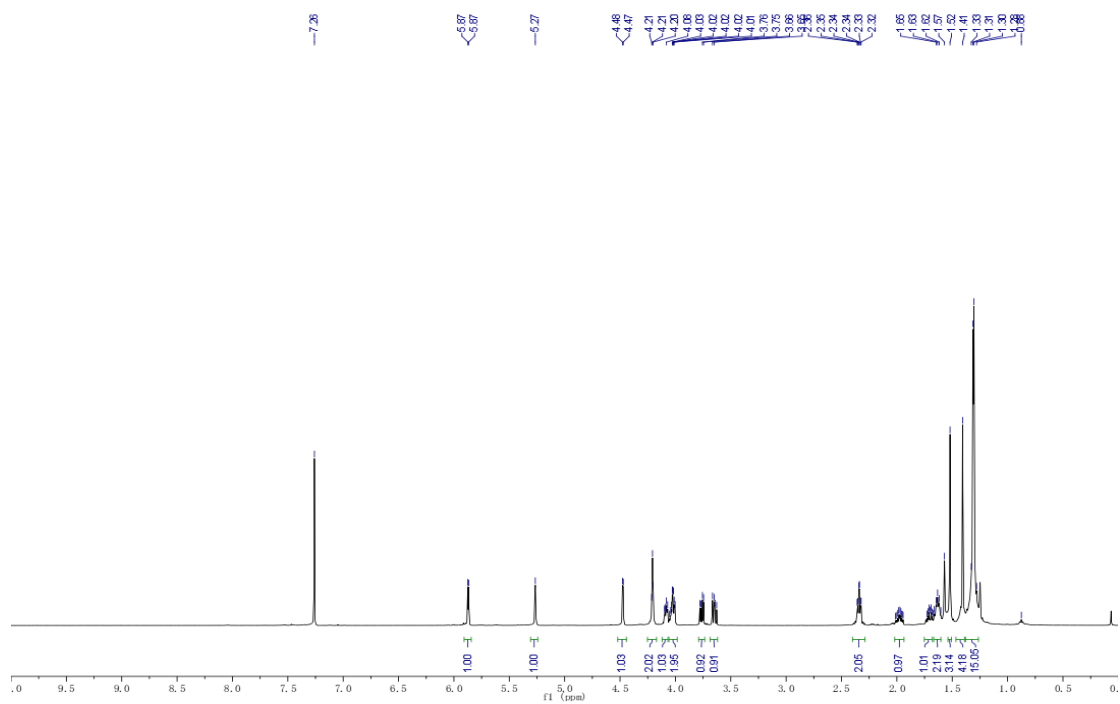

<sup>1</sup>H NMR of compound **51** (500 MHz, CDCl<sub>3</sub>)

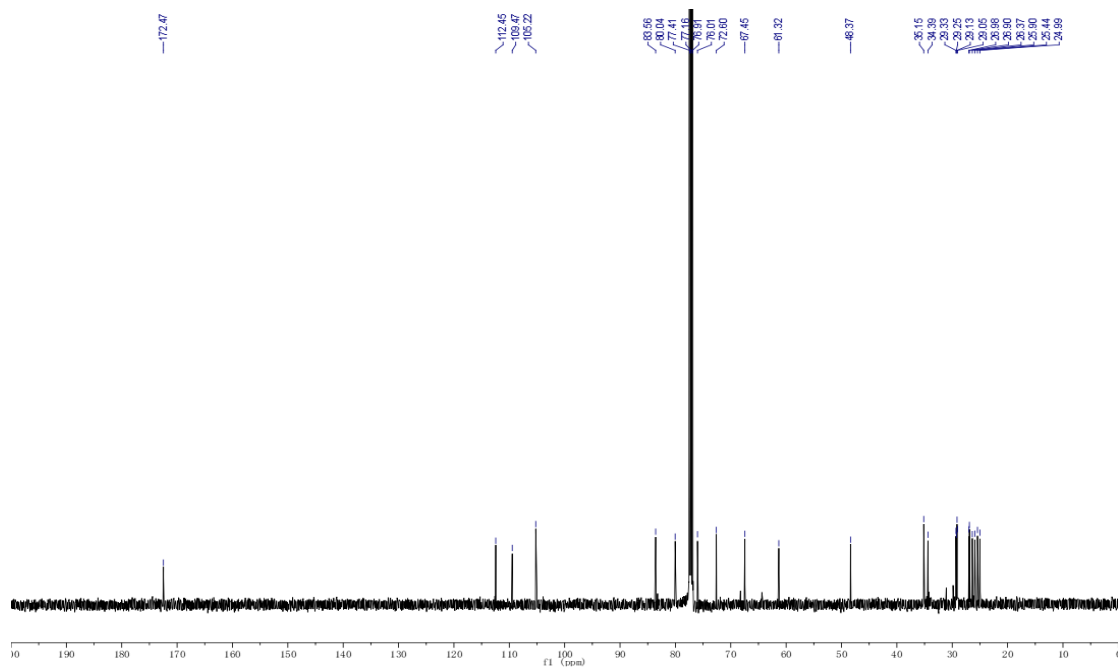

<sup>13</sup>C NMR of compound **51** (126 MHz, CDCl<sub>3</sub>)

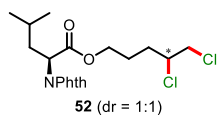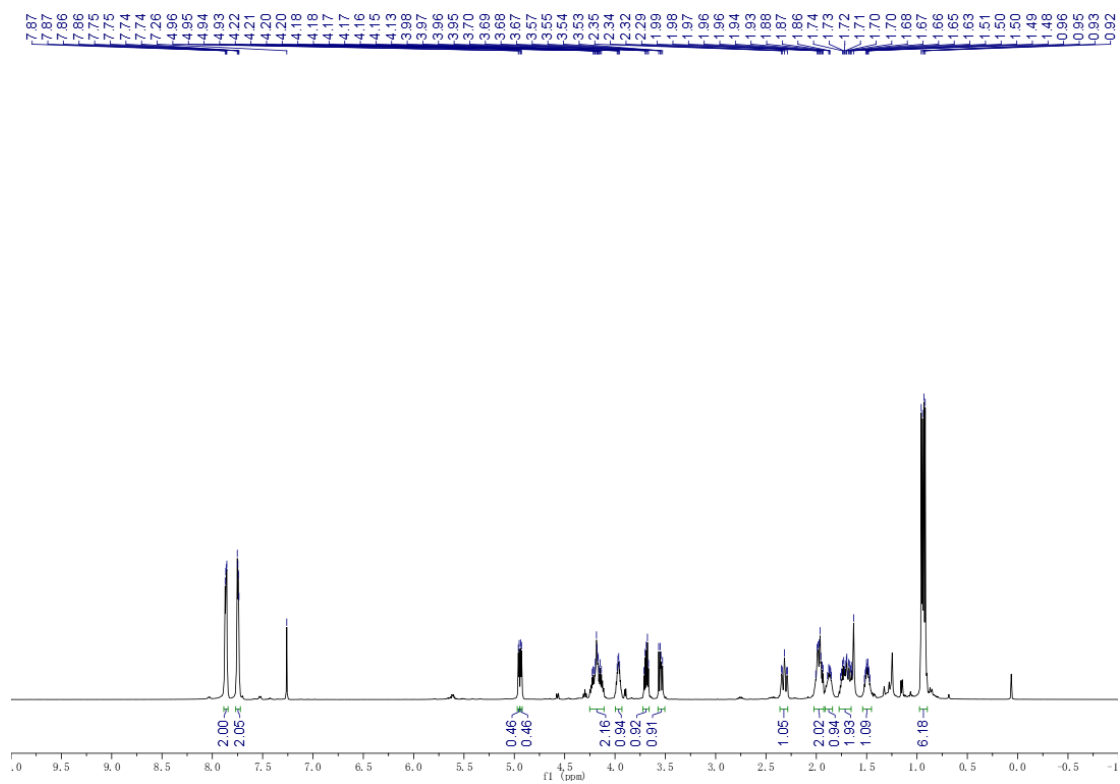

<sup>1</sup>H NMR of compound **52** (500 MHz, CDCl<sub>3</sub>)

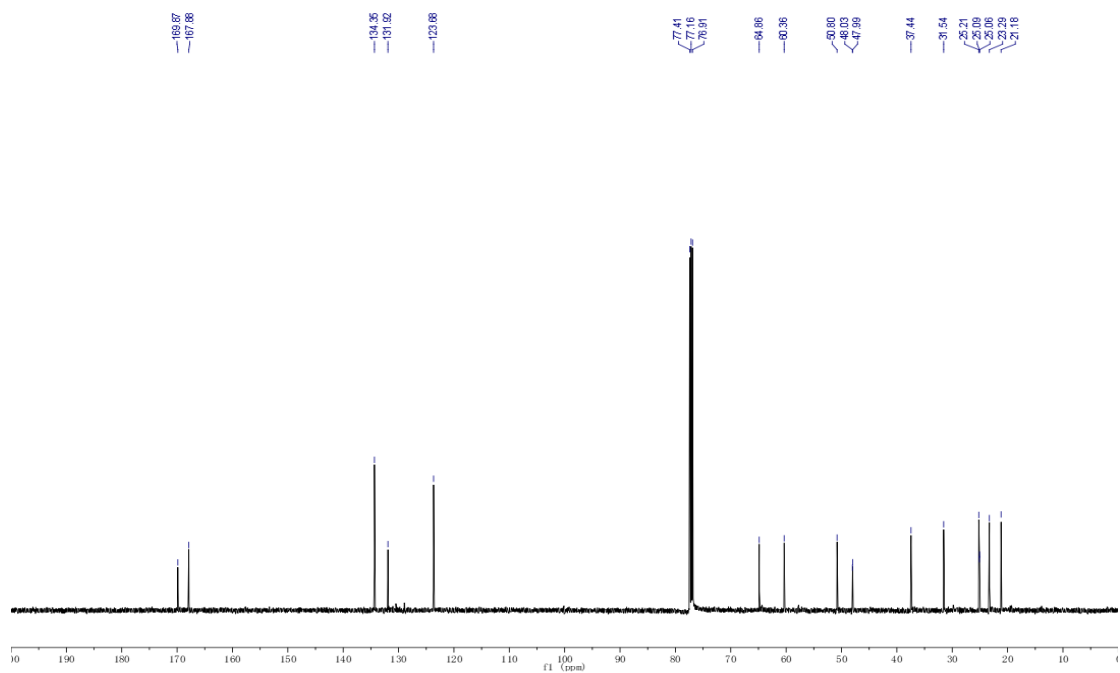

<sup>13</sup>C NMR of compound **52** (126 MHz, CDCl<sub>3</sub>)

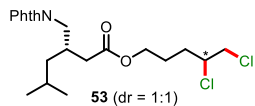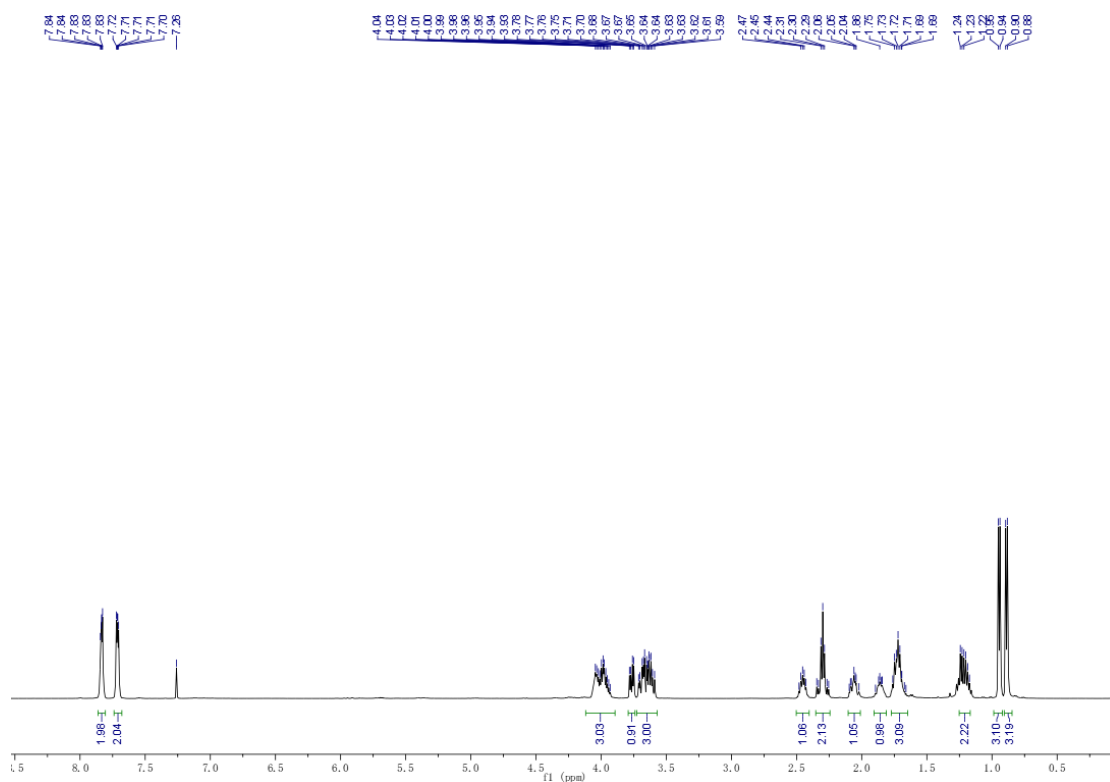

<sup>1</sup>H NMR of compound **53** (500 MHz, CDCl<sub>3</sub>)

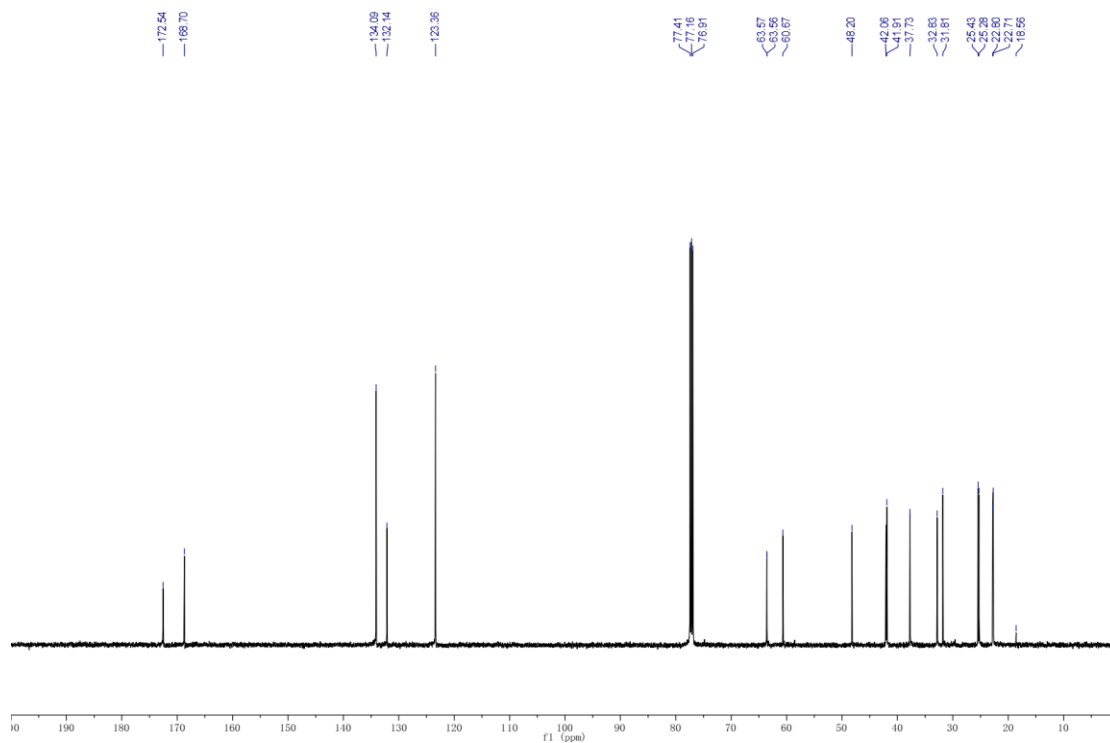

<sup>13</sup>C NMR of compound **53** (126 MHz, CDCl<sub>3</sub>)

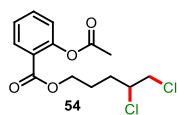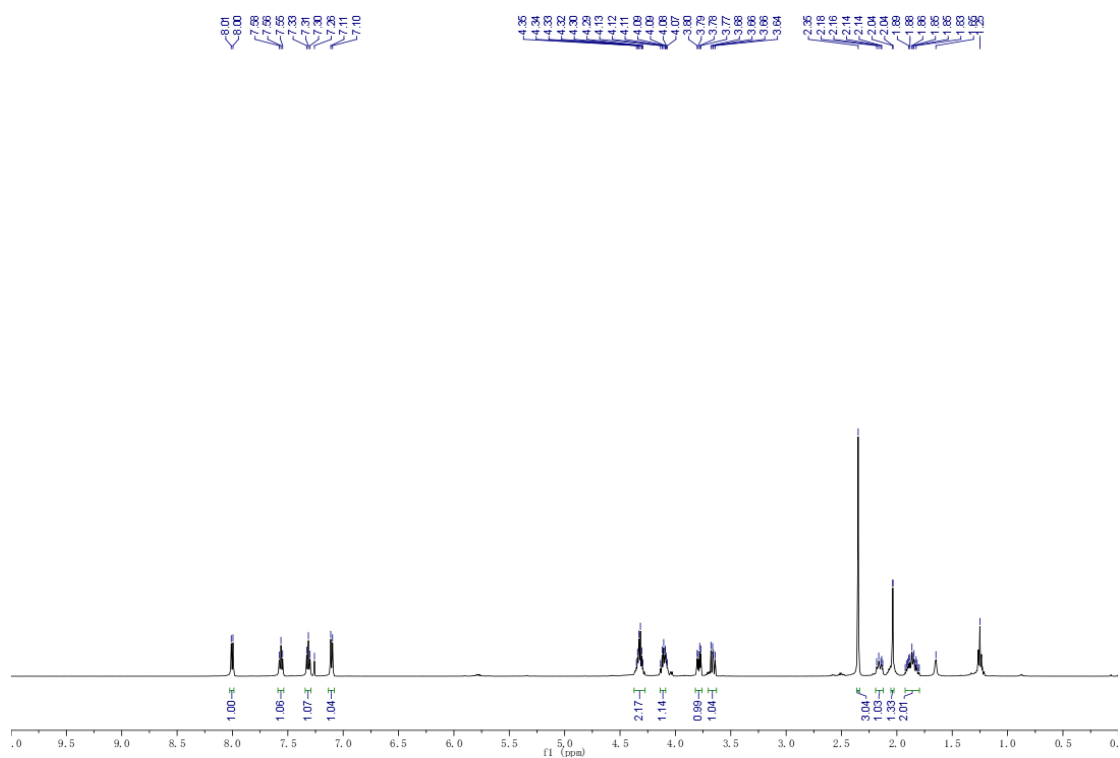

$^1\text{H}$  NMR of compound **54** (500 MHz,  $\text{CDCl}_3$ )

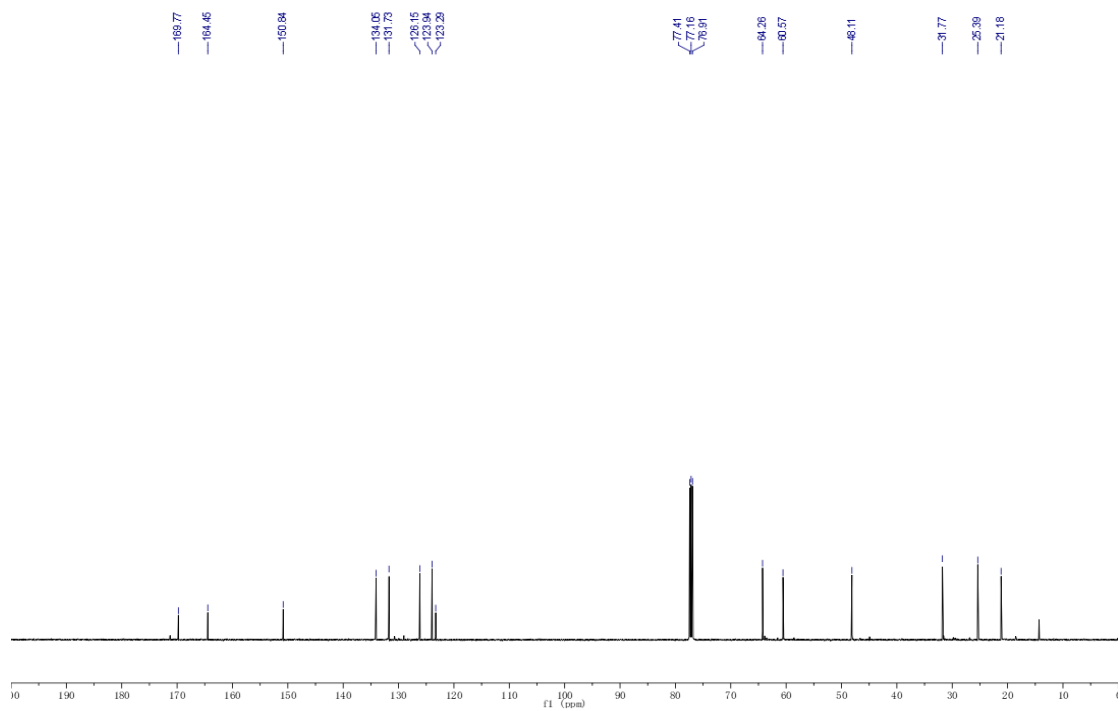

$^{13}\text{C}$  NMR of compound **54** (126 MHz,  $\text{CDCl}_3$ )

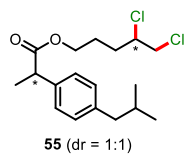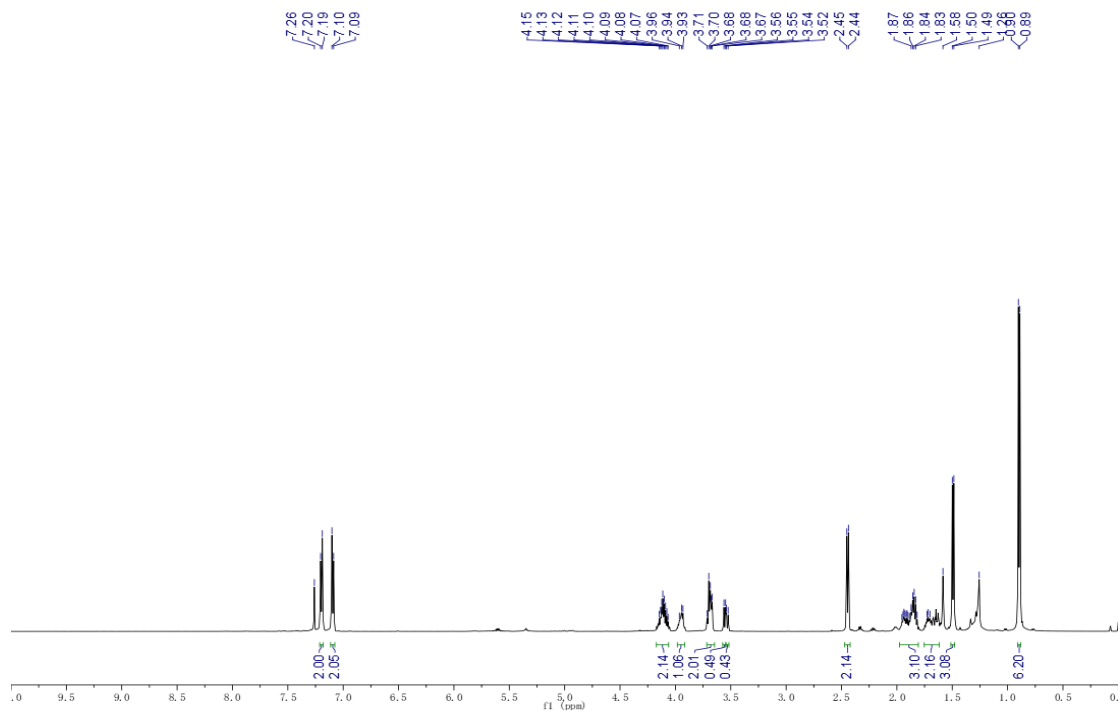

<sup>1</sup>H NMR of compound **55** (500 MHz, CDCl<sub>3</sub>)

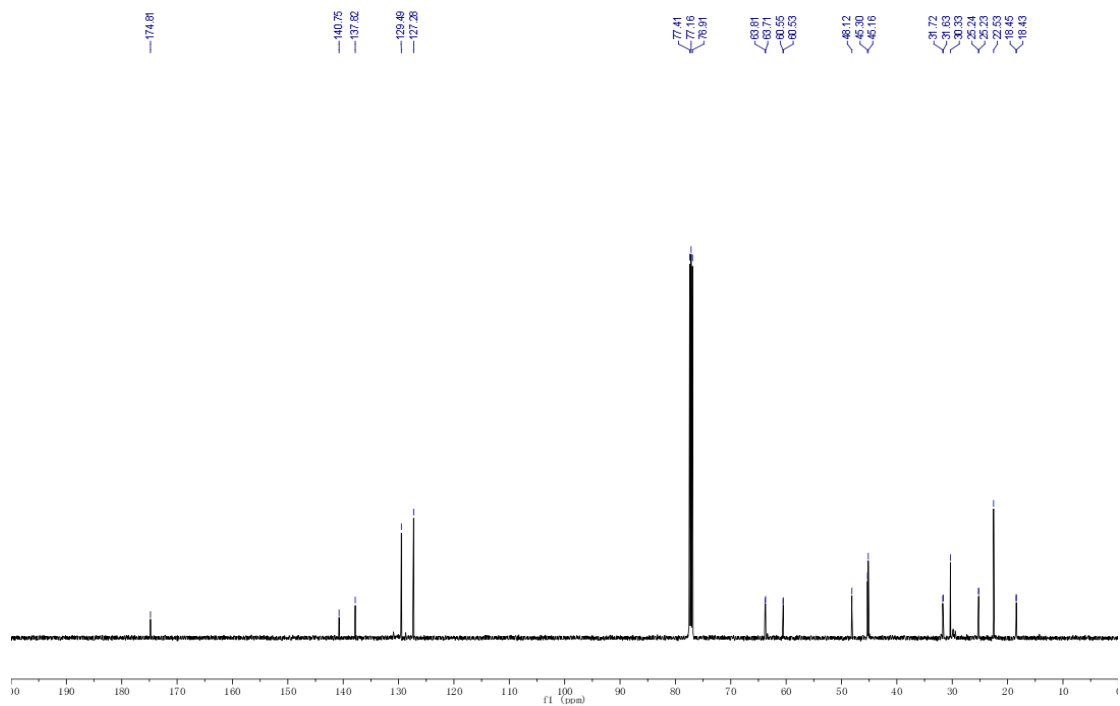

<sup>13</sup>C NMR of compound **55** (126 MHz, CDCl<sub>3</sub>)

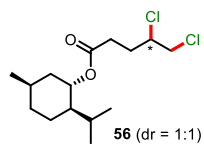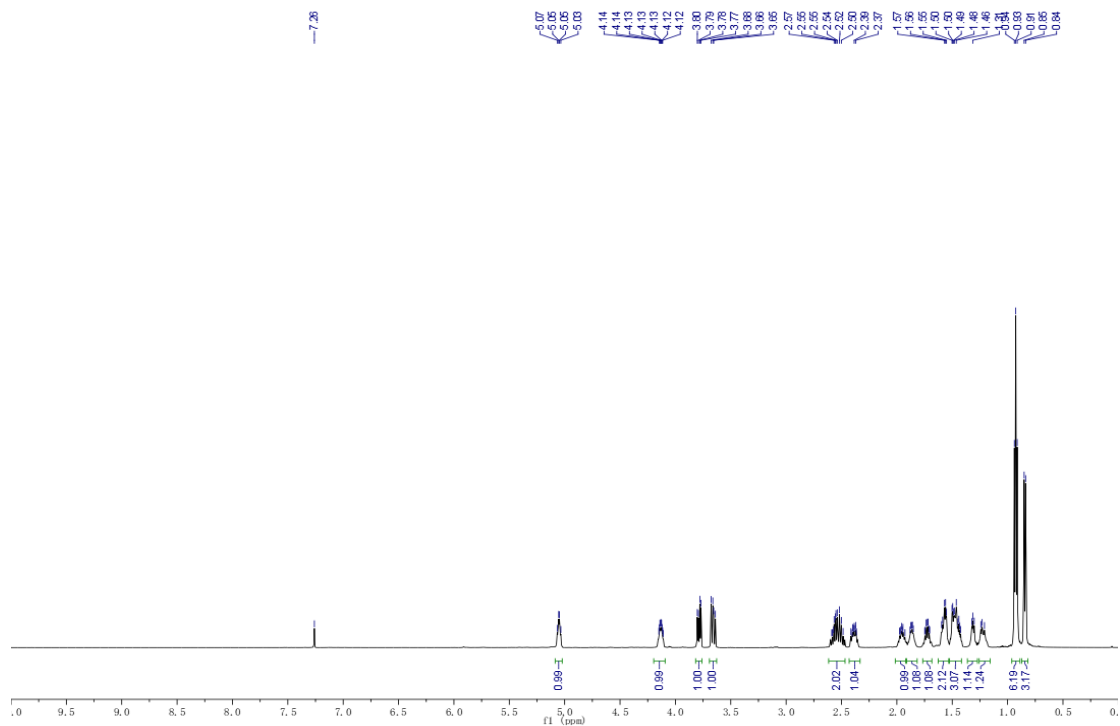

**<sup>1</sup>H NMR of compound 56 (500 MHz, CDCl<sub>3</sub>)**

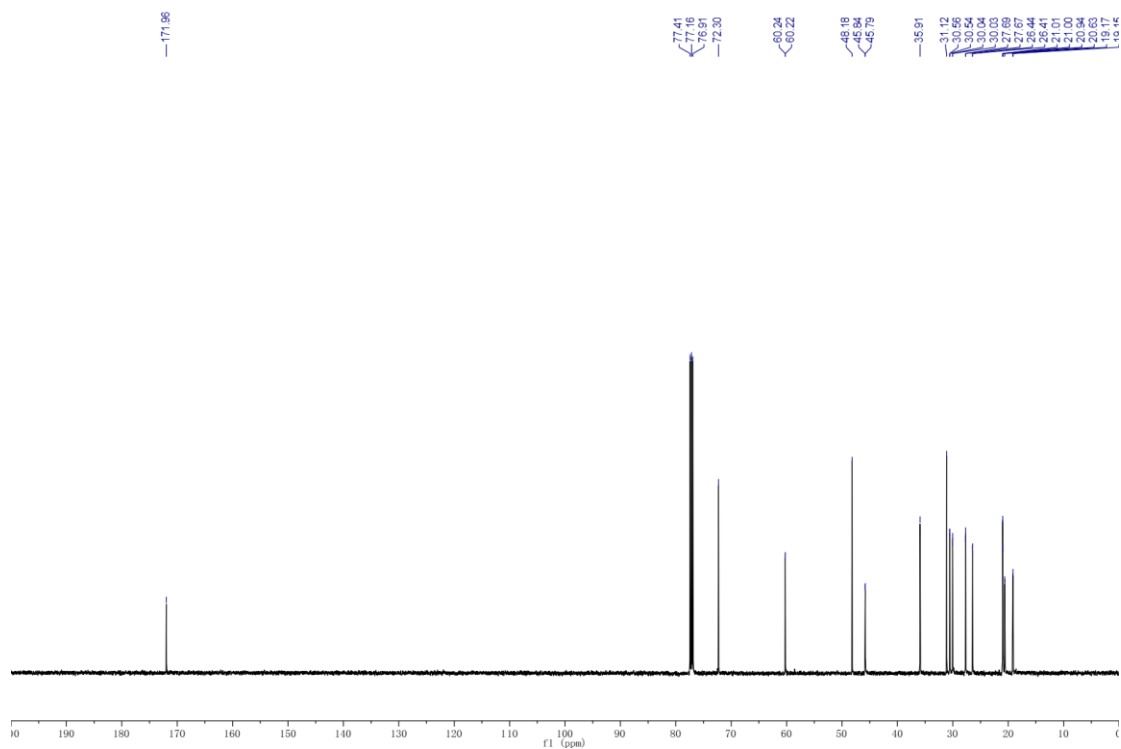

**<sup>13</sup>C NMR of compound 56 (126 MHz, CDCl<sub>3</sub>)**

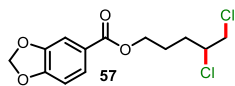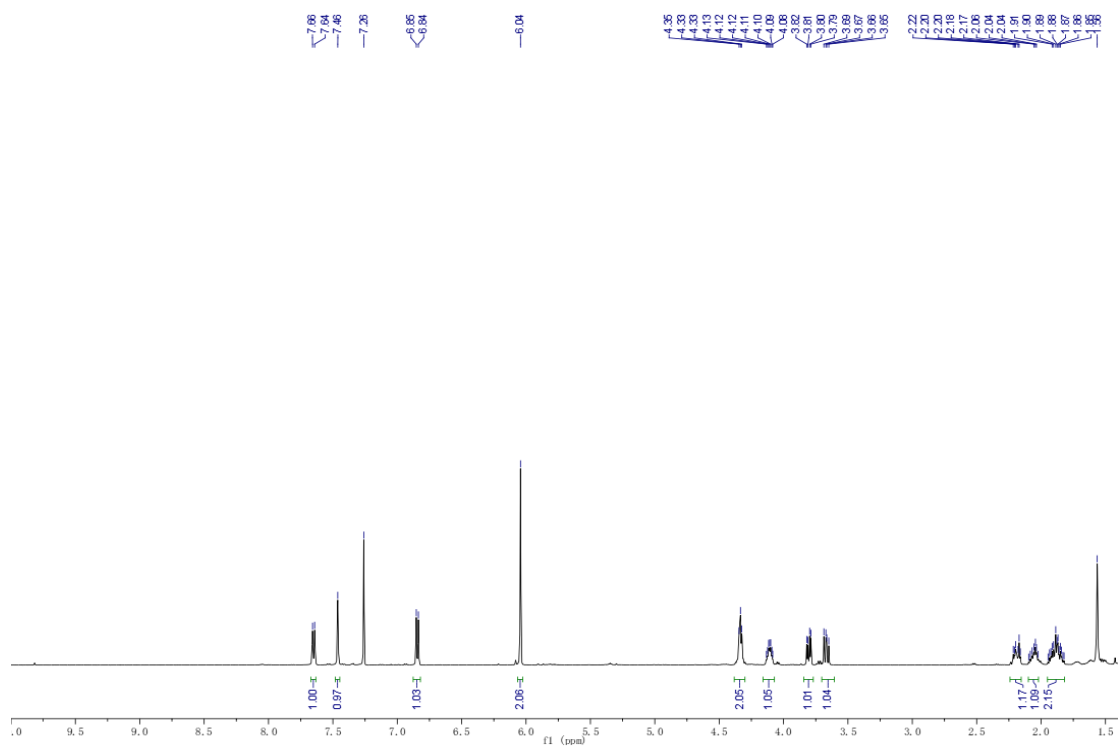

<sup>1</sup>H NMR of compound **57** (500 MHz, CDCl<sub>3</sub>)

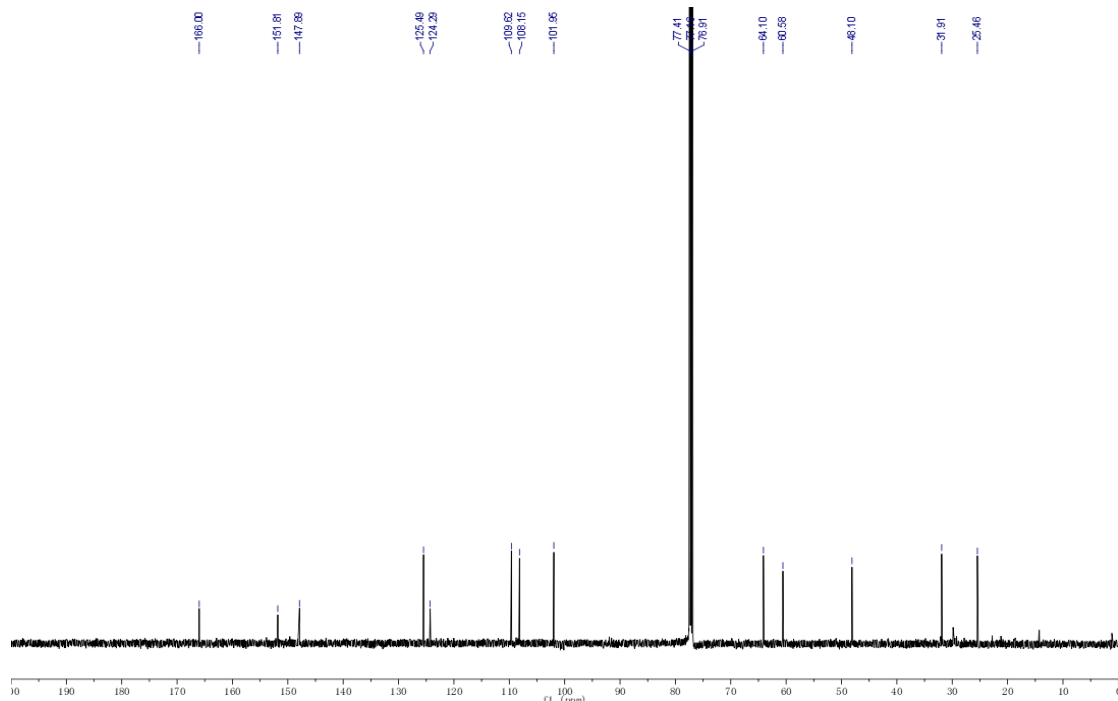

<sup>13</sup>C NMR of compound **57** (126 MHz, CDCl<sub>3</sub>)

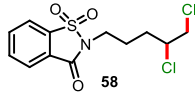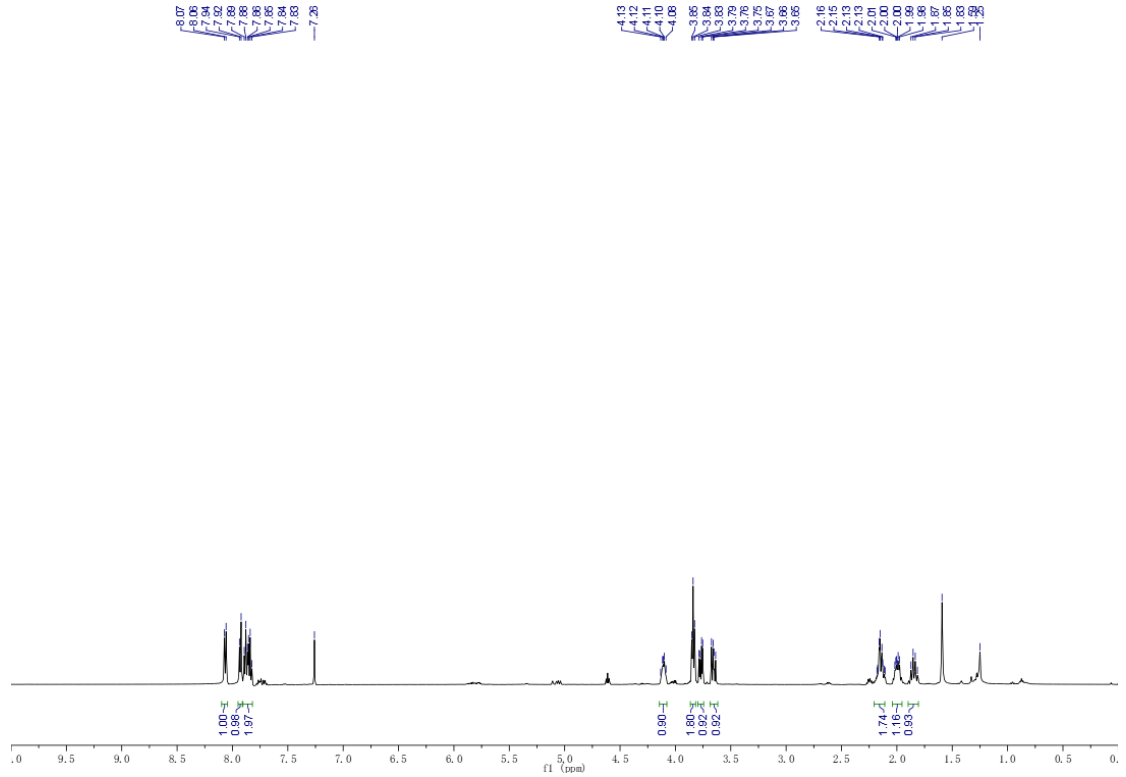

<sup>1</sup>H NMR of compound **58** (500 MHz, CDCl<sub>3</sub>)

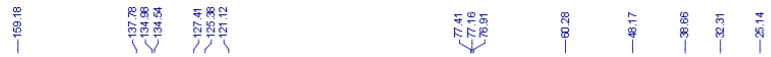

<sup>13</sup>C NMR of compound **58** (126 MHz, CDCl<sub>3</sub>)



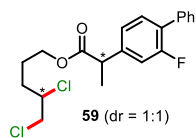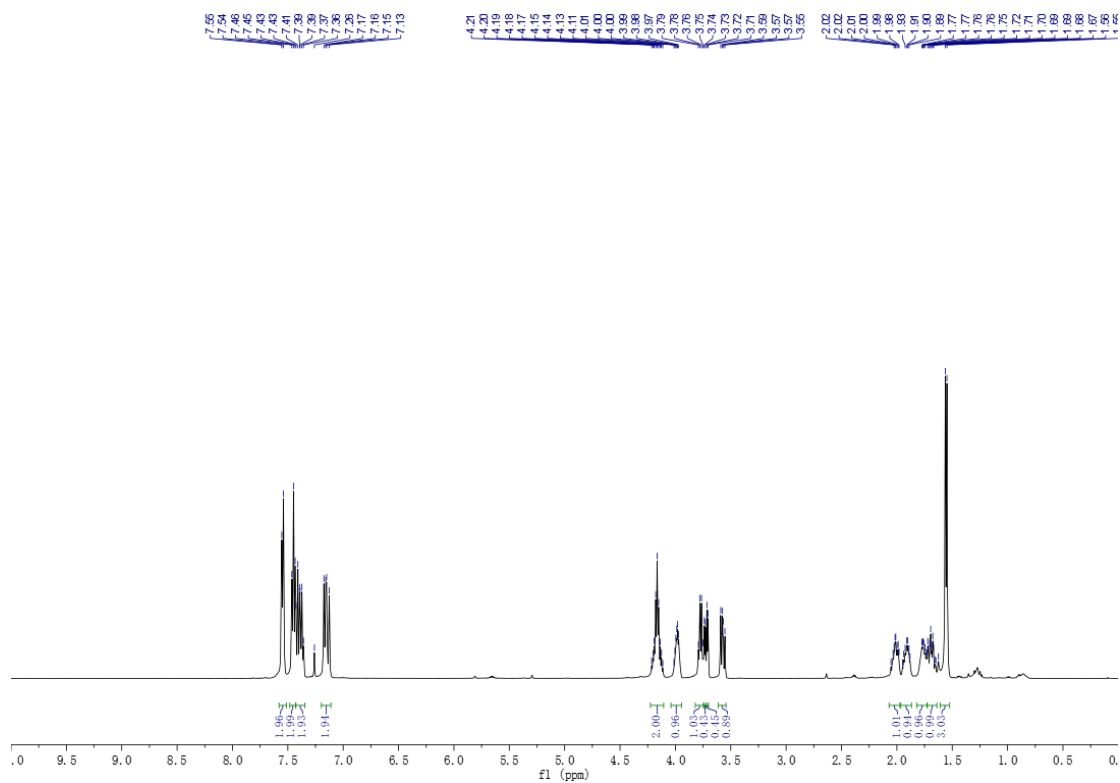

<sup>1</sup>H NMR of compound **59** (500 MHz, CDCl<sub>3</sub>)

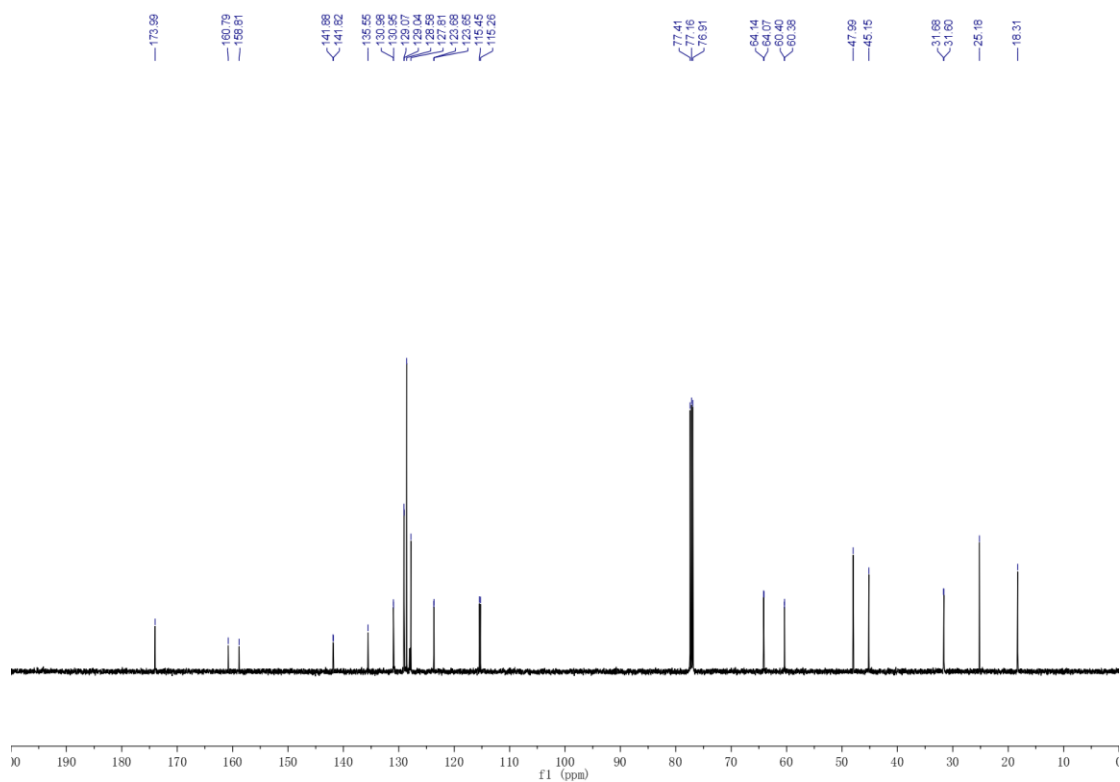

<sup>13</sup>C NMR of compound **59** (126 MHz, CDCl<sub>3</sub>)

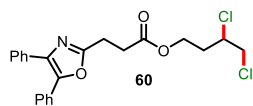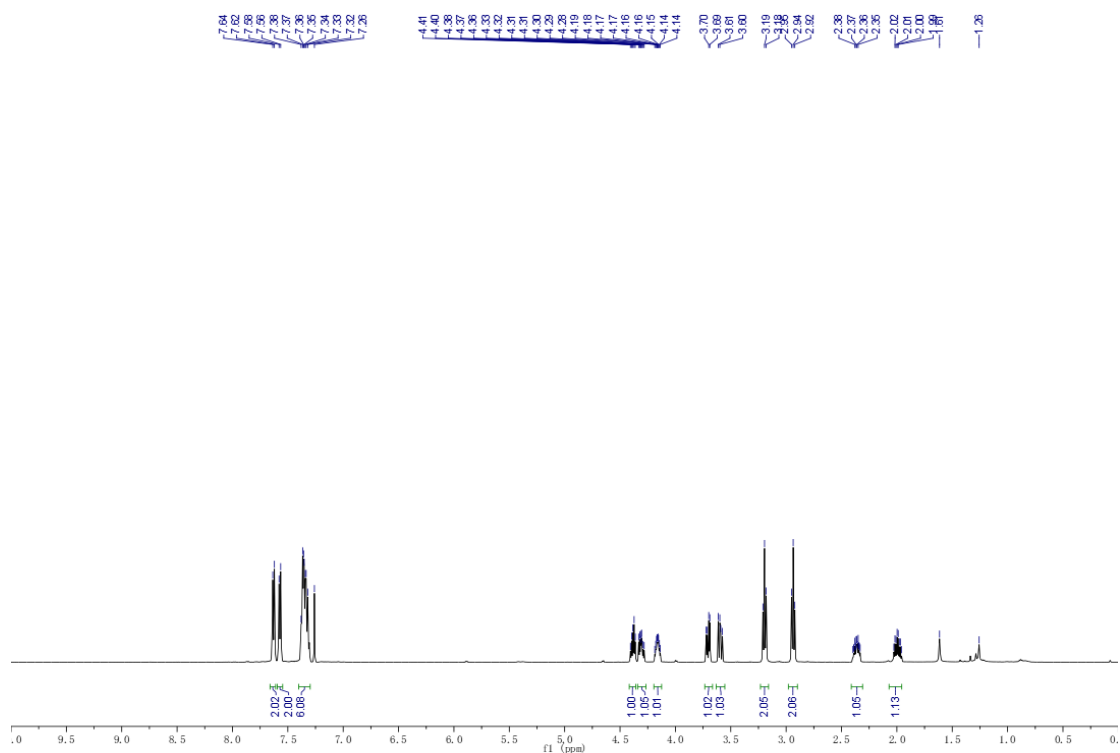

<sup>1</sup>H NMR of compound **60** (500 MHz, CDCl<sub>3</sub>)

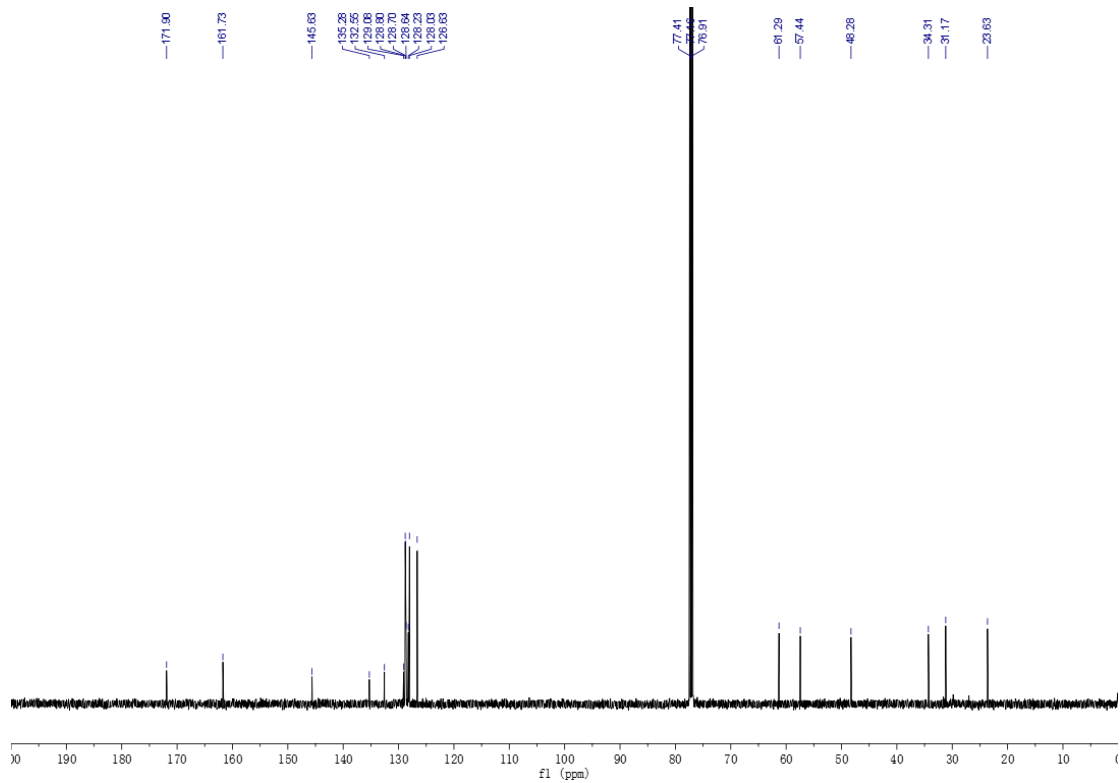

<sup>13</sup>C NMR of compound **60** (126 MHz, CDCl<sub>3</sub>)

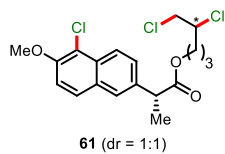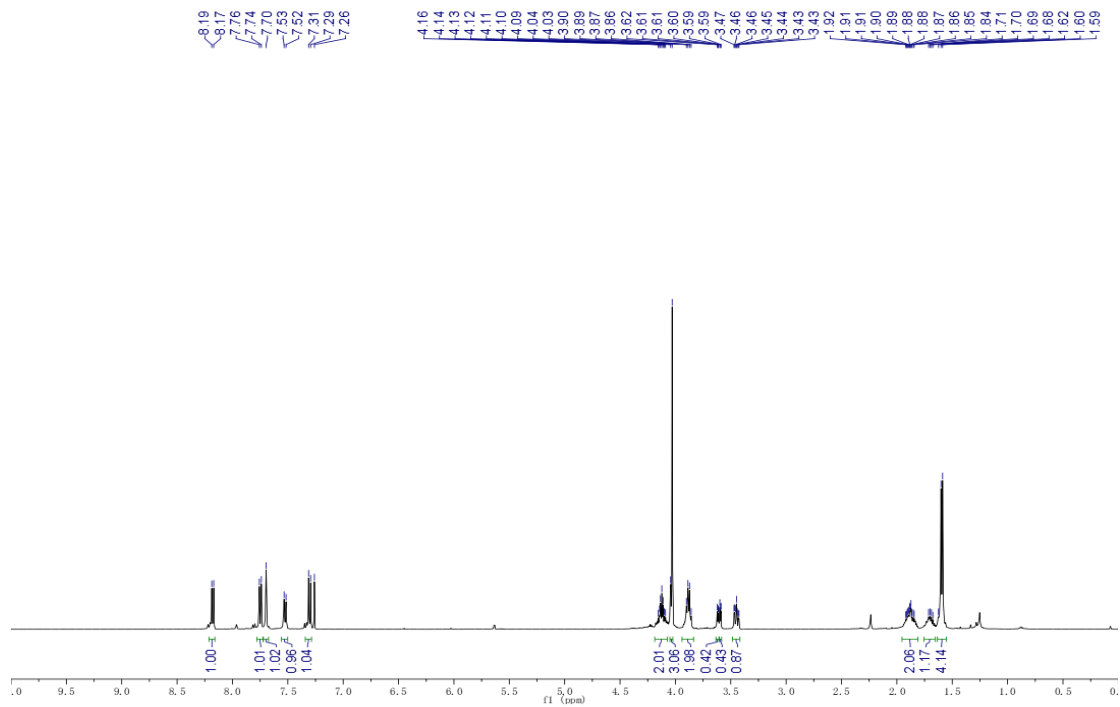

<sup>1</sup>H NMR of compound **61** (500 MHz, CDCl<sub>3</sub>)

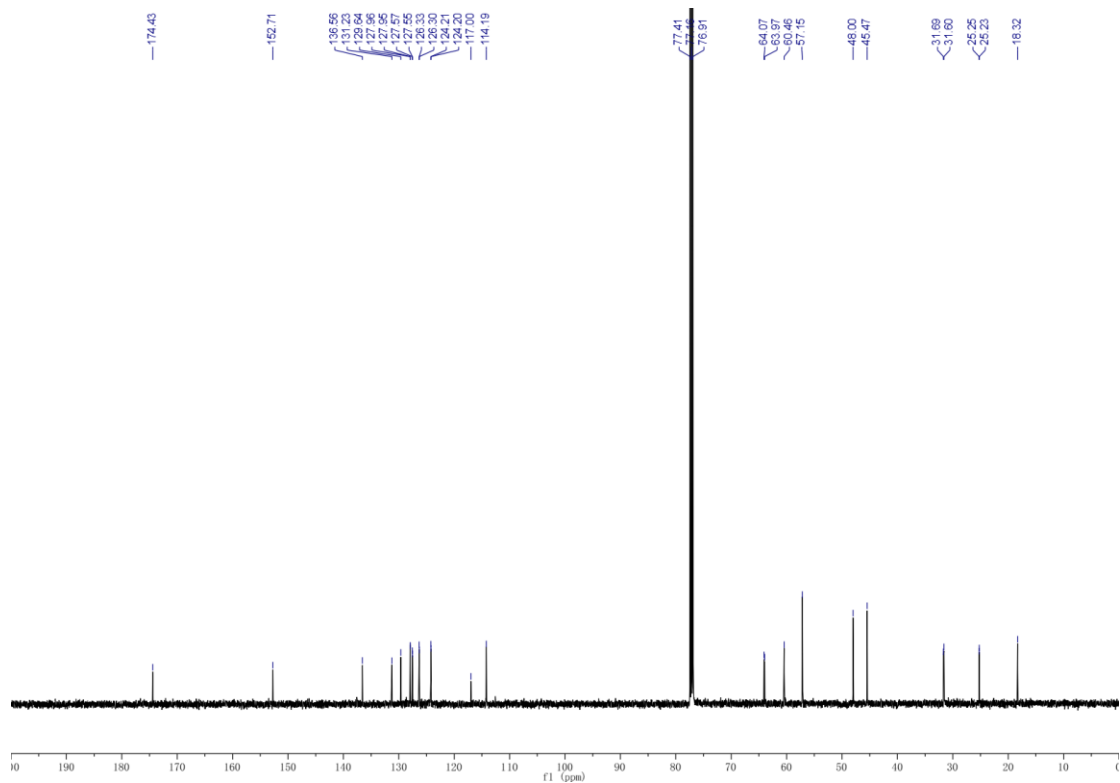

<sup>13</sup>C NMR of compound **61** (126 MHz, CDCl<sub>3</sub>)

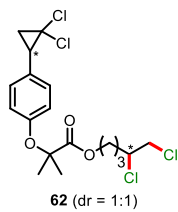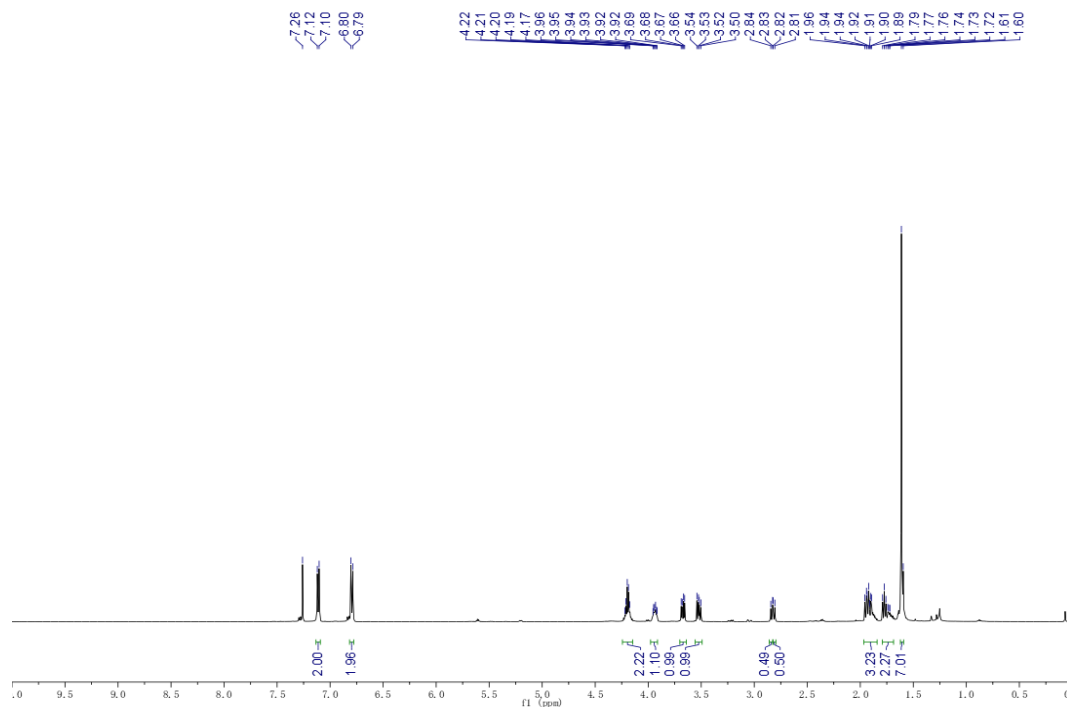

<sup>1</sup>H NMR of compound **62** (500 MHz, CDCl<sub>3</sub>)

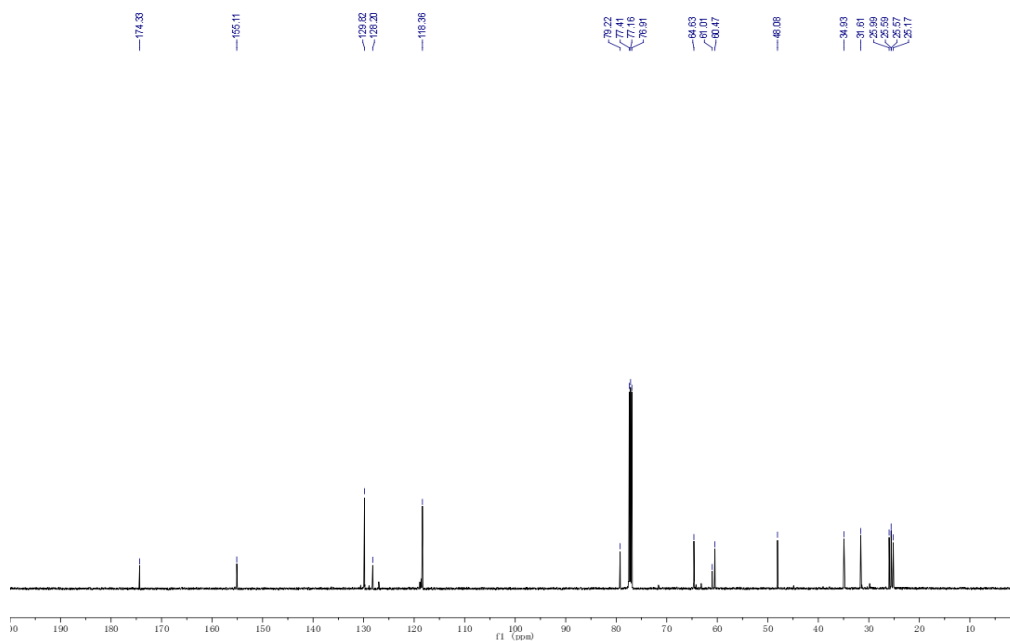

<sup>13</sup>C NMR of compound **62** (126 MHz, CDCl<sub>3</sub>)

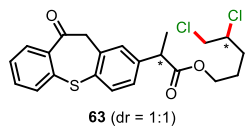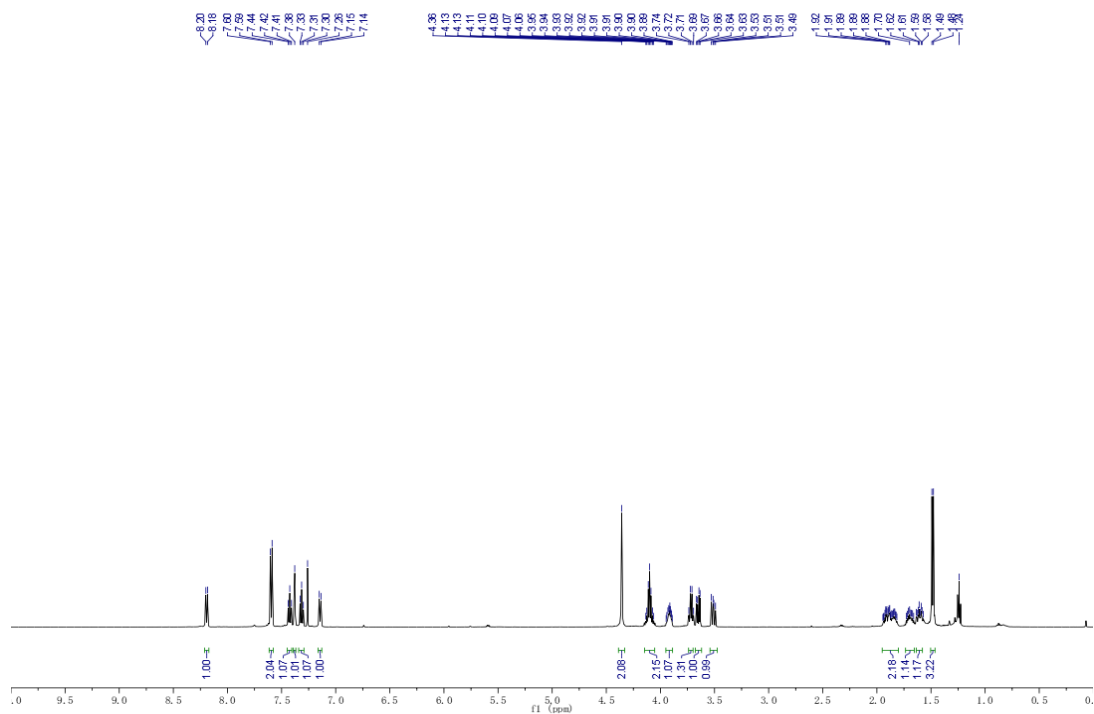

$^1\text{H}$  NMR of compound **63** (500 MHz,  $\text{CDCl}_3$ )

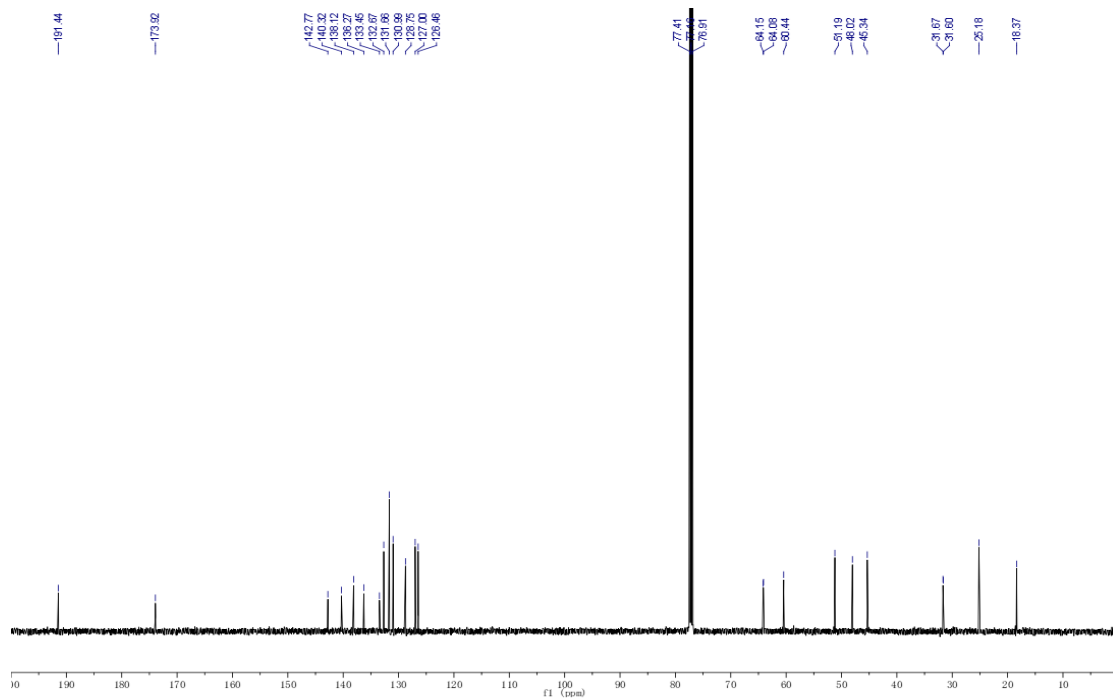

$^{13}\text{C}$  NMR of compound **63** (126 MHz,  $\text{CDCl}_3$ )

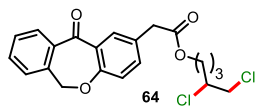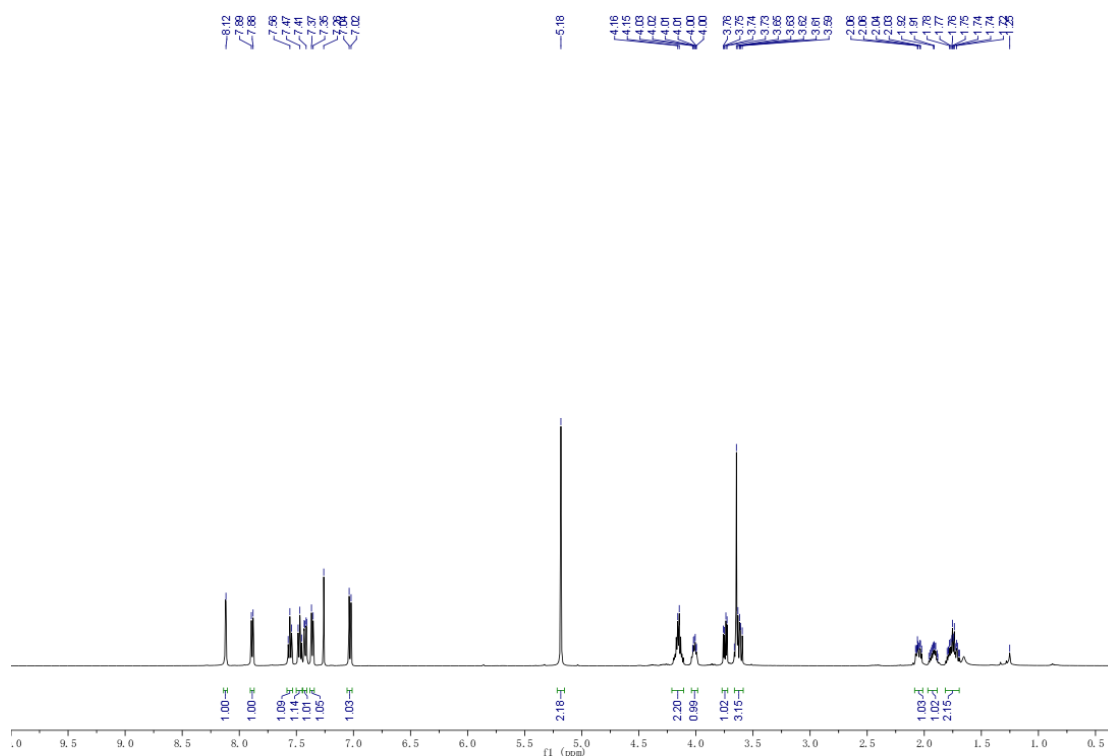

<sup>1</sup>H NMR of compound **64** (500 MHz, CDCl<sub>3</sub>)

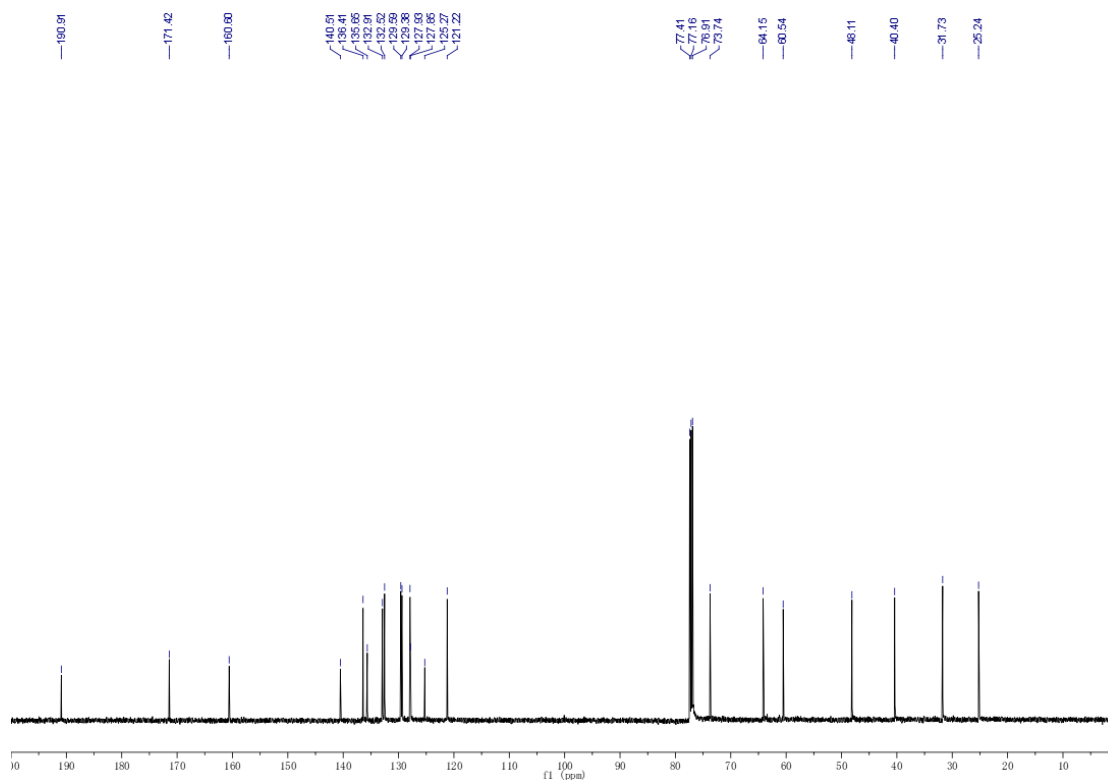

<sup>13</sup>C NMR of compound **64** (126 MHz, CDCl<sub>3</sub>)

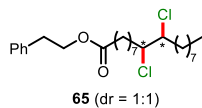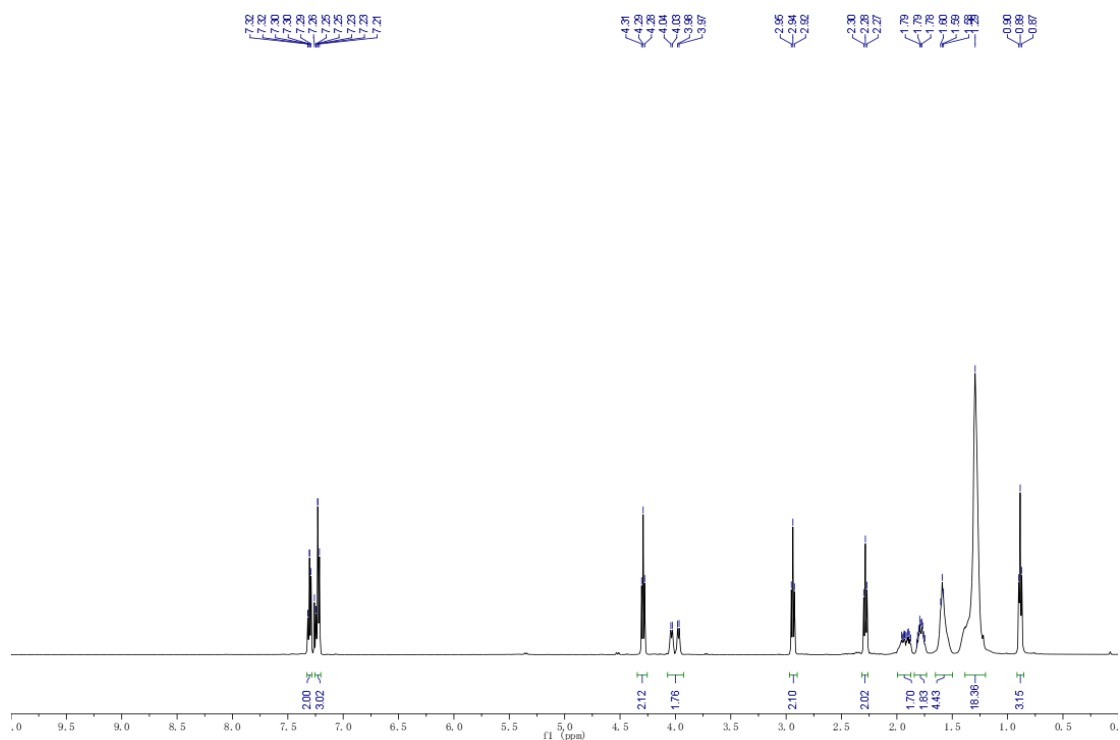

<sup>1</sup>H NMR of compound **65** (500 MHz, CDCl<sub>3</sub>)

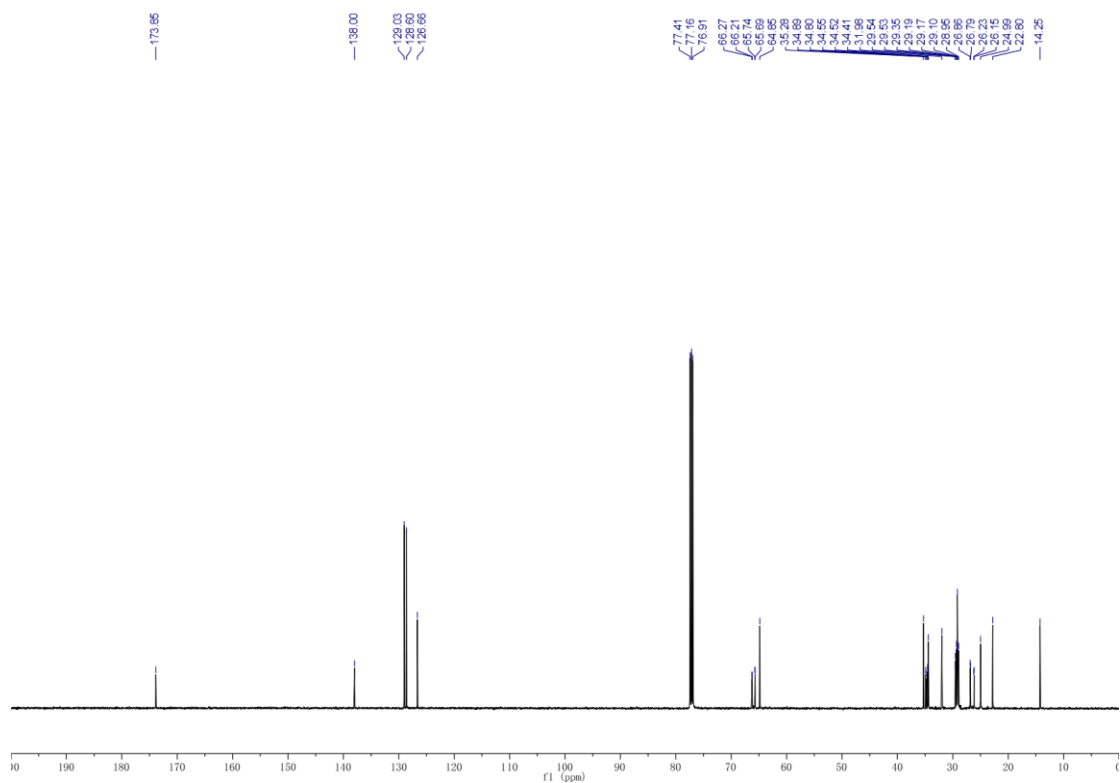

<sup>13</sup>C NMR of compound **65** (126 MHz, CDCl<sub>3</sub>)

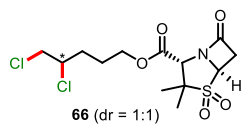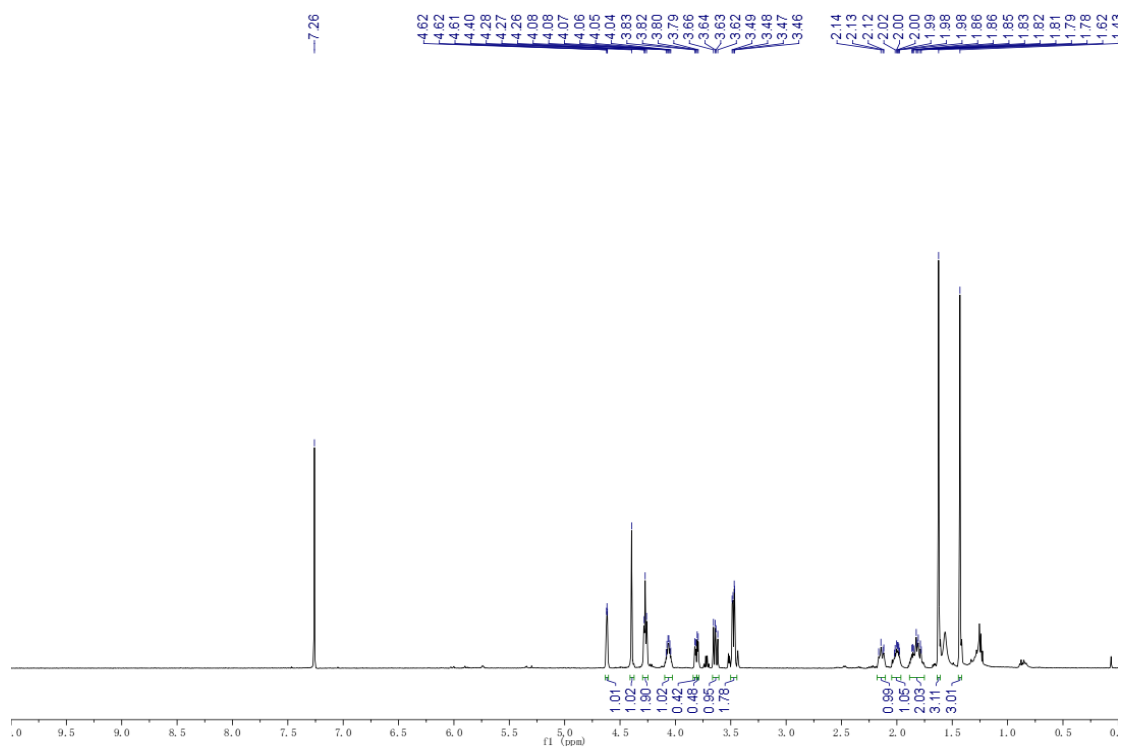

<sup>1</sup>H NMR of compound **66** (500 MHz, CDCl<sub>3</sub>)

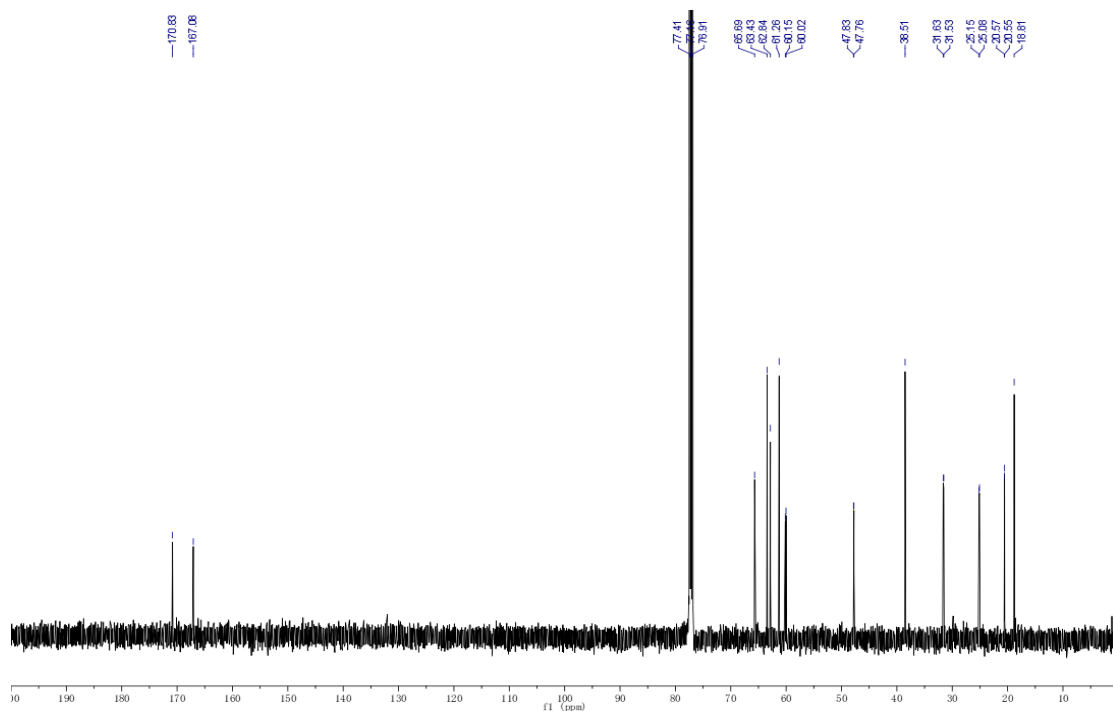

<sup>13</sup>C NMR of compound **66** (126 MHz, CDCl<sub>3</sub>)





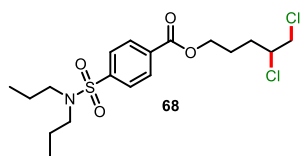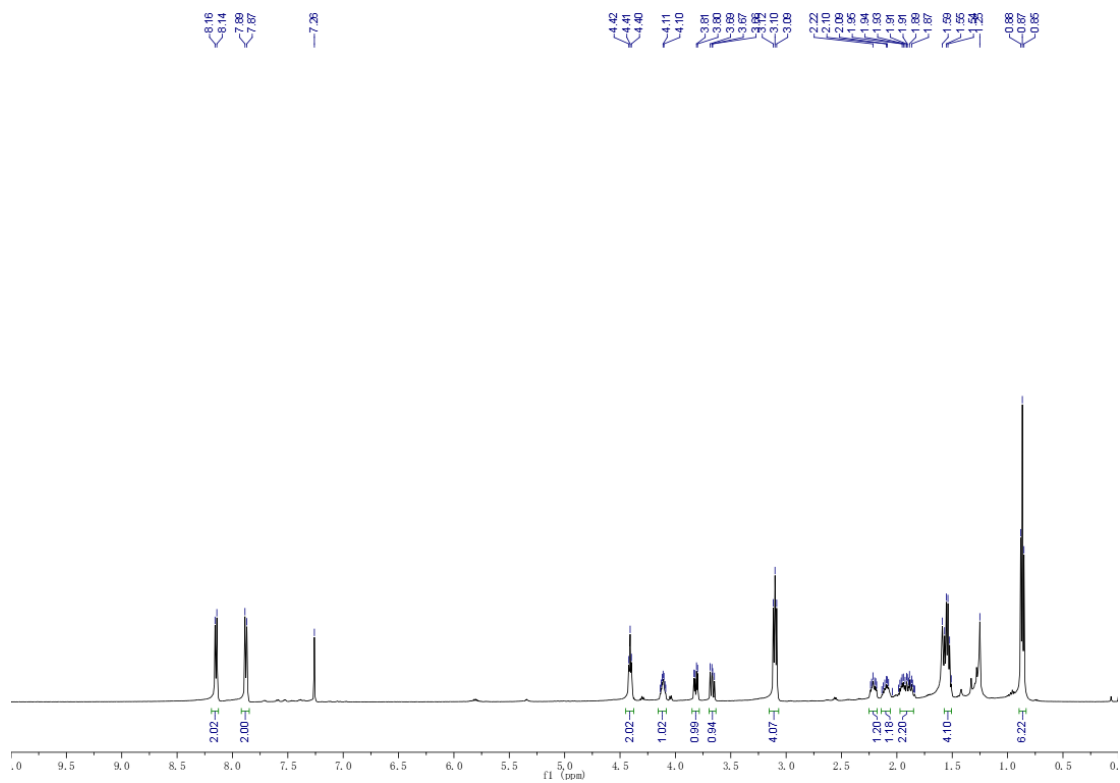

$^1\text{H}$  NMR of compound **68** (500 MHz,  $\text{CDCl}_3$ )

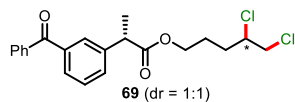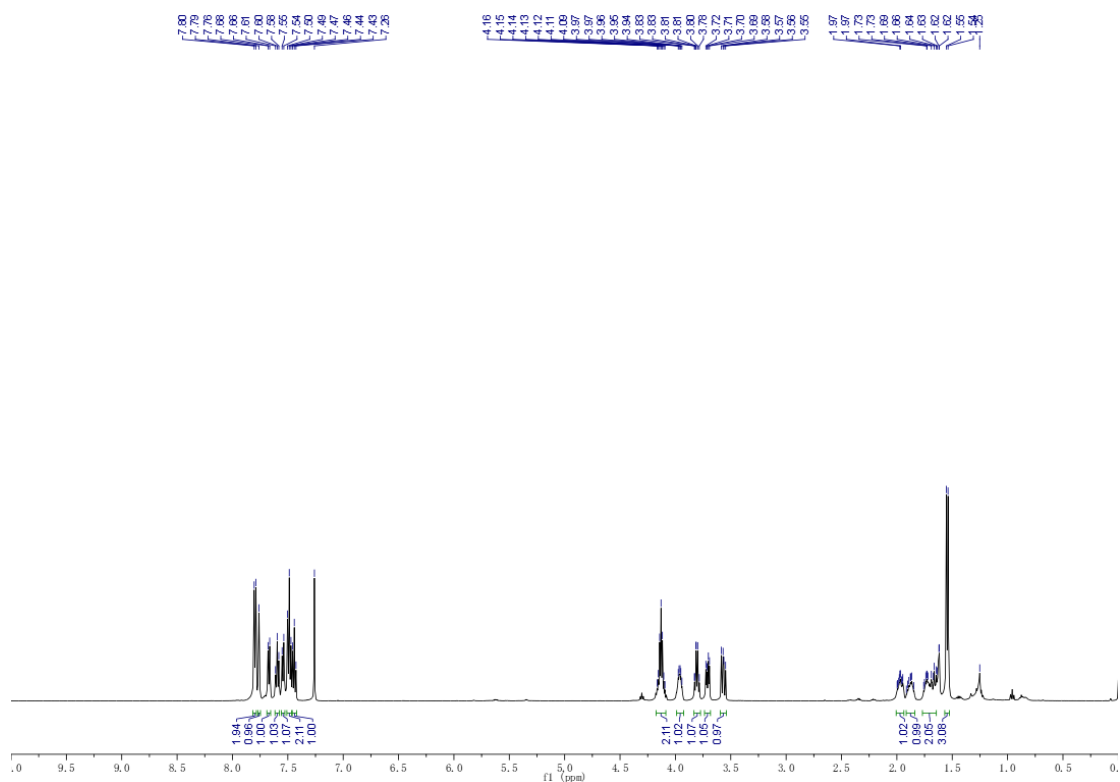

<sup>1</sup>H NMR of compound **69** (500 MHz, CDCl<sub>3</sub>)

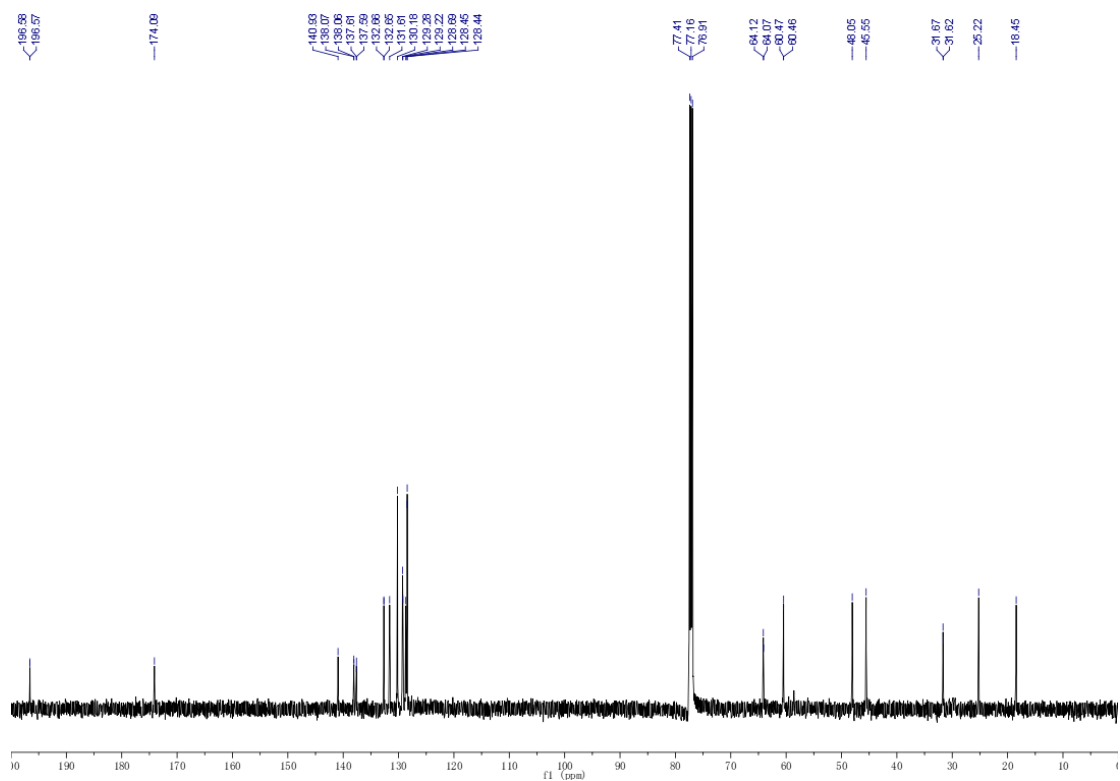

<sup>13</sup>C NMR of compound **69** (126 MHz, CDCl<sub>3</sub>)

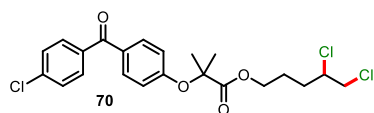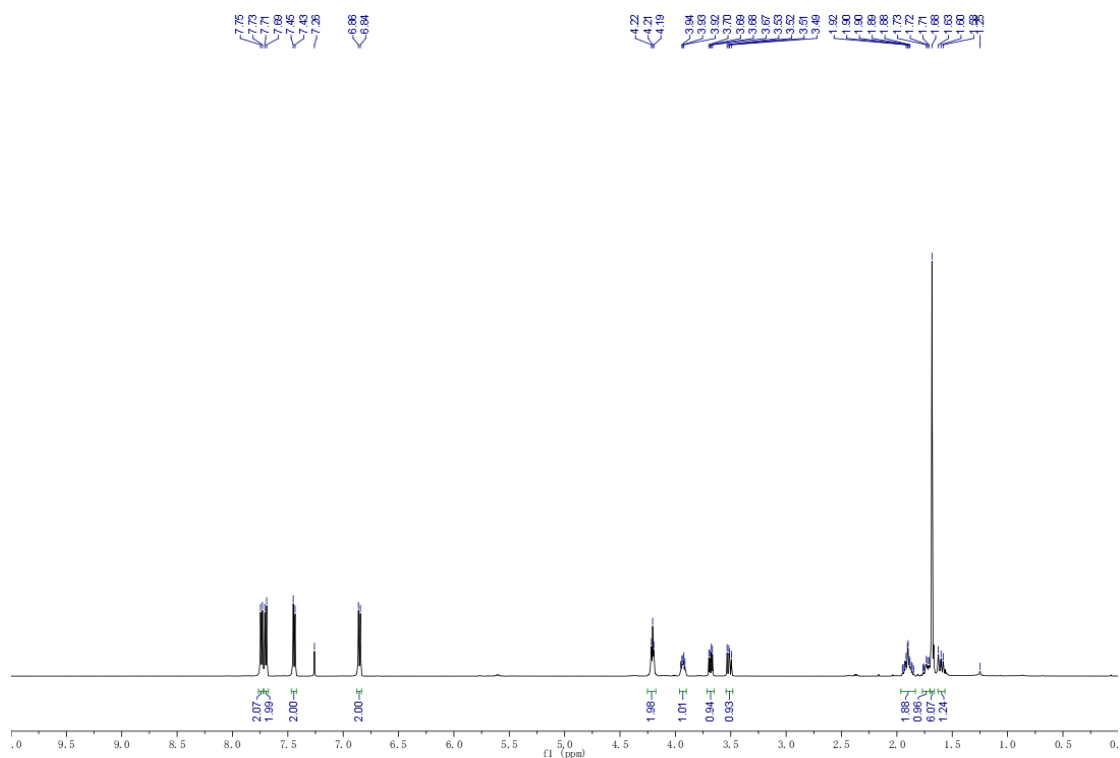

<sup>1</sup>H NMR of compound **70** (500 MHz, CDCl<sub>3</sub>)

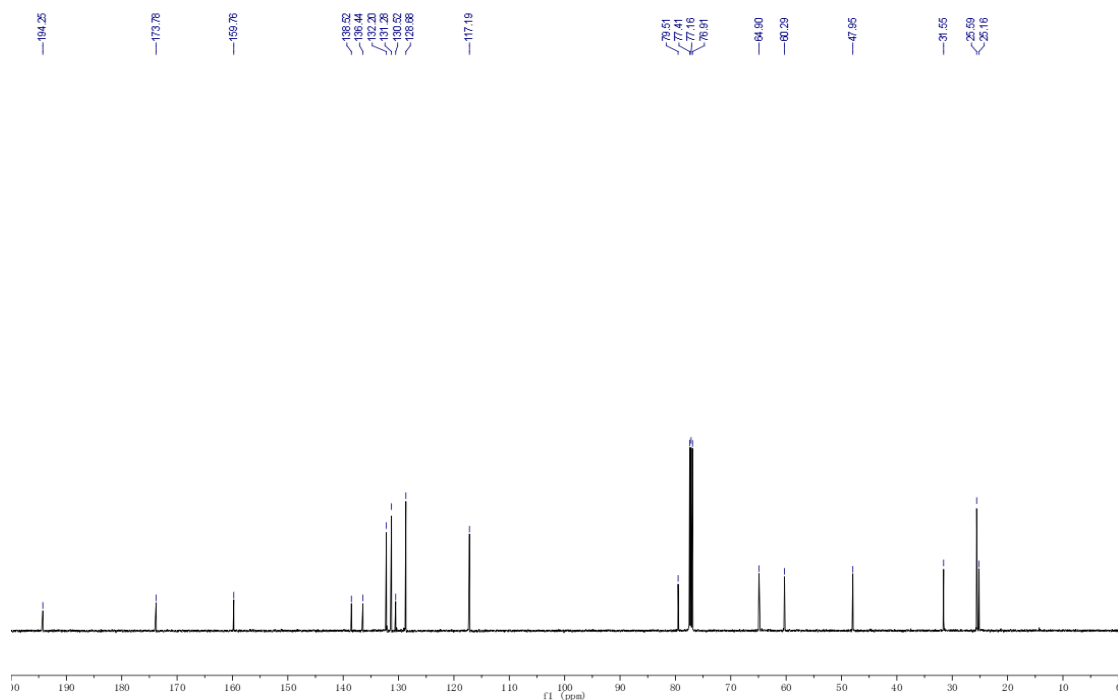

<sup>13</sup>C NMR of compound **70** (126 MHz, CDCl<sub>3</sub>)

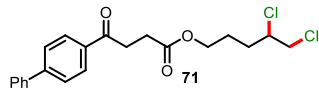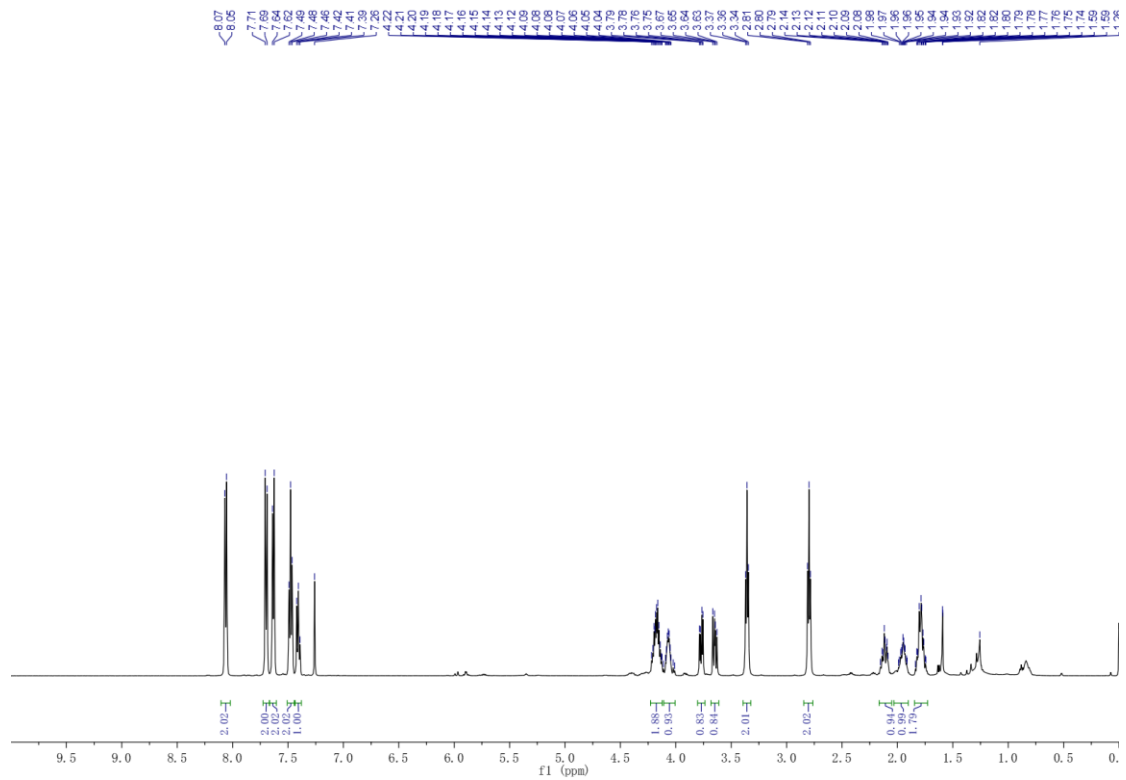

<sup>1</sup>H NMR of compound 71 (500 MHz, CDCl<sub>3</sub>)

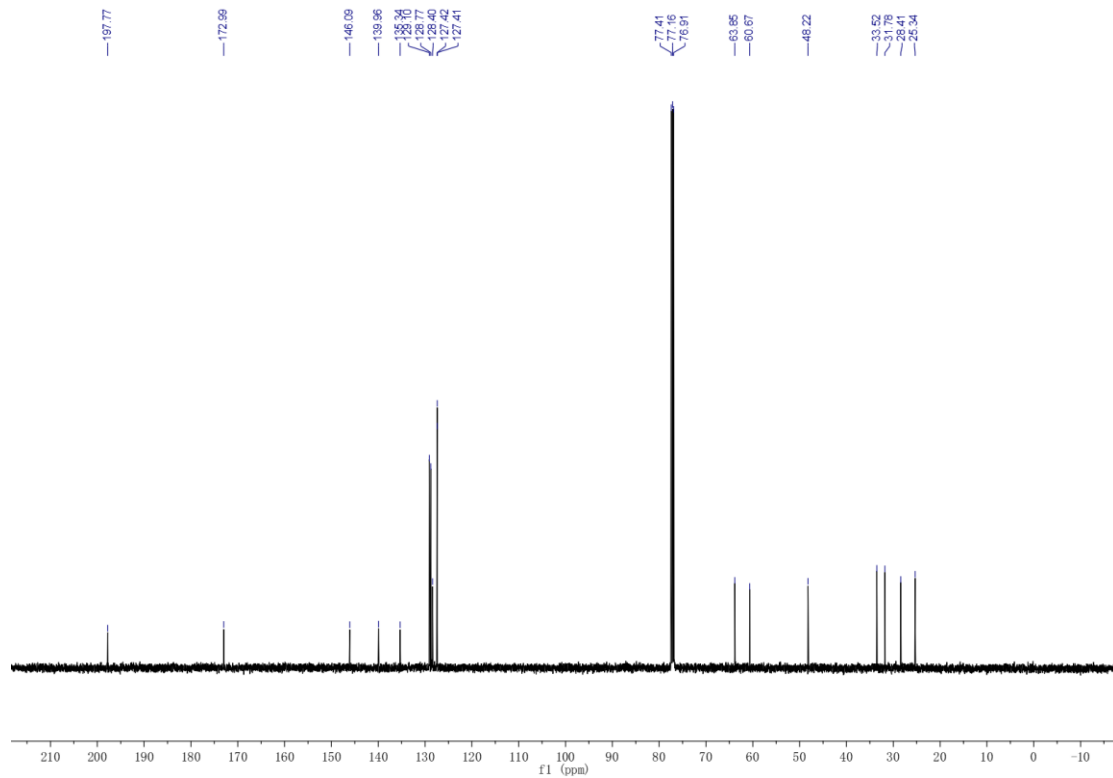

<sup>13</sup>C NMR of compound 71 (126 MHz, CDCl<sub>3</sub>)

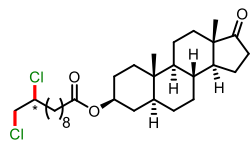

**72** (dr = 1:1)

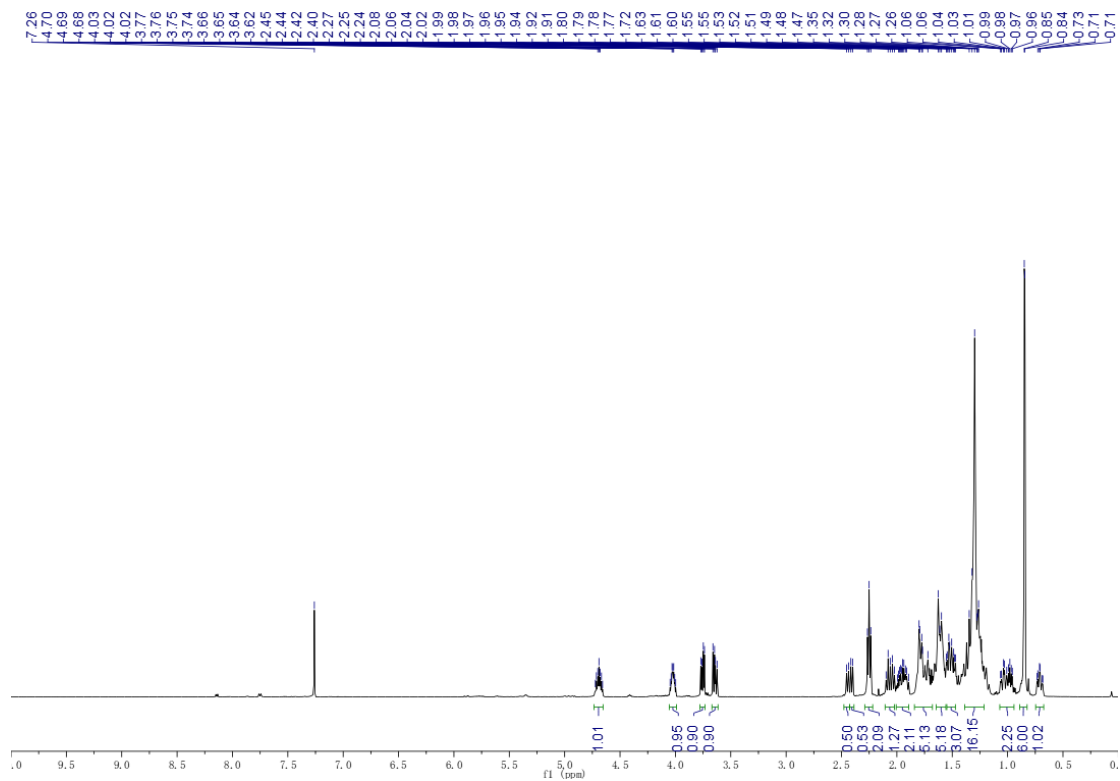

<sup>1</sup>H NMR of compound **72** (500 MHz, CDCl<sub>3</sub>)

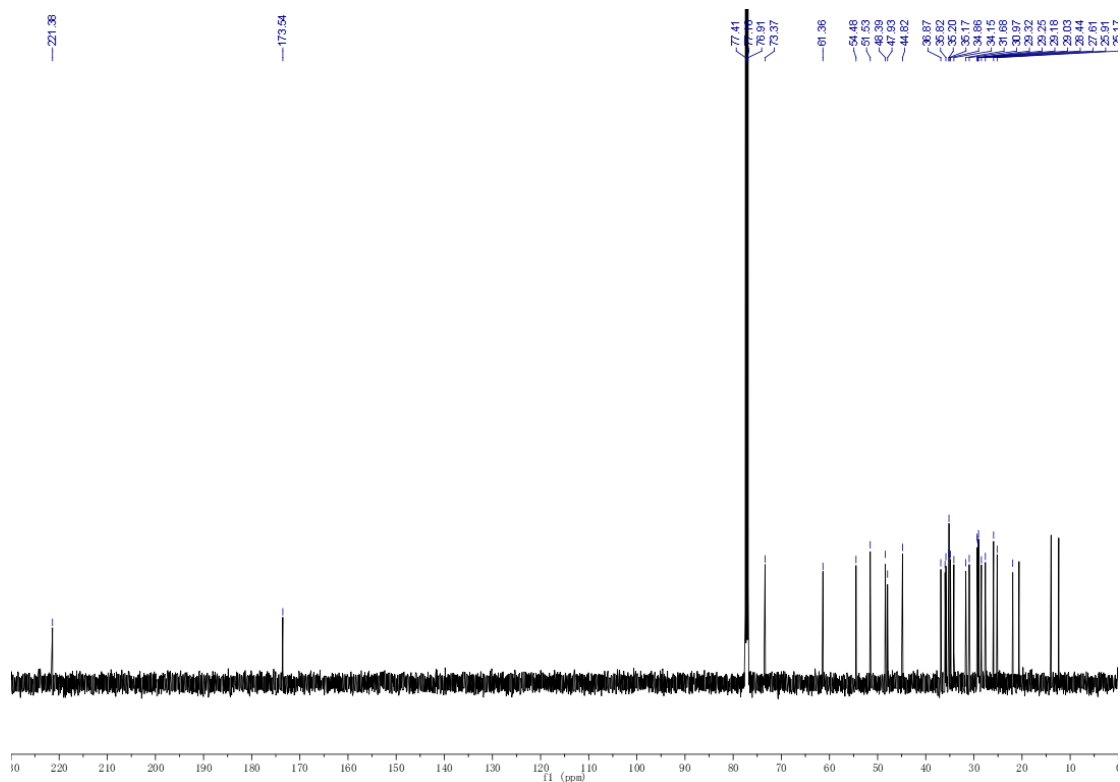

<sup>13</sup>C NMR of compound **72** (126 MHz, CDCl<sub>3</sub>)

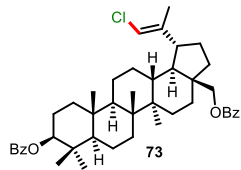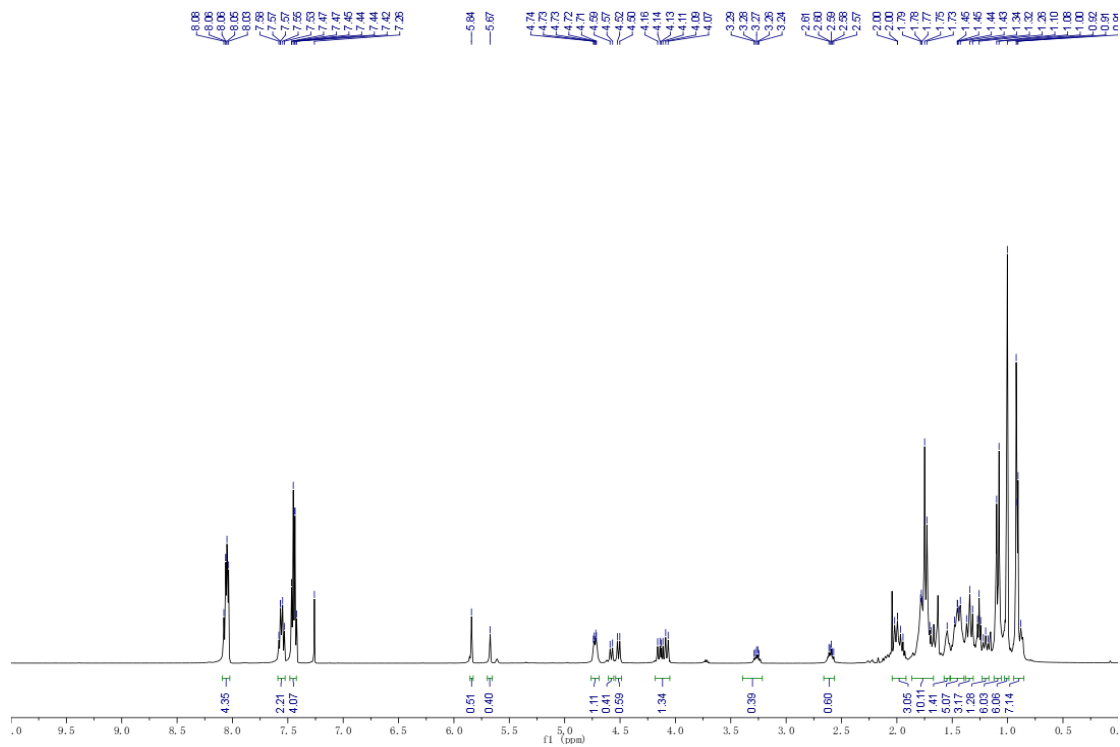

$^1\text{H}$  NMR of compound **73** (500 MHz,  $\text{CDCl}_3$ )

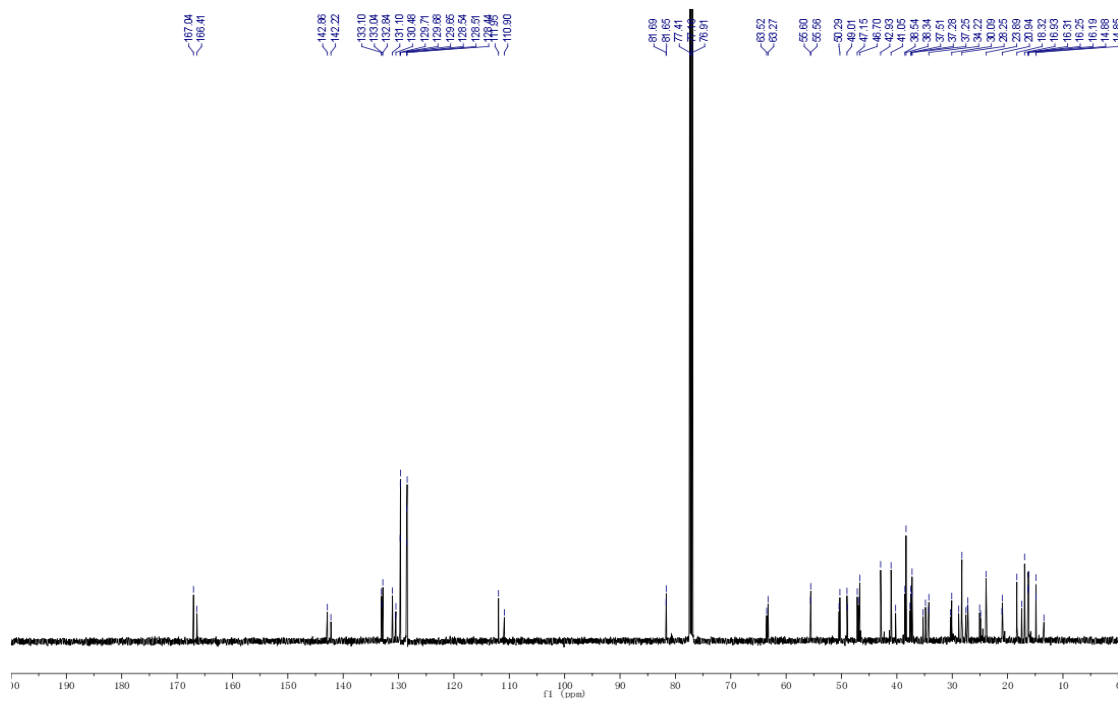

$^{13}\text{C}$  NMR of compound **73** (126 MHz,  $\text{CDCl}_3$ )

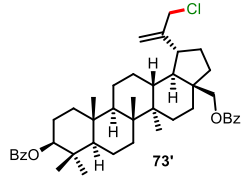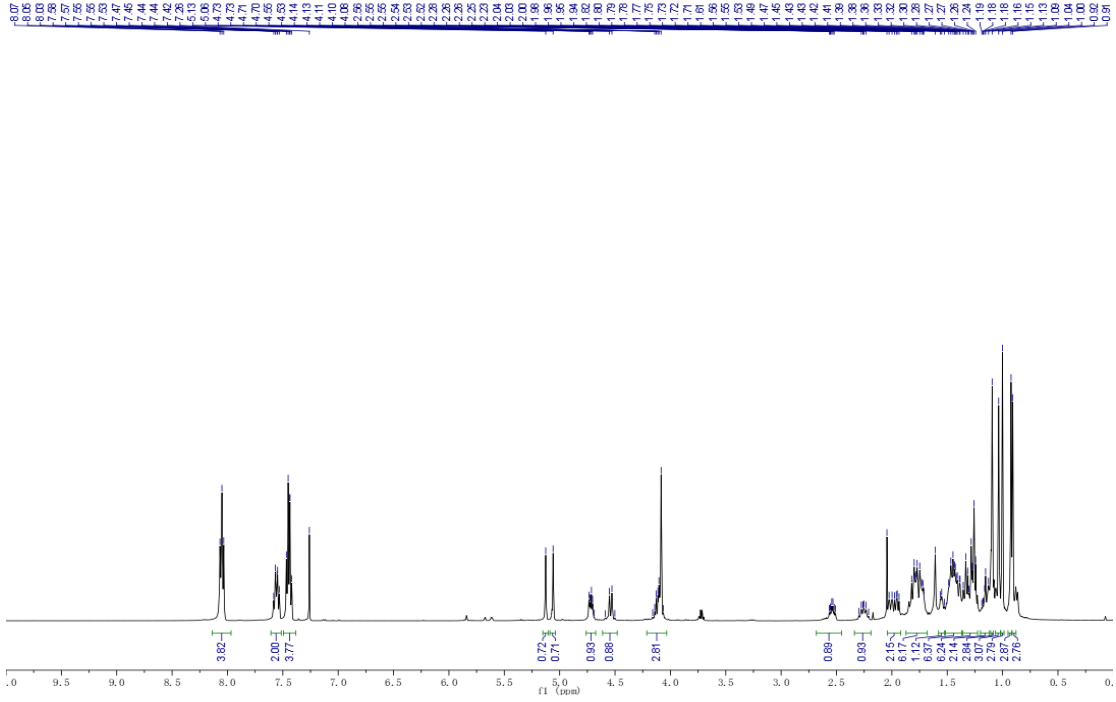

$^1\text{H}$  NMR of compound 73' (500 MHz,  $\text{CDCl}_3$ )

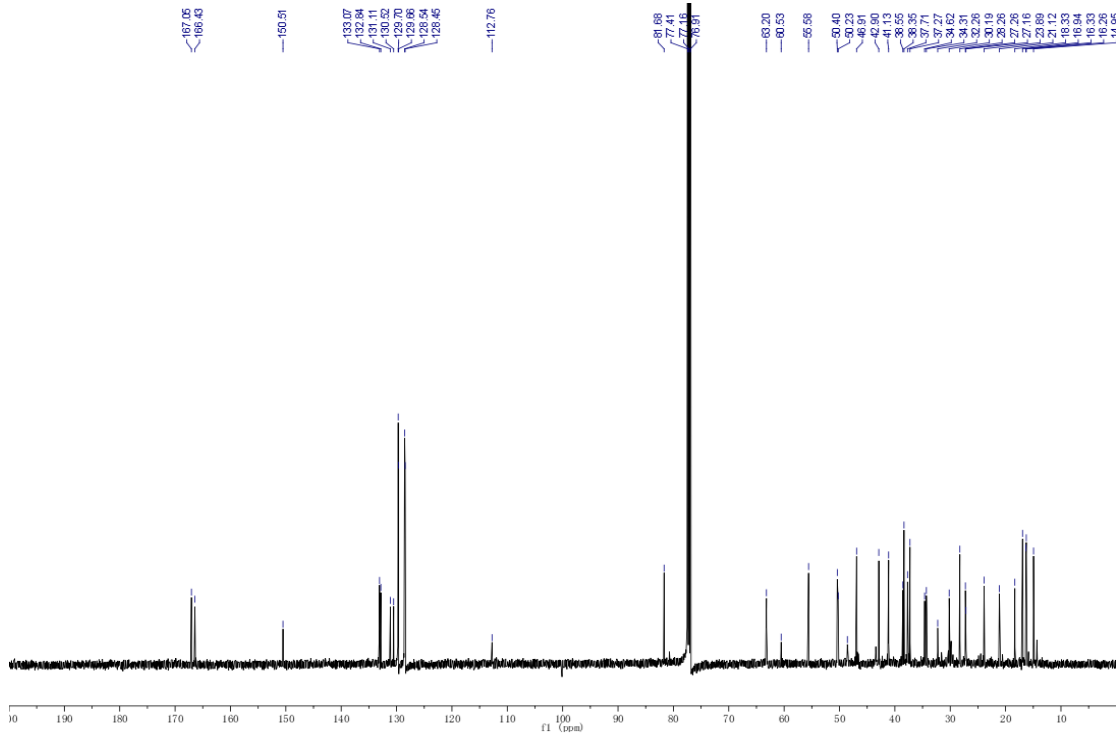

$^{13}\text{C}$  NMR of compound 73' (126 MHz,  $\text{CDCl}_3$ )



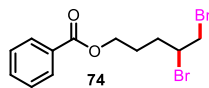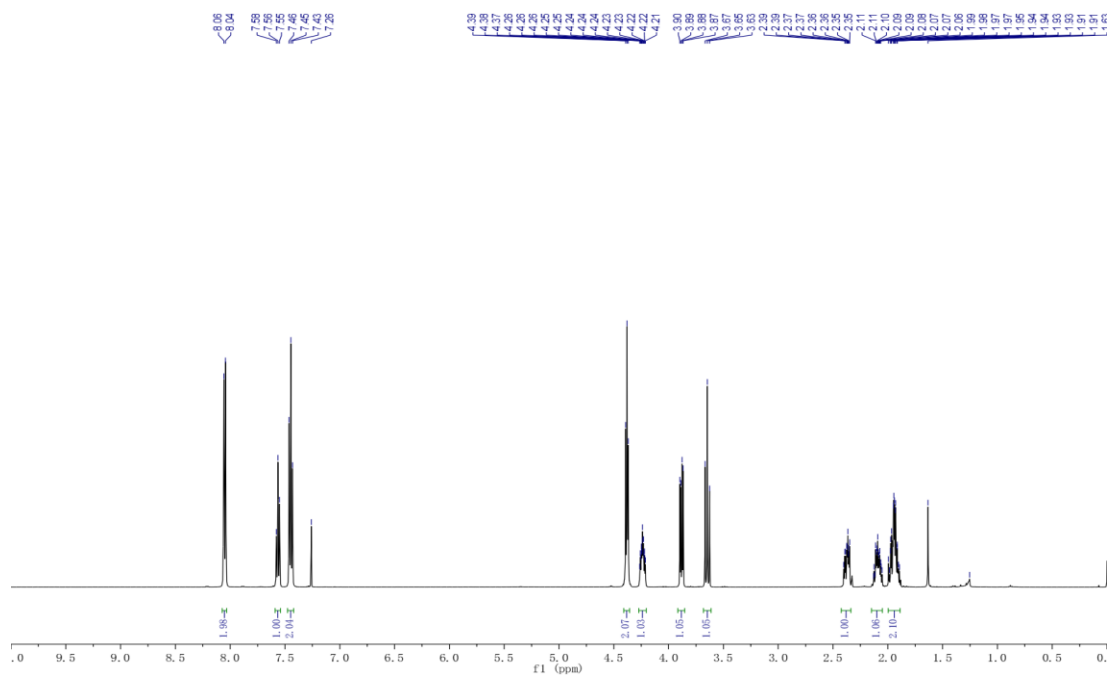

<sup>1</sup>H NMR of compound **74** (500 MHz, CDCl<sub>3</sub>)

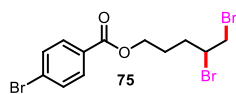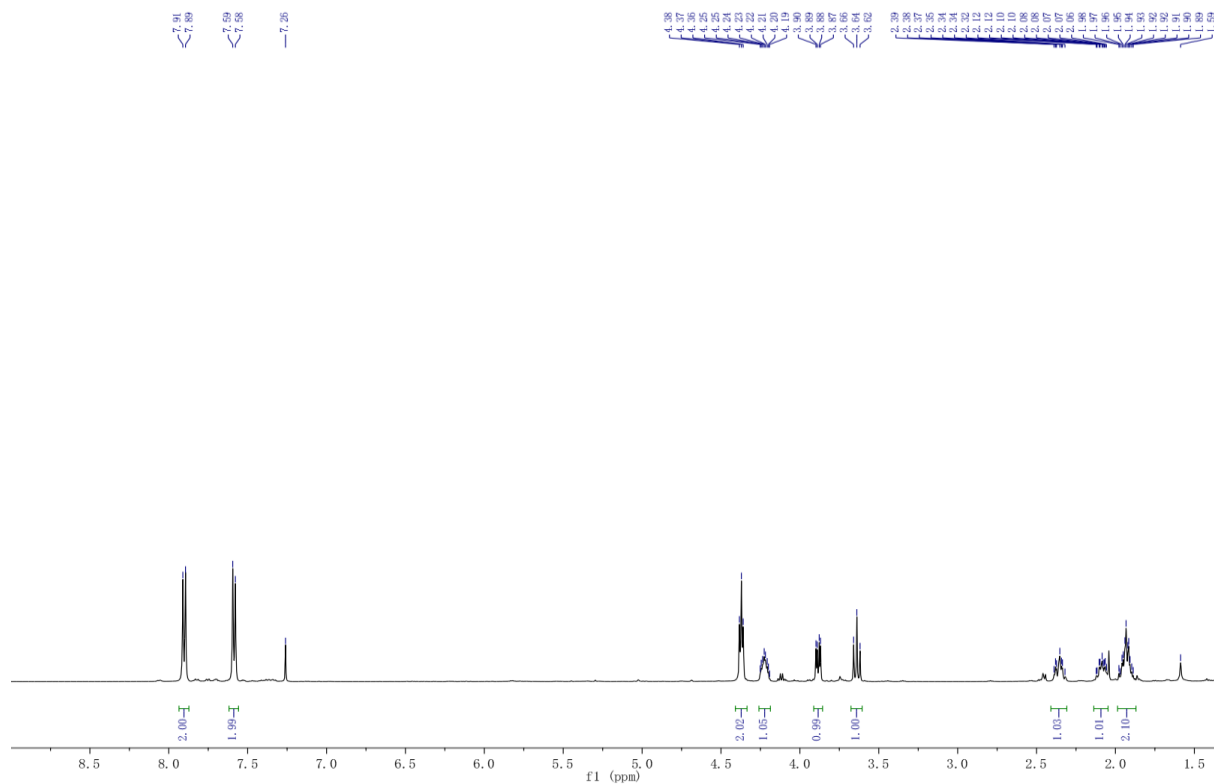

<sup>1</sup>H NMR of compound **75** (500 MHz, CDCl<sub>3</sub>)

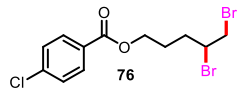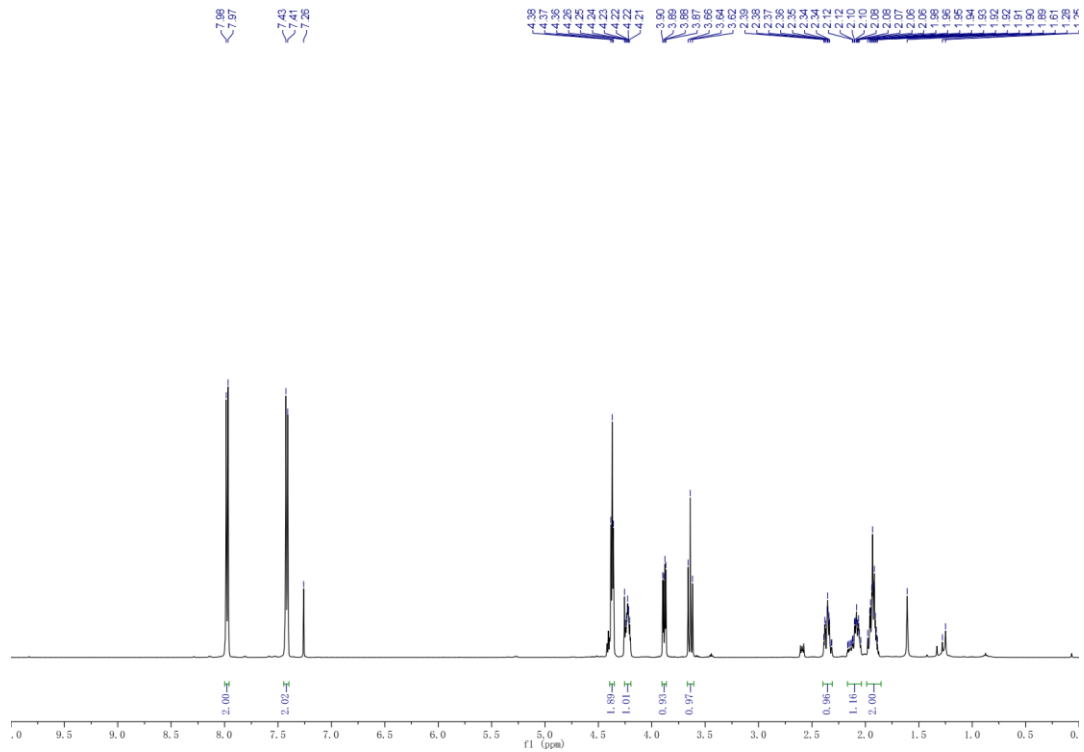

$^1\text{H}$  NMR of compound **76** (500 MHz,  $\text{CDCl}_3$ )

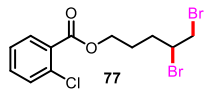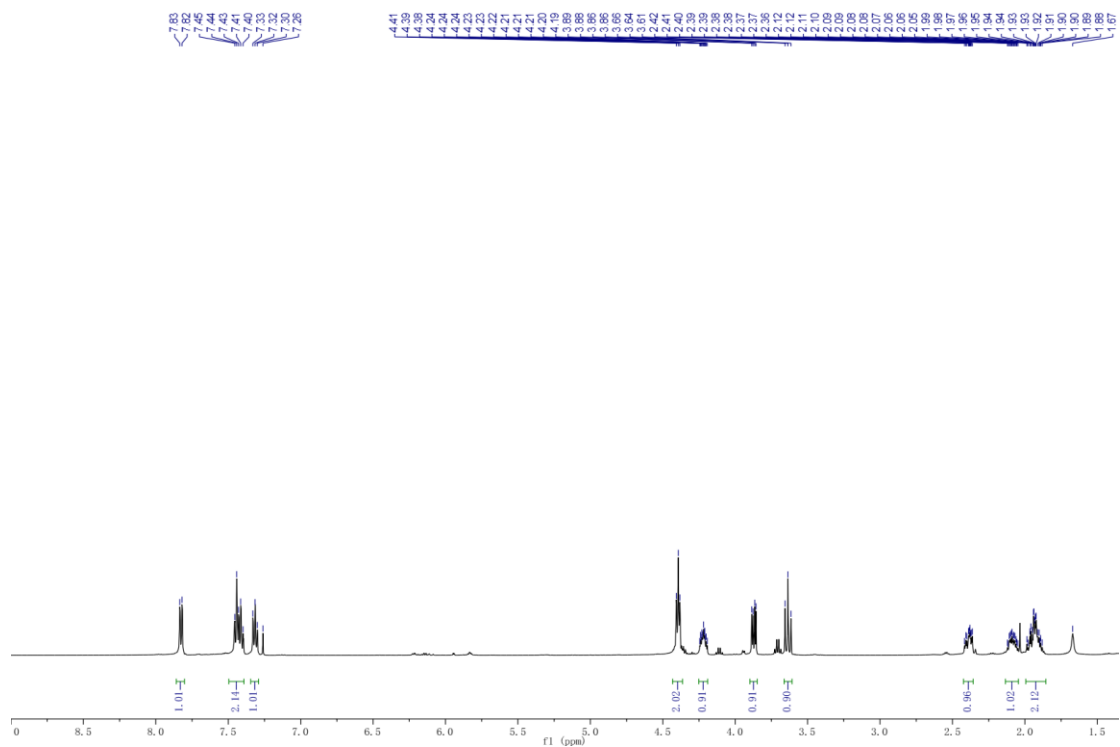

$^1\text{H}$  NMR of compound **77** (500 MHz,  $\text{CDCl}_3$ )

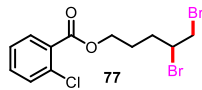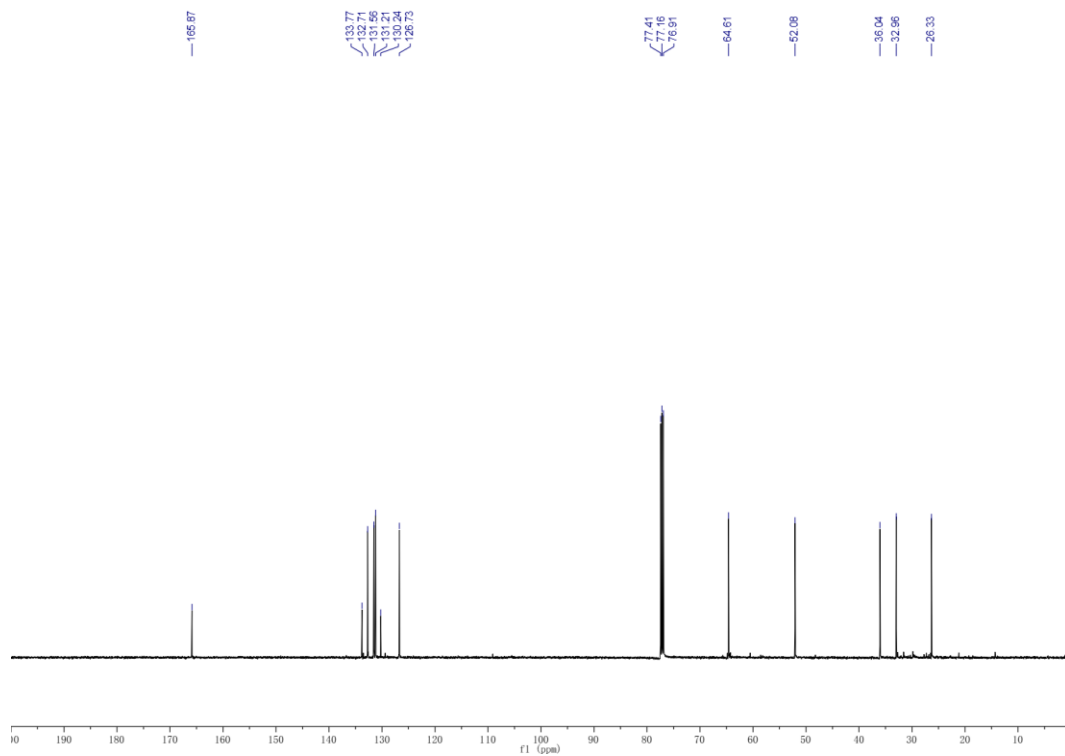

$^{13}\text{C}$  NMR of compound **77** (126 MHz,  $\text{CDCl}_3$ )

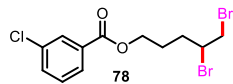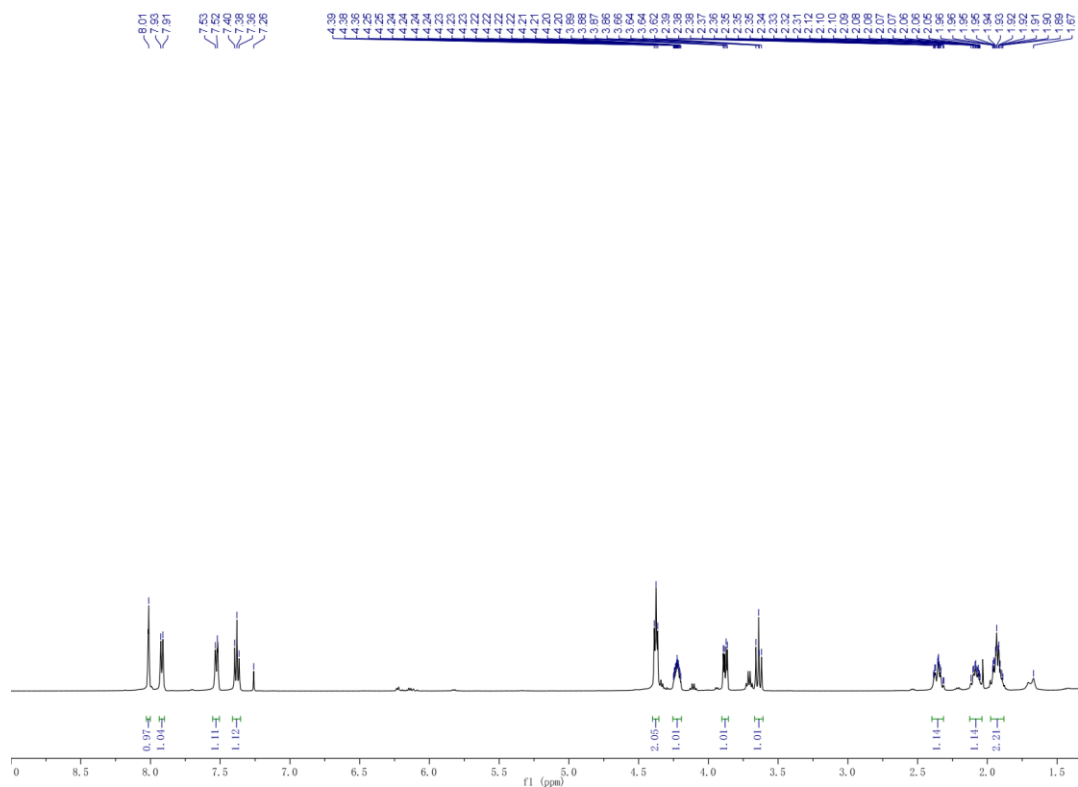

$^1\text{H}$  NMR of compound **78** (500 MHz,  $\text{CDCl}_3$ )

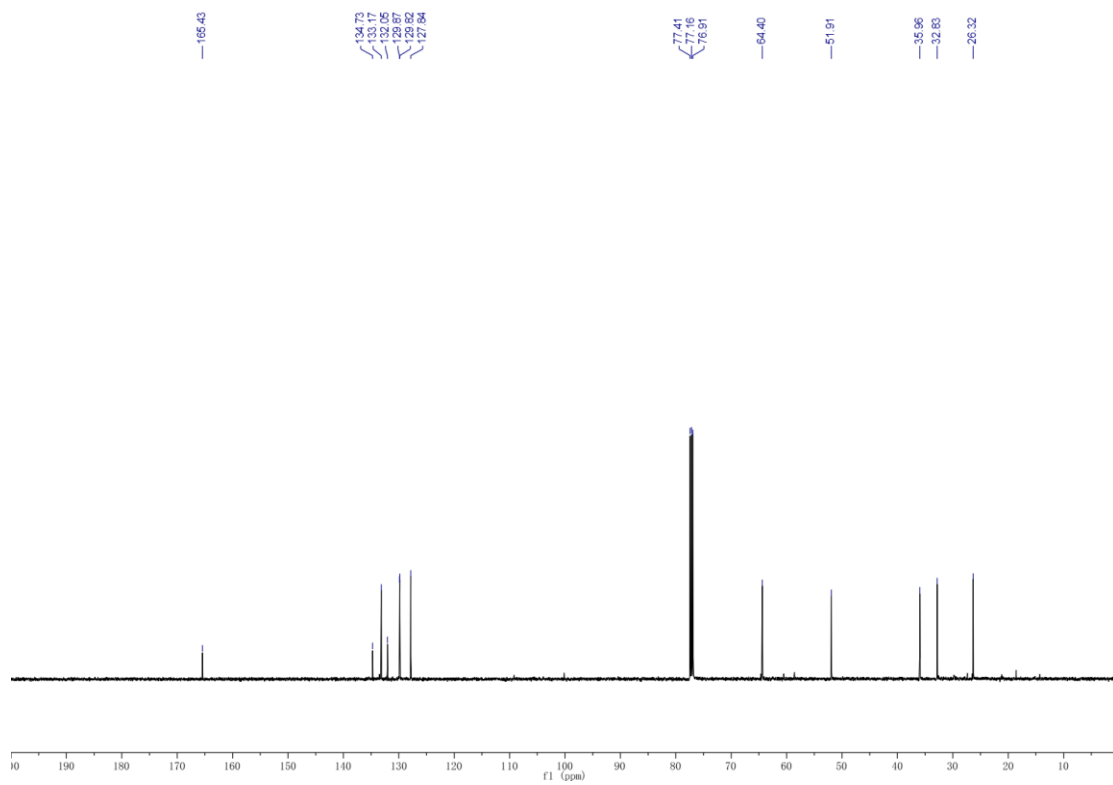

$^{13}\text{C}$  NMR of compound **78** (126 MHz,  $\text{CDCl}_3$ )

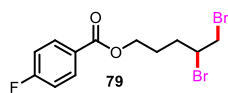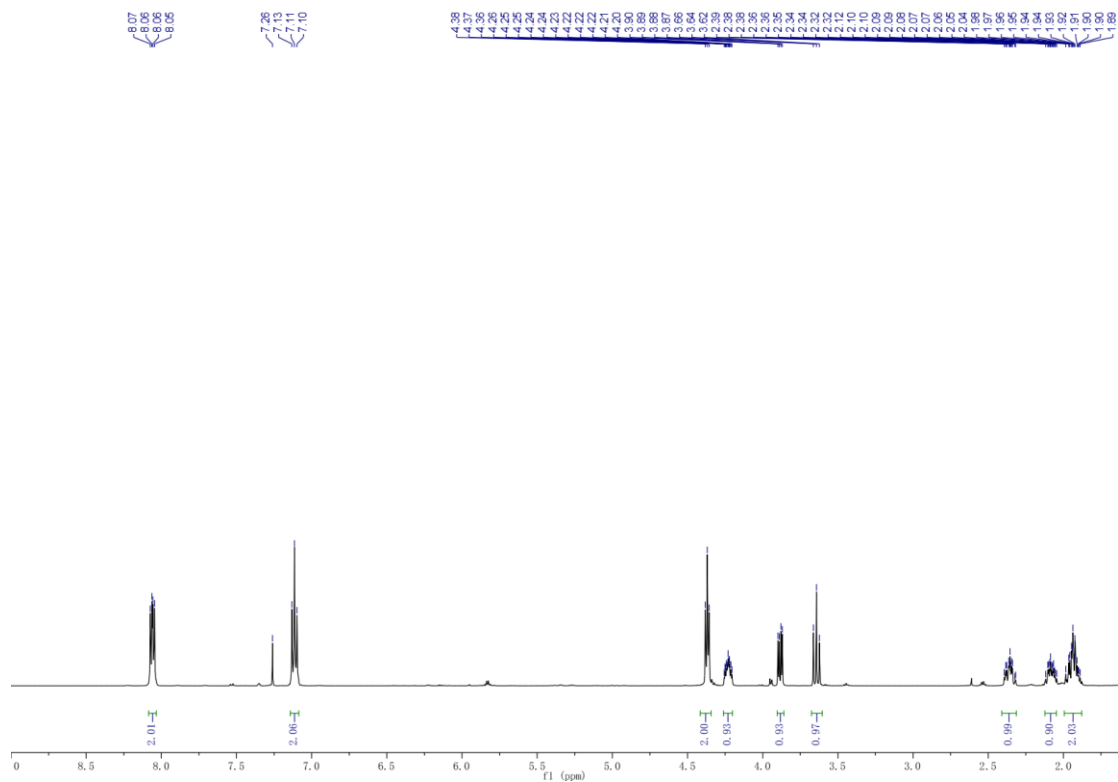

<sup>1</sup>H NMR of compound **79** (500 MHz, CDCl<sub>3</sub>)

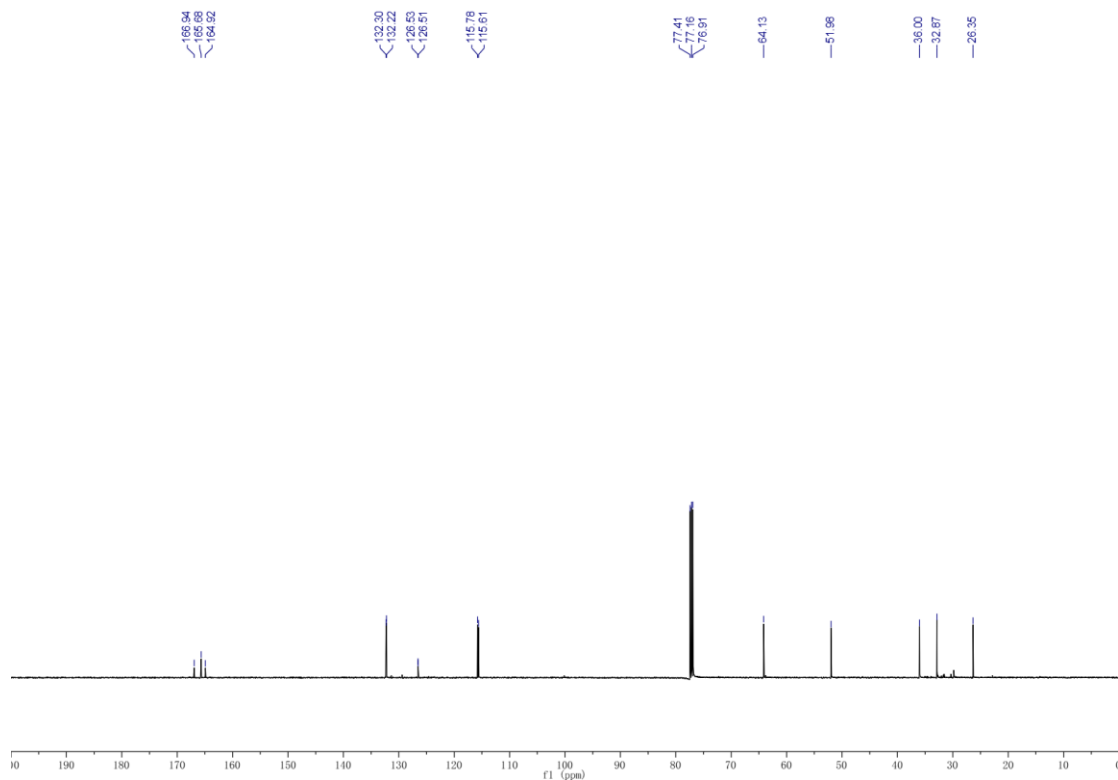

<sup>13</sup>C NMR of compound **79** (126 MHz, CDCl<sub>3</sub>)



-106.95  
-106.95  
-106.95  
-106.95  
-106.95  
-106.95

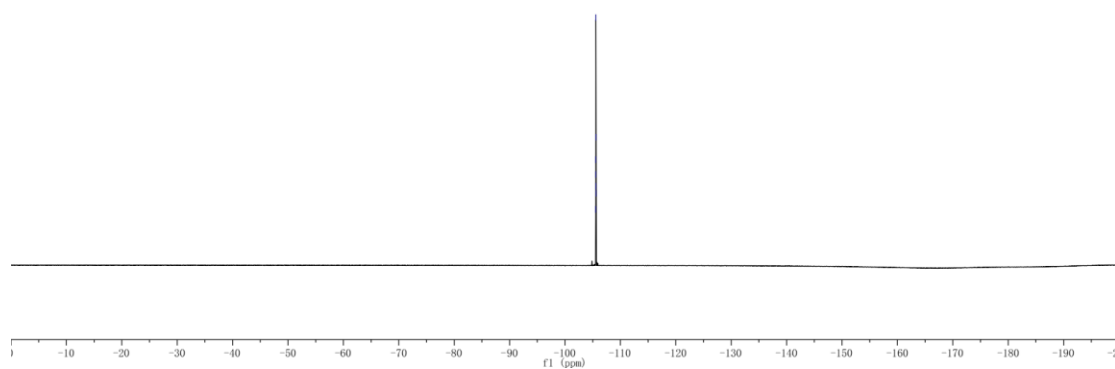

$^{19}\text{F}$  NMR of compound 79 (471 MHz,  $\text{CDCl}_3$ )

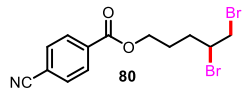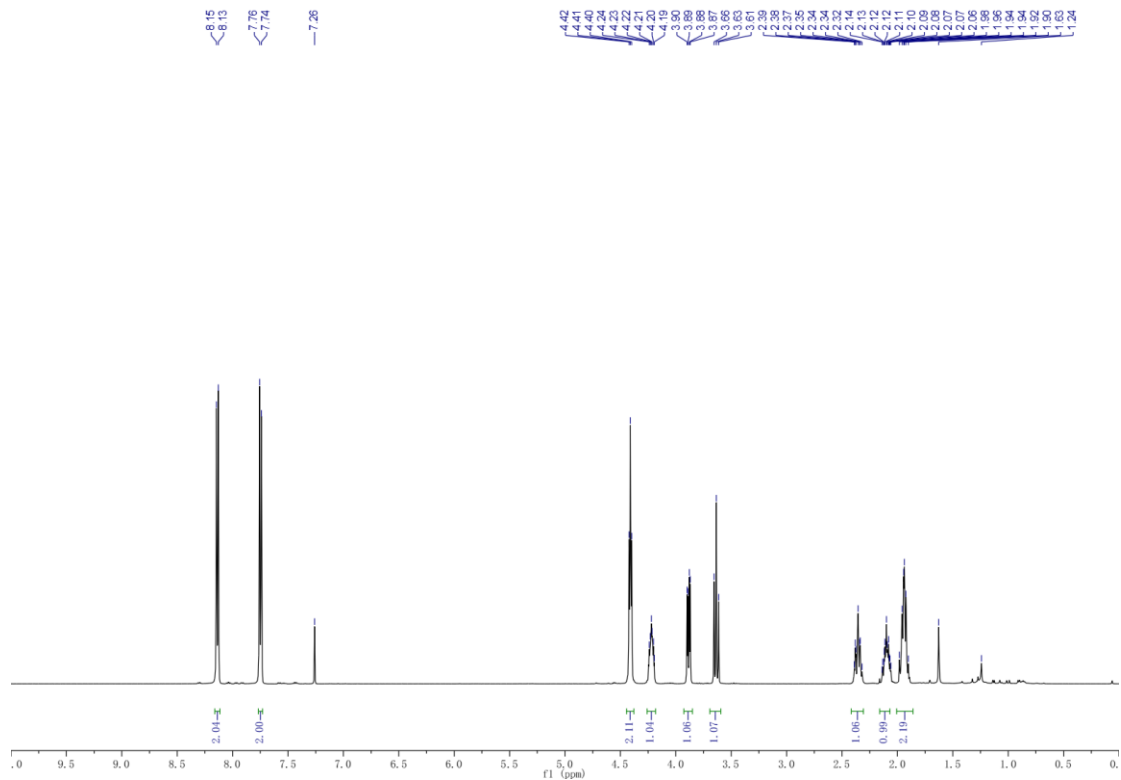

<sup>1</sup>H NMR of compound **80** (500 MHz, CDCl<sub>3</sub>)

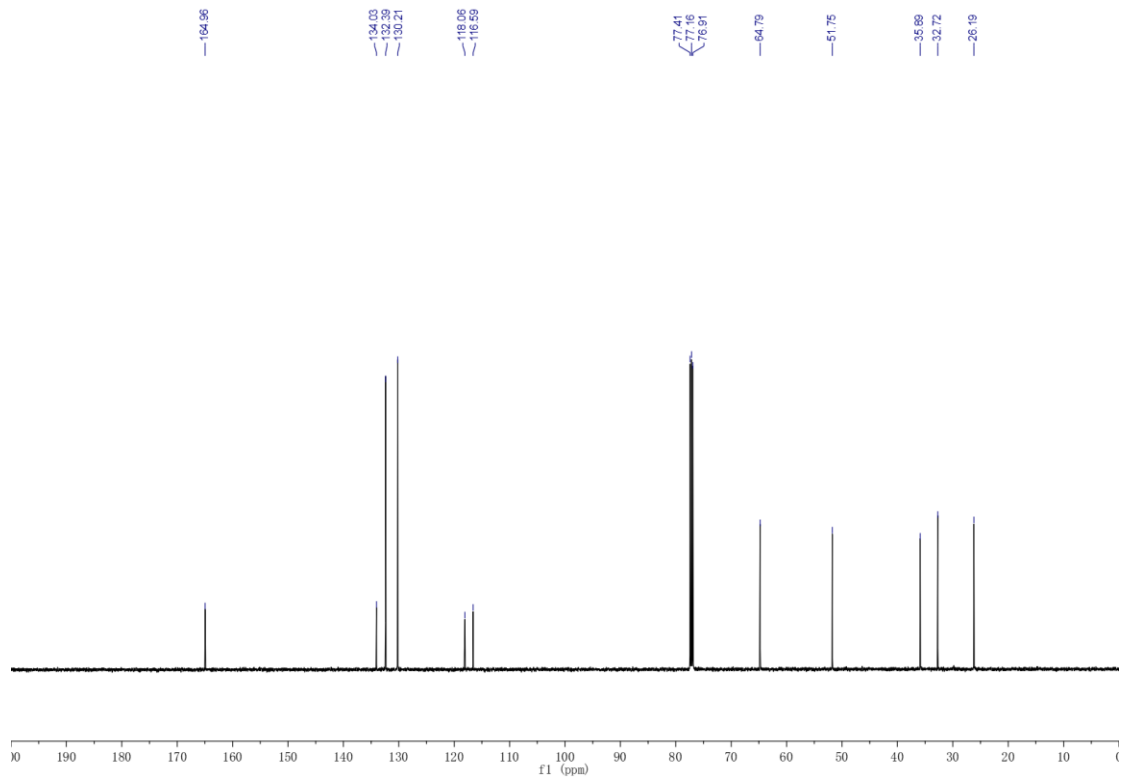

<sup>13</sup>C NMR of compound **80** (126 MHz, CDCl<sub>3</sub>)

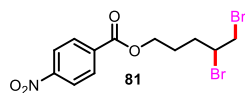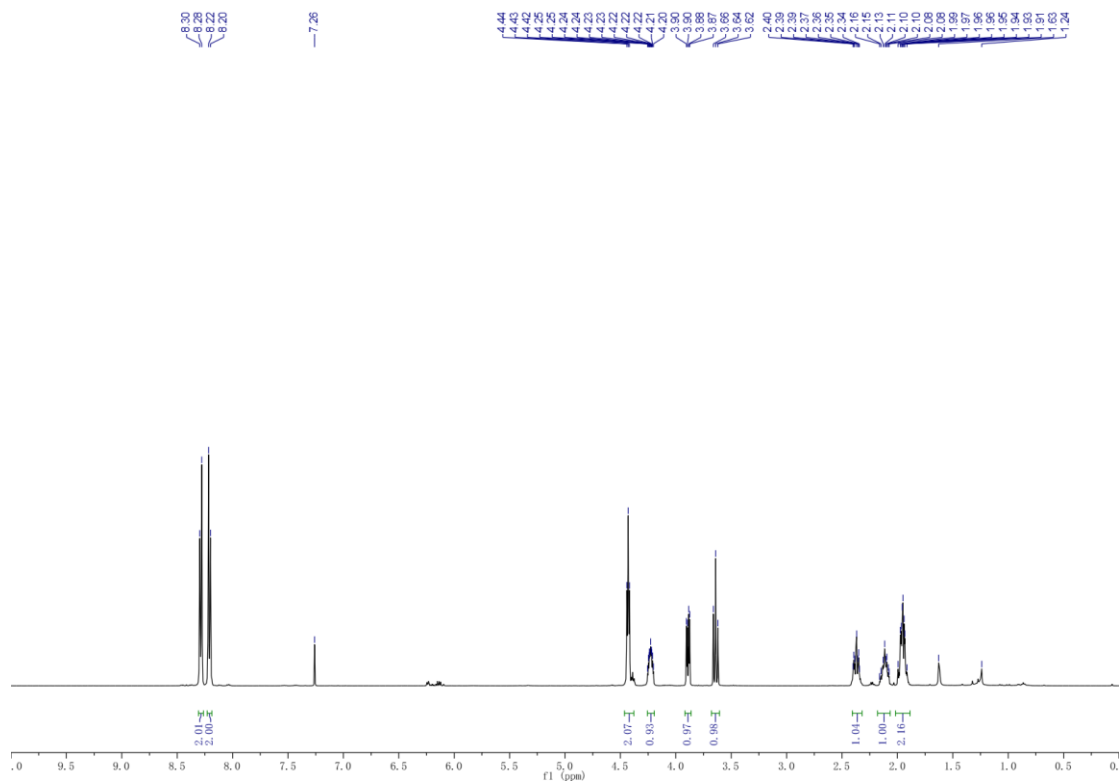

<sup>1</sup>H NMR of compound **81** (500 MHz, CDCl<sub>3</sub>)

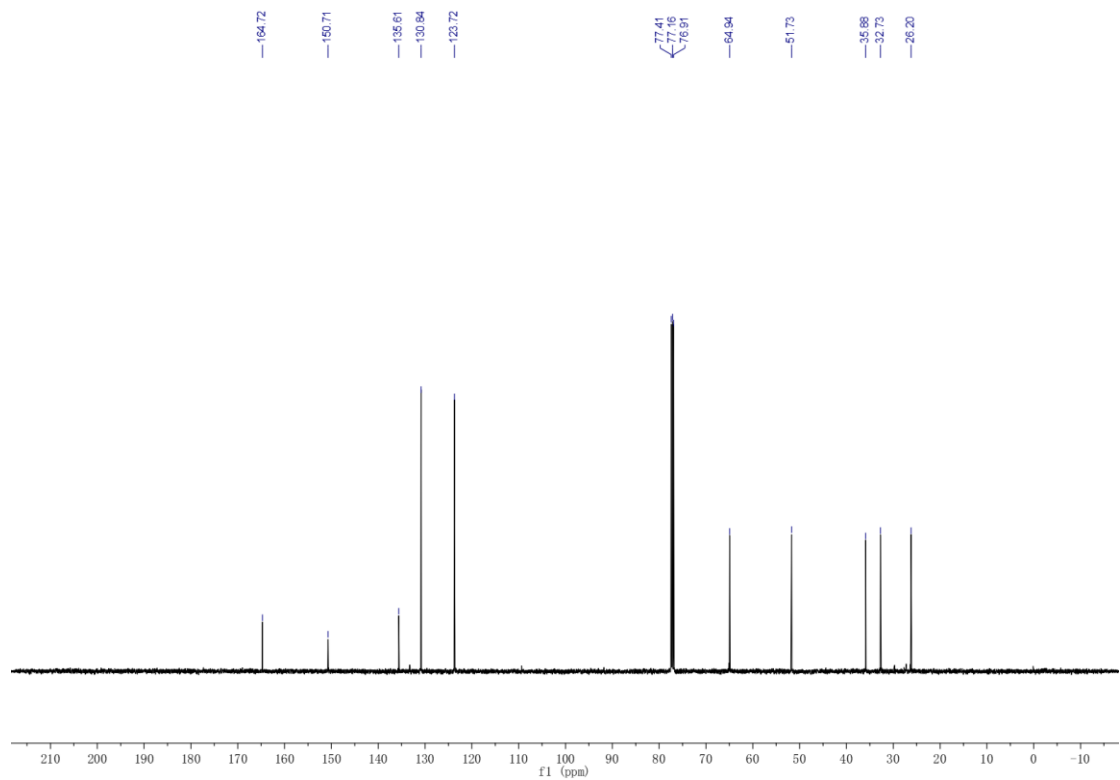

<sup>13</sup>C NMR of compound **81** (126 MHz, CDCl<sub>3</sub>)



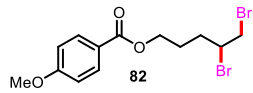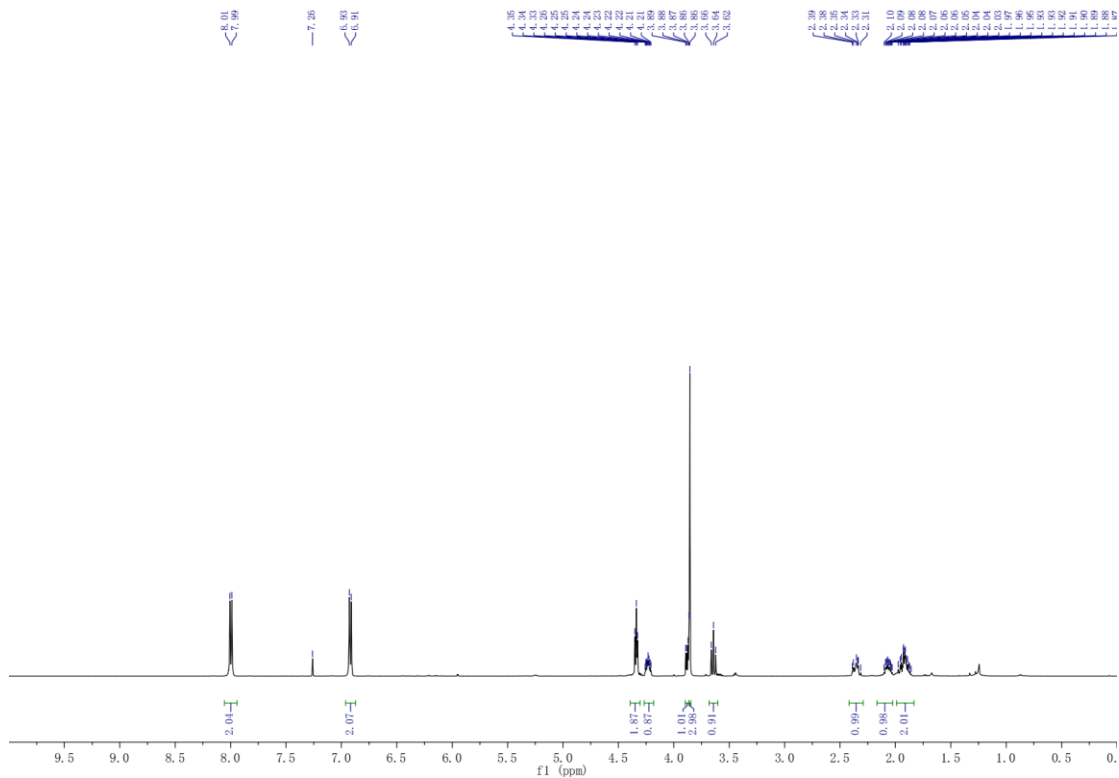

<sup>1</sup>H NMR of compound **82** (500 MHz, CDCl<sub>3</sub>)

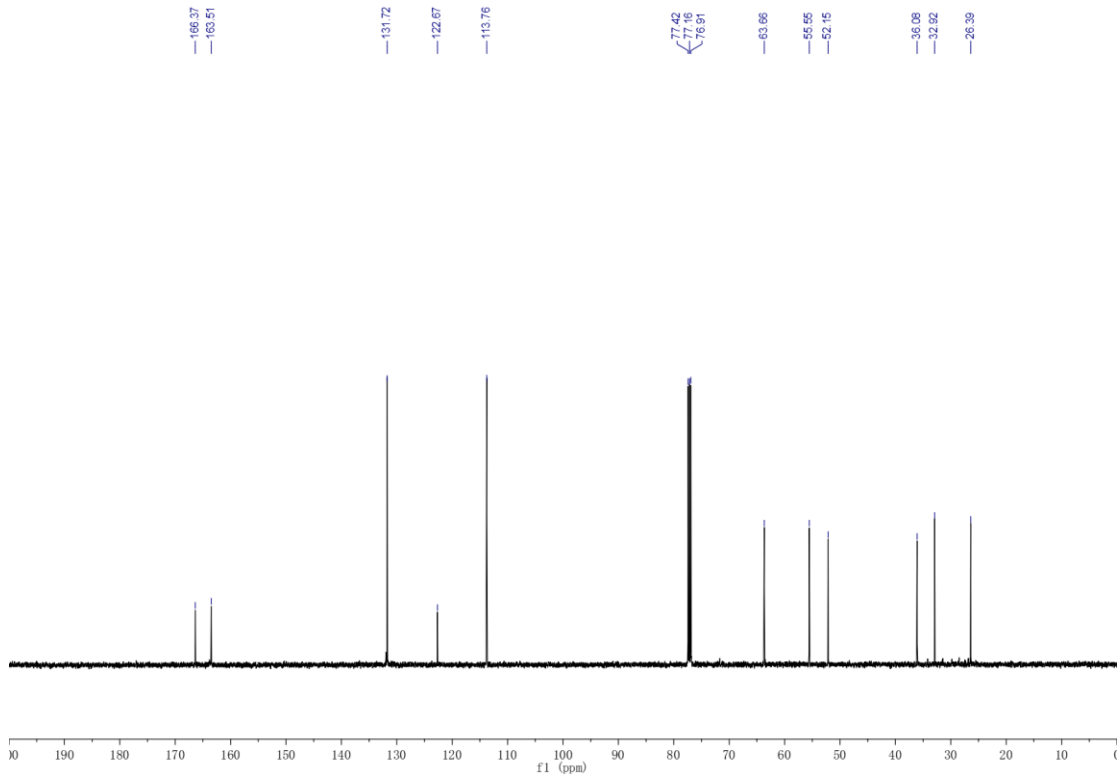

<sup>13</sup>C NMR of compound **82** (126 MHz, CDCl<sub>3</sub>)



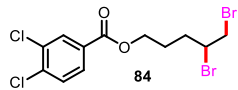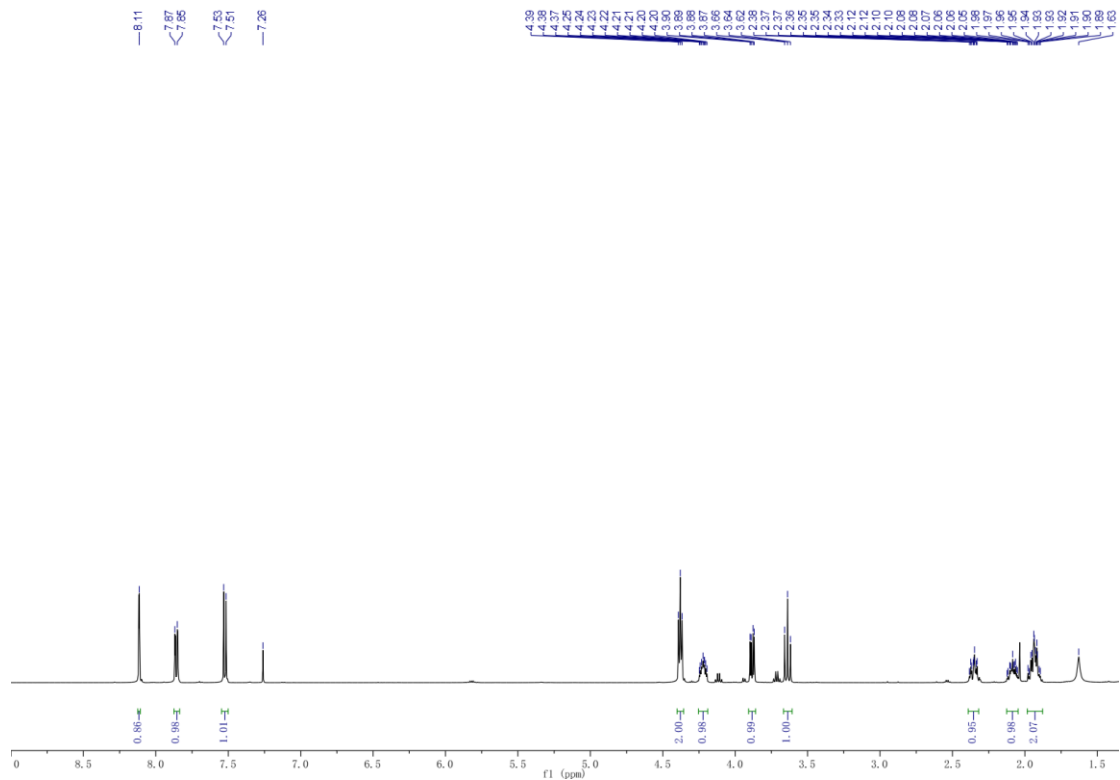

$^1\text{H}$  NMR of compound **84** (500 MHz,  $\text{CDCl}_3$ )

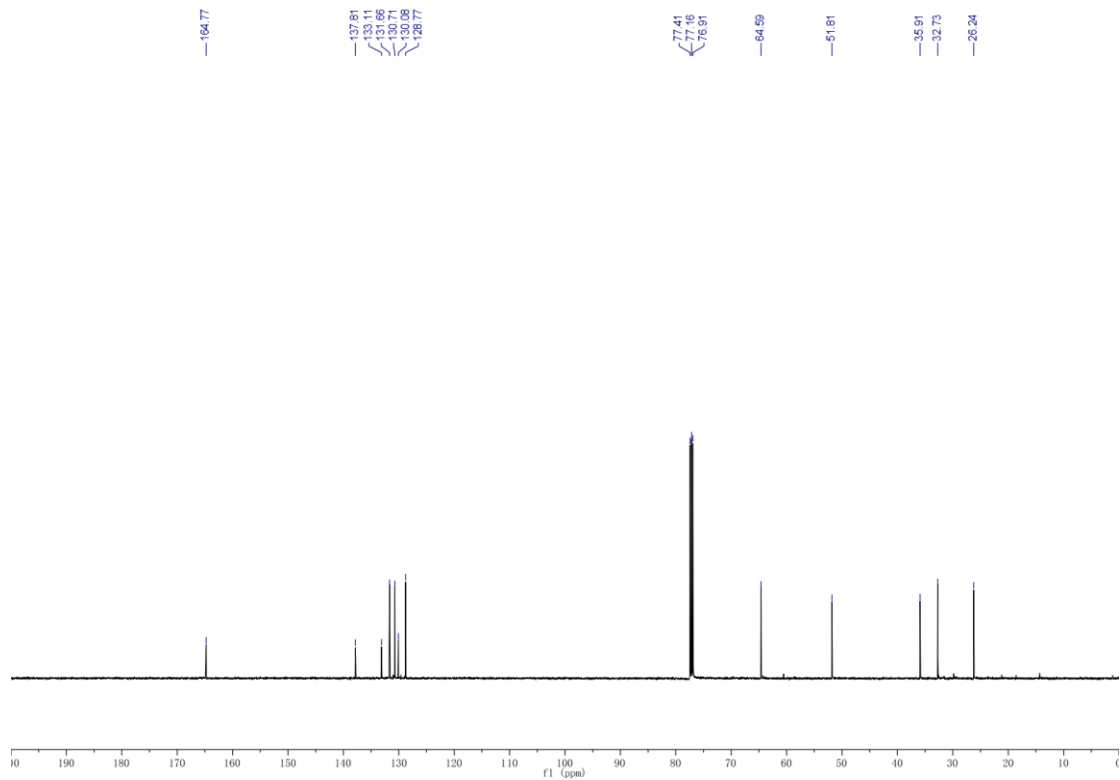

$^{13}\text{C}$  NMR of compound **84** (126 MHz,  $\text{CDCl}_3$ )

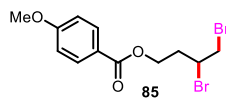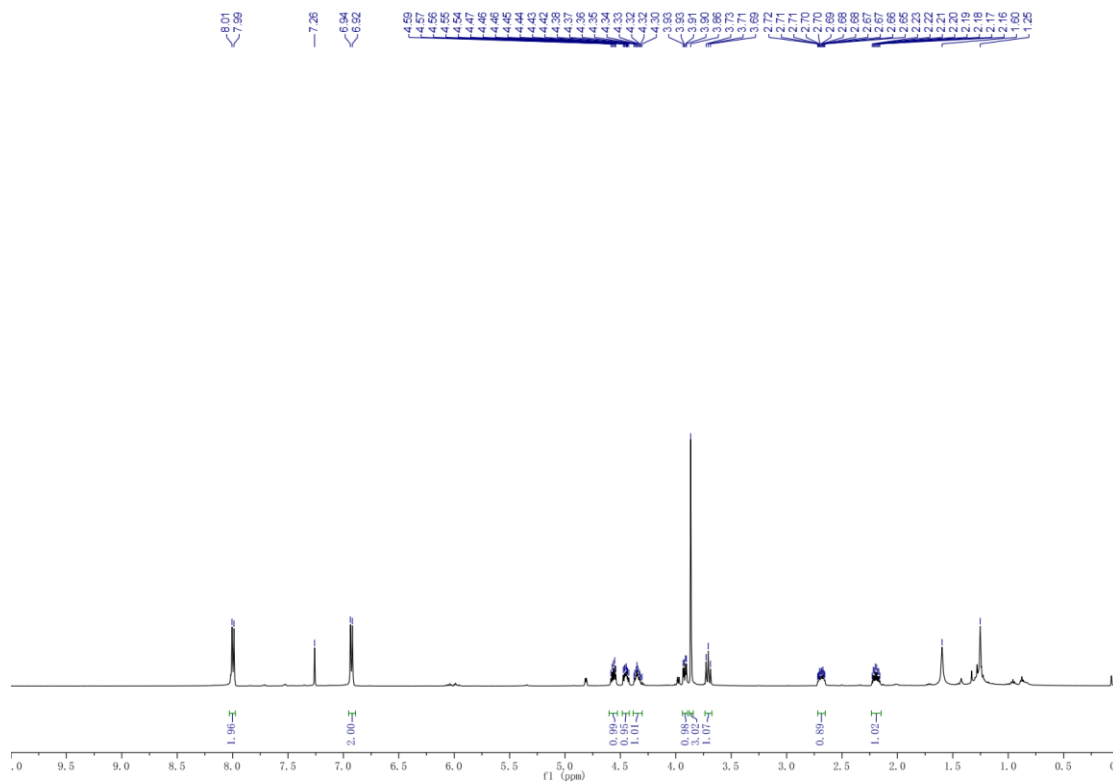

<sup>1</sup>H NMR of compound **85** (500 MHz, CDCl<sub>3</sub>)

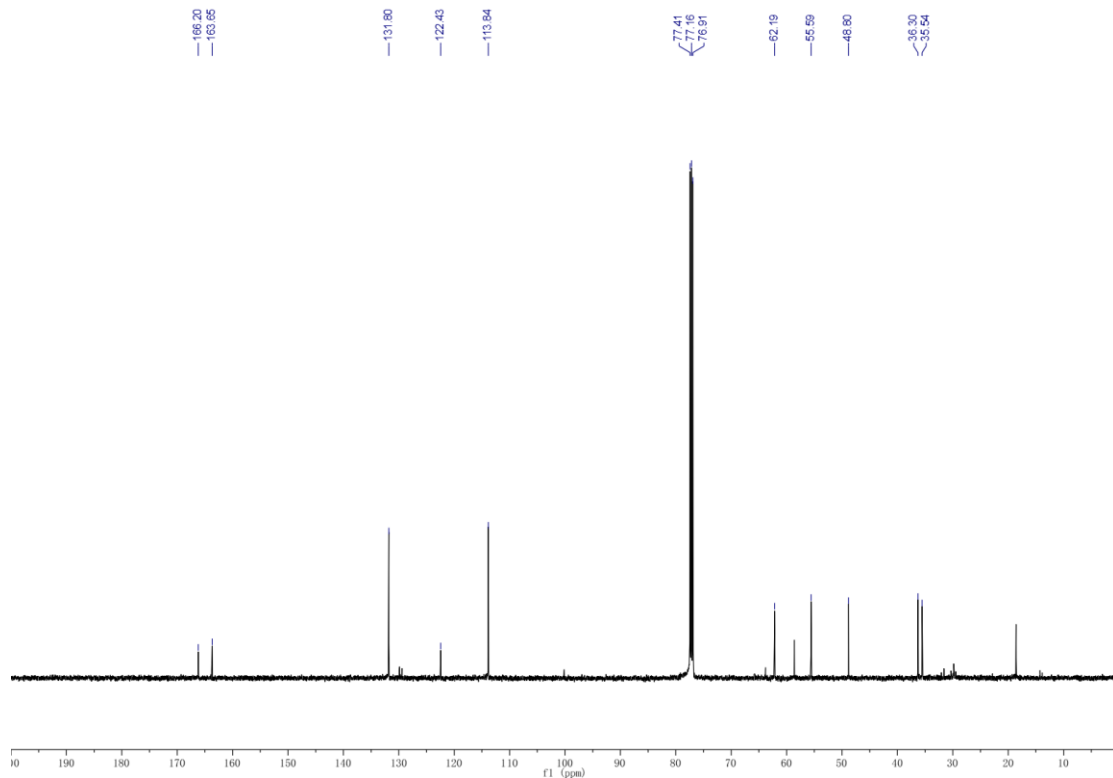

<sup>13</sup>C NMR of compound **85** (126 MHz, CDCl<sub>3</sub>)

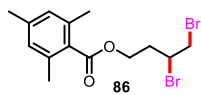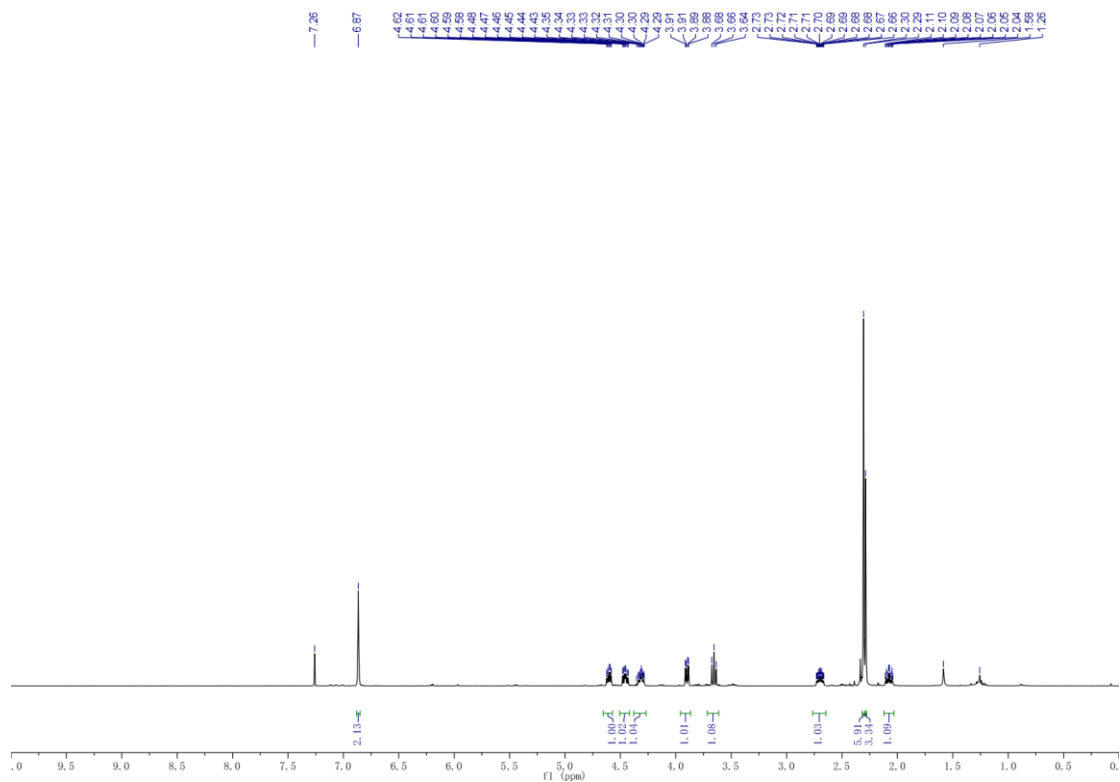

$^1\text{H}$  NMR of compound **86** (500 MHz,  $\text{CDCl}_3$ )

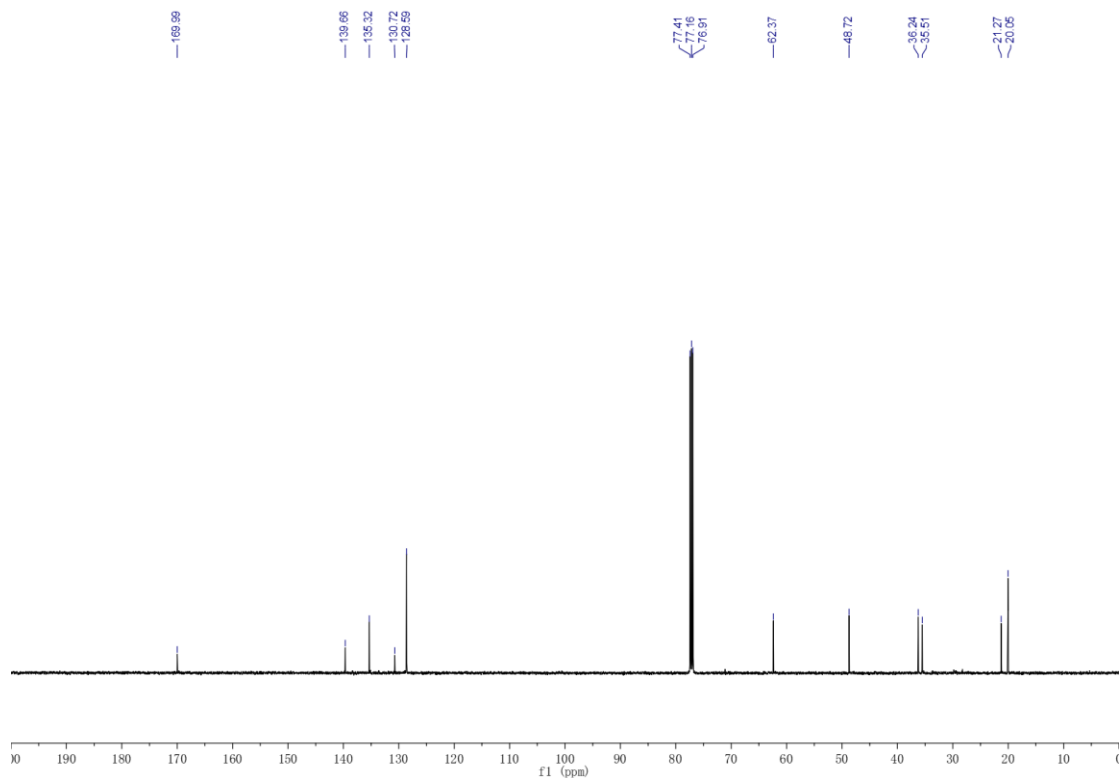

$^{13}\text{C}$  NMR of compound **86** (126 MHz,  $\text{CDCl}_3$ )

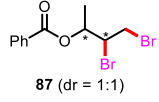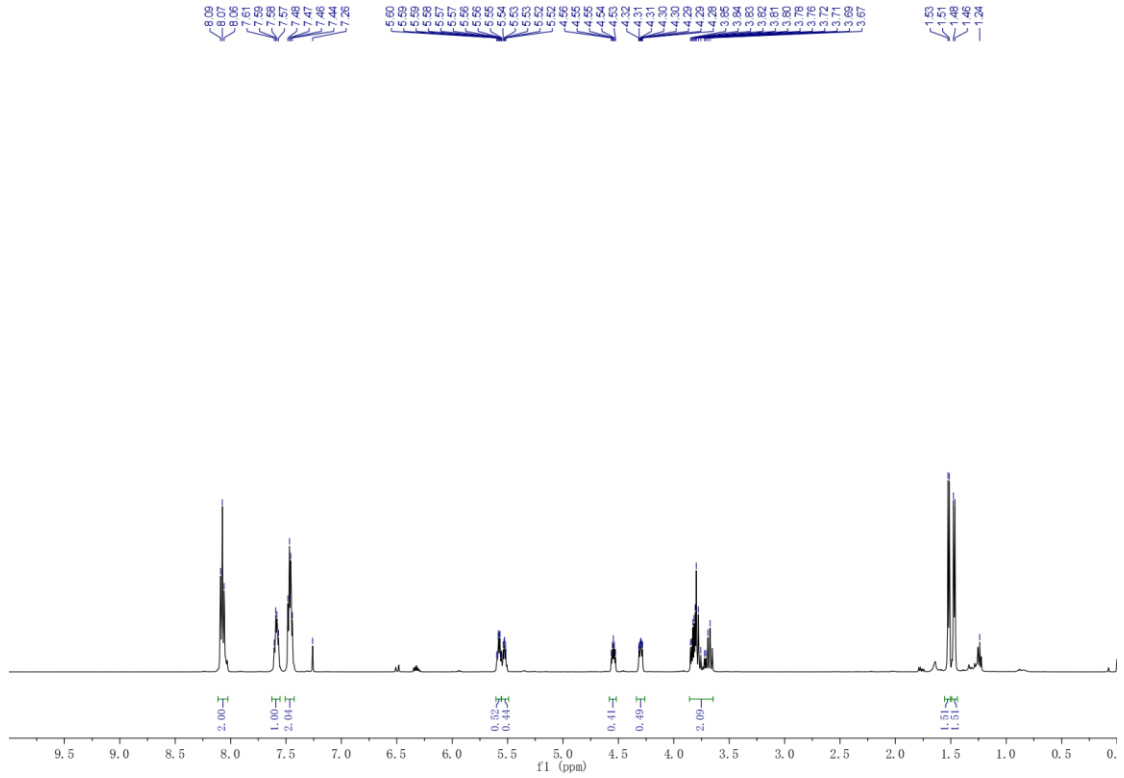

<sup>1</sup>H NMR of compound **87** (500 MHz, CDCl<sub>3</sub>)

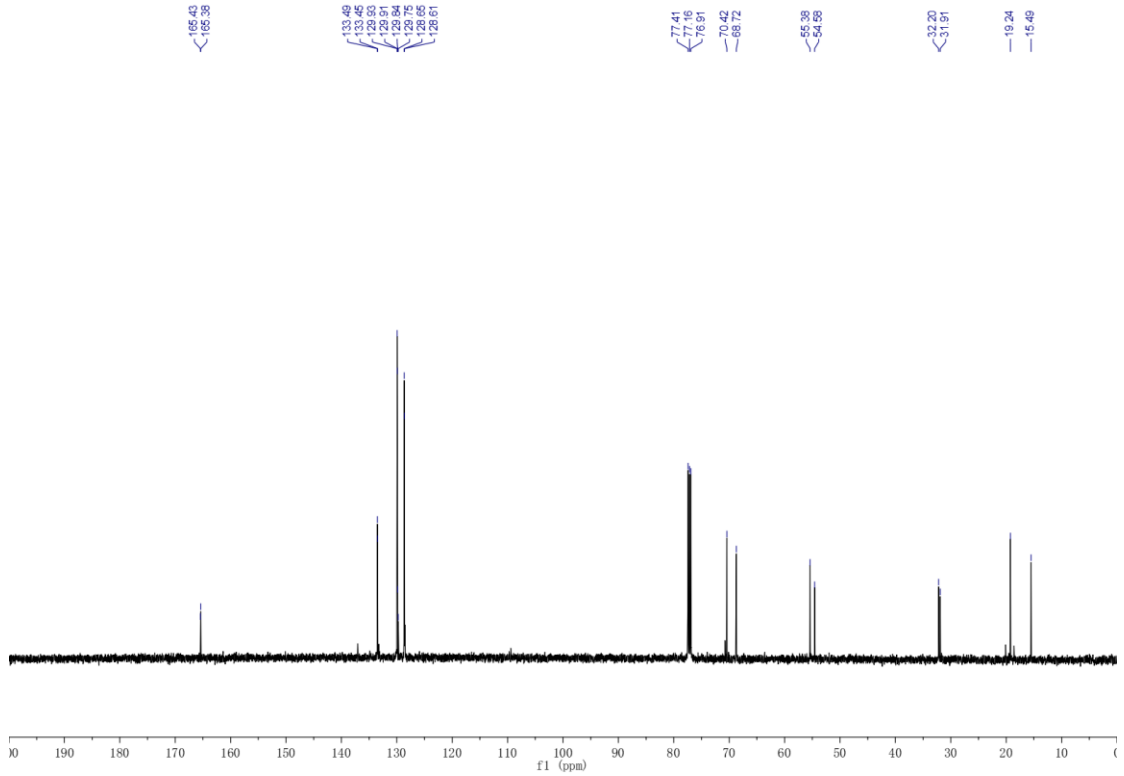

<sup>13</sup>C NMR of compound **87** (126 MHz, CDCl<sub>3</sub>)

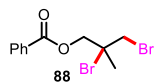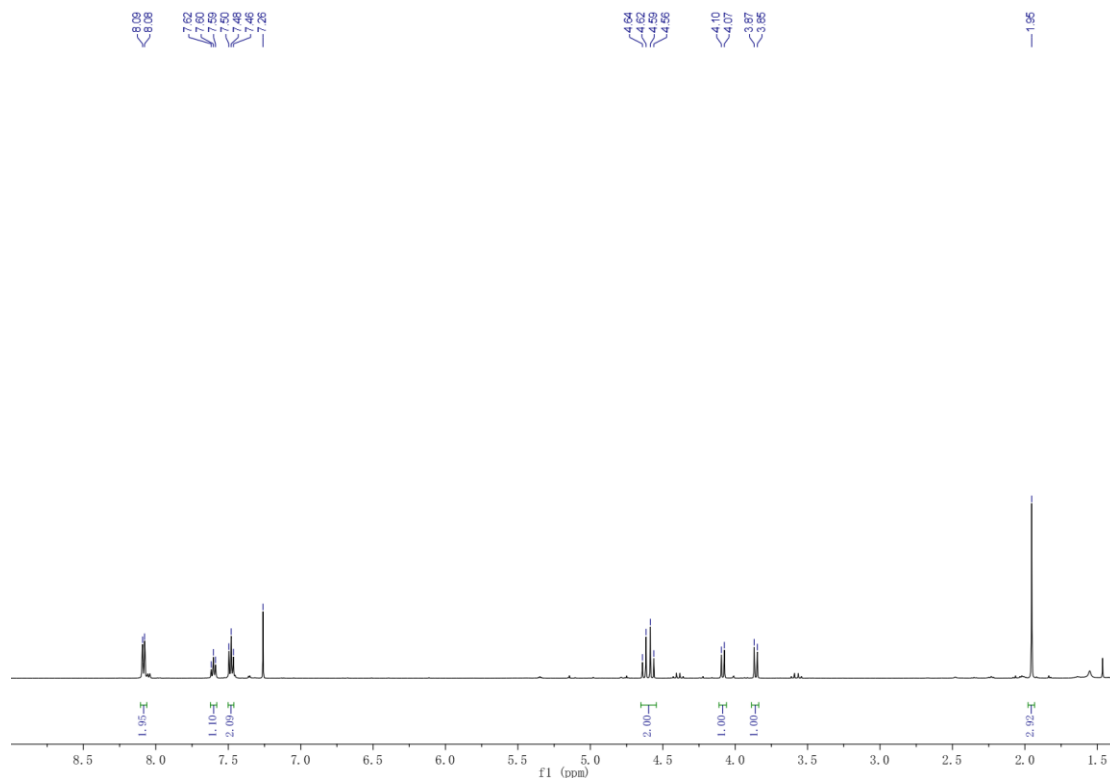

<sup>1</sup>H NMR of compound **88** (500 MHz, CDCl<sub>3</sub>)

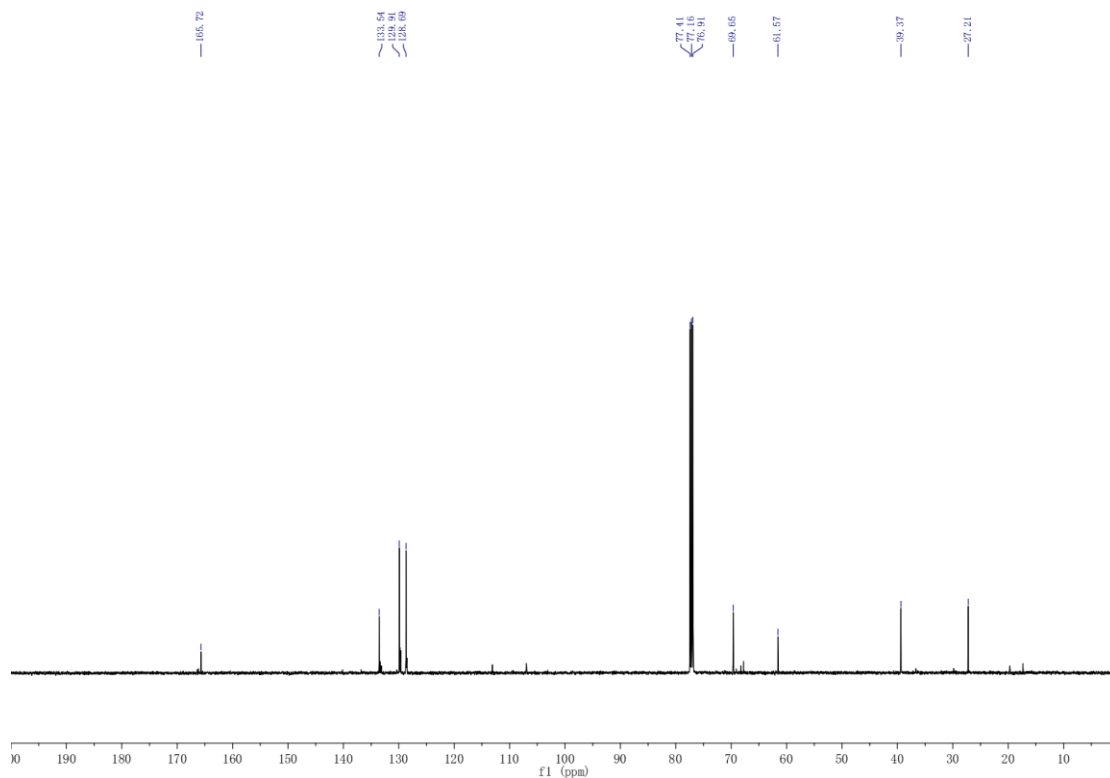

<sup>13</sup>C NMR of compound **88** (126 MHz, CDCl<sub>3</sub>)

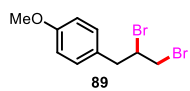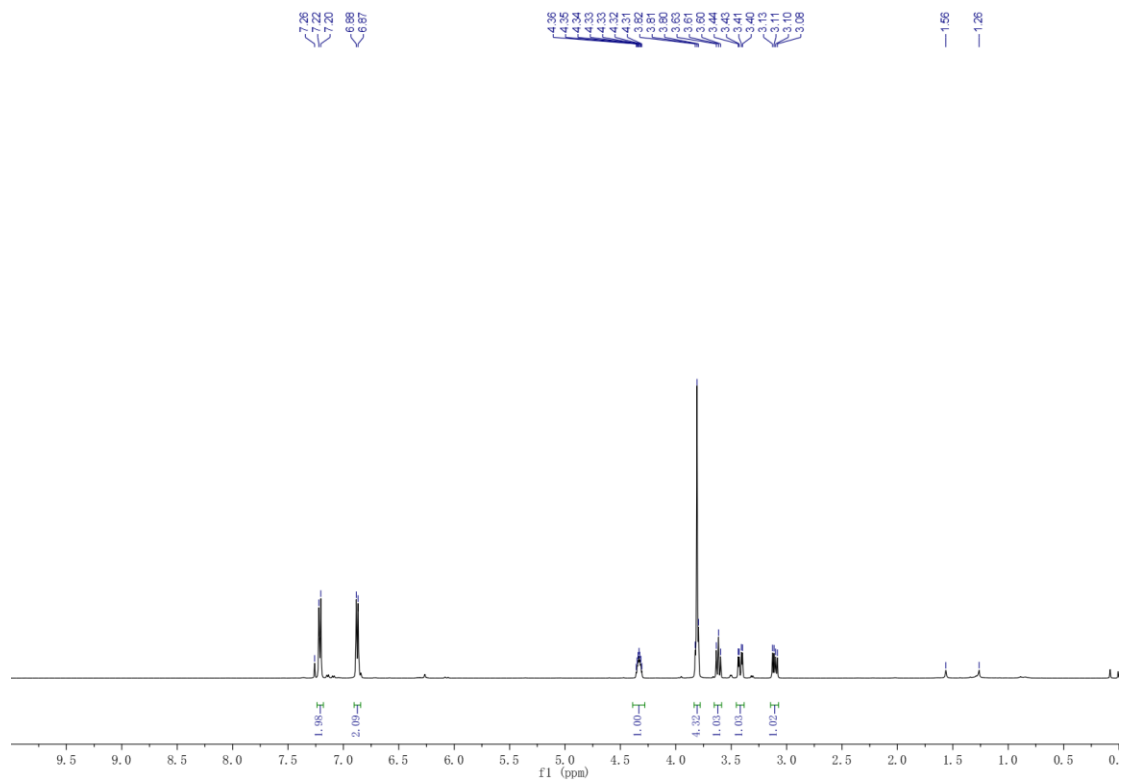

<sup>1</sup>H NMR of compound **89** (500 MHz, CDCl<sub>3</sub>)



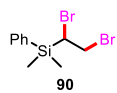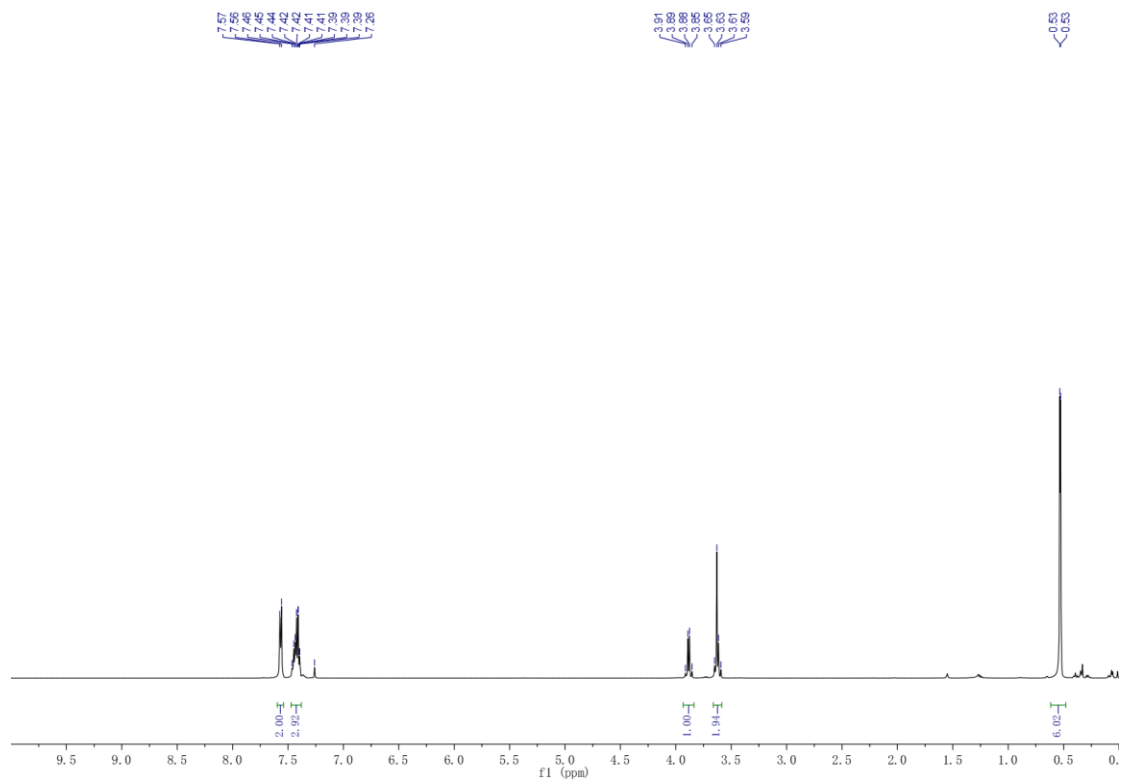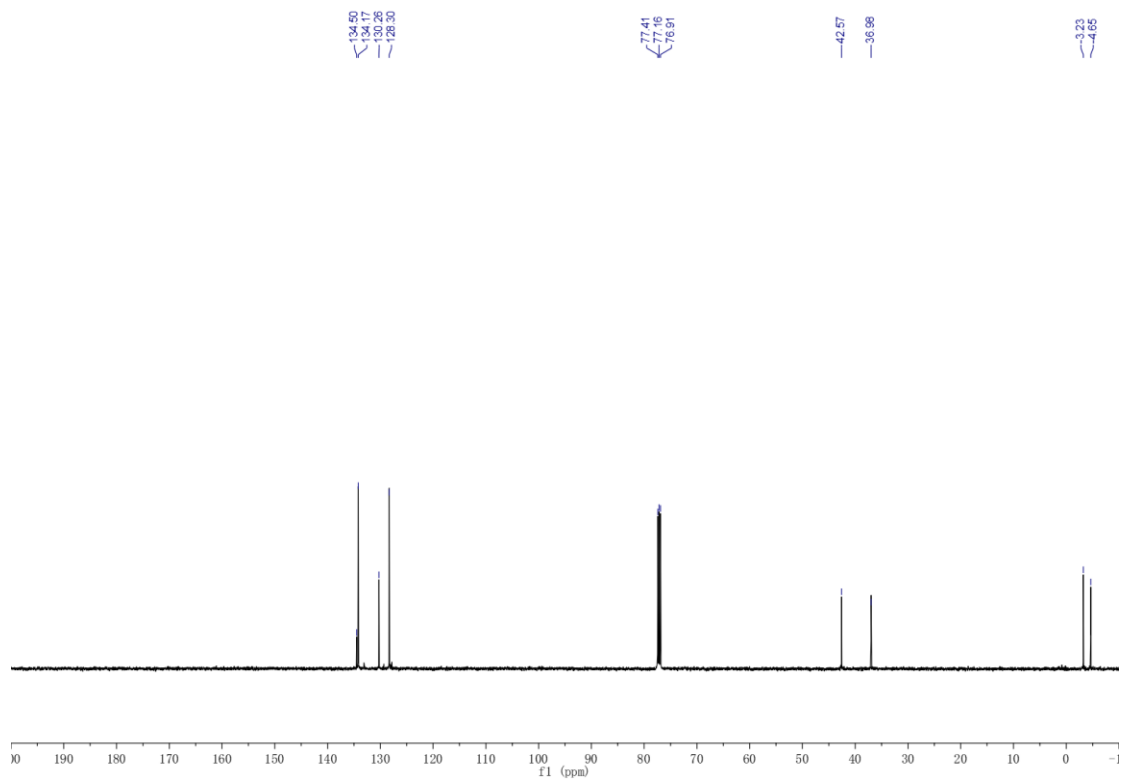

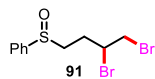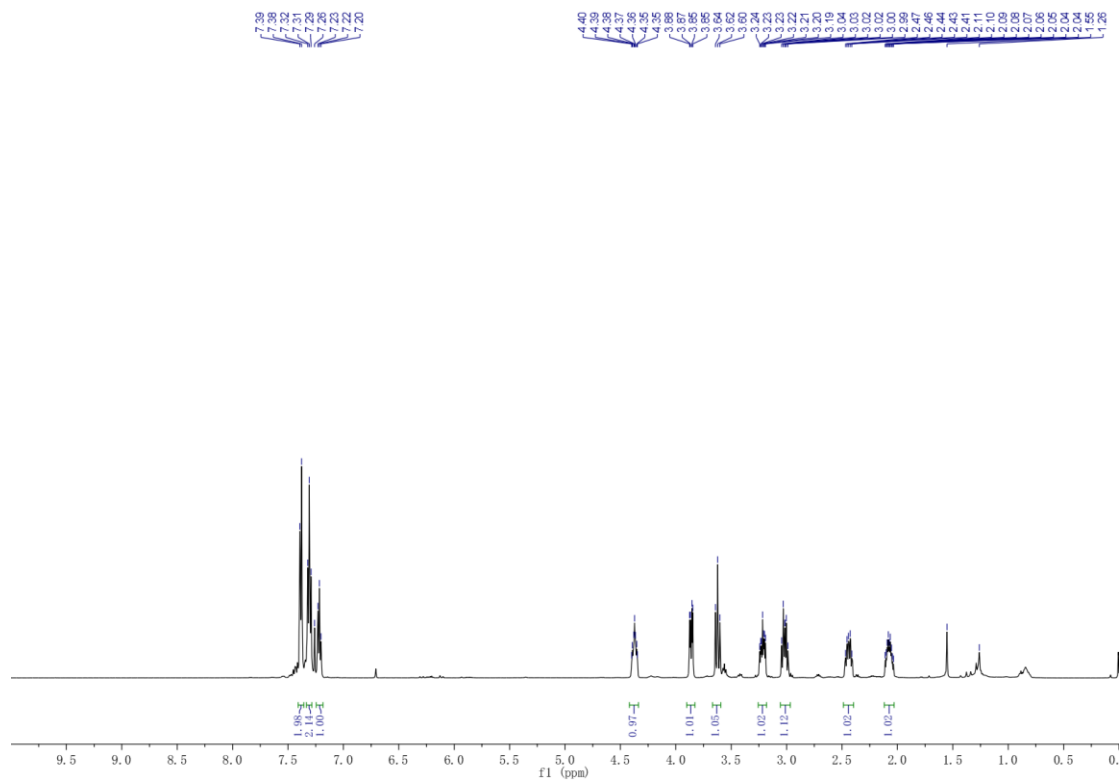

<sup>1</sup>H NMR of compound **91** (500 MHz, CDCl<sub>3</sub>)

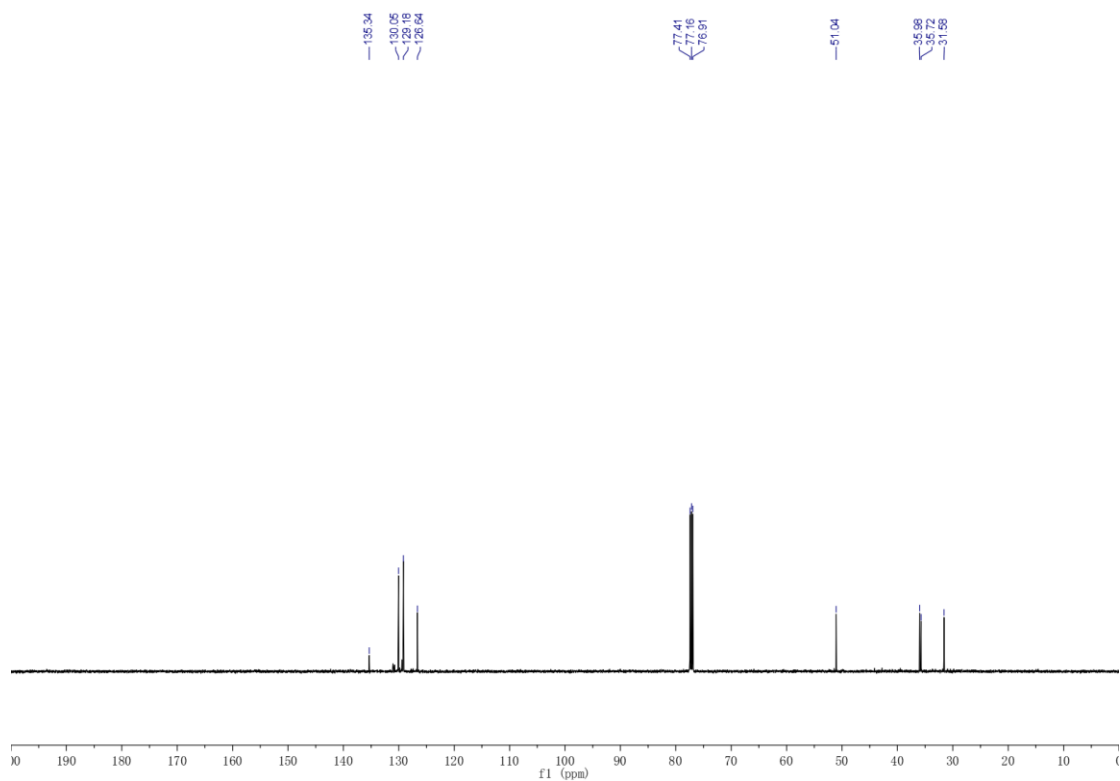

<sup>13</sup>C NMR of compound **91** (126 MHz, CDCl<sub>3</sub>)

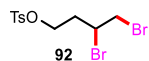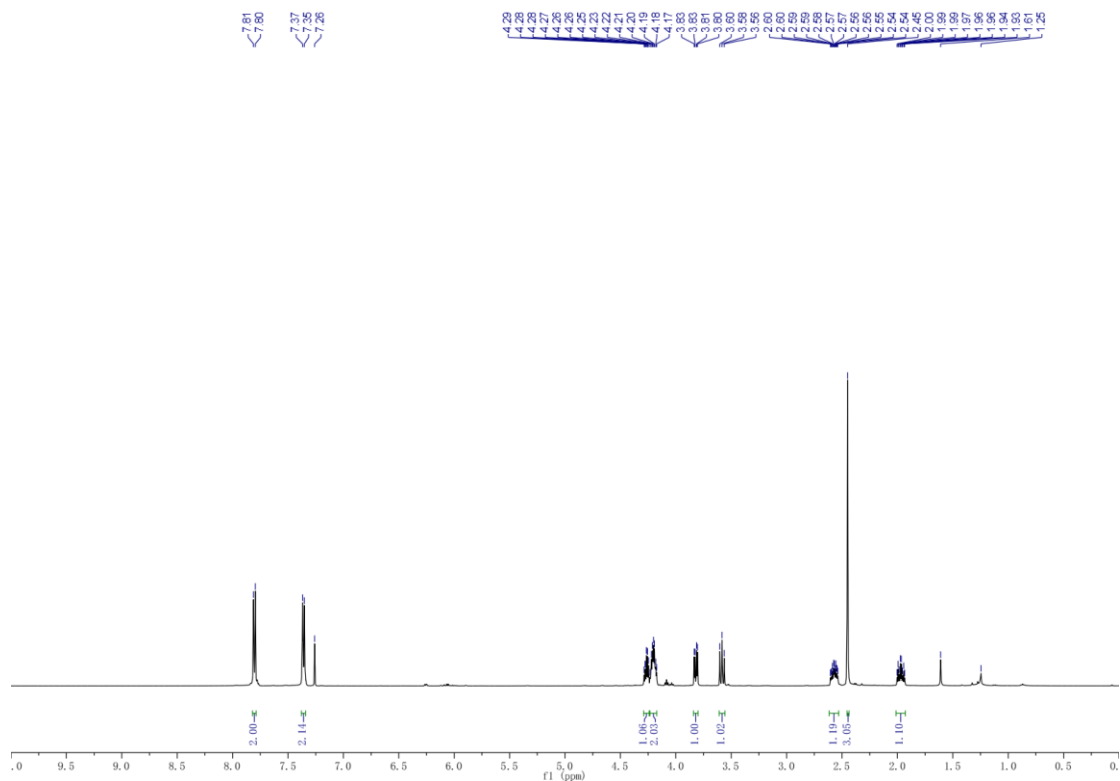

$^1\text{H}$  NMR of compound **92** (500 MHz,  $\text{CDCl}_3$ )

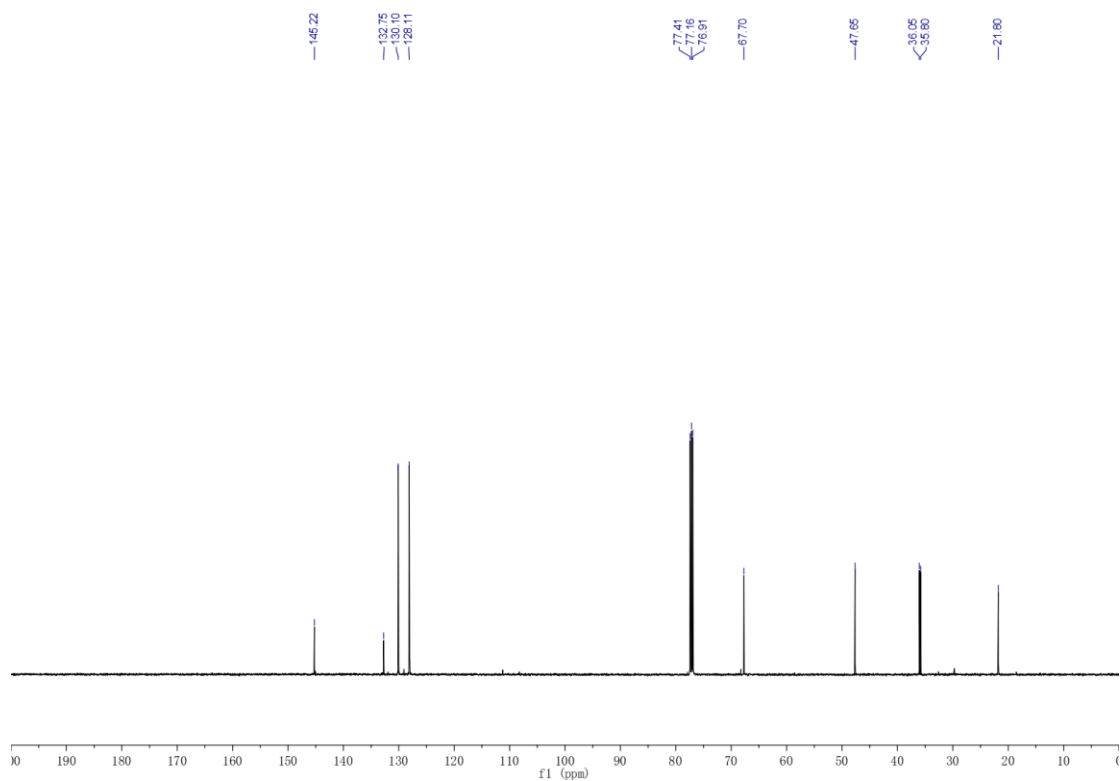

$^{13}\text{C}$  NMR of compound **92** (126 MHz,  $\text{CDCl}_3$ )

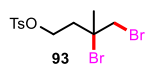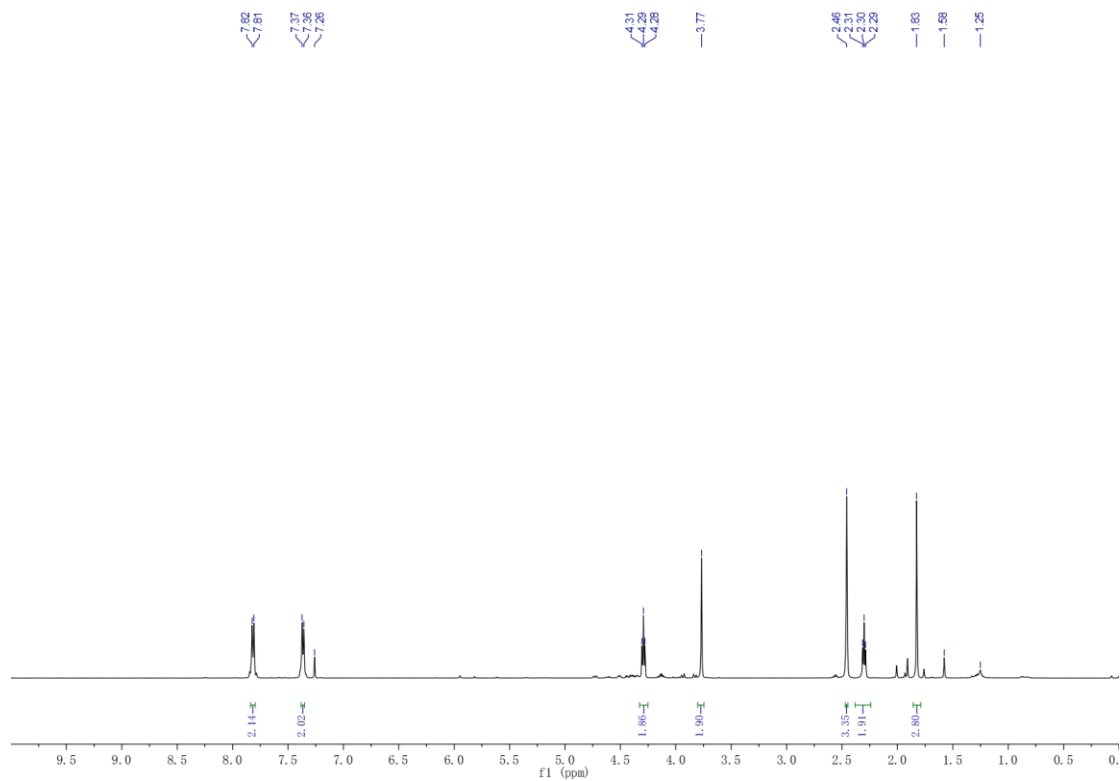

$^1\text{H}$  NMR of compound **93** (500 MHz,  $\text{CDCl}_3$ )

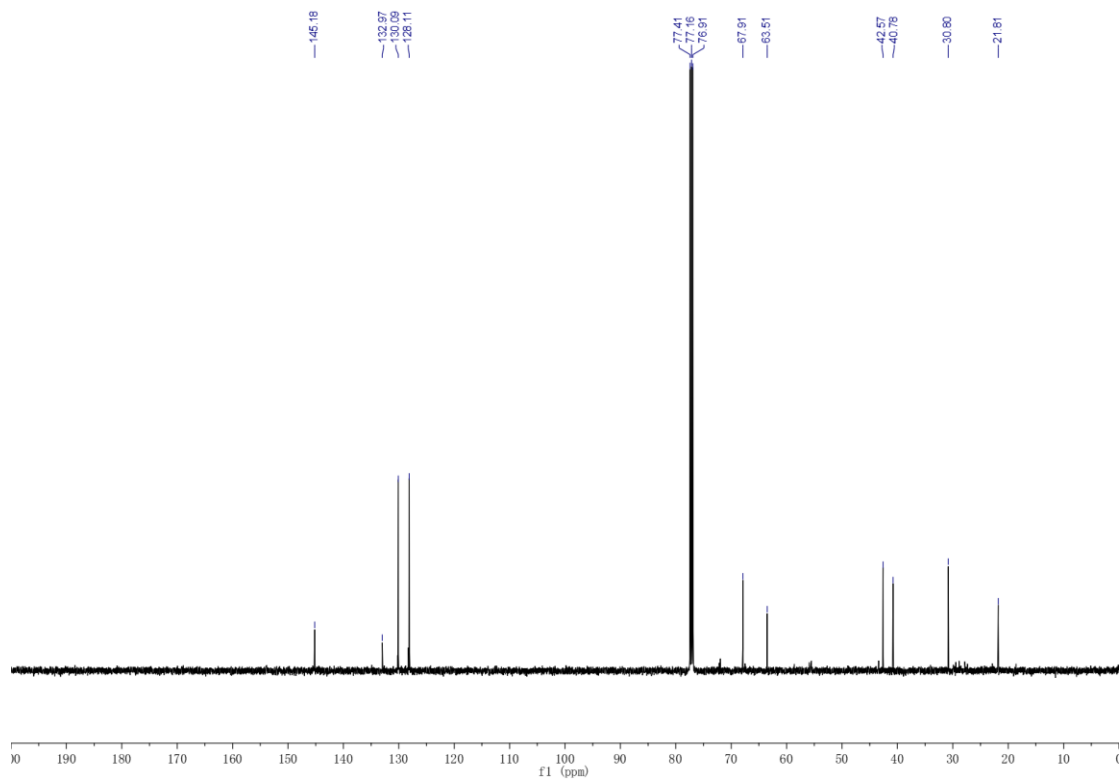

$^{13}\text{C}$  NMR of compound **93** (126 MHz,  $\text{CDCl}_3$ )

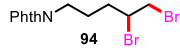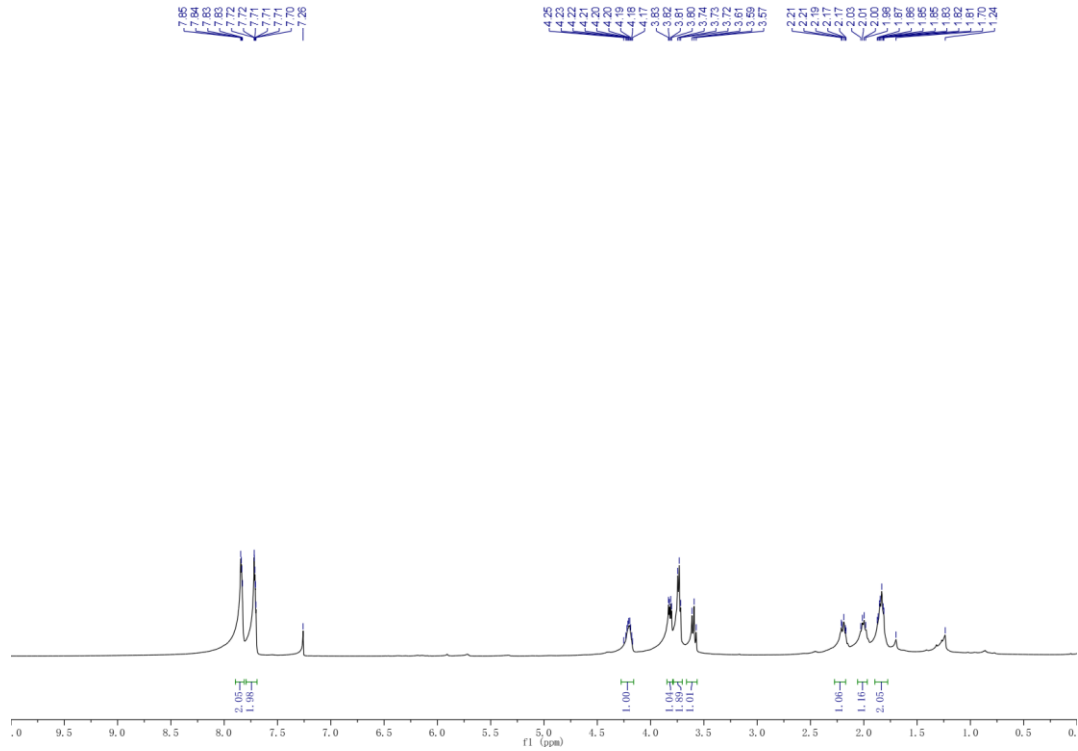

<sup>1</sup>H NMR of compound **94** (500 MHz, CDCl<sub>3</sub>)

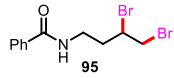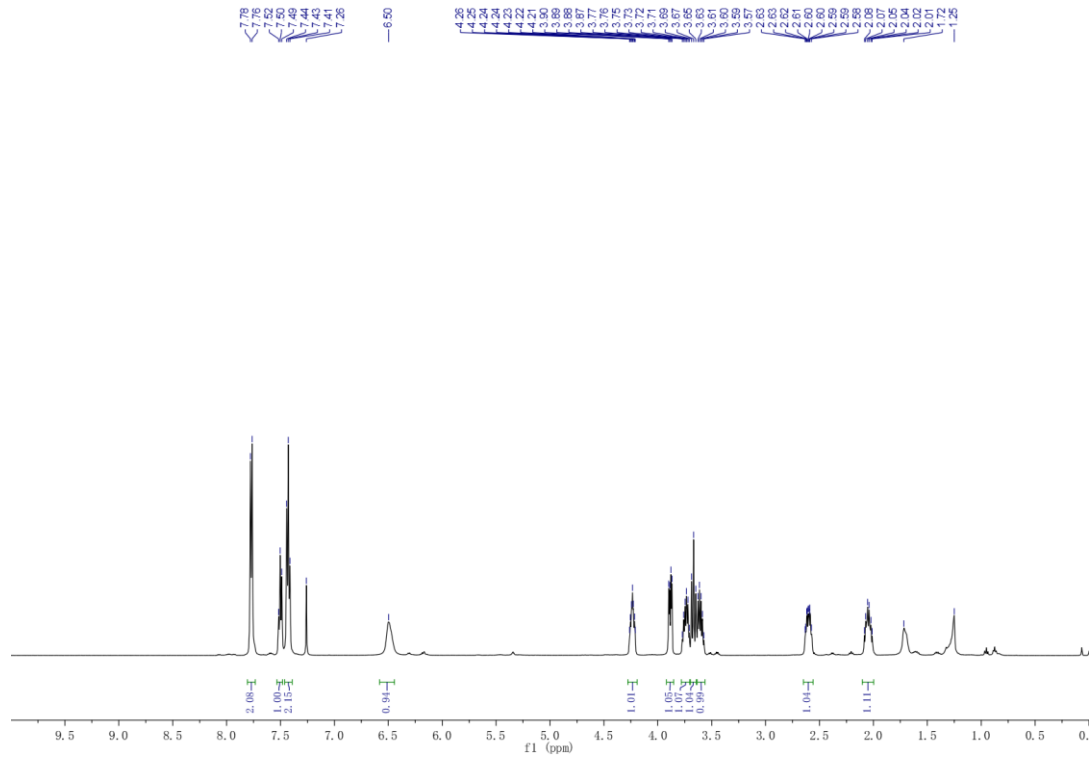

<sup>1</sup>H NMR of compound **95** (500 MHz, CDCl<sub>3</sub>)

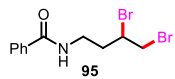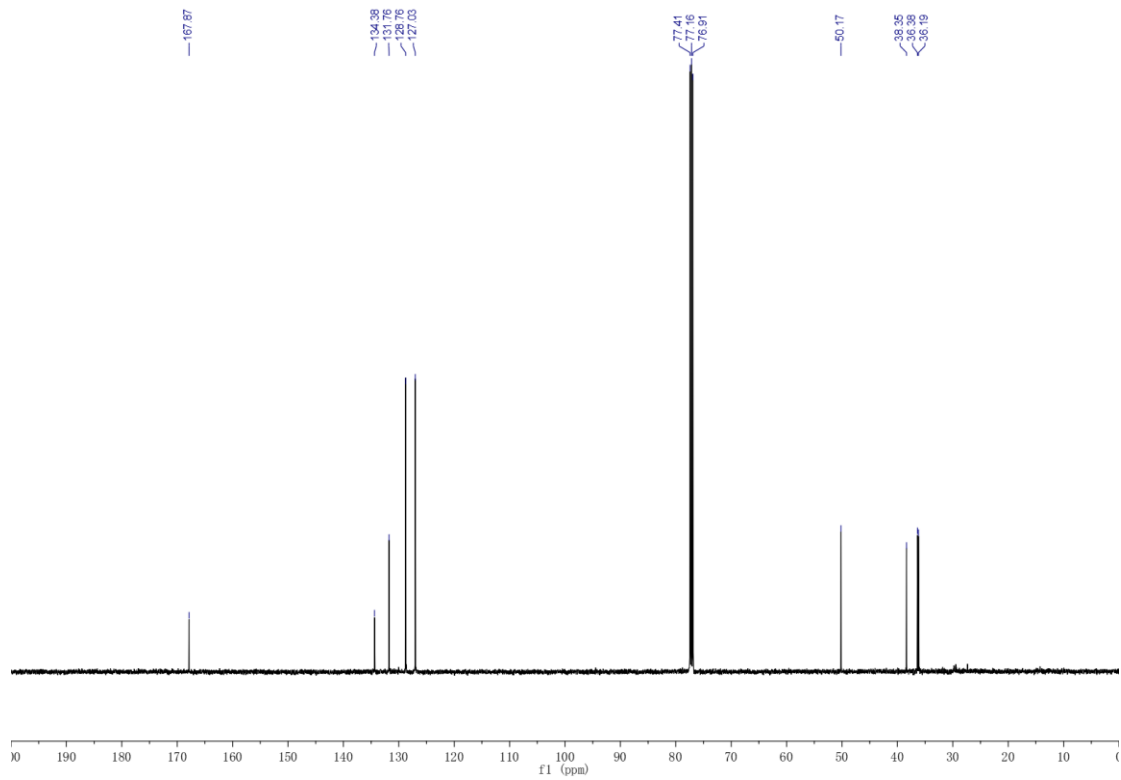

$^{13}\text{C}$  NMR of compound **95** (126 MHz,  $\text{CDCl}_3$ )

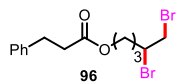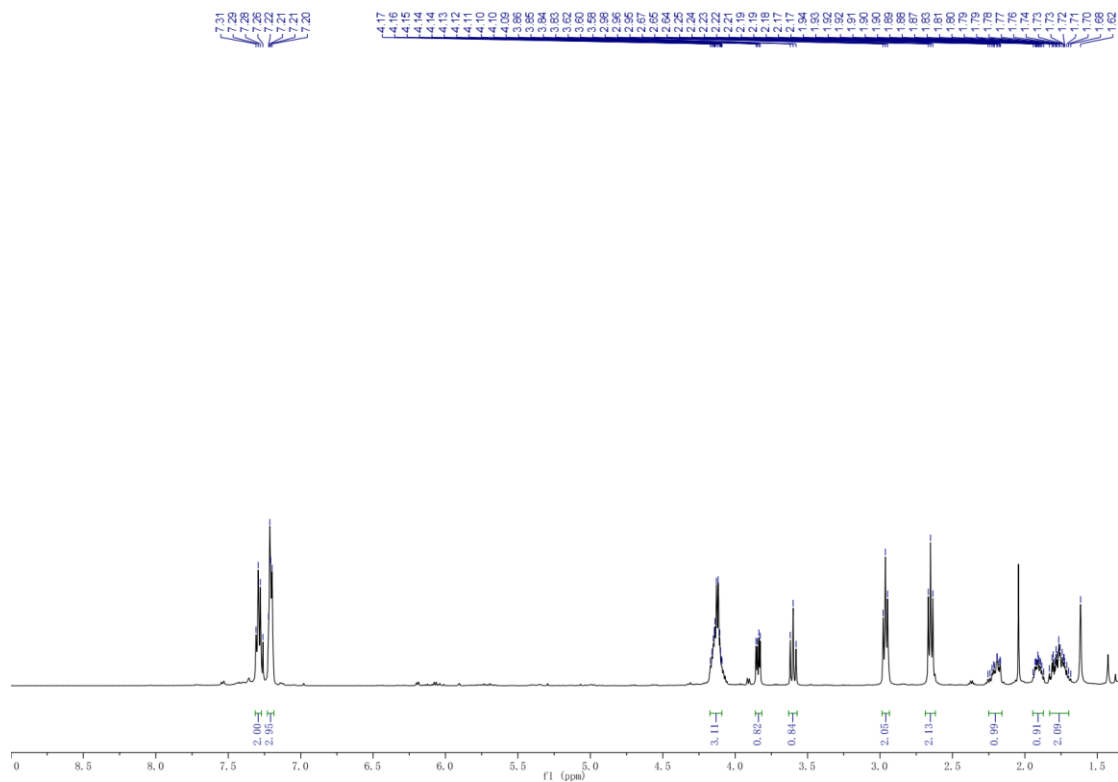

<sup>1</sup>H NMR of compound **96** (500 MHz, CDCl<sub>3</sub>)

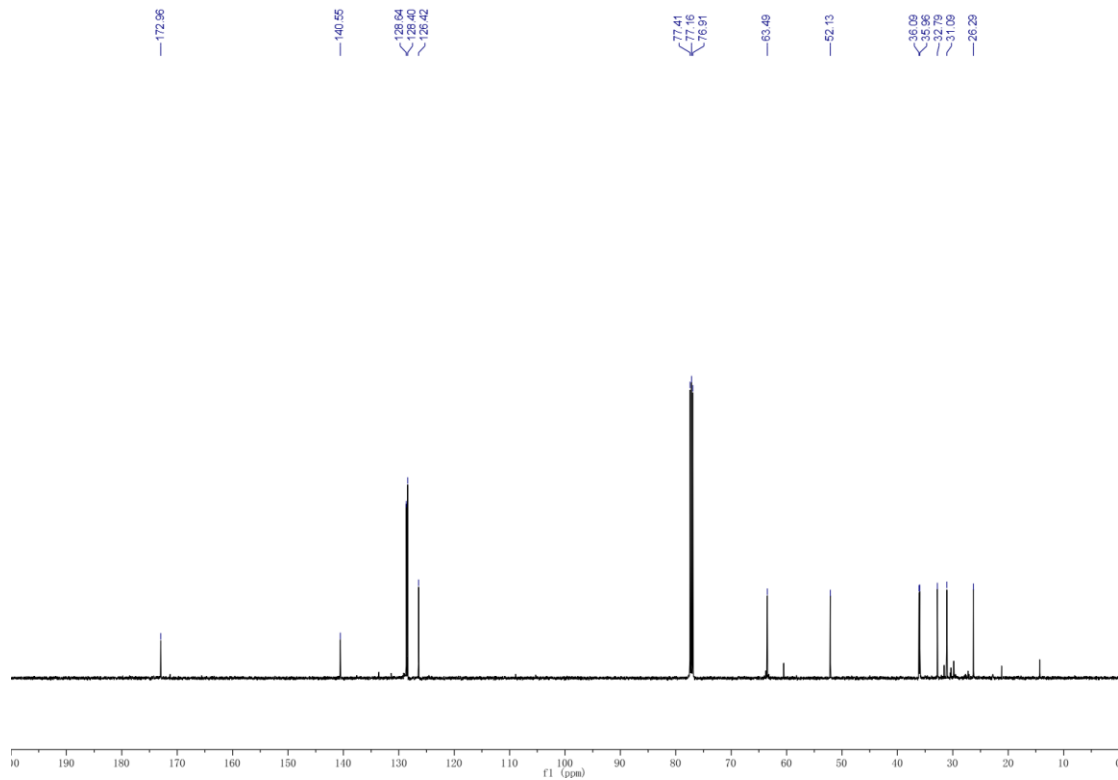

<sup>13</sup>C NMR of compound **96** (126 MHz, CDCl<sub>3</sub>)

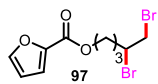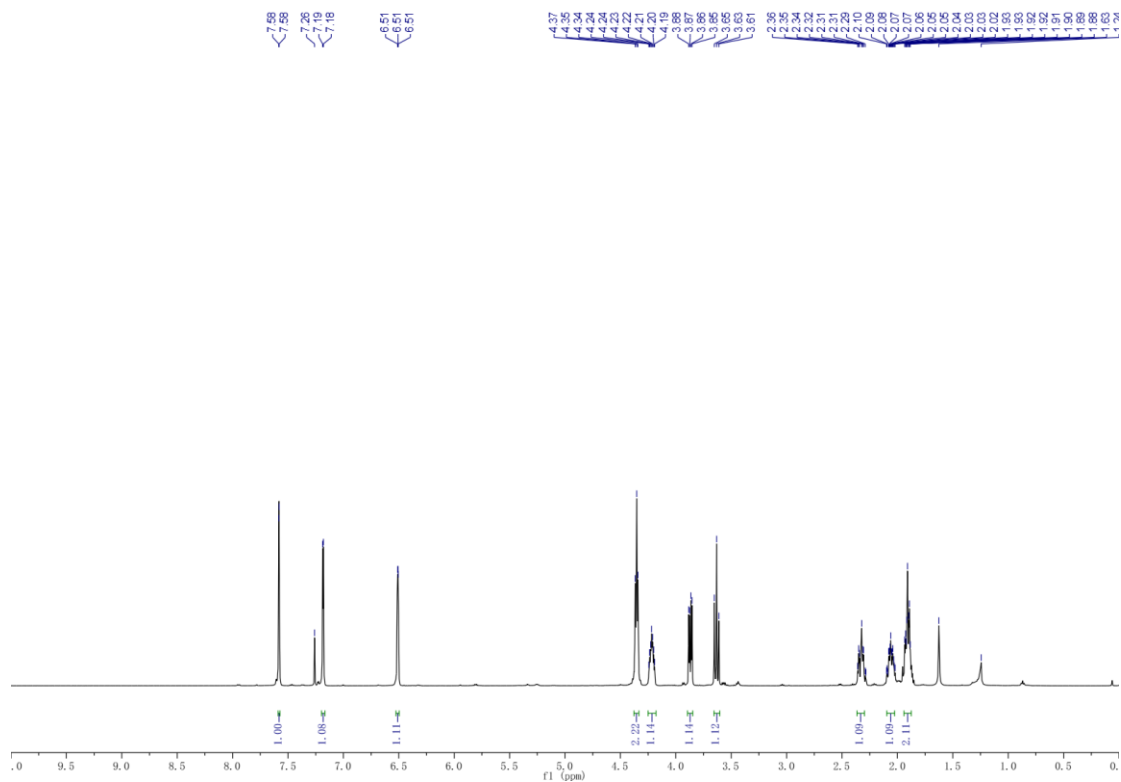

<sup>1</sup>H NMR of compound 97 (500 MHz, CDCl<sub>3</sub>)

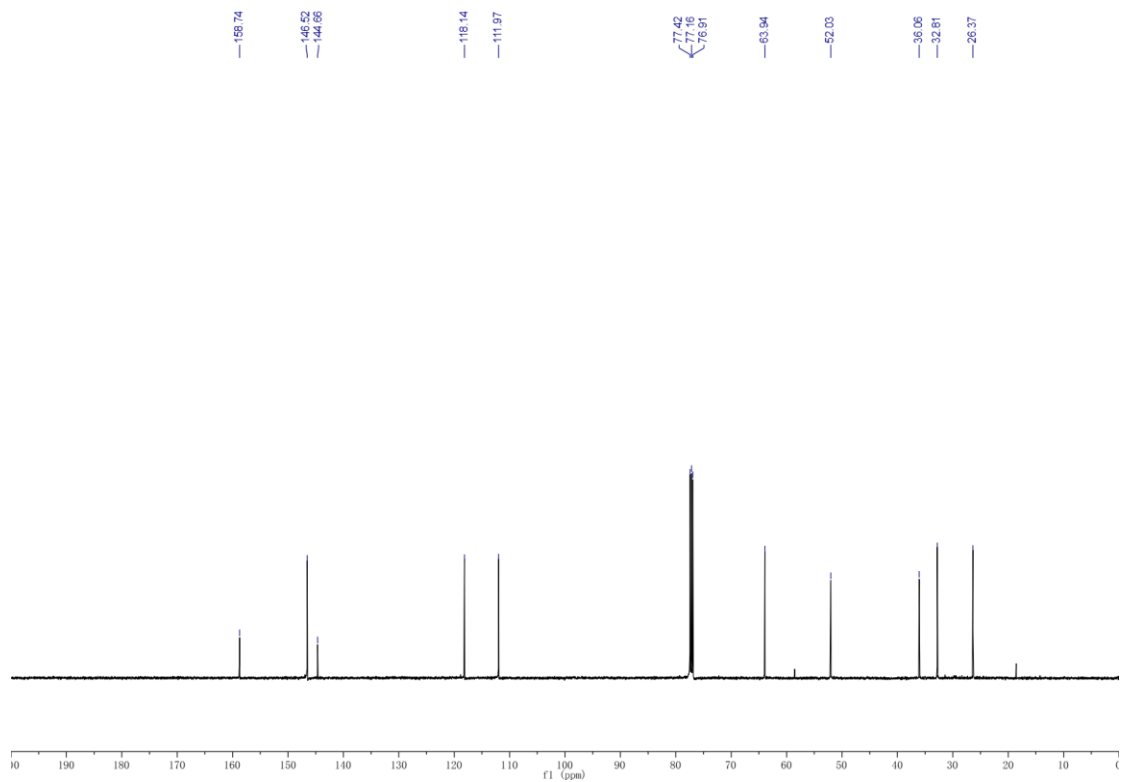

<sup>13</sup>C NMR of compound 97 (126 MHz, CDCl<sub>3</sub>)



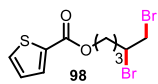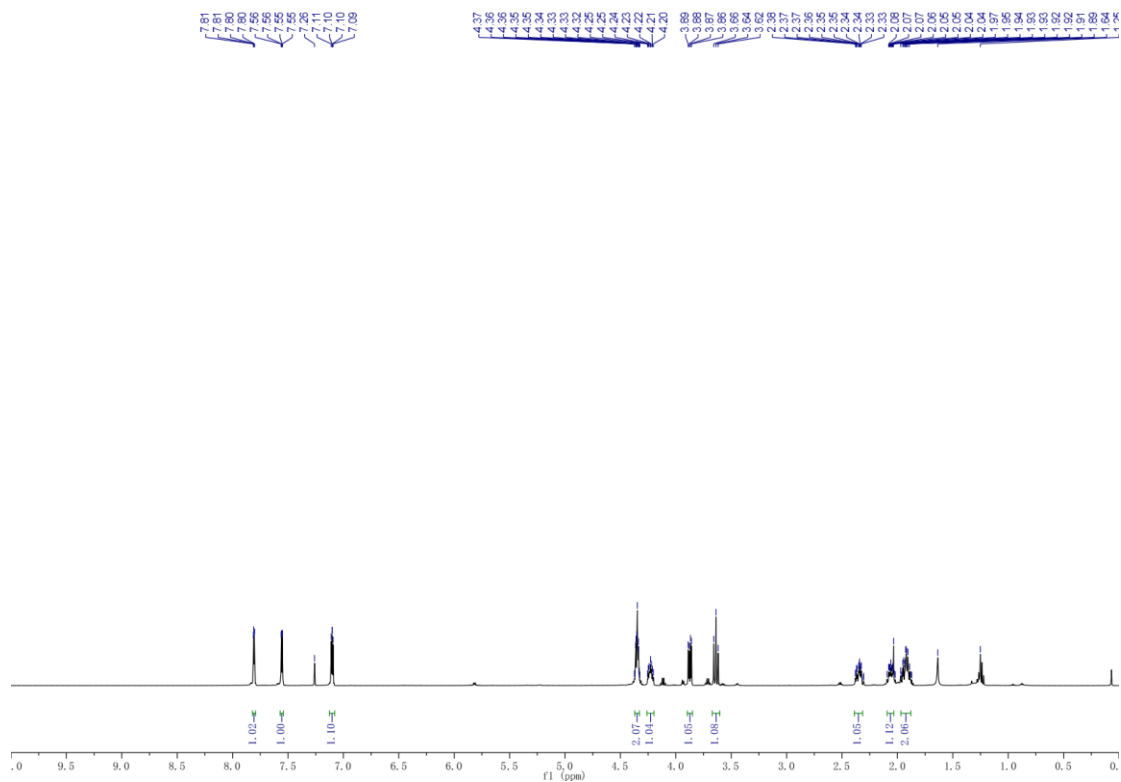

$^1\text{H}$  NMR of compound **98** (500 MHz,  $\text{CDCl}_3$ )

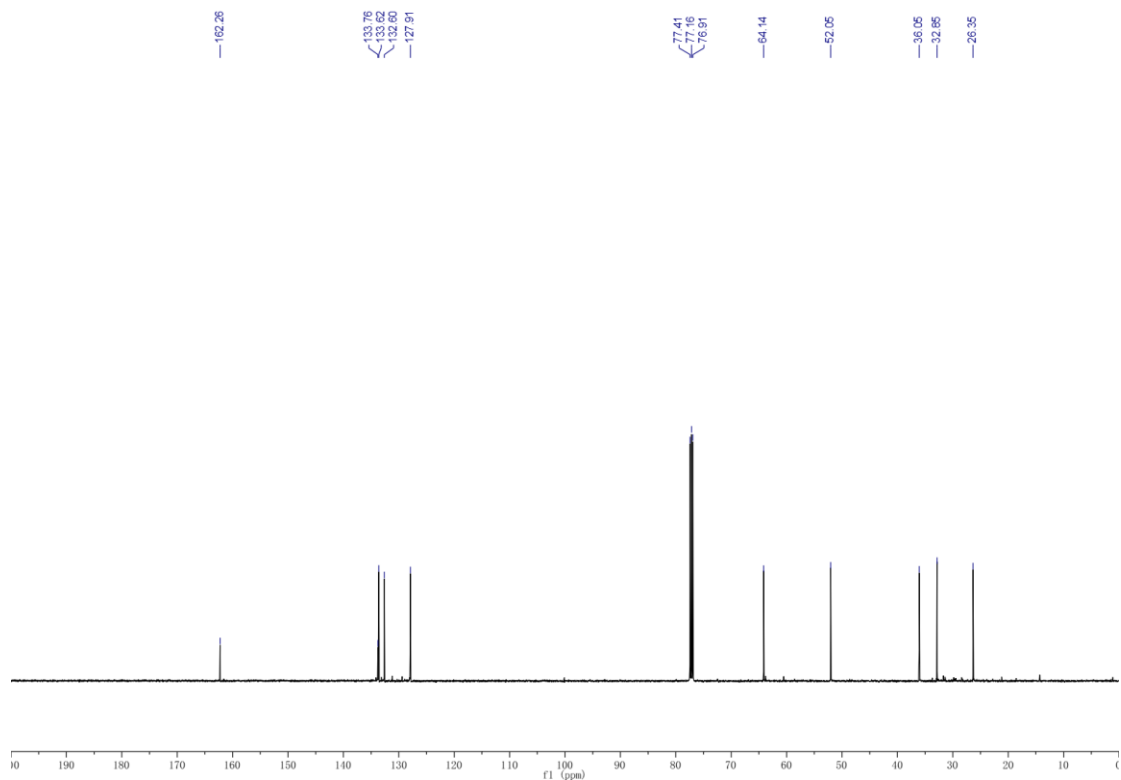

$^{13}\text{C}$  NMR of compound **98** (126 MHz,  $\text{CDCl}_3$ )

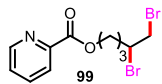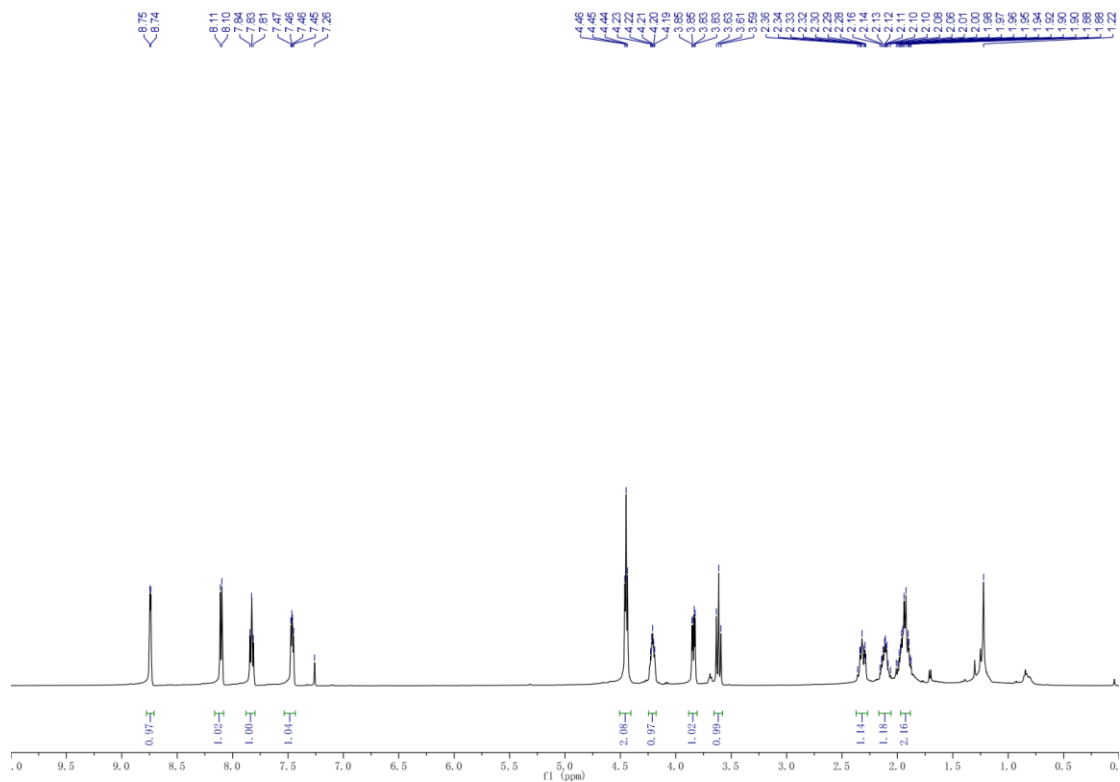

<sup>1</sup>H NMR of compound **99** (500 MHz, CDCl<sub>3</sub>)

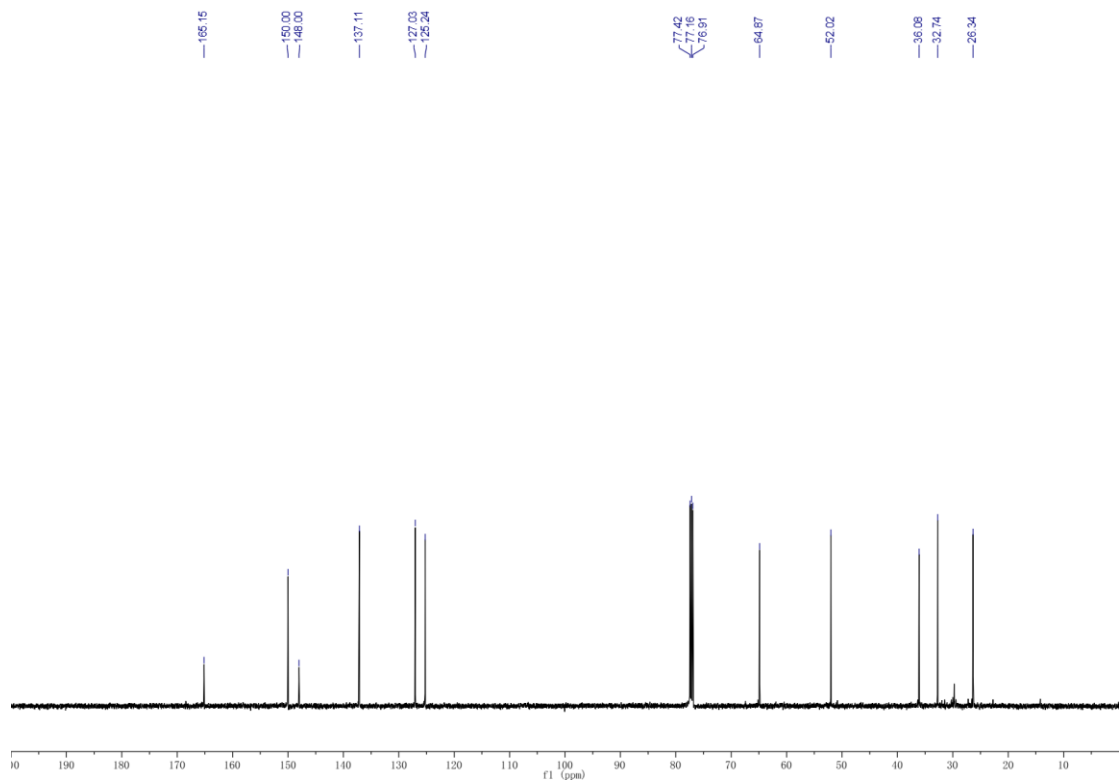

<sup>13</sup>C NMR of compound **99** (126 MHz, CDCl<sub>3</sub>)

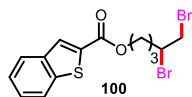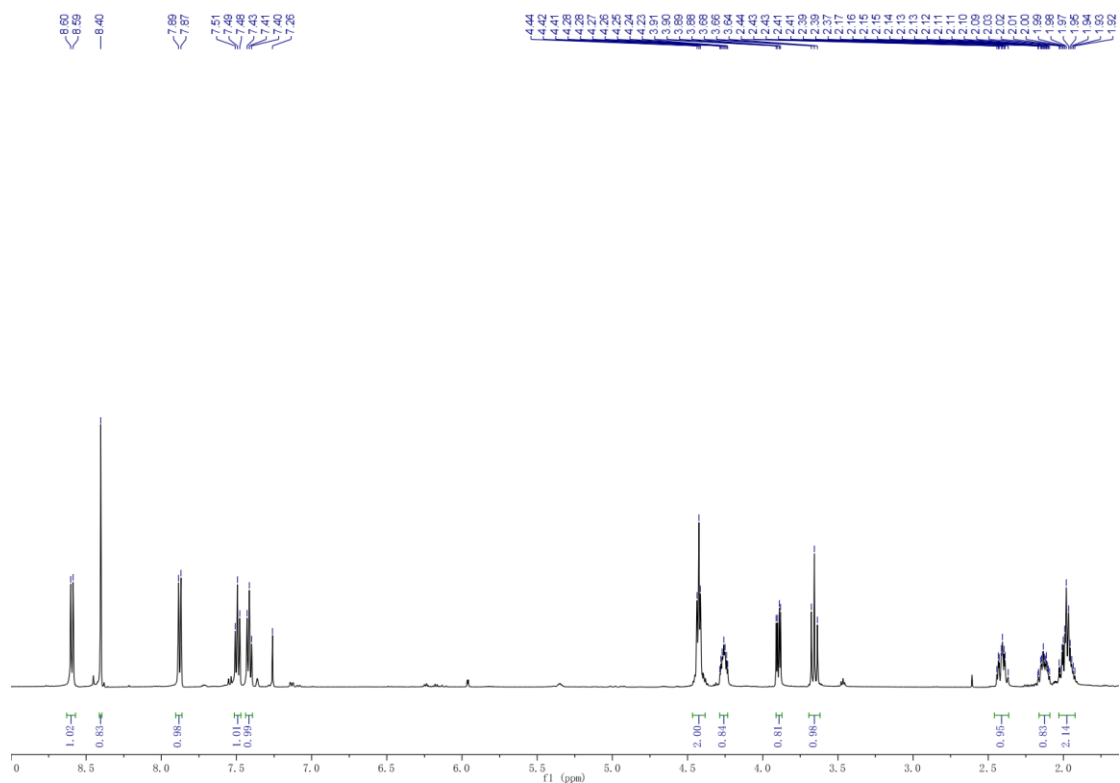

<sup>1</sup>H NMR of compound **100** (500 MHz, CDCl<sub>3</sub>)

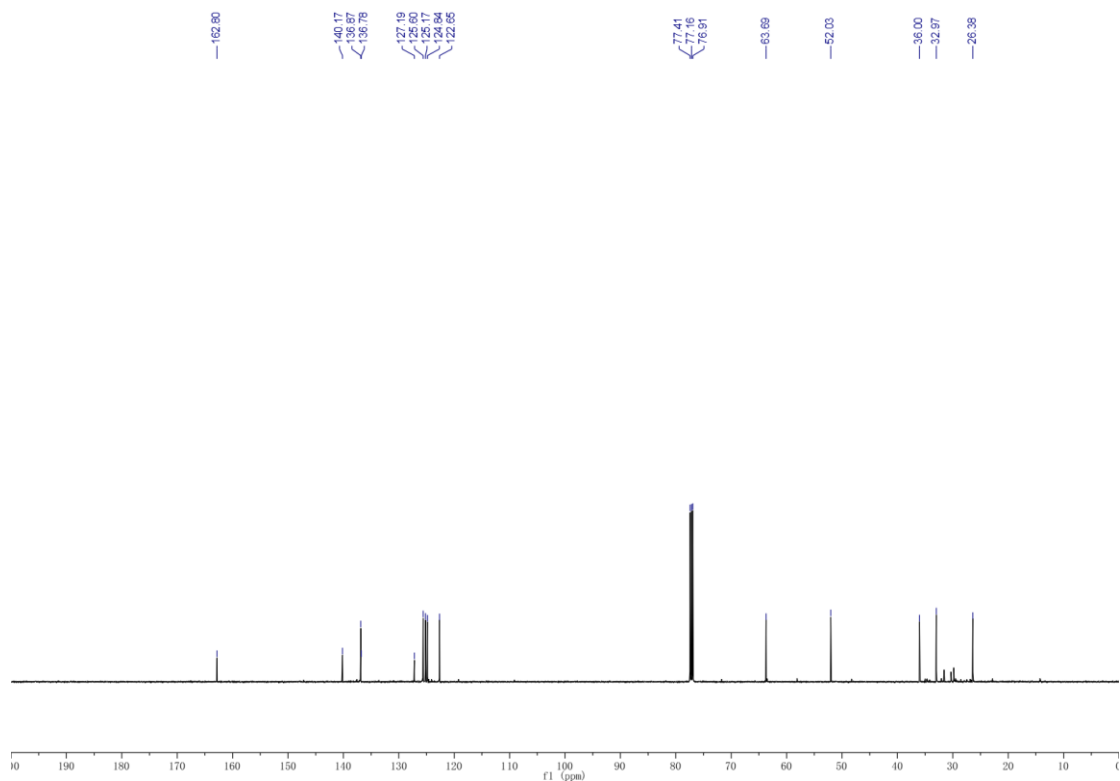

<sup>13</sup>C NMR of compound **100** (126 MHz, CDCl<sub>3</sub>)

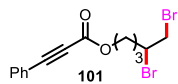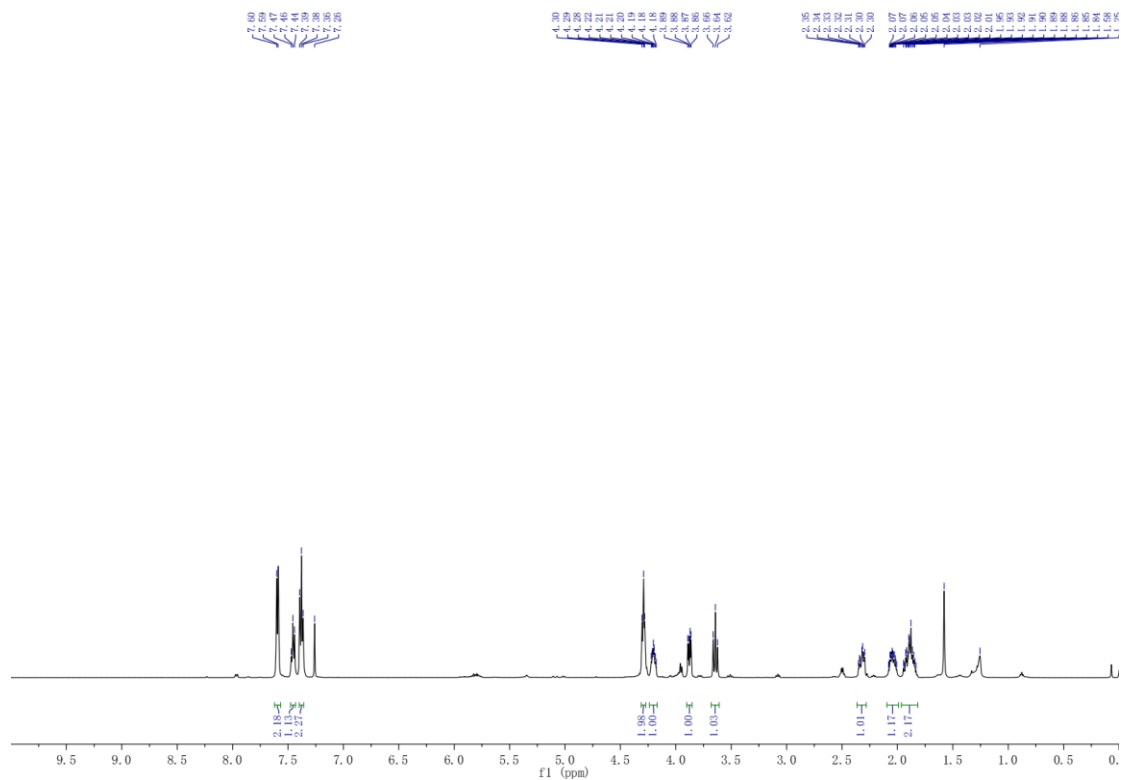

<sup>1</sup>H NMR of compound **101** (500 MHz, CDCl<sub>3</sub>)

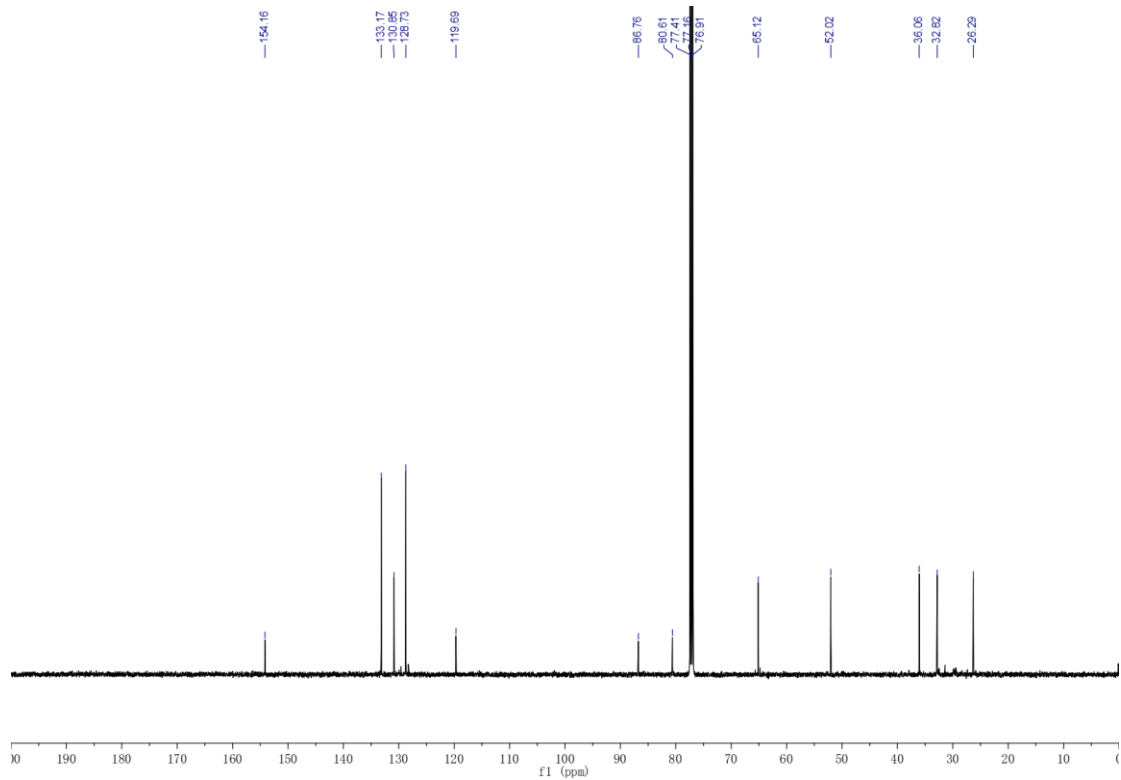

<sup>13</sup>C NMR of compound **101** (126 MHz, CDCl<sub>3</sub>)

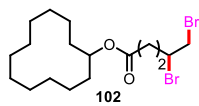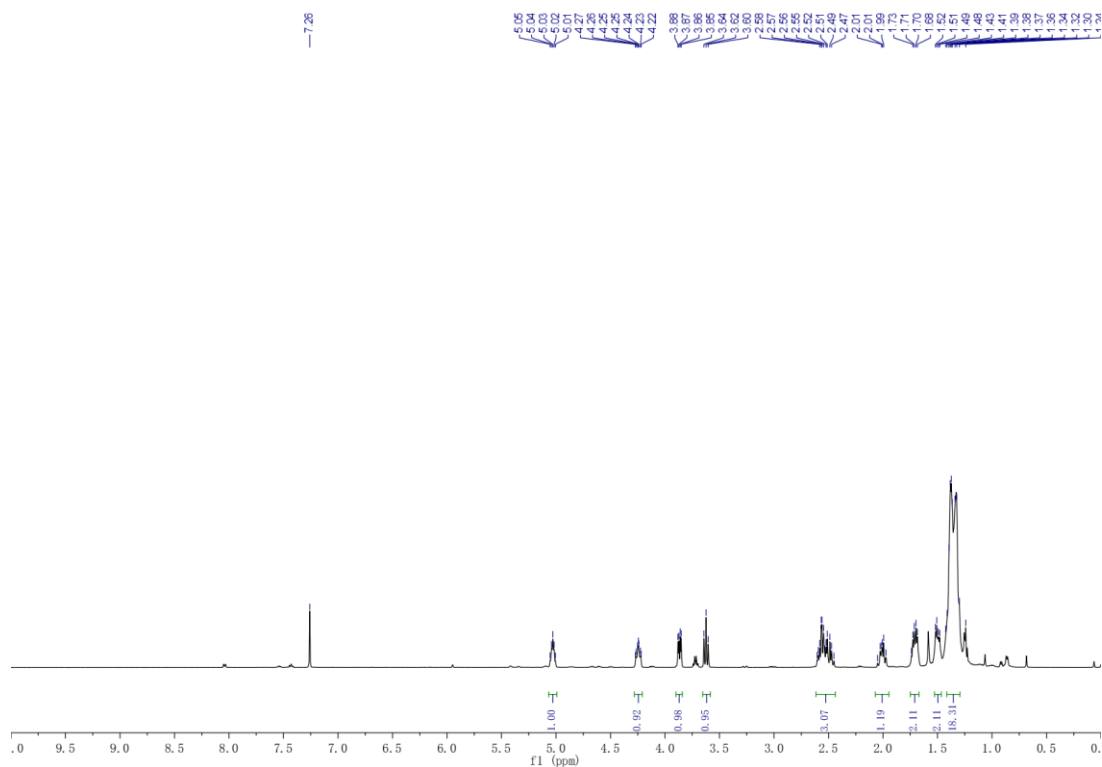

$^1\text{H}$  NMR of compound **102** (500 MHz,  $\text{CDCl}_3$ )

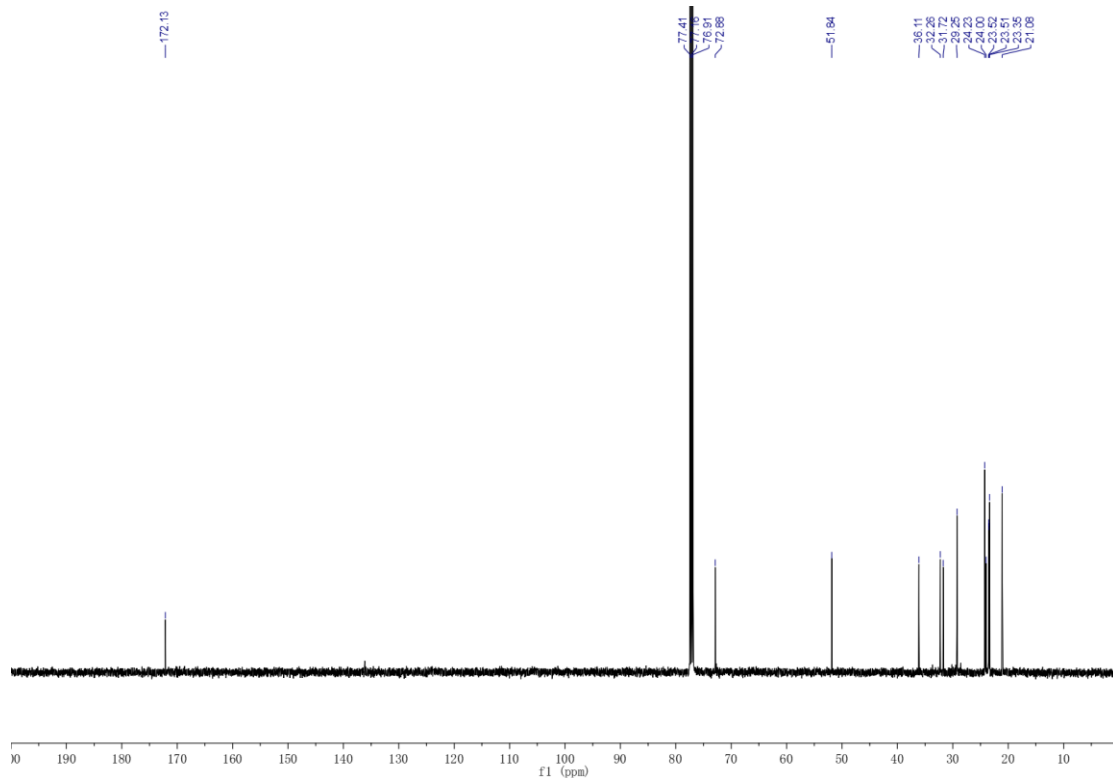

$^{13}\text{C}$  NMR of compound **102** (126 MHz,  $\text{CDCl}_3$ )

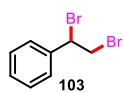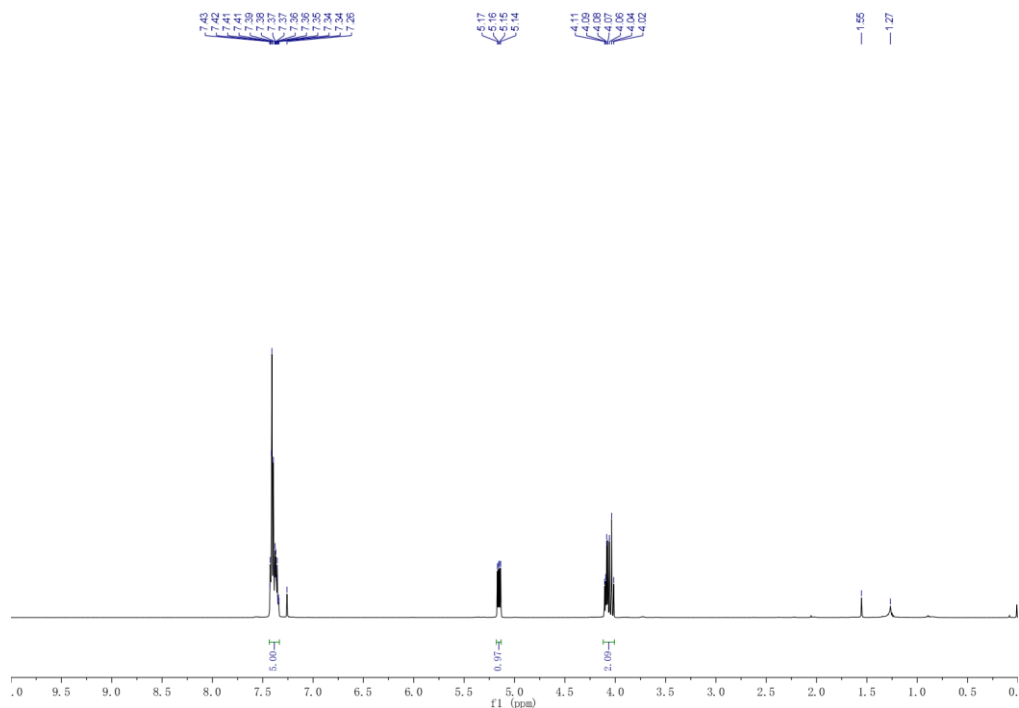

<sup>1</sup>H NMR of compound **103** (500 MHz, CDCl<sub>3</sub>)

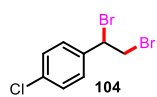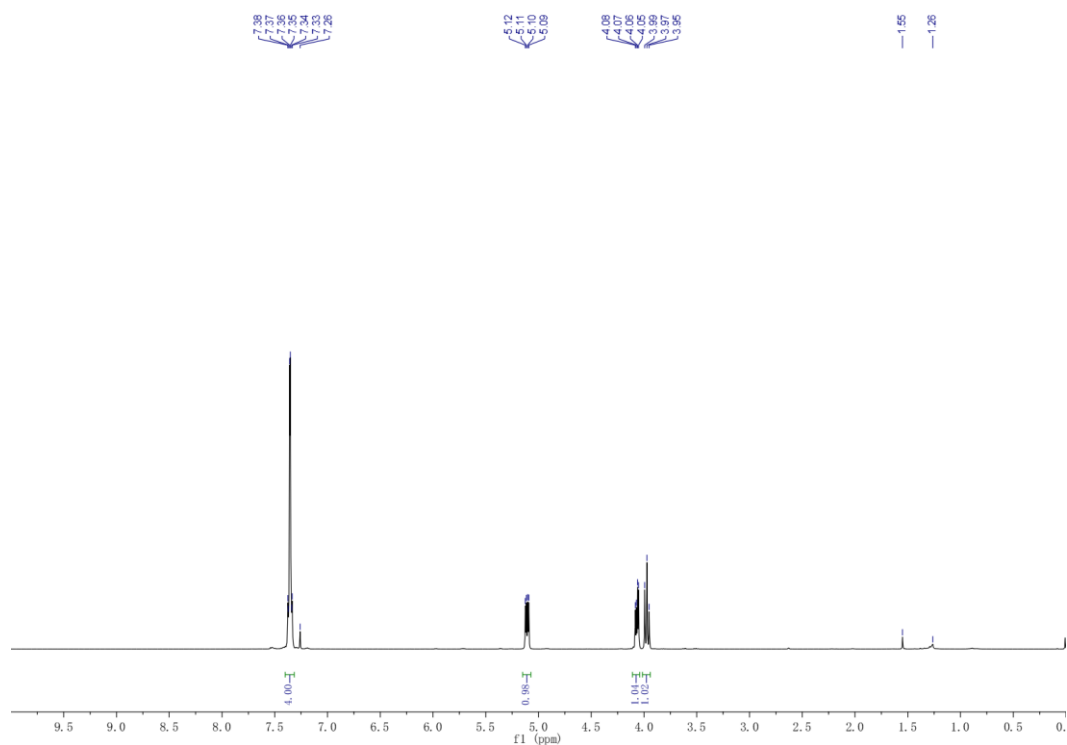

<sup>1</sup>H NMR of compound **104** (500 MHz, CDCl<sub>3</sub>)

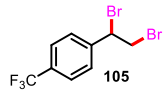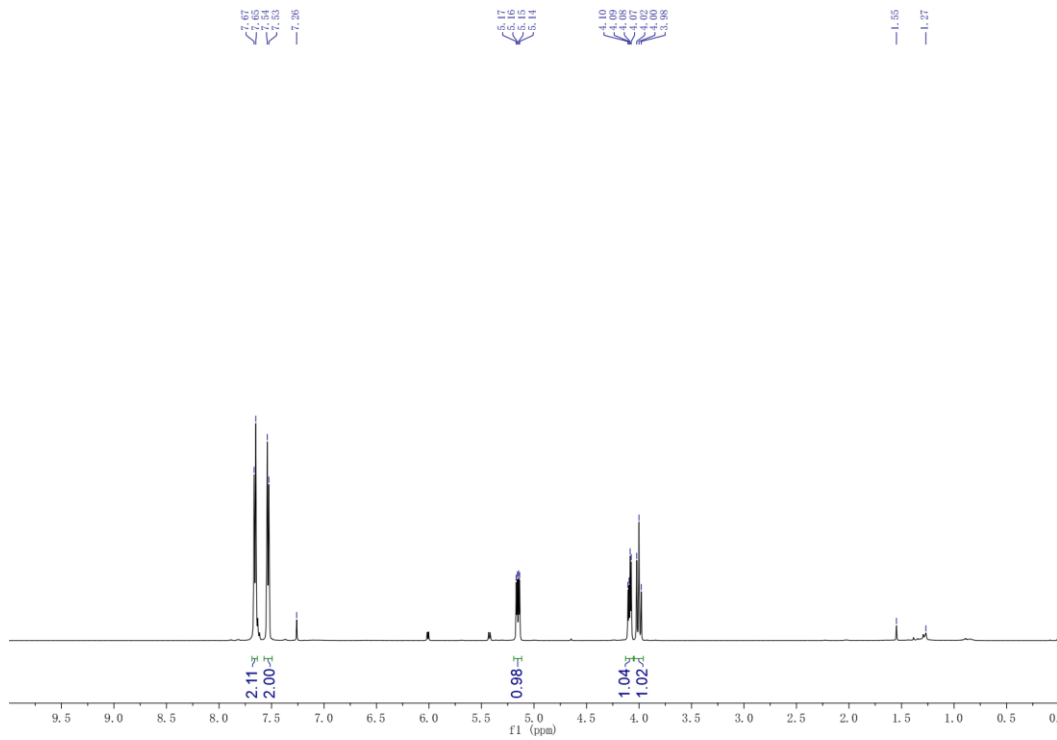

<sup>1</sup>H NMR of compound **105** (500 MHz, CDCl<sub>3</sub>)

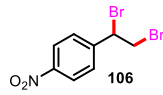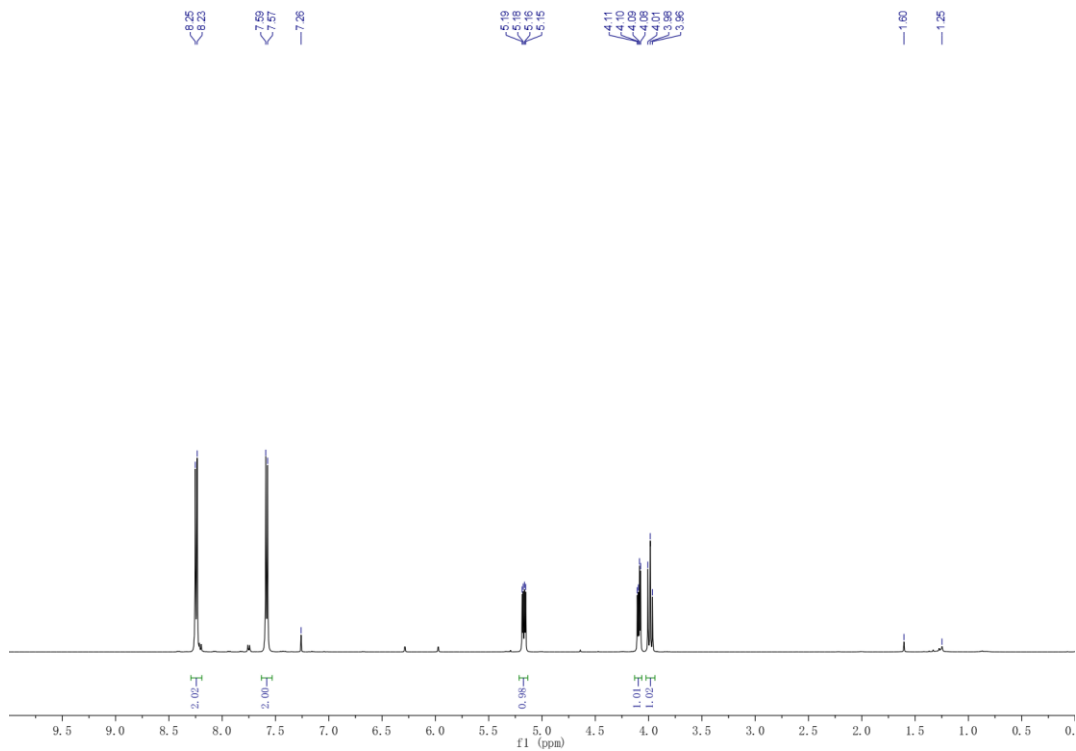

<sup>1</sup>H NMR of compound **106** (500 MHz, CDCl<sub>3</sub>)

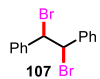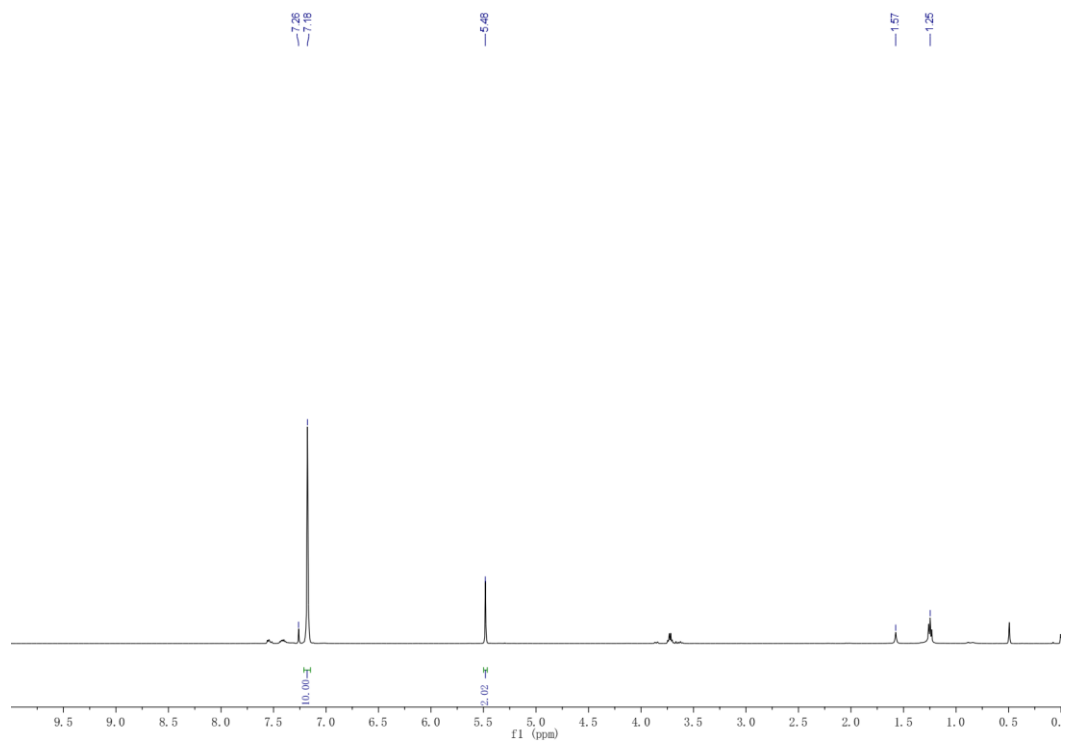

$^1\text{H}$  NMR of compound **107** (500 MHz,  $\text{CDCl}_3$ )



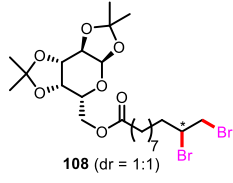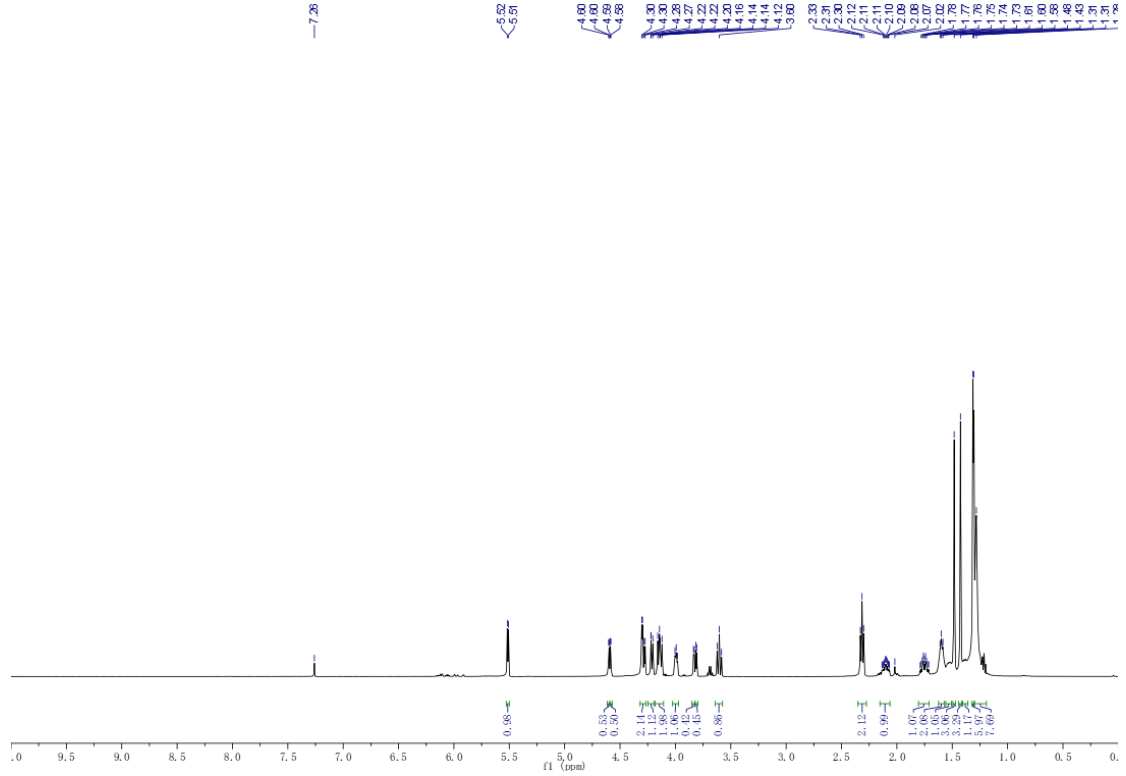

**<sup>1</sup>H NMR of compound 108 (500 MHz, CDCl<sub>3</sub>)**

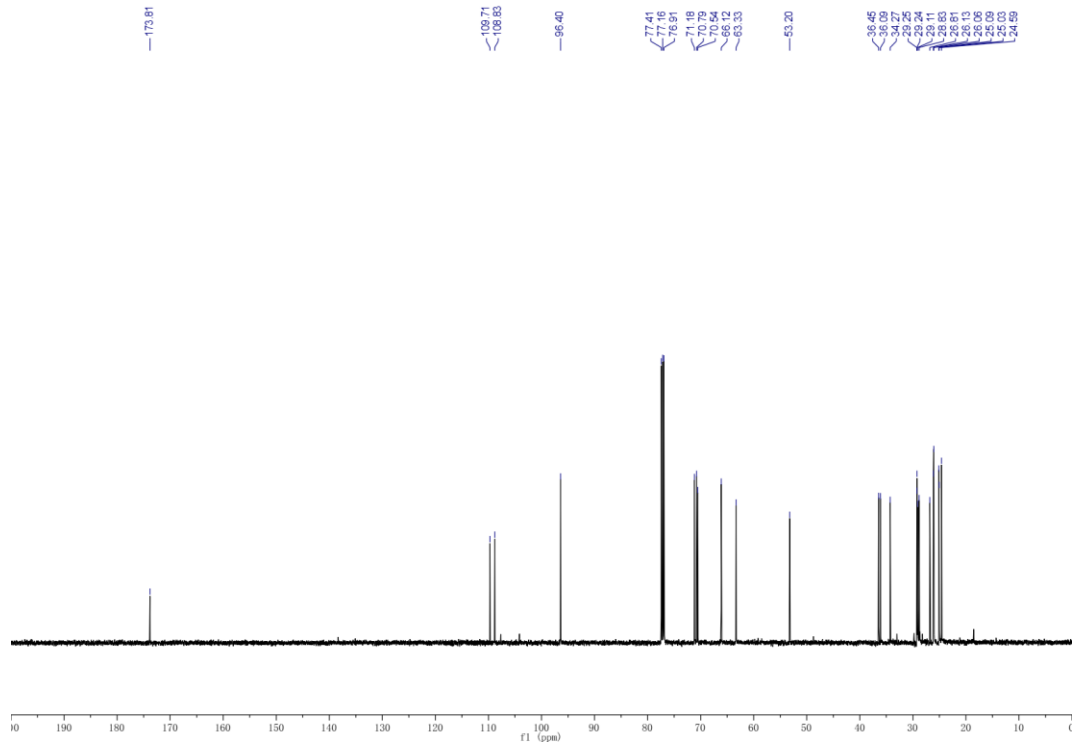

**<sup>13</sup>C NMR of compound 108 (126 MHz, CDCl<sub>3</sub>)**

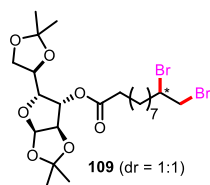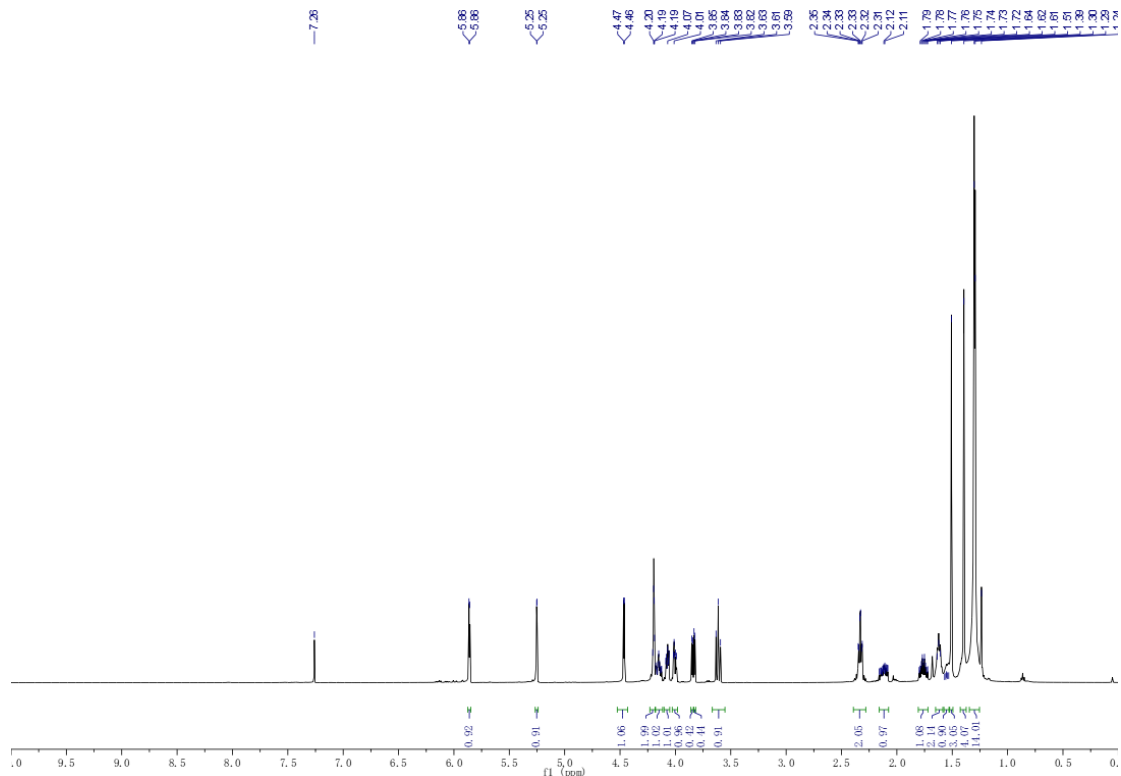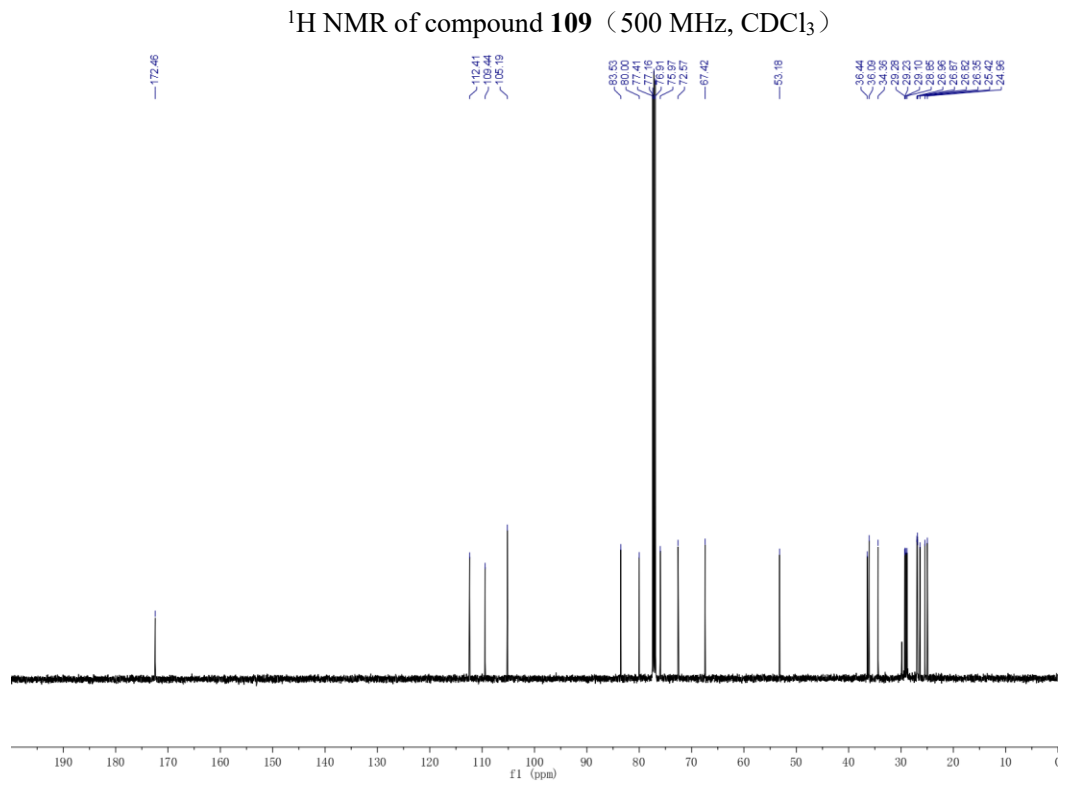

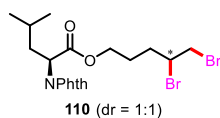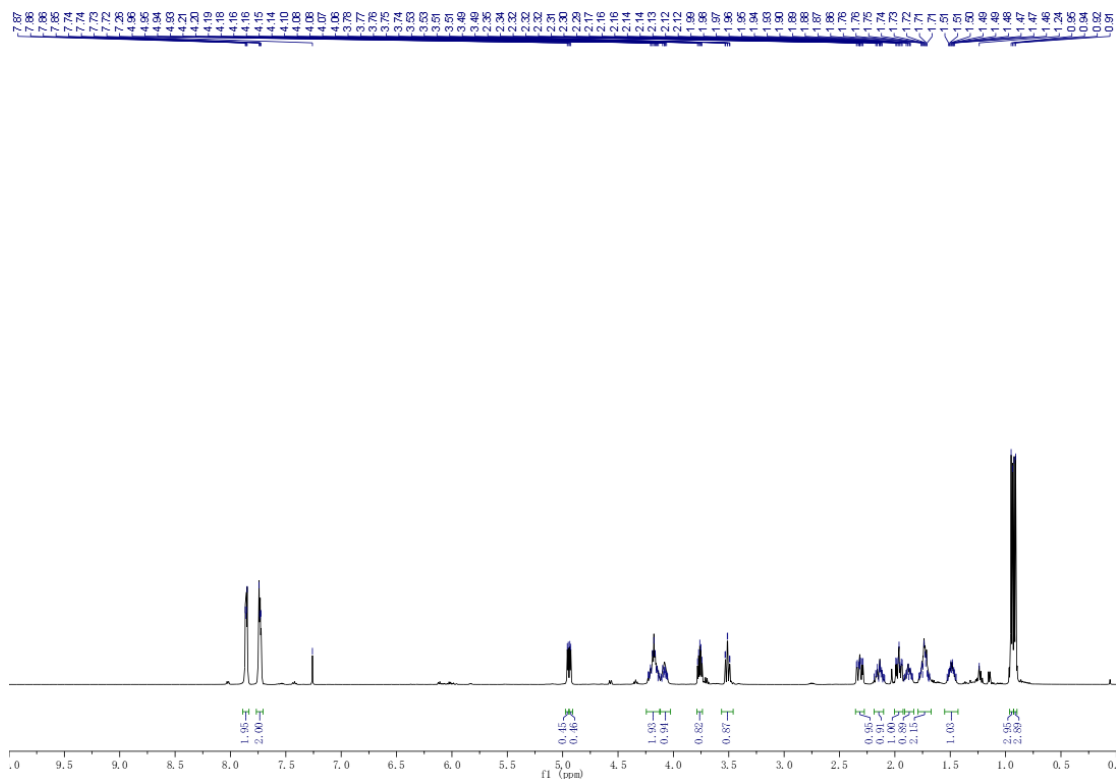

<sup>1</sup>H NMR of compound **110** (500 MHz, CDCl<sub>3</sub>)

169.62  
 167.62  
 134.31  
 131.89  
 123.67  
 77.41  
 77.16  
 76.91  
 64.72  
 51.68  
 51.64  
 50.75  
 37.40  
 35.94  
 32.69  
 25.98  
 25.38  
 21.15

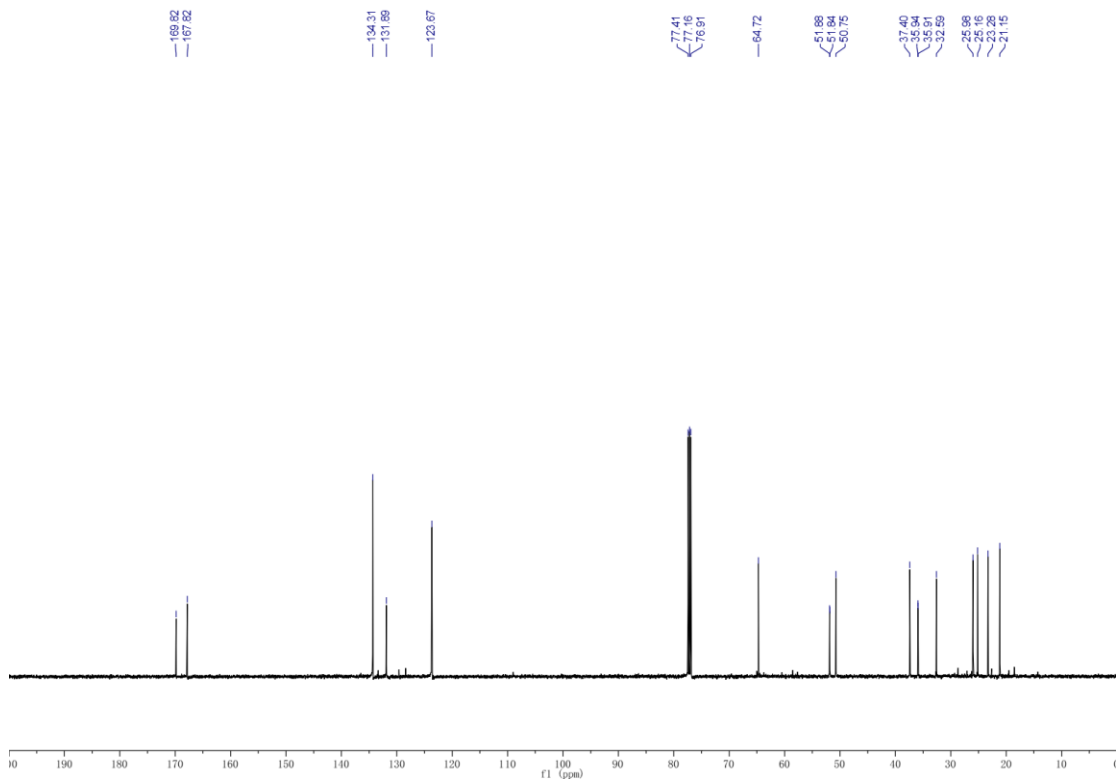

<sup>13</sup>C NMR of compound **110** (126 MHz, CDCl<sub>3</sub>)

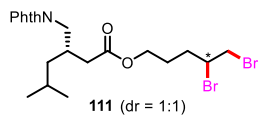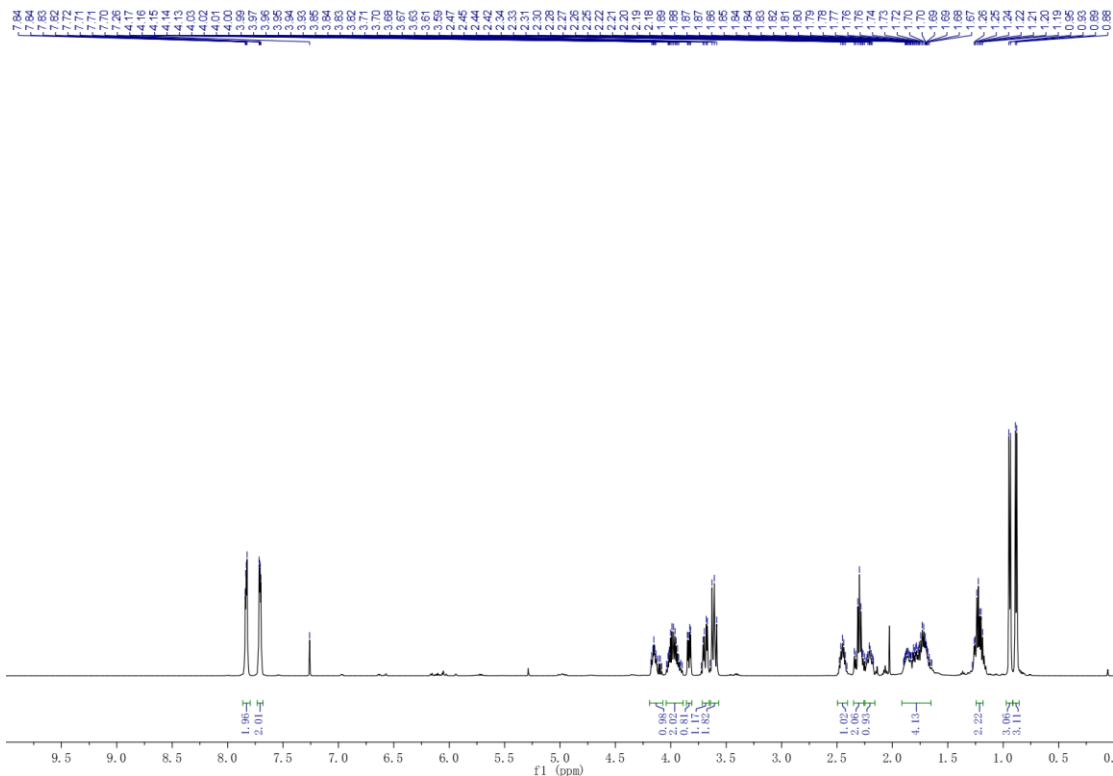

<sup>1</sup>H NMR of compound **111** (500 MHz, CDCl<sub>3</sub>)

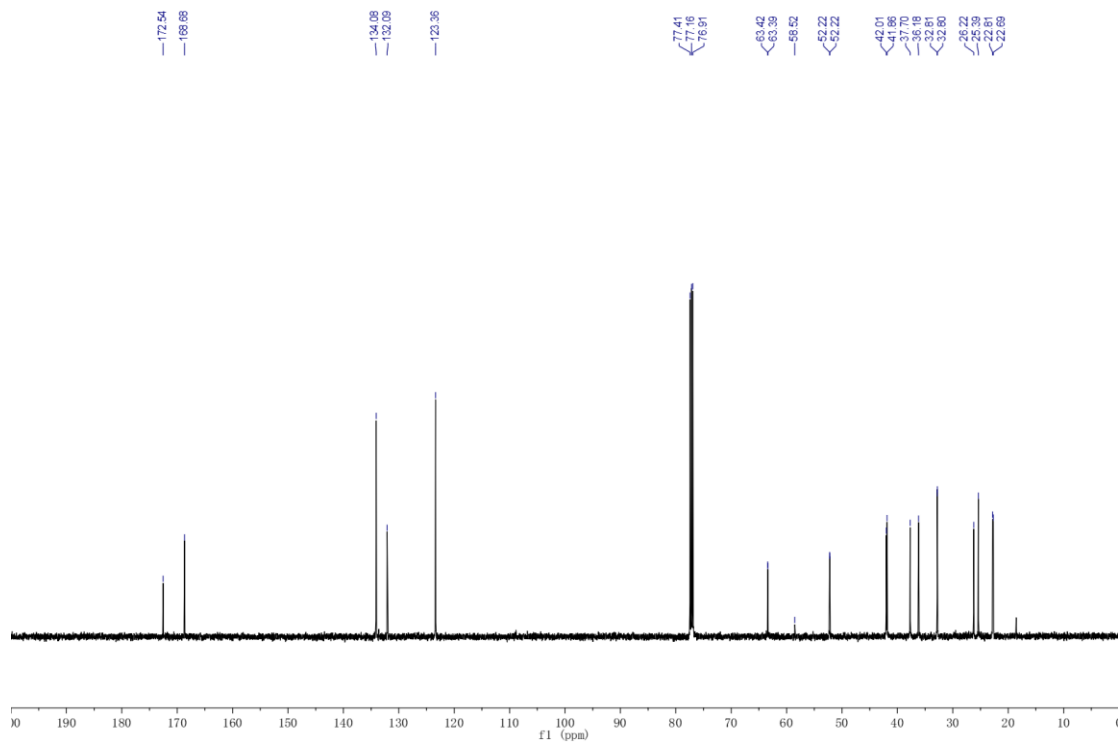

<sup>13</sup>C NMR of compound **111** (126 MHz, CDCl<sub>3</sub>)

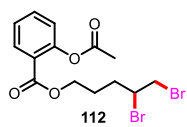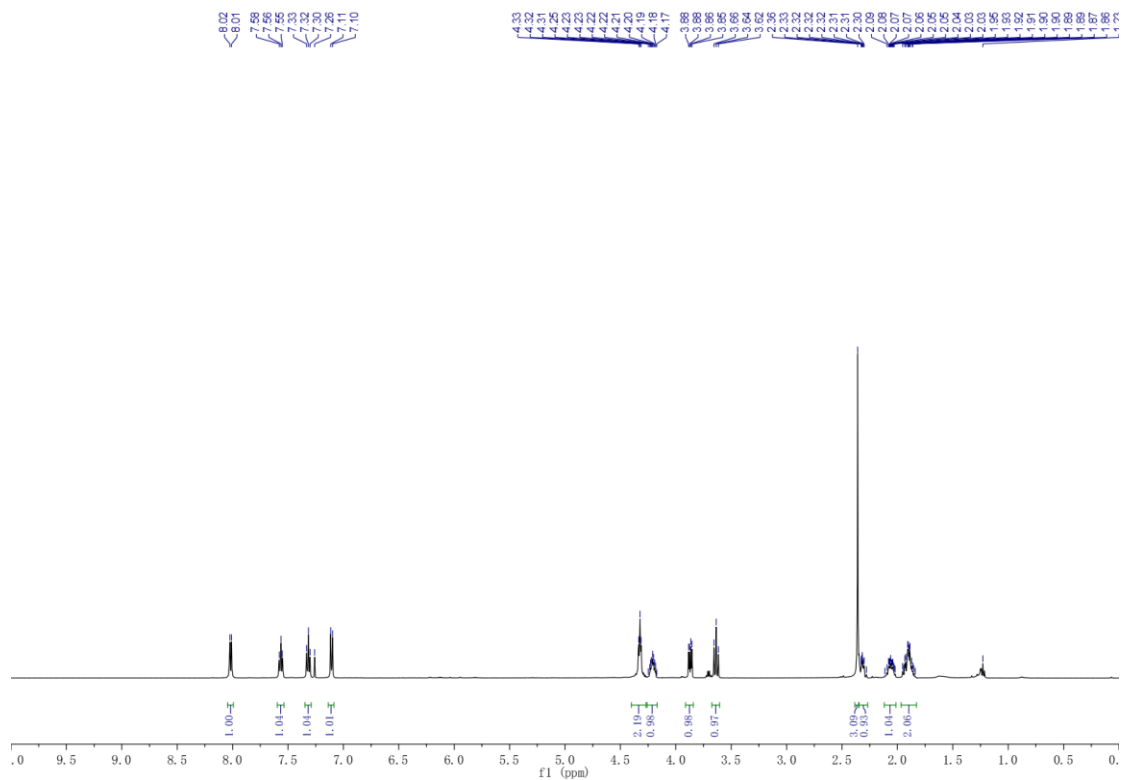

<sup>1</sup>H NMR of compound **112** (500 MHz, CDCl<sub>3</sub>)

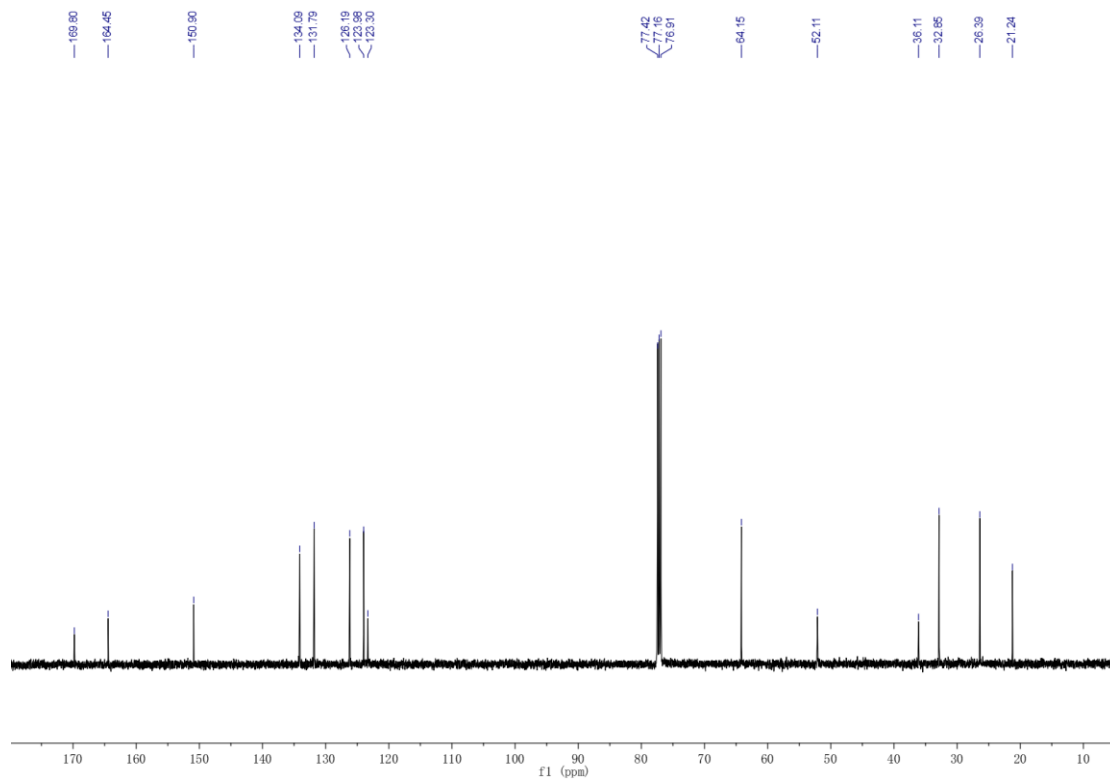

<sup>13</sup>C NMR of compound **112** (126 MHz, CDCl<sub>3</sub>)

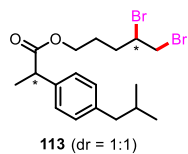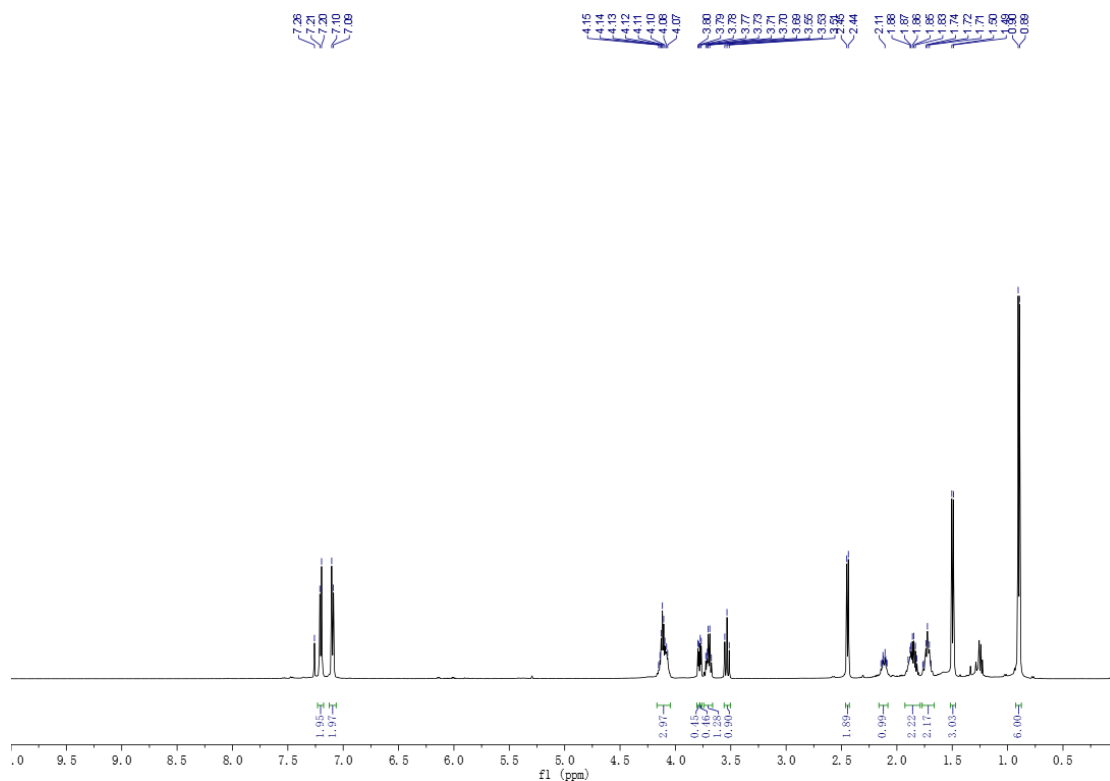

<sup>1</sup>H NMR of compound **113** (500 MHz, CDCl<sub>3</sub>)

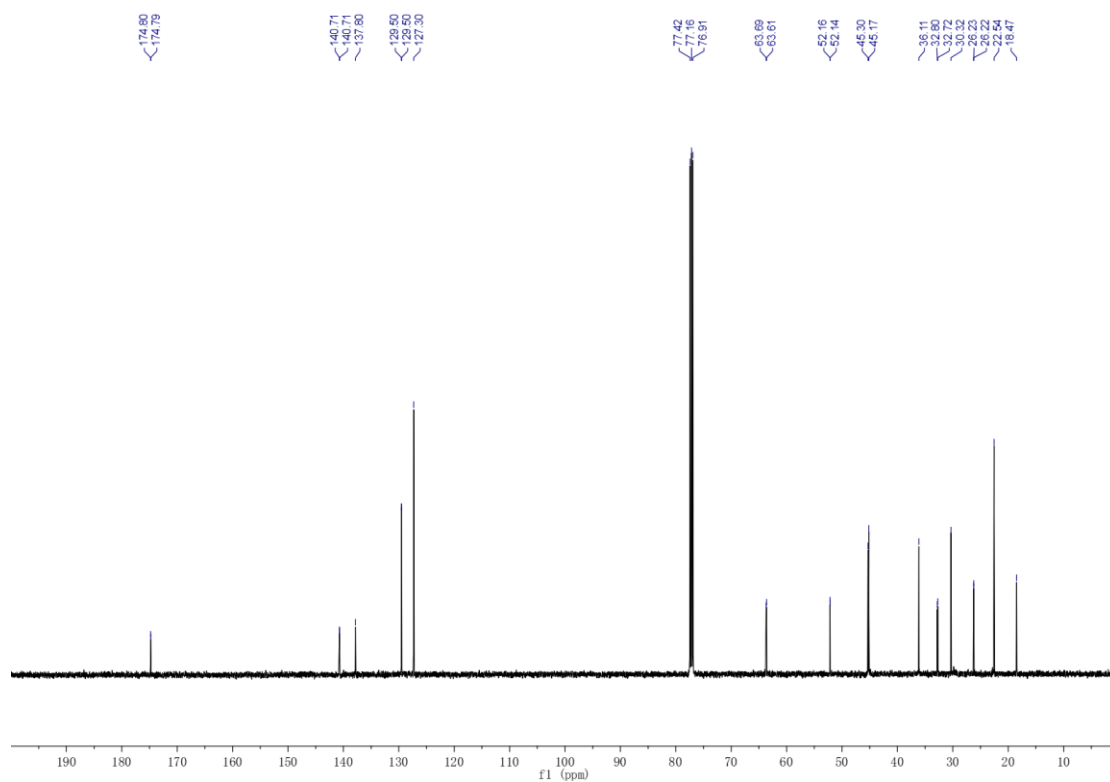

<sup>13</sup>C NMR of compound **113** (126 MHz, CDCl<sub>3</sub>)

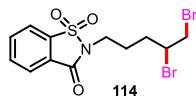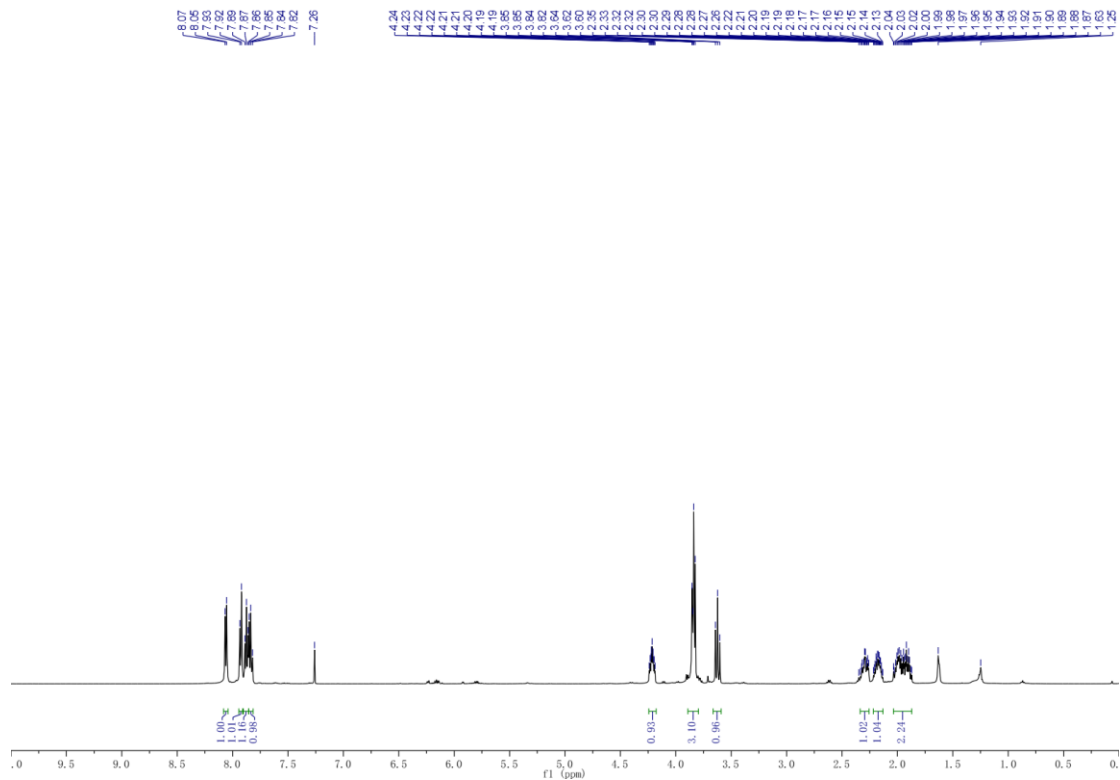

<sup>1</sup>H NMR of compound **114** (500 MHz, CDCl<sub>3</sub>)

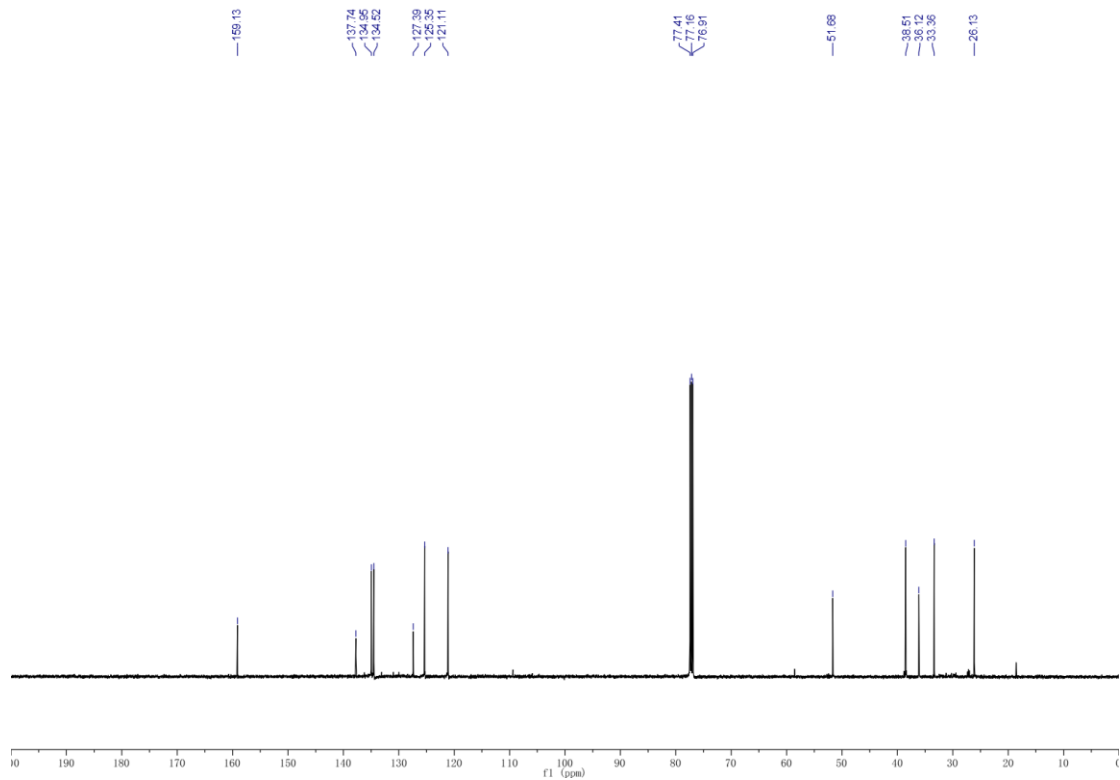

<sup>13</sup>C NMR of compound **114** (126 MHz, CDCl<sub>3</sub>)

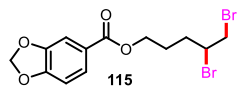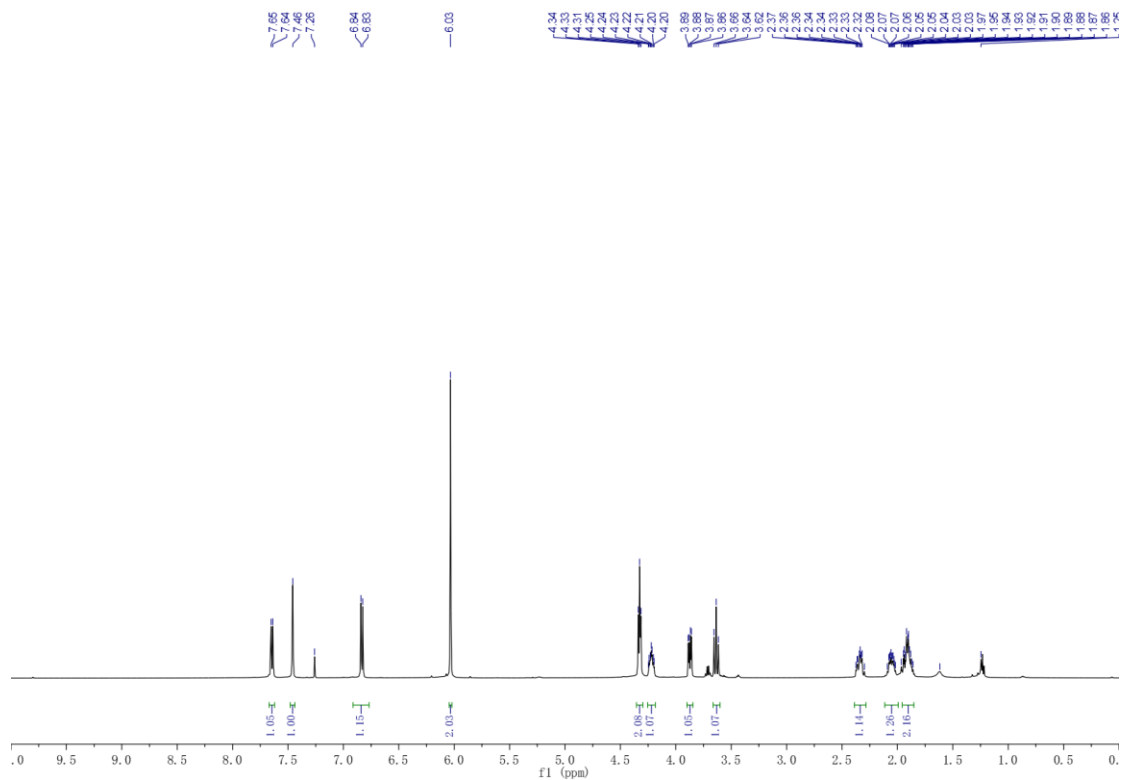

<sup>1</sup>H NMR of compound **115** (500 MHz, CDCl<sub>3</sub>)

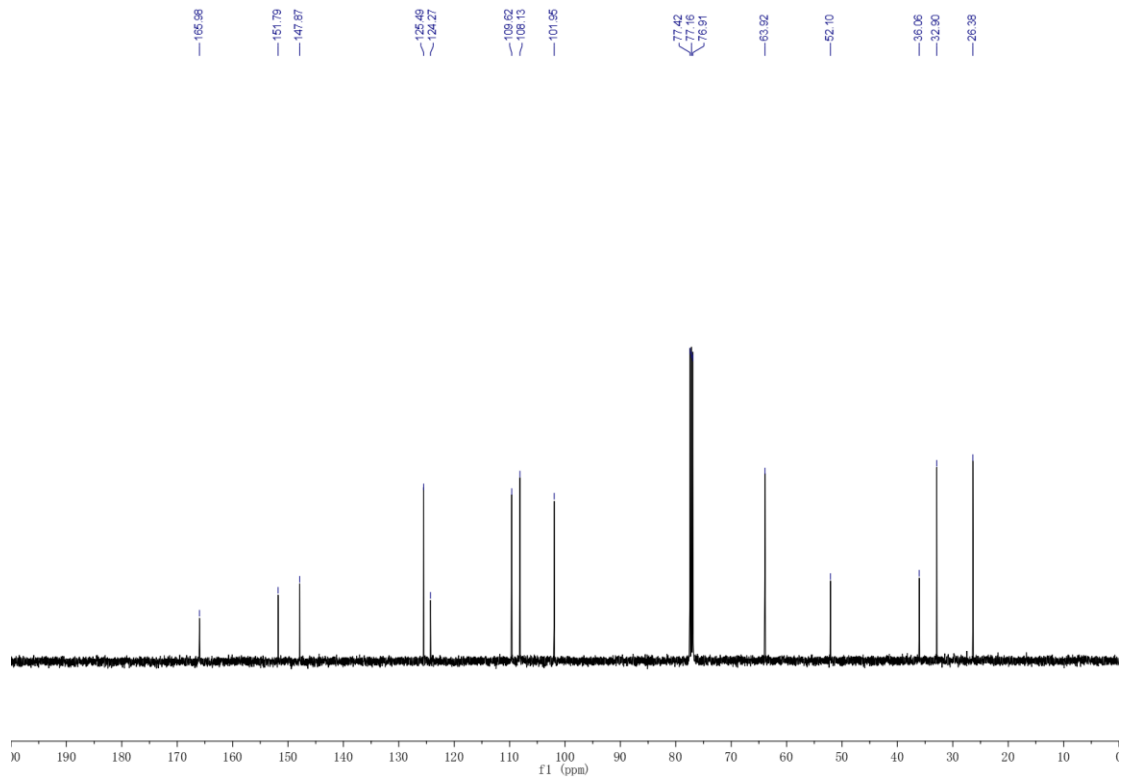

<sup>13</sup>C NMR of compound **115** (126 MHz, CDCl<sub>3</sub>)



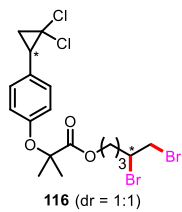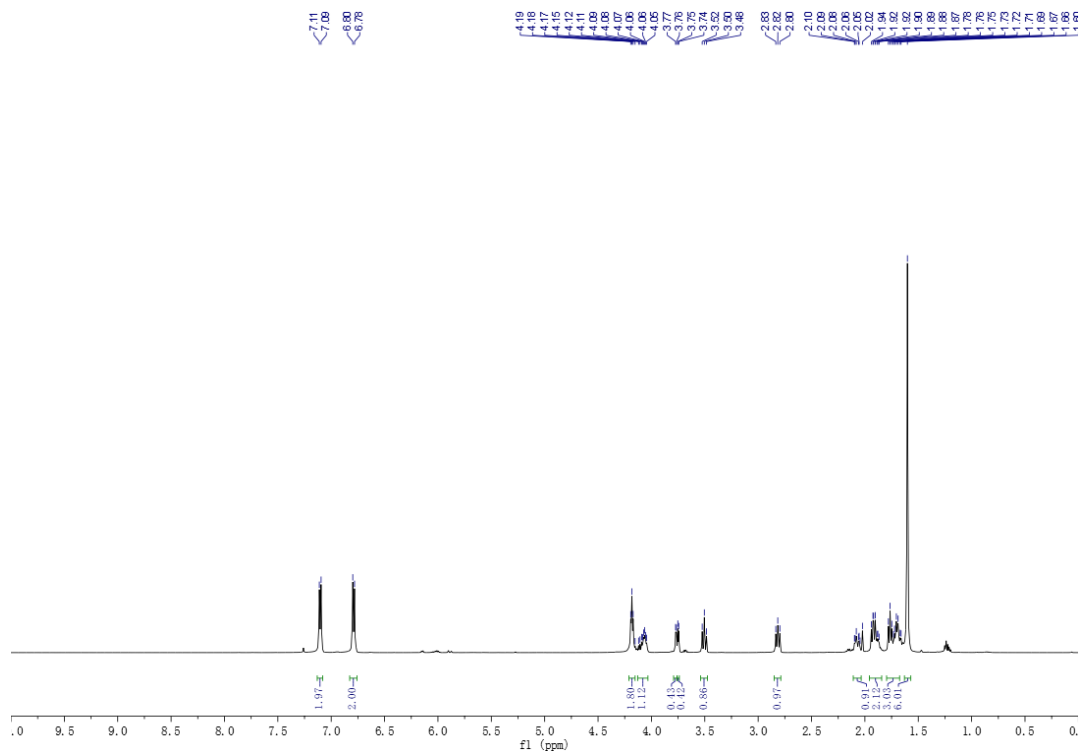

<sup>1</sup>H NMR of compound **116** (500 MHz, CDCl<sub>3</sub>)

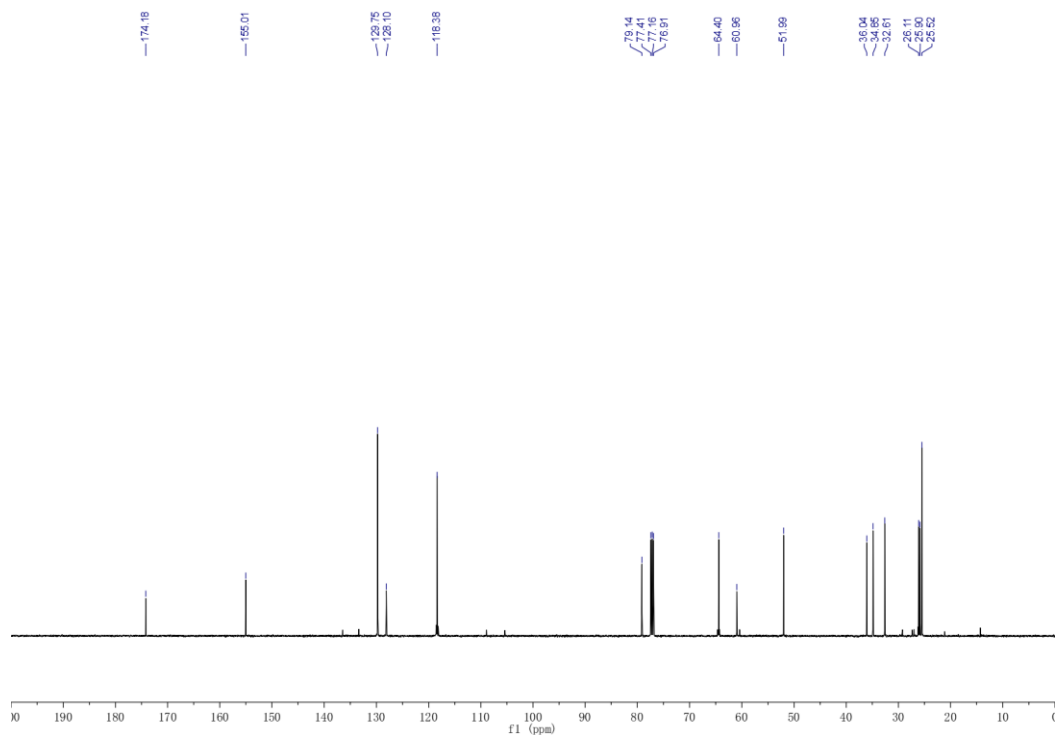

<sup>13</sup>C NMR of compound **116** (126 MHz, CDCl<sub>3</sub>)

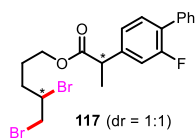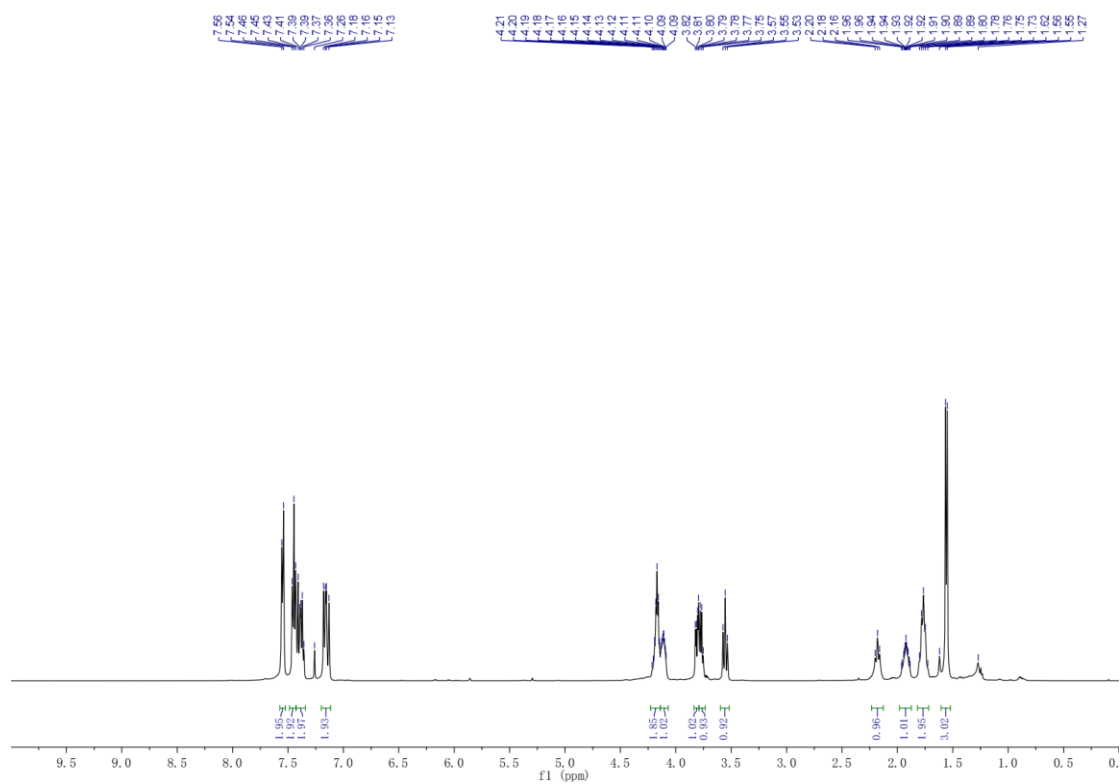

<sup>1</sup>H NMR of compound **117** (500 MHz, CDCl<sub>3</sub>)

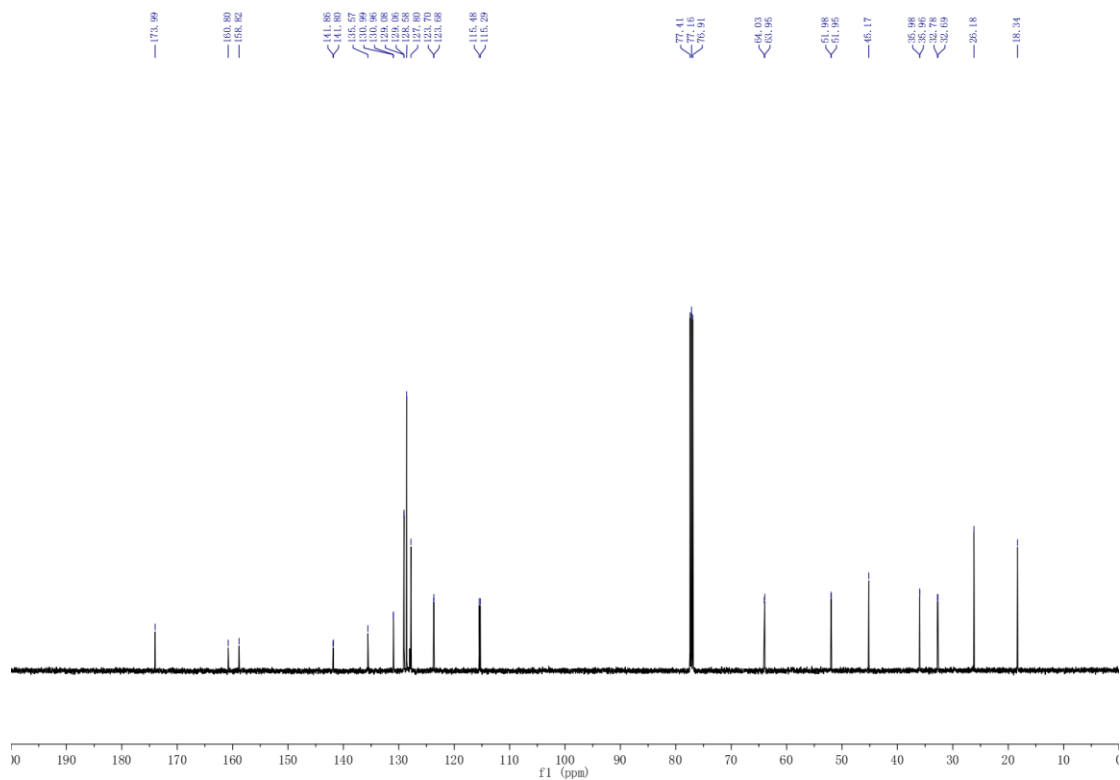

<sup>13</sup>C NMR of compound **117** (126 MHz, CDCl<sub>3</sub>)

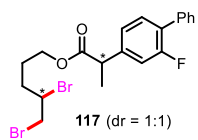

-117.45  
-117.47  
-117.50  
-117.52

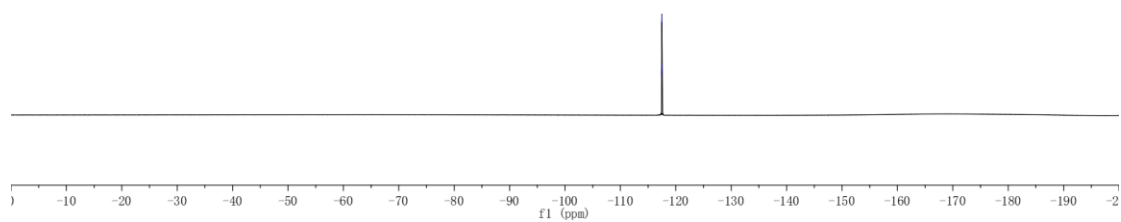

$^{19}\text{F}$  NMR of compound **117** (471 MHz,  $\text{CDCl}_3$ )

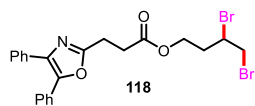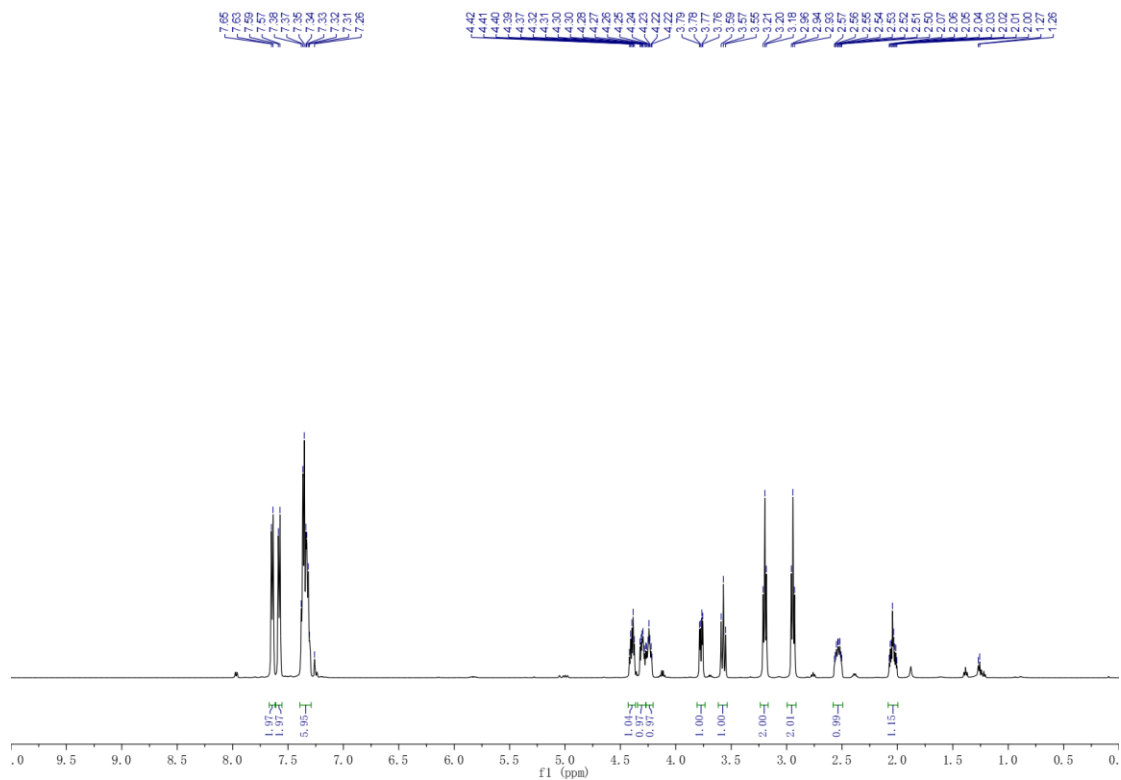

<sup>1</sup>H NMR of compound **118** (500 MHz, CDCl<sub>3</sub>)

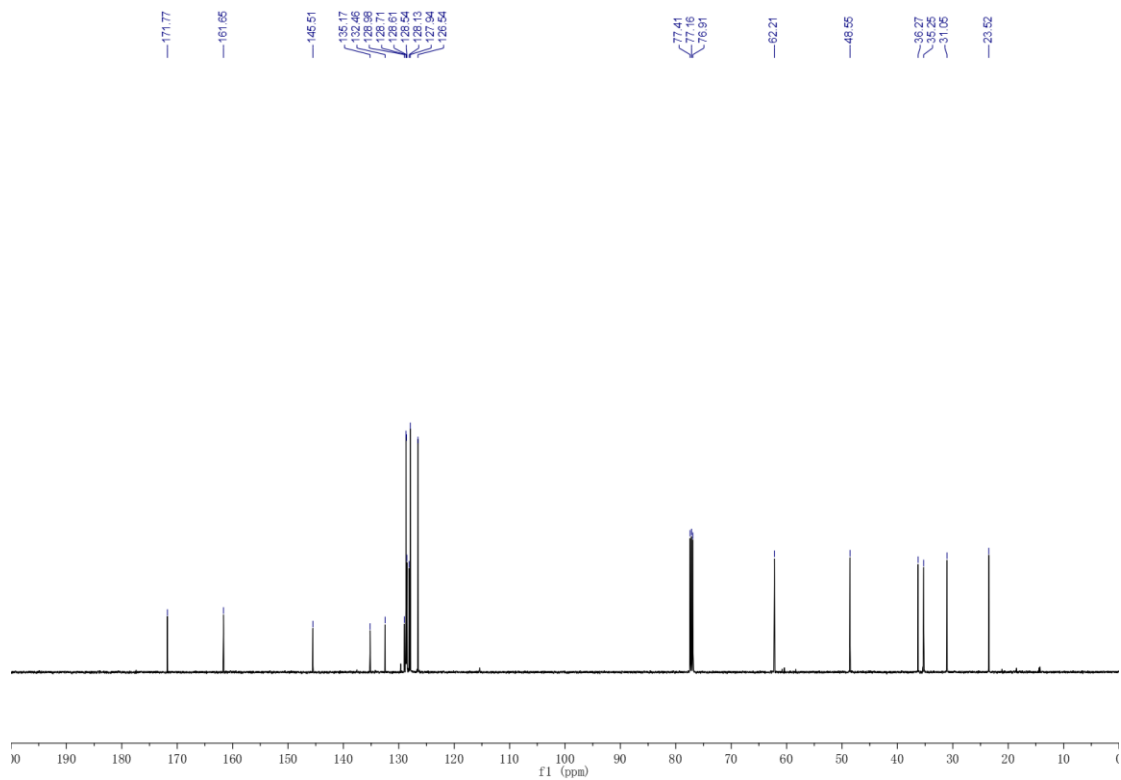

<sup>13</sup>C NMR of compound **118** (126 MHz, CDCl<sub>3</sub>)

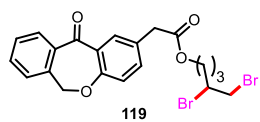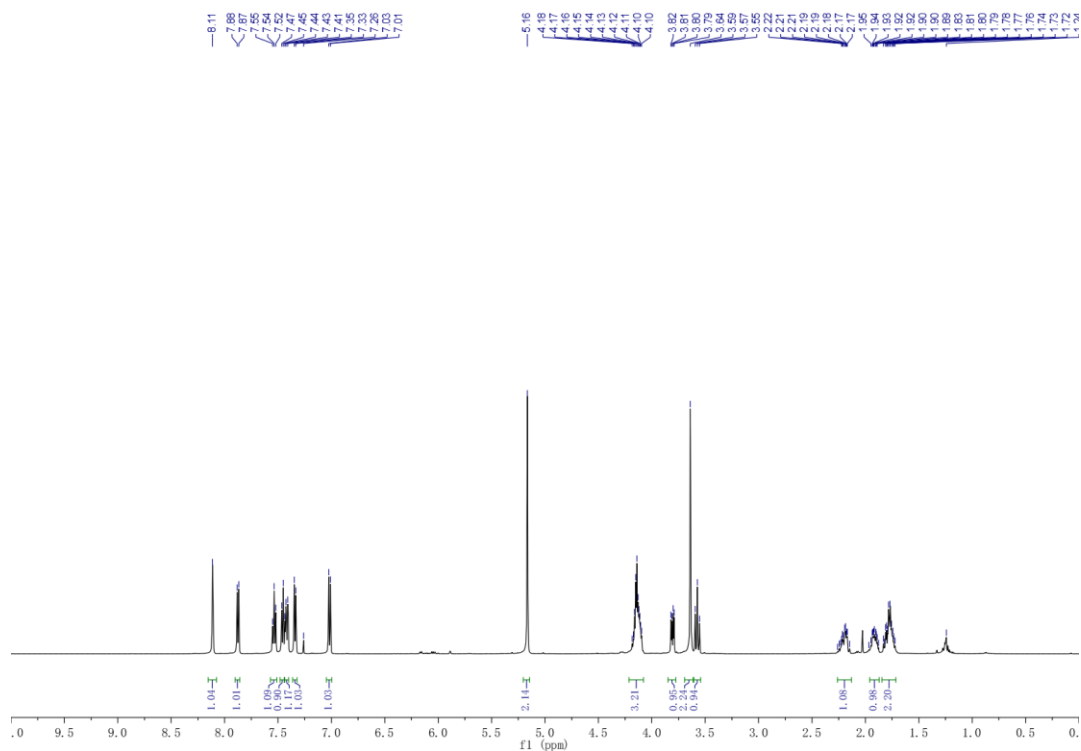

<sup>1</sup>H NMR of compound **119** (500 MHz, CDCl<sub>3</sub>)

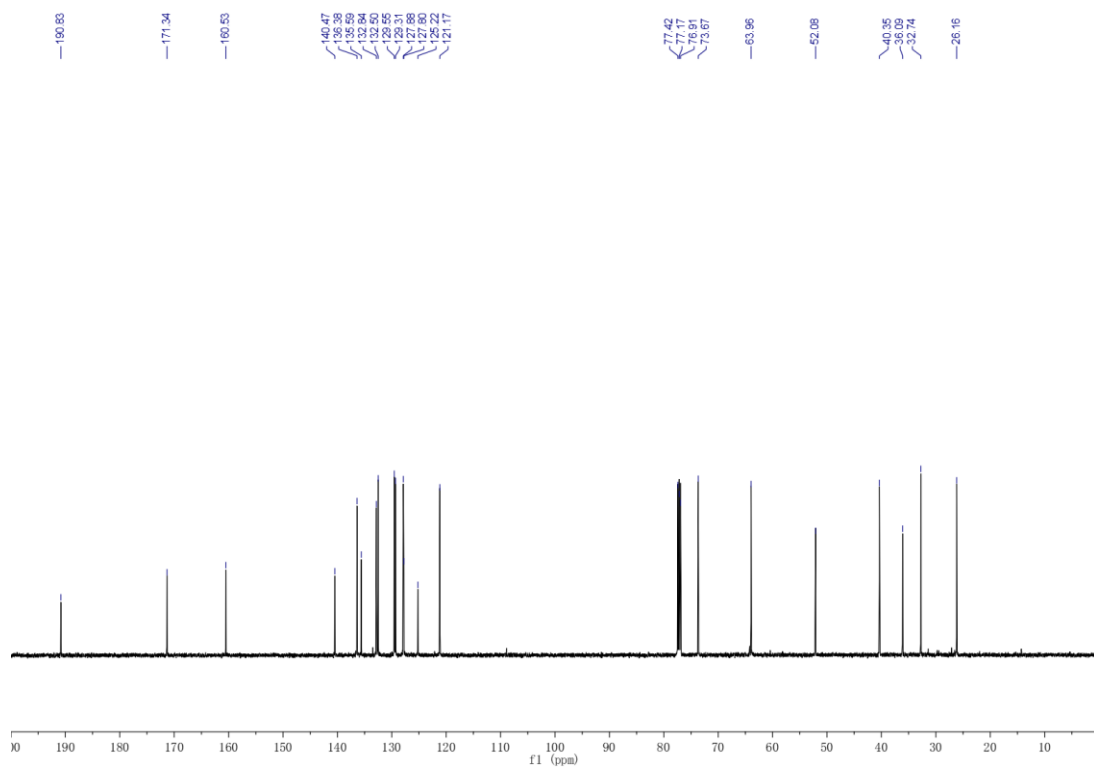

<sup>13</sup>C NMR of compound **119** (126 MHz, CDCl<sub>3</sub>)

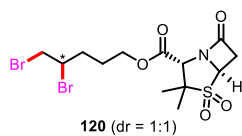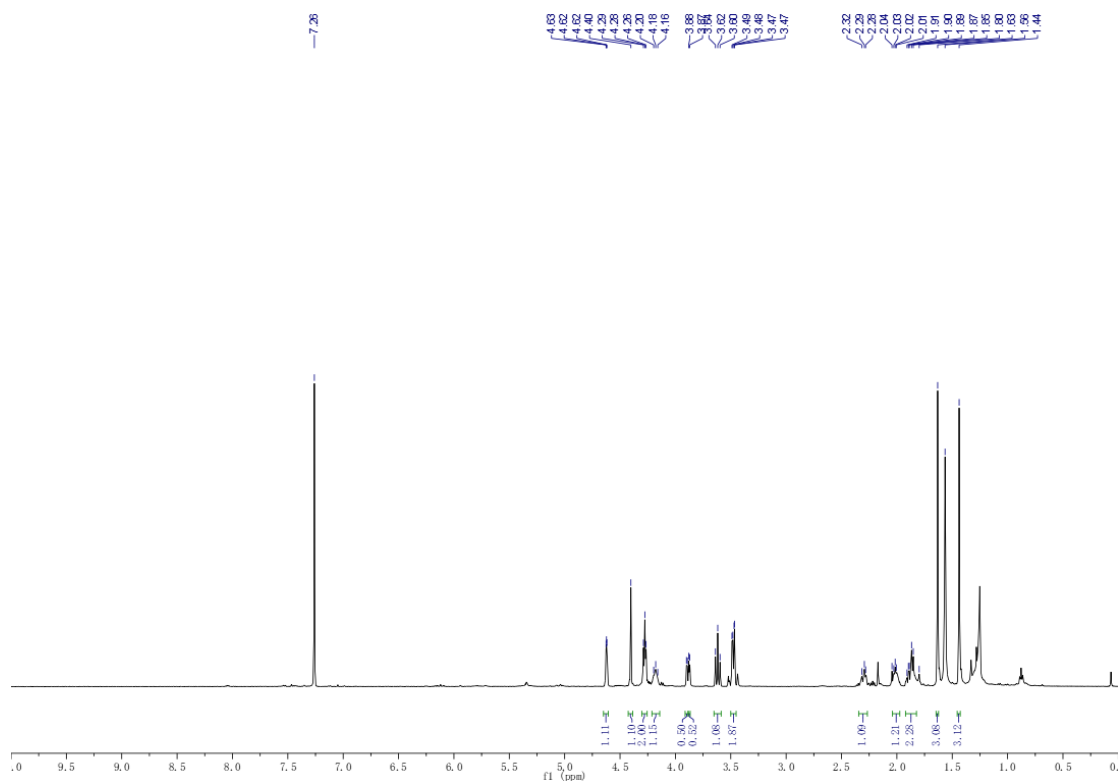

<sup>1</sup>H NMR of compound **120** (500 MHz, CDCl<sub>3</sub>)

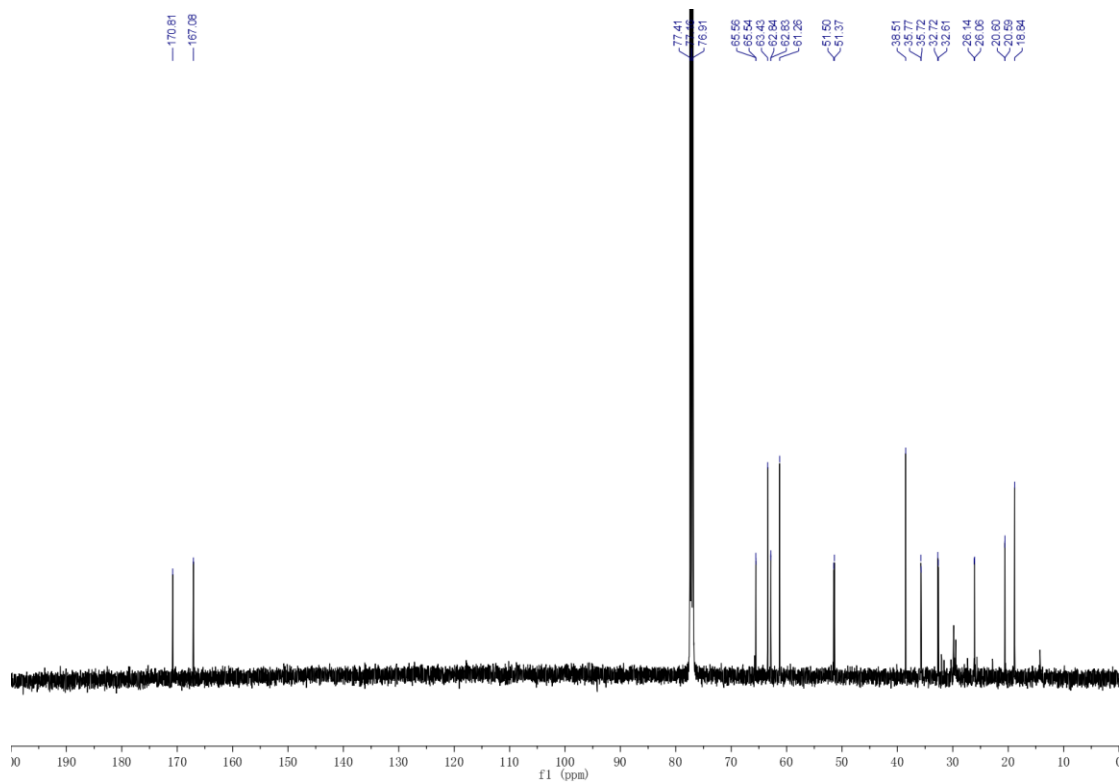

<sup>13</sup>C NMR of compound **120** (126 MHz, CDCl<sub>3</sub>)

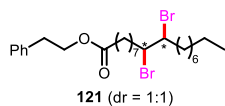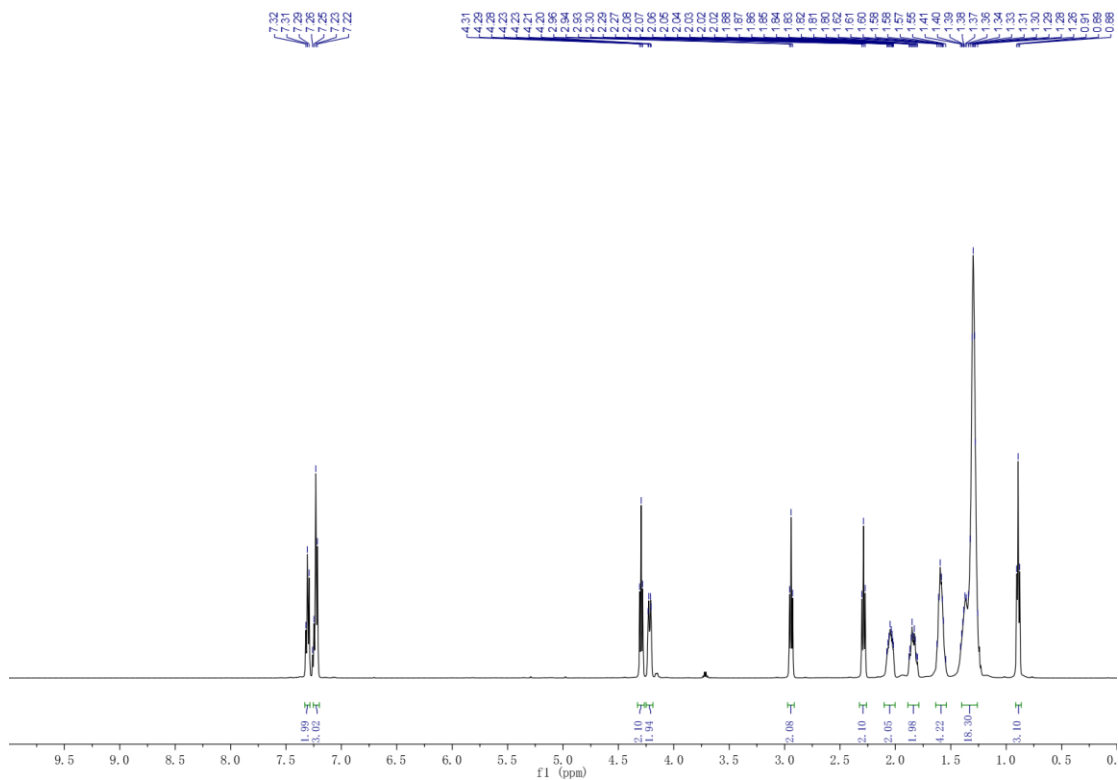

<sup>1</sup>H NMR of compound **121** (500 MHz, CDCl<sub>3</sub>)

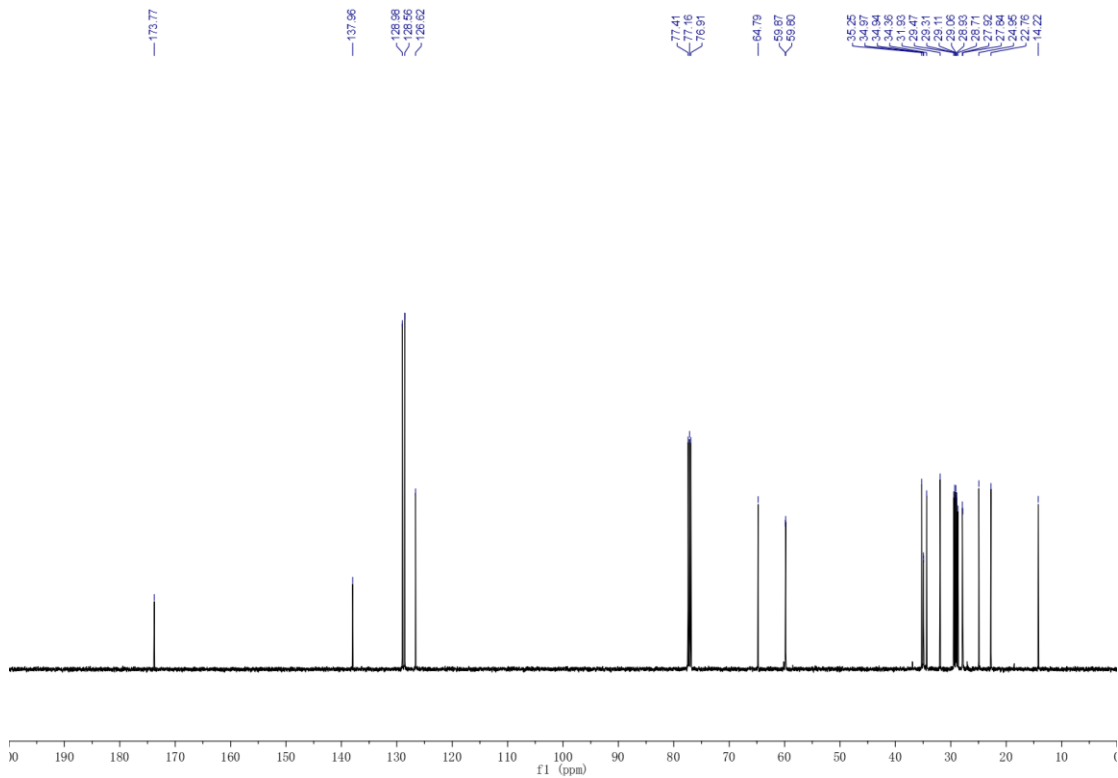

<sup>13</sup>C NMR of compound **121** (126 MHz, CDCl<sub>3</sub>)

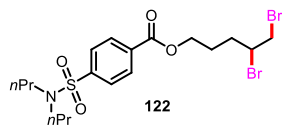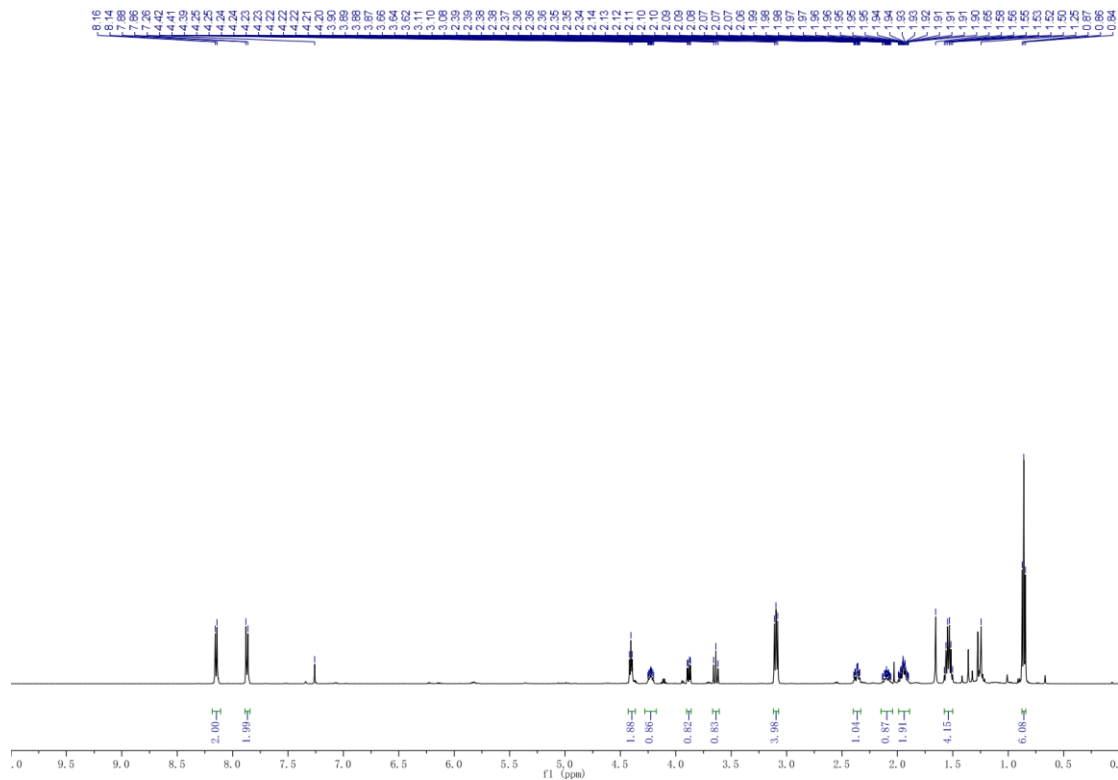

$^1\text{H}$  NMR of compound **122** (500 MHz,  $\text{CDCl}_3$ )

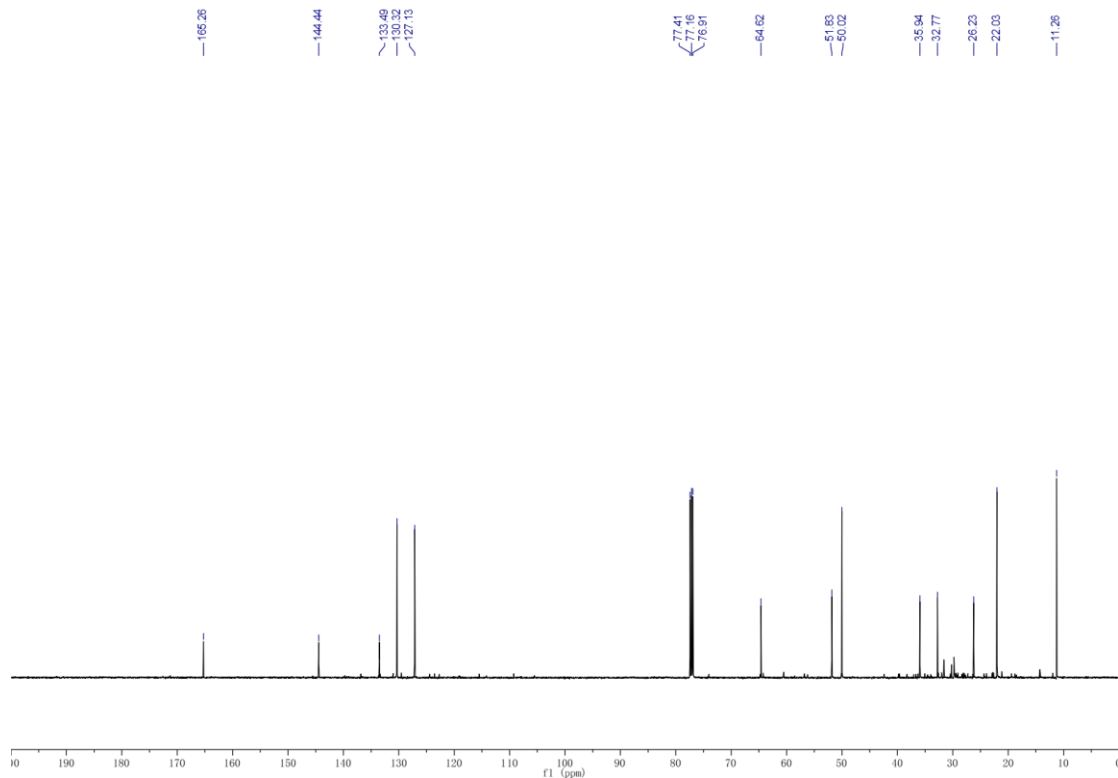

$^{13}\text{C}$  NMR of compound **122** (126 MHz,  $\text{CDCl}_3$ )



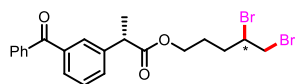

**123** (dr = 1:1)

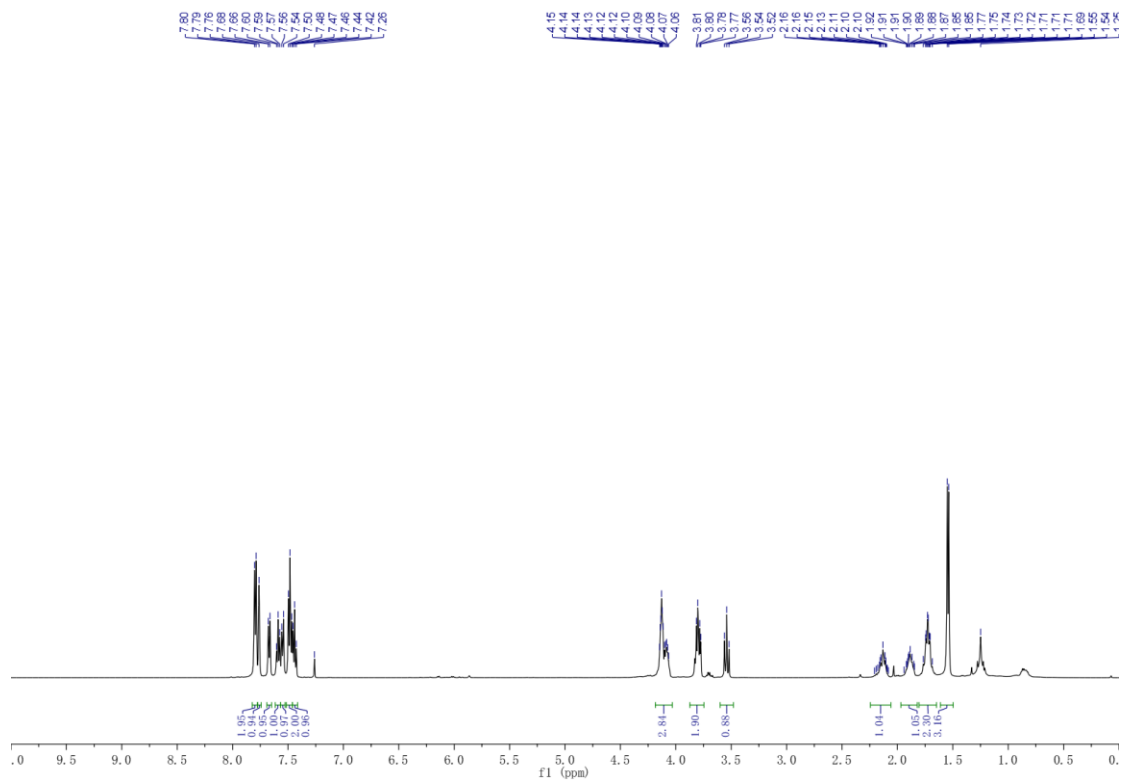

<sup>1</sup>H NMR of compound **123** (500 MHz, CDCl<sub>3</sub>)

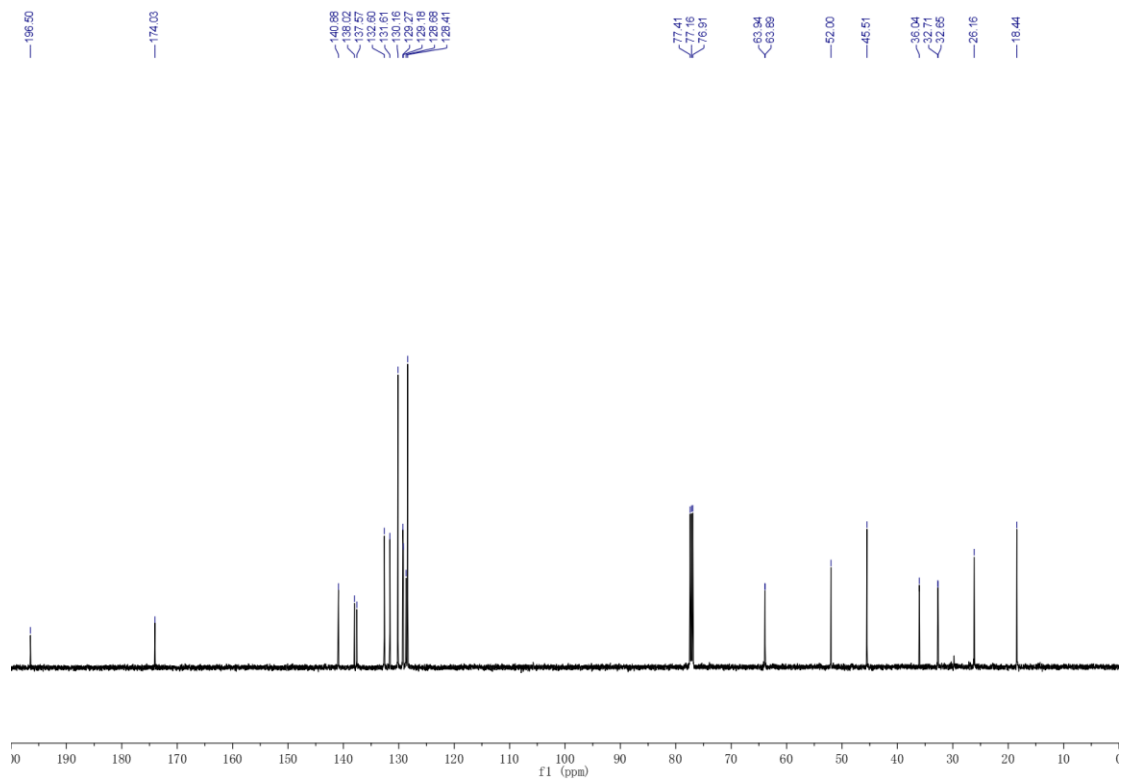

<sup>13</sup>C NMR of compound **123** (126 MHz, CDCl<sub>3</sub>)

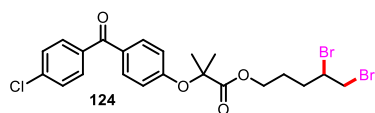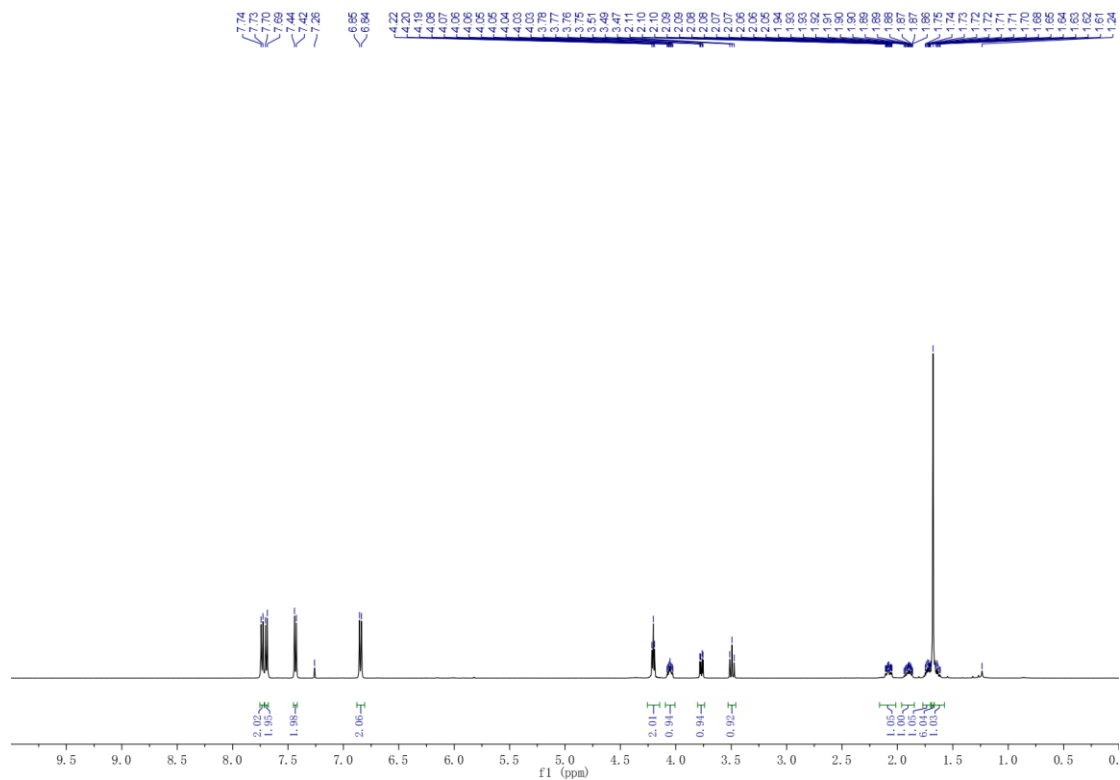

<sup>1</sup>H NMR of compound **124** (500 MHz, CDCl<sub>3</sub>)

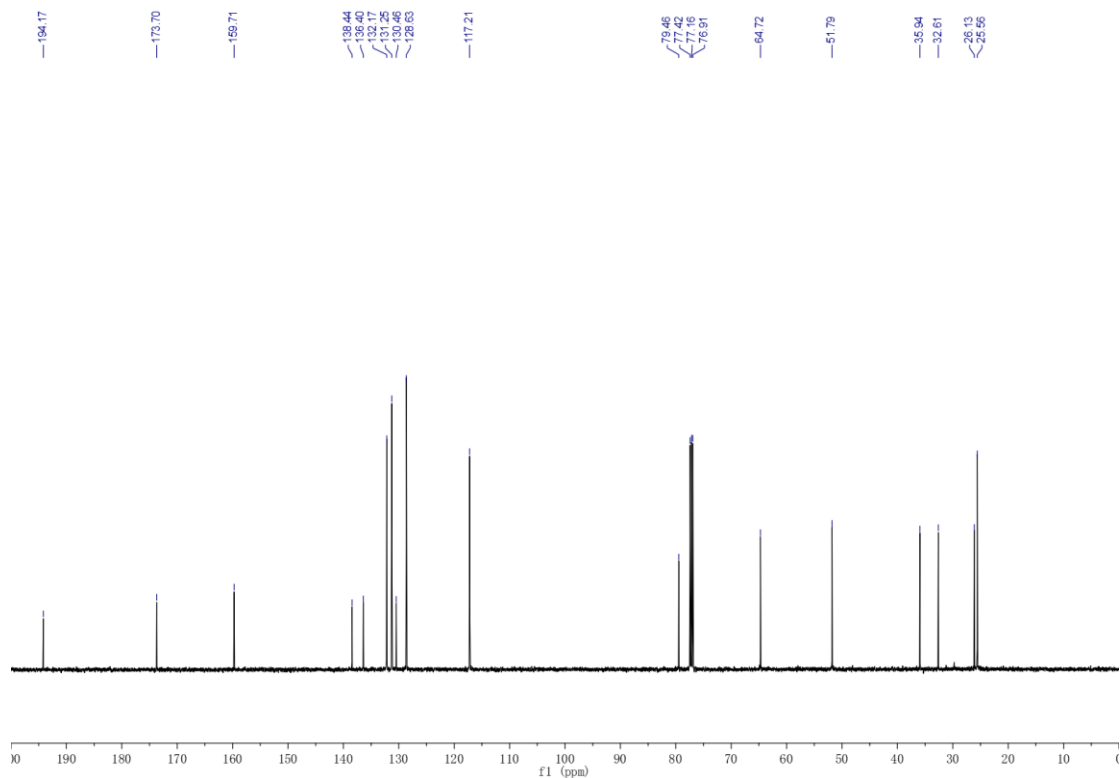

<sup>13</sup>C NMR of compound **124** (126 MHz, CDCl<sub>3</sub>)

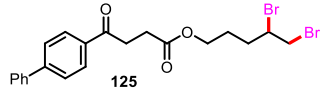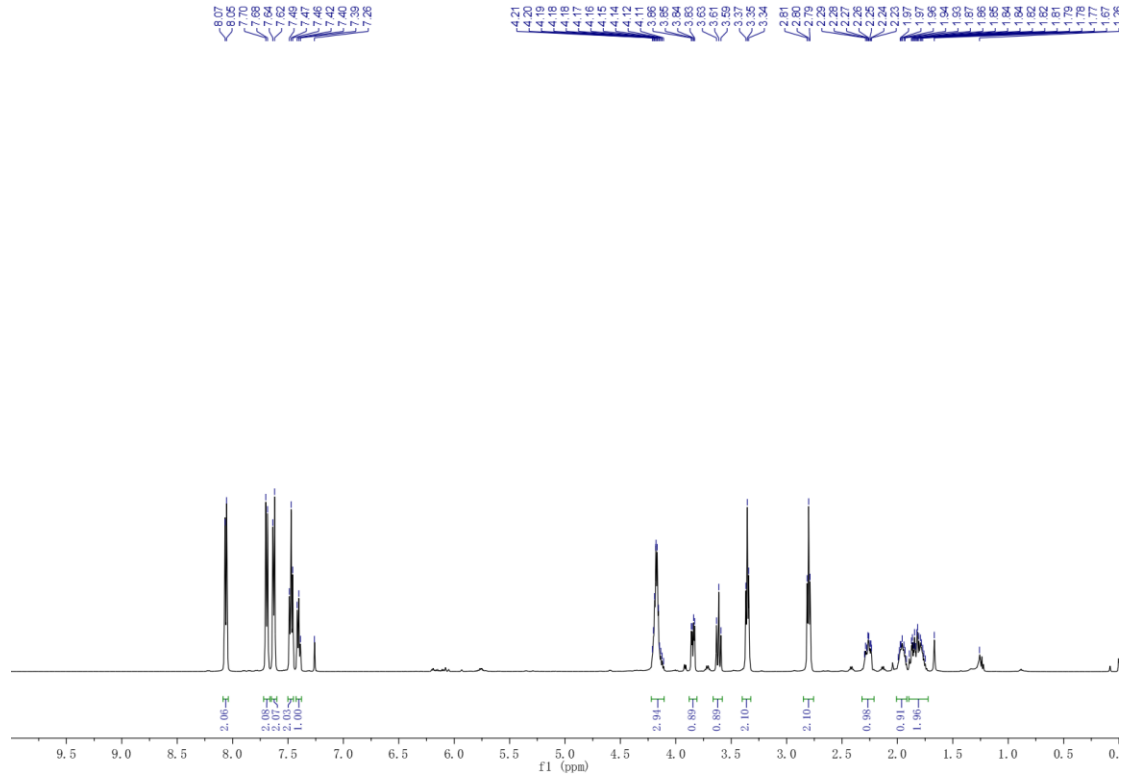

<sup>1</sup>H NMR of compound **125** (500 MHz, CDCl<sub>3</sub>)

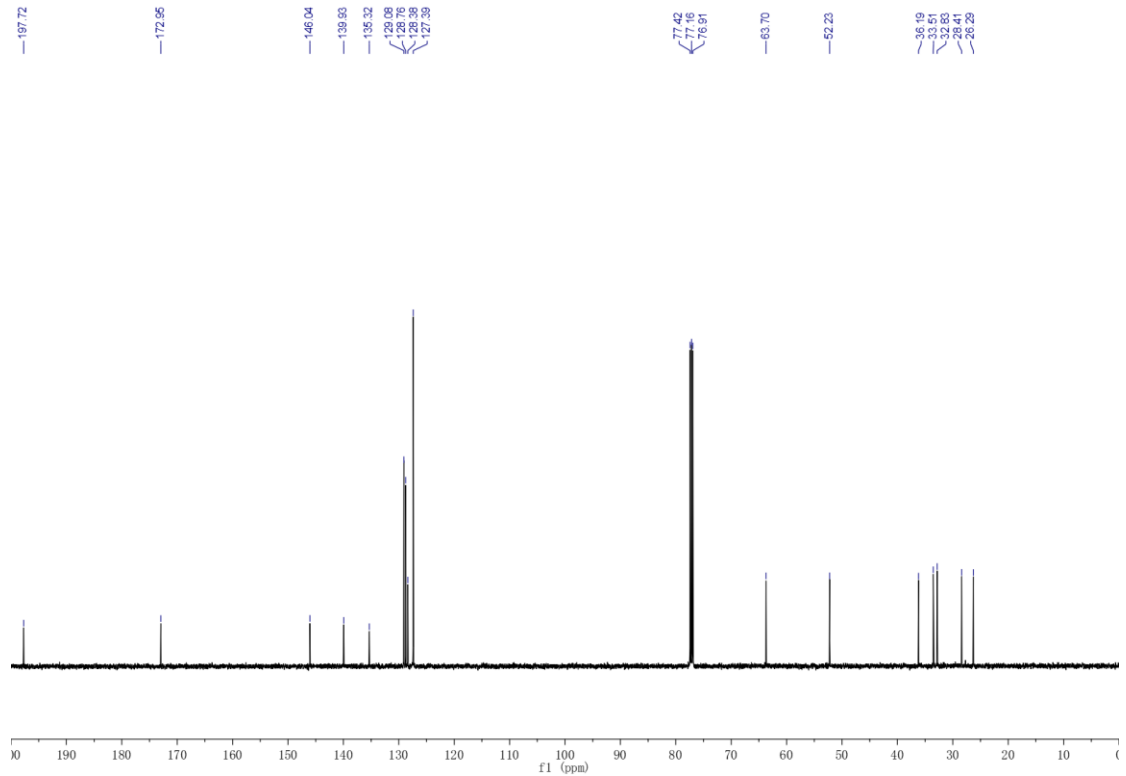

<sup>13</sup>C NMR of compound **125** (126 MHz, CDCl<sub>3</sub>)

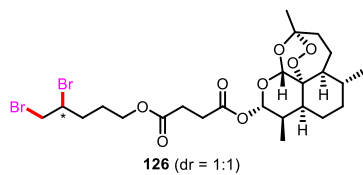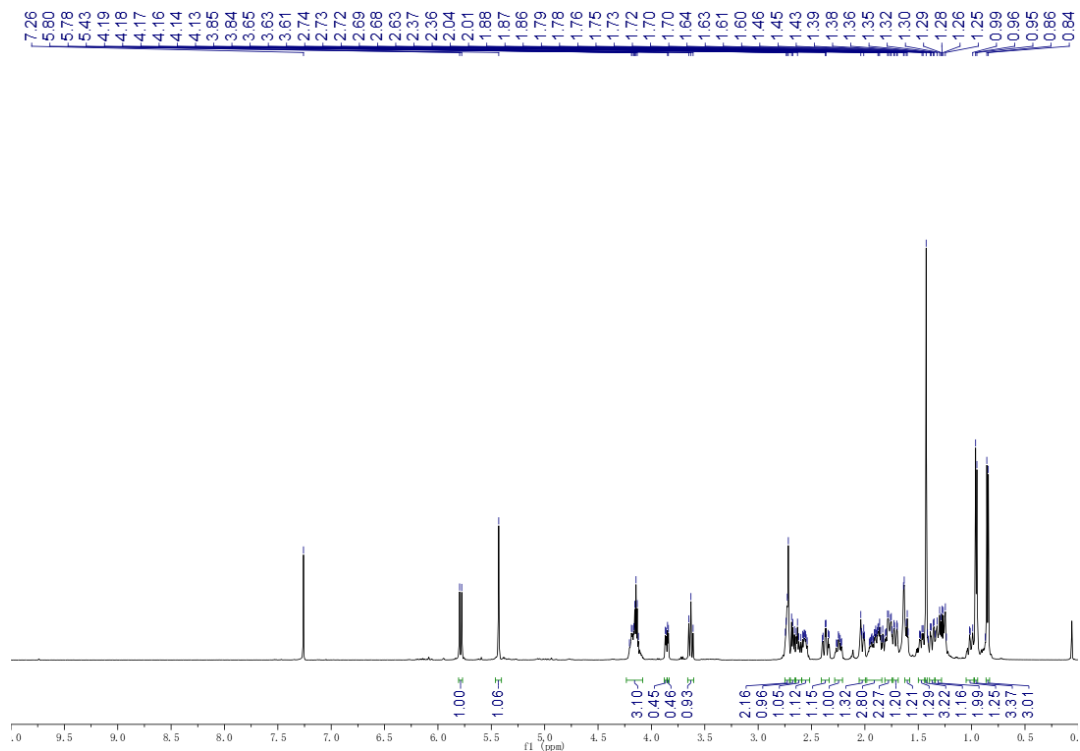

<sup>1</sup>H NMR of compound **126** (500 MHz, CDCl<sub>3</sub>)

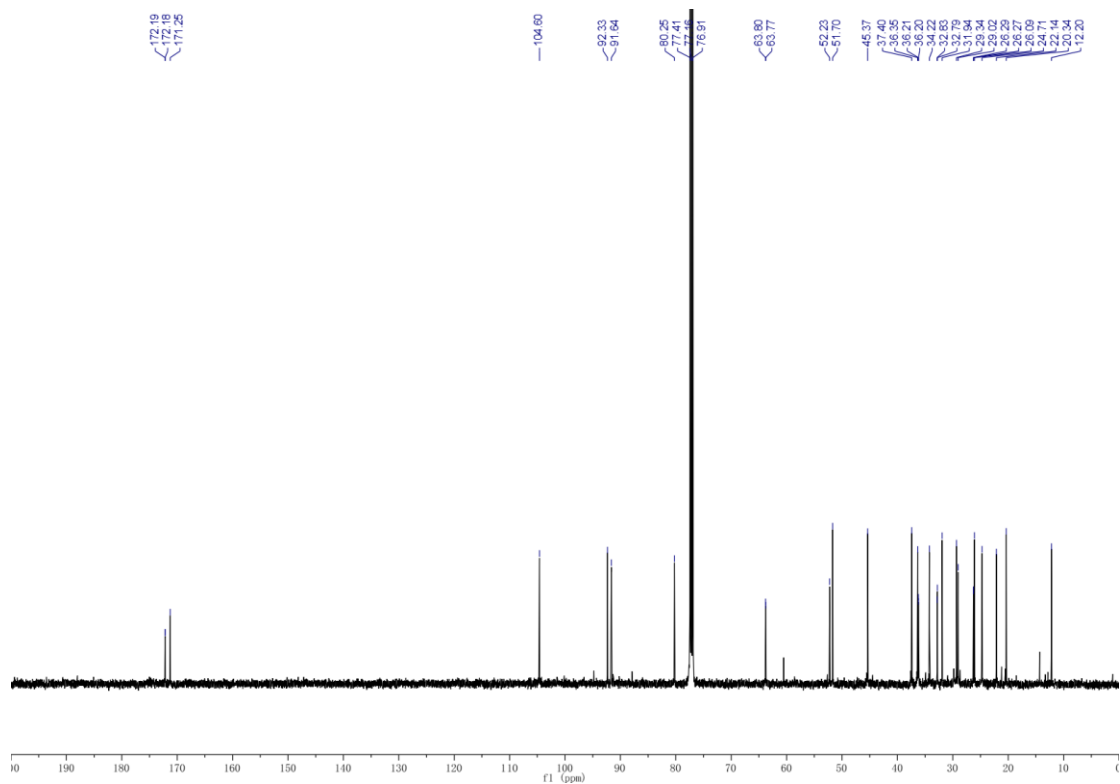

<sup>13</sup>C NMR of compound **126** (126 MHz, CDCl<sub>3</sub>)

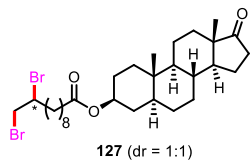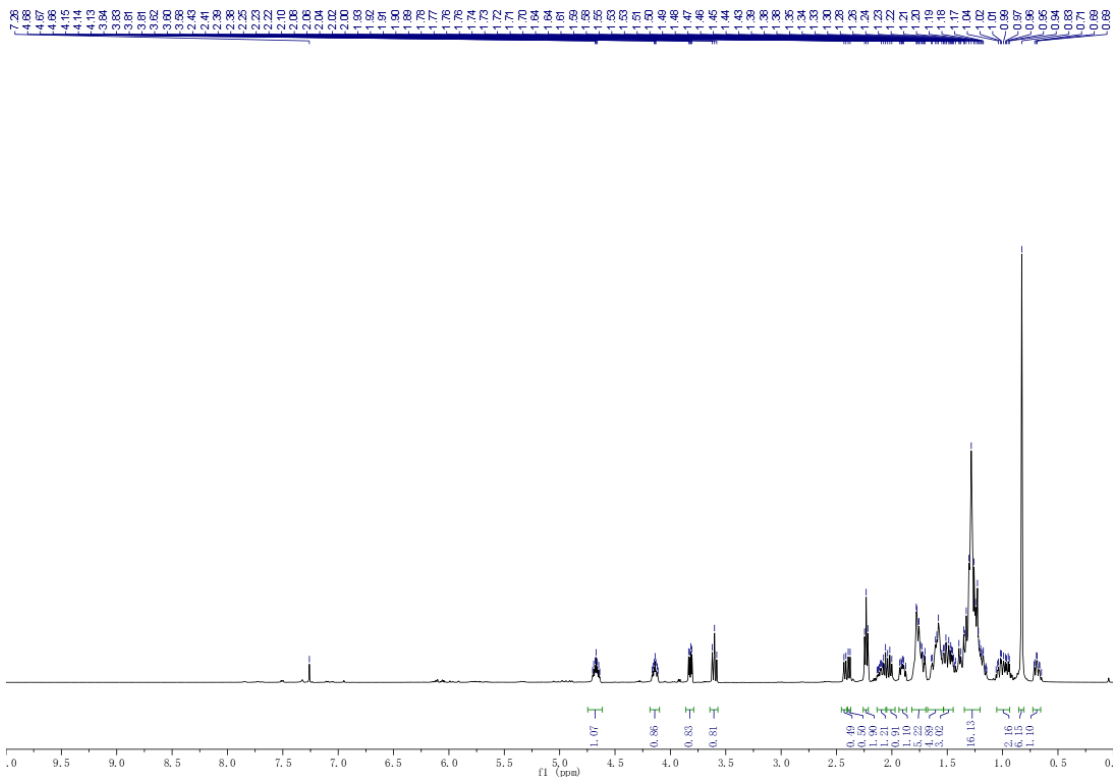

<sup>1</sup>H NMR of compound **127** (500 MHz, CDCl<sub>3</sub>)

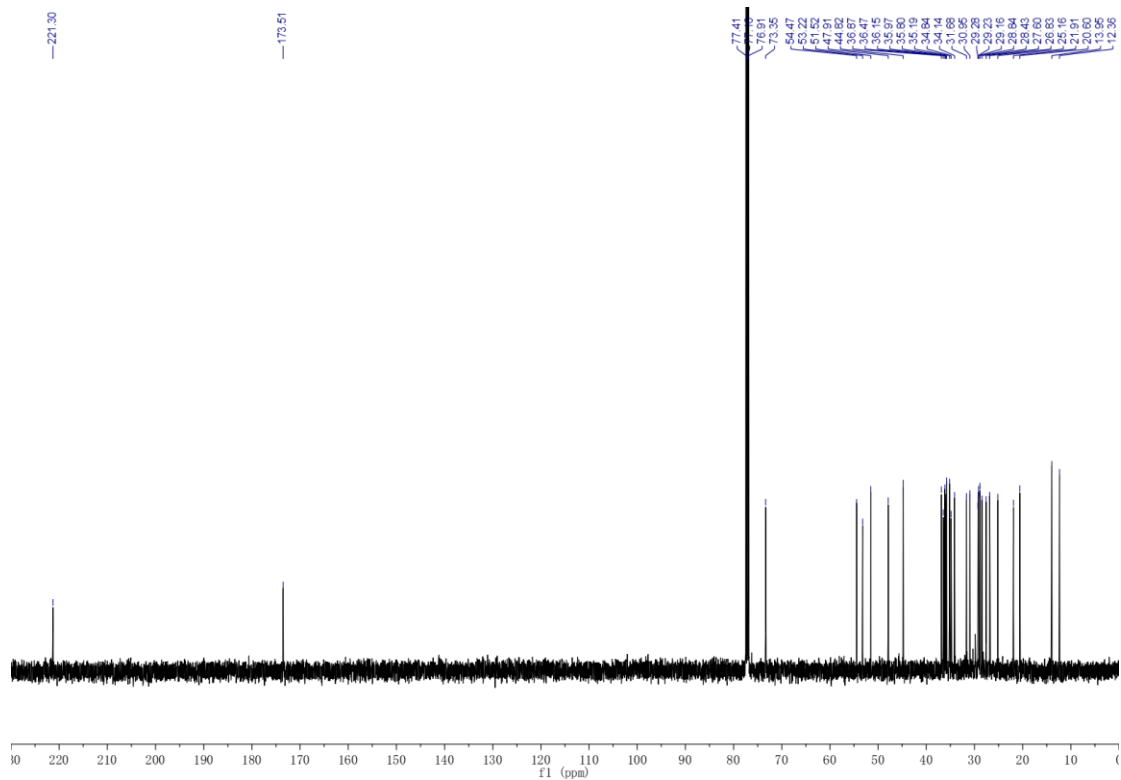

<sup>13</sup>C NMR of compound **127** (126 MHz, CDCl<sub>3</sub>)

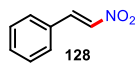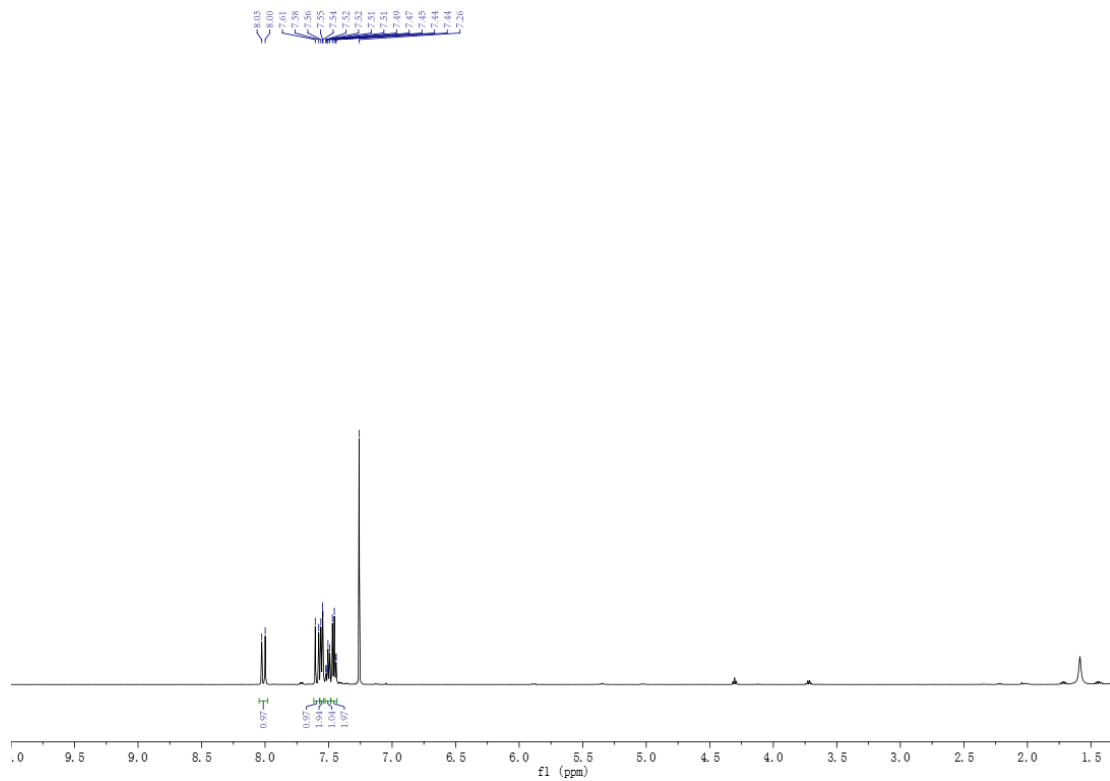

<sup>1</sup>H NMR of compound **128** (500 MHz, CDCl<sub>3</sub>)

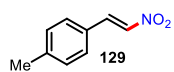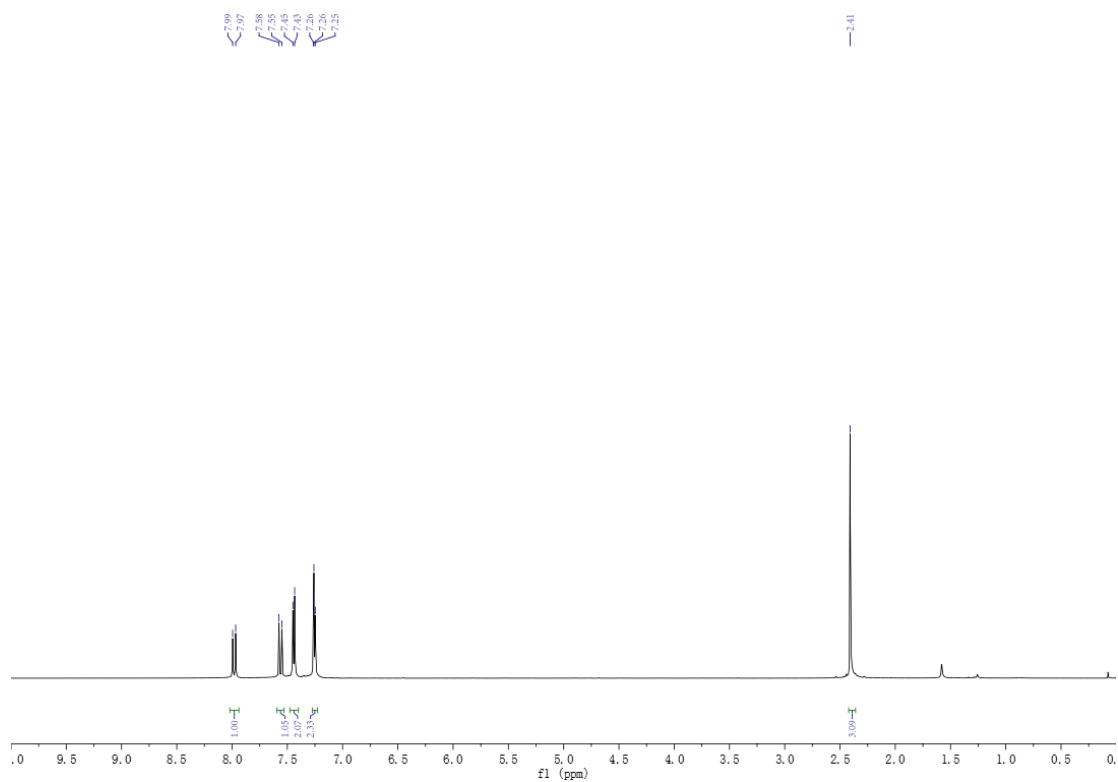

<sup>1</sup>H NMR of compound **129** (500 MHz, CDCl<sub>3</sub>)

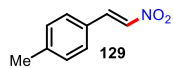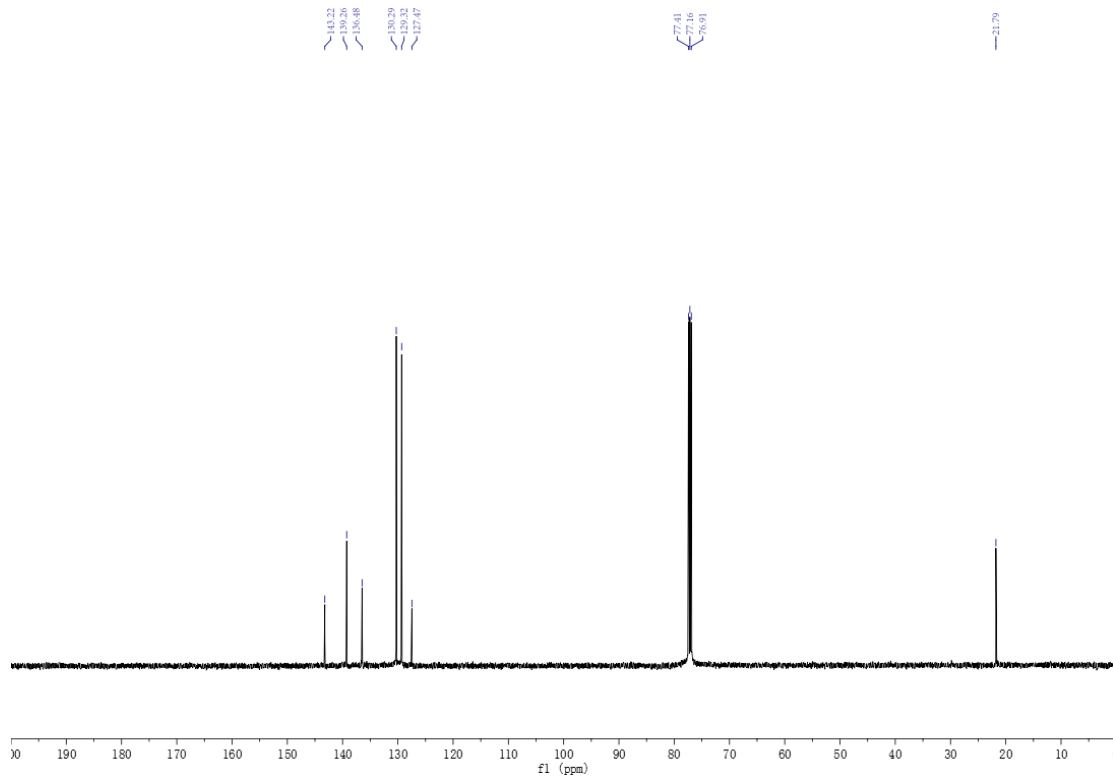

$^{13}\text{C}$  NMR of compound **129** (126 MHz,  $\text{CDCl}_3$ )

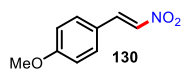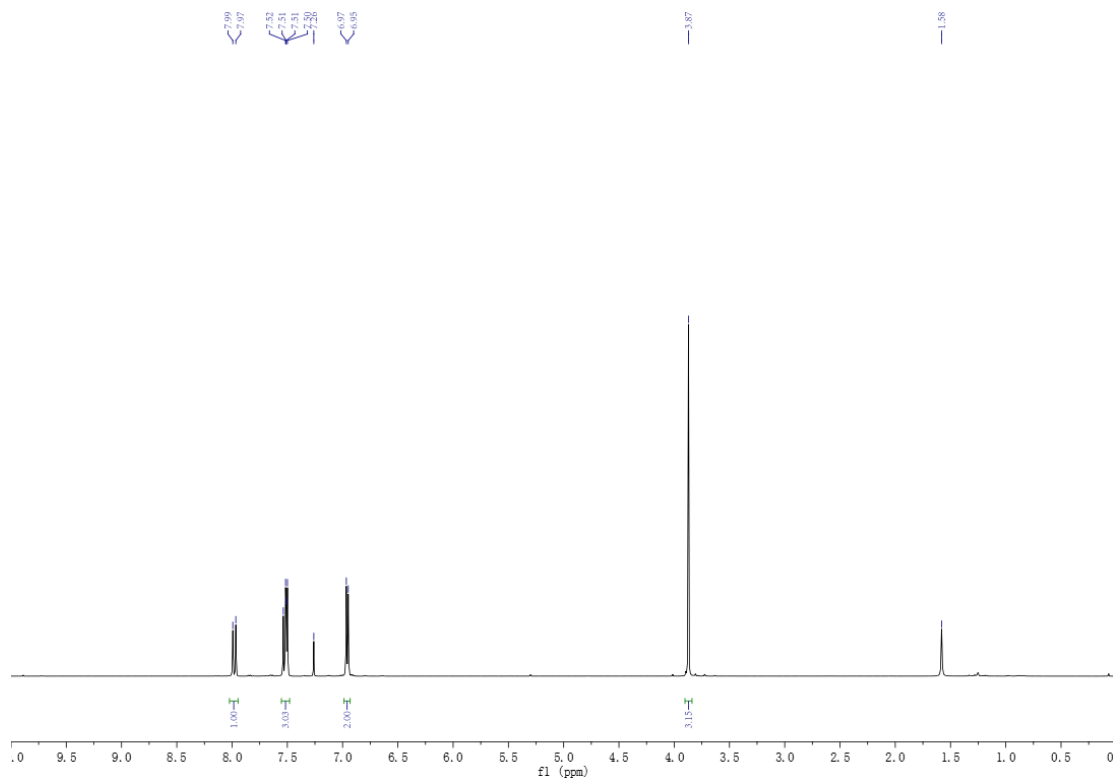

$^1\text{H}$  NMR of compound **130** (500 MHz,  $\text{CDCl}_3$ )

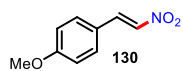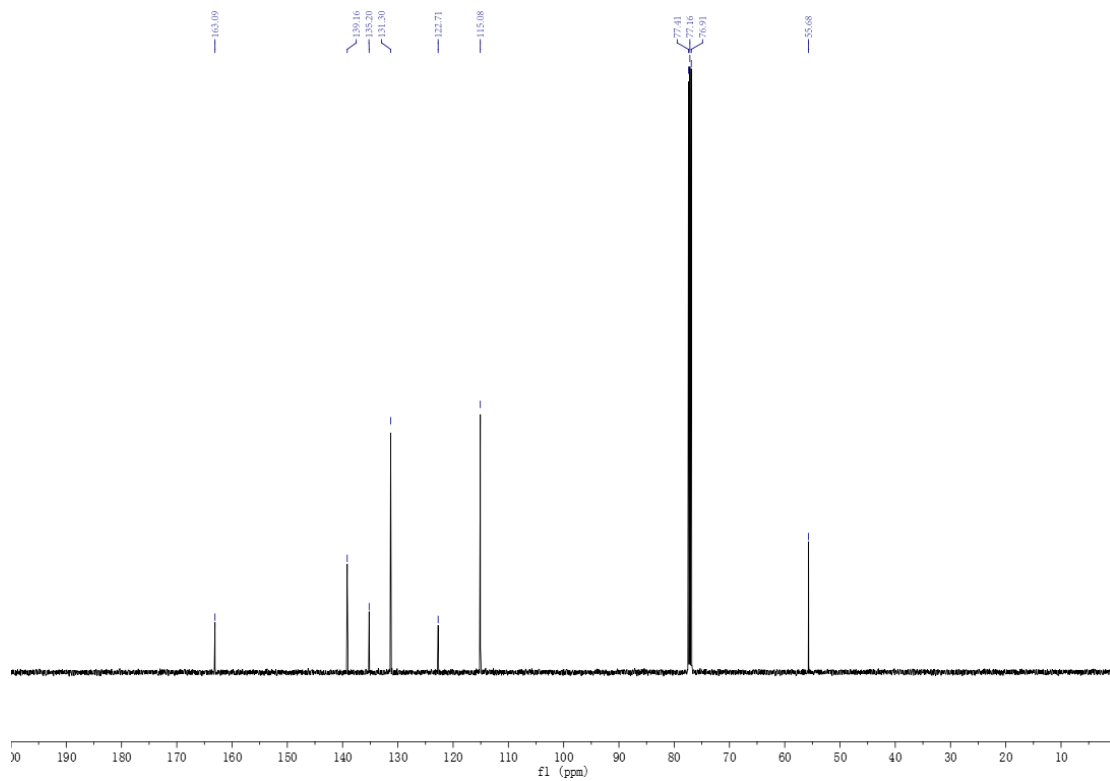

$^{13}\text{C}$  NMR of compound **130** (126 MHz,  $\text{CDCl}_3$ )

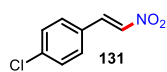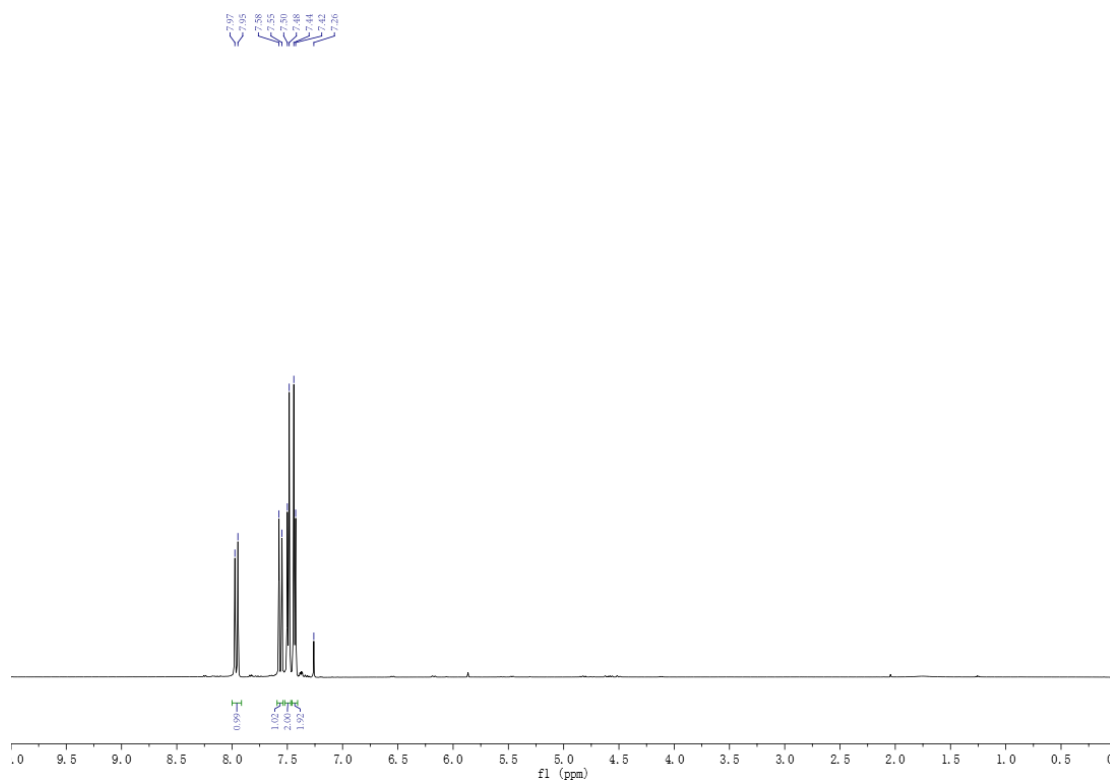

$^1\text{H}$  NMR of compound **131** (500 MHz,  $\text{CDCl}_3$ )



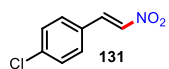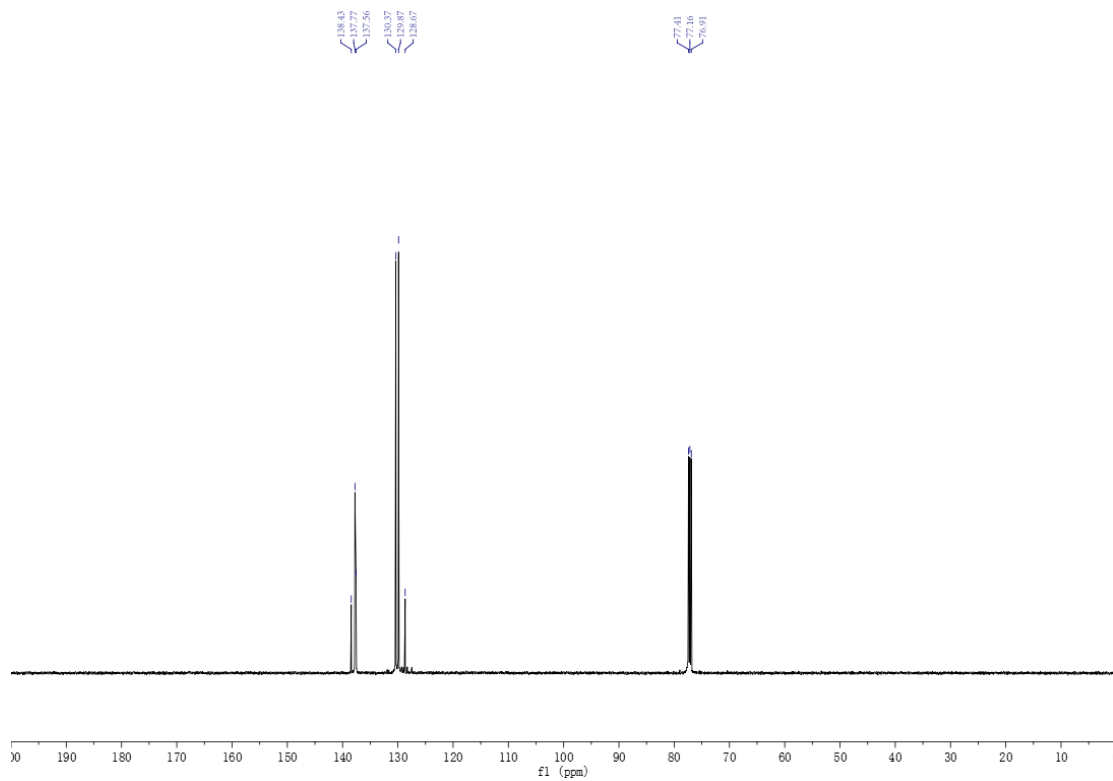

<sup>13</sup>C NMR of compound **131** (126 MHz, CDCl<sub>3</sub>)

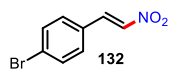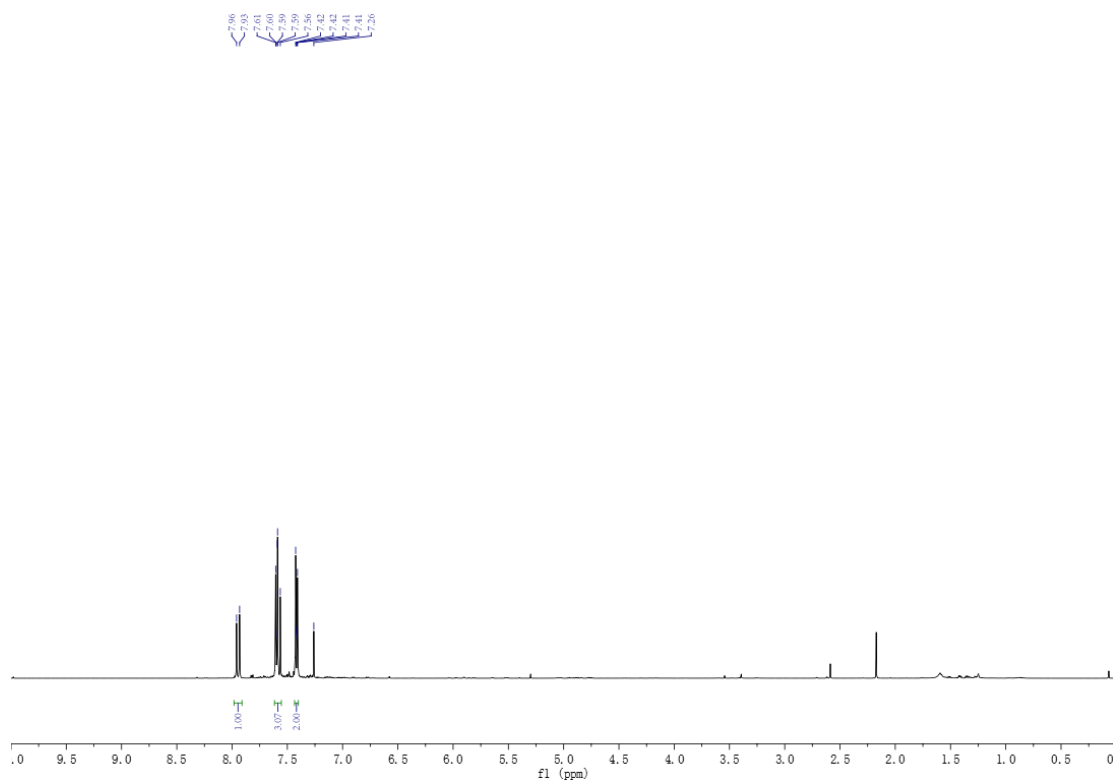

<sup>1</sup>H NMR of compound **132** (500 MHz, CDCl<sub>3</sub>)

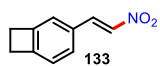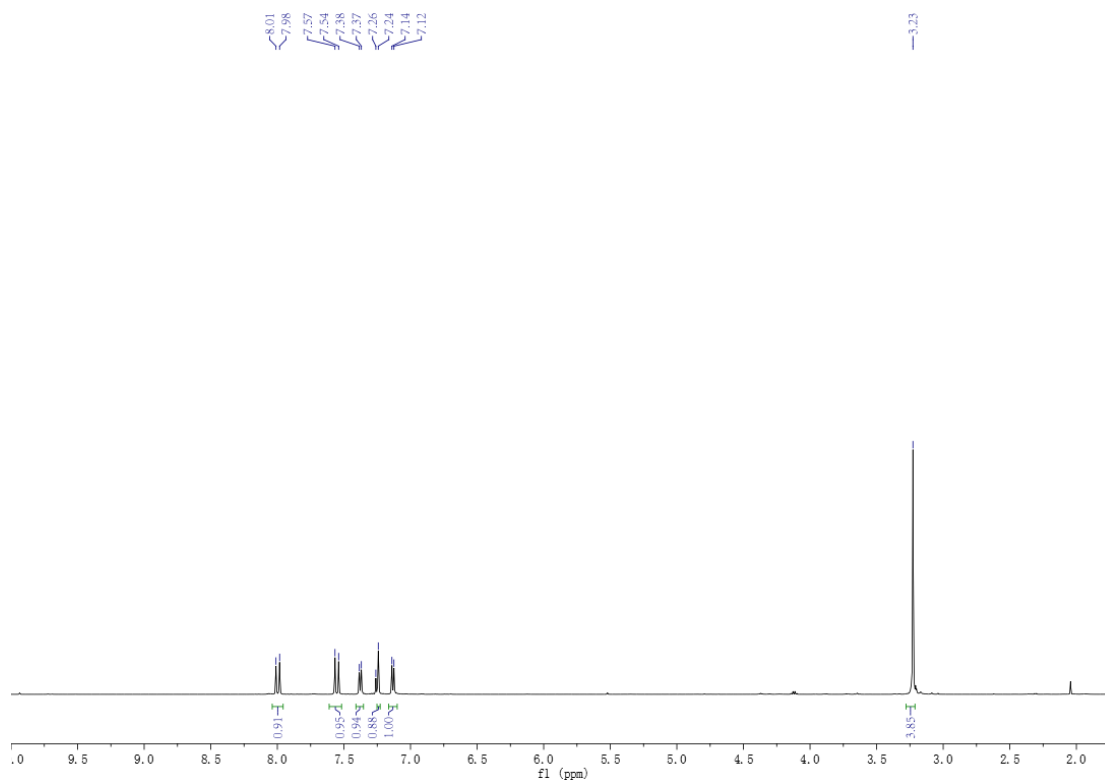

$^1\text{H}$  NMR of compound **133** (500 MHz,  $\text{CDCl}_3$ )

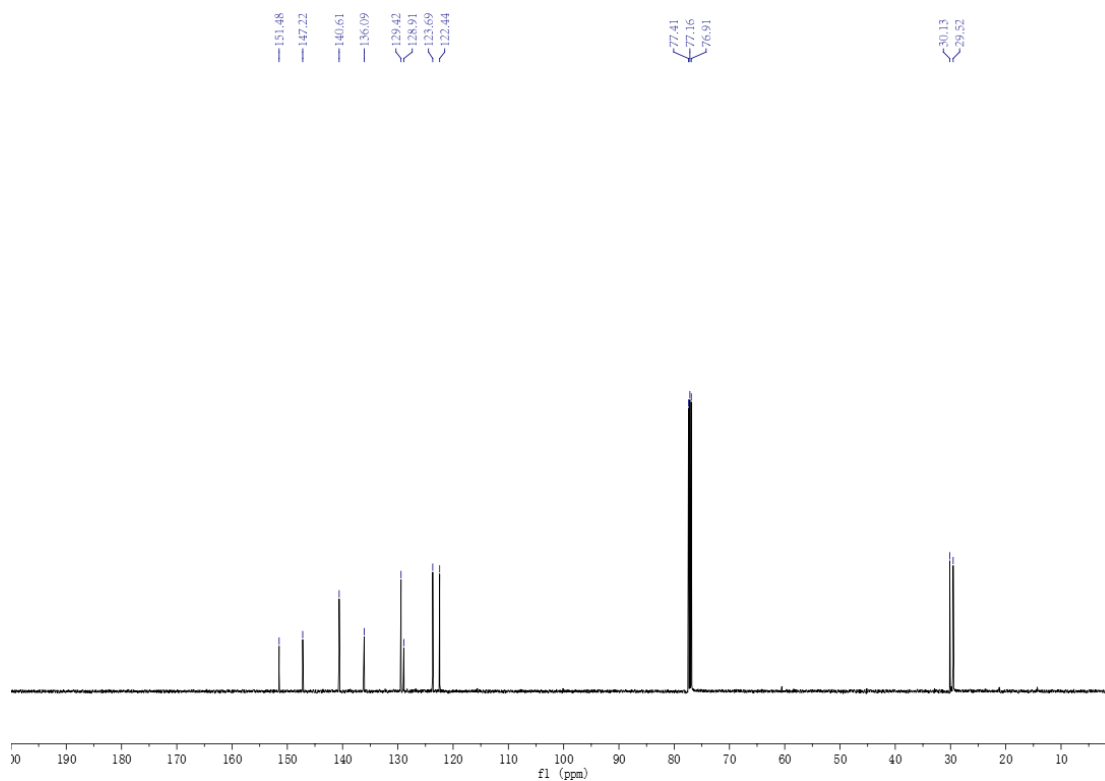

$^{13}\text{C}$  NMR of compound **133** (126 MHz,  $\text{CDCl}_3$ )

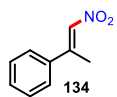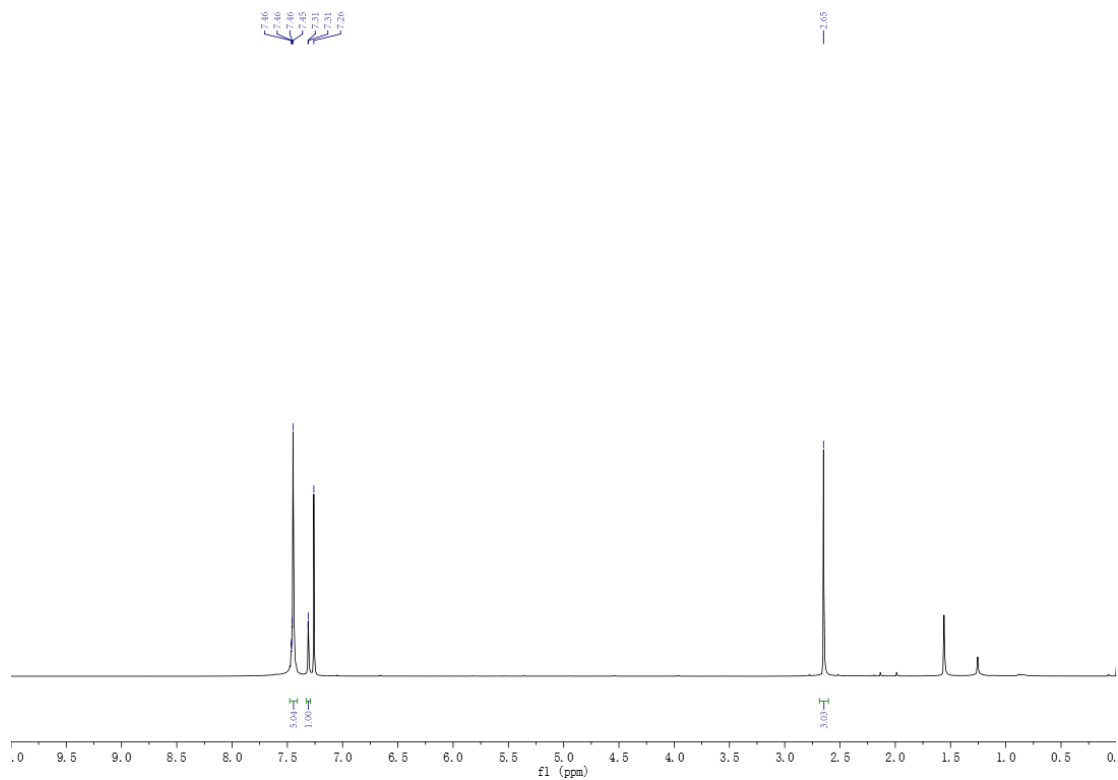

<sup>1</sup>H NMR of compound **134** (500 MHz, CDCl<sub>3</sub>)

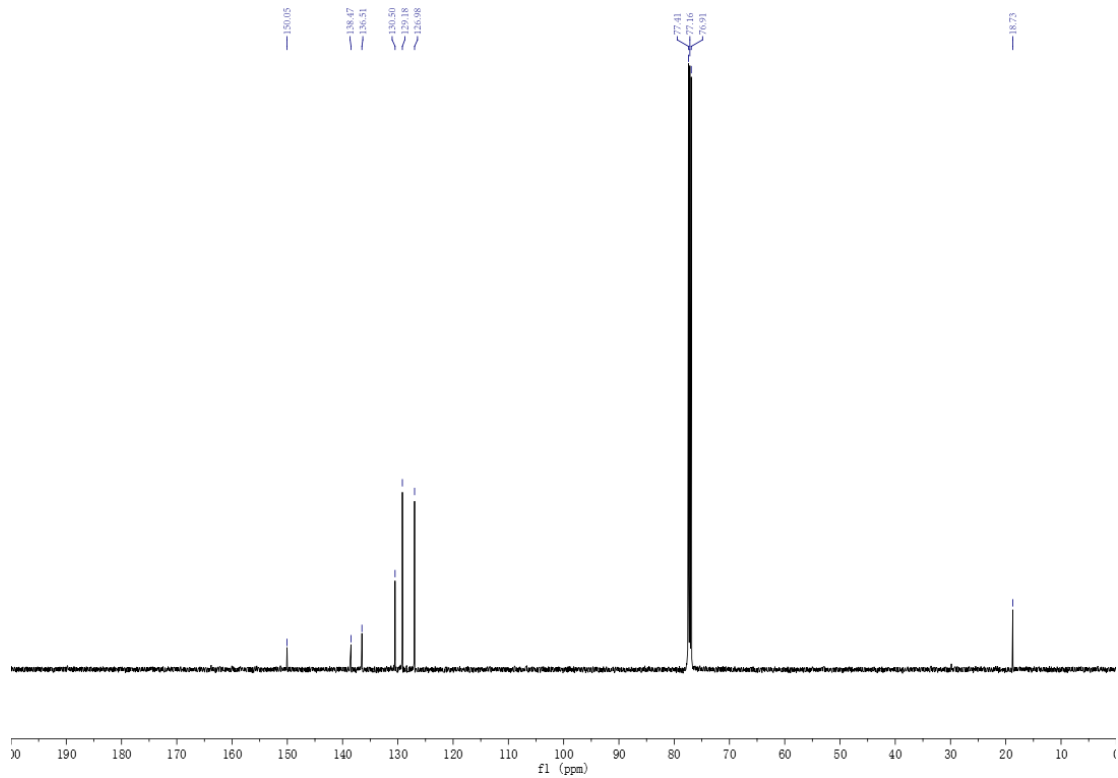

<sup>13</sup>C NMR of compound **134** (126 MHz, CDCl<sub>3</sub>)

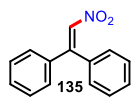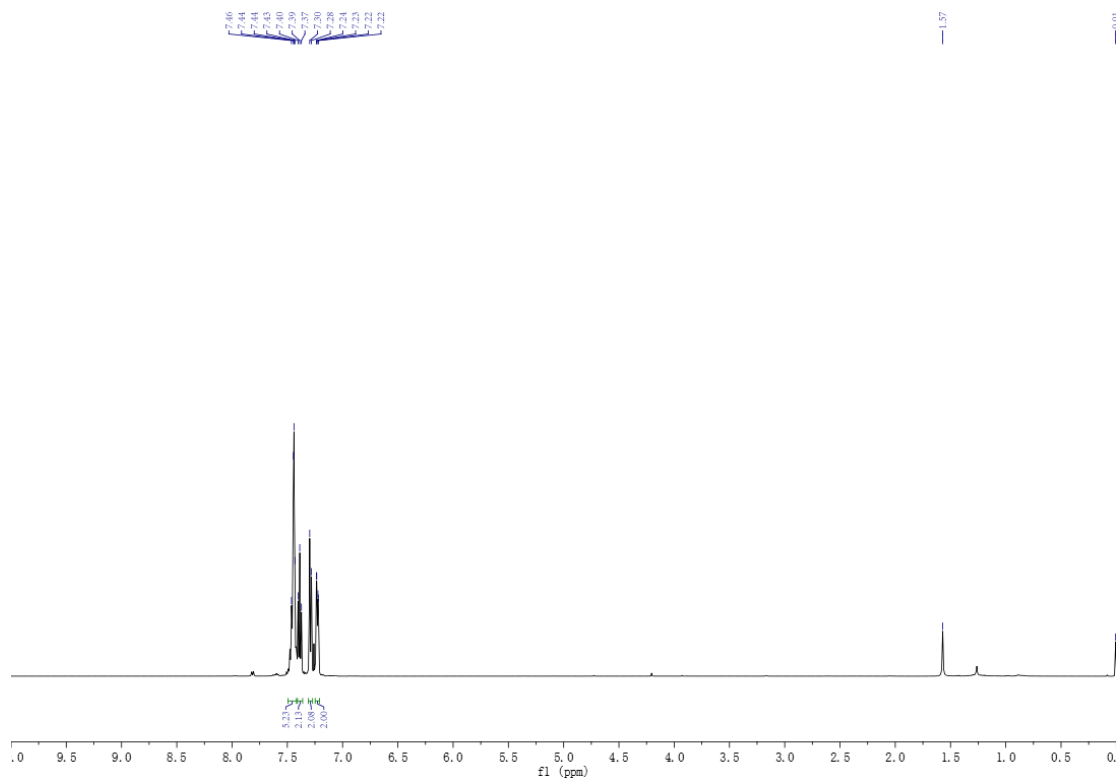

<sup>1</sup>H NMR of compound **135** (500 MHz, CDCl<sub>3</sub>)

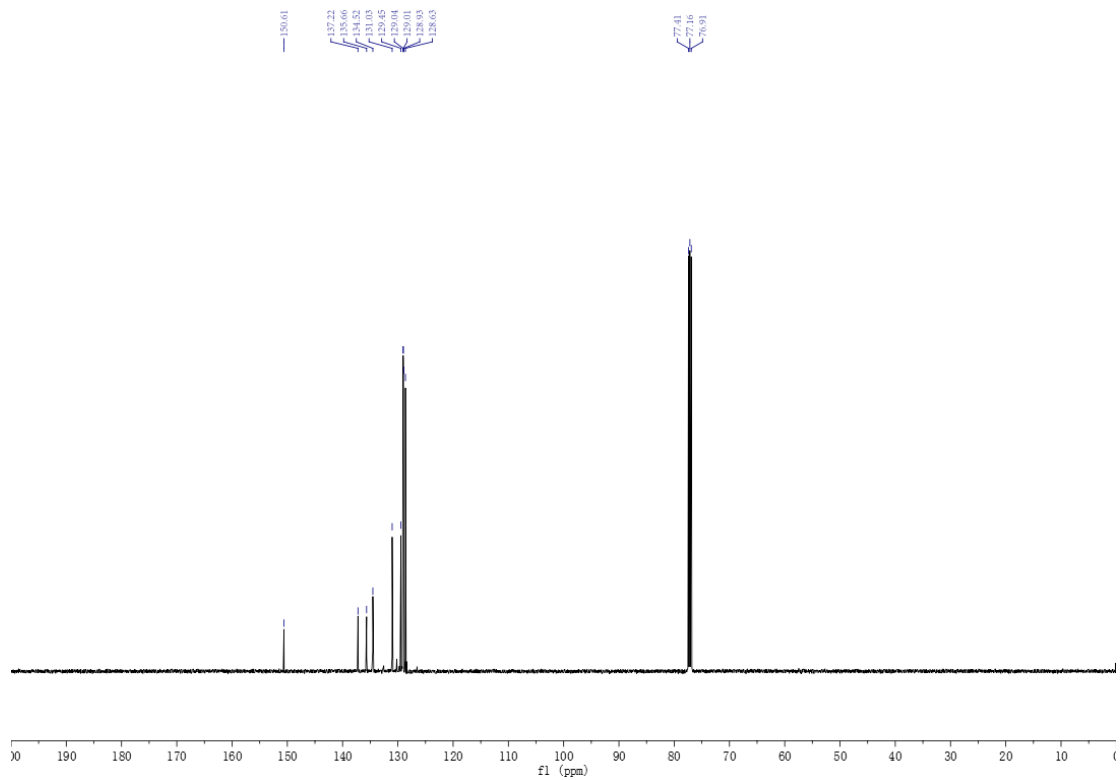

<sup>13</sup>C NMR of compound **135** (126 MHz, CDCl<sub>3</sub>)

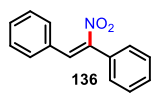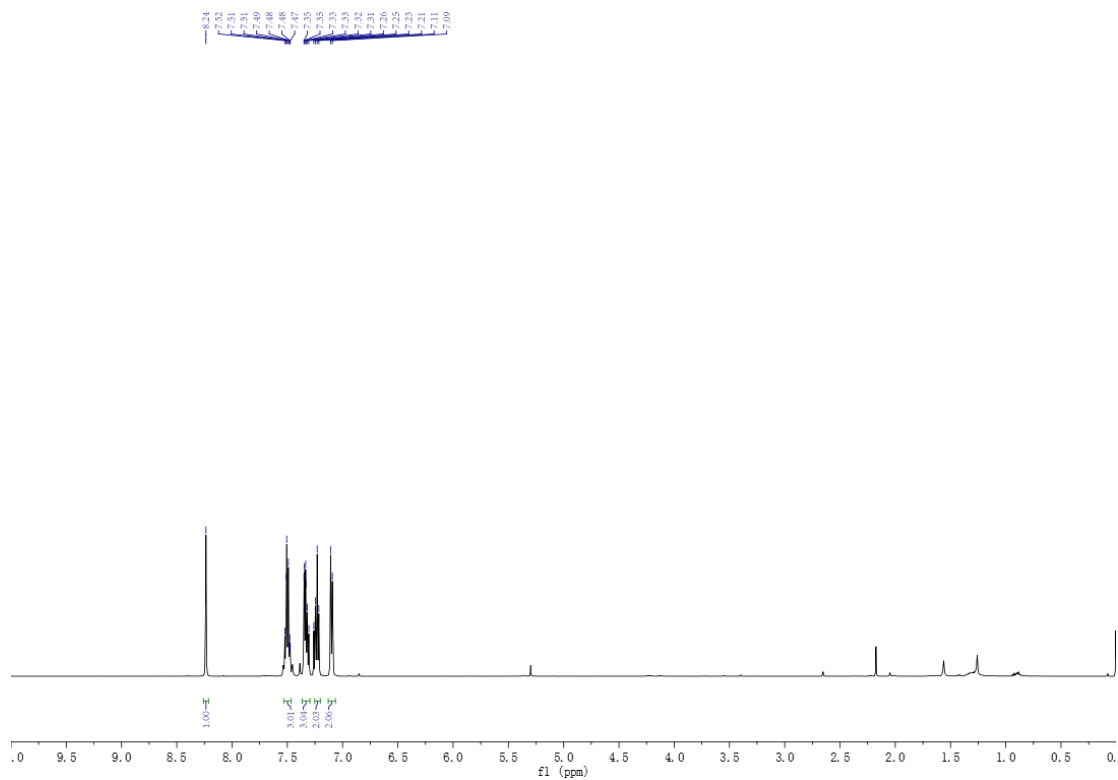

<sup>1</sup>H NMR of compound **136** (500 MHz, CDCl<sub>3</sub>)

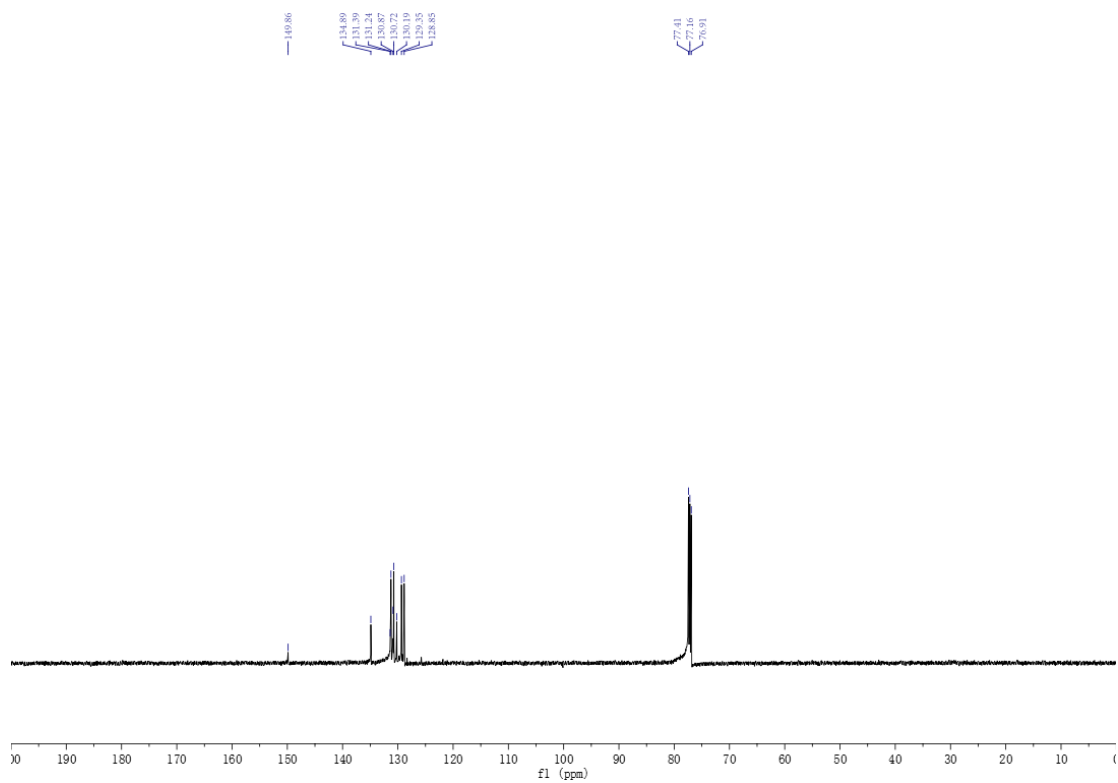

<sup>13</sup>C NMR of compound **136** (126 MHz, CDCl<sub>3</sub>)

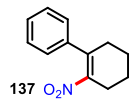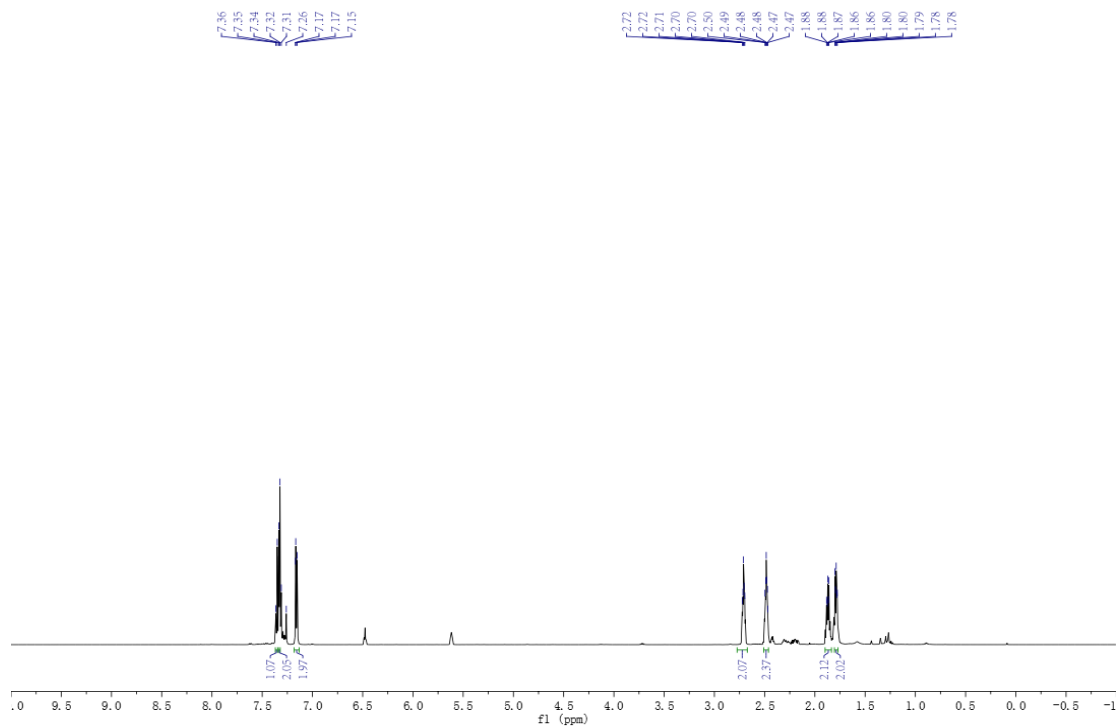

<sup>1</sup>H NMR of compound 137 (500 MHz, CDCl<sub>3</sub>)

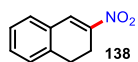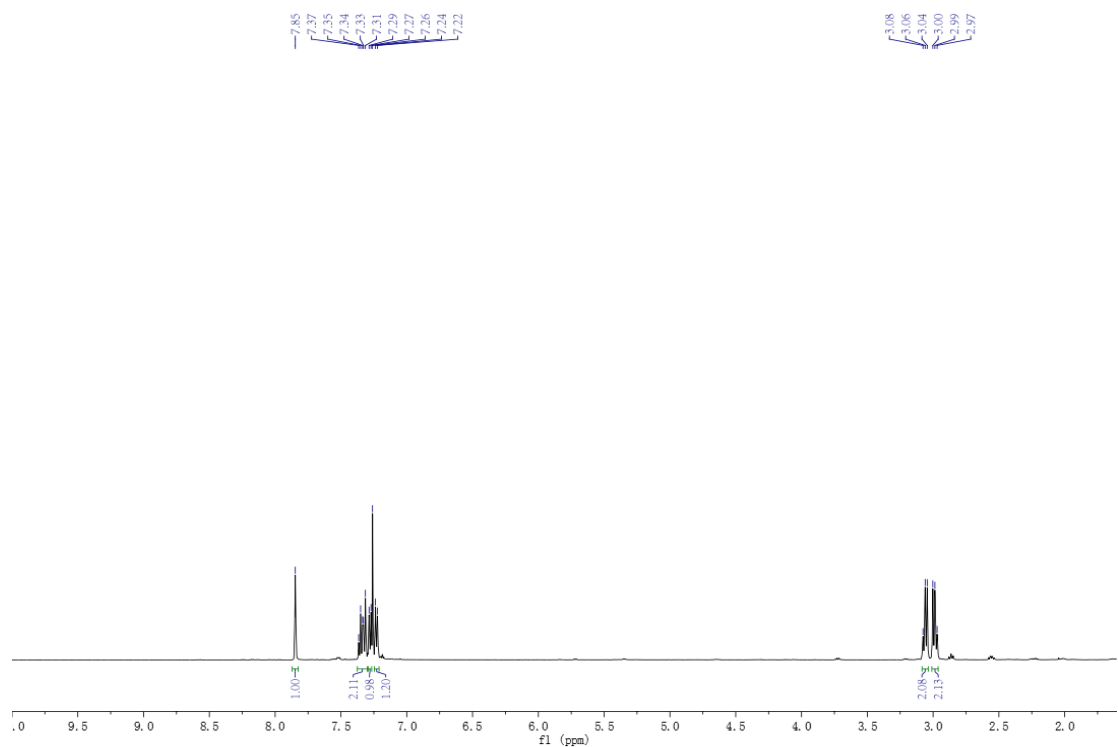

<sup>1</sup>H NMR of compound 138 (500 MHz, CDCl<sub>3</sub>)

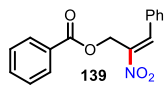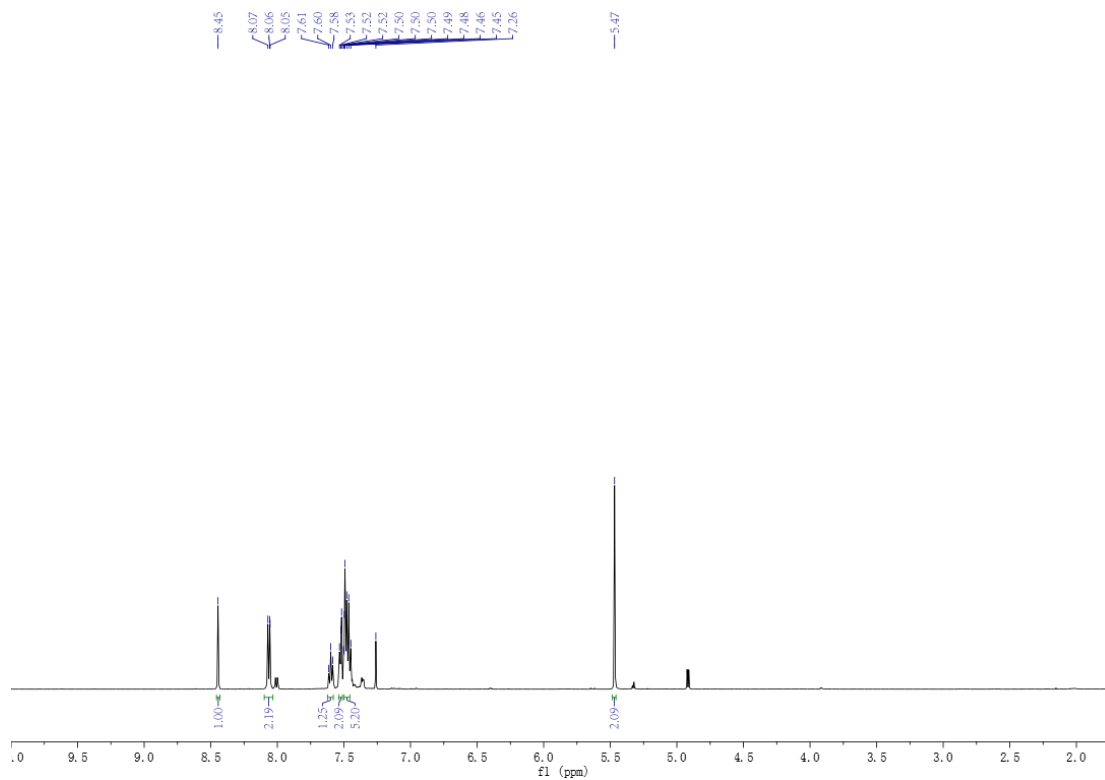

<sup>1</sup>H NMR of compound **139** (500 MHz, CDCl<sub>3</sub>)

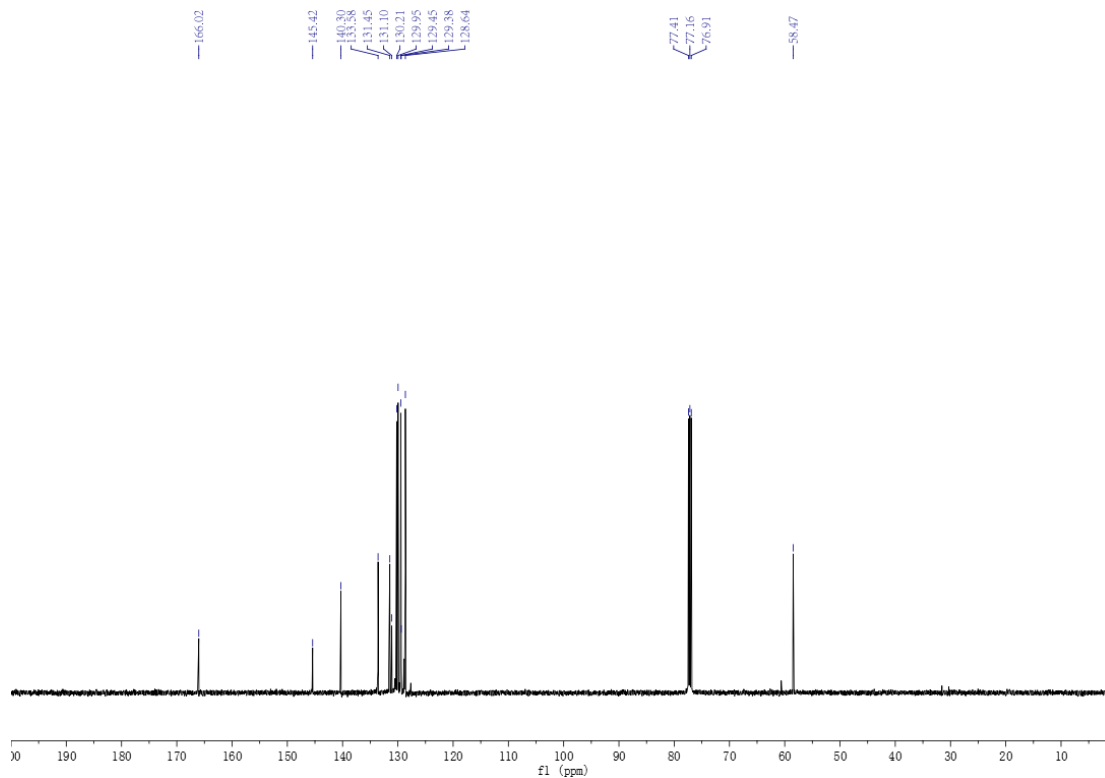

<sup>13</sup>C NMR of compound **139** (126 MHz, CDCl<sub>3</sub>)

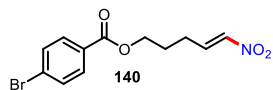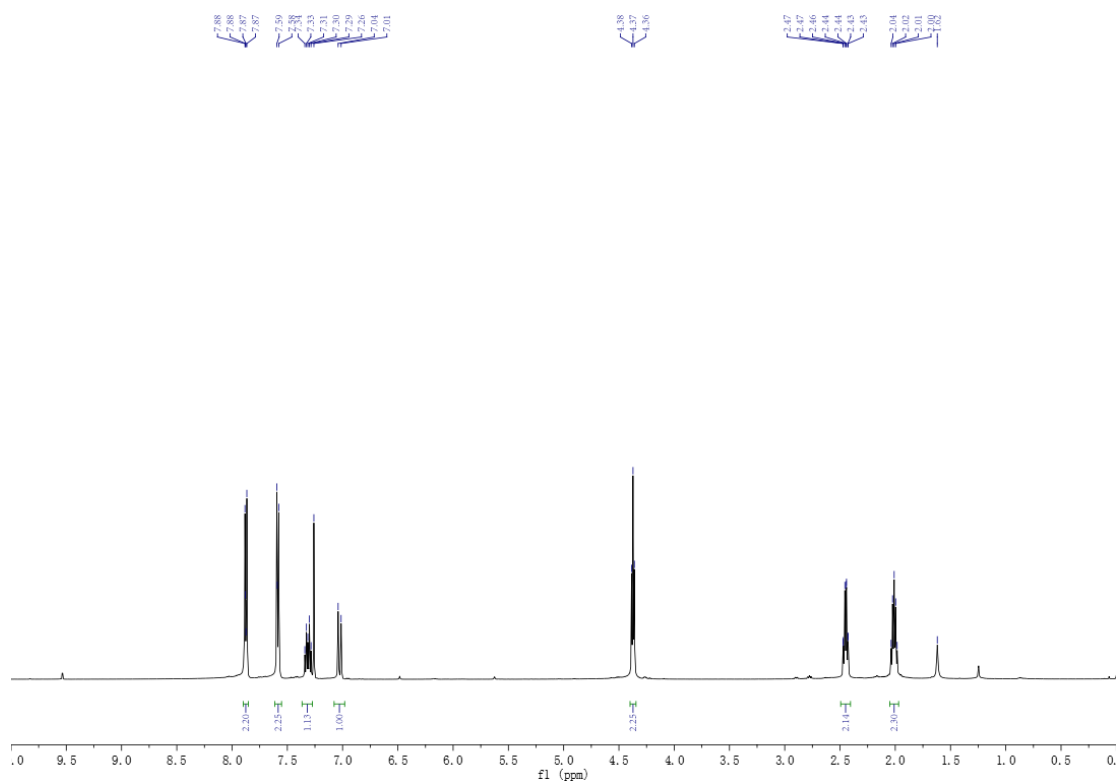

<sup>1</sup>H NMR of compound **140** (500 MHz, CDCl<sub>3</sub>)

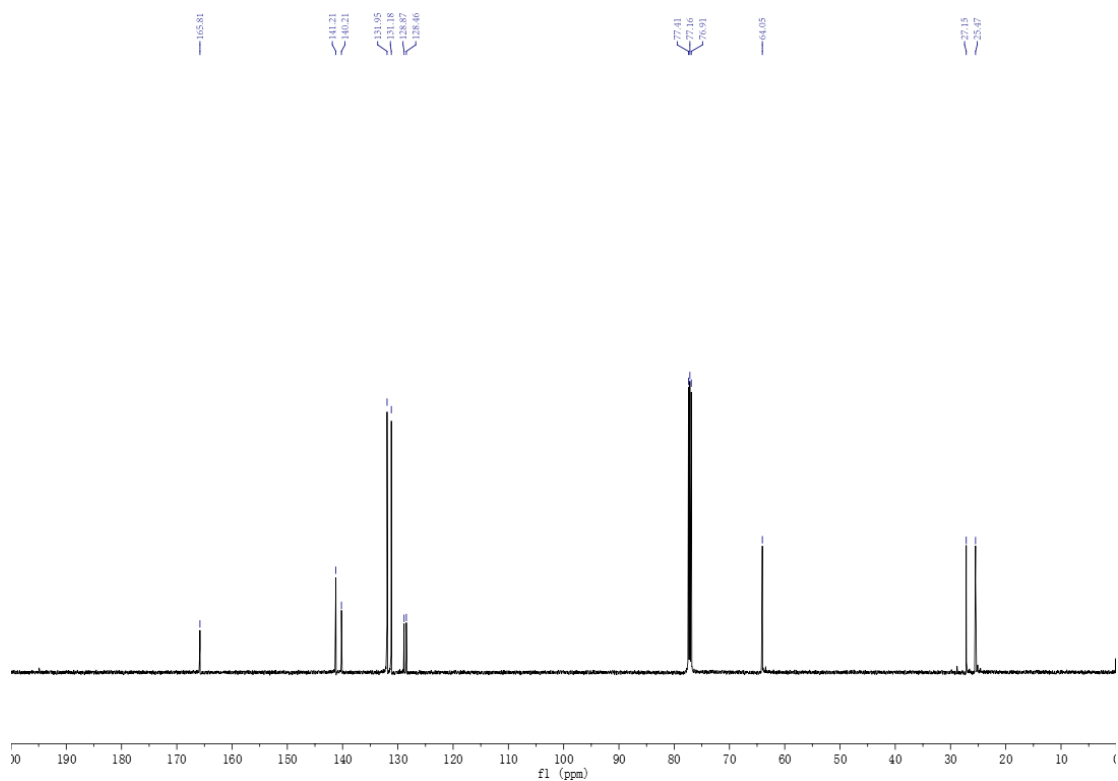

<sup>13</sup>C NMR of compound **140** (126 MHz, CDCl<sub>3</sub>)



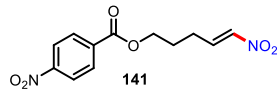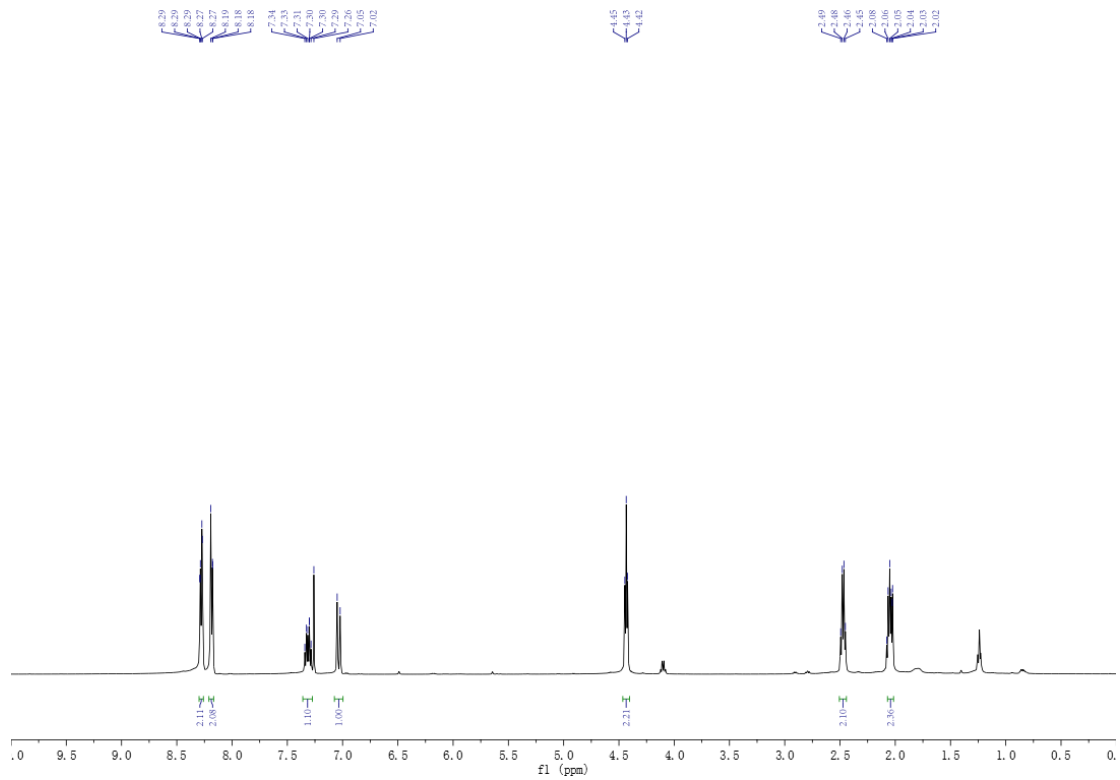

<sup>1</sup>H NMR of compound **141** (500 MHz, CDCl<sub>3</sub>)

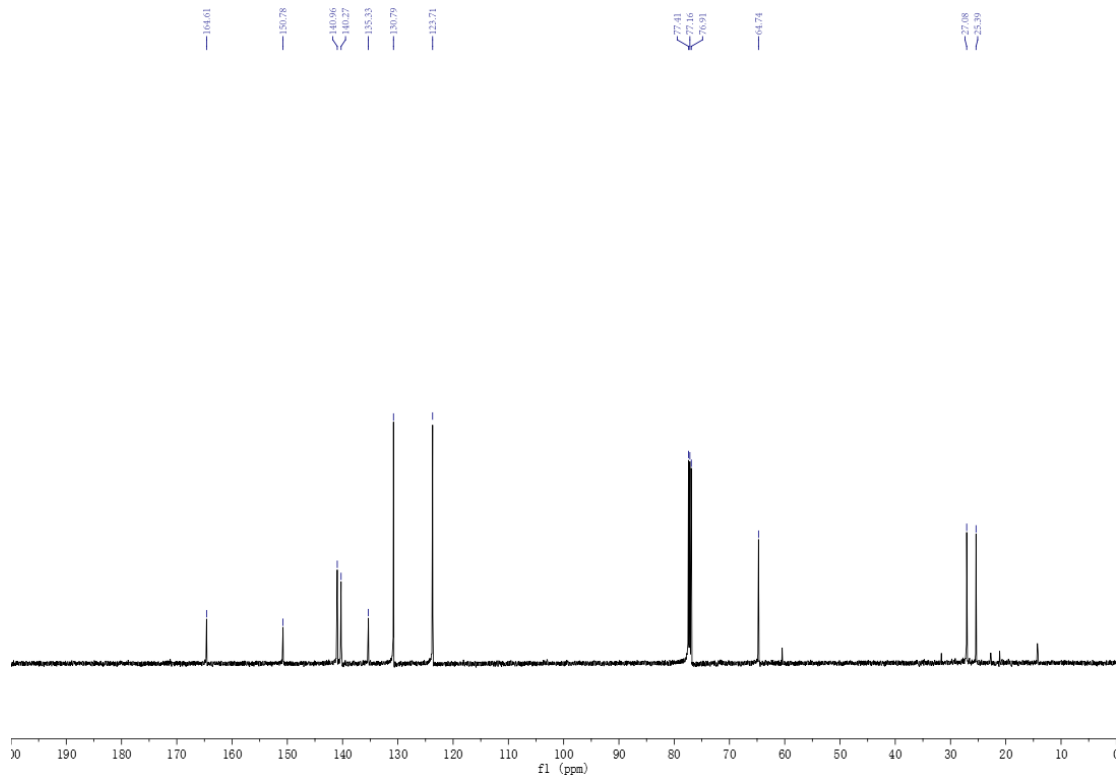

<sup>13</sup>C NMR of compound **141** (126 MHz, CDCl<sub>3</sub>)

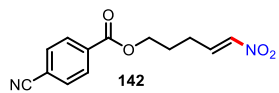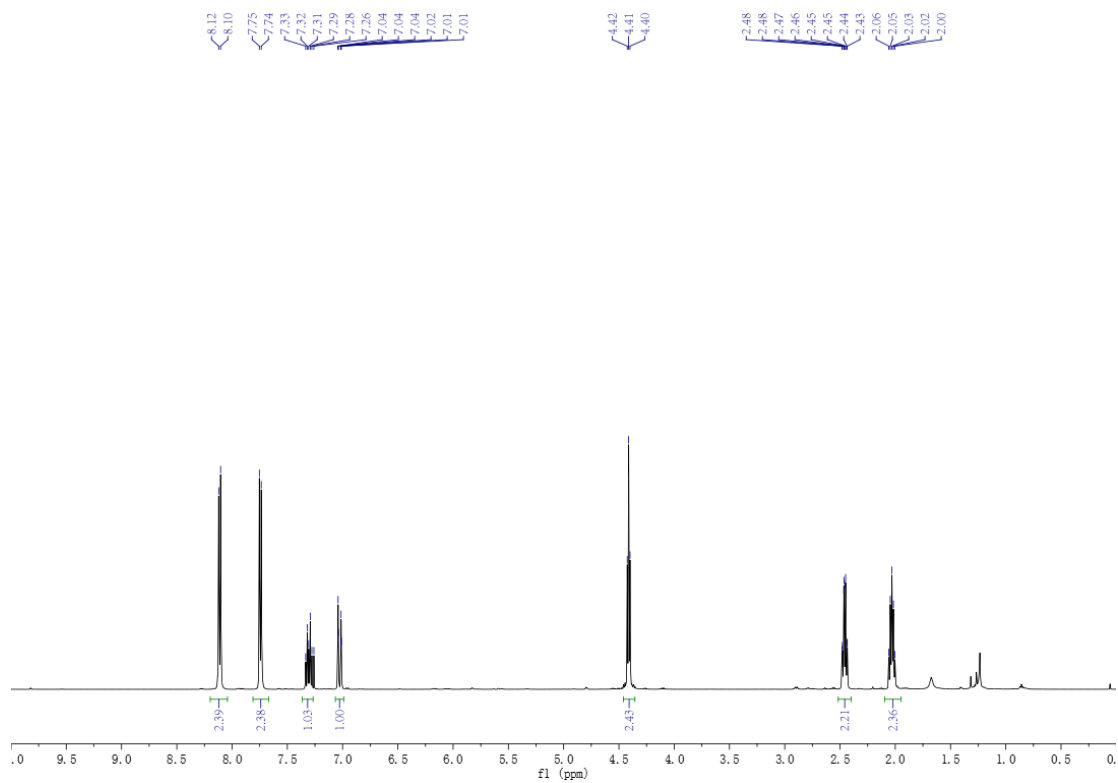

<sup>1</sup>H NMR of compound **142** (500 MHz, CDCl<sub>3</sub>)

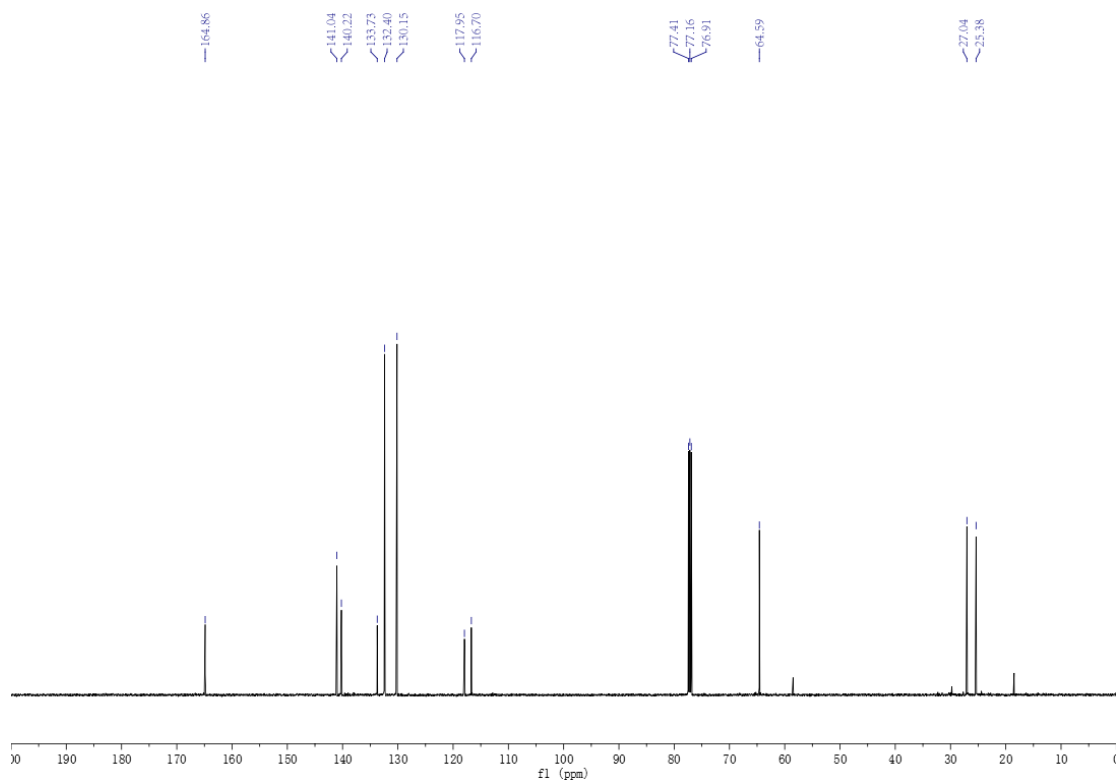

<sup>13</sup>C NMR of compound **142** (126 MHz, CDCl<sub>3</sub>)

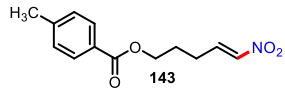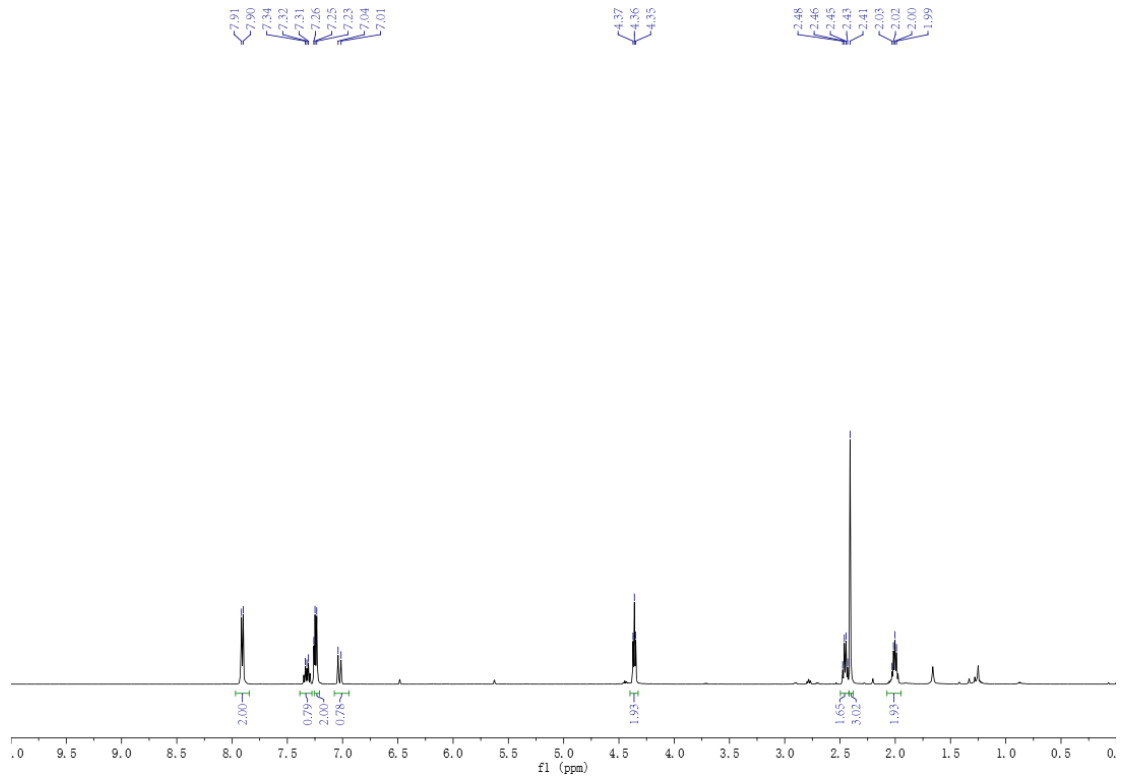

<sup>1</sup>H NMR of compound **143** (500 MHz, CDCl<sub>3</sub>)

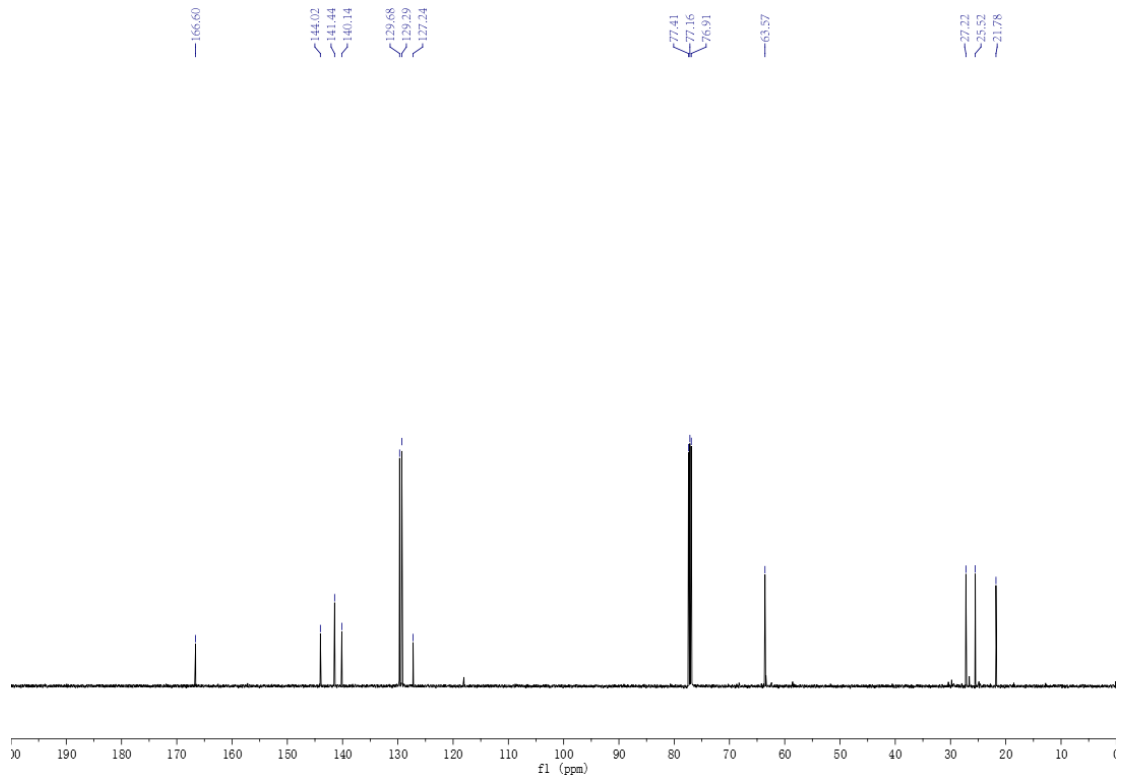

<sup>13</sup>C NMR of compound **143** (126 MHz, CDCl<sub>3</sub>)

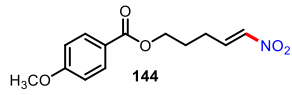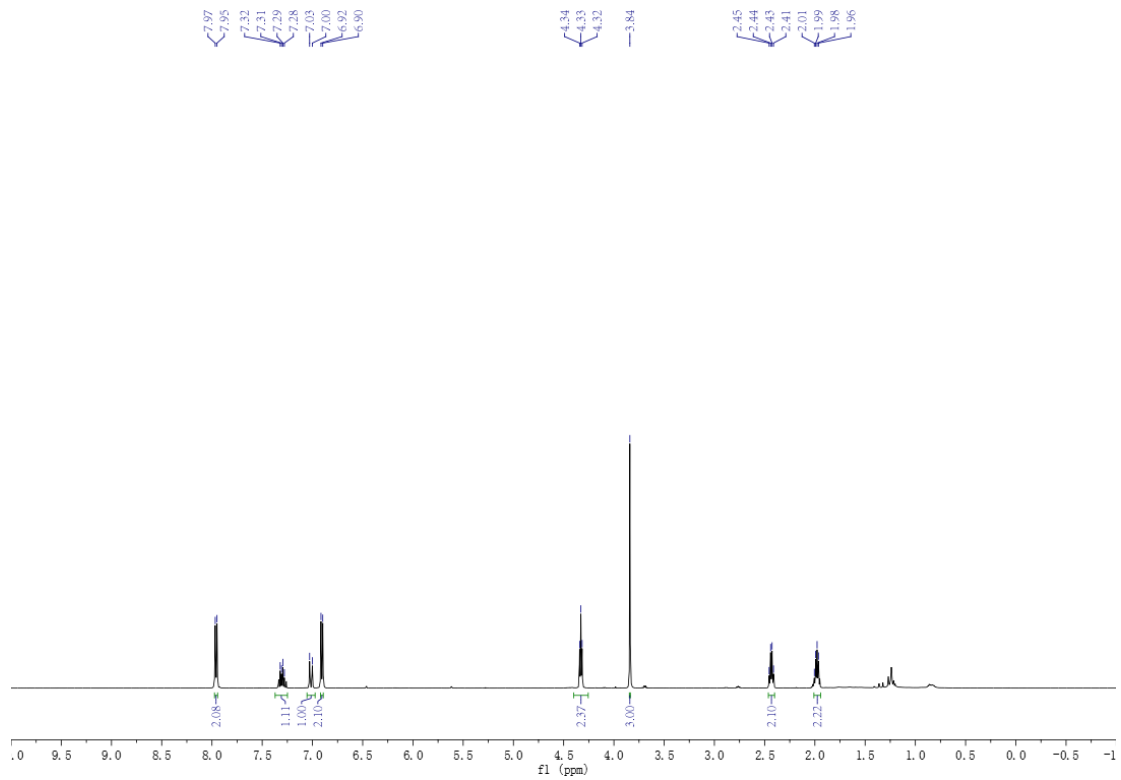

<sup>1</sup>H NMR of compound **144** (500 MHz, CDCl<sub>3</sub>)

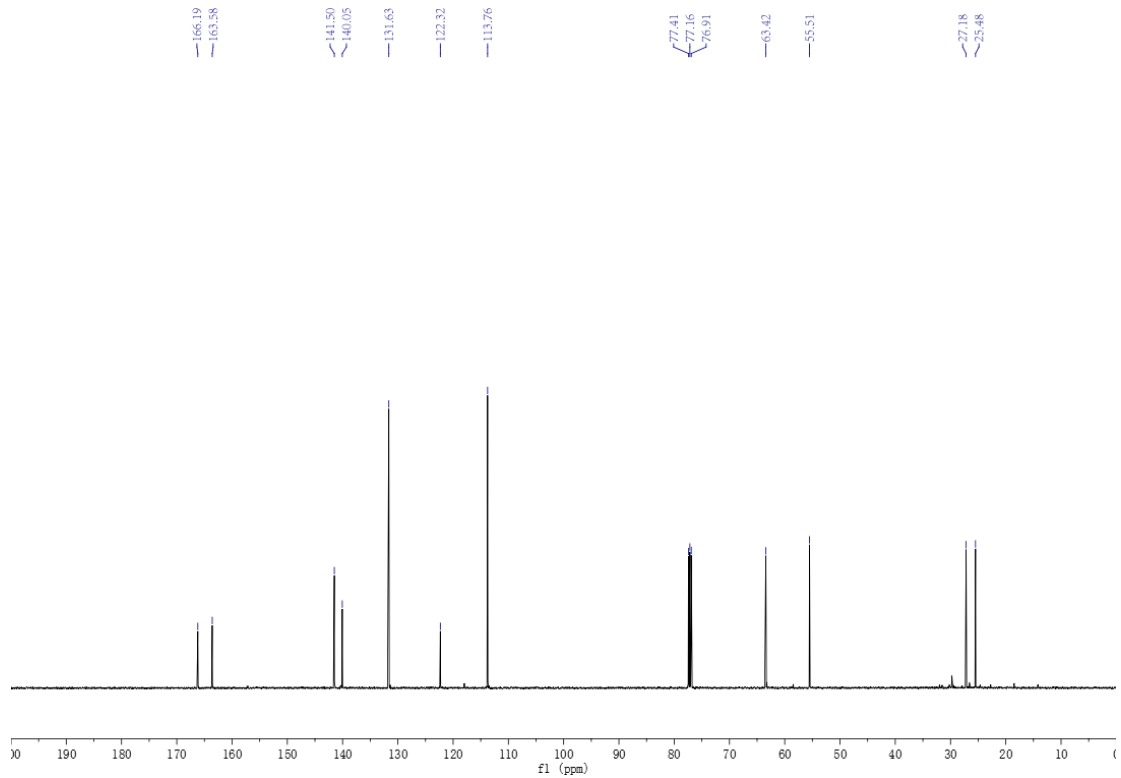

<sup>13</sup>C NMR of compound **144** (126 MHz, CDCl<sub>3</sub>)

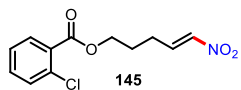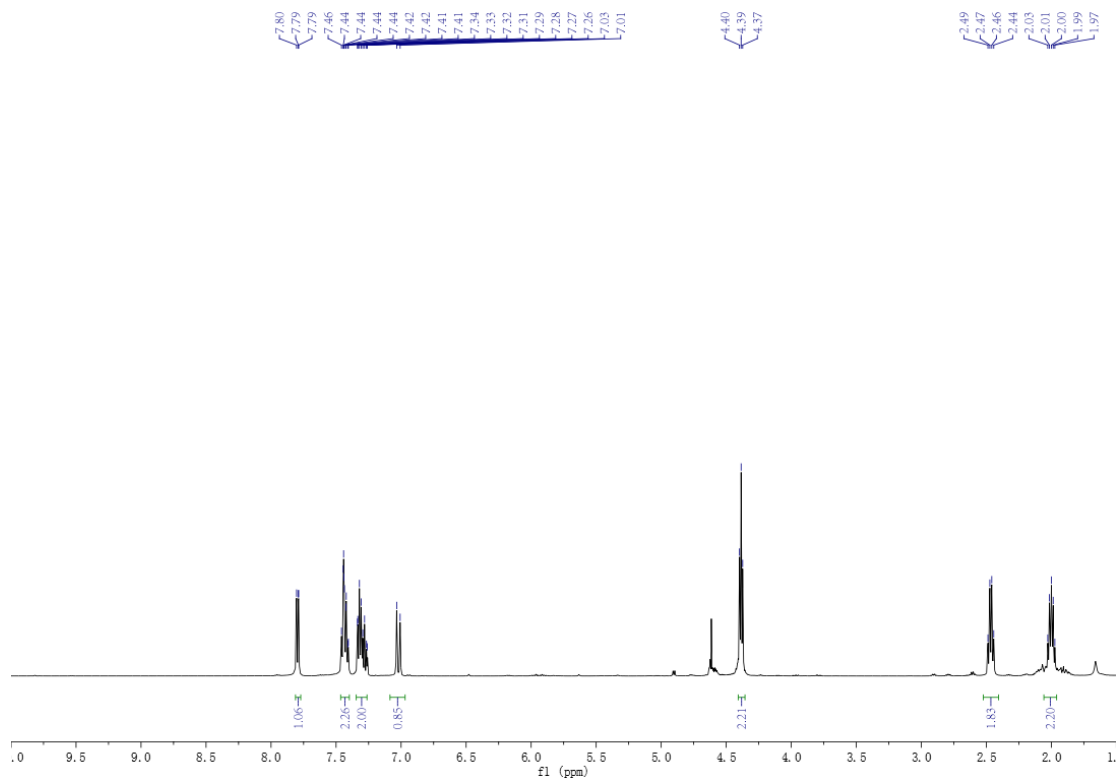

<sup>1</sup>H NMR of compound **145** (500 MHz, CDCl<sub>3</sub>)

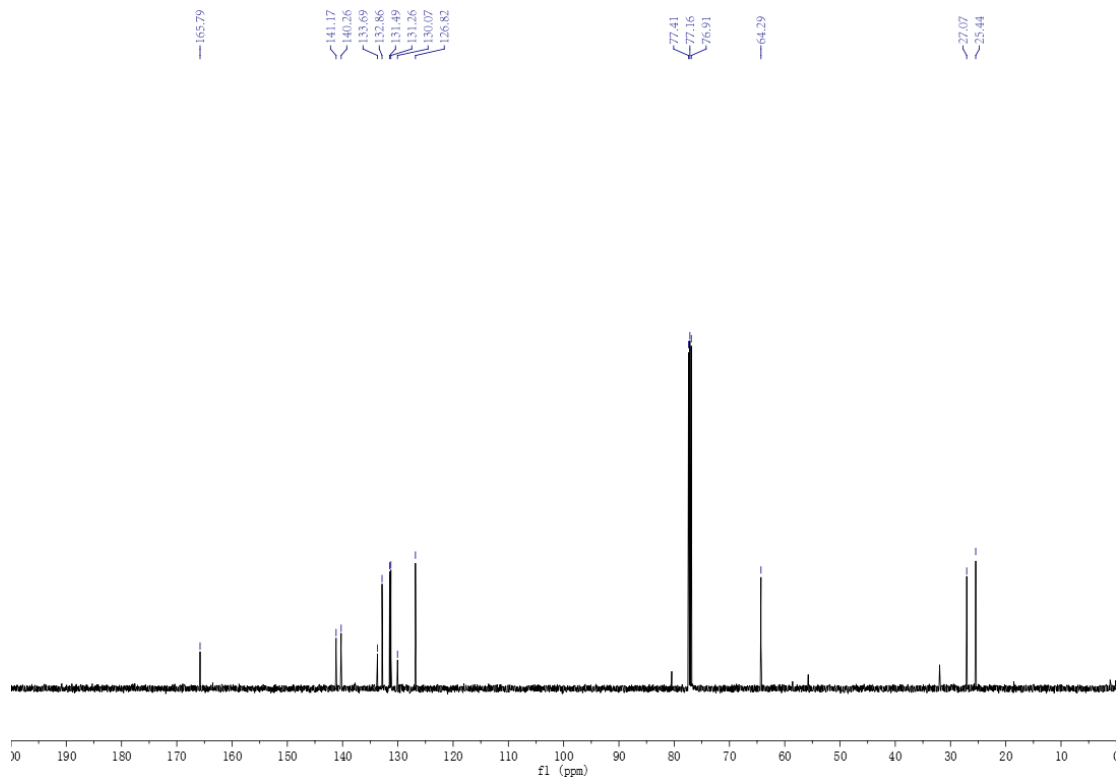

<sup>13</sup>C NMR of compound **145** (126 MHz, CDCl<sub>3</sub>)

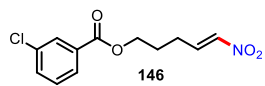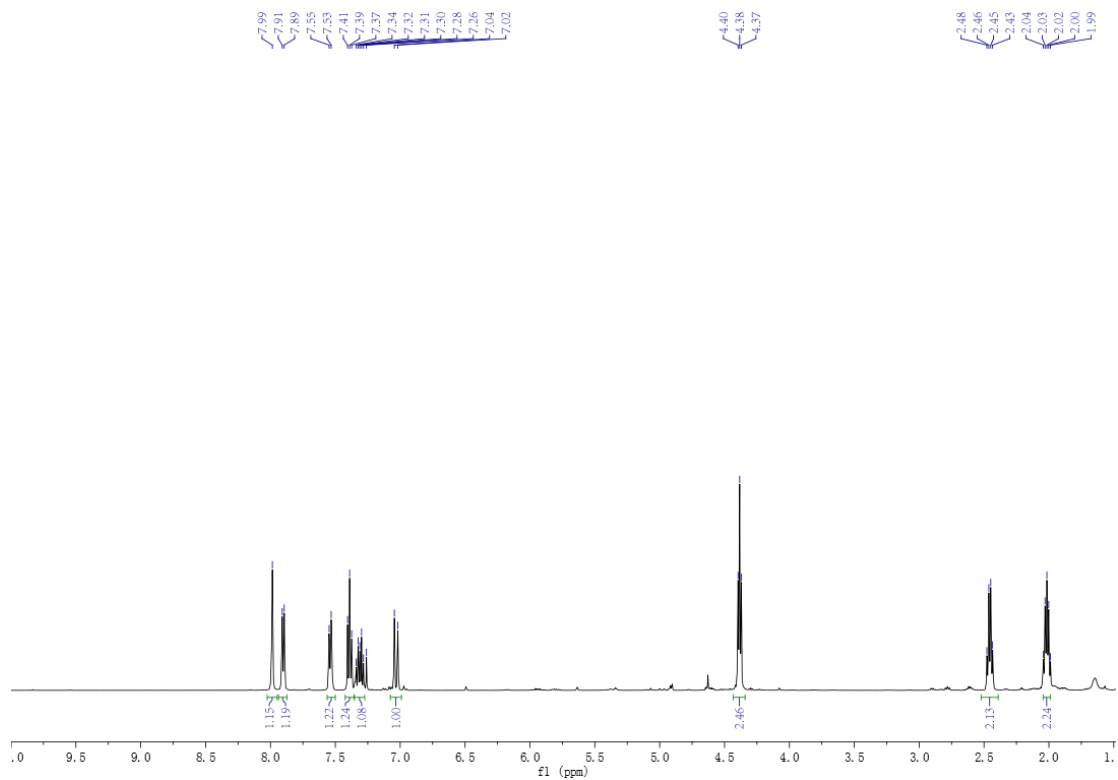

<sup>1</sup>H NMR of compound **146** (500 MHz, CDCl<sub>3</sub>)

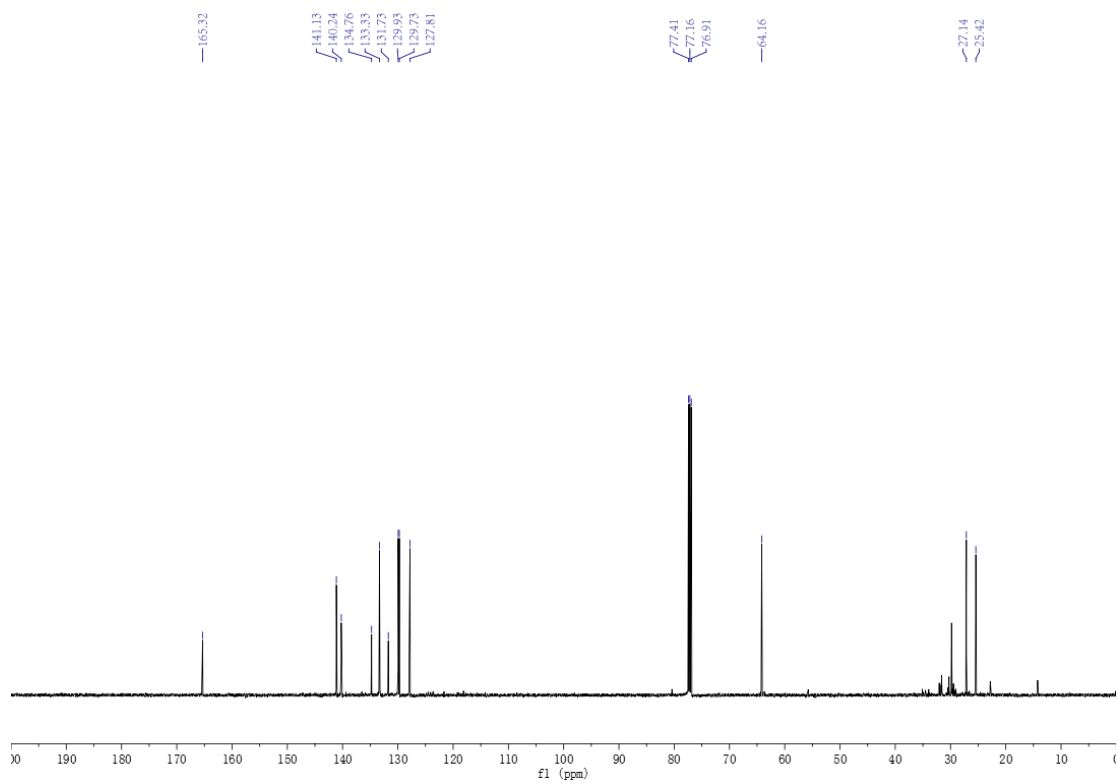

<sup>13</sup>C NMR of compound **146** (126 MHz, CDCl<sub>3</sub>)

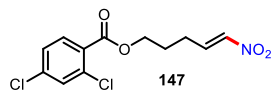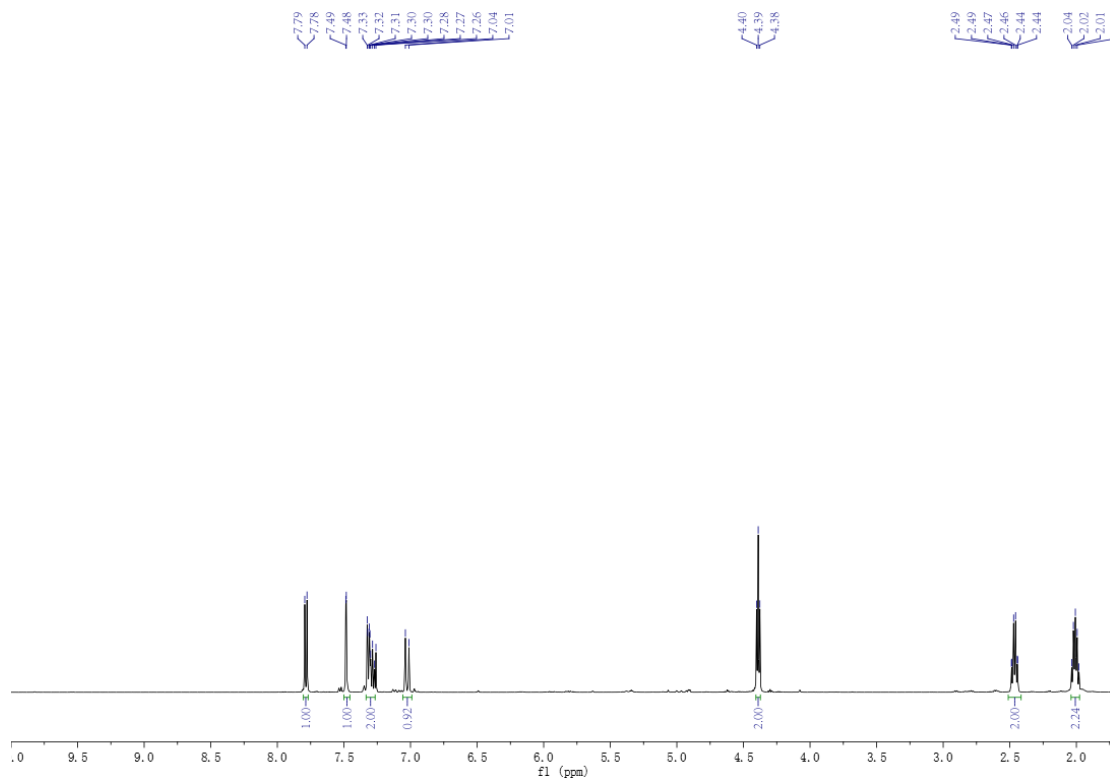

<sup>1</sup>H NMR of compound **147** (500 MHz, CDCl<sub>3</sub>)

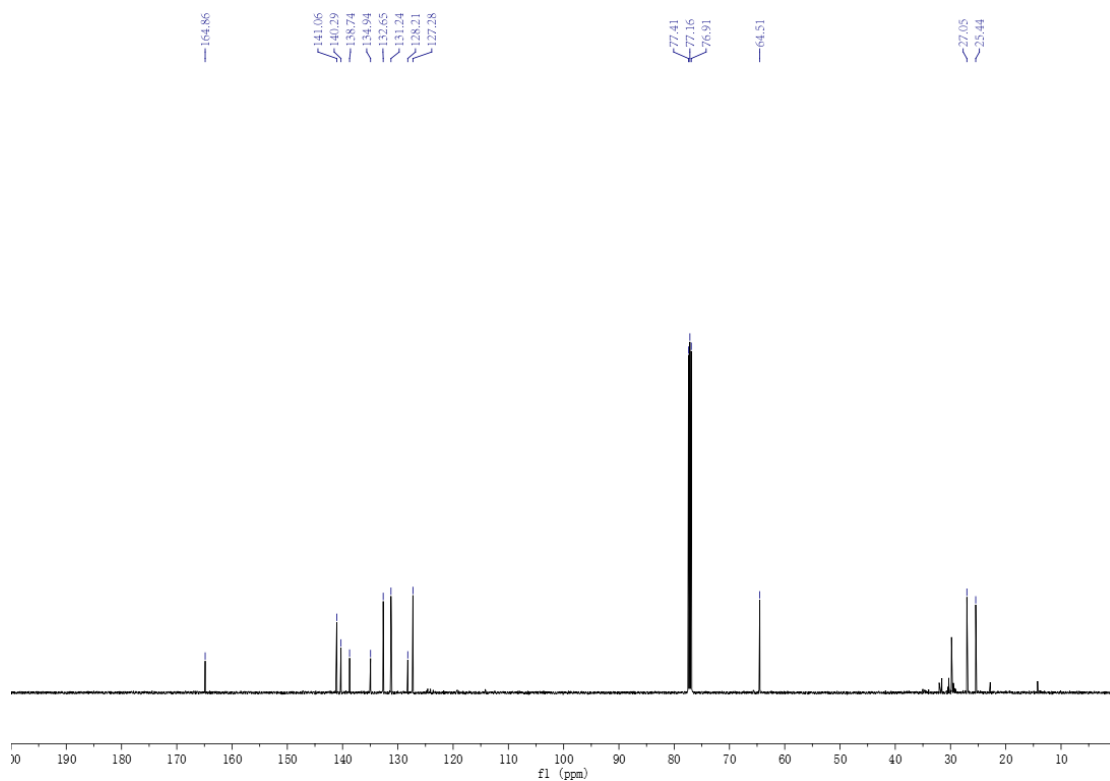

<sup>13</sup>C NMR of compound **147** (126 MHz, CDCl<sub>3</sub>)

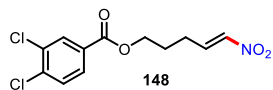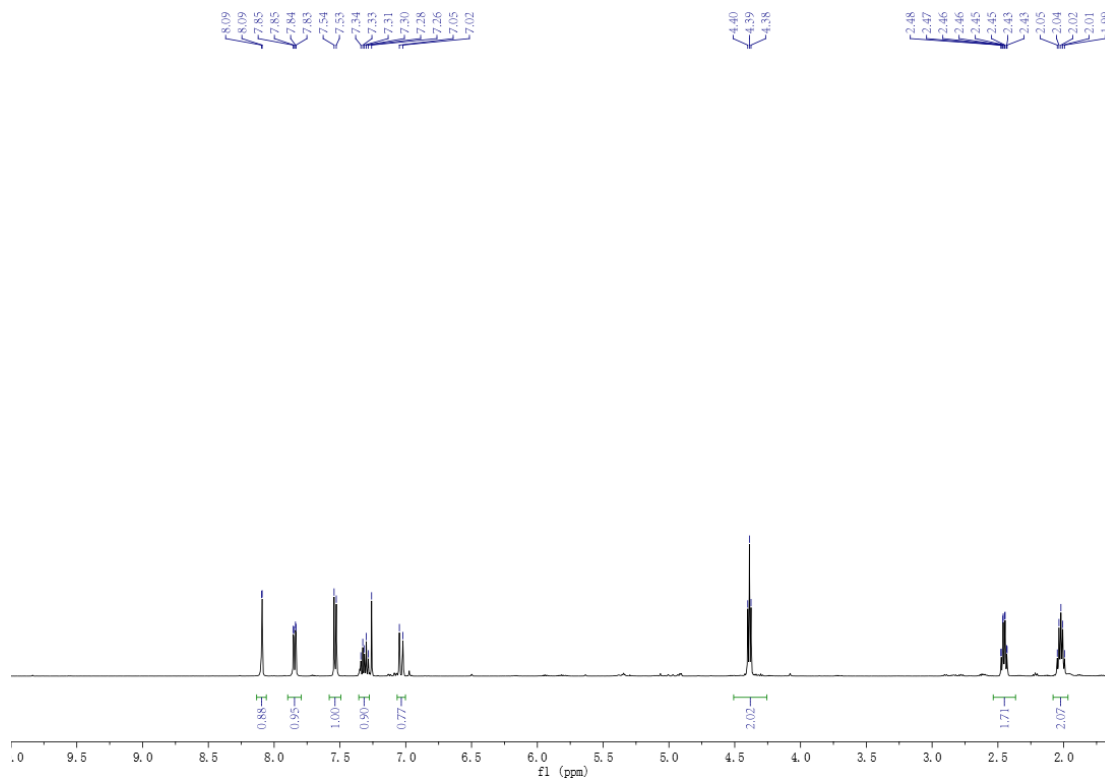

<sup>1</sup>H NMR of compound **148** (500 MHz, CDCl<sub>3</sub>)

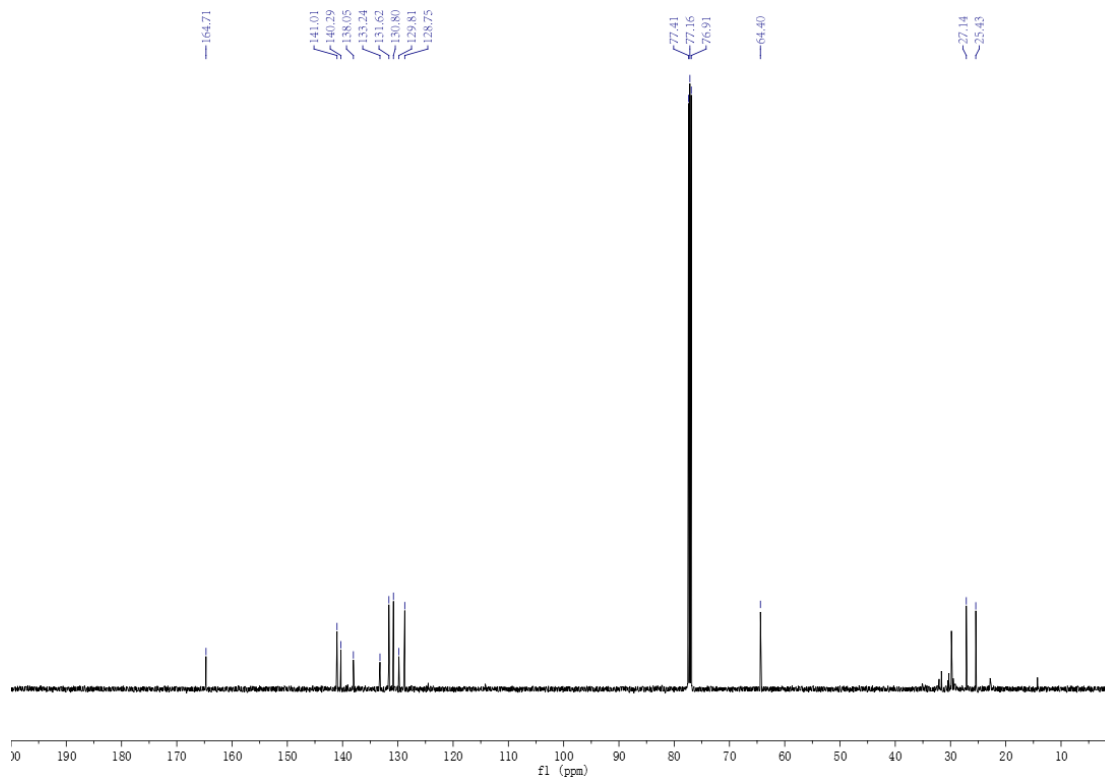

<sup>13</sup>C NMR of compound **148** (126 MHz, CDCl<sub>3</sub>)



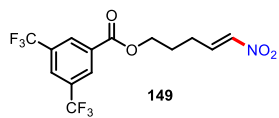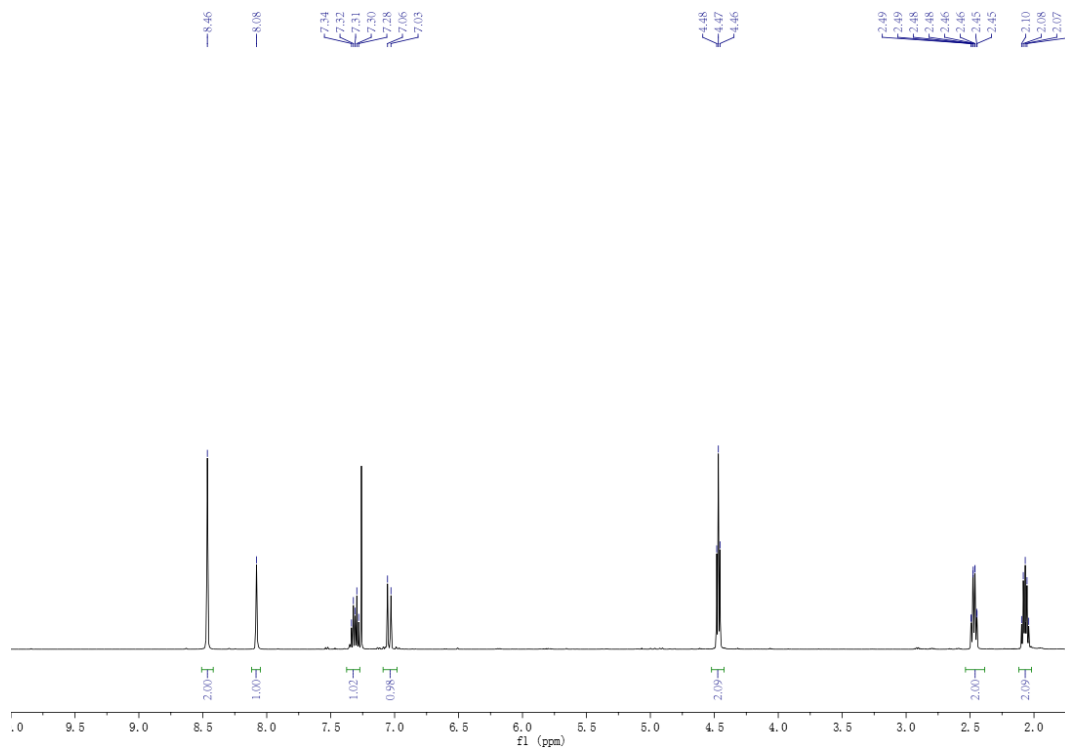

$^1\text{H}$  NMR of compound **149** (500 MHz,  $\text{CDCl}_3$ )

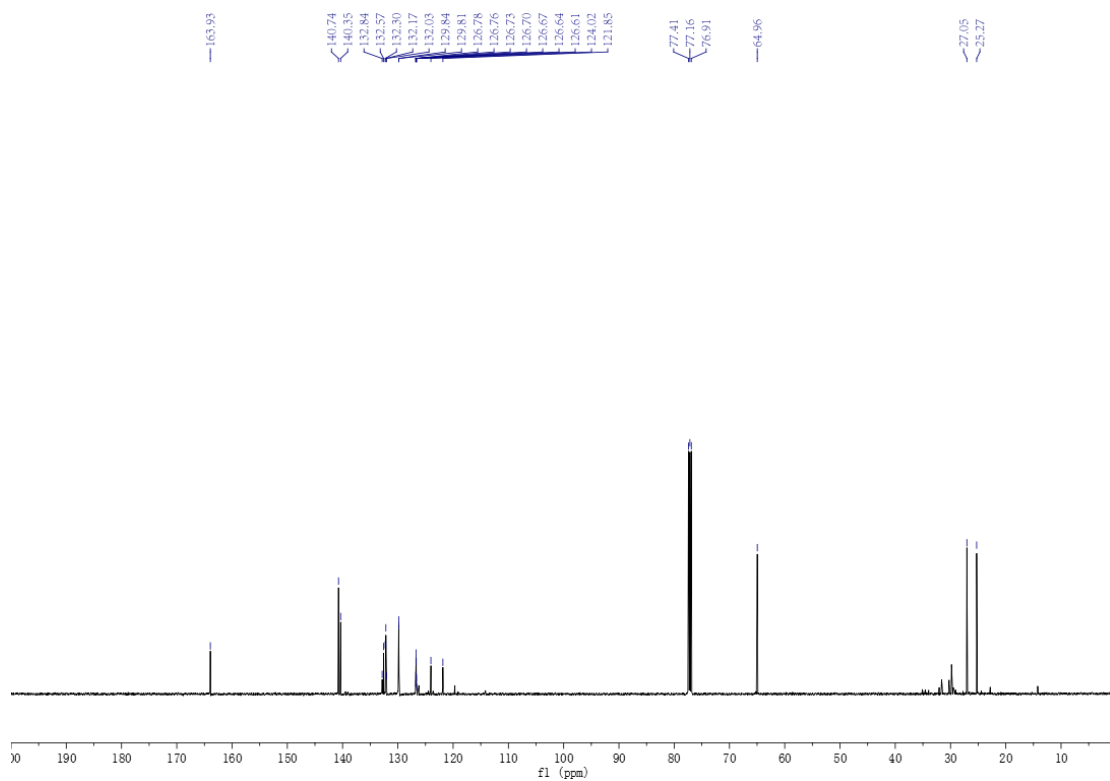

$^{13}\text{C}$  NMR of compound **149** (126 MHz,  $\text{CDCl}_3$ )

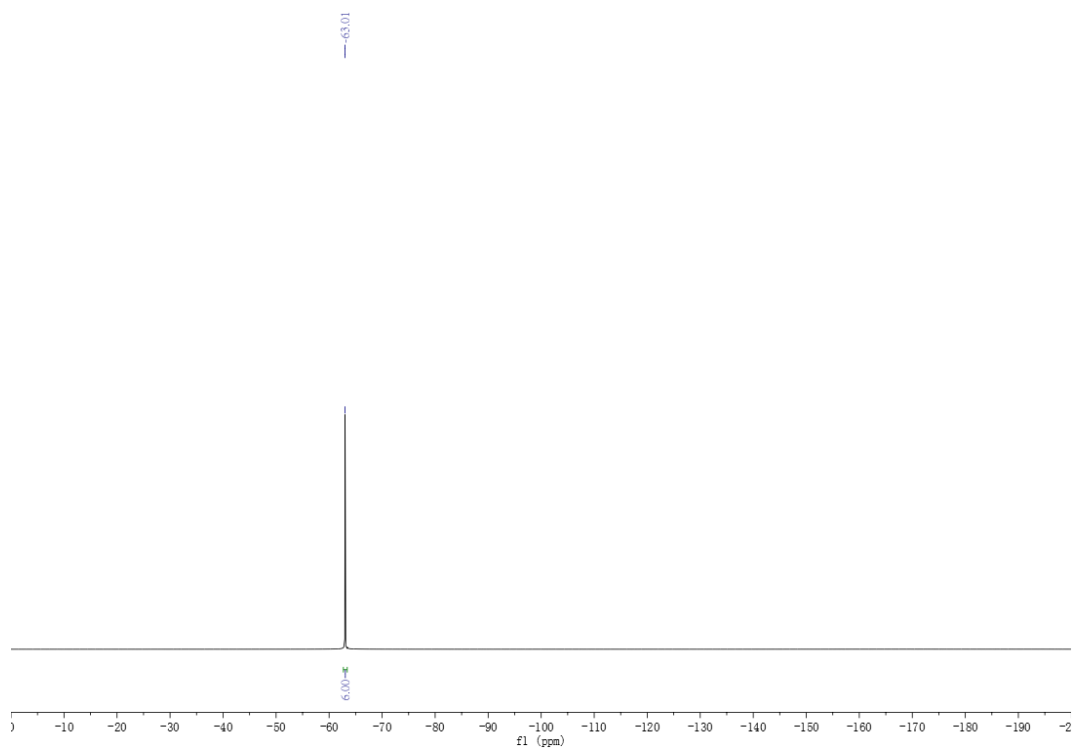

$^{19}\text{F}$  NMR of compound **149** (471 MHz,  $\text{CDCl}_3$ )

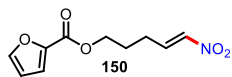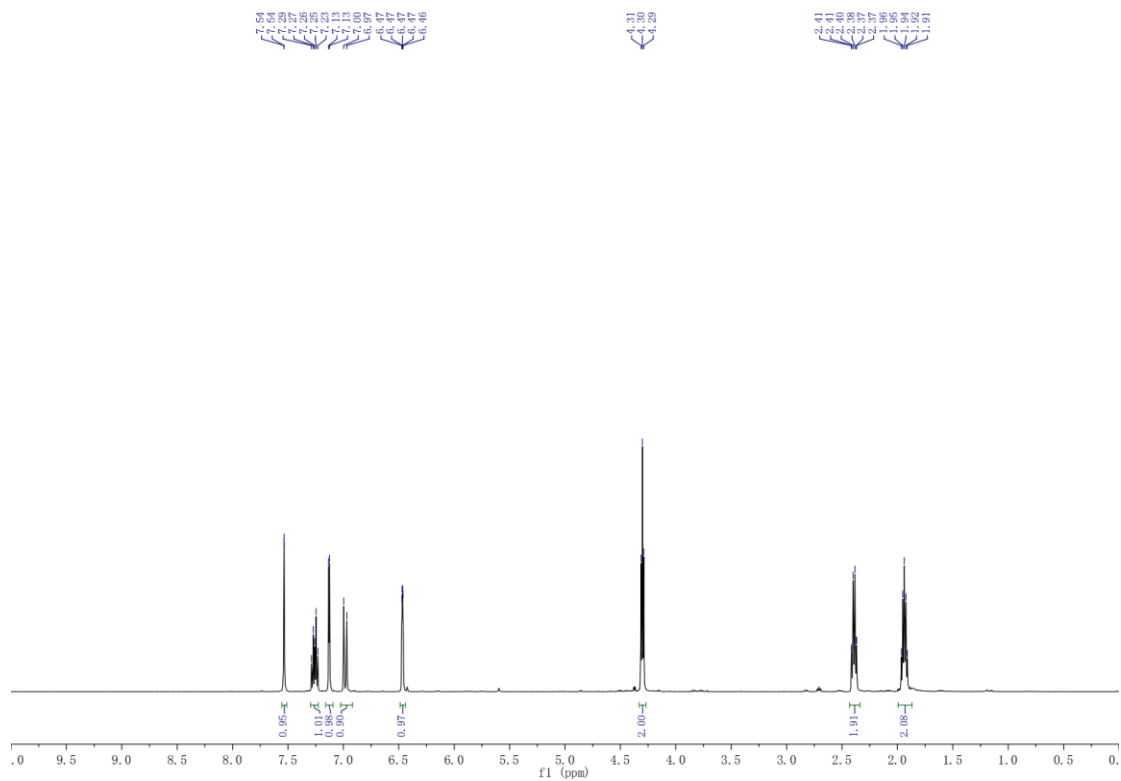

<sup>1</sup>H NMR of compound **150** (500 MHz, CDCl<sub>3</sub>)

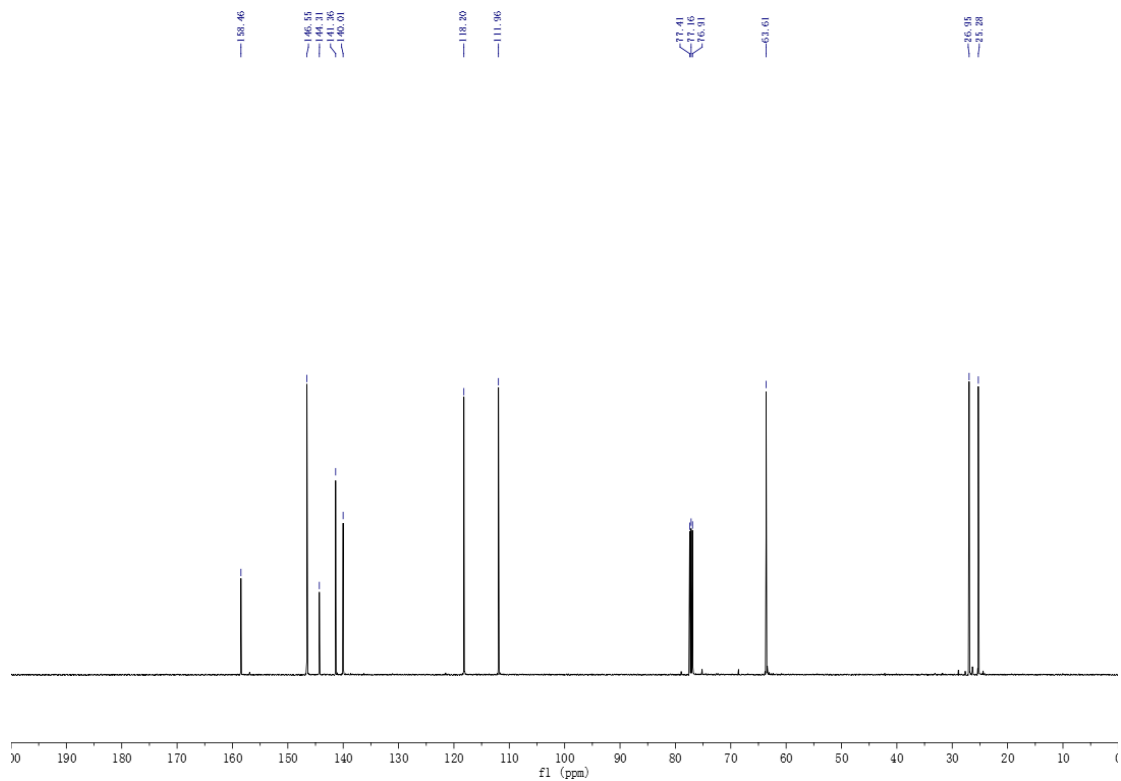

<sup>13</sup>C NMR of compound **150** (126 MHz, CDCl<sub>3</sub>)

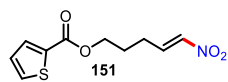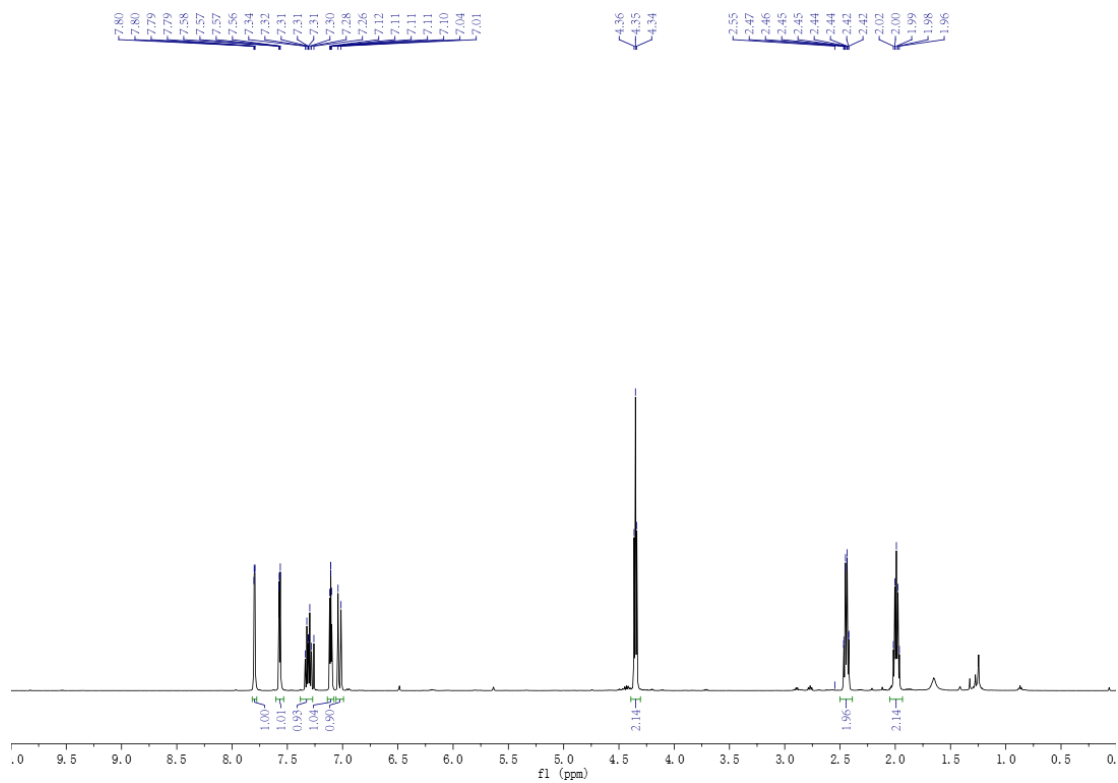

<sup>1</sup>H NMR of compound **151** (500 MHz, CDCl<sub>3</sub>)

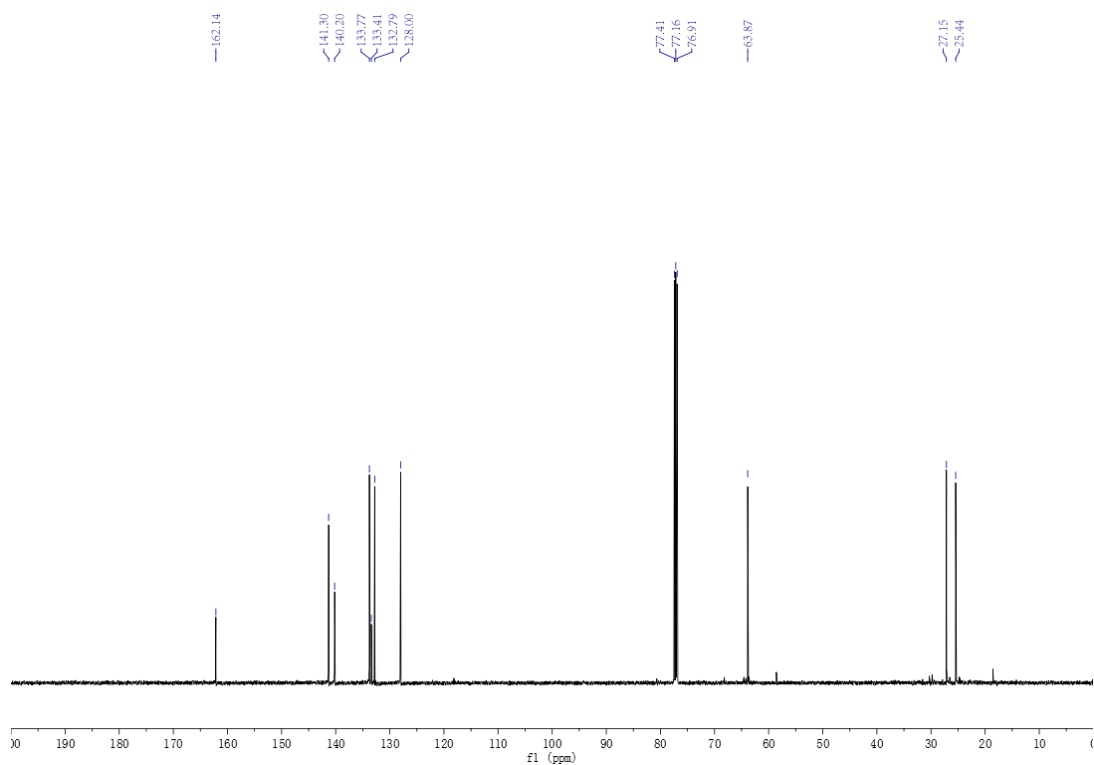

<sup>13</sup>C NMR of compound **151** (126 MHz, CDCl<sub>3</sub>)

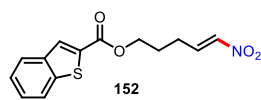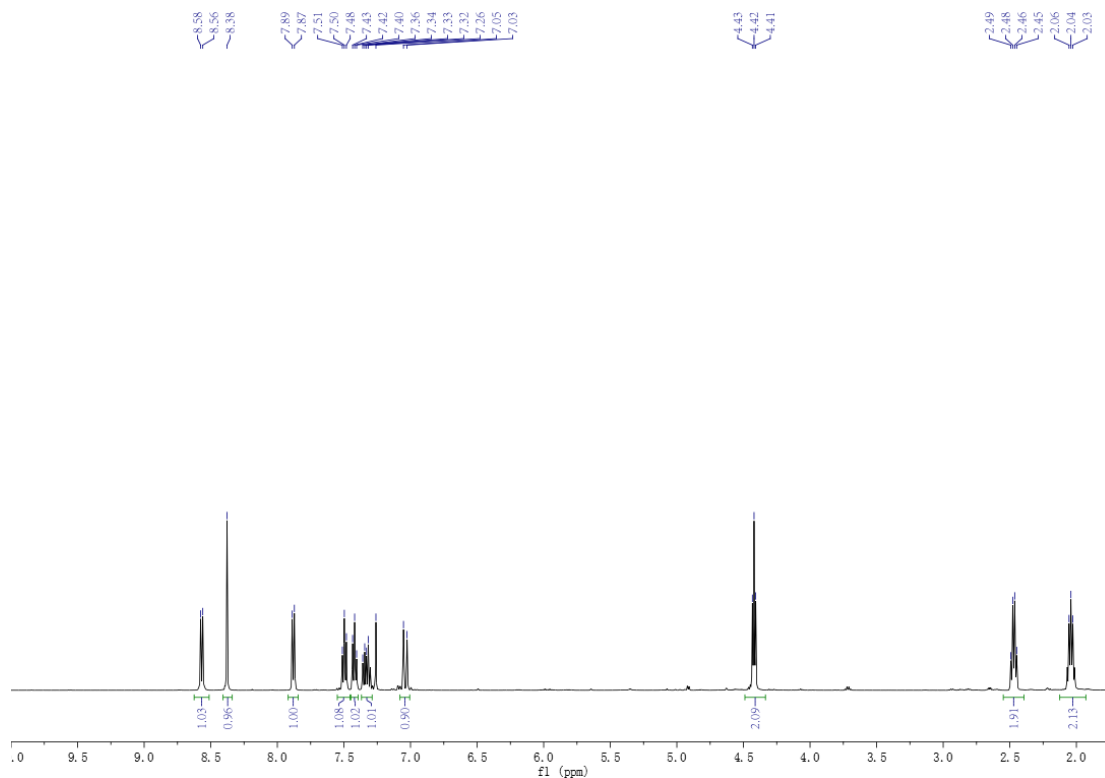

<sup>1</sup>H NMR of compound **152** (500 MHz, CDCl<sub>3</sub>)

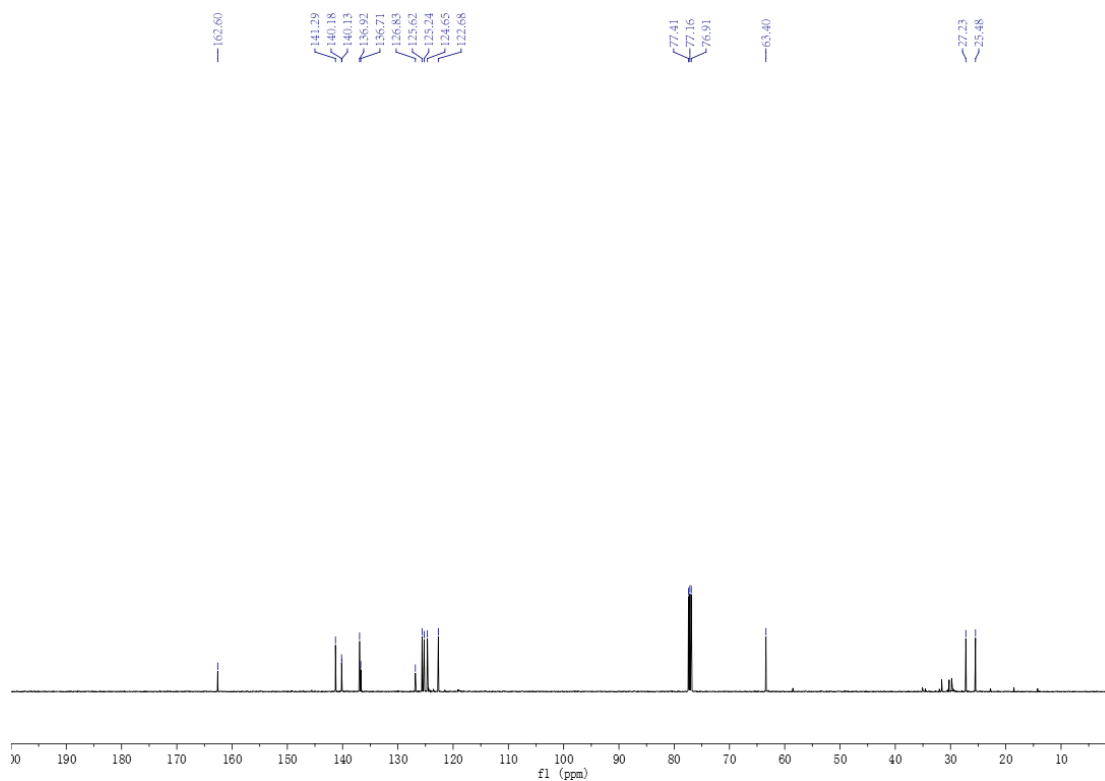

<sup>13</sup>C NMR of compound **152** (126 MHz, CDCl<sub>3</sub>)

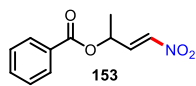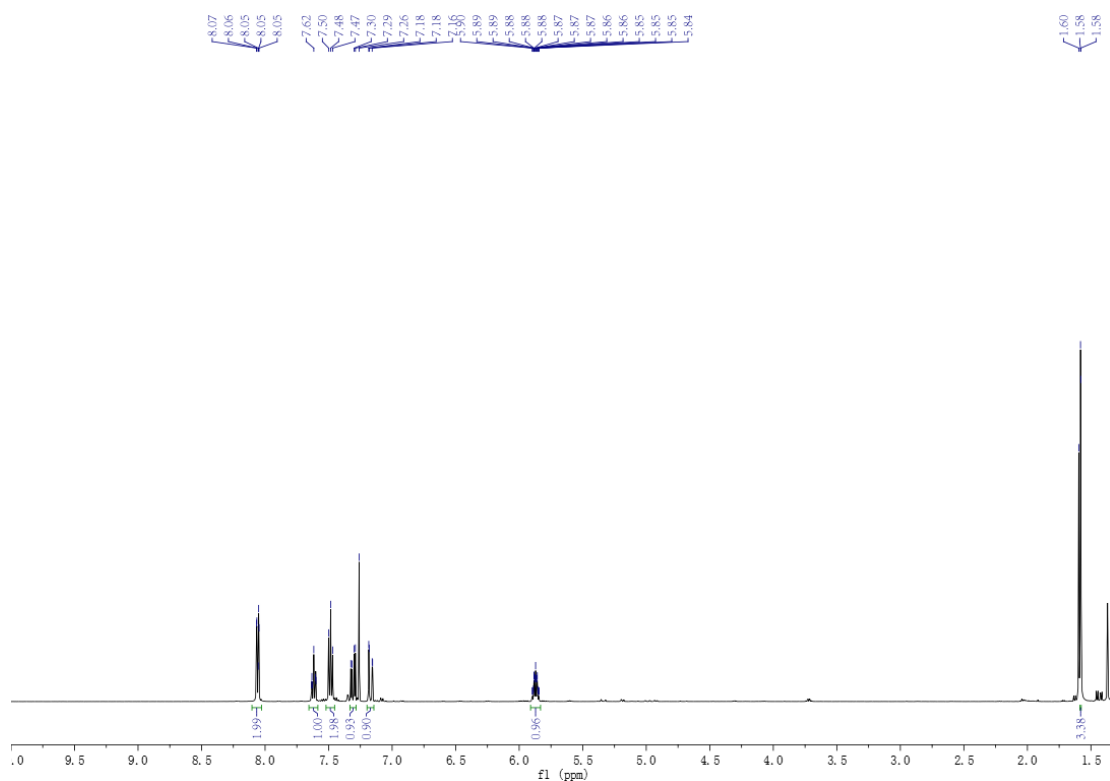

<sup>1</sup>H NMR of compound **153** (500 MHz, CDCl<sub>3</sub>)

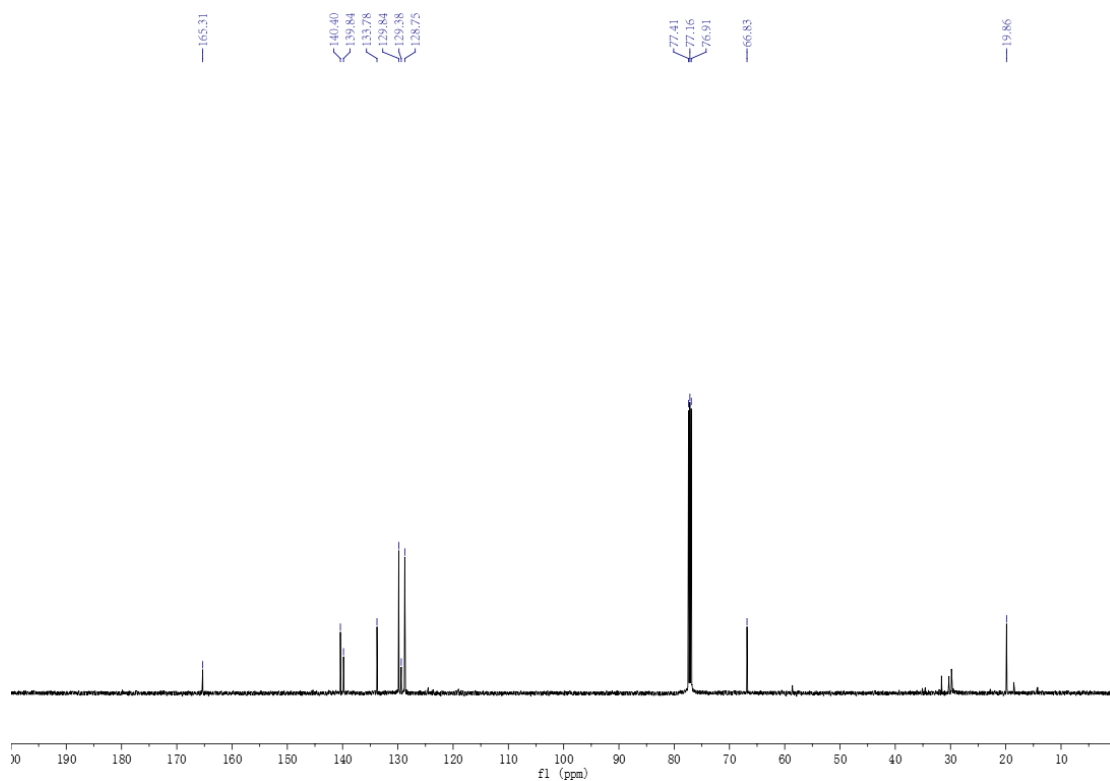

<sup>13</sup>C NMR of compound **153** (126 MHz, CDCl<sub>3</sub>)



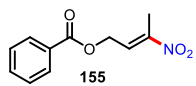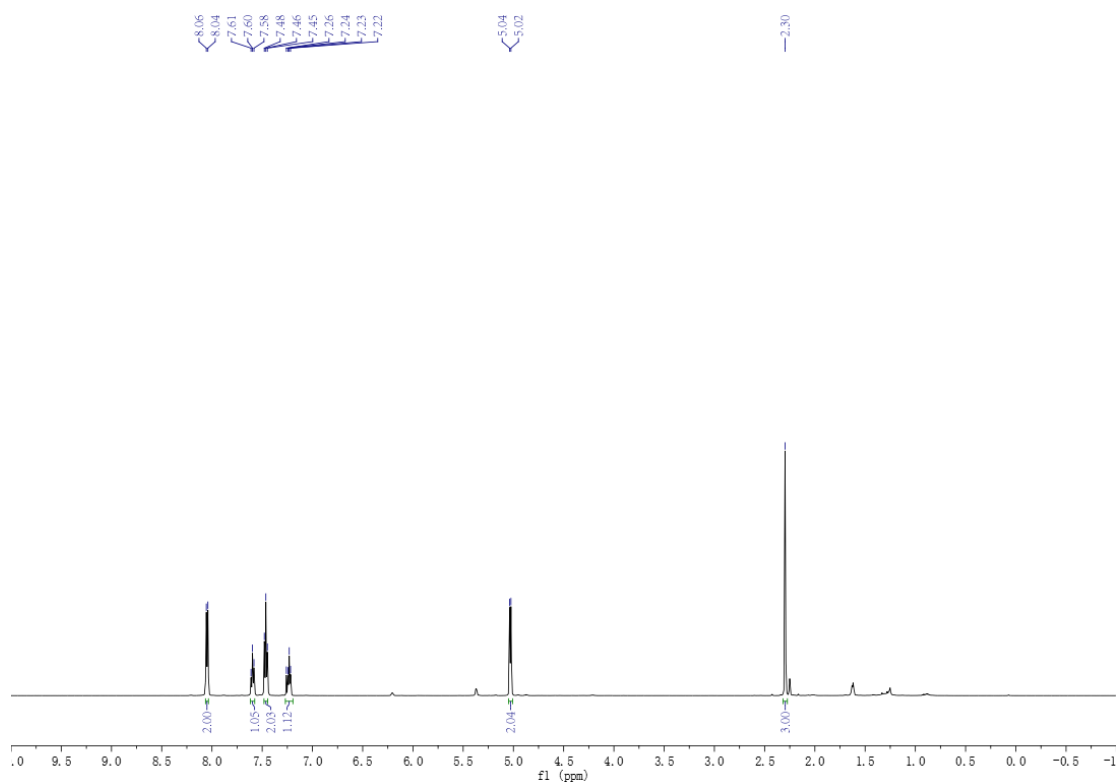

<sup>1</sup>H NMR of compound **155** (500 MHz, CDCl<sub>3</sub>)

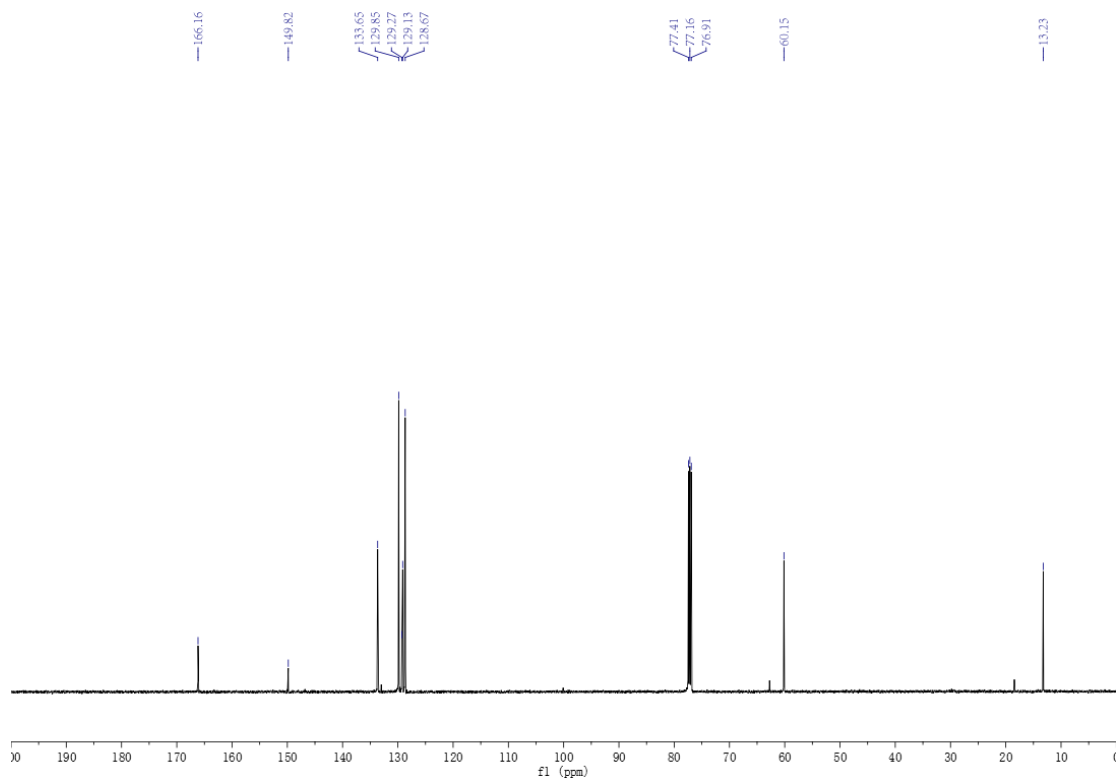

<sup>13</sup>C NMR of compound **155** (126 MHz, CDCl<sub>3</sub>)



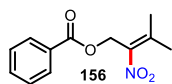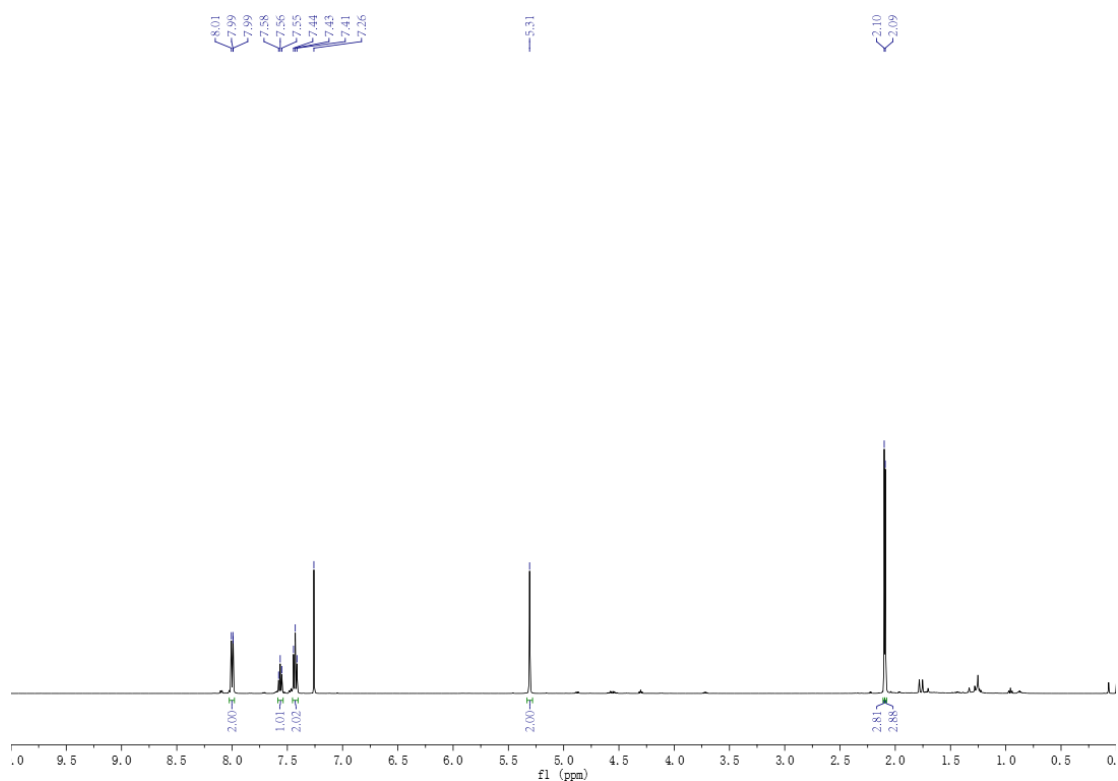

<sup>1</sup>H NMR of compound **156** (500 MHz, CDCl<sub>3</sub>)

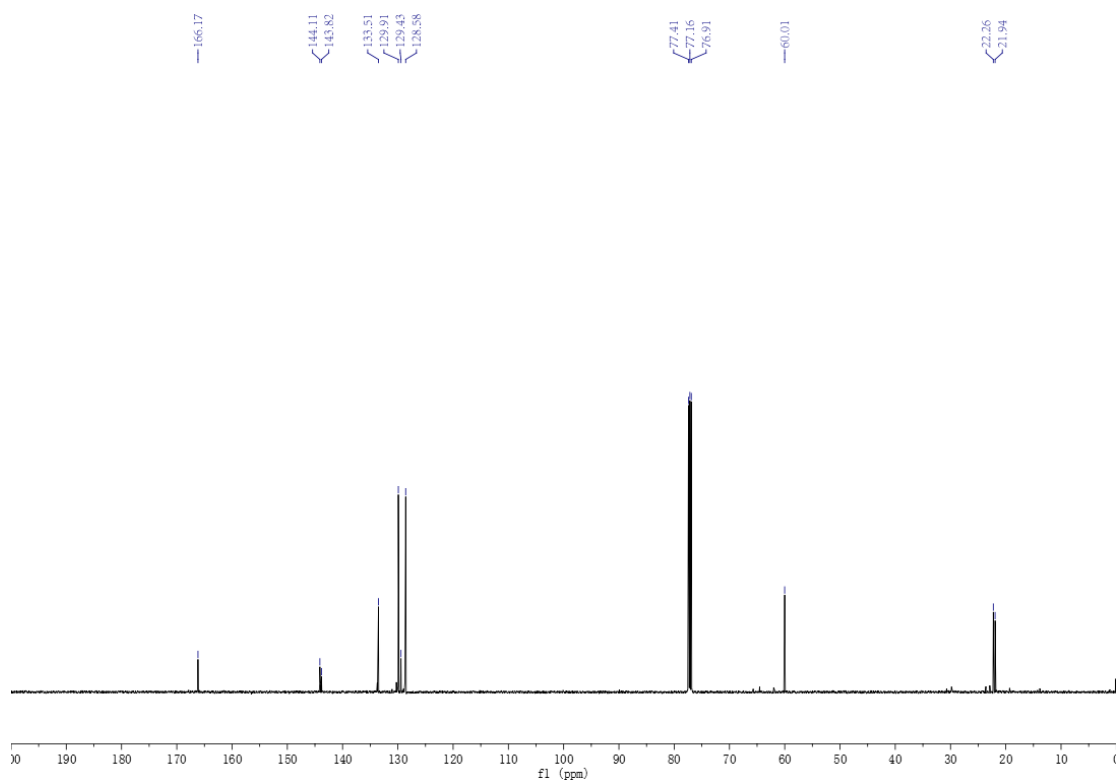

<sup>13</sup>C NMR of compound **156** (126 MHz, CDCl<sub>3</sub>)

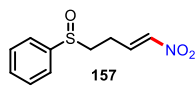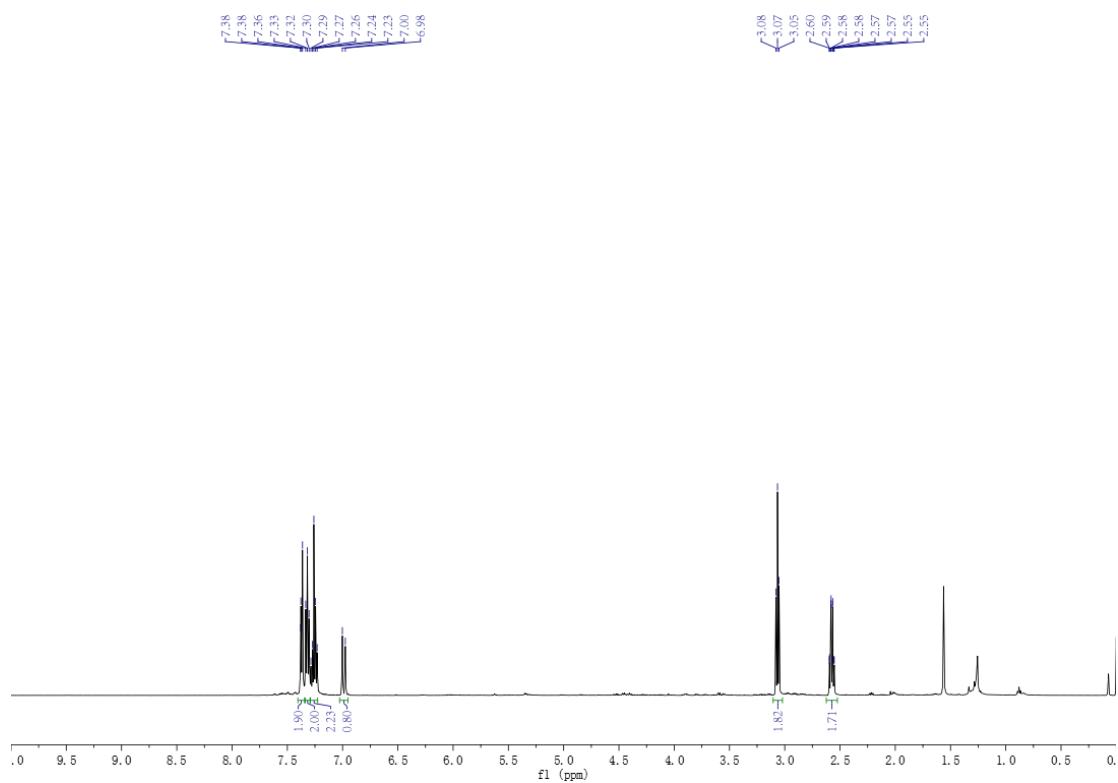

<sup>1</sup>H NMR of compound **157** (500 MHz, CDCl<sub>3</sub>)

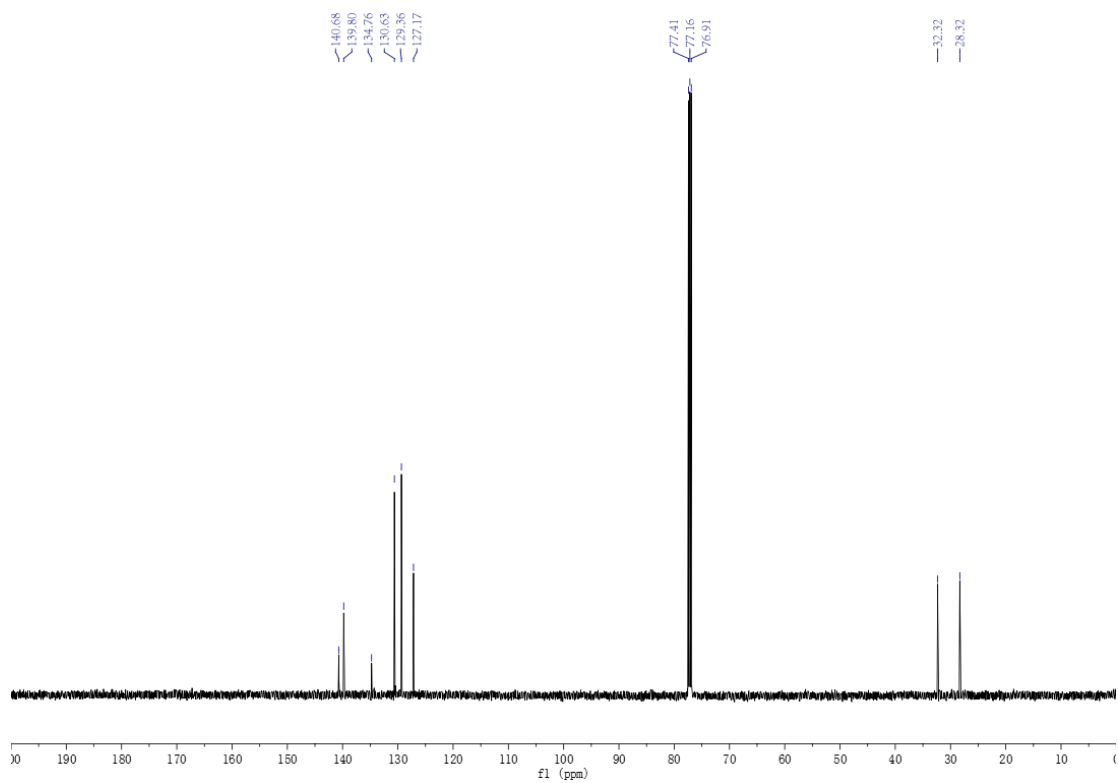

<sup>13</sup>C NMR of compound **157** (126 MHz, CDCl<sub>3</sub>)

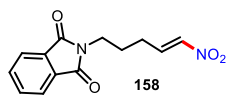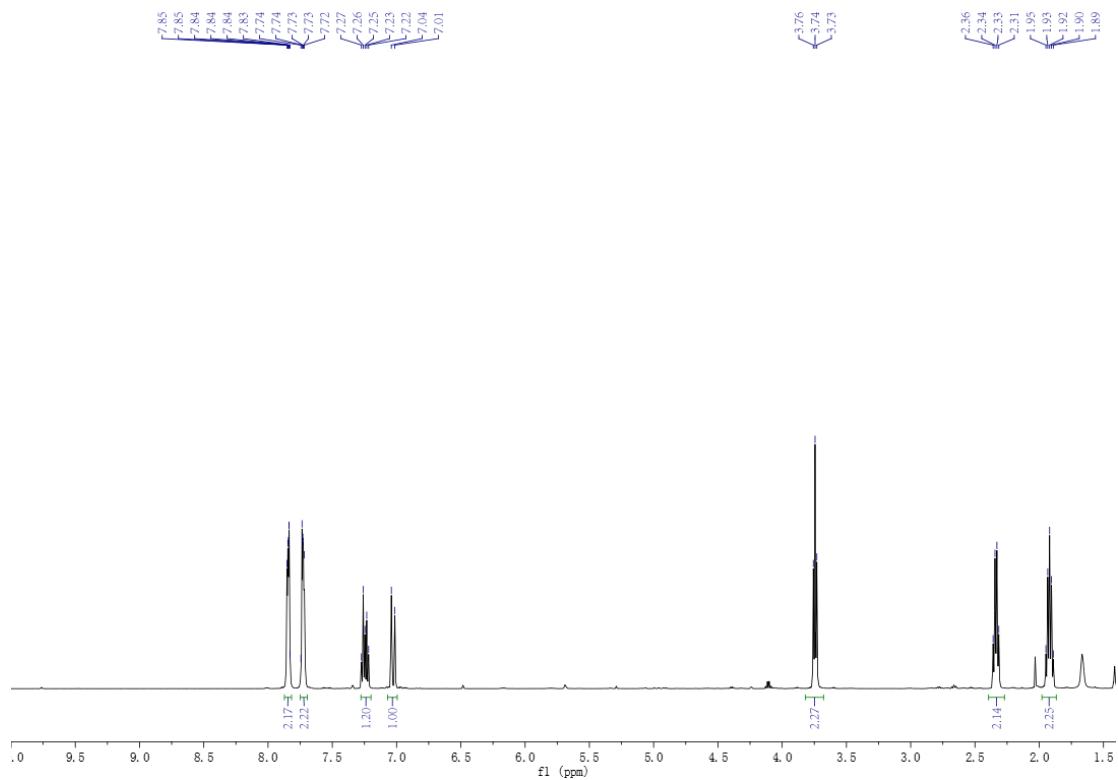

<sup>1</sup>H NMR of compound **158** (500 MHz, CDCl<sub>3</sub>)

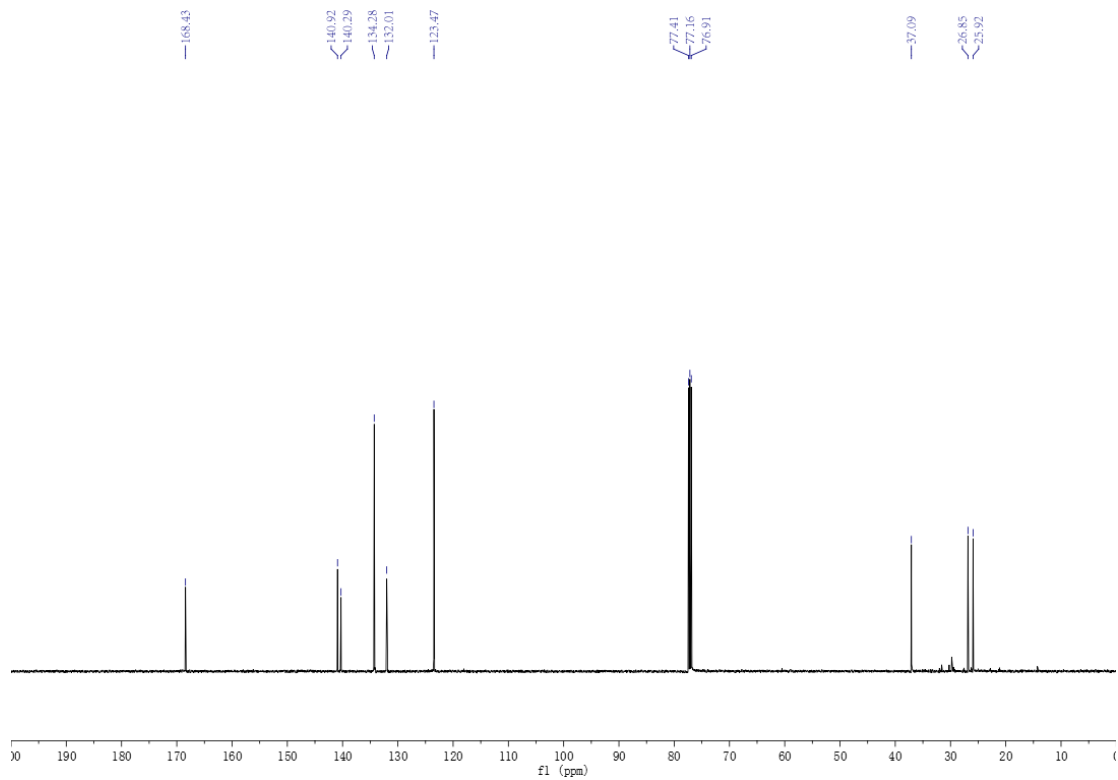

<sup>13</sup>C NMR of compound **158** (126 MHz, CDCl<sub>3</sub>)

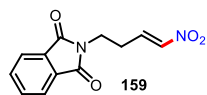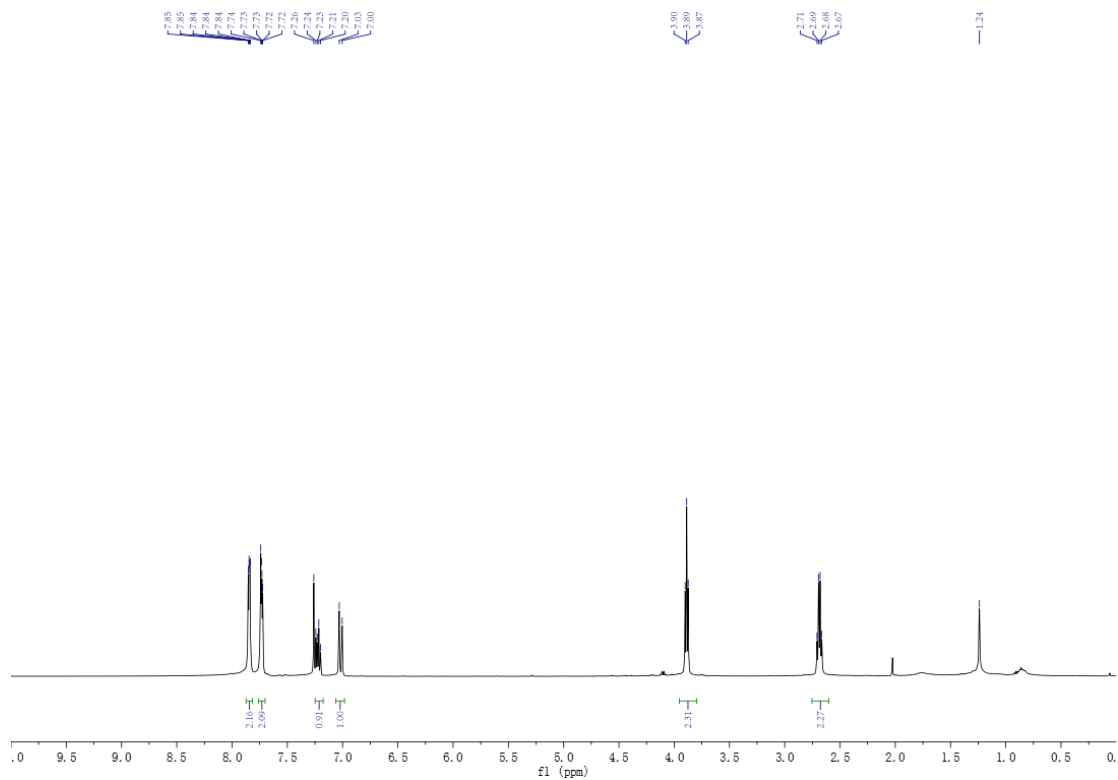

<sup>1</sup>H NMR of compound **159** (500 MHz, CDCl<sub>3</sub>)

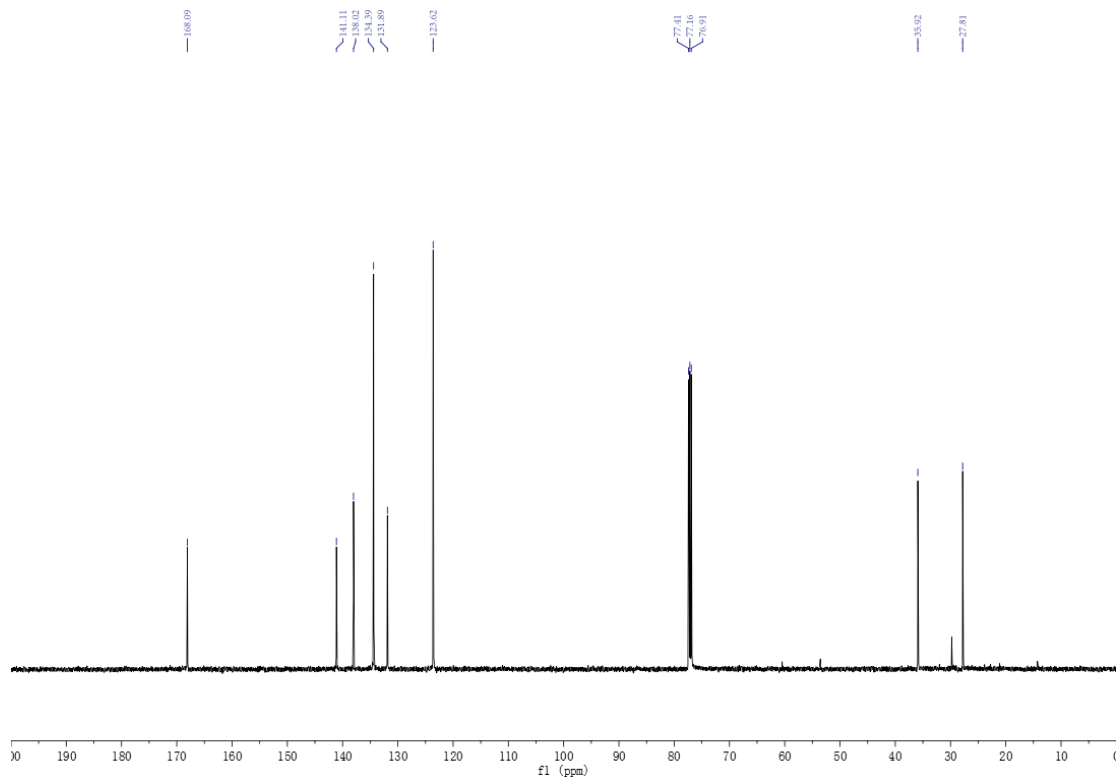

<sup>13</sup>C NMR of compound **159** (126 MHz, CDCl<sub>3</sub>)

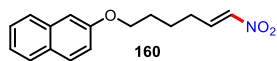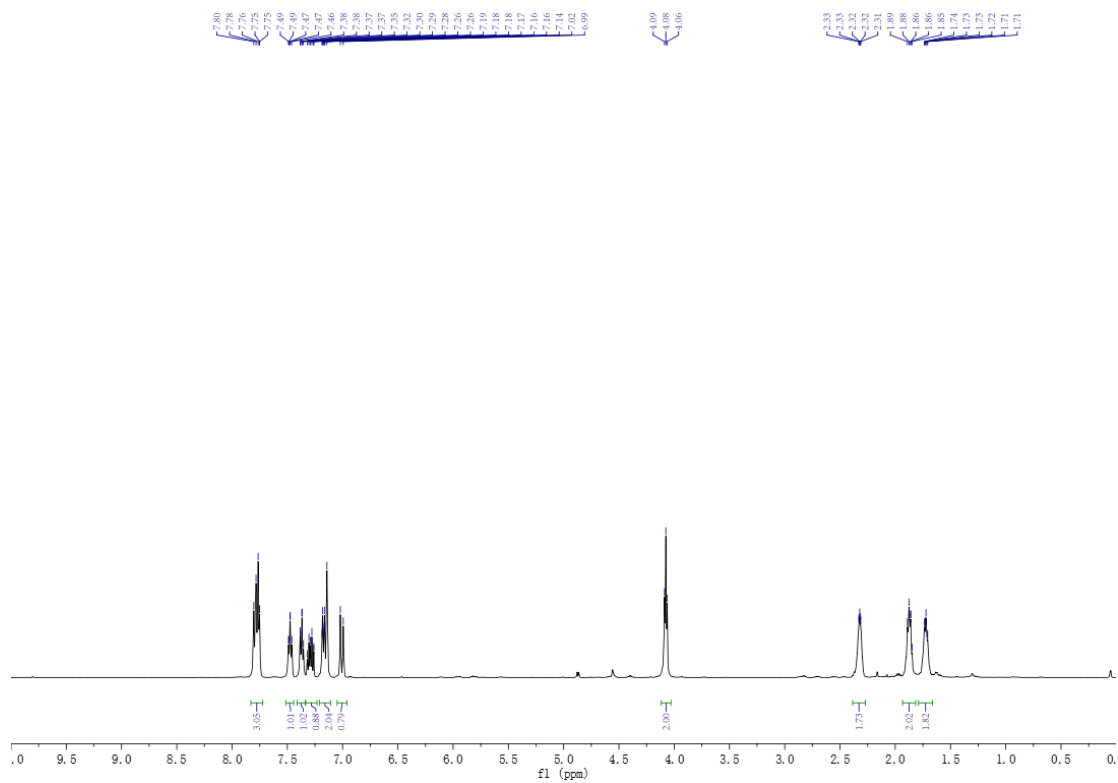

<sup>1</sup>H NMR of compound **160** (500 MHz, CDCl<sub>3</sub>)

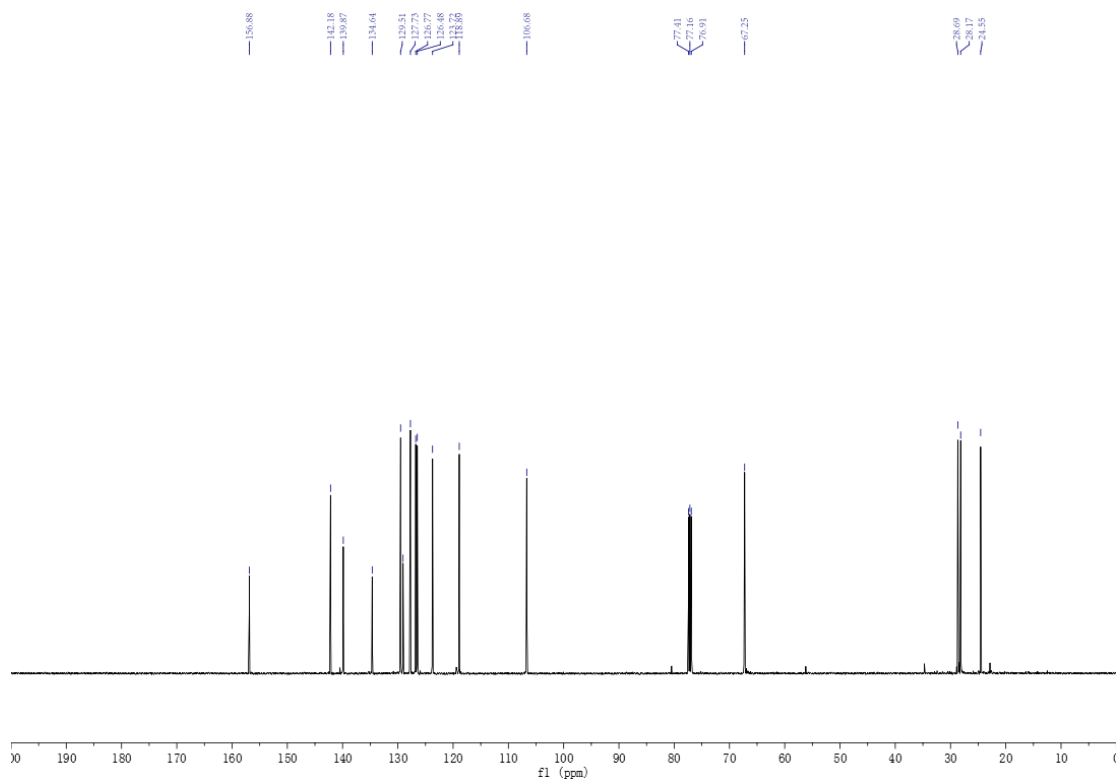

<sup>13</sup>C NMR of compound **160** (126 MHz, CDCl<sub>3</sub>)

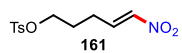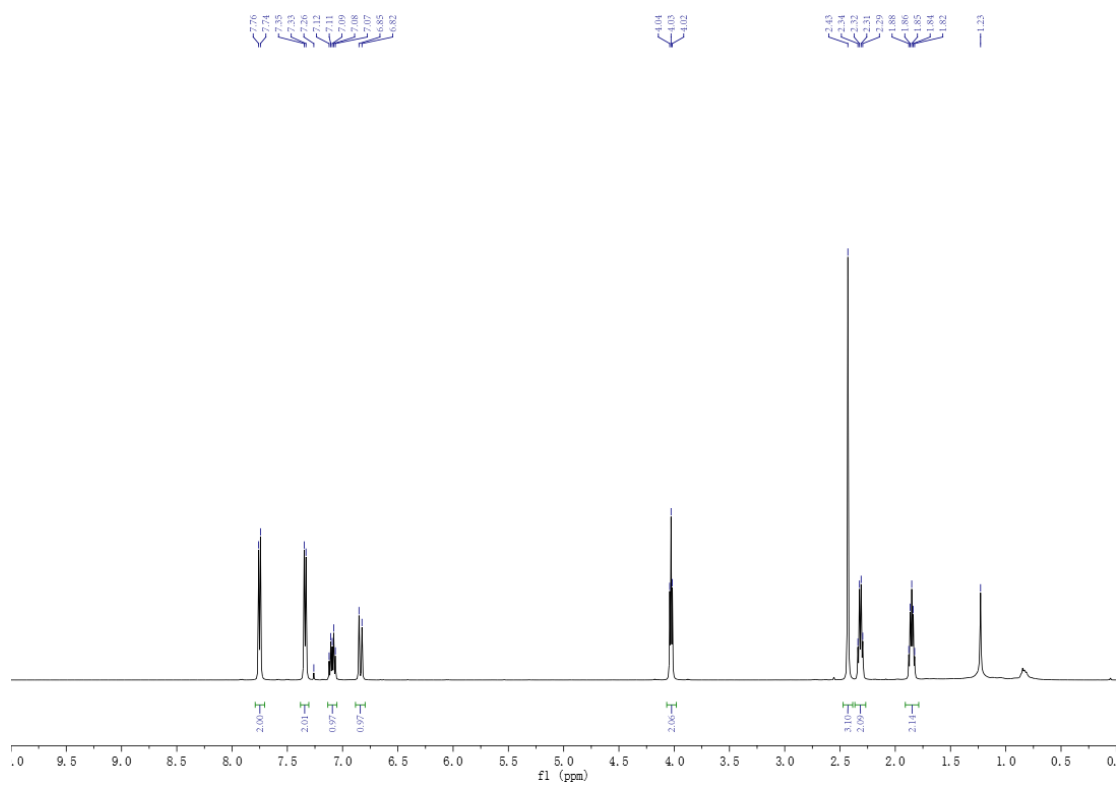

<sup>1</sup>H NMR of compound **161** (500 MHz, CDCl<sub>3</sub>)

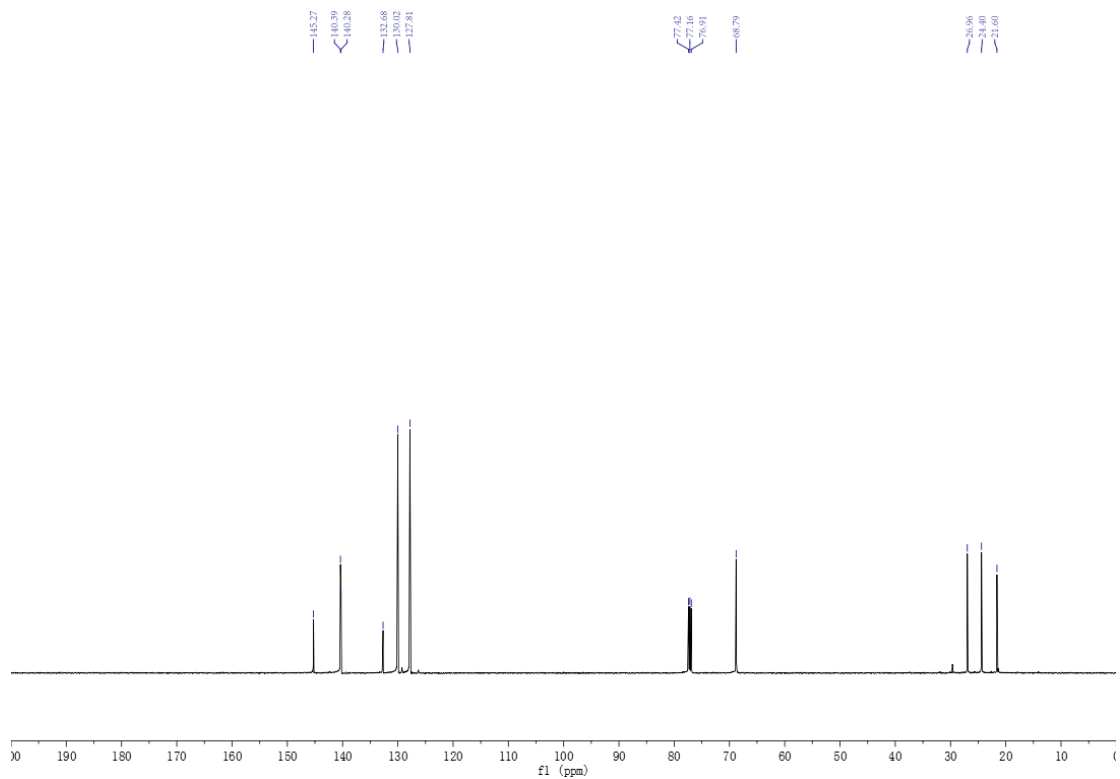

<sup>13</sup>C NMR of compound **161** (126 MHz, CDCl<sub>3</sub>)

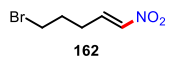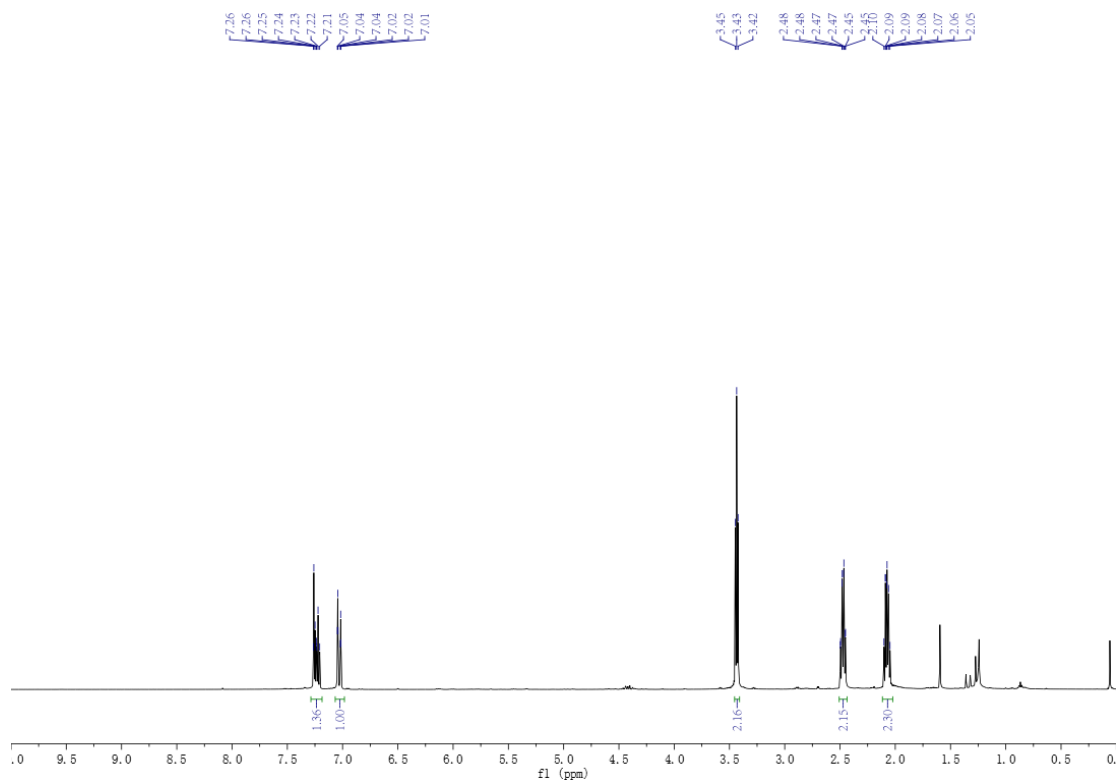

$^1\text{H}$  NMR of compound **162** (500 MHz,  $\text{CDCl}_3$ )

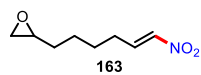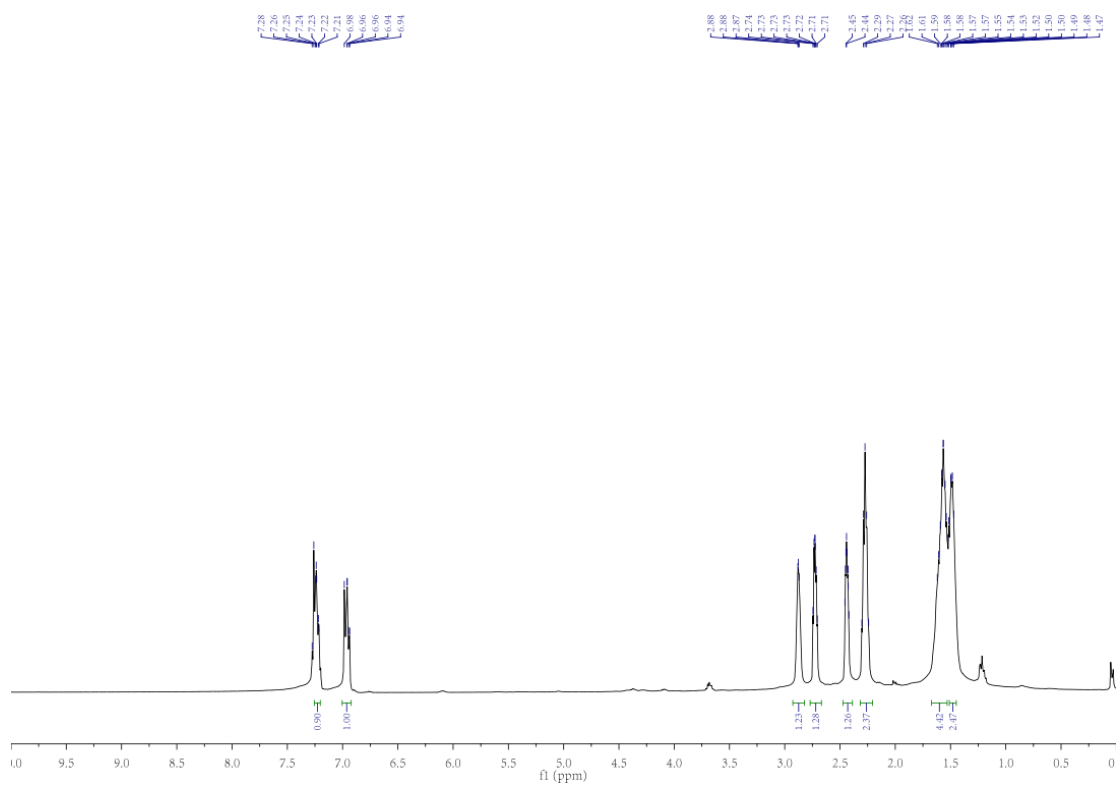

<sup>1</sup>H NMR of compound **163** (500 MHz, CDCl<sub>3</sub>)

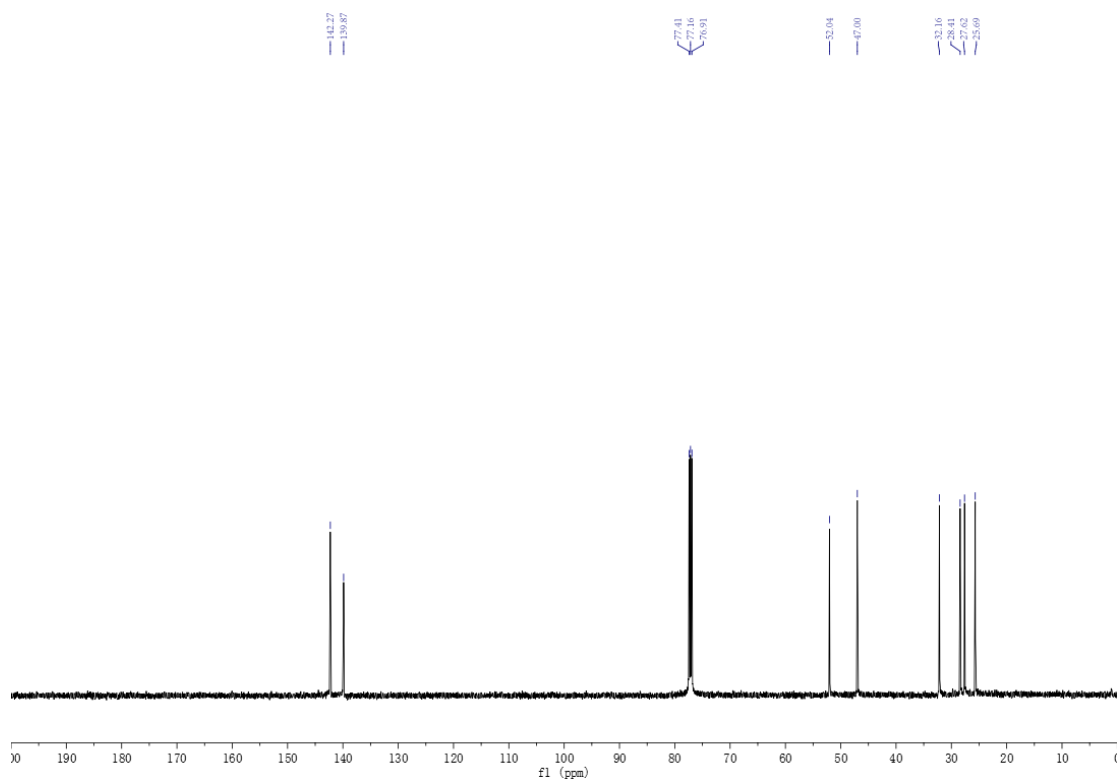

<sup>13</sup>C NMR of compound **163** (126 MHz, CDCl<sub>3</sub>)



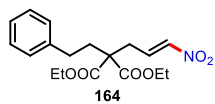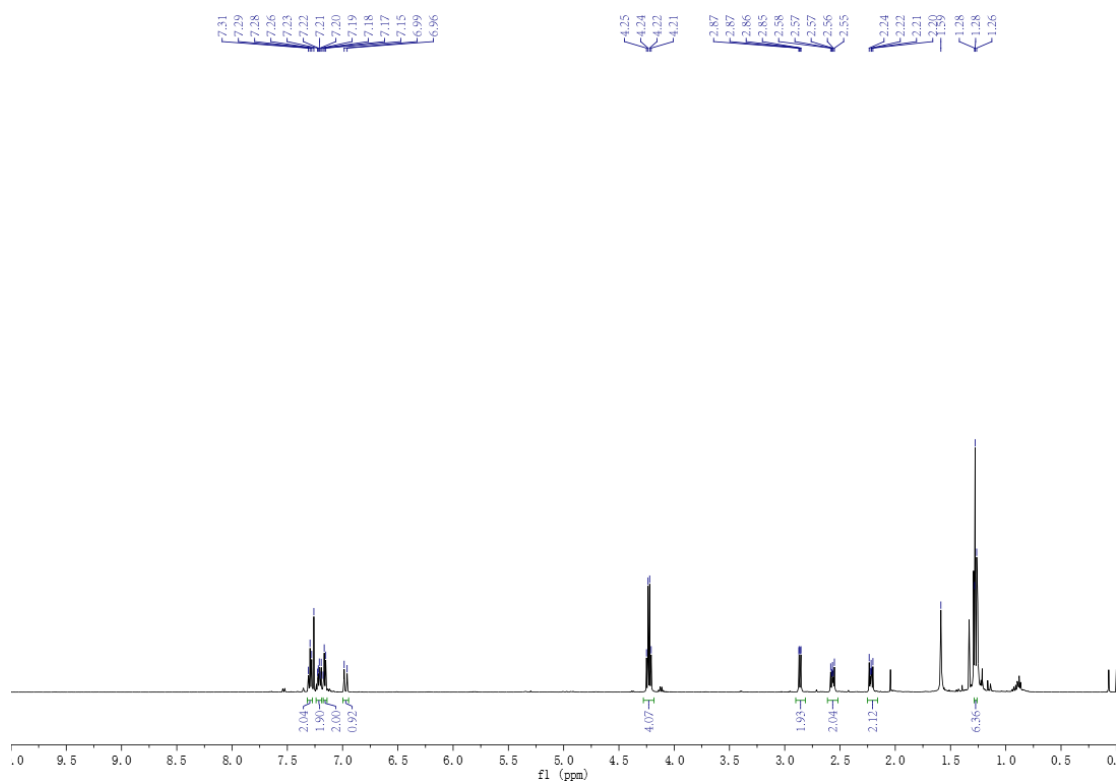

<sup>1</sup>H NMR of compound **164** (500 MHz, CDCl<sub>3</sub>)

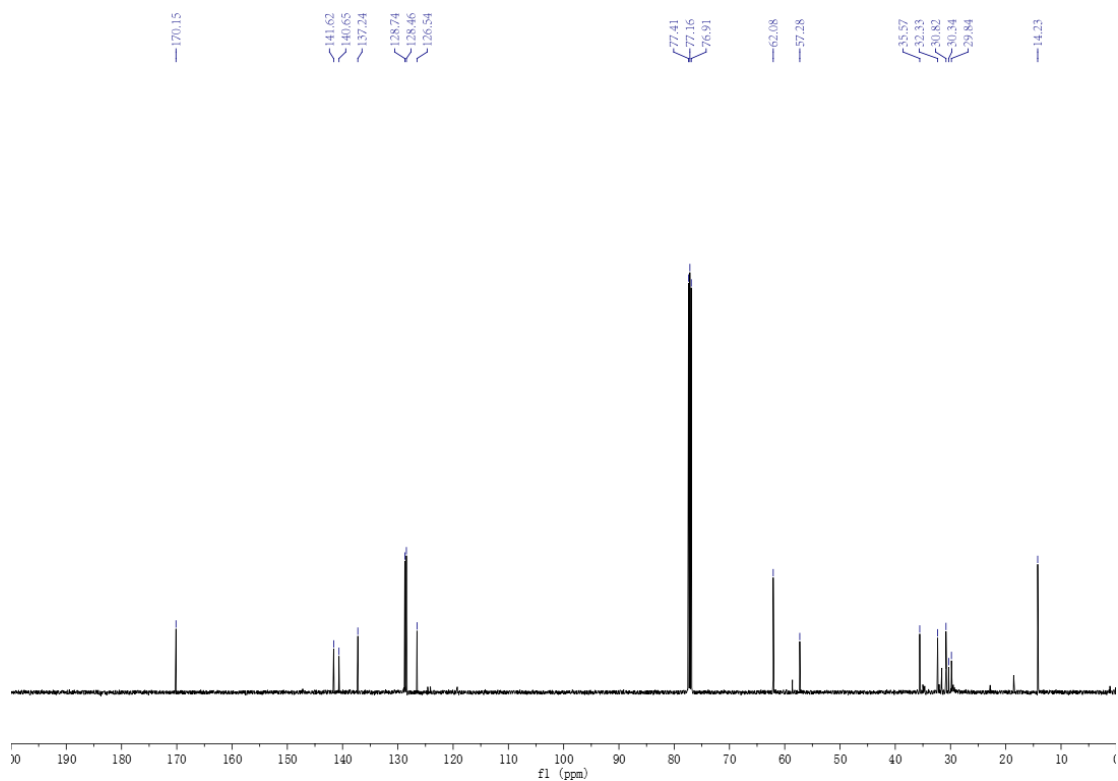

<sup>13</sup>C NMR of compound **164** (126 MHz, CDCl<sub>3</sub>)

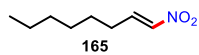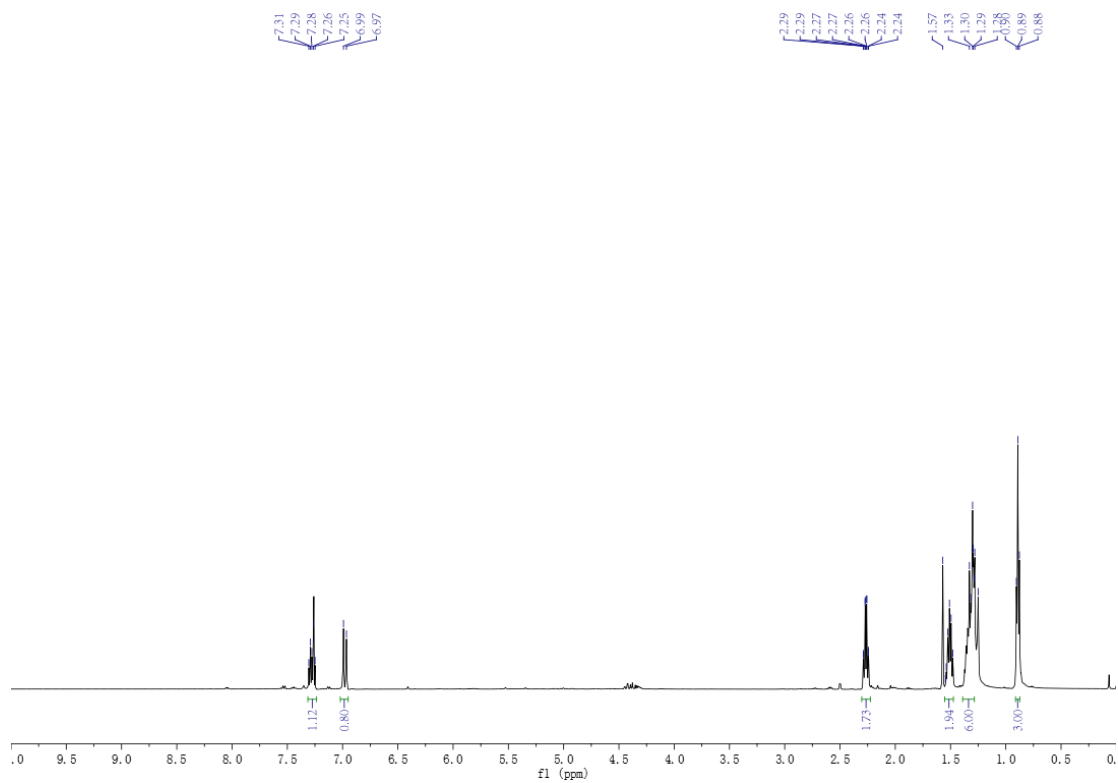

<sup>1</sup>H NMR of compound **165** (500 MHz, CDCl<sub>3</sub>)

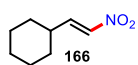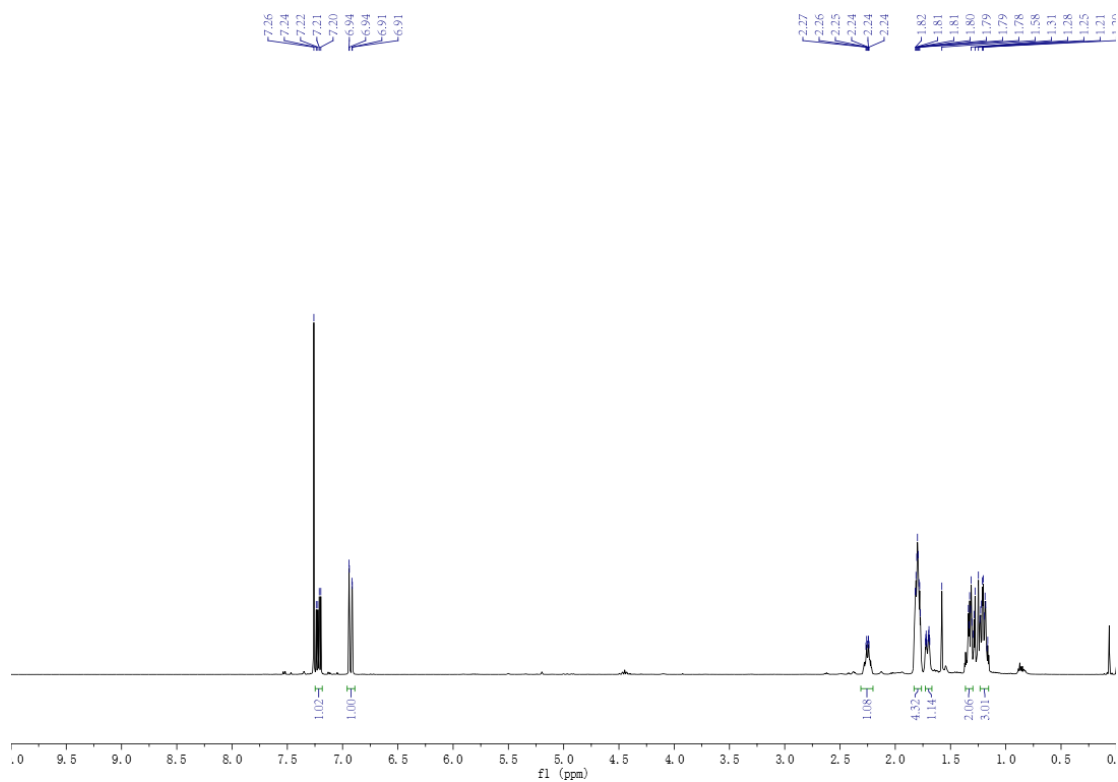

<sup>1</sup>H NMR of compound **166** (500 MHz, CDCl<sub>3</sub>)

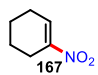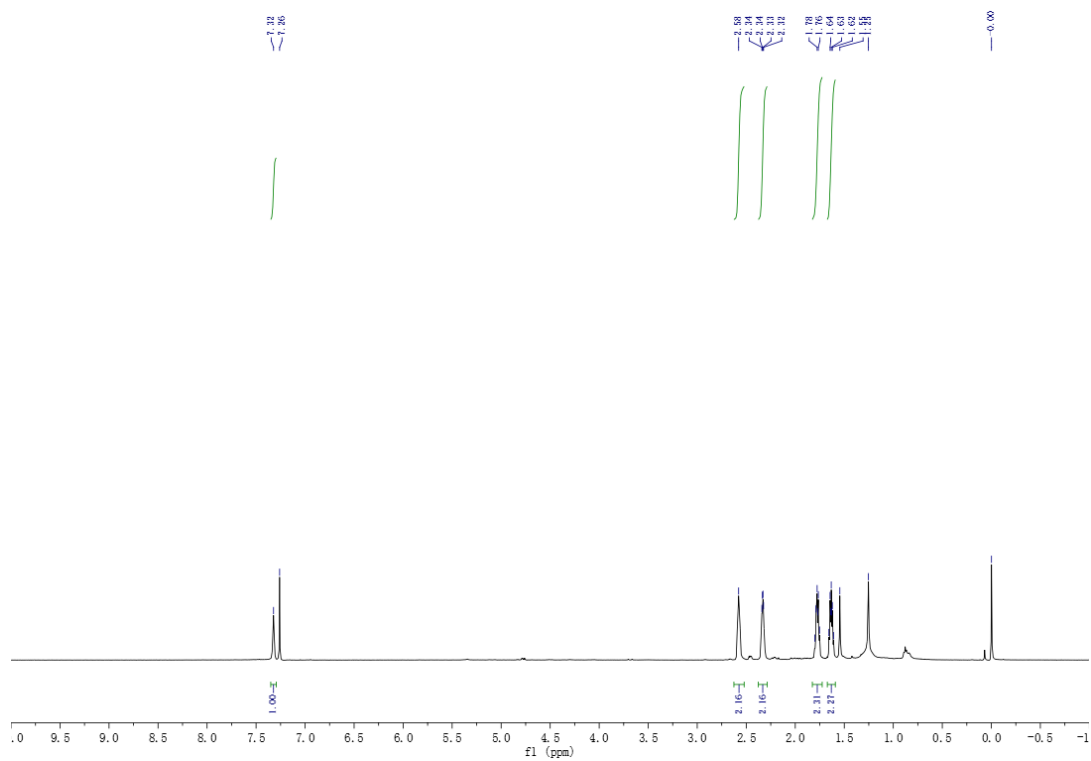

$^1\text{H}$  NMR of compound **167** (500 MHz,  $\text{CDCl}_3$ )

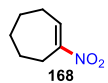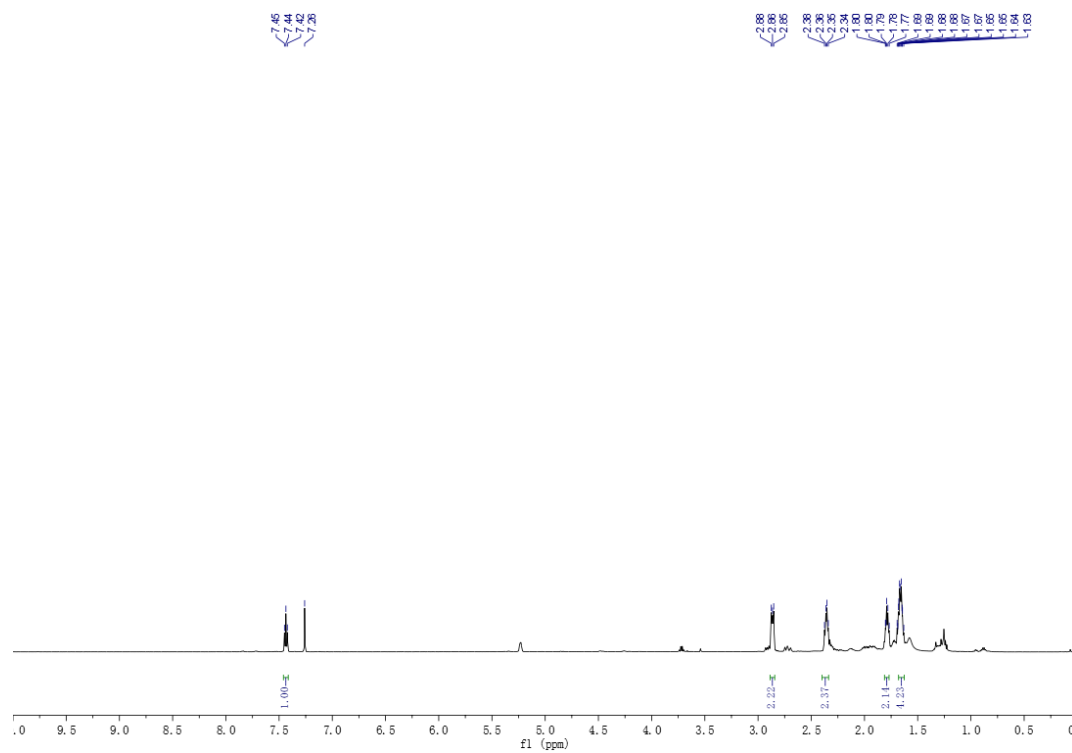

$^1\text{H}$  NMR of compound **168** (500 MHz,  $\text{CDCl}_3$ )

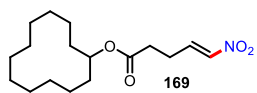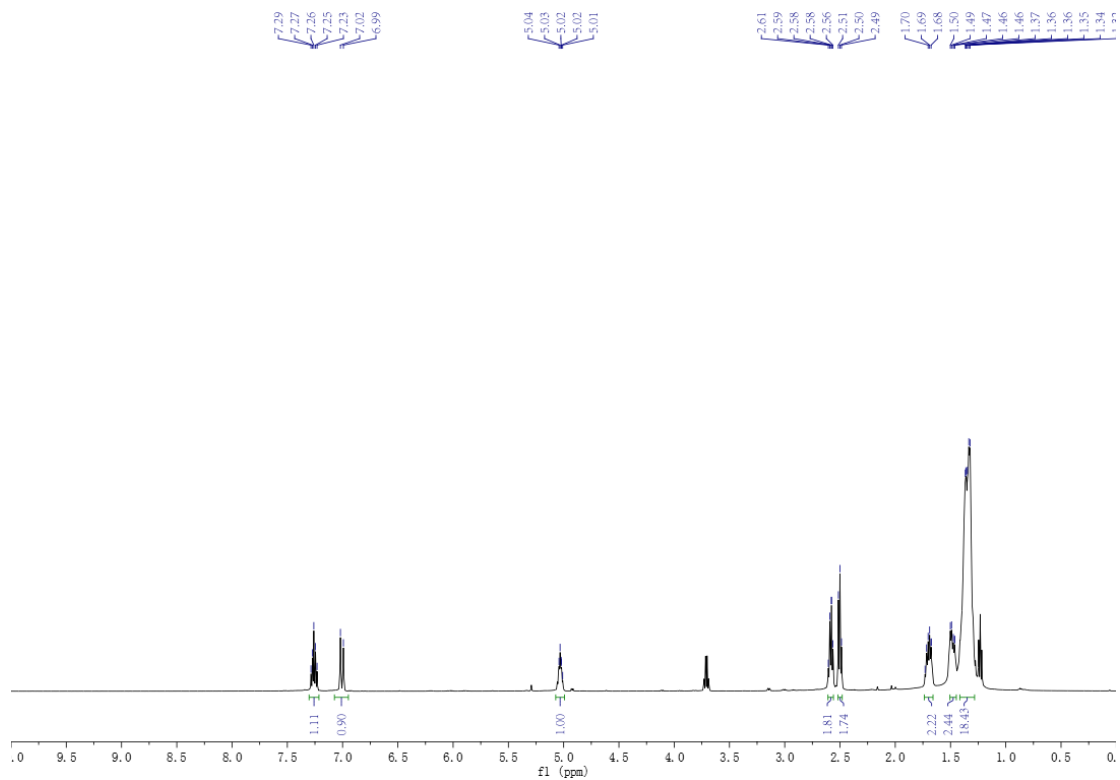

<sup>1</sup>H NMR of compound **169** (500 MHz, CDCl<sub>3</sub>)

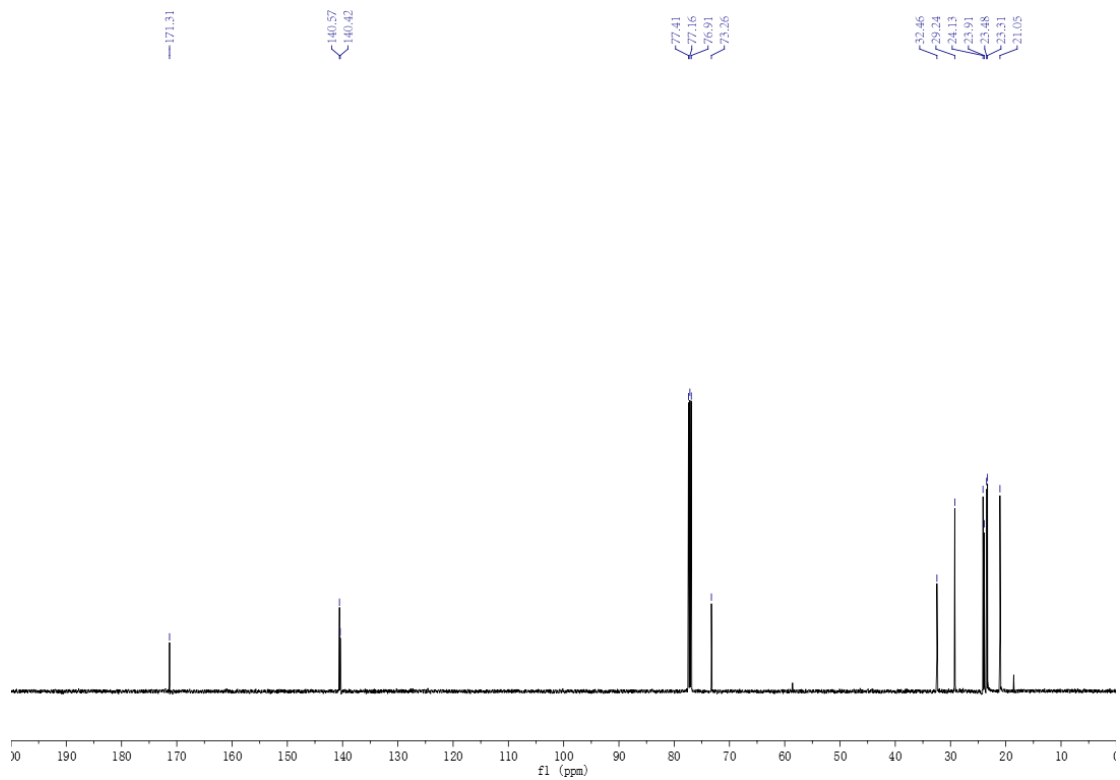

<sup>13</sup>C NMR of compound **169** (126 MHz, CDCl<sub>3</sub>)

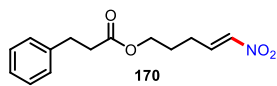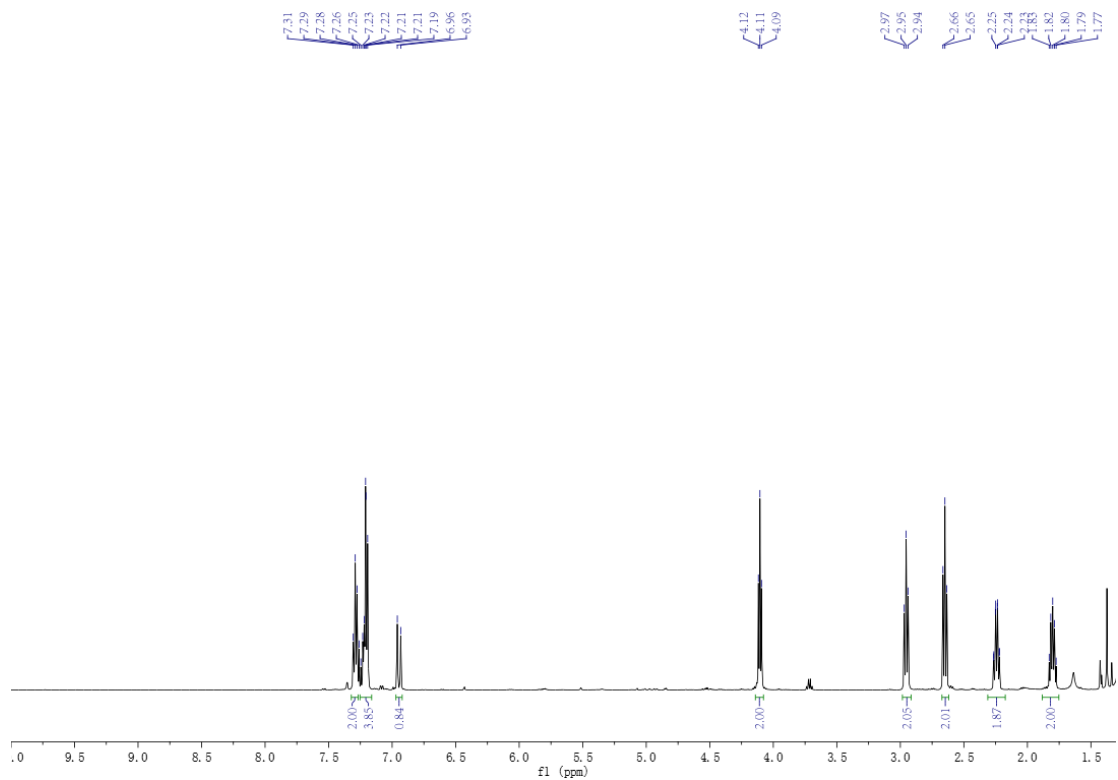

<sup>1</sup>H NMR of compound **170** (500 MHz, CDCl<sub>3</sub>)

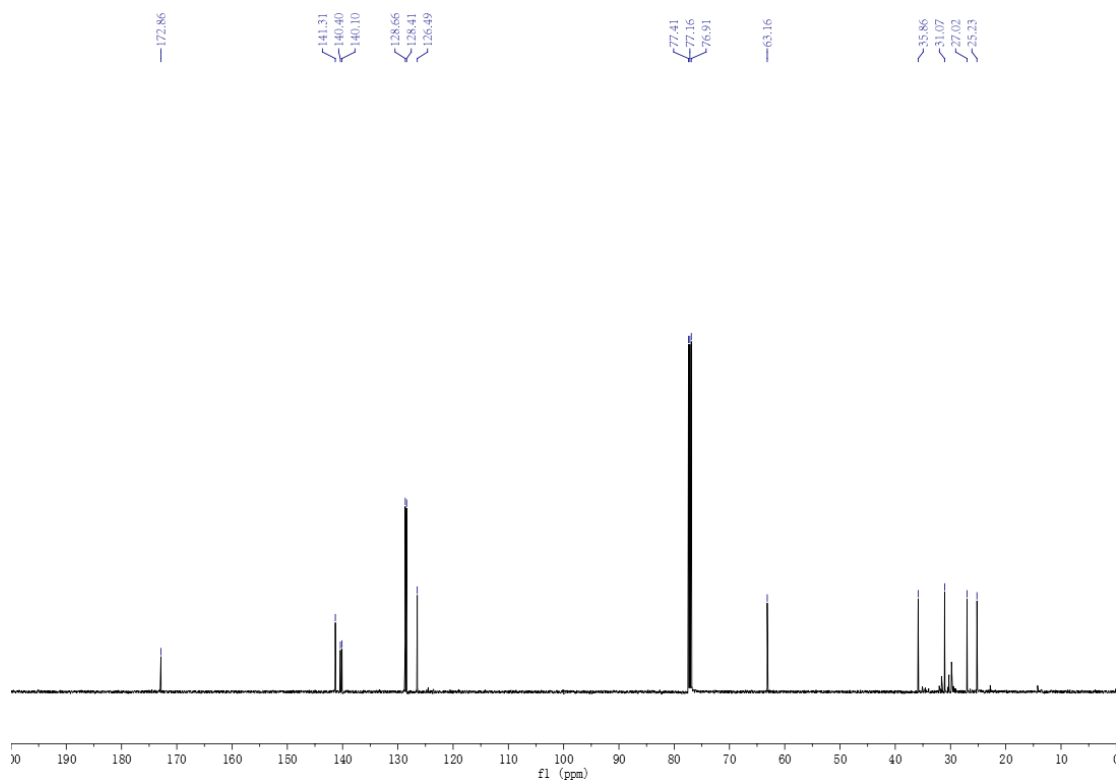

<sup>13</sup>C NMR of compound **170** (126 MHz, CDCl<sub>3</sub>)

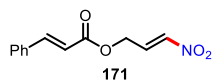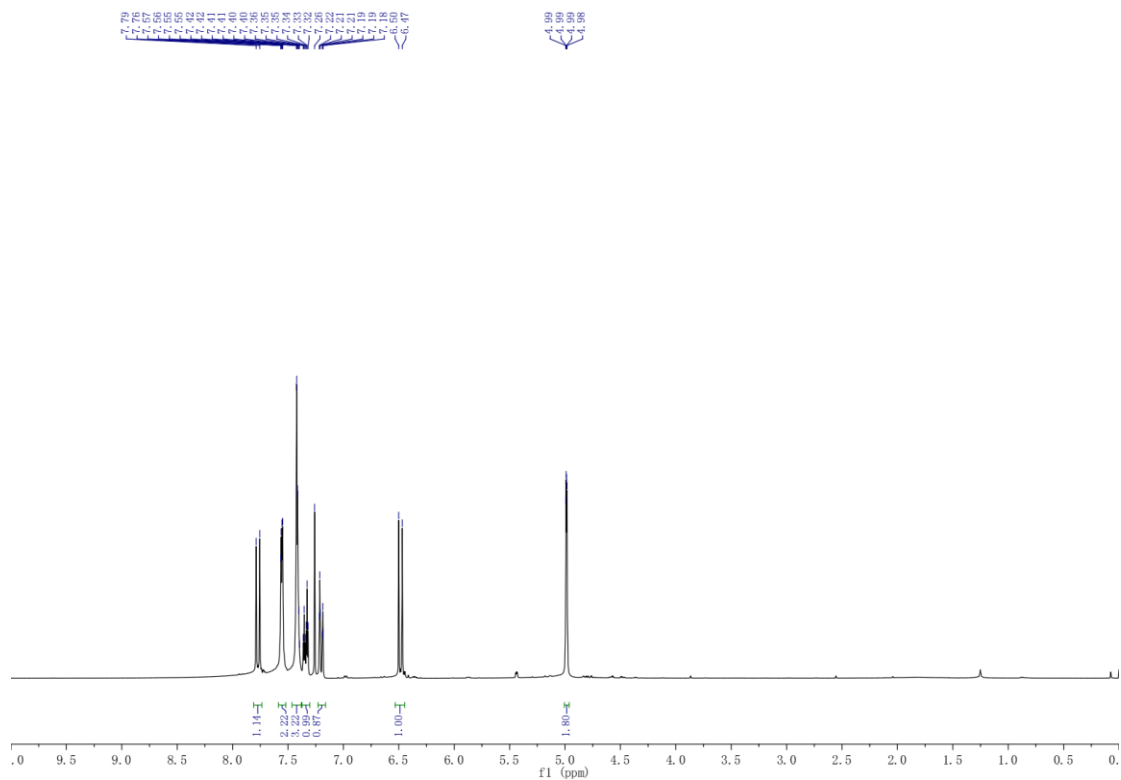

<sup>1</sup>H NMR of compound **171** (500 MHz, CDCl<sub>3</sub>)

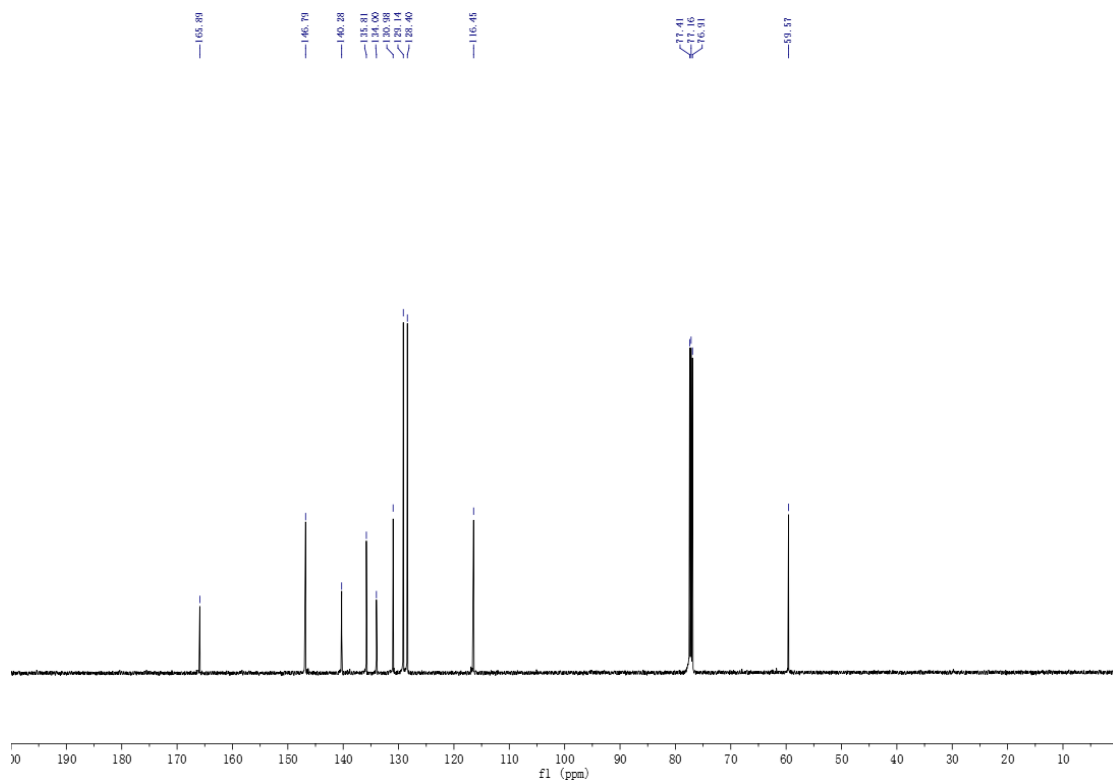

<sup>13</sup>C NMR of compound **171** (126 MHz, CDCl<sub>3</sub>)

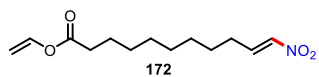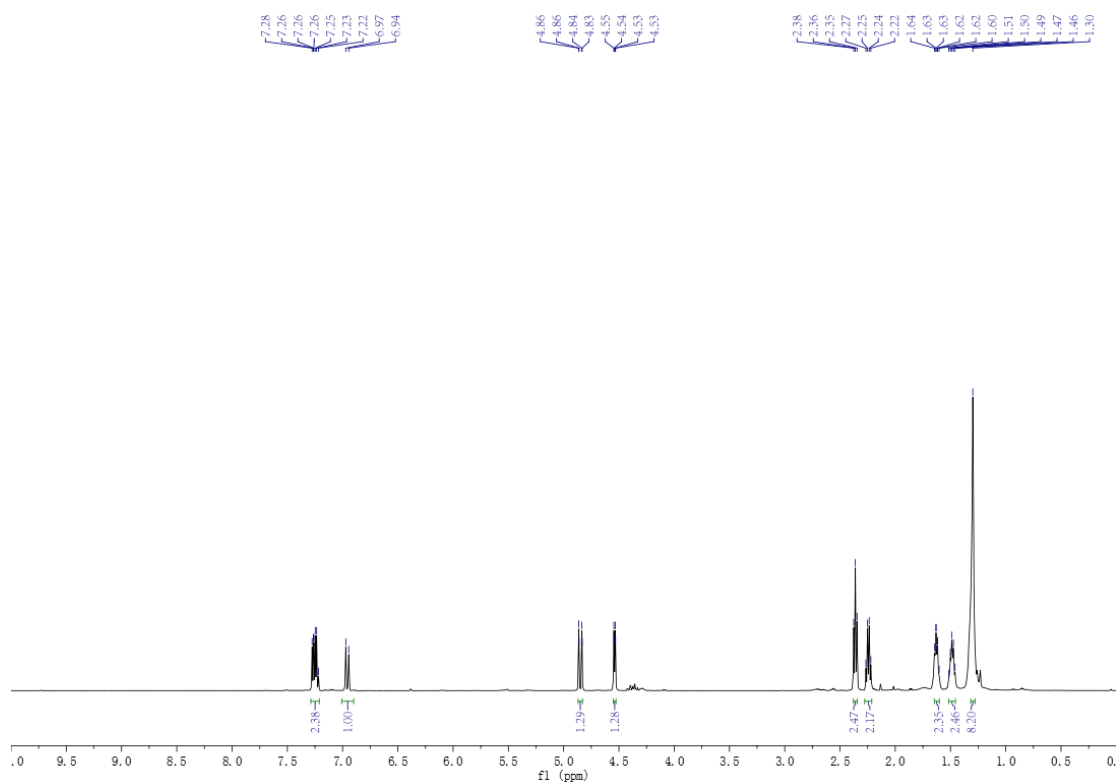

<sup>1</sup>H NMR of compound **172** (500 MHz, CDCl<sub>3</sub>)

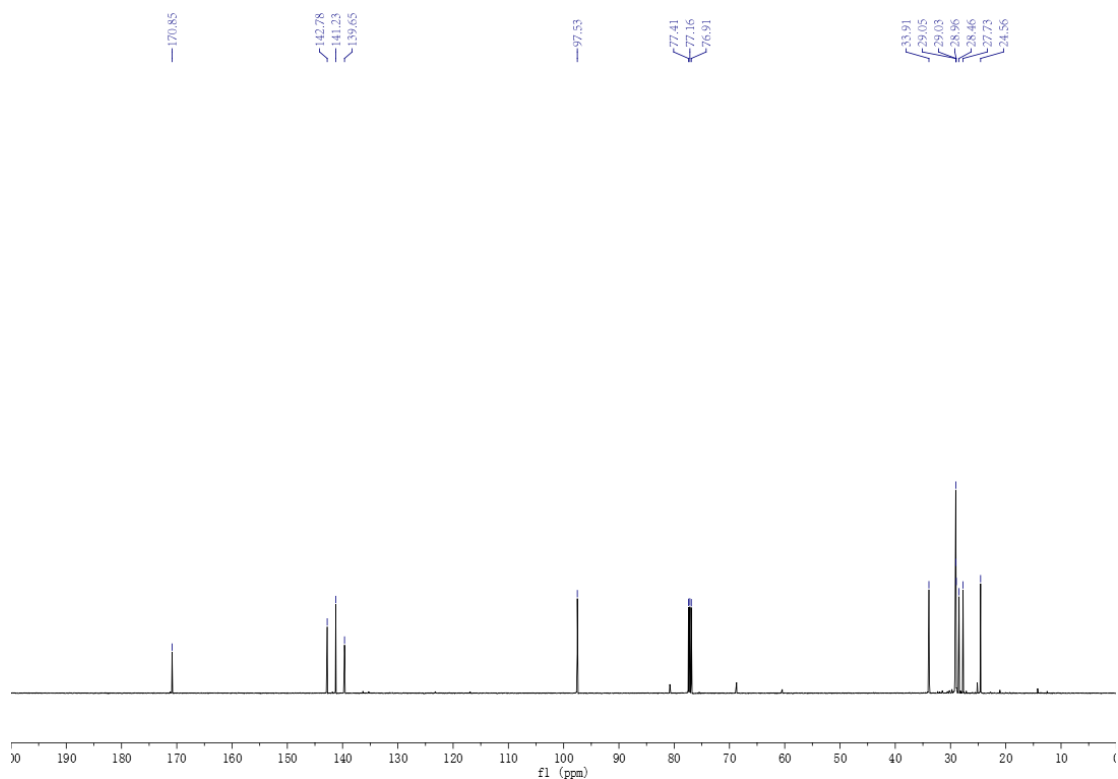

<sup>13</sup>C NMR of compound **172** (126 MHz, CDCl<sub>3</sub>)

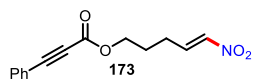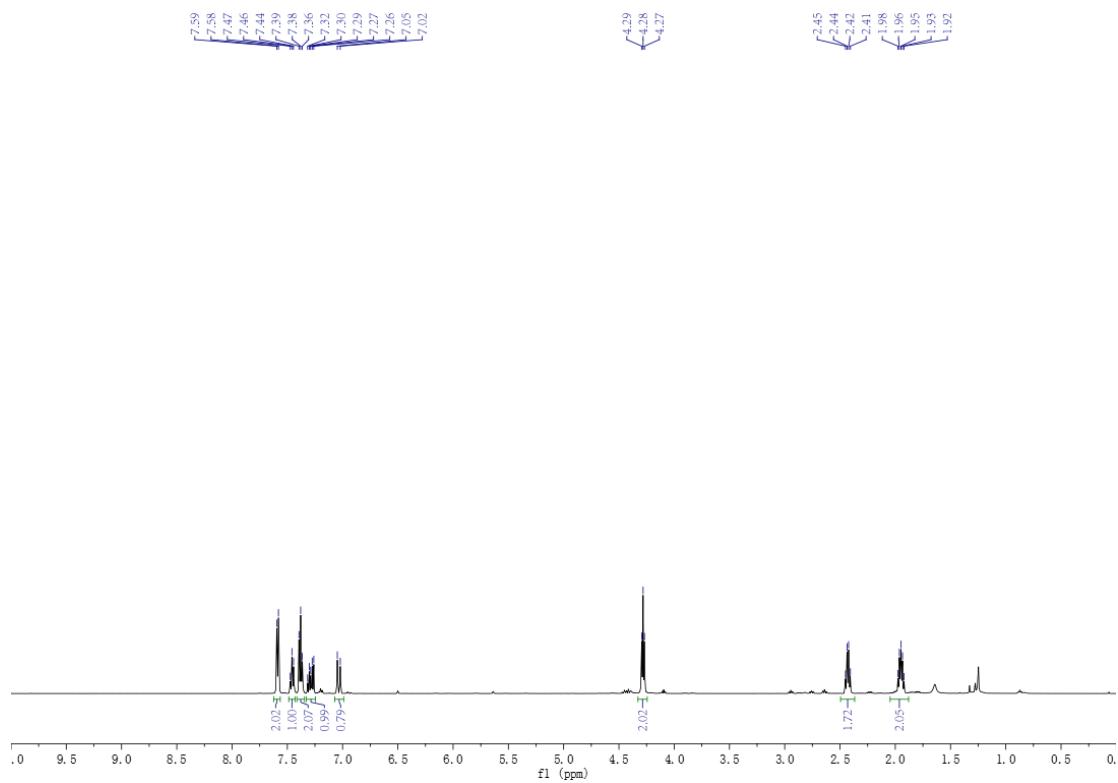

<sup>1</sup>H NMR of compound **173** (500 MHz, CDCl<sub>3</sub>)

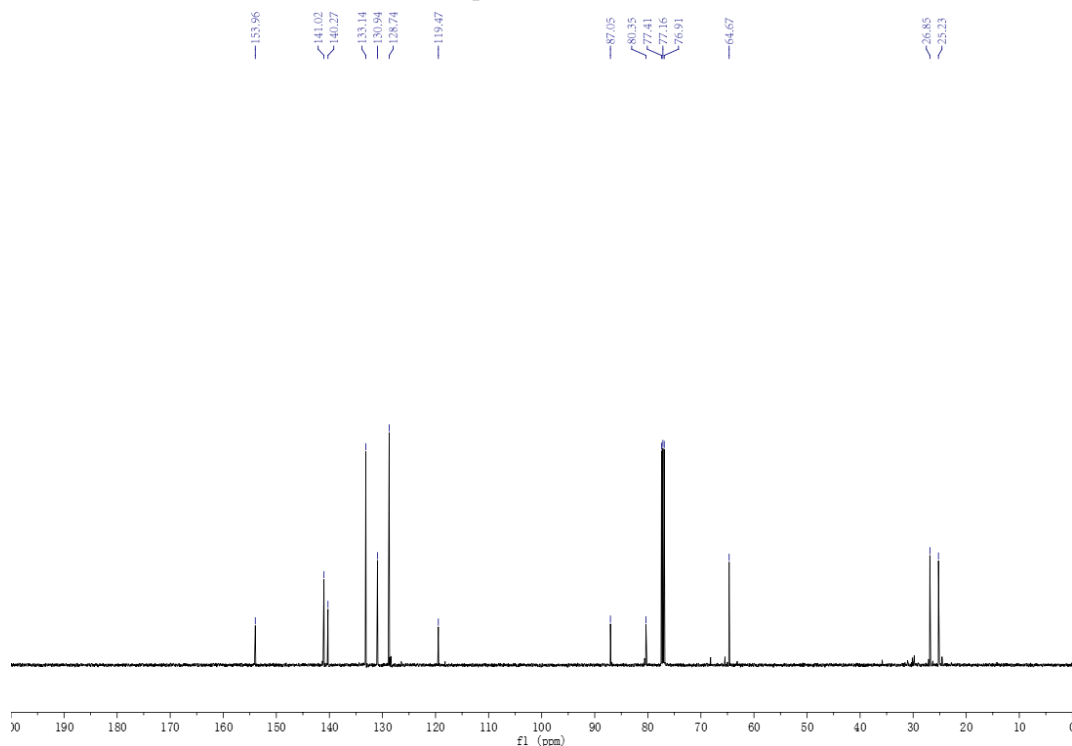

<sup>13</sup>C NMR of compound **173** (126 MHz, CDCl<sub>3</sub>)



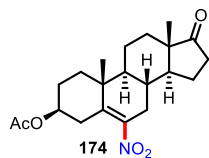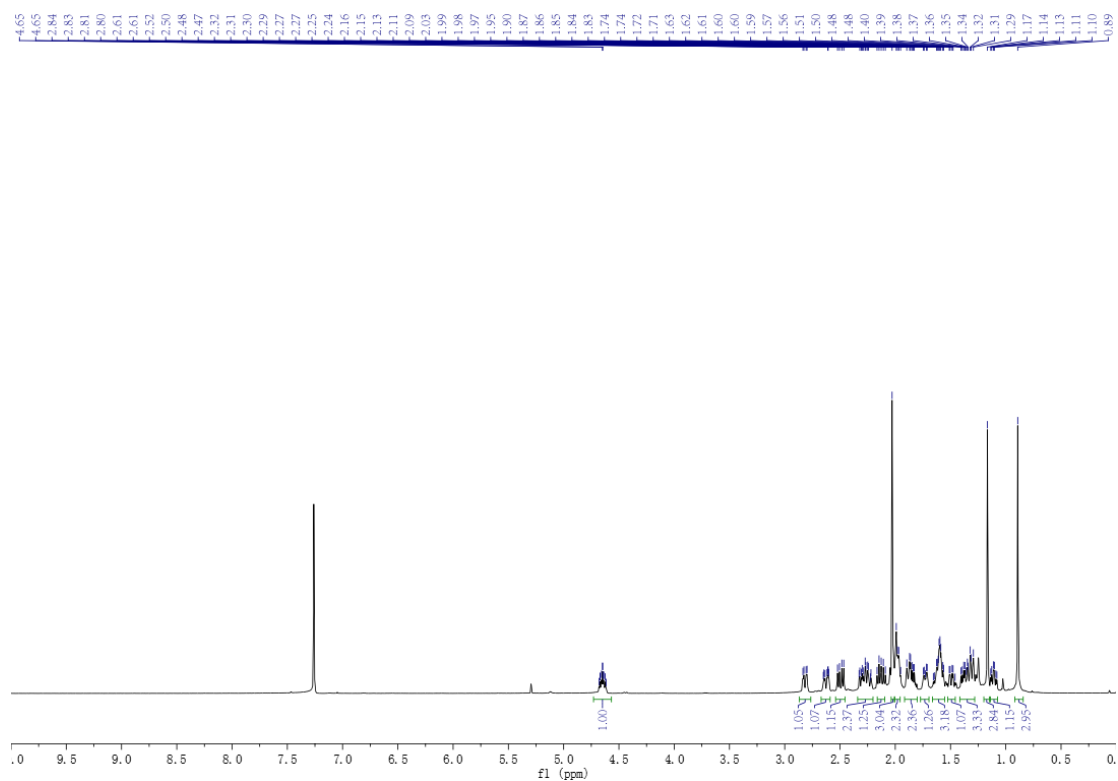

<sup>1</sup>H NMR of compound 174 (500 MHz, CDCl<sub>3</sub>)

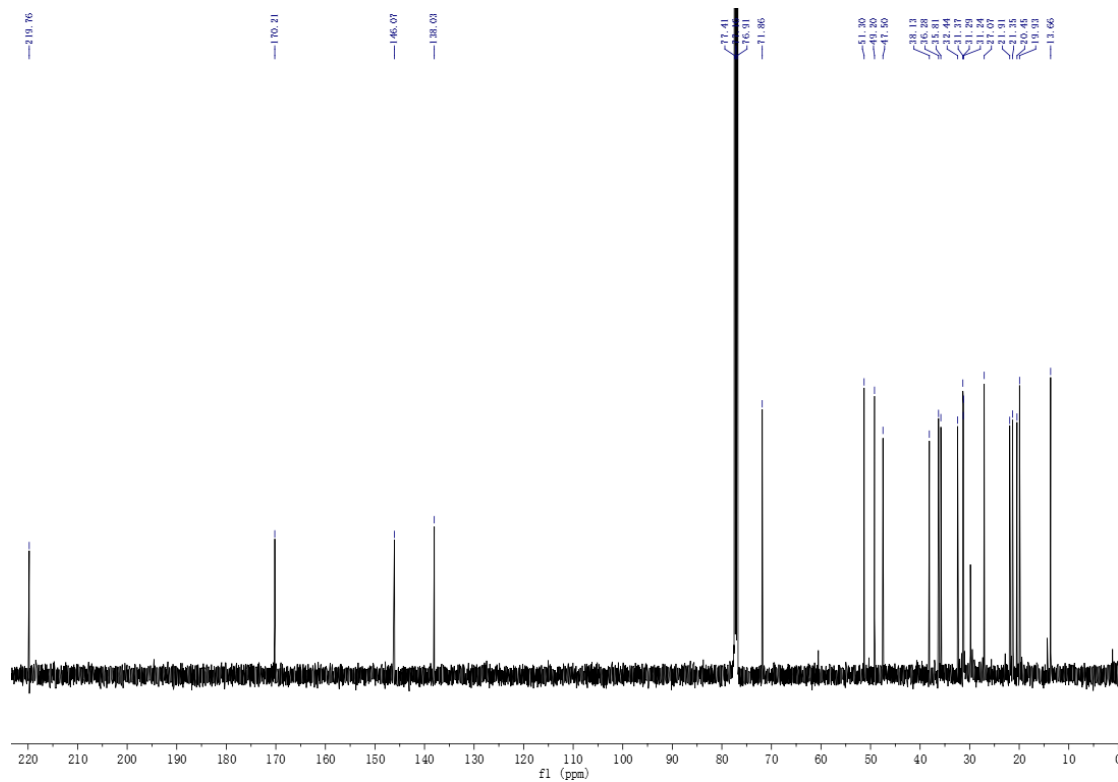

<sup>13</sup>C NMR of compound 174 (126 MHz, CDCl<sub>3</sub>)

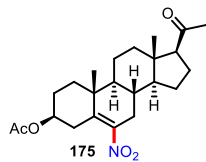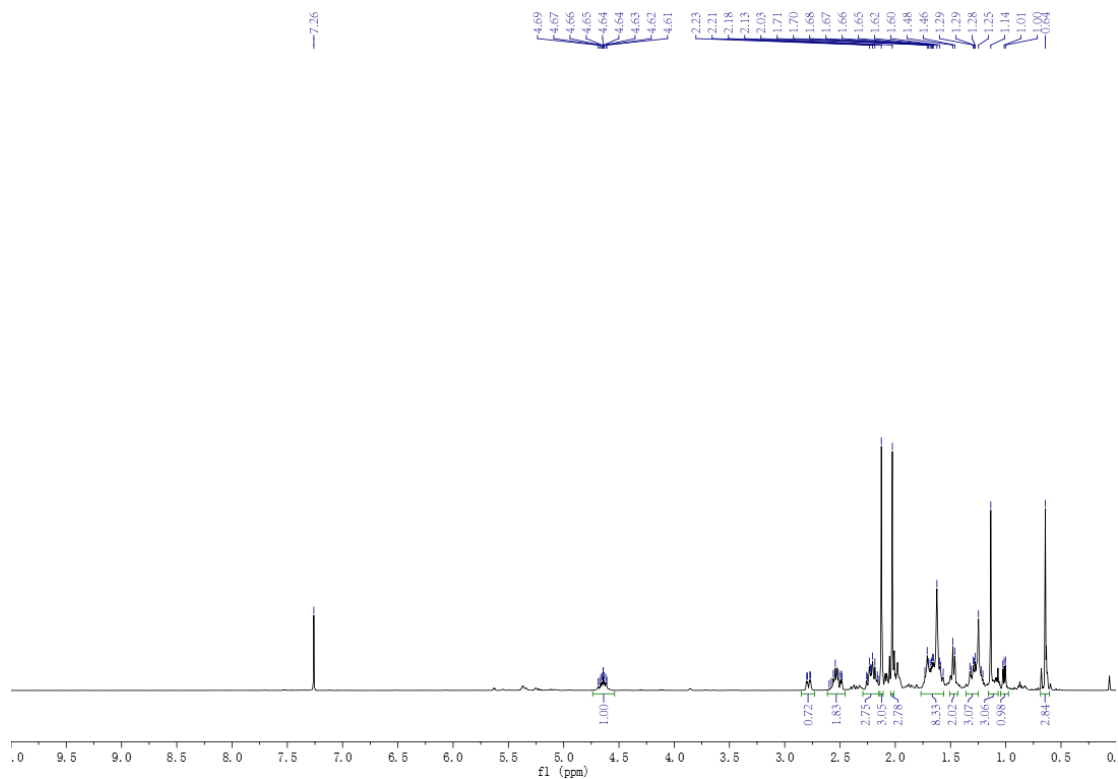

<sup>1</sup>H NMR of compound **175** (500 MHz, CDCl<sub>3</sub>)

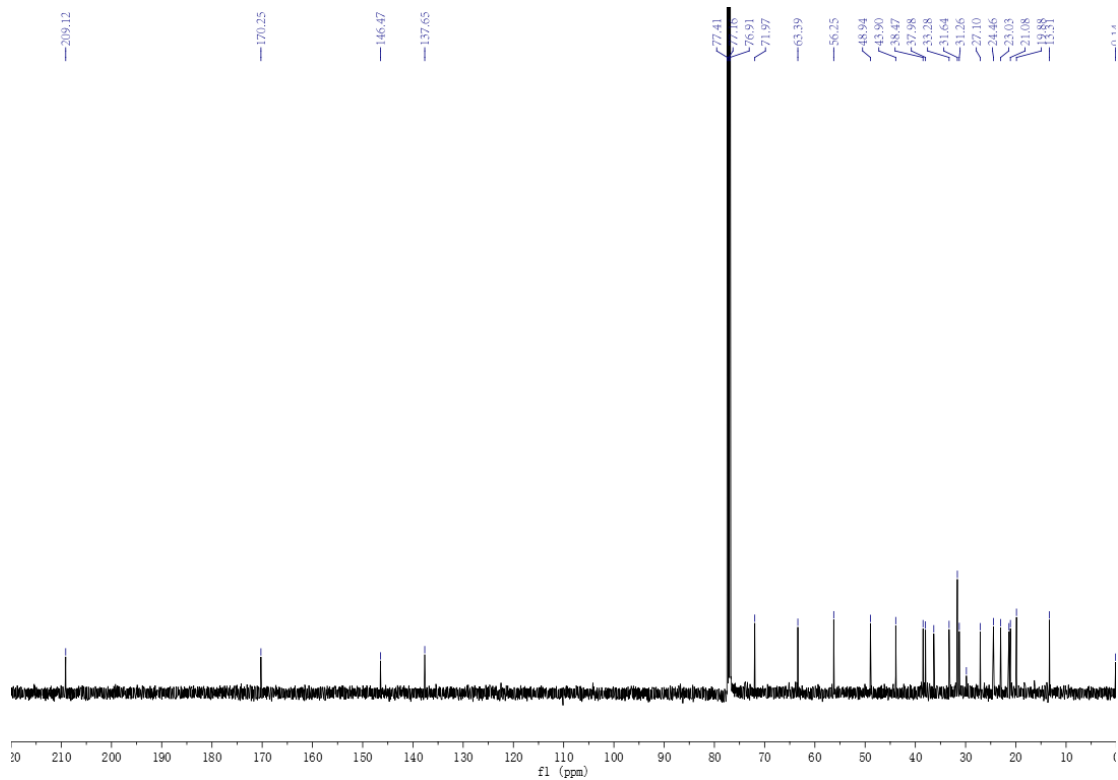

<sup>13</sup>C NMR of compound **175** (126 MHz, CDCl<sub>3</sub>)

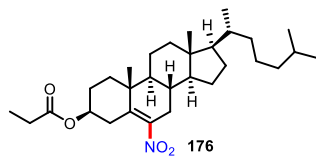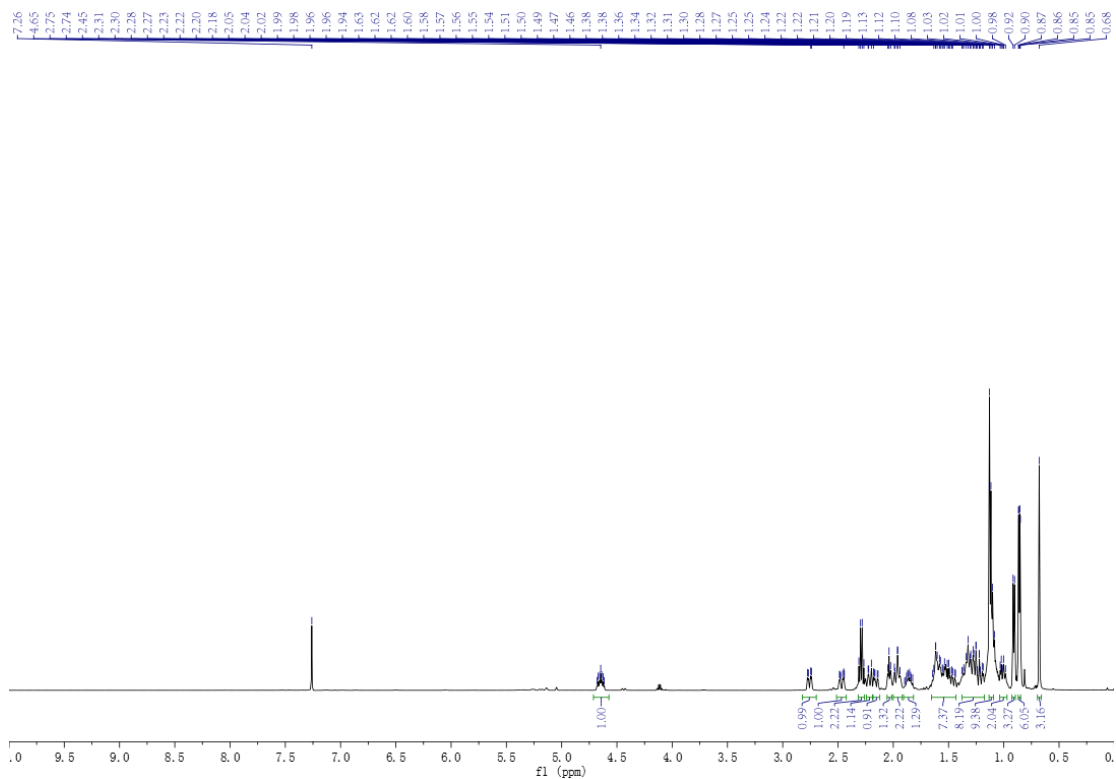

<sup>1</sup>H NMR of compound **176** (500 MHz, CDCl<sub>3</sub>)

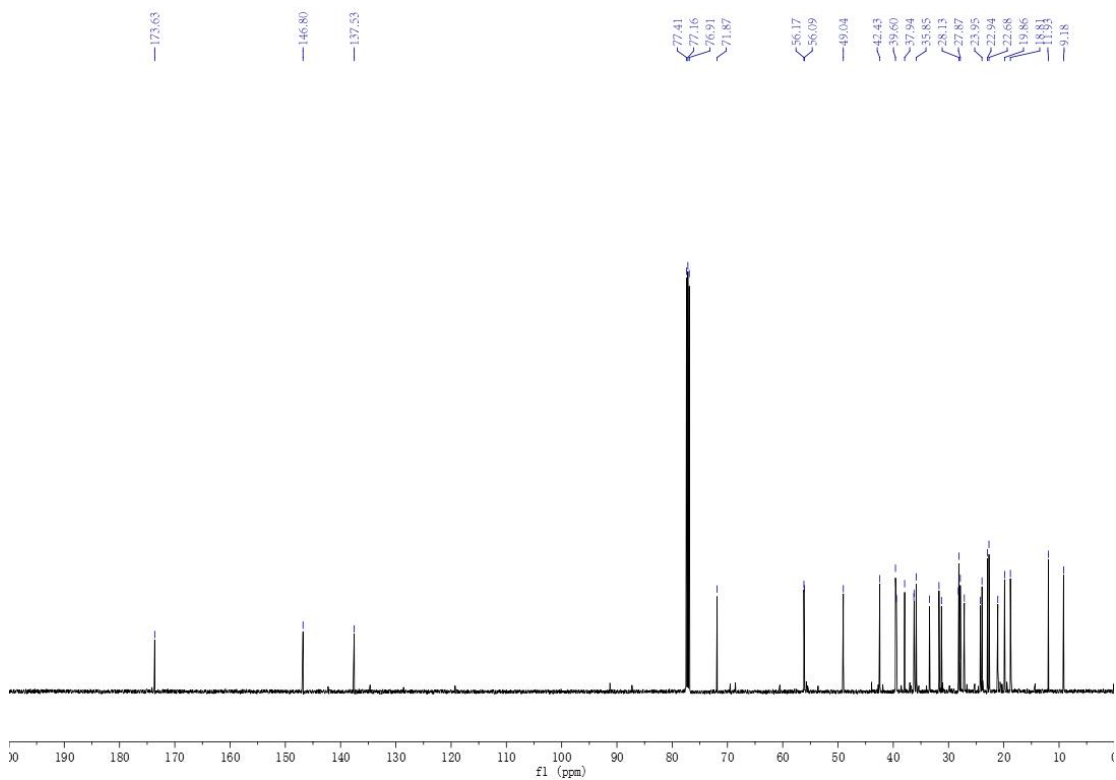

<sup>13</sup>C NMR of compound **176** (126 MHz, CDCl<sub>3</sub>)

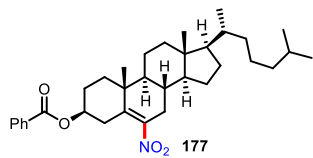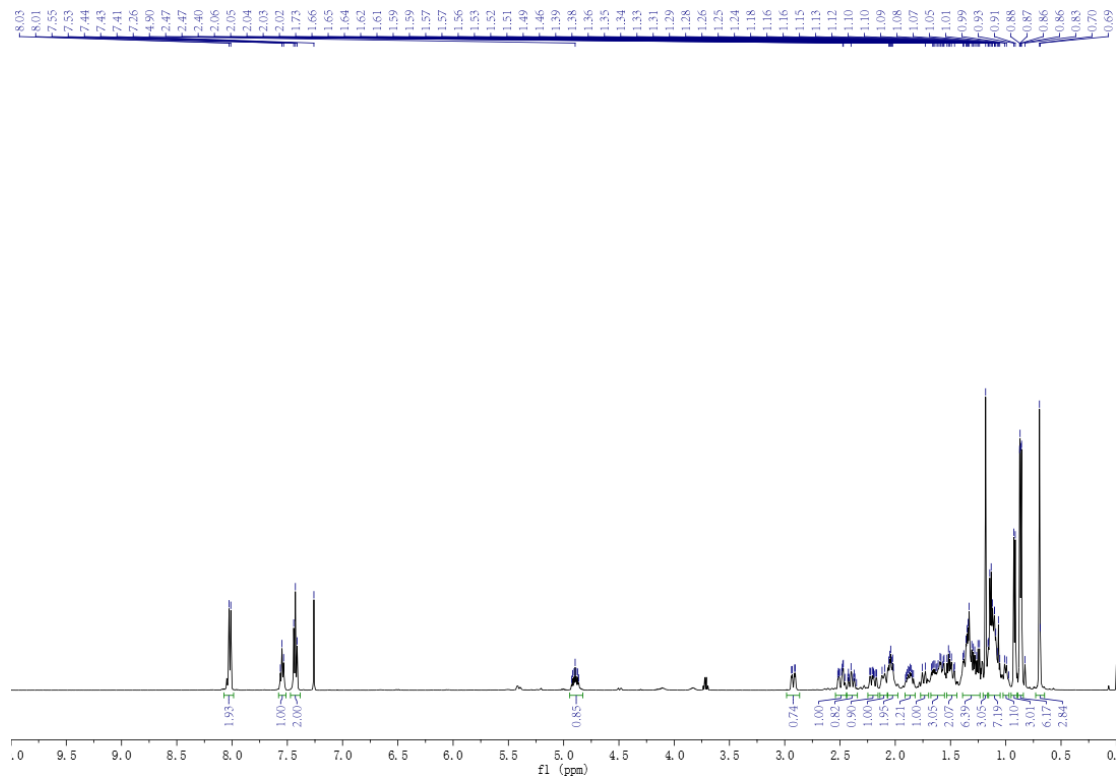

<sup>1</sup>H NMR of compound 177 (500 MHz, CDCl<sub>3</sub>)

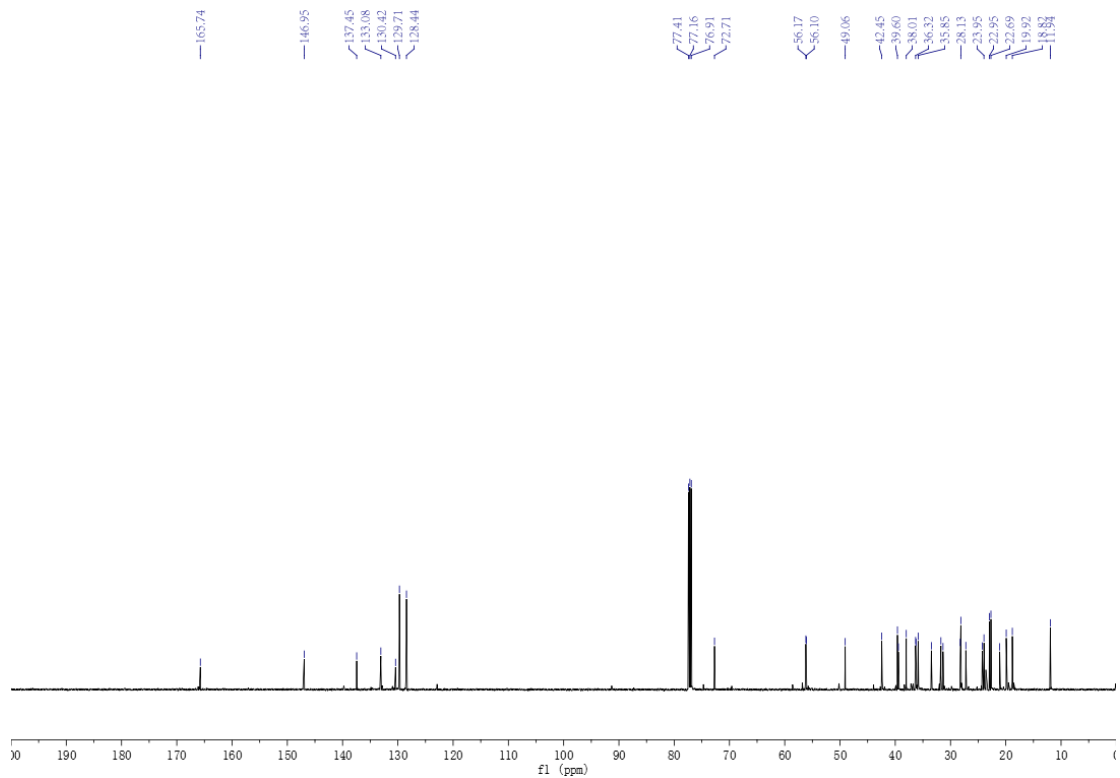

<sup>13</sup>C NMR of compound 177 (126 MHz, CDCl<sub>3</sub>)





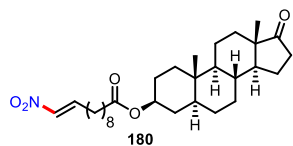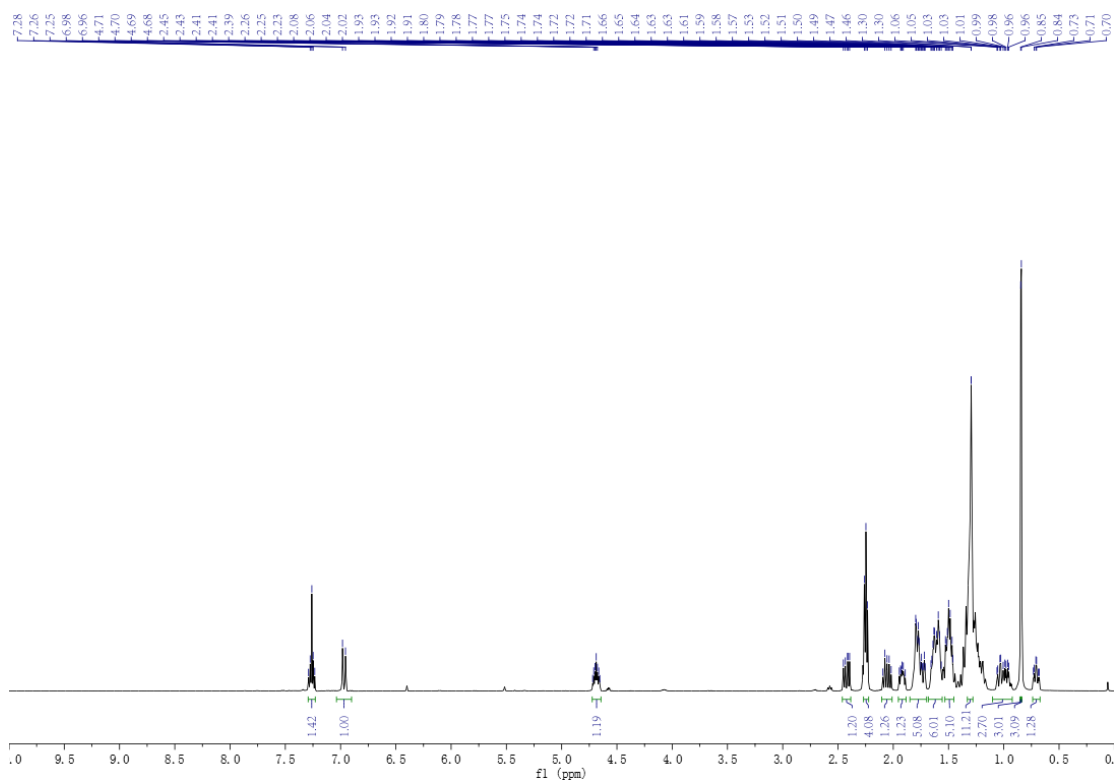

<sup>1</sup>H NMR of compound **180** (500 MHz, CDCl<sub>3</sub>)

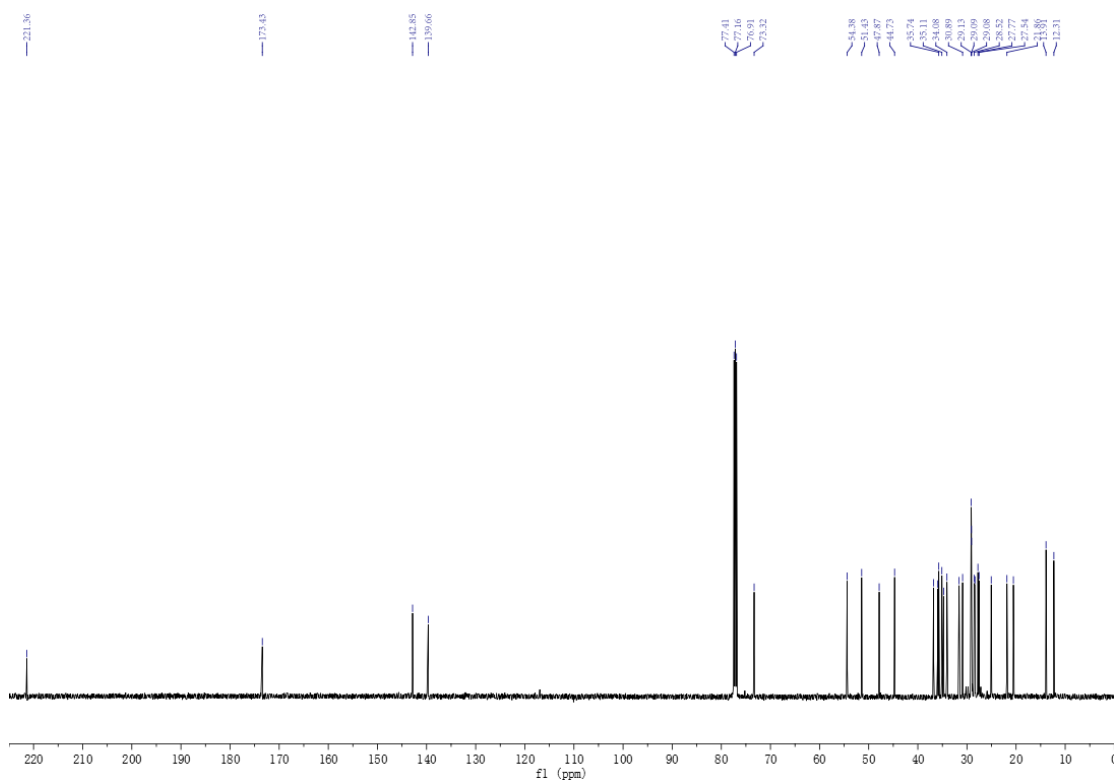

<sup>13</sup>C NMR of compound **180** (126 MHz, CDCl<sub>3</sub>)







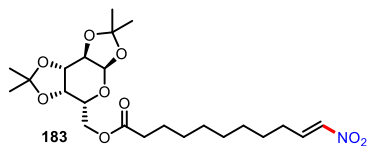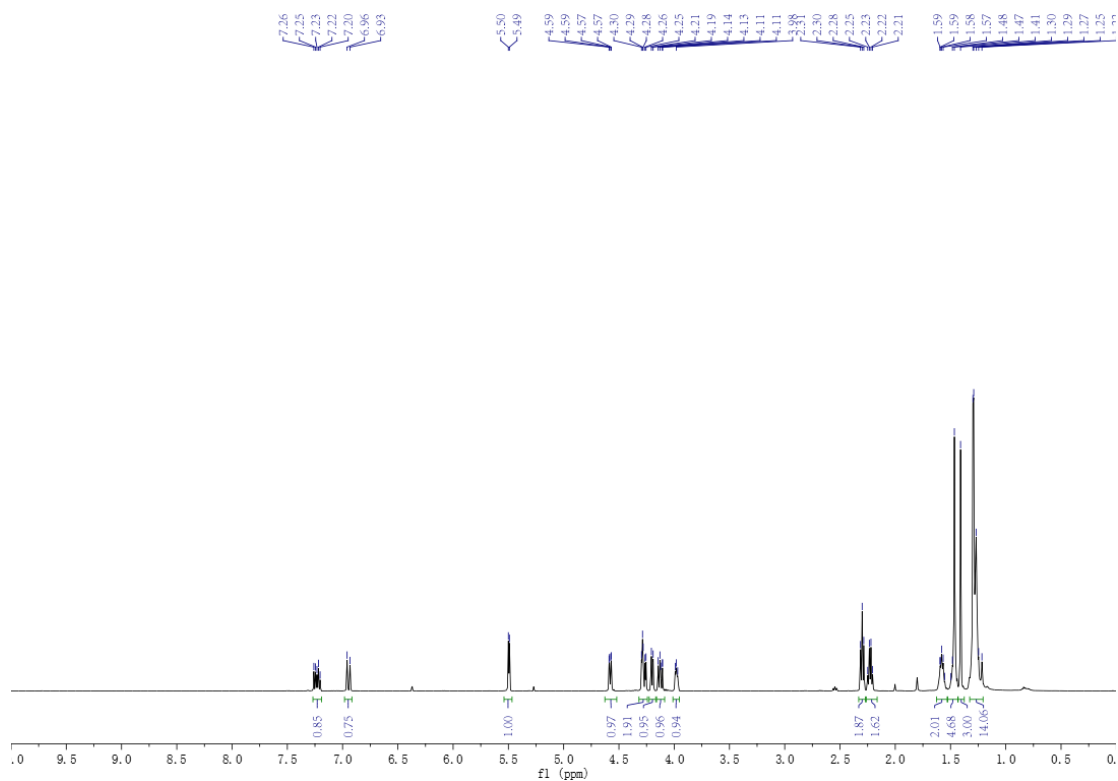

<sup>1</sup>H NMR of compound **183** (500 MHz, CDCl<sub>3</sub>)

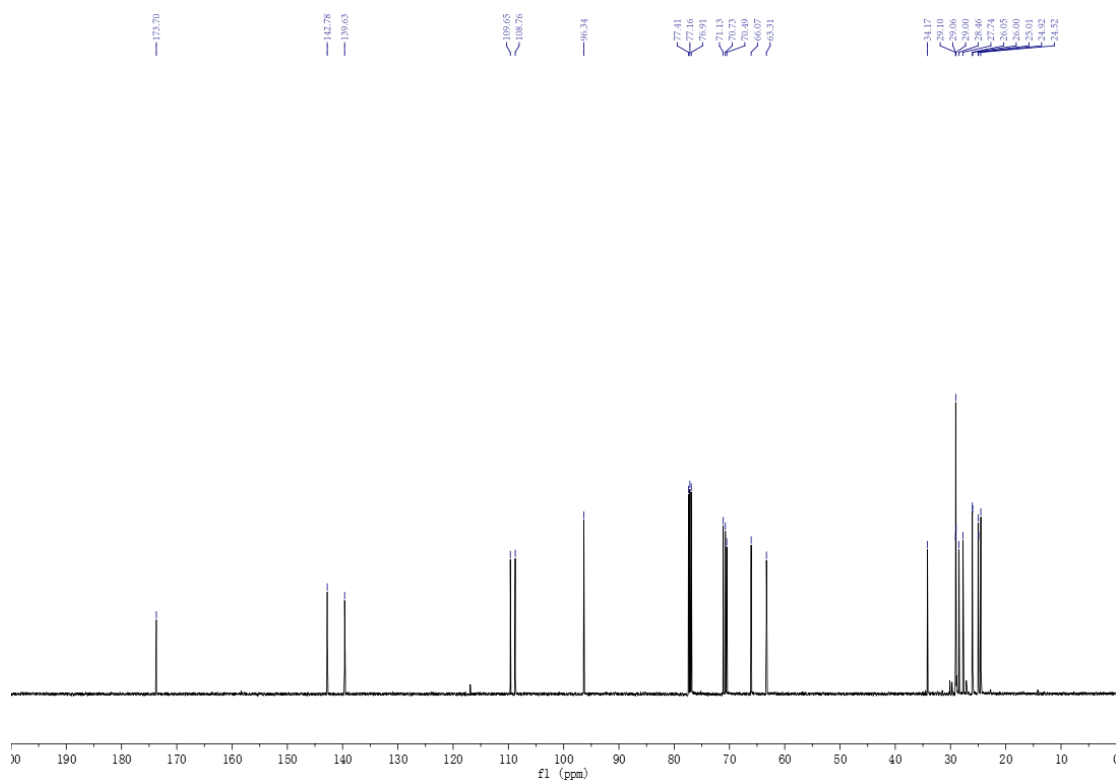

<sup>13</sup>C NMR of compound **183** (126 MHz, CDCl<sub>3</sub>)

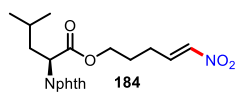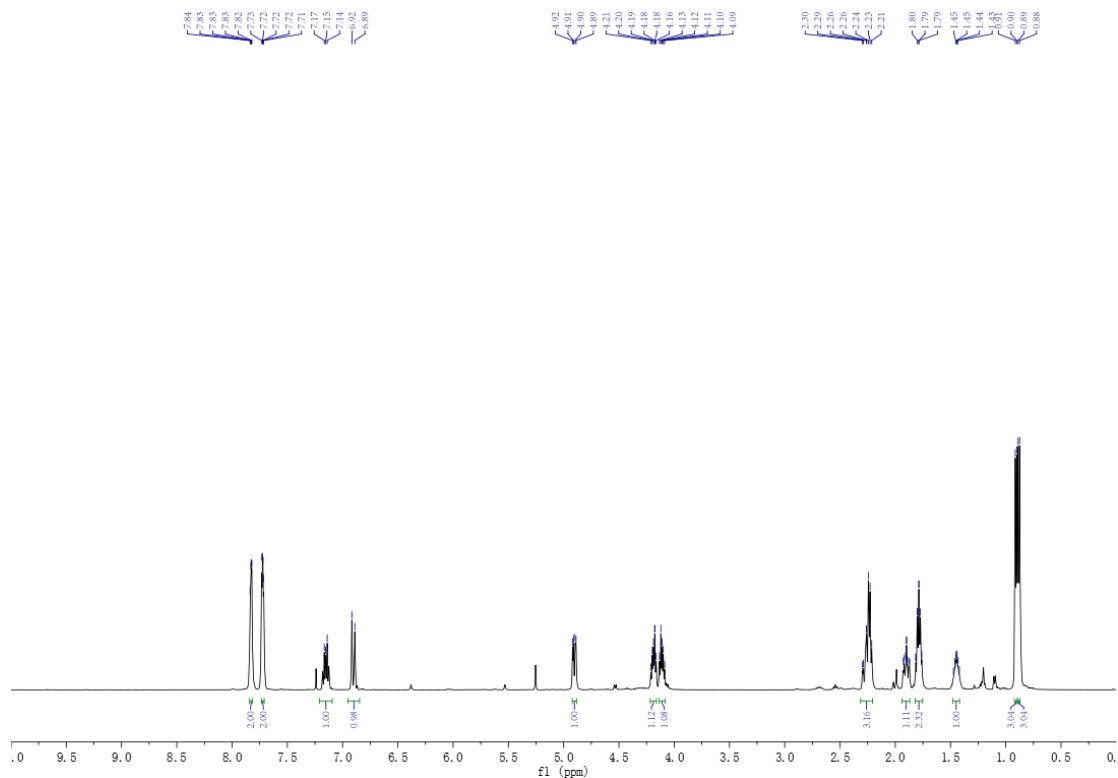

<sup>1</sup>H NMR of compound **184** (500 MHz, CDCl<sub>3</sub>)

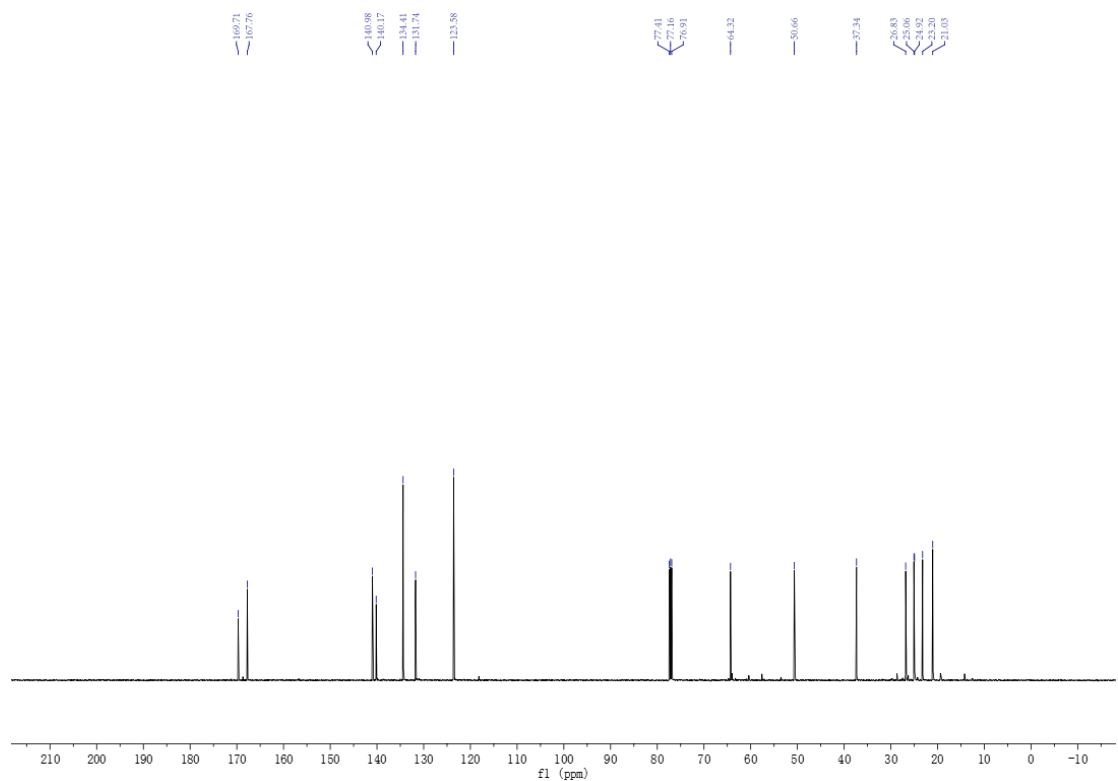

<sup>13</sup>C NMR of compound **184** (126 MHz, CDCl<sub>3</sub>)

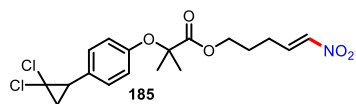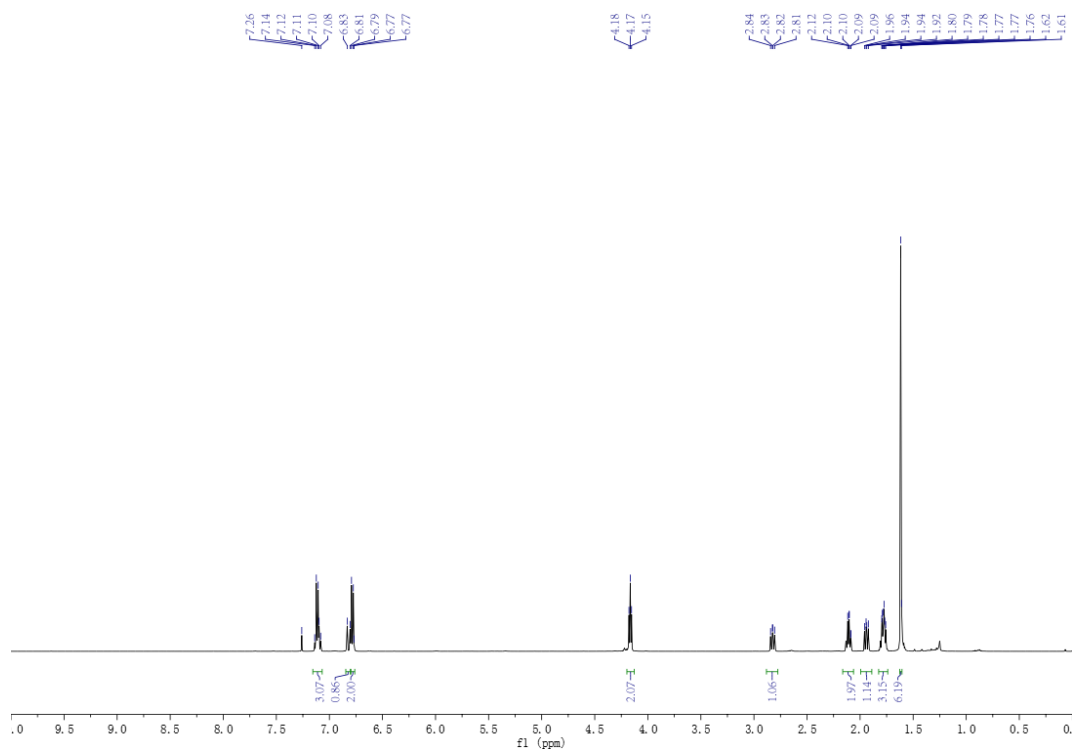

<sup>1</sup>H NMR of compound **185** (500 MHz, CDCl<sub>3</sub>)

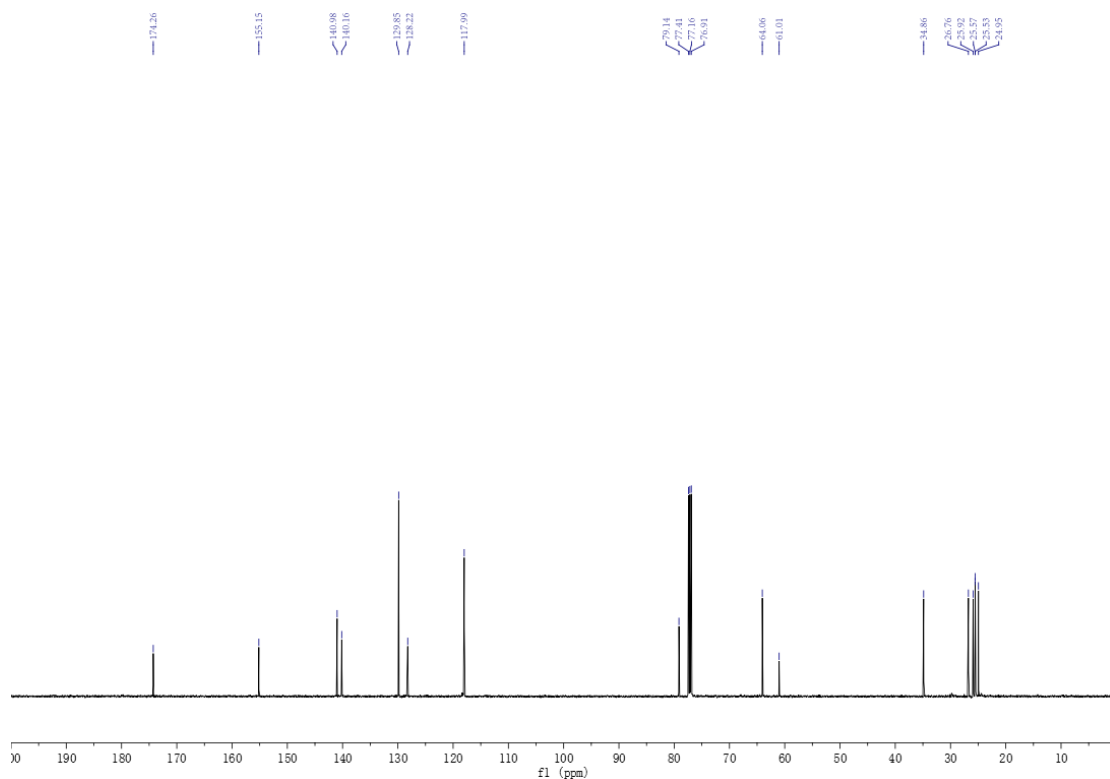

<sup>13</sup>C NMR of compound **185** (126 MHz, CDCl<sub>3</sub>)

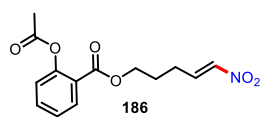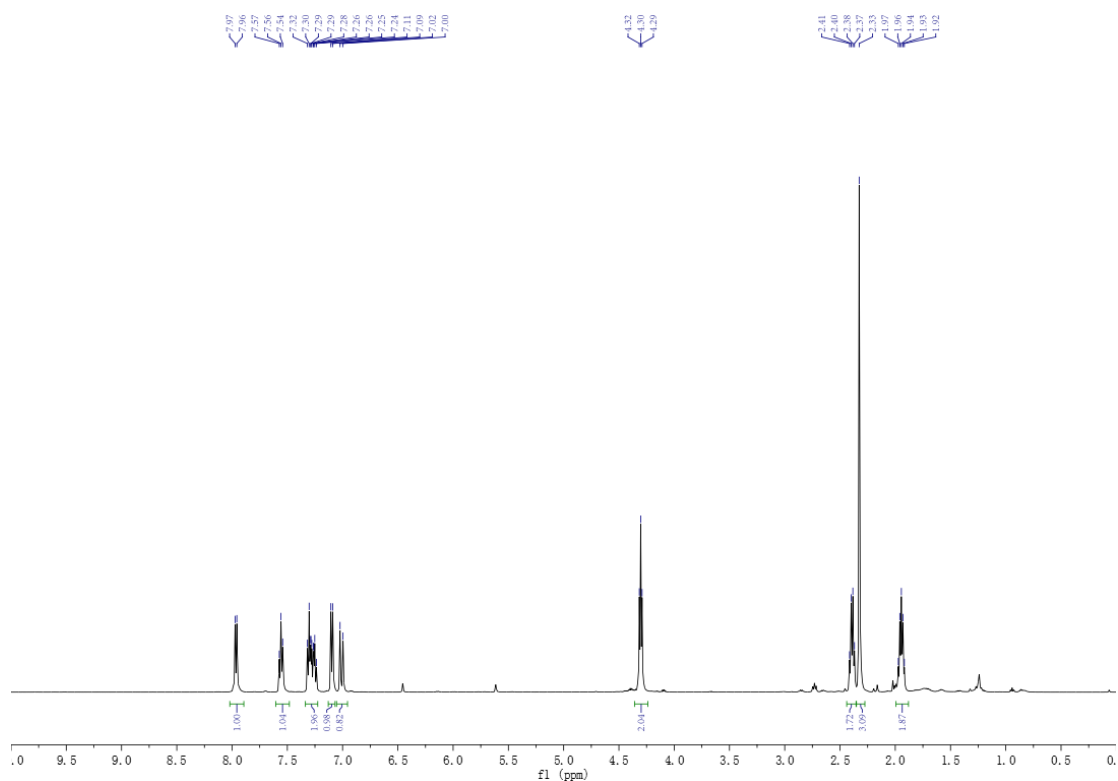

<sup>1</sup>H NMR of compound **186** (500 MHz, CDCl<sub>3</sub>)

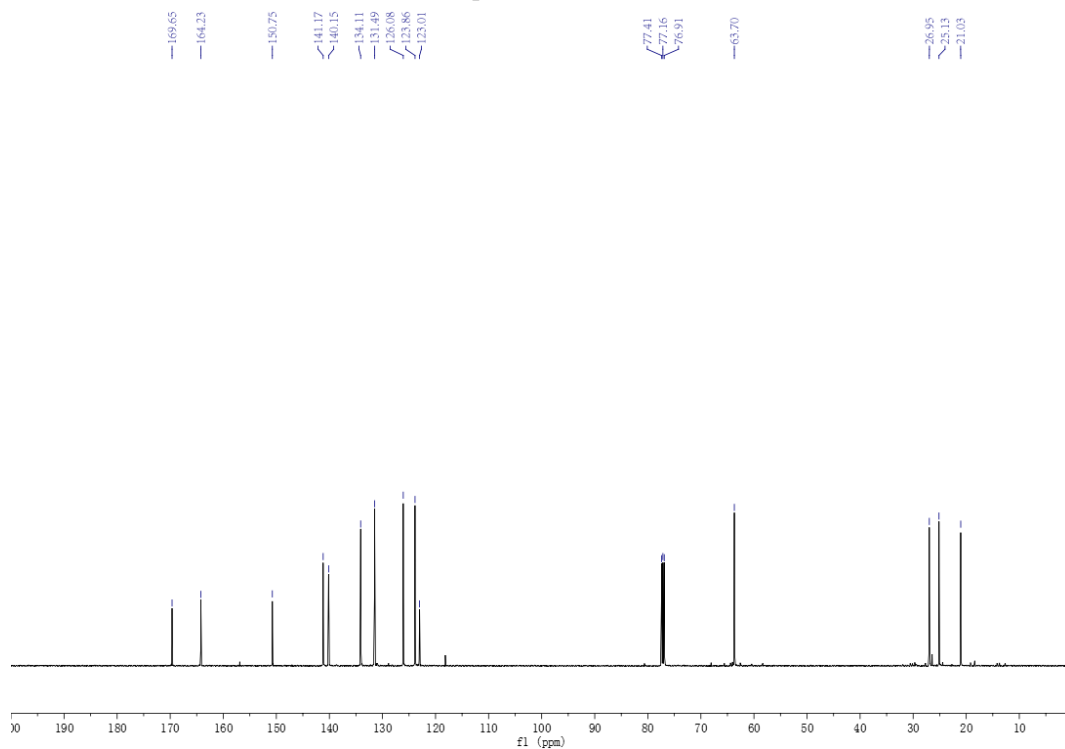

<sup>13</sup>C NMR of compound **186** (126 MHz, CDCl<sub>3</sub>)

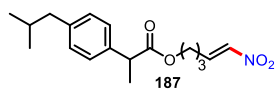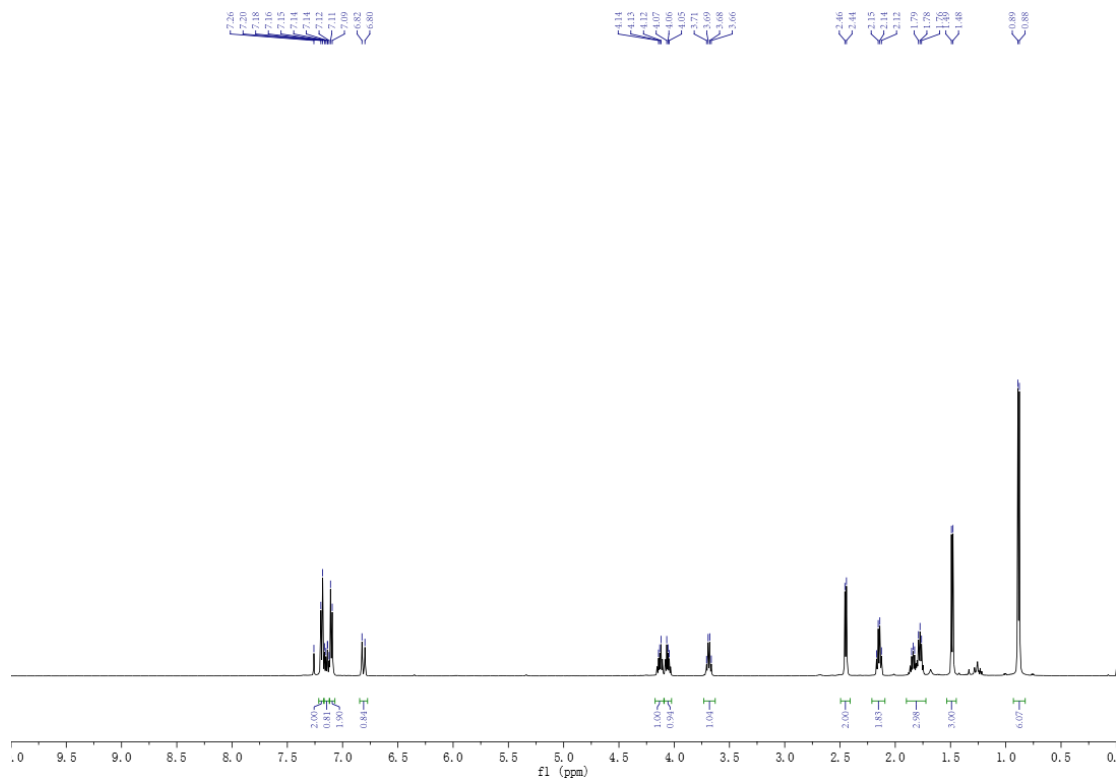

<sup>1</sup>H NMR of compound **187** (500 MHz, CDCl<sub>3</sub>)

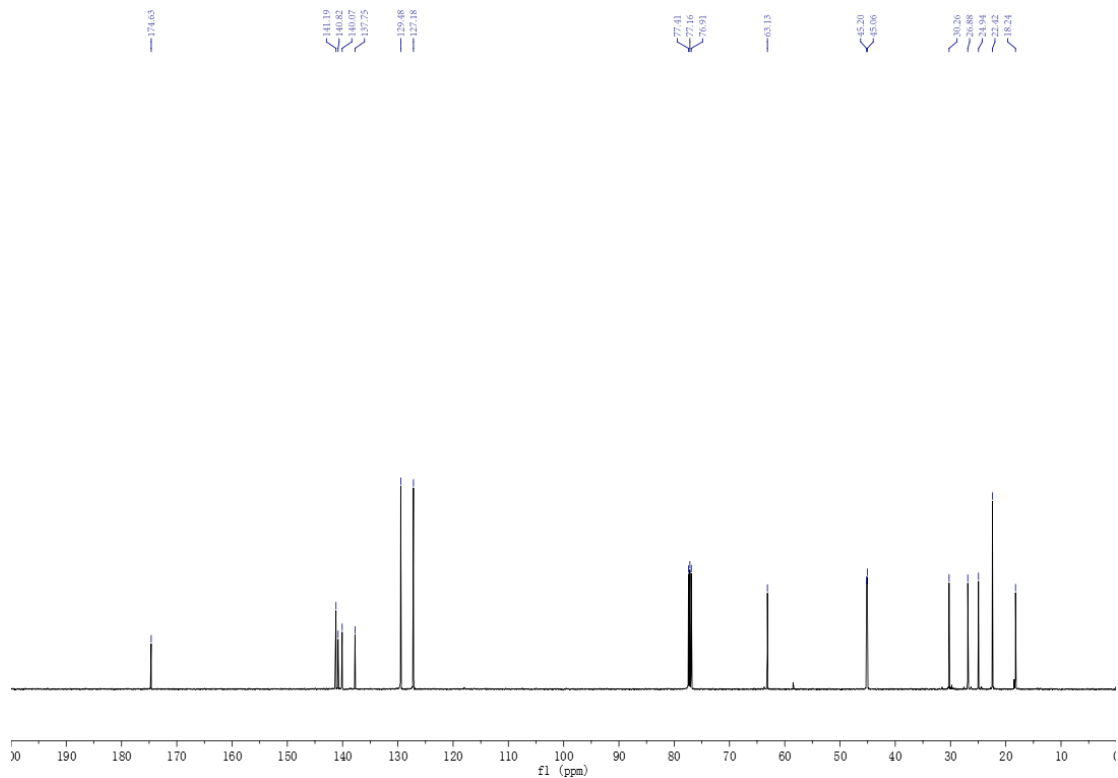

<sup>13</sup>C NMR of compound **187** (126 MHz, CDCl<sub>3</sub>)

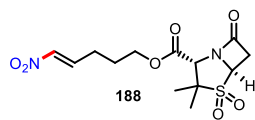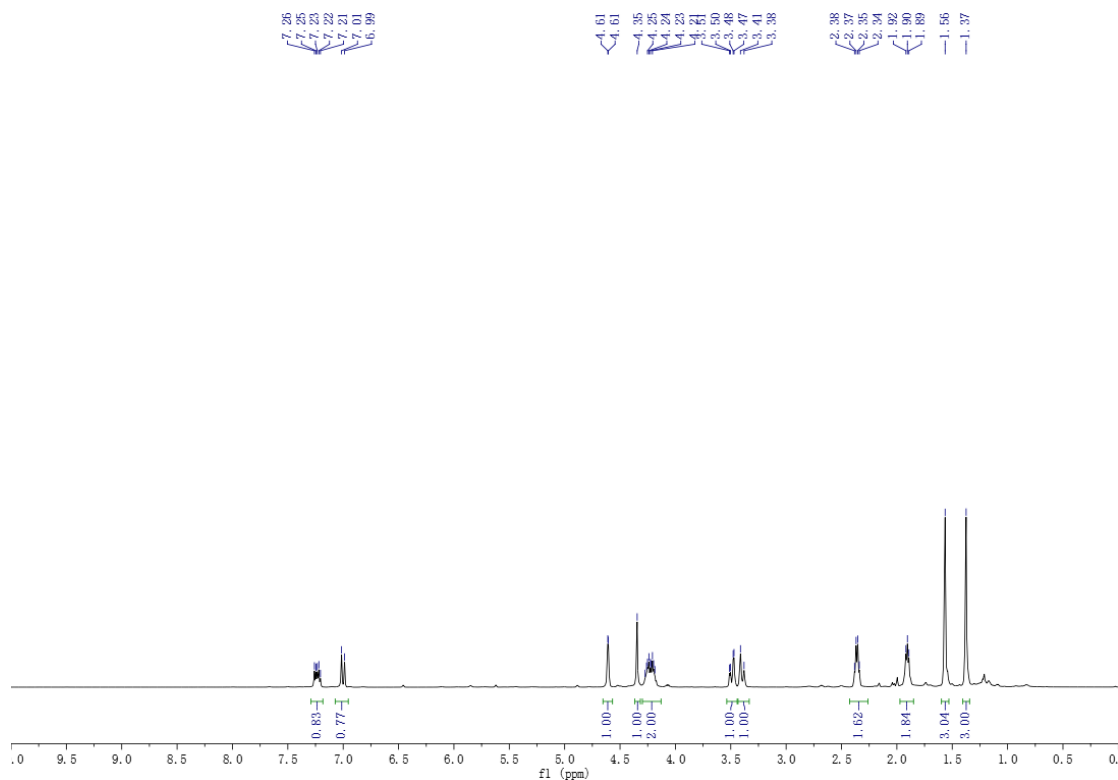

<sup>1</sup>H NMR of compound **188** (500 MHz, CDCl<sub>3</sub>)

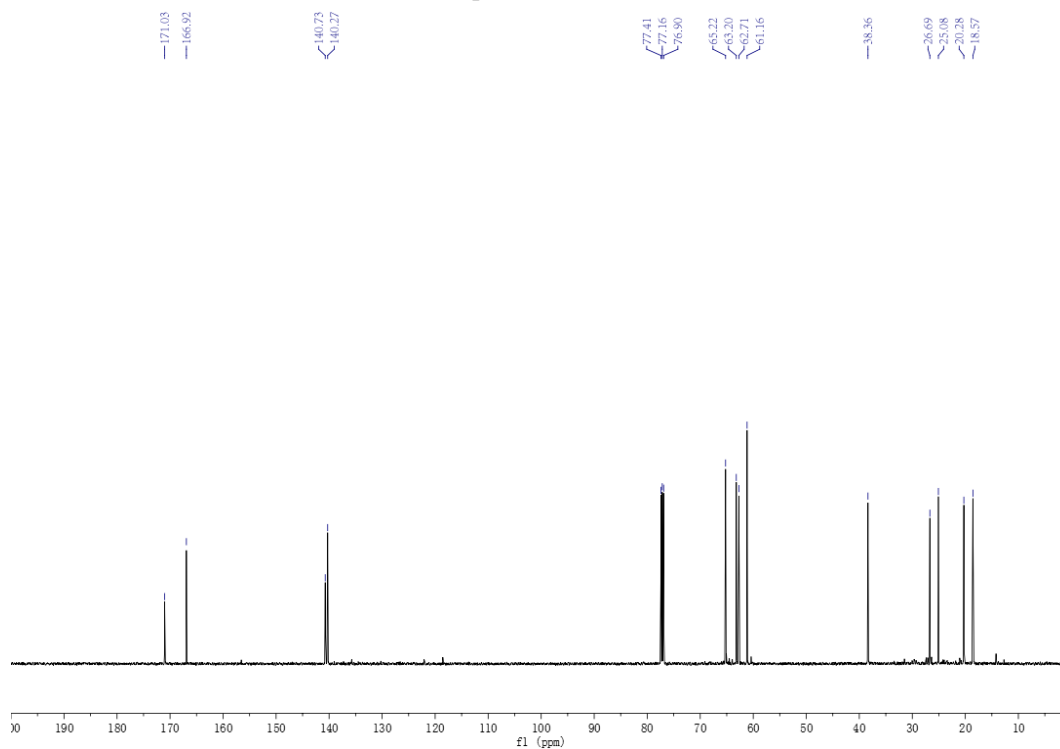

<sup>13</sup>C NMR of compound **188** (126 MHz, CDCl<sub>3</sub>)

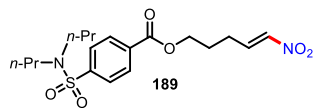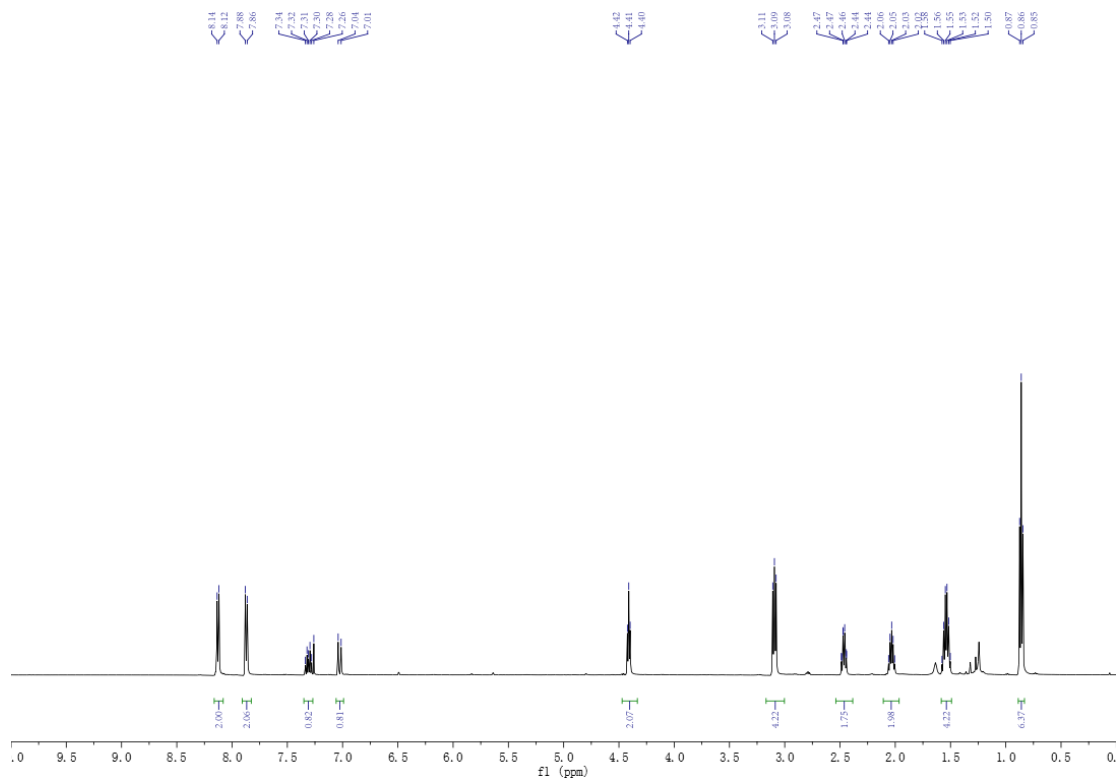

<sup>1</sup>H NMR of compound **189** (500 MHz, CDCl<sub>3</sub>)

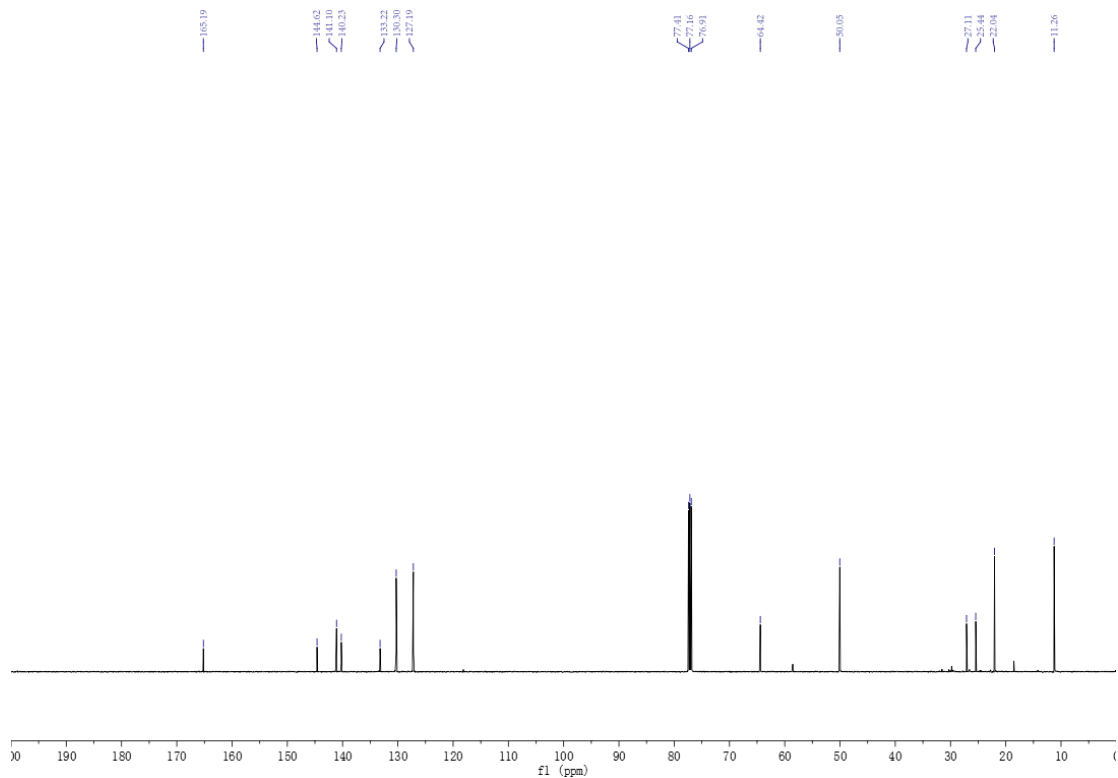

<sup>13</sup>C NMR of compound **189** (126 MHz, CDCl<sub>3</sub>)



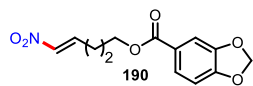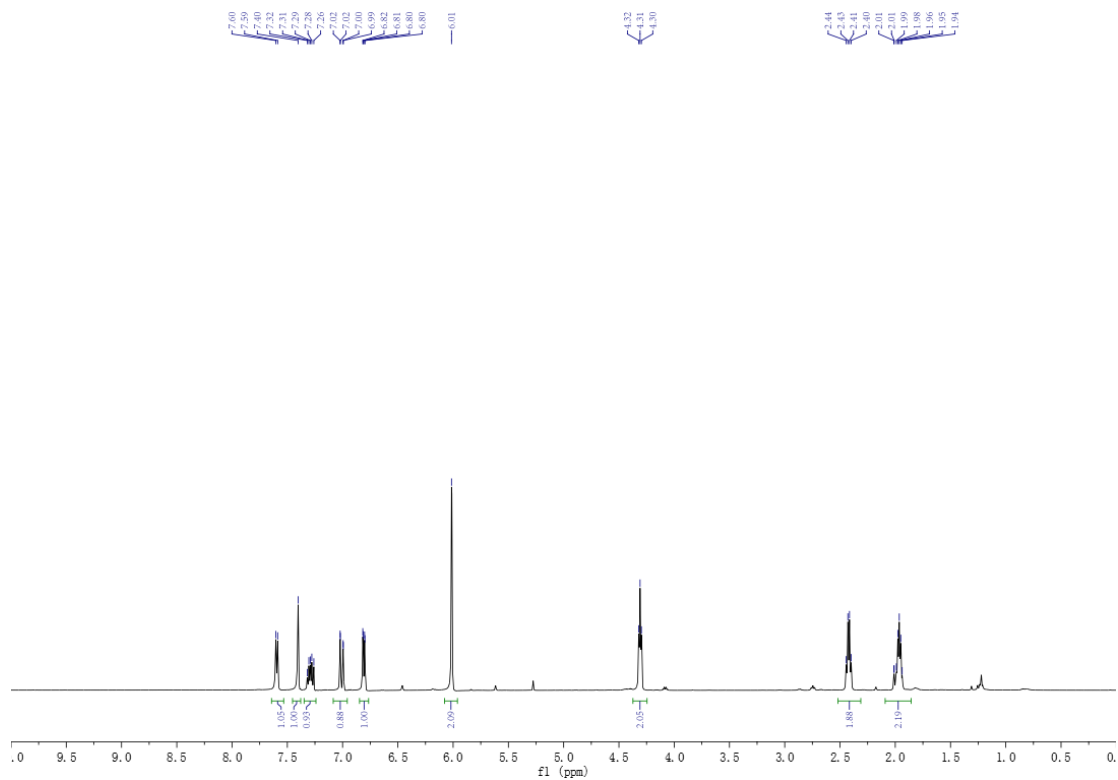

<sup>1</sup>H NMR of compound **190** (500 MHz, CDCl<sub>3</sub>)

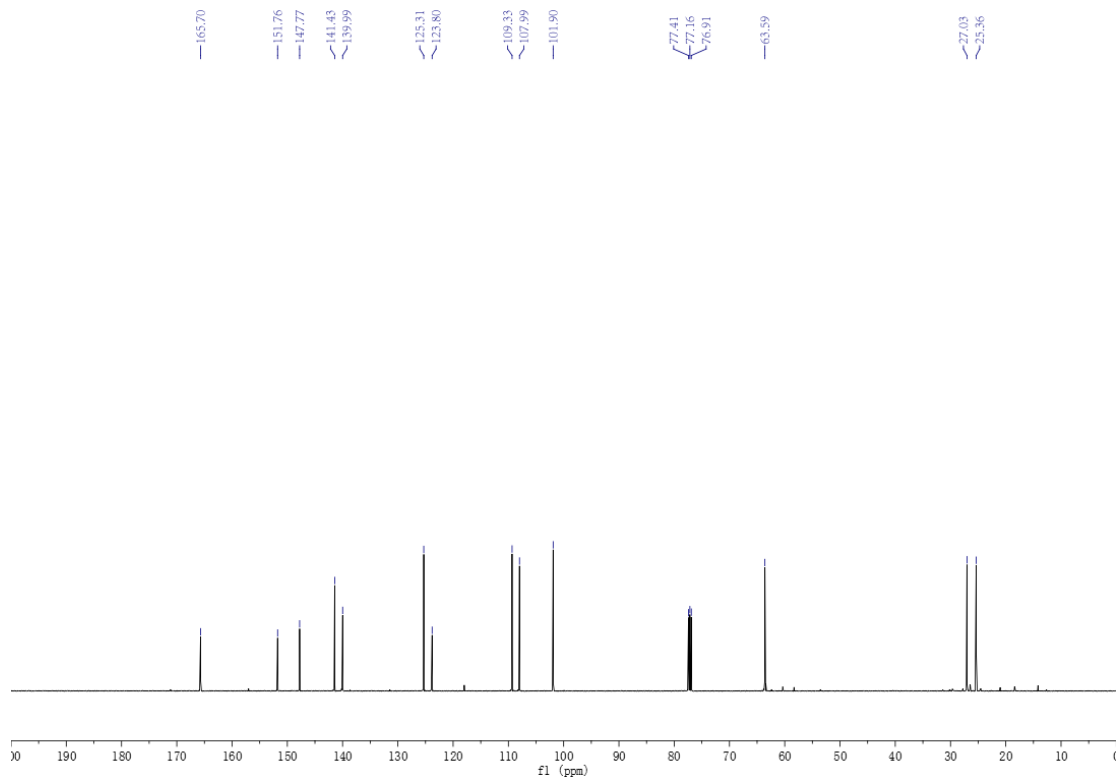

<sup>13</sup>C NMR of compound **190** (126 MHz, CDCl<sub>3</sub>)

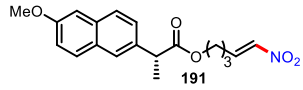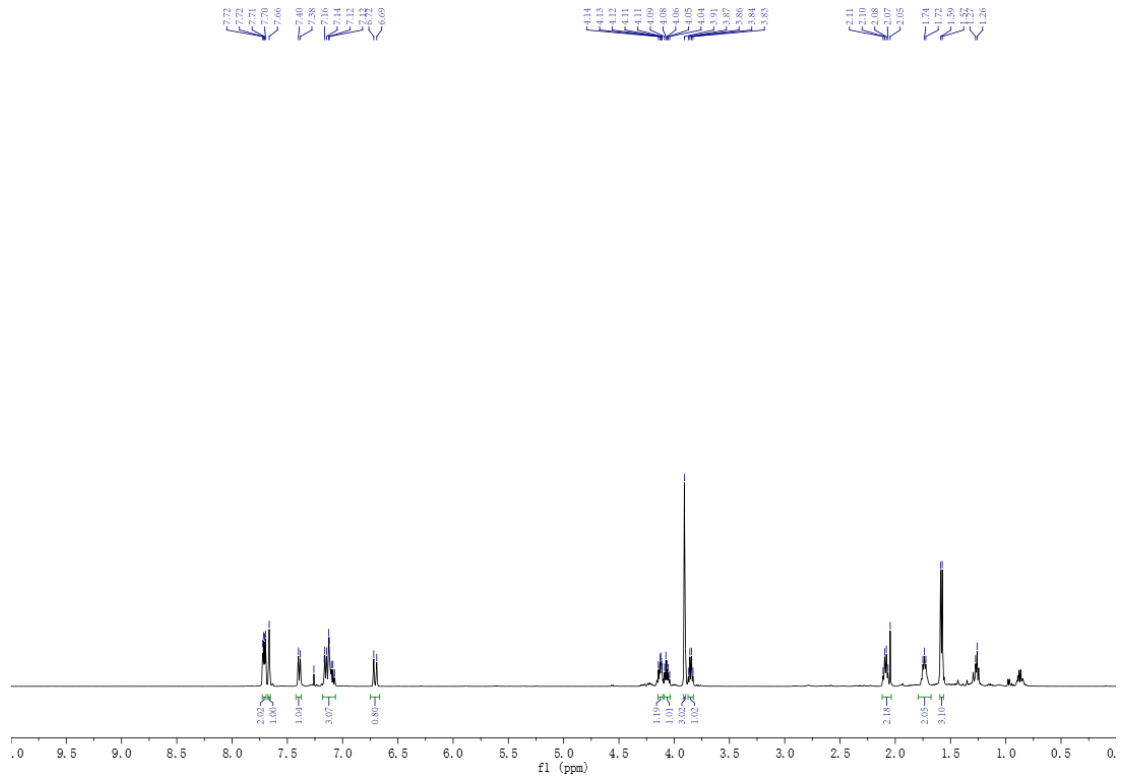

<sup>1</sup>H NMR of compound **191** (500 MHz, CDCl<sub>3</sub>)

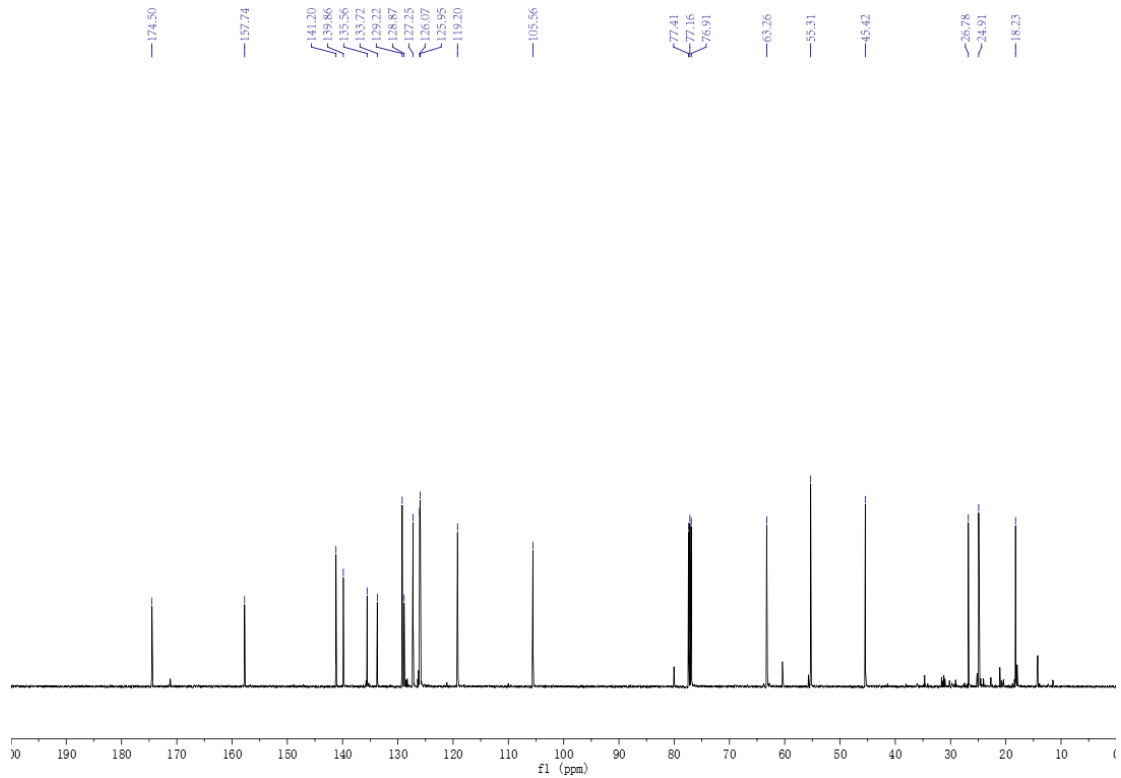

<sup>13</sup>C NMR of compound **191** (126 MHz, CDCl<sub>3</sub>)

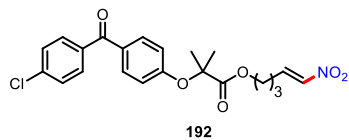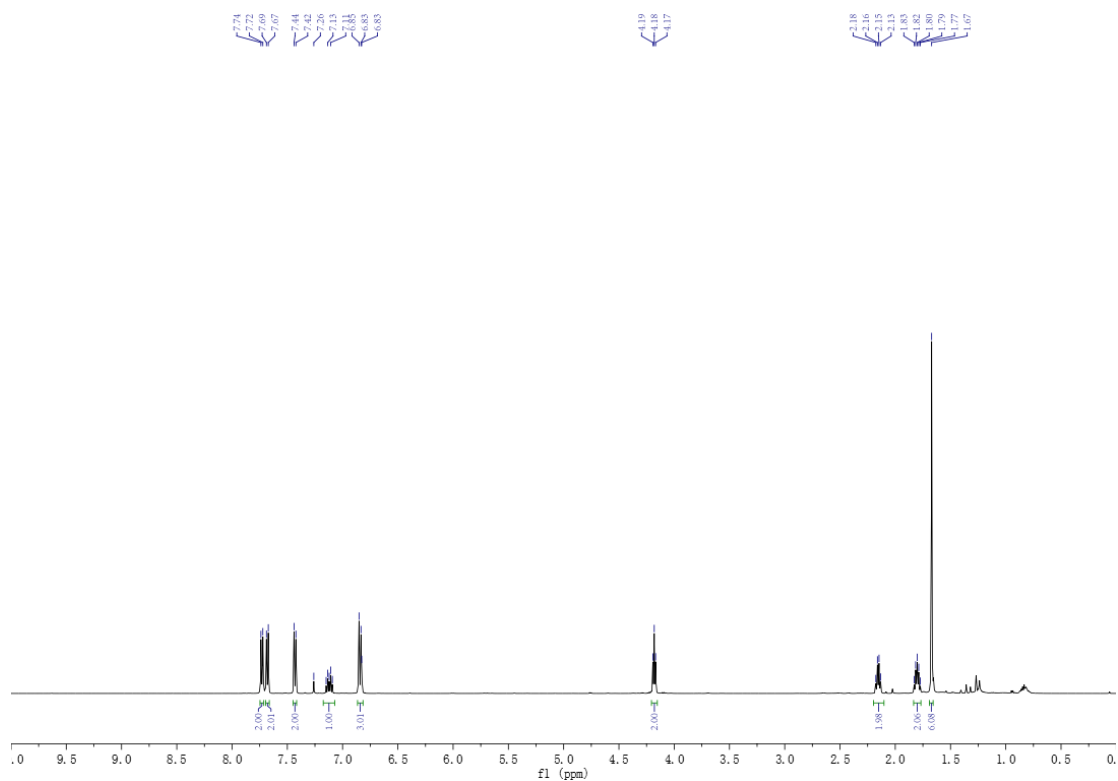

<sup>1</sup>H NMR of compound **192** (500 MHz, CDCl<sub>3</sub>)

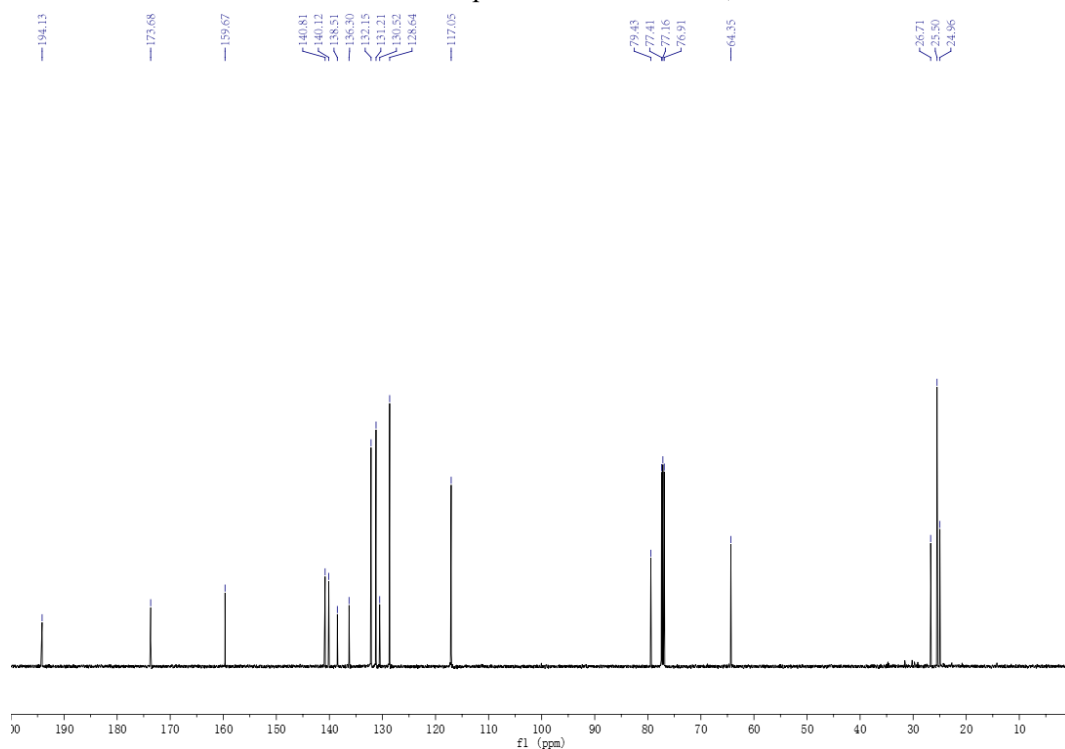

<sup>13</sup>C NMR of compound **192** (126 MHz, CDCl<sub>3</sub>)

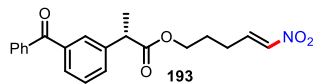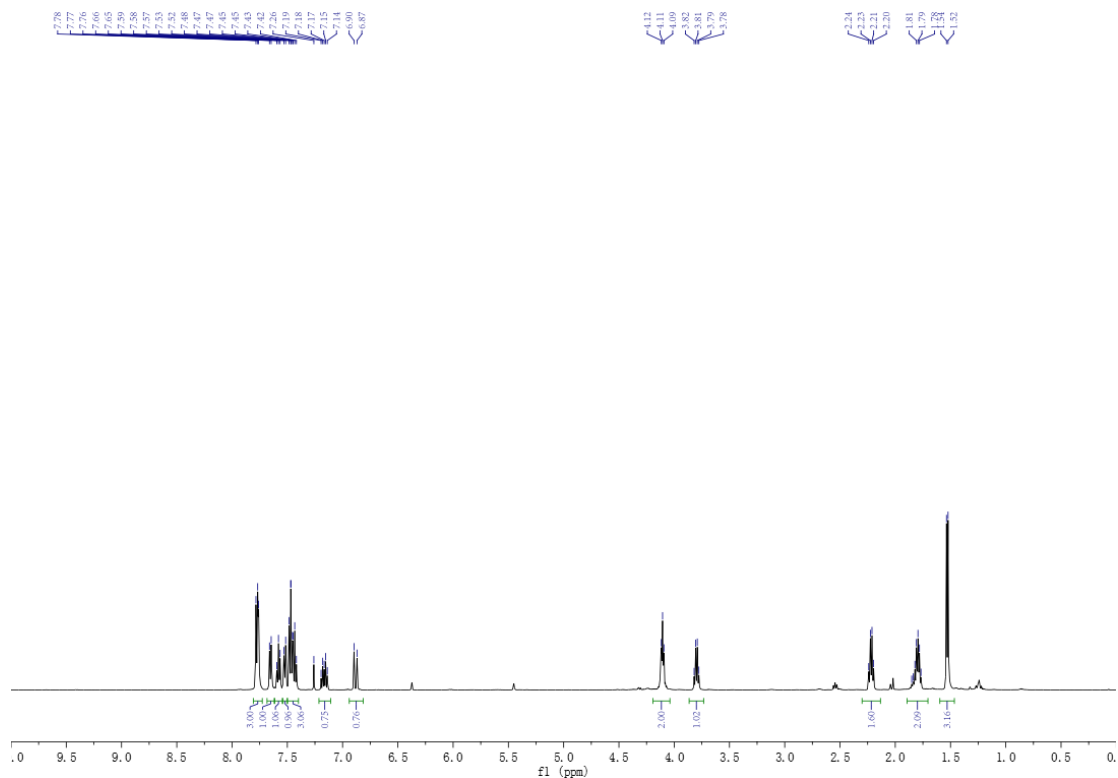

<sup>1</sup>H NMR of compound **193** (500 MHz, CDCl<sub>3</sub>)

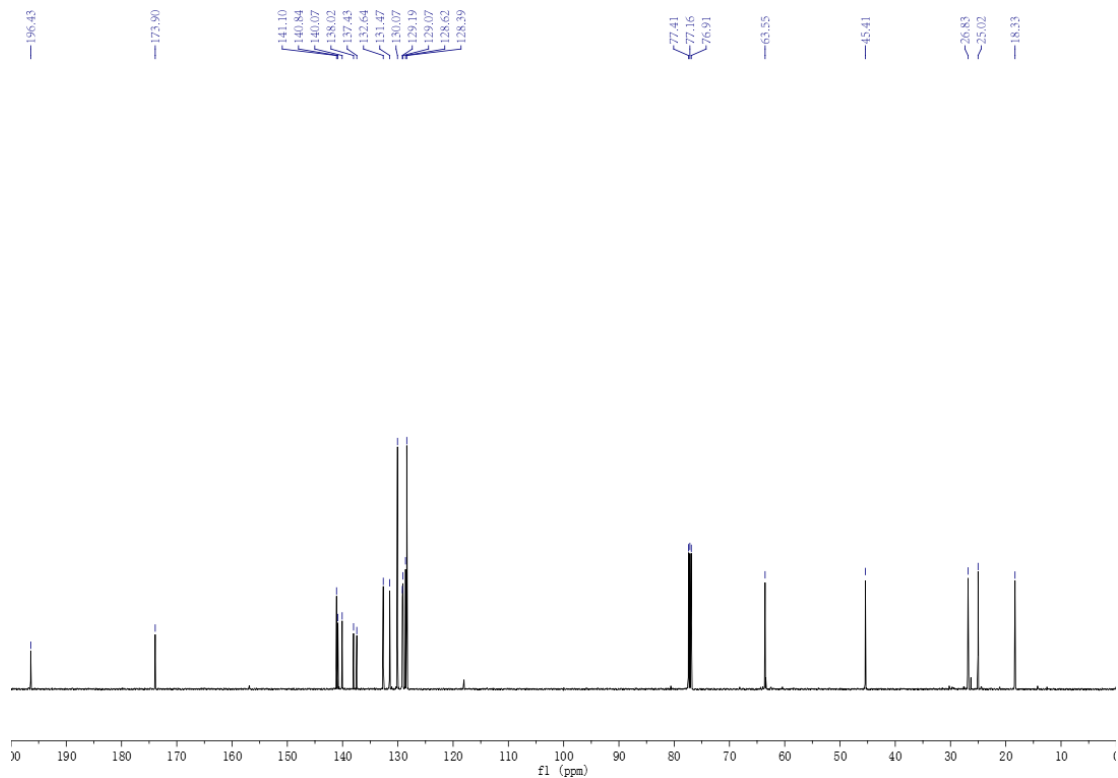

<sup>13</sup>C NMR of compound **193** (126 MHz, CDCl<sub>3</sub>)

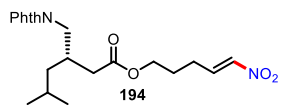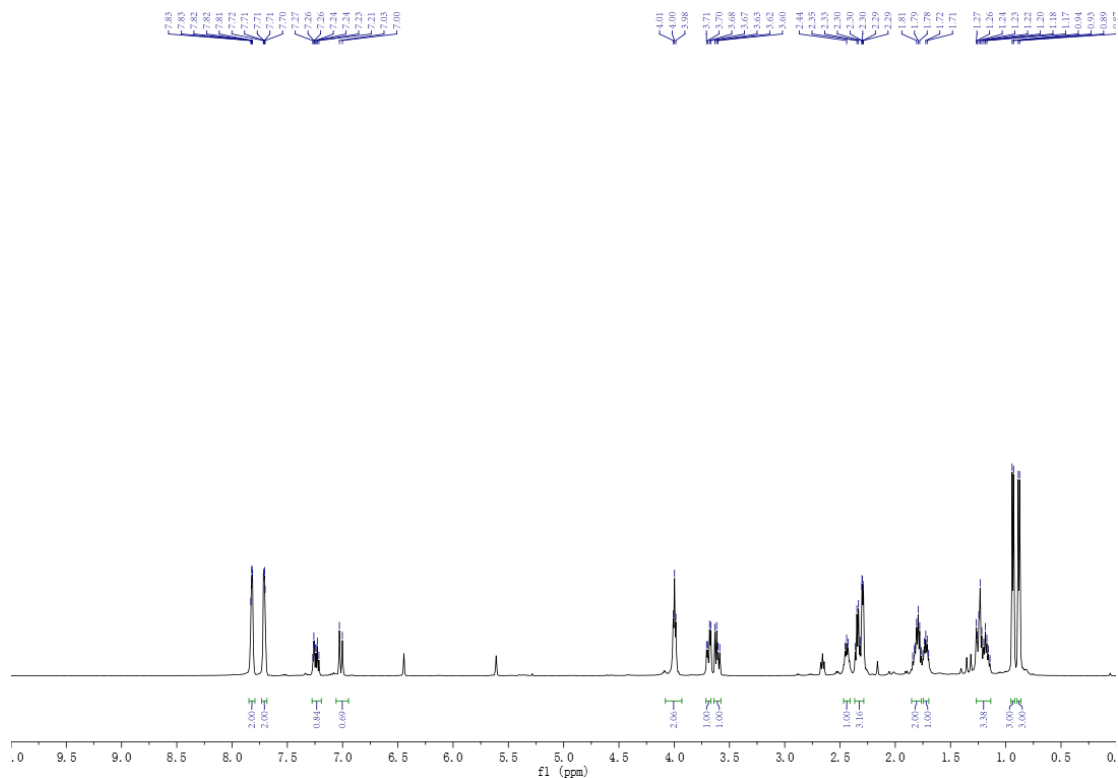

<sup>1</sup>H NMR of compound **194** (500 MHz, CDCl<sub>3</sub>)

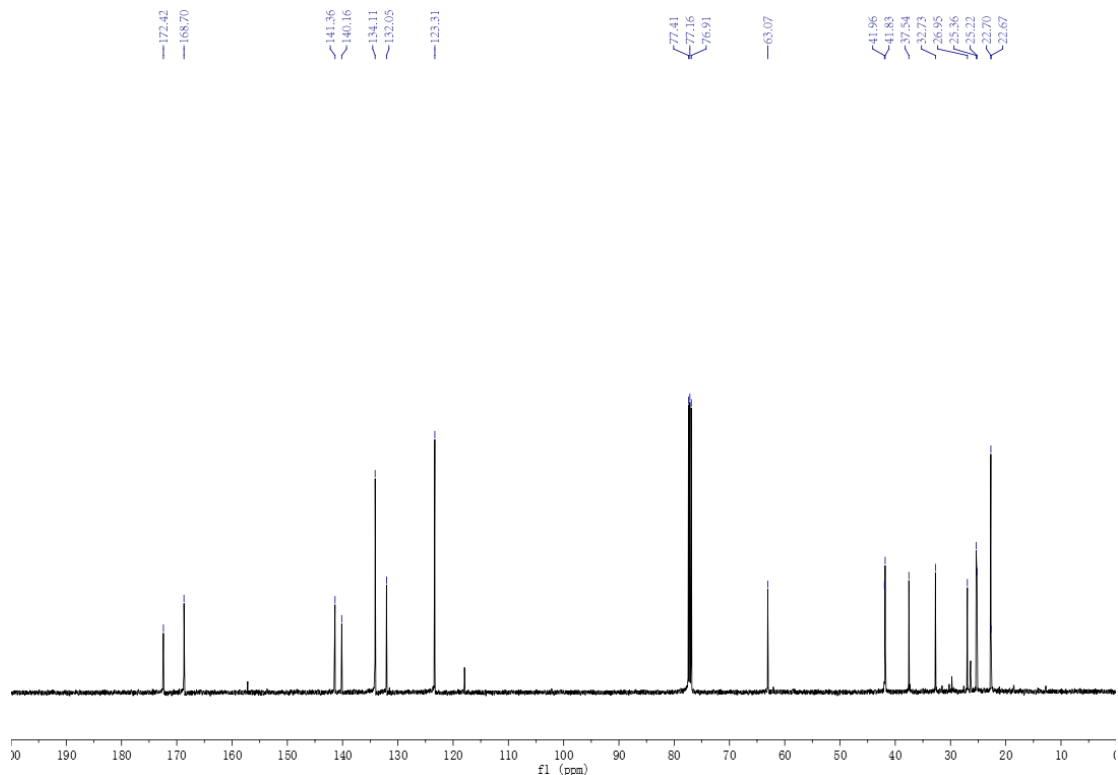

<sup>13</sup>C NMR of compound **194** (126 MHz, CDCl<sub>3</sub>)

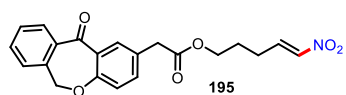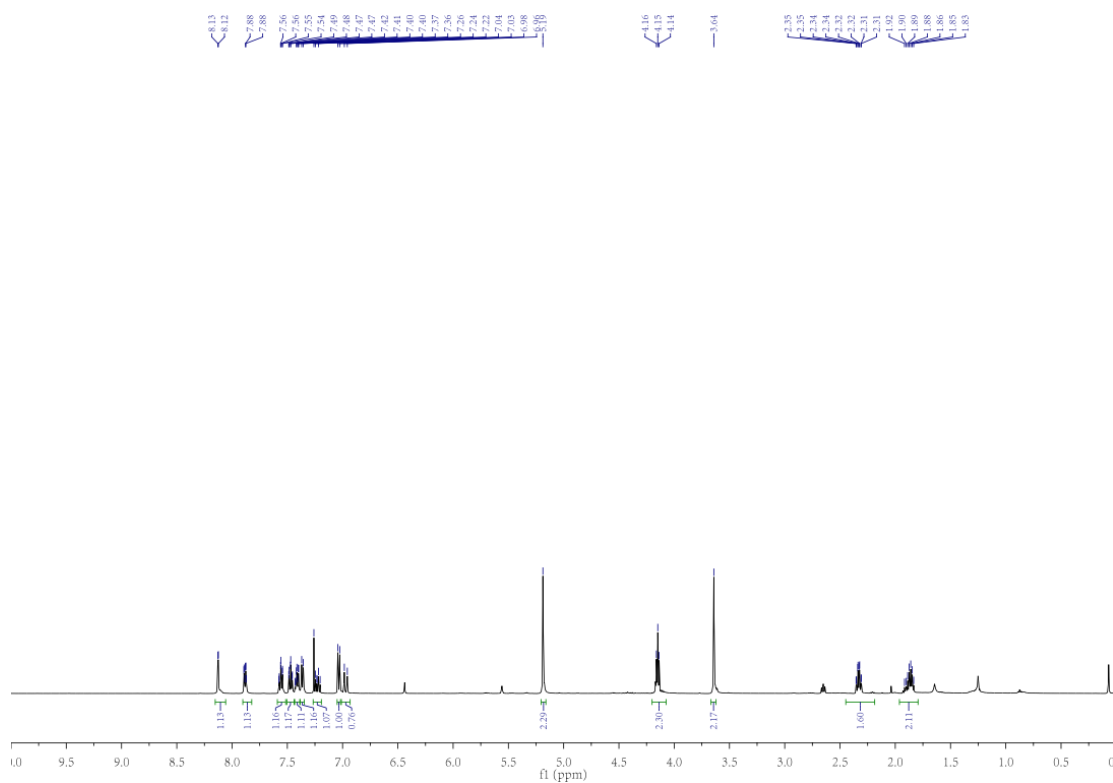

<sup>1</sup>H NMR of compound **195** (500 MHz, CDCl<sub>3</sub>)

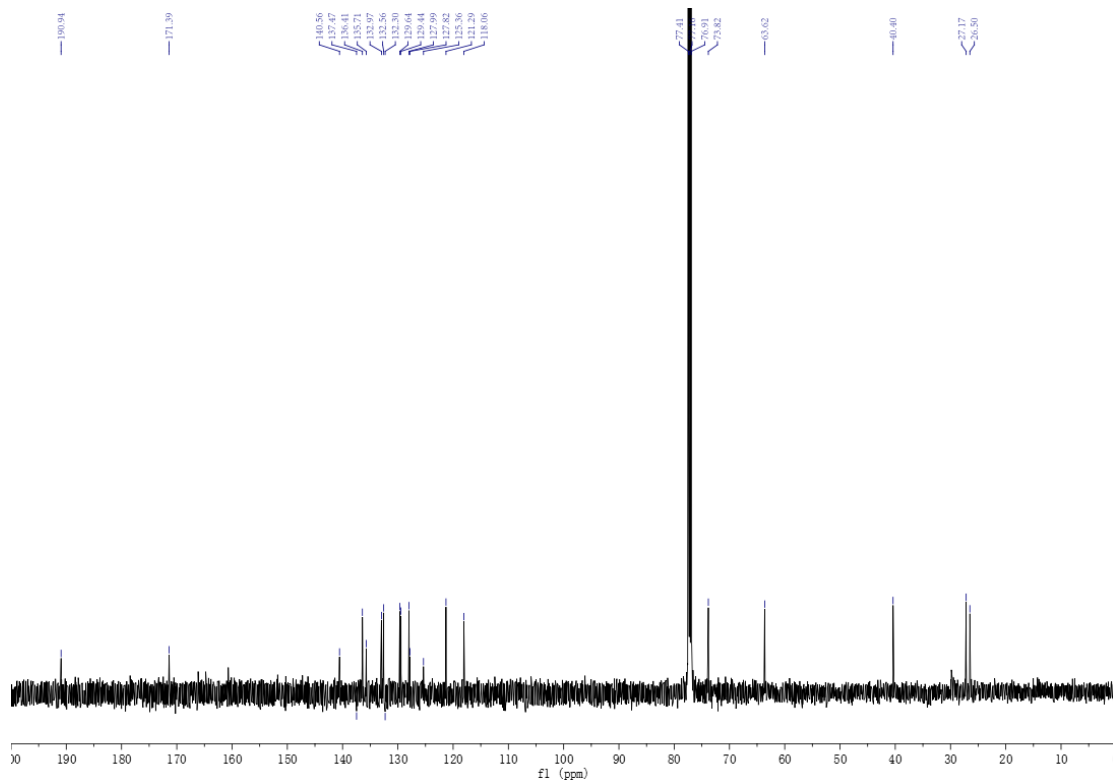

<sup>13</sup>C NMR of compound **195** (126 MHz, CDCl<sub>3</sub>)

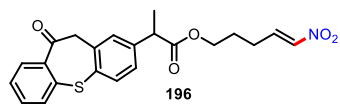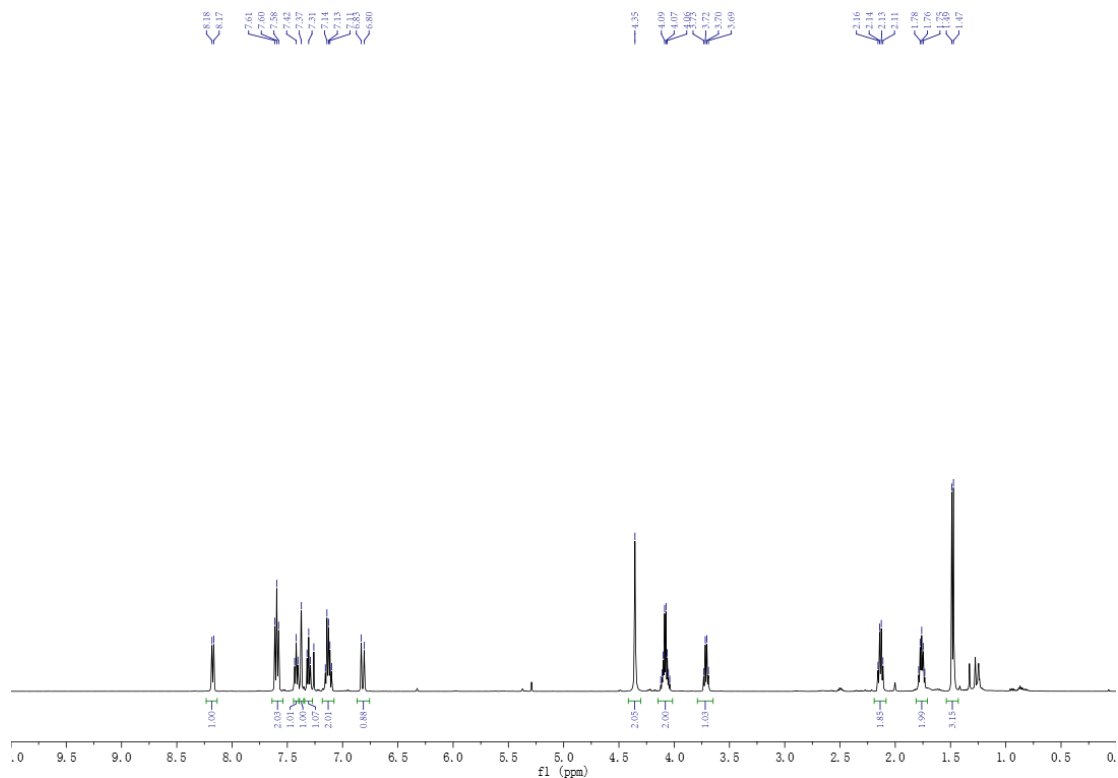

<sup>1</sup>H NMR of compound **196** (500 MHz, CDCl<sub>3</sub>)

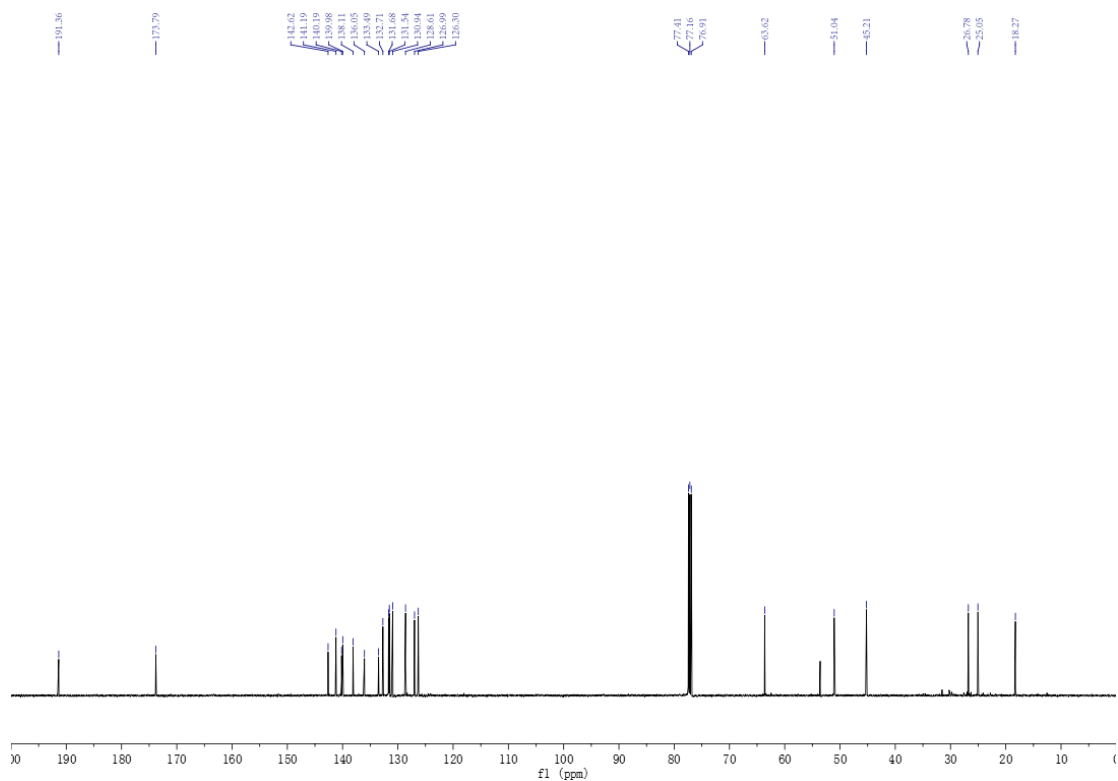

<sup>13</sup>C NMR of compound **196** (126 MHz, CDCl<sub>3</sub>)

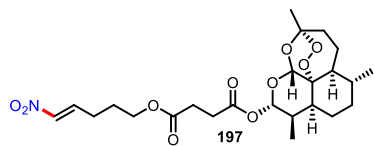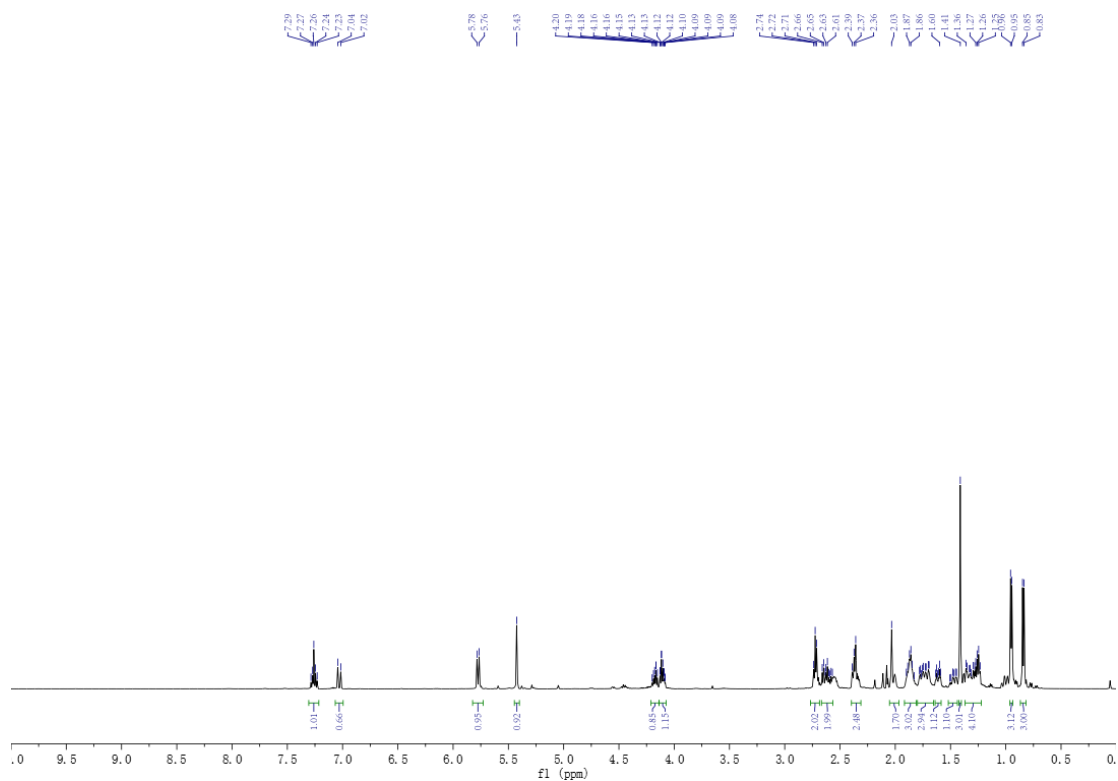

<sup>1</sup>H NMR of compound **197** (500 MHz, CDCl<sub>3</sub>)

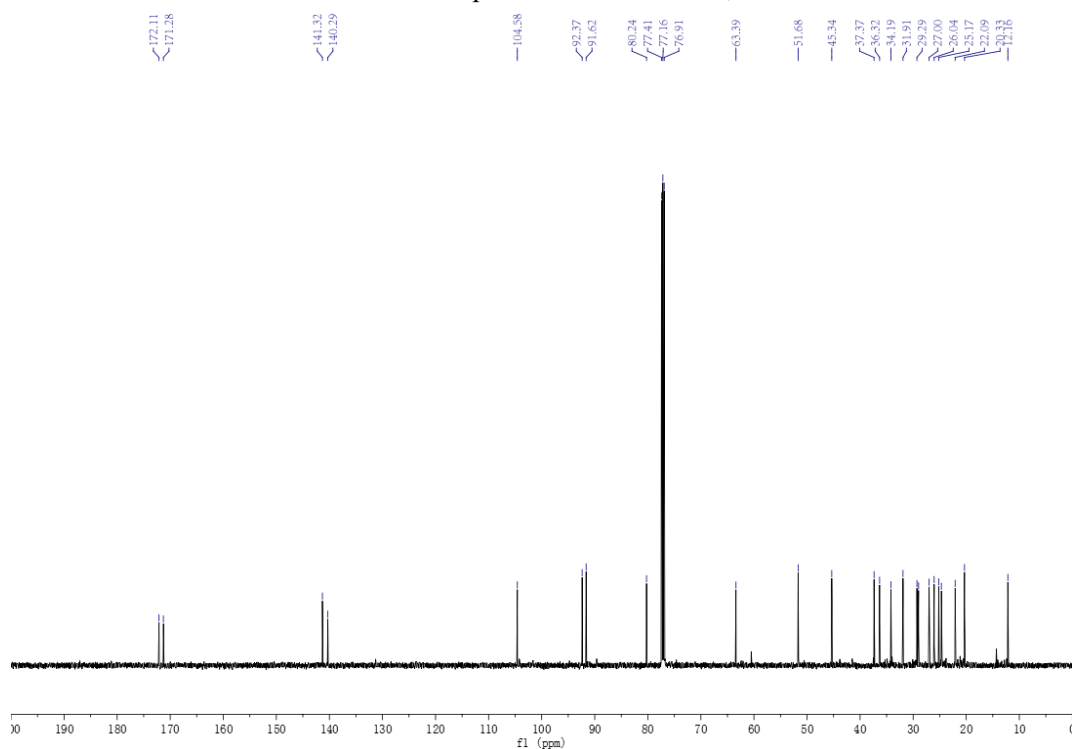

<sup>13</sup>C NMR of compound **197** (126 MHz, CDCl<sub>3</sub>)



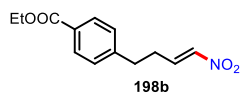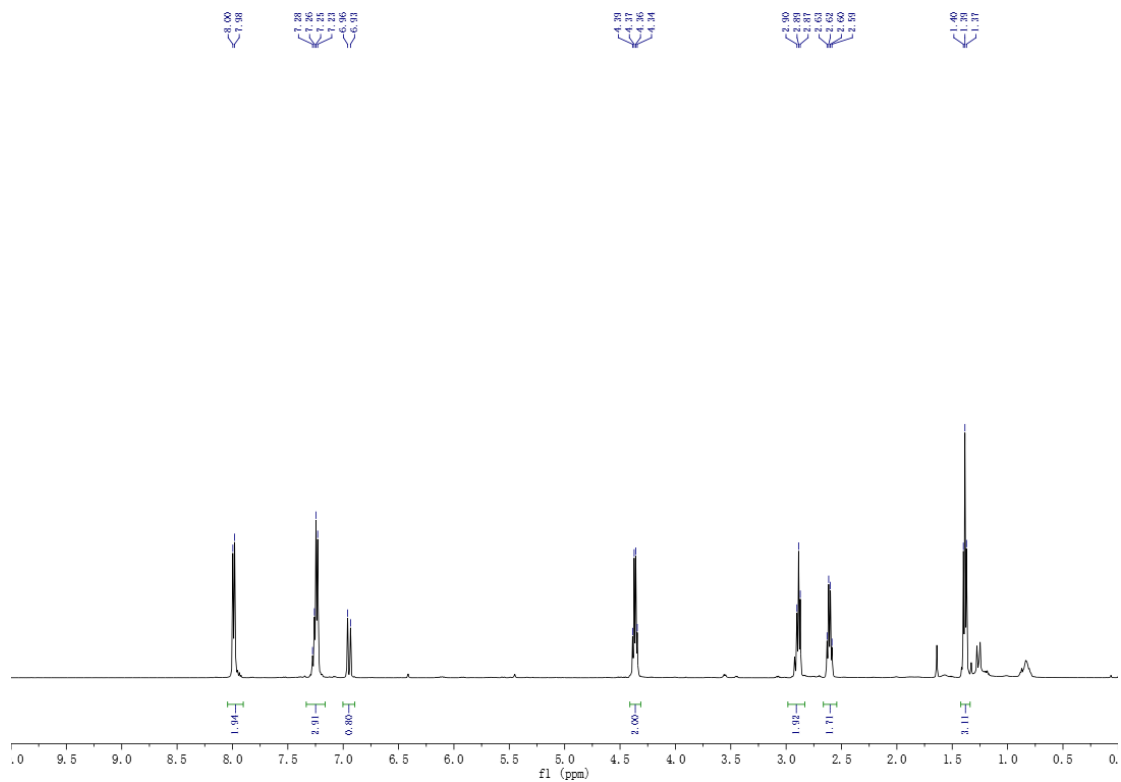

$^1\text{H NMR}$  of compound **198b** (500 MHz,  $\text{CDCl}_3$ )

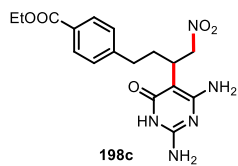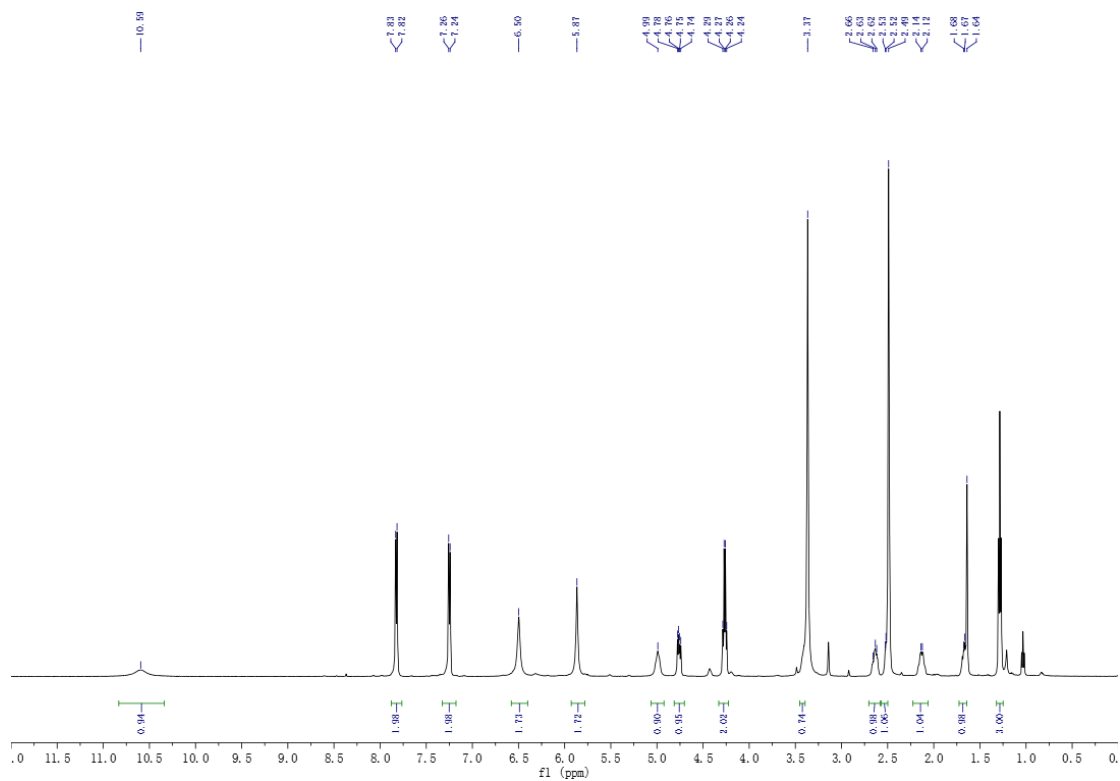

<sup>1</sup>H NMR of compound **198c** (500 MHz, DMSO)

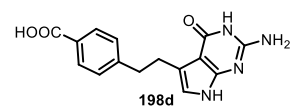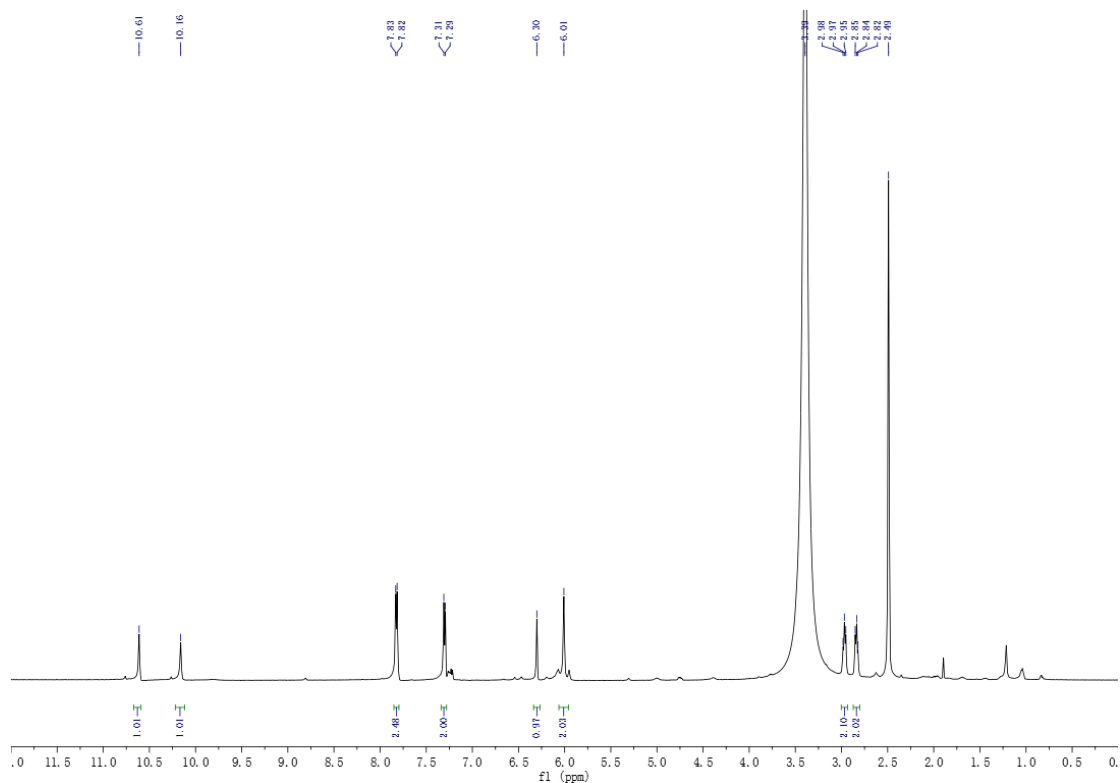

$^1\text{H}$  NMR of compound **198d** (500 MHz, DMSO)

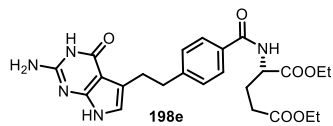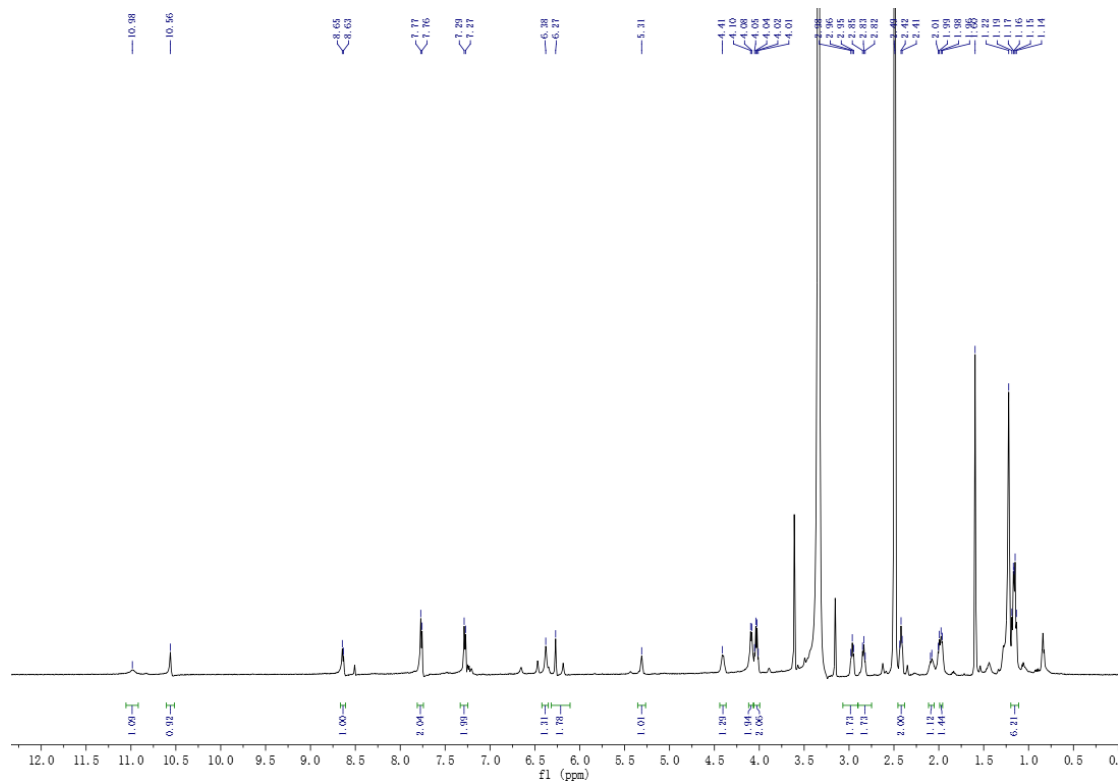

$^1\text{H}$  NMR of compound **198e** (500 MHz, DMSO)

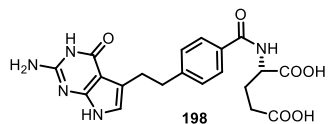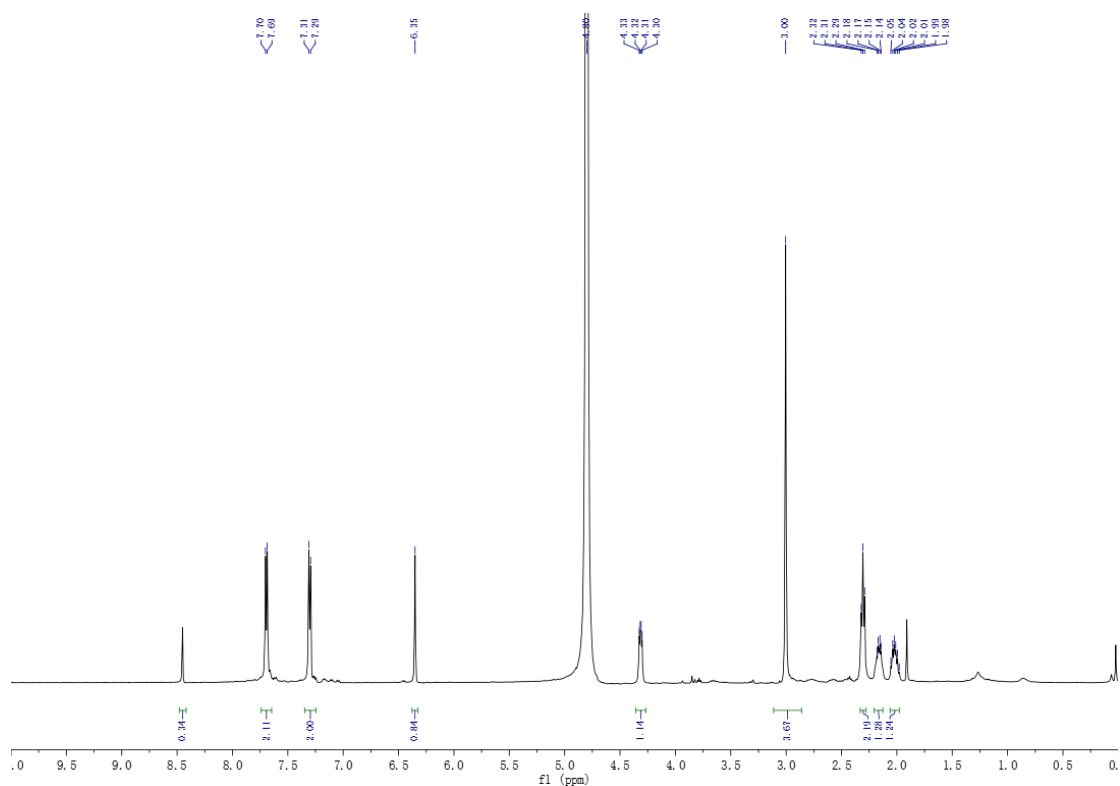

<sup>1</sup>H NMR of compound **198** (500 MHz, D<sub>2</sub>O)

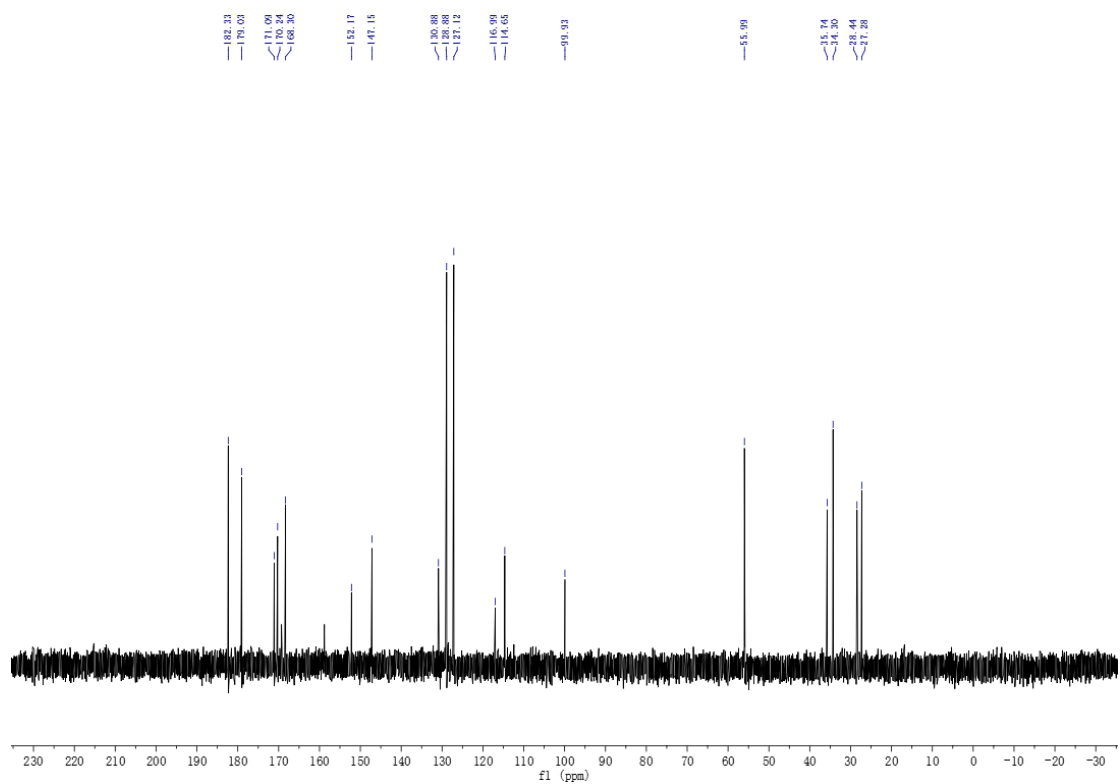

<sup>13</sup>C NMR of compound **198** (126 MHz, D<sub>2</sub>O)

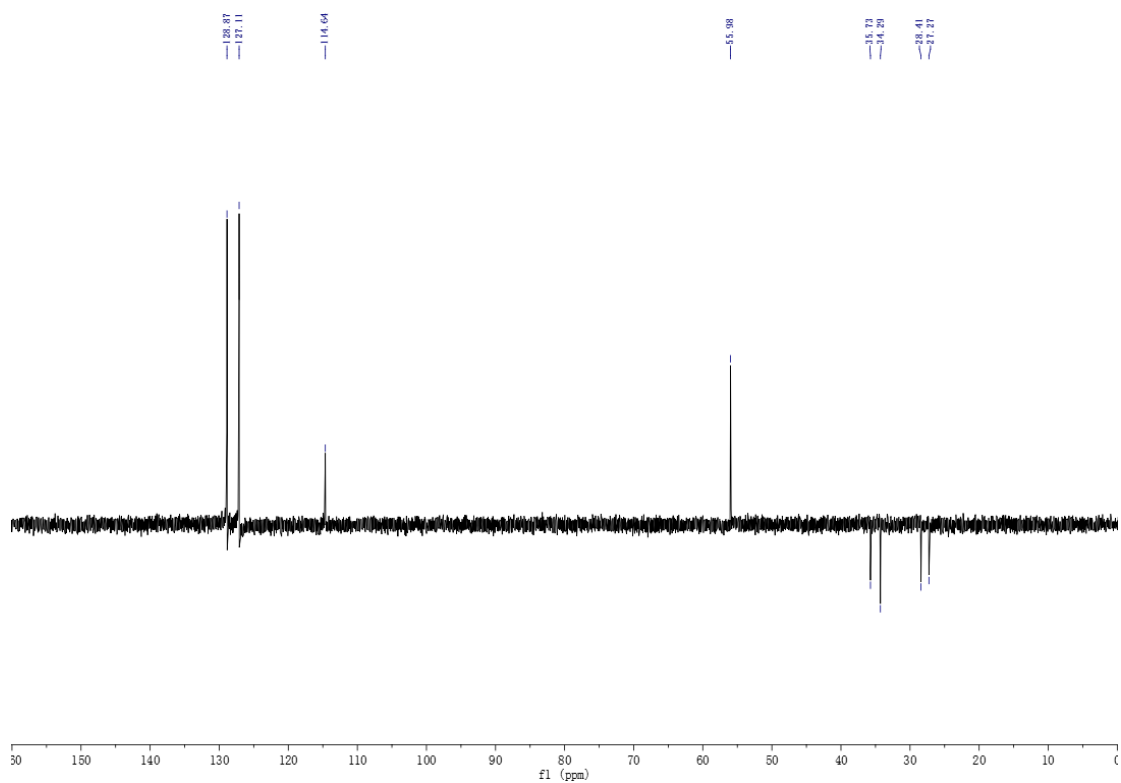

$^{13}\text{C}$  NMR of compound **198** (126 MHz,  $\text{D}_2\text{O}$ )

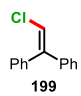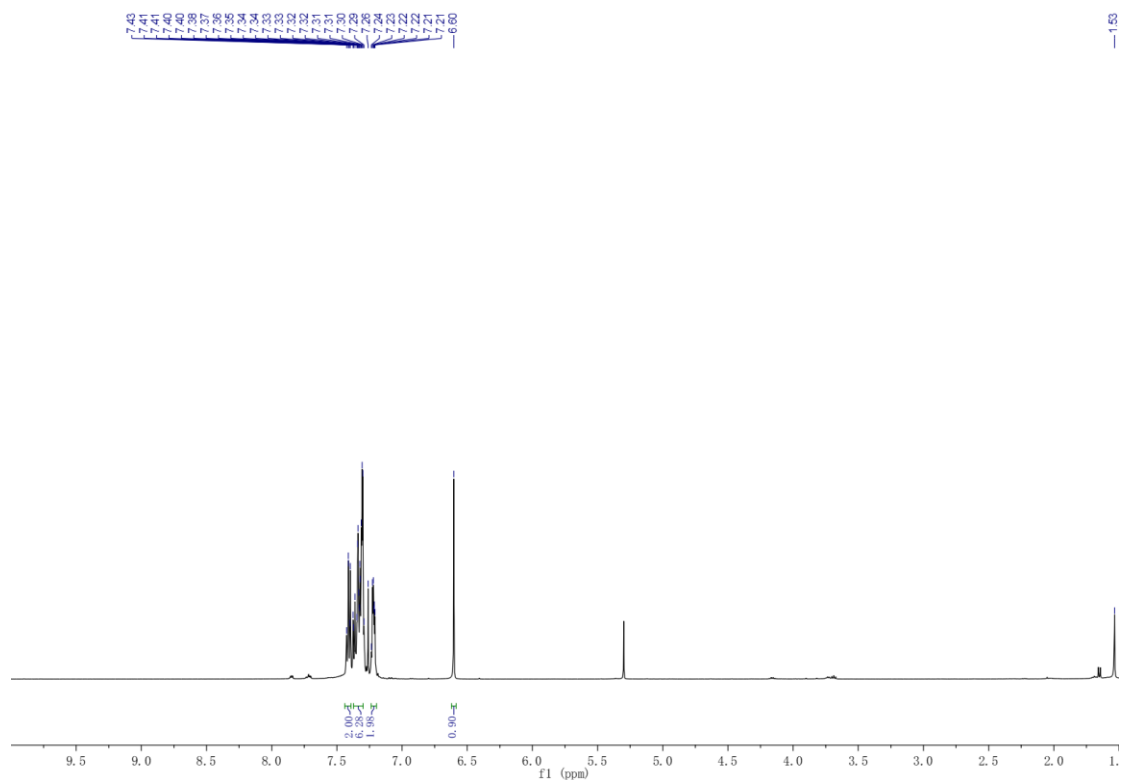

$^1\text{H}$  NMR of compound **199** (500 MHz,  $\text{CDCl}_3$ )

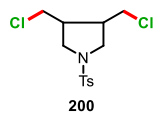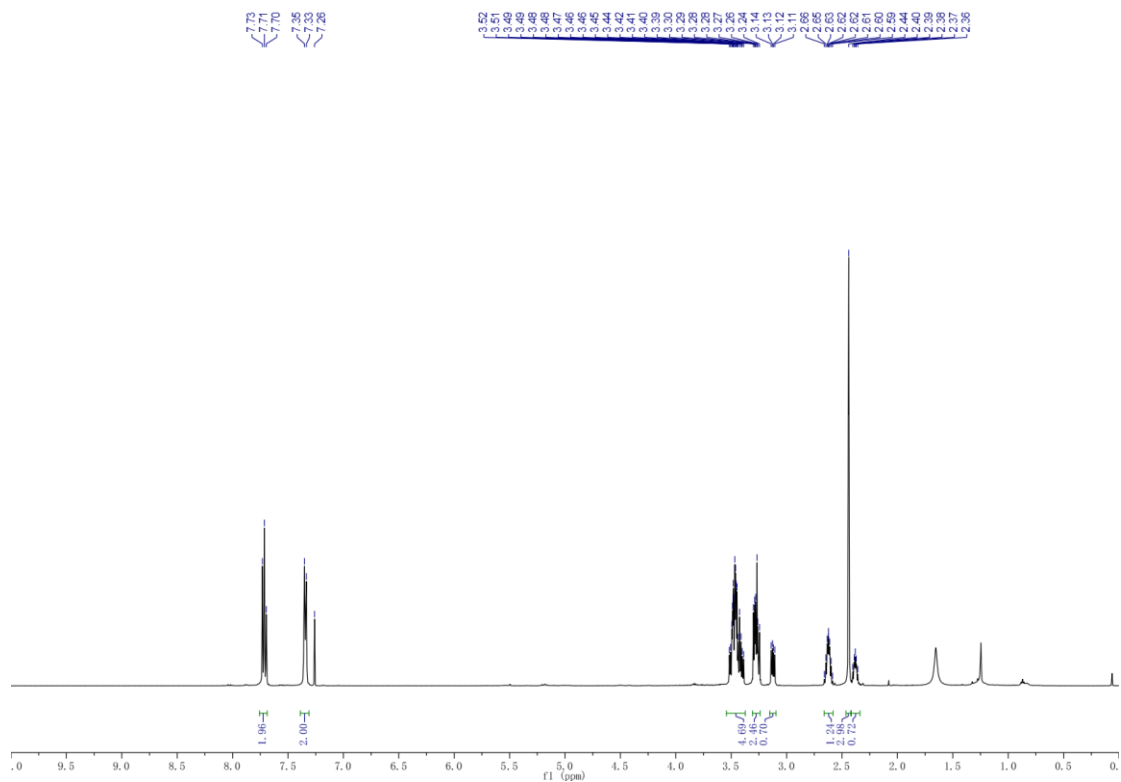

<sup>1</sup>H NMR of compound **200** (500 MHz, CDCl<sub>3</sub>)



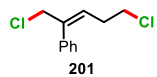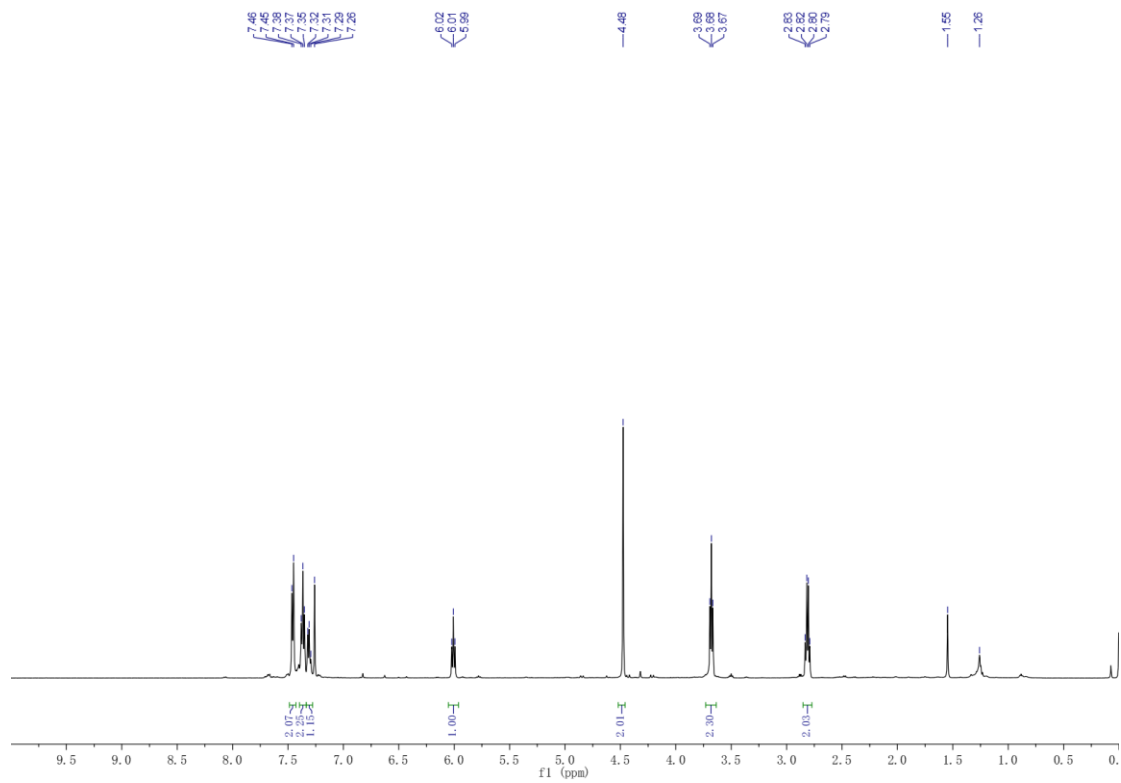

<sup>1</sup>H NMR of compound **201** (500 MHz, CDCl<sub>3</sub>)



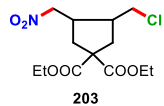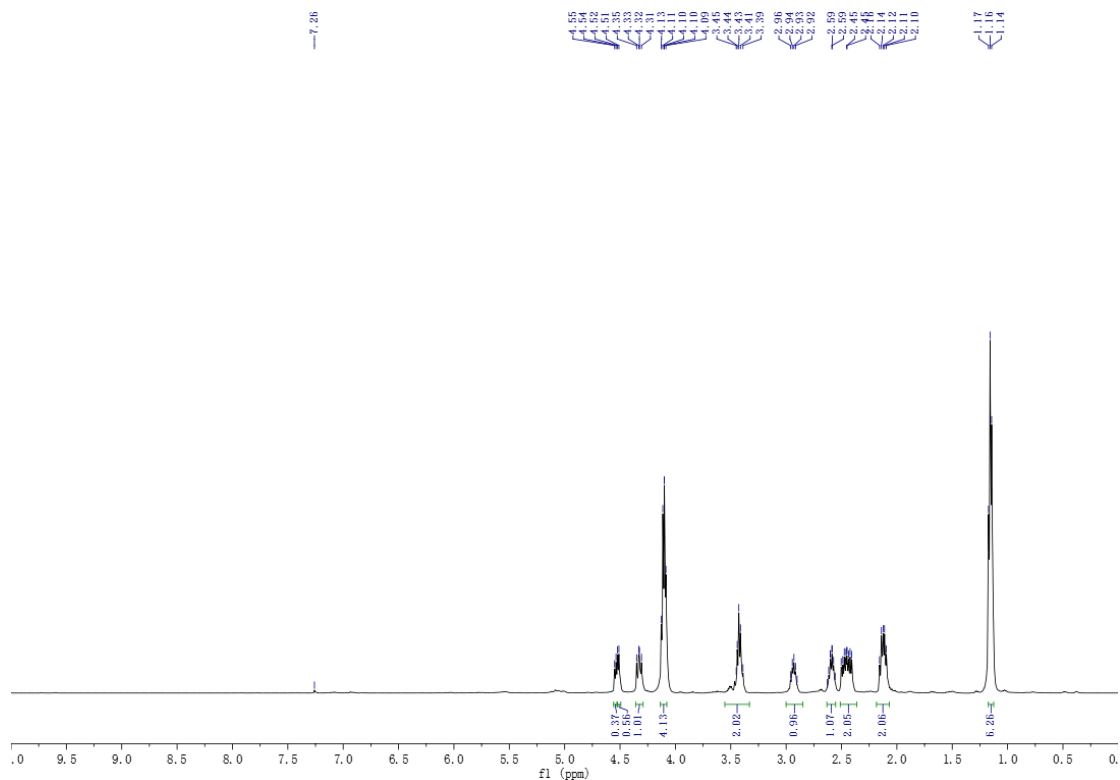

<sup>1</sup>H NMR of compound **203** (500 MHz, CDCl<sub>3</sub>)

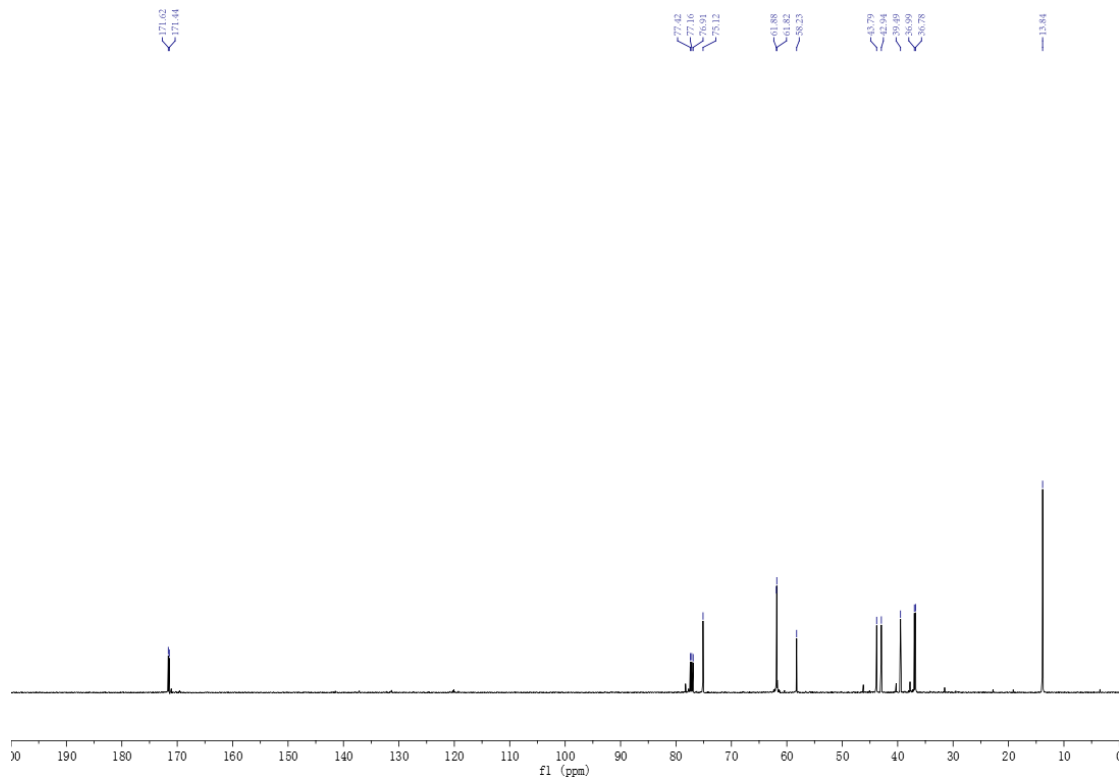

<sup>13</sup>C NMR of compound **203** (126 MHz, CDCl<sub>3</sub>)

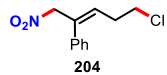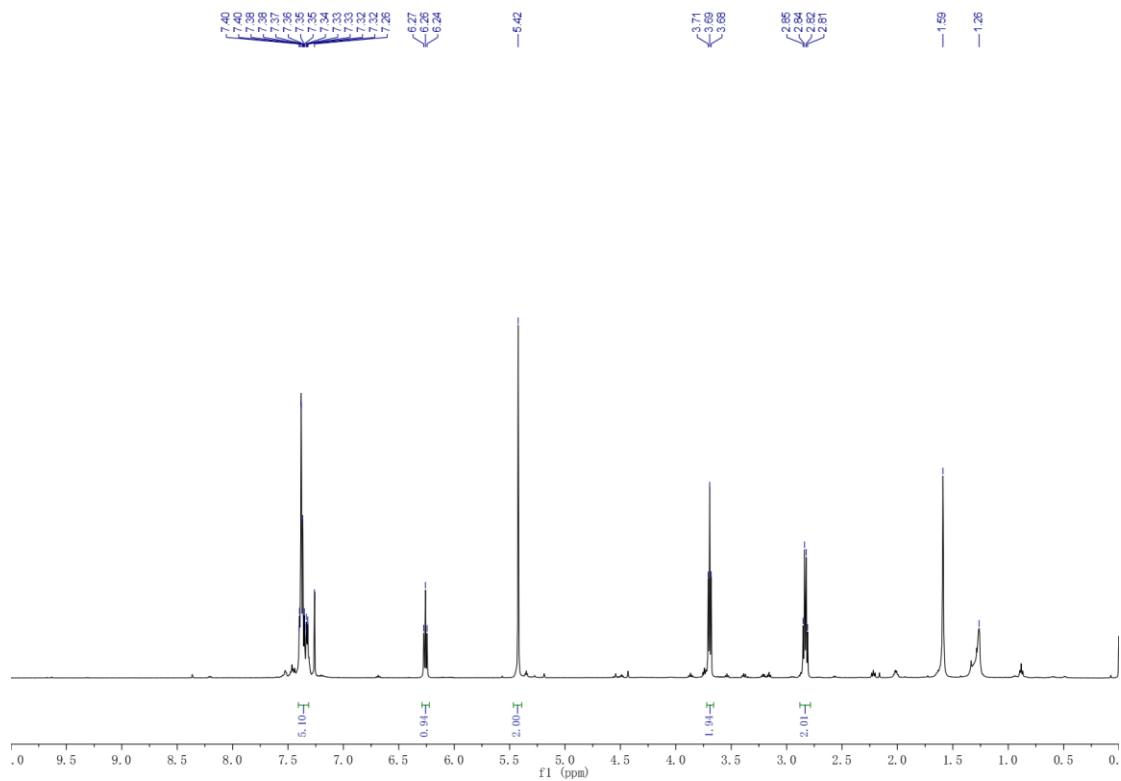

<sup>1</sup>H NMR of compound **204** (500 MHz, CDCl<sub>3</sub>)

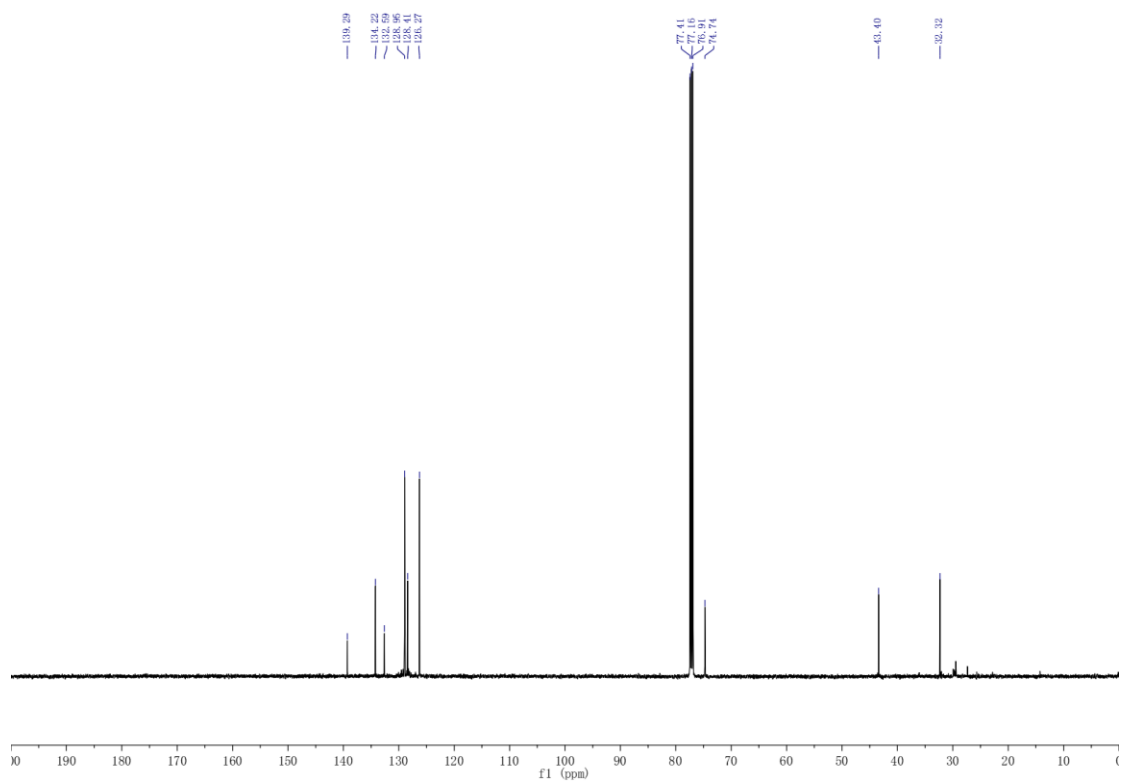

<sup>13</sup>C NMR of compound **204** (126 MHz, CDCl<sub>3</sub>)

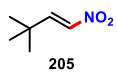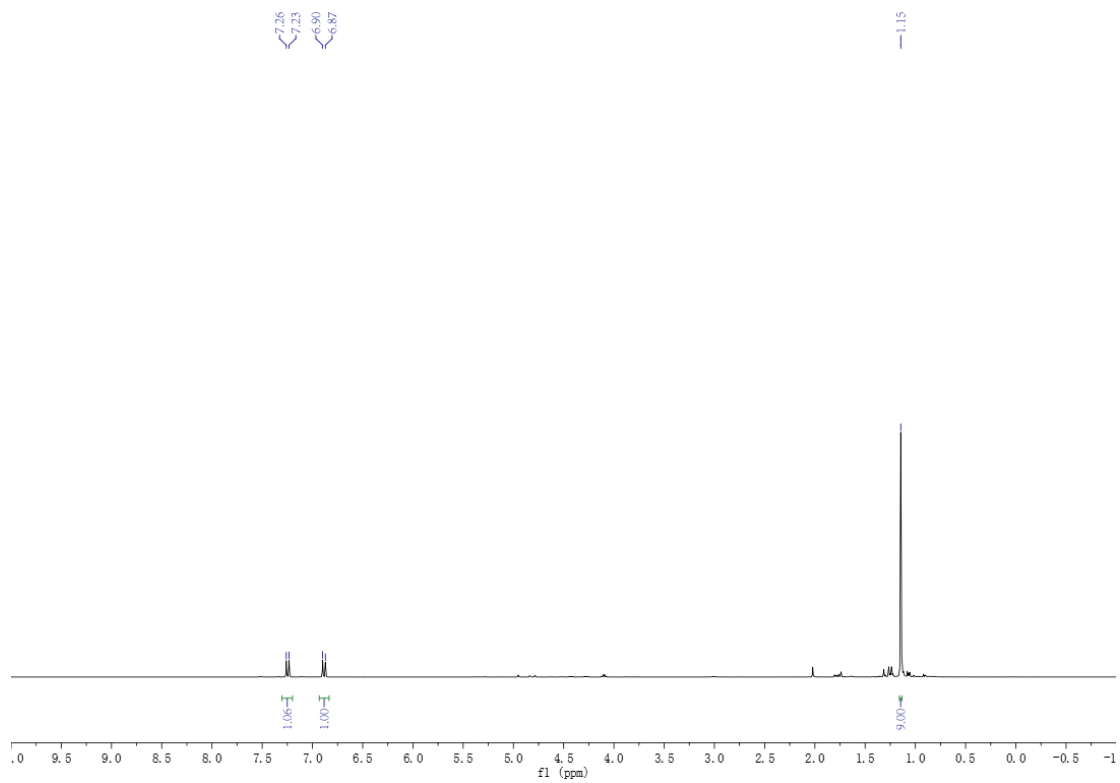

<sup>1</sup>H NMR of compound **205** (500 MHz, CDCl<sub>3</sub>)

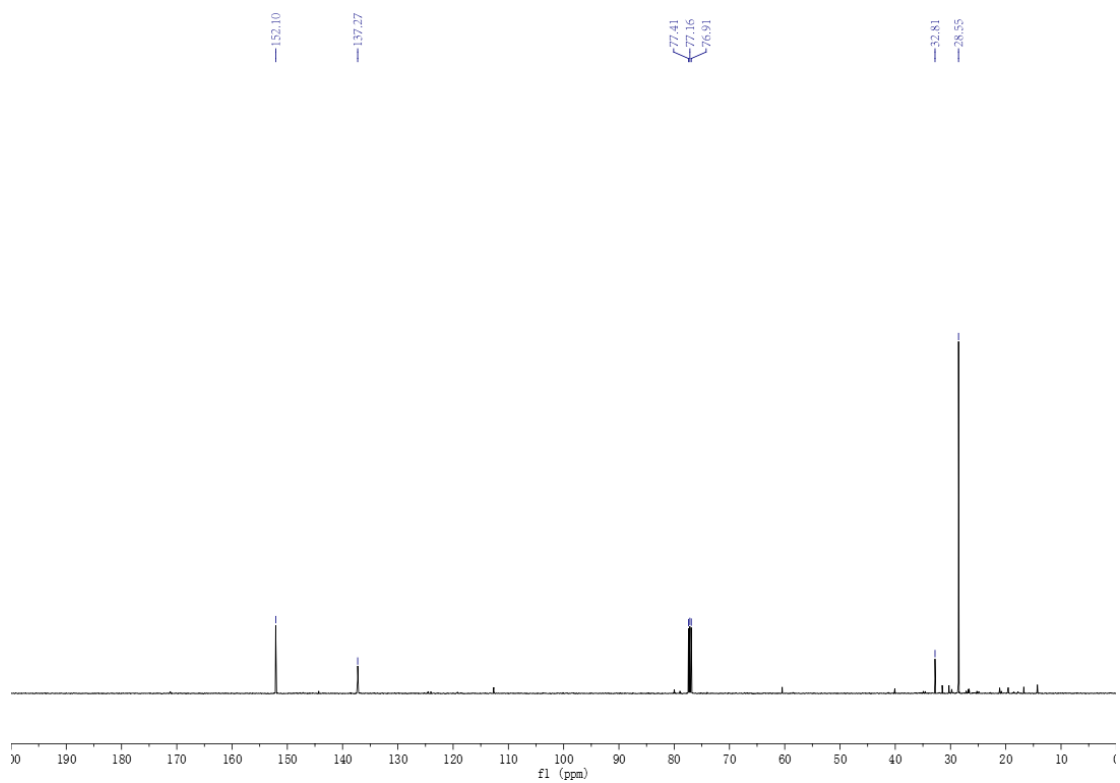

<sup>13</sup>C NMR of compound **205** (126 MHz, CDCl<sub>3</sub>)

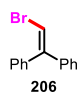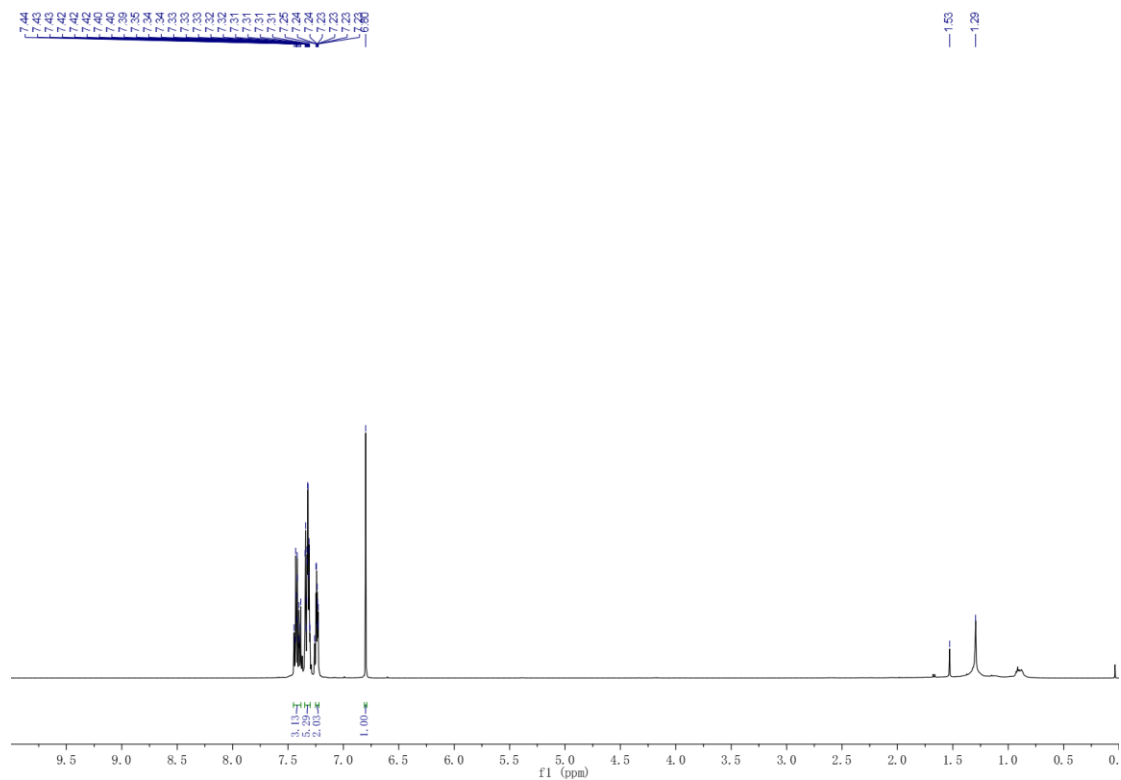

<sup>1</sup>H NMR of compound **206** (500 MHz, CDCl<sub>3</sub>)

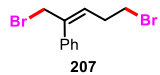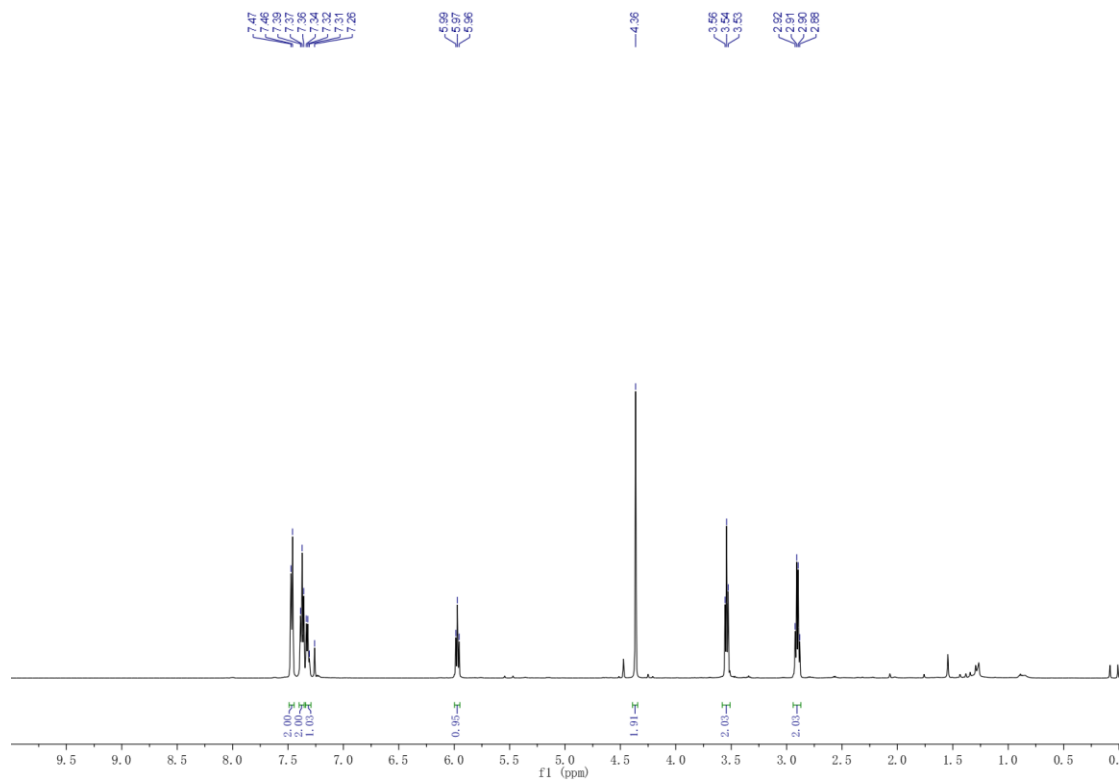

<sup>1</sup>H NMR of compound **207** (500 MHz, CDCl<sub>3</sub>)

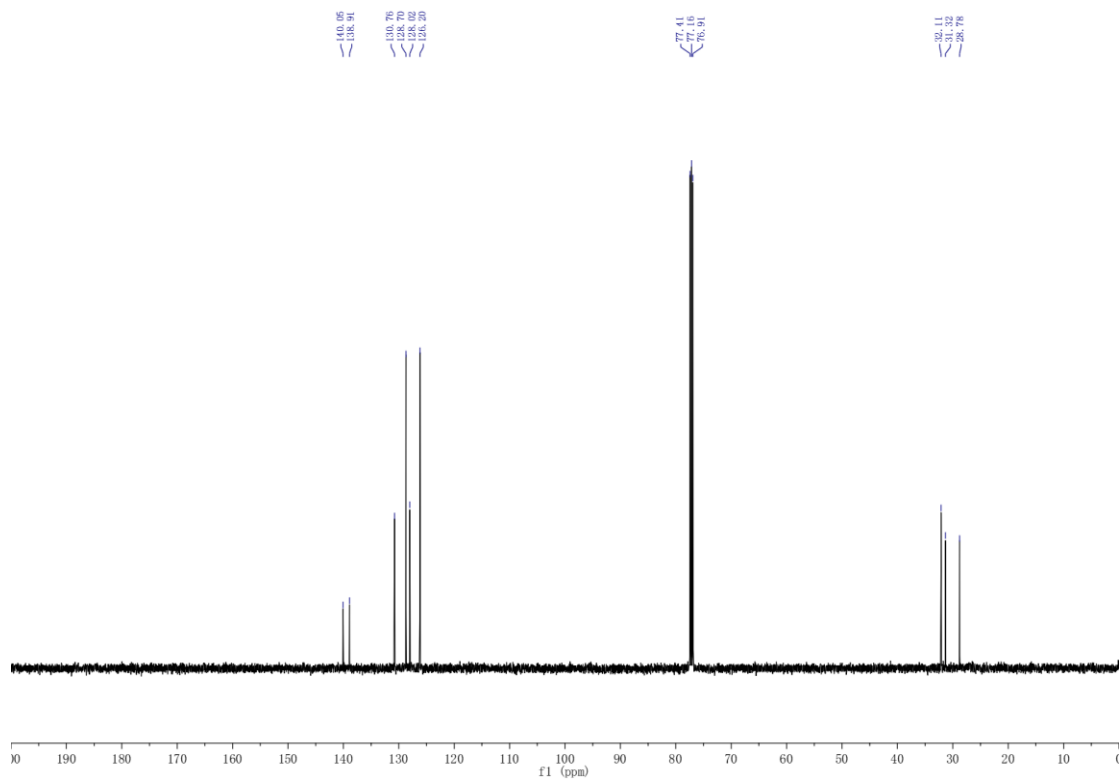

<sup>13</sup>C NMR of compound **207** (126 MHz, CDCl<sub>3</sub>)
